# Supplementary material for: Highly effective identification of drug targets at the proteome level by pH-dependent protein precipitation
Source: Royal Society of Chemistry journal article supplement (doi:10.1039/d2sc03326g), 2022-01-01
Supplement: d2sc03326g2.xlsx [file d2sc03326g2.xlsx]

## Sheet: Sheet1
Protein IDs	Protein names	Gene names	Vehicel_1	Vehicel_2	Vehicel_3	Vehicel_4	Vehicel_5	Drug_6	Drug_7	Drug_8	Drug_9	Drug_10	Distance 1	Distance 2	Distance 3	Distance 4	Distance 5	Distance sum-1	kinase?		Protein IDs	Protein names	Gene names	Vehicel_1	Vehicel_2	Vehicel_3	Vehicel_4	Vehicel_5	Drug_6	Drug_7	Drug_8	Drug_9	Drug_10	Distance 1	Distance 2	Distance 3	Distance 4	Distance 5	Distance sum run2	kinase?
Q13555	Calcium/calmodulin-dependent protein kinase type II subunit gamma;Calcium/calmodulin-dependent protein kinase type II subunit beta	CAMK2G;CAMK2B	1	0.391169	0.226898	0.151505	0.138774	3.07019	2.47471	1.09077	0.429348	0.264634	2.07019	2.08354	0.863868	0.277843	0.125861	5.4213	Yes		Q13555	Calcium/calmodulin-dependent protein kinase type II subunit gamma;Calcium/calmodulin-dependent protein kinase type II subunit beta	CAMK2G;CAMK2B	1	0.430656	0.223772	0.192702	0.231911	3.00094	2.38666	1.22473	0.580799	0.344604	2.00094	1.956	1.00096	0.388097	0.112693	5.45869	Yes
Q13557	Calcium/calmodulin-dependent protein kinase type II subunit delta	CAMK2D	1	0.442998	0.271202	0.209621	0.196298	2.49332	1.71178	0.824099	0.381559	0.245967	1.49332	1.26878	0.552897	0.171937	0.049669	3.5366	Yes		Q13557	Calcium/calmodulin-dependent protein kinase type II subunit delta	CAMK2D	1	0.450043	0.259636	0.218906	0.171613	2.52369	1.79609	0.844108	0.381676	0.252743	1.52369	1.34605	0.584472	0.16277	0.0811298	3.69811	Yes
P49841	Glycogen synthase kinase-3 beta	GSK3B	1	0.841891	0.522856	0.191991	0.138411	1.16633	1.16578	1.08907	1.10279	1.13209	0.166325	0.323887	0.56621	0.910794	0.993681	2.9609	Yes		P49841	Glycogen synthase kinase-3 beta	GSK3B	1	0.777115	0.488722	0.174346	0.10731	1.09975	1.06964	0.973487	0.960228	0.974299	0.0997532	0.292522	0.484765	0.785881	0.866989	2.52991	Yes
Q00535	Cyclin-dependent-like kinase 5	CDK5	1	0.481978	0.235033	0.158239	0.140363	1.87815	1.62459	0.959395	0.175046	0.10211	0.878154	1.14261	0.724362	0.0168071	-0.0382534	2.72368	Yes		Q00535	Cyclin-dependent-like kinase 5	CDK5	1	0.628637	0.554983	0.510691	0.416563	1.34816	1.28392	0.957683	0.444512	0.421129	0.34816	0.655284	0.4027	-0.0661797	0.00456624	1.34453	Yes
Q8IU85	Calcium/calmodulin-dependent protein kinase type 1D	CAMK1D	1	0.70458	0.29803	0.100855	0.0969373	1.31433	1.2257	1.03993	0.704134	0.533757	0.314333	0.521124	0.741904	0.603279	0.436819	2.61746	Yes		Q8IU85	Calcium/calmodulin-dependent protein kinase type 1D	CAMK1D	1	0.711998	0.283172	0.102796	0.0930632	1.25579	1.23579	1.06343	0.716829	0.536437	0.255792	0.52379	0.780261	0.614032	0.443374	2.61725	Yes
Q8N5S9	Calcium/calmodulin-dependent protein kinase kinase 1	CAMKK1	1	0.67118	0.297216	0.165284	0.155595	1.13802	1.07196	0.989253	0.811251	0.761296	0.138023	0.400776	0.692037	0.645967	0.605701	2.4825	Yes		Q8N5S9	Calcium/calmodulin-dependent protein kinase kinase 1	CAMKK1	1	0.682871	0.334303	0.194466	0.163955	1.16712	1.11507	1.02315	0.80745	0.75871	0.167121	0.432199	0.68885	0.612984	0.594755	2.49591	Yes
Q13188	Serine/threonine-protein kinase 3;Serine/threonine-protein kinase 3 36kDa subunit;Serine/threonine-protein kinase 3 20kDa subunit;Serine/threonine-protein kinase 4;Serine/threonine-protein kinase 4 37kDa subunit;Serine/threonine-protein kinase 4 18kDa subunit	STK3;STK4	1	0.607048	0.240532	0.106699	0.123478	1.41476	1.23284	0.93619	0.494705	0.275568	0.414763	0.625797	0.695658	0.388006	0.15209	2.27631	Yes		Q13188	Serine/threonine-protein kinase 3;Serine/threonine-protein kinase 3 36kDa subunit;Serine/threonine-protein kinase 3 20kDa subunit;Serine/threonine-protein kinase 4;Serine/threonine-protein kinase 4 37kDa subunit;Serine/threonine-protein kinase 4 18kDa subunit	STK3;STK4	1	0.813289	0.529321	0.378049	0.310814	1.20199	1.02799	0.84389	0.56018	0.438851	0.20199	0.214704	0.31457	0.182132	0.128037	1.04143	Yes
P49840	Glycogen synthase kinase-3 alpha	GSK3A	1	0.912025	0.620386	0.256733	0.14499	1.13284	1.12808	1.02595	0.938704	0.95191	0.132837	0.21606	0.40556	0.681971	0.80692	2.24335	Yes		P49840	Glycogen synthase kinase-3 alpha	GSK3A	1	0.858855	0.561073	0.247614	0.126622	1.11585	1.0878	1.0057	0.880871	0.905508	0.11585	0.228945	0.444626	0.633257	0.778886	2.20156	Yes
P24941	Cyclin-dependent kinase 2	CDK2	1	0.687425	0.329291	0.200494	0.16084	1.18015	1.02192	0.859675	0.689111	0.502989	0.180154	0.334495	0.530383	0.488617	0.342149	1.8758	Yes		P24941	Cyclin-dependent kinase 2	CDK2	1	0.700057	0.331894	0.194515	0.148791	1.18924	1.0809	0.930237	0.733298	0.543384	0.189239	0.380847	0.598343	0.538782	0.394593	2.10181	Yes
Q14012	Calcium/calmodulin-dependent protein kinase type 1	CAMK1	1	0.831094	0.415735	0.238237	0.180026	1.11258	1.04128	0.932295	0.712513	0.566265	0.112583	0.21019	0.51656	0.474276	0.386239	1.69985	Yes		Q14012	Calcium/calmodulin-dependent protein kinase type 1	CAMK1	1	0.837465	0.404154	0.188956	0.128256	1.10475	1.01022	0.931572	0.701513	0.582493	0.104747	0.172758	0.527418	0.512557	0.454237	1.77172	Yes
P46734	Dual specificity mitogen-activated protein kinase kinase 3	MAP2K3	1	0.660898	0.35298	0.173082	0.183007	1.84712	1.26624	0.437431	0.192914	0.162847	0.847122	0.605341	0.0844511	0.0198318	-0.0201606	1.53659	Yes		P46734	Dual specificity mitogen-activated protein kinase kinase 3	MAP2K3	1	0.681596	0.391615	0.279599	0.187931	1.84195	1.27506	0.561224	0.271703	0.205167	0.841949	0.593465	0.169608	-0.00789608	0.0172366	1.61436	Yes
Q2M2I8	AP2-associated protein kinase 1	AAK1	1	0.725277	0.379454	0.297033	0.232149	1.02325	1.00076	0.909017	0.643704	0.556318	0.0232477	0.275482	0.529563	0.346671	0.32417	1.49913	Yes		Q2M2I8	AP2-associated protein kinase 1	AAK1	1	0.701886	0.312015	0.222802	0.174382	1.07347	1.09835	0.953197	0.700516	0.640813	0.0734736	0.396464	0.641182	0.477714	0.46643	2.05526	Yes
P52564	Dual specificity mitogen-activated protein kinase kinase 6	MAP2K6	1	0.747829	0.389866	0.222183	0.186005	1.26811	1.09699	0.859482	0.469523	0.218402	0.268106	0.349161	0.469616	0.247339	0.0323973	1.36662	Yes		P52564	Dual specificity mitogen-activated protein kinase kinase 6	MAP2K6	1	0.769382	0.366047	0.18692	0.137418	1.20175	1.07506	0.798246	0.429938	0.176463	0.201753	0.305683	0.432199	0.243018	0.0390448	1.2217	Yes
P41240	Tyrosine-protein kinase CSK	CSK	1	0.792669	0.476517	0.213146	0.133078	1.16137	1.06471	0.853056	0.536465	0.287058	0.161372	0.272038	0.37654	0.323319	0.15398	1.28725	Yes		P41240	Tyrosine-protein kinase CSK	CSK	1	0.782014	0.489664	0.256649	0.15677	1.12541	1.01638	0.843368	0.552808	0.332665	0.125407	0.234368	0.353704	0.296159	0.175894	1.18553	Yes
O14757	Serine/threonine-protein kinase Chk1	CHEK1	1	0.708221	0.251323	0.160414	0.118435	1.13145	1.03934	0.634902	0.408628	0.270271	0.131448	0.331123	0.383579	0.248214	0.151837	1.2462	Yes		O14757	Serine/threonine-protein kinase Chk1	CHEK1	1	0.689544	0.251543	0.180632	0.11315	1.27154	1.20123	0.648246	0.424287	0.291019	0.271539	0.511686	0.396704	0.243655	0.17787	1.60145	Yes
Q9P289	Serine/threonine-protein kinase 26	STK26	1	0.558979	0.25387	0.155251	0.12697	1.4374	1.08469	0.430248	0.164628	0.121354	0.437401	0.525712	0.176377	0.00937664	-0.00561561	1.14325	Yes		Q9P289	Serine/threonine-protein kinase 26	STK26	1	0.548545	0.213717	0.116862	0.101886	1.48604	1.09323	0.415591	0.132263	0.0974793	0.486041	0.544688	0.201874	0.0154012	-0.0044065	1.2436	Yes
P06493	Cyclin-dependent kinase 1	CDK1	1	0.477039	0.1828	0.106731	0.0993869	1.6631	0.886571	0.279422	0.10032	0.0685038	0.663104	0.409531	0.0966218	-0.00641171	-0.0308831	1.13196	Yes		P06493	Cyclin-dependent kinase 1	CDK1	1	0.488049	0.203168	0.128361	0.107772	1.60891	0.89088	0.28832	0.118192	0.0880038	0.608909	0.402831	0.0851519	-0.0101686	-0.0197681	1.06695	Yes
P36507	Dual specificity mitogen-activated protein kinase kinase 2	MAP2K2	1	0.678012	0.272593	0.0750224	0.0752352	1.01933	0.900334	0.783392	0.269399	0.071082	0.0193343	0.222322	0.510799	0.194376	-0.00415322	0.942679	Yes		P36507	Dual specificity mitogen-activated protein kinase kinase 2	MAP2K2	1	0.700161	0.282093	0.0947677	0.0803822	1.0768	0.995754	0.77631	0.273284	0.0824342	0.0767996	0.295594	0.494216	0.178516	0.00205199	1.04718	Yes
Q9NWZ3	Interleukin-1 receptor-associated kinase 4	IRAK4	1	0.809339	0.413517	0.238789	0.191351	1.09796	0.985245	0.772238	0.483695	0.215346	0.0979636	0.175906	0.358721	0.244906	0.0239955	0.901492	Yes		Q9NWZ3	Interleukin-1 receptor-associated kinase 4	IRAK4	1	0.834261	0.464921	0.286464	0.195527	1.03625	1.0134	0.839882	0.508186	0.245892	0.0362471	0.179135	0.374961	0.221722	0.050365	0.86243	Yes
P25098	Beta-adrenergic receptor kinase 1;Beta-adrenergic receptor kinase 2	ADRBK1;ADRBK2	1	0.819197	0.460225	0.172276	0.118306	1.07054	0.954976	0.739926	0.38451	0.270201	0.0705369	0.135779	0.279701	0.212234	0.151895	0.850146	Yes		P25098	Beta-adrenergic receptor kinase 1;Beta-adrenergic receptor kinase 2	ADRBK1;ADRBK2	1	0.833895	0.451592	0.178989	0.118695	1.12321	0.998795	0.785688	0.378943	0.263557	0.123214	0.164901	0.334095	0.199954	0.144862	0.967026	Yes
Q9Y6E0	Serine/threonine-protein kinase 24;Serine/threonine-protein kinase 24 36 kDa subunit;Serine/threonine-protein kinase 24 12 kDa subunit	STK24	1	0.778862	0.40428	0.110491	0.0859148	1.03519	0.948358	0.691038	0.331157	0.166233	0.0351935	0.169496	0.286758	0.220665	0.0803181	0.792431	Yes		Q9Y6E0	Serine/threonine-protein kinase 24;Serine/threonine-protein kinase 24 36 kDa subunit;Serine/threonine-protein kinase 24 12 kDa subunit	STK24	1	0.793837	0.403687	0.118074	0.0824259	1.08901	0.972778	0.703276	0.331903	0.171211	0.0890062	0.178941	0.29959	0.21383	0.0887855	0.870152	Yes
Q02750	Dual specificity mitogen-activated protein kinase kinase 1	MAP2K1	1	0.866521	0.557224	0.156233	0.11667	1.01786	0.955383	0.794859	0.420855	0.263128	0.0178561	0.0888617	0.237636	0.264622	0.146457	0.755433	Yes		Q02750	Dual specificity mitogen-activated protein kinase kinase 1	MAP2K1	1	0.867085	0.542809	0.132716	0.0914055	1.00075	0.954323	0.762622	0.407773	0.25263	0.000751048	0.087238	0.219814	0.275057	0.161224	0.744084	Yes
O15530	3-phosphoinositide-dependent protein kinase 1;Putative 3-phosphoinositide-dependent protein kinase 2	PDPK1;PDPK2P	1	0.746041	0.255596	0.0925523	0.0941959	1.17993	1.04468	0.500596	0.129764	0.0848125	0.179926	0.298641	0.245001	0.0372114	-0.00938342	0.751396	Yes		O15530	3-phosphoinositide-dependent protein kinase 1;Putative 3-phosphoinositide-dependent protein kinase 2	PDPK1;PDPK2P	1	0.762303	0.282359	0.151152	0.158297	1.12908	0.963256	0.526899	0.191627	0.149046	0.129084	0.200953	0.244541	0.0404751	-0.00925169	0.605802	Yes
P22612	cAMP-dependent protein kinase catalytic subunit gamma	PRKACG	1	0.923652	0.582335	0.279838	0.154192	0.933245	0.90279	0.729796	0.544217	0.54738	-0.0667555	-0.0208615	0.147461	0.26438	0.393188	0.717413	Yes		P22612	cAMP-dependent protein kinase catalytic subunit gamma	PRKACG	1	0.916338	0.620921	0.330066	0.190491	0.965546	0.901089	0.759052	0.55627	0.57469	-0.0344535	-0.0152493	0.138132	0.226204	0.384199	0.698832	Yes
O96017	Serine/threonine-protein kinase Chk2	CHEK2	1	0.698918	0.344605	0.140923	0.115944	1.15308	0.945097	0.569324	0.185836	0.115192	0.153085	0.246179	0.224719	0.0449122	-0.000751659	0.668144	Yes		O96017	Serine/threonine-protein kinase Chk2	CHEK2	1	0.675169	0.323608	0.144372	0.116028	1.14879	0.956901	0.54254	0.183228	0.10703	0.14879	0.281733	0.218932	0.0388562	-0.00899793	0.679313	Yes
P17612	cAMP-dependent protein kinase catalytic subunit alpha	PRKACA	1	0.850816	0.507418	0.236743	0.103145	0.986984	0.887127	0.648062	0.434262	0.370773	-0.0130165	0.0363115	0.140644	0.197519	0.267628	0.629085	Yes		P17612	cAMP-dependent protein kinase catalytic subunit alpha	PRKACA	1	0.819398	0.474329	0.221358	0.0865671	0.964977	0.855683	0.636008	0.415304	0.351064	-0.0350228	0.0362848	0.161679	0.193946	0.264497	0.621385	Yes
O95747	Serine/threonine-protein kinase OSR1	OXSR1	1	0.609862	0.224222	0.112201	0.100972	1.15056	0.871934	0.417405	0.135007	0.0920207	0.150561	0.262073	0.193183	0.0228061	-0.00895141	0.619671	Yes		O95747	Serine/threonine-protein kinase OSR1	OXSR1	1	0.609884	0.2413	0.112126	0.109731	1.17546	0.880363	0.435967	0.138752	0.0974654	0.175455	0.27048	0.194667	0.0266265	-0.0122652	0.654963	Yes
P51812	Ribosomal protein S6 kinase alpha-3	RPS6KA3	1	0.459946	0.115229	0.0712109	0.0654161	0.52157	0.280841	0.123494	0.0796562	0.0543216	-0.47843	-0.179105	0.00826534	0.00844534	-0.0110945	-0.651919	Yes		P51812	Ribosomal protein S6 kinase alpha-3	RPS6KA3	1	0.452004	0.120048	0.0816056	0.0756694	0.504769	0.267262	0.122789	0.0825504	0.0610986	-0.495231	-0.184742	0.00274094	0.000944714	-0.0145708	-0.690858	Yes
Q05655	Protein kinase C delta type;Protein kinase C delta type regulatory subunit;Protein kinase C delta type catalytic subunit	PRKCD	1	0.814179	0.457796	0.124453	0.103898	0.575778	0.462259	0.268776	0.137461	0.117523	-0.424222	-0.35192	-0.189019	0.0130074	0.0136242	-0.93853	Yes		Q05655	Protein kinase C delta type;Protein kinase C delta type regulatory subunit;Protein kinase C delta type catalytic subunit	PRKCD	1	0.781674	0.479261	0.13756	0.122648	0.639064	0.489854	0.362329	0.188802	0.121226	-0.360936	-0.291819	-0.116932	0.0512423	-0.00142191	-0.719867	Yes
P17252	Protein kinase C alpha type	PRKCA	1	0.784373	0.277774	0.10614	0.102769	0.503409	0.327598	0.183904	0.14089	0.122403	-0.496591	-0.456774	-0.09387	0.0347502	0.0196343	-0.992851	Yes		P17252	Protein kinase C alpha type	PRKCA	1	0.751809	0.278872	0.0967068	0.0730935	0.472068	0.309803	0.164213	0.117465	0.0919638	-0.527932	-0.442005	-0.114659	0.0207585	0.0188703	-1.04497	Yes
Q16512	Serine/threonine-protein kinase N1	PKN1	1	0.750611	0.174873	0.0497387	0.0651668	0.435739	0.226734	0.109175	0.0789538	0.0507491	-0.564261	-0.523877	-0.065698	0.0292151	-0.0144177	-1.13904	Yes		Q16512	Serine/threonine-protein kinase N1	PKN1	1	0.738397	0.172279	0.074031	0.0469075	0.414292	0.258081	0.12381	0.071907	0.0670805	-0.585708	-0.480316	-0.0484694	-0.00212403	0.020173	-1.09644	Yes
Q6ZSR9	Uncharacterized protein FLJ45252		1	0.809638	0.421368	0.342148	0.250621	1.0732	0.956705	0.86262	0.61734	0.5149	0.0732034	0.147067	0.441252	0.275192	0.264279	1.20099	No		Q6ZSR9	Uncharacterized protein FLJ45252		1	0.845762	0.428575	0.263643	0.162321	1.06986	0.916526	0.639082	0.397942	0.297501	0.0698614	0.0707644	0.210507	0.134299	0.13518	0.620611	No
P55263	Adenosine kinase	ADK	1	0.93364	0.722879	0.45242	0.161101	1.0327	1.01276	0.884787	0.719516	0.417113	0.0327046	0.079119	0.161908	0.267096	0.256013	0.79684	No		P55263	Adenosine kinase	ADK	1	0.948978	0.712378	0.453025	0.149768	1.03759	1.01689	0.896202	0.730836	0.422847	0.0375867	0.0679142	0.183824	0.277811	0.273079	0.840215	No
P14635	G2/mitotic-specific cyclin-B1	CCNB1	1	0.634998	0.37979	0.261825	0.18255	1.27205	0.987069	0.583867	0.227348	0.173346	0.272046	0.352071	0.204077	-0.0344769	-0.0092048	0.784513	No		P14635	G2/mitotic-specific cyclin-B1	CCNB1	1	0.685448	0.39885	0.308512	0.210354	1.22685	0.956964	0.611837	0.273071	0.215137	0.226845	0.271516	0.212987	-0.0354413	0.00478315	0.680691	No
Q10713	Mitochondrial-processing peptidase subunit alpha	PMPCA	1	0.85926	0.691133	0.49006	0.214564	1.09367	1.02534	0.83869	0.666268	0.378264	0.0936671	0.166082	0.147557	0.176209	0.163699	0.747214	No		Q10713	Mitochondrial-processing peptidase subunit alpha	PMPCA	1	0.901114	0.670699	0.497423	0.207789	1.10334	1.03413	0.880999	0.710447	0.397154	0.103336	0.133019	0.2103	0.213024	0.189364	0.849045	No
Q9BUL8	Programmed cell death protein 10	PDCD10	1	0.739232	0.438354	0.208566	0.185746	1.09443	0.941522	0.659575	0.329637	0.230036	0.0944251	0.20229	0.221221	0.12107	0.0442904	0.683298	No		Q9BUL8	Programmed cell death protein 10	PDCD10	1	0.754974	0.4274	0.191718	0.171951	1.1149	0.929586	0.659121	0.331818	0.231297	0.114898	0.174612	0.231721	0.1401	0.0593451	0.720676	No
