# Supplementary material for: Highly effective identification of drug targets at the proteome level by pH-dependent protein precipitation
Source: Royal Society of Chemistry journal article supplement (doi:10.1039/d2sc03326g), 2022-01-01
Supplement: d2sc03326g3.xlsx [file d2sc03326g3.xlsx]

## Sheet: pHDPP
Protein IDs	Protein names	Gene names	Reporter intensity corrected 0	Reporter intensity corrected 1	Reporter intensity corrected 2	Reporter intensity corrected 3	Reporter intensity corrected 4	Reporter intensity corrected 5	Reporter intensity corrected 6	Reporter intensity corrected 7	Reporter intensity corrected 8	Reporter intensity corrected 9	Normalized 5	Normalized 6	Normalized 7	Normalized 8	Normalized 9	Vehicel_1	Vehicel_2	Vehicel_3	Vehicel_4	Vehicel_5	Drug_6	Drug_7	Drug_8	Drug_9	Drug_10	Distance1	Distance2	Distance3	Distance4	Distance5	Distance sum	kinase?
O00506	Serine/threonine-protein kinase 25	STK25	12593	13308	7766.6	8535.6	9842.3	27964	22915	20965	17785	14209	27870.2	24093.6	20131.7	17366.3	13986	1	1.05678	0.616739	0.677805	0.781569	2.21315	1.91326	1.59864	1.37905	1.11062	1.21315	0.856479	0.981905	0.701241	0.329046	4.08182	YES
Q86UX6	Serine/threonine-protein kinase 32C	STK32C	38855	27203	19051	23479	15113	74198	50785	54848	44916	37060	73949.2	53397.1	52668	43858.7	36478.3	1	0.700116	0.49031	0.604272	0.388959	1.90321	1.37427	1.3555	1.12878	0.938832	0.903208	0.674151	0.865192	0.524505	0.549873	3.51693	YES
P46734	Dual specificity mitogen-activated protein kinase kinase 3;Dual specificity mitogen-activated protein kinase kinase 6	MAP2K3;MAP2K6	101660	74491	56349	50986	38756	184980	173070	152450	92407	55736	184360	181972	146391	90231.7	54861.2	1	0.732746	0.554289	0.501535	0.381232	1.81349	1.79	1.44	0.887583	0.539654	0.813492	1.05726	0.885715	0.386049	0.158422	3.30094	YES
Q7L7X3	Serine/threonine-protein kinase TAO1	TAOK1	11959	9246.6	4943.2	4212.5	5189.7	16043	15734	14512	10249	9480.9	15989.2	16543.3	13935.2	10007.7	9332.09	1	0.773192	0.413346	0.352245	0.433958	1.337	1.38333	1.16525	0.836837	0.78034	0.337001	0.610141	0.751903	0.484592	0.346383	2.53002	YES
Q00535	Cyclin-dependent-like kinase 5	CDK5	381100	274000	139120	93186	80509	471440	428010	439870	331640	236630	469859	450025	422387	323833	232916	1	0.718971	0.365049	0.244518	0.211254	1.2329	1.18086	1.10834	0.849732	0.611167	0.232902	0.461886	0.743288	0.605214	0.399913	2.4432	YES
P05771	Protein kinase C beta type	PRKCB	568460	436880	326620	213800	176610	781500	624400	626500	534050	484850	778879	656516	601599	521478	477240	1	0.768533	0.57457	0.376104	0.310681	1.37016	1.1549	1.0583	0.917353	0.839531	0.370156	0.38637	0.483727	0.541249	0.52885	2.31035	YES
Q00526	Cyclin-dependent kinase 3	CDK3	56012	46270	32532	22504	19224	66782	62606	67827	54424	50565	66558	65826.1	65131.2	53142.8	49771.3	1	0.826073	0.580804	0.401771	0.343212	1.18828	1.17522	1.16281	0.948776	0.888584	0.188282	0.349142	0.582003	0.547005	0.545371	2.2118	YES
P16591	Tyrosine-protein kinase Fer	FER	147090	113530	85477	79906	57595	234150	188480	181800	118470	75036	233365	198174	174574	115681	73858.3	1	0.77184	0.58112	0.543246	0.391563	1.58654	1.3473	1.18685	0.786465	0.50213	0.586544	0.575461	0.605733	0.24322	0.110567	2.12152	YES
Q14680	Maternal embryonic leucine zipper kinase	MELK	19672	16412	11798	11322	12581	35451	26615	23797	15752	11498	35332.1	27983.9	22851.2	15381.2	11317.5	1	0.834282	0.599736	0.575539	0.639538	1.79606	1.42253	1.16161	0.781882	0.575312	0.796061	0.588245	0.561873	0.206344	-0.0642268	2.0883	YES
O14733	Dual specificity mitogen-activated protein kinase kinase 7	MAP2K7	125850	87507	60019	47192	43941	222480	163430	122570	61654	42612	221734	171836	117698	60202.6	41943.2	1	0.695328	0.476909	0.374986	0.349154	1.76189	1.3654	0.935227	0.478368	0.333279	0.76189	0.670076	0.458318	0.103382	-0.0158747	1.97779	YES
Q9UHD2	Serine/threonine-protein kinase TBK1	TBK1	81131	38952	26689	31651	23449	137440	93947	65388	30302	21232	136979	98779.2	62789.1	29588.7	20898.7	1	0.480112	0.328962	0.390122	0.289026	1.68837	1.21753	0.773922	0.364702	0.257593	0.688369	0.737415	0.444961	-0.0254197	-0.0314337	1.81389	YES
Q13043	Serine/threonine-protein kinase 4;Serine/threonine-protein kinase 4 37kDa subunit;Serine/threonine-protein kinase 4 18kDa subunit	STK4	446170	367920	259690	197130	153950	512500	460730	474420	389950	393270	510781	484428	455564	380770	387097	1	0.824618	0.582043	0.441827	0.345048	1.14481	1.08575	1.02105	0.85342	0.867601	0.144813	0.261129	0.439011	0.411593	0.522553	1.7791	YES
Q13555	Calcium/calmodulin-dependent protein kinase type II subunit gamma;Calcium/calmodulin-dependent protein kinase type II subunit alpha;Calcium/calmodulin-dependent protein kinase type II subunit delta;Calcium/calmodulin-dependent protein kinase type II subunit beta	CAMK2G;CAMK2A;CAMK2D;CAMK2B	30982	29597	27108	17435	15466	42478	39725	37796	28540	26978	42335.5	41768.3	36293.8	27868.2	26554.6	1	0.955297	0.87496	0.562746	0.499193	1.36646	1.34815	1.17145	0.899495	0.857096	0.366456	0.392849	0.296487	0.336749	0.357903	1.75044	YES
P27448	MAP/microtubule affinity-regulating kinase 3	MARK3	431210	360370	326110	246310	214570	510050	451190	495110	414850	430840	508339	474397	475431	405084	424078	1	0.835718	0.756267	0.571207	0.4976	1.17887	1.10015	1.10255	0.939413	0.98346	0.178867	0.264435	0.346285	0.368206	0.48586	1.64365	YES
O96013	Serine/threonine-protein kinase PAK 4	PAK4	189790	166280	124310	95998	78996	213850	203940	202340	172900	176480	213133	214430	194298	168830	173710	1	0.876126	0.654987	0.505812	0.416228	1.12299	1.12983	1.02375	0.889561	0.915275	0.122993	0.2537	0.368765	0.38375	0.499046	1.62825	YES
Q05823	2-5A-dependent ribonuclease	RNASEL	931.86	483.53	422.9	332.17	125.8	1643.3	802.97	787.62	345.22	189.85	1637.79	844.271	756.315	337.093	186.87	1	0.518887	0.453824	0.356459	0.134999	1.75755	0.906006	0.811619	0.361742	0.200535	0.757548	0.387119	0.357796	0.00528336	0.0655358	1.57328	YES
Q99986	Serine/threonine-protein kinase VRK1	VRK1	953320	702140	457560	255300	201920	1225300	946160	899560	614610	381230	1.22119e+06	994826	863806	600142	375246	1	0.736521	0.479965	0.267801	0.211807	1.28099	1.04354	0.906103	0.629528	0.393621	0.280987	0.307017	0.426138	0.361727	0.181813	1.55768	YES
Q32MK0	Myosin light chain kinase 3	MYLK3	227170	190380	175270	144140	124270	290750	245430	252550	210330	202920	289775	258054	242512	205379	199735	1	0.838051	0.771537	0.634503	0.547035	1.27559	1.13595	1.06754	0.904075	0.879232	0.275586	0.297899	0.295999	0.269572	0.332196	1.47125	YES
Q7KZI7	Serine/threonine-protein kinase MARK2	MARK2	63127	55117	53349	45028	39123	75492	66889	71206	64029	63659	75238.8	70329.4	68375.9	62521.7	62659.8	1	0.873113	0.845106	0.713292	0.619751	1.19186	1.11409	1.08315	0.990412	0.992599	0.191864	0.240982	0.238042	0.27712	0.372849	1.32086	YES
P53350	Serine/threonine-protein kinase PLK1	PLK1	16175	13559	10543	9188.5	8139.7	21255	15694	18463	13496	10527	21183.7	16501.2	17729.2	13178.3	10361.8	1	0.838269	0.651808	0.568068	0.503227	1.30966	1.02017	1.09608	0.814732	0.640604	0.309658	0.181899	0.444276	0.246664	0.137377	1.31988	YES
Q9P289	Serine/threonine-protein kinase 26	STK26	325690	250580	195080	153100	117760	442020	338960	315010	213800	153100	440538	356394	302490	208767	150697	1	0.769382	0.598974	0.470079	0.361571	1.35263	1.09428	0.928766	0.640999	0.462701	0.352629	0.324893	0.329791	0.17092	0.10113	1.27936	YES
Q9NWZ3	Interleukin-1 receptor-associated kinase 4	IRAK4	549360	482890	402000	298990	226960	607670	540190	536880	473010	448690	605632	567975	515541	461875	441647	1	0.879005	0.731761	0.544251	0.413135	1.10243	1.03388	0.93844	0.840751	0.803931	0.102432	0.15488	0.206679	0.2965	0.390796	1.15129	YES
P51617	Interleukin-1 receptor-associated kinase 1	IRAK1	105070	67624	52910	62580	38039	128630	106460	96232	61979	47074	128199	111936	92407.2	60520	46335.1	1	0.643609	0.503569	0.595603	0.362035	1.22013	1.06534	0.879482	0.575997	0.440993	0.220126	0.421736	0.375913	-0.0196061	0.0789582	1.07713	YES
Q9UEW8	STE20/SPS1-related proline-alanine-rich protein kinase	STK39	38877	29430	20915	17962	15901	59613	39088	30076	18831	15113	59413.1	41098.5	28880.6	18387.7	14875.8	1	0.757003	0.537979	0.462021	0.409008	1.52823	1.05714	0.742871	0.472971	0.382637	0.528232	0.300139	0.204892	0.0109502	-0.0263706	1.01784	YES
O95747	Serine/threonine-protein kinase OSR1	OXSR1	692300	438220	278810	225740	195430	969700	629640	464160	247730	205480	966448	662026	445712	241898	202255	1	0.632991	0.40273	0.326073	0.282291	1.396	0.95627	0.643813	0.349413	0.292149	0.395996	0.323278	0.241083	0.02334	0.00985822	0.993555	YES
P36507	Dual specificity mitogen-activated protein kinase kinase 2	MAP2K2	759490	625830	523150	324020	223390	795060	651350	697200	569870	468010	792394	684852	669489	556455	460664	1	0.824013	0.688817	0.426628	0.294132	1.04332	0.901727	0.881498	0.732669	0.606544	0.0433233	0.0777131	0.192681	0.306041	0.312413	0.932171	YES
O14976	Cyclin-G-associated kinase	GAK	393110	326490	261110	174600	162600	439790	399340	393680	239850	194800	438315	419880	378033	234204	191742	1	0.830531	0.664216	0.44415	0.413625	1.11499	1.0681	0.961646	0.595772	0.487758	0.114993	0.237567	0.29743	0.151621	0.0741331	0.875746	YES
P24941	Cyclin-dependent kinase 2	CDK2	391910	326190	310540	214530	165860	396710	351470	369270	326050	319170	395380	369548	354593	318375	314160	1	0.832308	0.792376	0.547396	0.423209	1.00885	0.942941	0.904782	0.812367	0.801614	0.00885292	0.110632	0.112406	0.264971	0.378404	0.875266	YES
P06493	Cyclin-dependent kinase 1	CDK1	1022300	671260	391790	252310	197410	1183200	902440	720480	356730	259190	1.17923e+06	948857	691844	348332	255122	1	0.656617	0.383244	0.246806	0.193104	1.15351	0.928159	0.676752	0.340734	0.249557	0.153509	0.271542	0.293509	0.0939278	0.0564529	0.86894	YES
Q9Y6E0	Serine/threonine-protein kinase 24;Serine/threonine-protein kinase 24 36 kDa subunit;Serine/threonine-protein kinase 24 12 kDa subunit	STK24	518410	453370	389360	281420	222070	566630	504290	501760	402060	344510	564730	530228	481817	392595	339103	1	0.874539	0.751066	0.542852	0.428368	1.08935	1.0228	0.929413	0.757307	0.654121	0.0893495	0.148258	0.178347	0.214454	0.225753	0.856162	YES
O96017	Serine/threonine-protein kinase Chk2	CHEK2	337980	268200	216280	147190	104620	364190	294250	319350	224370	166340	362969	309385	306657	219088	163729	1	0.793538	0.63992	0.435499	0.309545	1.07394	0.915394	0.907323	0.648228	0.484435	0.0739352	0.121856	0.267404	0.212729	0.17489	0.850814	YES
O14757	Serine/threonine-protein kinase Chk1	CHEK1	360890	321610	275090	209430	129300	432970	333270	329020	268680	228060	431518	350412	315943	262355	224480	1	0.891158	0.762254	0.580315	0.358281	1.1957	0.970966	0.875455	0.726967	0.622019	0.195705	0.0798077	0.1132	0.146652	0.263738	0.799103	YES
O00444	Serine/threonine-protein kinase PLK4	PLK4	3555.6	3510	2778	1775.3	2011.2	3254.6	3113.7	3613.1	3145	3465.3	3243.68	3273.85	3469.49	3070.97	3410.91	1	0.987175	0.781303	0.499297	0.565643	0.912275	0.92076	0.975783	0.863698	0.959306	-0.087725	-0.0664153	0.19448	0.364401	0.393663	0.798405	YES
P41240	Tyrosine-protein kinase CSK	CSK	552960	514820	465310	335260	298920	570300	565780	551680	452450	454050	568387	594881	529753	441799	446923	1	0.931026	0.841489	0.606301	0.540582	1.0279	1.07581	0.958031	0.798971	0.808238	0.0278996	0.144786	0.116542	0.192671	0.267657	0.749555	YES
Q13188	Serine/threonine-protein kinase 3;Serine/threonine-protein kinase 3 36kDa subunit;Serine/threonine-protein kinase 3 20kDa subunit	STK3	327980	288700	258930	188280	157550	339240	304760	307110	268360	248680	338102	320435	294904	262043	244777	1	0.880237	0.789469	0.574059	0.480365	1.03086	0.976997	0.899151	0.798959	0.746316	0.0308625	0.0967601	0.109682	0.2249	0.265952	0.728157	YES
Q5VT25	Serine/threonine-protein kinase MRCK alpha	CDC42BPA	318570	241940	158460	127020	107560	375270	277030	263570	162220	109450	374011	291279	253094	158401	107732	1	0.759456	0.49741	0.398719	0.337634	1.17403	0.914333	0.79447	0.497226	0.338174	0.174032	0.154877	0.297059	0.0985066	0.000540239	0.725015	YES
P25098	Beta-adrenergic receptor kinase 1	ADRBK1	318510	289130	256470	186150	167400	340800	301060	301030	253100	254230	339657	316545	289065	247142	250240	1	0.907758	0.805218	0.58444	0.525572	1.06639	0.993831	0.907555	0.775931	0.785657	0.0663937	0.0860729	0.102337	0.191491	0.260085	0.70638	YES
P19525	Interferon-induced, double-stranded RNA-activated protein kinase	EIF2AK2	248480	156390	126570	106510	90760	329230	200020	166580	108200	98885	328126	210308	159959	105653	97332.9	1	0.629387	0.509377	0.428646	0.365261	1.32053	0.846378	0.643751	0.425197	0.391713	0.320532	0.216992	0.134374	-0.00344929	0.0264525	0.694901	YES
Q8IU85	Calcium/calmodulin-dependent protein kinase type 1D	CAMK1D	26142	20561	17629	14528	11386	30682	21588	20882	18694	16848	30579.1	22698.4	20052	18253.9	16583.6	1	0.786512	0.674355	0.555734	0.435544	1.16973	0.868273	0.767043	0.698261	0.634365	0.169731	0.0817605	0.0926871	0.142527	0.19882	0.685525	YES
Q96GX5	Serine/threonine-protein kinase greatwall	MASTL	64650	52332	49153	34294	29444	67186	55191	61445	48808	42284	66960.7	58029.8	59002.8	47659	41620.3	1	0.809466	0.760294	0.530456	0.455437	1.03574	0.897599	0.91265	0.737185	0.643779	0.0357413	0.0881324	0.152356	0.206729	0.188342	0.671301	YES
O15530	3-phosphoinositide-dependent protein kinase 1;Putative 3-phosphoinositide-dependent protein kinase 2	PDPK1;PDPK2P	355180	307570	278410	177990	128230	363320	318940	328710	263930	217950	362102	335345	315645	257717	214529	1	0.865955	0.783856	0.501126	0.361028	1.01949	0.944154	0.888691	0.725595	0.604001	0.0194874	0.078199	0.104835	0.224469	0.242973	0.669963	YES
Q9BQI3	Eukaryotic translation initiation factor 2-alpha kinase 1	EIF2AK1	38991	29918	25543	20836	14228	49304	27147	27035	22124	30627	49138.6	28543.3	25960.5	21603.2	30146.3	1	0.767305	0.6551	0.53438	0.364905	1.26026	0.732049	0.665807	0.554056	0.77316	0.260256	-0.0352566	0.0107068	0.0196761	0.408255	0.663638	YES
P11802	Cyclin-dependent kinase 4	CDK4	94896	80317	70324	58411	54046	121730	89093	84150	67768	59467	121322	93675.5	80805.4	66172.7	58533.6	1	0.846369	0.741064	0.615526	0.569529	1.27847	0.987139	0.851515	0.697318	0.616819	0.278471	0.14077	0.110451	0.0817917	0.0472899	0.658774	YES
P15735	Phosphorylase b kinase gamma catalytic chain, liver/testis isoform	PHKG2	50470	39082	31255	23316	18143	56101	41355	44216	30798	23093	55912.9	43482.1	42458.6	30073	22730.5	1	0.774361	0.619279	0.461977	0.359481	1.10784	0.861544	0.841264	0.595859	0.450377	0.107843	0.0871825	0.221985	0.133882	0.0908964	0.641789	YES
P07948	Tyrosine-protein kinase Lyn	LYN	147960	133980	127120	108400	92970	156430	138420	152500	130840	129310	155905	145540	146439	127760	127280	1	0.905515	0.859151	0.73263	0.628345	1.0537	0.983642	0.989719	0.863476	0.860235	0.0536995	0.0781269	0.130567	0.130846	0.23189	0.625129	YES
P49841	Glycogen synthase kinase-3 beta	GSK3B	393750	348830	320040	256030	218260	411620	358510	366240	328510	323390	410240	376950	351683	320777	318314	1	0.885917	0.8128	0.650235	0.554311	1.04188	0.957333	0.893164	0.814671	0.808417	0.0418782	0.0714159	0.0803644	0.164436	0.254106	0.6122	YES
P50750	Cyclin-dependent kinase 9	CDK9	314070	261190	238880	193480	140150	355230	262740	285460	235730	203400	354039	276254	274114	230181	200207	1	0.83163	0.760595	0.616041	0.446238	1.12726	0.879594	0.87278	0.732896	0.637461	0.12726	0.0479641	0.112186	0.116855	0.191223	0.595489	YES
Q9NSY1	BMP-2-inducible protein kinase	BMP2K	668200	565580	514320	340980	288560	685130	565160	580270	491500	468150	682832	594229	557207	479930	460802	1	0.846423	0.76971	0.510296	0.431847	1.0219	0.889298	0.833892	0.718243	0.689617	0.021898	0.042875	0.0641824	0.207946	0.25777	0.594672	YES
P22694	cAMP-dependent protein kinase catalytic subunit beta	PRKACB	8195.1	7640.2	6431.1	5921	5390.3	8506.8	7565.5	8844.9	7616.7	5999.8	8478.27	7954.63	8493.35	7437.4	5905.63	1	0.932289	0.784749	0.722505	0.657747	1.03455	0.970657	1.03639	0.907542	0.720629	0.0345537	0.0383684	0.251644	0.185037	0.0628826	0.572486	YES
P49840	Glycogen synthase kinase-3 alpha	GSK3A	134830	123710	118170	90292	93534	139710	129550	137390	116770	116540	139241	136213	131929	114021	114711	1	0.917526	0.876437	0.669673	0.693718	1.03272	1.01026	0.978486	0.845666	0.850781	0.0327186	0.0927347	0.102049	0.175993	0.157063	0.560559	YES
O94804	Serine/threonine-protein kinase 10	STK10	100940	88153	78397	44118	28863	105770	86932	95467	65117	45692	105415	91403.4	91672.6	63584.1	44974.8	1	0.873321	0.776669	0.437072	0.285942	1.04434	0.905522	0.908189	0.62992	0.44556	0.044336	0.0322009	0.13152	0.192848	0.159618	0.560523	YES
P17252	Protein kinase C alpha type	PRKCA	238020	191860	147770	88512	49985	218600	186500	176460	134440	135590	217867	196093	169446	131275	133462	1	0.806067	0.62083	0.371868	0.210003	0.91533	0.823849	0.7119	0.55153	0.560717	-0.0846699	0.0177828	0.0910698	0.179662	0.350713	0.554558	YES
Q2M2I8	AP2-associated protein kinase 1	AAK1	103180	88501	80661	64205	50263	100470	85036	95838	83210	79575	100133	89409.8	92028.8	81251.2	78326	1	0.857734	0.78175	0.622262	0.487139	0.97047	0.866542	0.891925	0.78747	0.75912	-0.0295304	0.0088083	0.110175	0.165208	0.271981	0.526642	YES
Q9Y2K2	Serine/threonine-protein kinase SIK3	SIK3	109270	100140	87121	66060	63019	114380	109860	103860	76321	80619	113996	115511	99732	74524.4	79353.6	1	0.916446	0.7973	0.604558	0.576727	1.04325	1.05711	0.912712	0.68202	0.726216	0.0432543	0.140667	0.115411	0.0774629	0.149489	0.526284	YES
Q9H2G2	STE20-like serine/threonine-protein kinase	SLK	1453100	1196200	1127600	819440	664730	1551200	1252600	1324200	1049800	877610	1.546e+06	1.31703e+06	1.27157e+06	1.02509e+06	863835	1	0.823206	0.775996	0.563925	0.457456	1.06393	0.906357	0.875073	0.705448	0.594478	0.0639307	0.0831517	0.0990768	0.141523	0.137021	0.524703	YES
Q9BVS4	Serine/threonine-protein kinase RIO2	RIOK2	236210	181650	137190	101920	87917	284260	205900	176960	108310	92565	283307	216490	169927	105760	91112.1	1	0.769019	0.580797	0.43148	0.372198	1.19938	0.916517	0.719388	0.447739	0.385725	0.199385	0.147498	0.138591	0.0162581	0.0135266	0.515258	YES
P53778	Mitogen-activated protein kinase 12	MAPK12	45854	42593	38386	35121	25735	52137	40357	46927	39067	34087	51962.1	42432.8	45061.8	38147.3	33552	1	0.928883	0.837135	0.765931	0.561238	1.13321	0.925389	0.982724	0.831931	0.731713	0.133209	-0.00349438	0.145589	0.0659996	0.170475	0.511778	YES
P33981	Dual specificity protein kinase TTK	TTK	312810	276600	251340	233860	191230	331980	305720	322530	249670	222310	330867	321445	309711	243793	218821	1	0.884243	0.803491	0.74761	0.61133	1.05772	1.0276	0.990092	0.779363	0.699532	0.057724	0.143361	0.186601	0.031753	0.0882027	0.507642	YES
Q96RG2	PAS domain-containing serine/threonine-protein kinase	PASK	40130	37830	32752	23857	17250	42991	37143	39760	28654	22219	42846.8	39053.5	38179.7	27979.5	21870.3	1	0.942686	0.816148	0.594493	0.429853	1.0677	0.973174	0.951401	0.697221	0.544985	0.0677005	0.0304873	0.135253	0.102728	0.115132	0.451301	YES
Q8NI60	Atypical kinase ADCK3, mitochondrial	ADCK3	39532	46756	31902	23333	29036	50767	47871	31876	29689	28192	50596.7	50333.3	30609.1	28990.1	27749.5	1	1.18274	0.806992	0.590231	0.734494	1.27989	1.27323	0.774286	0.733333	0.70195	0.279893	0.09049	-0.0327062	0.143102	-0.0325431	0.448236	YES
Q13164	Mitogen-activated protein kinase 7	MAPK7	54691	48860	38143	32921	26866	65653	47822	53029	32561	27465	65432.8	50281.7	50921.3	31794.5	27033.9	1	0.893383	0.697427	0.601945	0.491233	1.19641	0.919379	0.931073	0.581348	0.494303	0.196409	0.0259957	0.233646	-0.0205976	0.00307029	0.438523	YES
Q15418	Ribosomal protein S6 kinase alpha-1	RPS6KA1	736830	571930	302980	152660	129060	685970	549570	516680	293150	172070	683669	577837	496144	286249	169369	1	0.776203	0.411194	0.207185	0.175156	0.927852	0.784221	0.673349	0.388487	0.229862	-0.0721476	0.00801707	0.262156	0.181302	0.0547063	0.434034	YES
P42684	Abelson tyrosine-protein kinase 2	ABL2	84743	76764	66173	50568	51771	85048	78920	83533	61522	55174	84762.8	82979.3	80212.9	60073.7	54308	1	0.905845	0.780867	0.596722	0.610918	1.00023	0.979187	0.946543	0.708893	0.640855	0.000233332	0.0733425	0.165676	0.112171	0.0299376	0.381361	YES
P00519	Tyrosine-protein kinase ABL1	ABL1	463060	398910	380570	298240	265010	506970	407110	425890	341080	304420	505270	428050	408963	333051	299642	1	0.861465	0.821859	0.644063	0.572302	1.09115	0.924394	0.883174	0.719239	0.647091	0.091154	0.0629287	0.0613152	0.0751756	0.0747892	0.365363	YES
O43353	Receptor-interacting serine/threonine-protein kinase 2	RIPK2	65962	62672	57621	46815	42134	76304	61595	65503	52696	44504	76048.1	64763.1	62899.5	51455.5	43805.5	1	0.950123	0.873548	0.709727	0.638762	1.15291	0.981825	0.953572	0.780078	0.664102	0.152908	0.0317023	0.0800237	0.0703513	0.02534	0.360325	YES
Q00534	Cyclin-dependent kinase 6	CDK6	464070	388820	343430	260470	232620	478800	412250	407630	291300	250960	477194	433454	391428	284443	247021	1	0.837848	0.740039	0.561273	0.501261	1.02828	0.934028	0.843468	0.61293	0.532293	0.0282807	0.0961798	0.103429	0.0516574	0.031032	0.310579	YES
P43250	G protein-coupled receptor kinase 6	GRK6	48684	37243	31785	26338	22244	61062	42903	36848	23954	16682	60857.2	45109.7	35383.4	23390.1	16420.2	1	0.764995	0.652884	0.540999	0.456906	1.25005	0.926582	0.726798	0.480448	0.337281	0.250046	0.161587	0.0739143	-0.0605515	-0.119625	0.30537	YES
Q8IV63	Inactive serine/threonine-protein kinase VRK3	VRK3	28530	26859	23697	19144	14034	37947	24386	23891	18807	16468	37819.7	25640.3	22941.4	18364.3	16209.5	1	0.94143	0.830599	0.671013	0.491903	1.32561	0.898714	0.804116	0.643683	0.568157	0.325613	-0.0427165	-0.0264833	-0.02733	0.0762539	0.305337	YES
O43683	Mitotic checkpoint serine/threonine-protein kinase BUB1	BUB1	148580	129180	123120	108550	82221	183520	126710	134560	110200	84825	182905	133227	129212	107606	83493.6	1	0.869431	0.828645	0.730583	0.553379	1.23102	0.896671	0.869645	0.724228	0.561944	0.231017	0.0272402	0.0410001	-0.00635457	0.00856516	0.301468	YES
P51817	cAMP-dependent protein kinase catalytic subunit PRKX;Putative serine/threonine-protein kinase PRKY	PRKX;PRKY	68410	54528	56765	45388	34479	81383	55056	56846	47086	40967	81110.1	57887.8	54586.6	45977.6	40324	1	0.797076	0.829776	0.66347	0.504005	1.18565	0.846189	0.797933	0.672088	0.589446	0.185646	0.0491129	-0.0318432	0.00861822	0.0854406	0.296975	YES
Q14289	Protein-tyrosine kinase 2-beta	PTK2B	650990	569070	524790	384530	323800	675550	572560	577340	459250	366300	673284	602010	554393	448439	360551	1	0.874161	0.806141	0.590685	0.497396	1.03425	0.92476	0.851615	0.688857	0.55385	0.0342469	0.0505994	0.045474	0.0981721	0.0564535	0.284946	YES
P45984	Mitogen-activated protein kinase 9	MAPK9	248780	215970	190680	116760	74622	258520	214410	202490	155730	88415	257653	225438	194442	152064	87027.3	1	0.868116	0.76646	0.46933	0.299952	1.03567	0.906175	0.781582	0.611239	0.349816	0.035666	0.0380586	0.0151212	0.141909	0.0498644	0.280619	YES
Q02750	Dual specificity mitogen-activated protein kinase kinase 1	MAP2K1	361560	326450	304730	218810	196500	339150	329200	319740	257040	270840	338013	346132	307032	250989	266589	1	0.902893	0.84282	0.605183	0.543478	0.934873	0.957331	0.849186	0.694184	0.73733	-0.0651273	0.0544376	0.00636589	0.0890009	0.193852	0.278529	YES
Q9UKE5	TRAF2 and NCK-interacting protein kinase	TNIK	420240	357680	274900	203870	185180	382950	366760	341560	250170	222400	381666	385624	327984	244281	218909	1	0.851133	0.65415	0.485128	0.440653	0.908209	0.917629	0.780469	0.581289	0.520915	-0.0917911	0.0664962	0.126319	0.0961614	0.0802619	0.277448	YES
Q9NYV4	Cyclin-dependent kinase 12	CDK12	554270	466960	445200	306740	249040	548640	440300	484740	374130	335110	546800	462947	465474	365323	329850	1	0.842477	0.803219	0.553413	0.449312	0.986523	0.835237	0.839796	0.659106	0.595107	-0.0134772	-0.00724034	0.0365771	0.105694	0.145796	0.267349	YES
Q86Y07	Serine/threonine-protein kinase VRK2	VRK2	51446	45844	41188	30313	25215	51320	44736	45332	36408	29975	51147.9	47037	43530.2	35550.9	29504.5	1	0.891109	0.800606	0.58922	0.490126	0.994205	0.914299	0.846135	0.691034	0.573505	-0.00579467	0.0231894	0.0455281	0.101814	0.0833791	0.248116	YES
Q8TD19	Serine/threonine-protein kinase Nek9	NEK9	669150	588920	535970	379160	283090	664490	575110	587230	453770	352050	662261	604691	563890	443088	346524	1	0.880102	0.800971	0.566629	0.423059	0.989706	0.90367	0.842696	0.662165	0.517857	-0.0102944	0.0235685	0.0417246	0.0955362	0.0947984	0.245333	YES
P21127	Cyclin-dependent kinase 11B	CDK11B	572730	453470	402960	339890	319150	648290	442670	435980	373120	324760	646116	465439	418652	364337	319663	1	0.791769	0.703578	0.593456	0.557243	1.12813	0.812667	0.730975	0.63614	0.558138	0.128133	0.0208978	0.0273979	0.0426843	0.000895115	0.220008	YES
Q9UHY1	Nuclear receptor-binding protein	NRBP1	279350	245850	234400	165920	140080	305440	241090	259710	178170	147360	304416	253491	249388	173976	145047	1	0.880079	0.839091	0.59395	0.50145	1.08973	0.90743	0.892742	0.622788	0.519231	0.0897284	0.027351	0.0536517	0.0288376	0.0177808	0.21735	YES
O14965	Aurora kinase A	AURKA	153980	148950	141200	112750	111880	160490	150770	136920	121270	135510	159952	158525	131478	118415	133383	1	0.967333	0.917002	0.732238	0.726588	1.03878	1.02952	0.853864	0.76903	0.866236	0.0387827	0.0621826	-0.0631381	0.0367921	0.139648	0.214268	YES
Q9BUB5	MAP kinase-interacting serine/threonine-protein kinase 1	MKNK1	64373	56242	47088	41537	36985	71672	55171	53725	44509	35768	71431.6	58008.7	51589.7	43461.2	35206.6	1	0.873689	0.731487	0.645255	0.574542	1.10965	0.901134	0.801418	0.675147	0.546916	0.109652	0.0274452	0.0699308	0.029892	-0.0276266	0.209293	YES
Q15118	[Pyruvate dehydrogenase (acetyl-transferring)] kinase isozyme 1, mitochondrial	PDK1	23138	21339	18351	15191	12623	26332	20329	21071	15576	12338	26243.7	21374.6	20233.5	15209.3	12144.3	1	0.922249	0.793111	0.656539	0.545553	1.13422	0.923789	0.874471	0.657331	0.524866	0.134225	0.00153969	0.0813603	0.00079235	-0.0206869	0.19723	YES
Q13546	Receptor-interacting serine/threonine-protein kinase 1	RIPK1	453900	381050	287990	172950	144350	465020	355740	347940	205720	159040	463460	374038	334111	200877	156544	1	0.839502	0.634479	0.381031	0.318022	1.02106	0.824053	0.736089	0.442558	0.344886	0.0210629	-0.0154493	0.10161	0.0615273	0.0268644	0.195615	YES
Q16644	MAP kinase-activated protein kinase 3	MAPKAPK3	157840	128850	105820	71689	64105	159810	126260	118140	89271	66299	159274	132754	113444	87169.5	65258.4	1	0.816333	0.670426	0.454188	0.406139	1.00909	0.841068	0.71873	0.552265	0.413446	0.00908542	0.0247352	0.0483048	0.0980773	0.00730733	0.18751	YES
P27361	Mitogen-activated protein kinase 3	MAPK3	195080	174920	164660	140030	111960	196350	174060	180390	144190	131340	195691	183013	173220	140796	129279	1	0.896658	0.844064	0.717808	0.573918	1.00313	0.938142	0.887945	0.721733	0.662695	0.0031346	0.0414845	0.0438807	0.00392504	0.0887765	0.181201	YES
Q9Y6R4	Mitogen-activated protein kinase kinase kinase 4	MAP3K4	267290	207560	158380	93674	73040	291900	202170	171520	105070	77230	290921	212569	164703	102597	76017.8	1	0.776535	0.59254	0.350458	0.273261	1.08841	0.795273	0.616195	0.38384	0.284402	0.0884098	0.0187386	0.0236552	0.0333817	0.0111408	0.175326	YES
P41743	Protein kinase C iota type	PRKCI	296480	223460	185230	134420	107280	318560	209410	206150	156910	109800	317492	220181	197956	153216	108077	1	0.75371	0.624764	0.453386	0.361846	1.07087	0.742651	0.667689	0.516784	0.364533	0.0708703	-0.0110596	0.0429249	0.0633981	0.00268689	0.168821	YES
Q15208	Serine/threonine-protein kinase 38	STK38	191340	159890	123150	79567	69859	189260	158770	137690	99148	71699	188625	166936	132217	96814	70573.6	1	0.835633	0.643619	0.415841	0.365104	0.985812	0.872459	0.691008	0.505979	0.368839	-0.014188	0.0368264	0.0473889	0.090138	0.00373488	0.1639	YES
P50613	Cyclin-dependent kinase 7	CDK7	279570	247470	232690	164420	127250	282420	239560	248900	181080	149030	281473	251882	239007	176817	146691	1	0.885181	0.832314	0.588117	0.455163	1.00681	0.900961	0.85491	0.632462	0.524702	0.00680632	0.0157807	0.0225963	0.0443441	0.0695385	0.159066	YES
Q96RR4	Calcium/calmodulin-dependent protein kinase kinase 2	CAMKK2	74415	56588	45751	68595	28626	77388	62615	58335	43895	44431	77128.5	65835.6	56016.4	42861.7	43733.6	1	0.760438	0.614809	0.92179	0.384681	1.03646	0.884709	0.752757	0.575982	0.587699	0.0364639	0.124271	0.137948	-0.345808	0.203019	0.155893	YES
O43318	Mitogen-activated protein kinase kinase kinase 7	MAP3K7	288410	256450	243980	190620	173150	301790	248570	248490	209890	193810	300778	261355	238614	204949	190768	1	0.889186	0.845948	0.660934	0.600361	1.04288	0.906193	0.827341	0.710617	0.661447	0.042883	0.0170079	-0.018607	0.049683	0.0610867	0.152054	YES
Q13177	Serine/threonine-protein kinase PAK 2;PAK-2p27;PAK-2p34	PAK2	1406700	1235500	1242700	1010300	1032800	1485800	1201600	1243400	1146200	1097100	1.48082e+06	1.2634e+06	1.19398e+06	1.11922e+06	1.07988e+06	1	0.878297	0.883415	0.718206	0.734201	1.05269	0.898134	0.848781	0.795634	0.767669	0.0526886	0.0198368	-0.0346343	0.0774279	0.0334686	0.148788	YES
P15056	Serine/threonine-protein kinase B-raf	BRAF	65602	56945	52137	36883	35787	68009	55184	53914	44001	36762	67780.9	58022.4	51771.1	42965.2	36185	1	0.868038	0.794747	0.562224	0.545517	1.03321	0.884461	0.78917	0.654937	0.551584	0.0332142	0.0164232	-0.00557695	0.0927136	0.0060668	0.142841	YES
Q9UKI8	Serine/threonine-protein kinase tousled-like 1	TLK1	176900	112990	56885	46227	31439	132920	92966	106420	68406	50636	132474	97747.7	102190	66795.7	49841.2	1	0.638722	0.321566	0.261317	0.177722	0.748865	0.552559	0.577672	0.37759	0.281748	-0.251135	-0.0861633	0.256107	0.116273	0.104026	0.139107	YES
Q86UE8	Serine/threonine-protein kinase tousled-like 2	TLK2	133970	105990	77136	56544	52447	108290	91130	94053	81173	68171	107927	95817.3	90314.8	79262.1	67101	1	0.791147	0.575771	0.422065	0.391483	0.805604	0.715214	0.674142	0.591641	0.500866	-0.194396	-0.0759328	0.0983711	0.169576	0.109383	0.107002	YES
O95819	Mitogen-activated protein kinase kinase kinase kinase 4	MAP4K4	126230	107470	104280	90505	77342	129500	109120	111270	92036	79652	129066	114733	106847	89869.4	78401.8	1	0.851382	0.826111	0.716985	0.612707	1.02246	0.908917	0.846451	0.71195	0.621103	0.0224645	0.0575347	0.0203397	-0.00503503	0.00839582	0.1037	YES
O60566	Mitotic checkpoint serine/threonine-protein kinase BUB1 beta	BUB1B	728970	635320	646050	542620	430790	767870	615360	675860	548110	469360	765295	647011	648997	535207	461993	1	0.871531	0.88625	0.744365	0.590957	1.04983	0.887569	0.890294	0.734197	0.633761	0.0498303	0.0160379	0.00404317	-0.0101688	0.0428043	0.102547	YES
P19784	Casein kinase II subunit alpha	CSNK2A2	867600	803530	741470	495820	377930	821590	777690	785850	570360	430050	818835	817691	754616	556933	423300	1	0.926153	0.854622	0.571485	0.435604	0.943793	0.942474	0.869774	0.641924	0.487898	-0.0562072	0.0163216	0.0151518	0.0704397	0.0522937	0.0979996	YES
P49137	MAP kinase-activated protein kinase 2	MAPKAPK2	488660	413100	377670	299920	281120	491280	394770	400230	329310	301640	489632	415075	384323	321558	296906	1	0.845373	0.772869	0.61376	0.575288	1.00199	0.849415	0.786482	0.65804	0.607591	0.00198991	0.00404178	0.0136138	0.04428	0.0323037	0.0962292	YES
P35626	Beta-adrenergic receptor kinase 2	ADRBK2	7040.9	6390.6	6169.3	5371.1	4702.1	7100.1	6473.7	7248.4	5354	4347.8	7076.29	6806.68	6960.31	5227.96	4279.56	1	0.90764	0.876209	0.762843	0.667827	1.00503	0.966734	0.988553	0.742514	0.607814	0.0050261	0.0590941	0.112344	-0.0203292	-0.0600125	0.096123	YES
O00418	Eukaryotic elongation factor 2 kinase	EEF2K	210450	195570	181130	138700	132780	221030	191990	180020	157750	131120	220289	201865	172865	154036	129062	1	0.929294	0.860679	0.659064	0.630934	1.04675	0.959207	0.821406	0.731939	0.613267	0.0467509	0.0299123	-0.0392732	0.0728747	-0.017667	0.0925977	YES
Q96QT4	Transient receptor potential cation channel subfamily M member 7	TRPM7	5502.2	4642.7	4600.6	4376.4	3881.7	5596.8	5093.2	4589.7	4413.2	3875.5	5578.03	5355.17	4407.28	4309.31	3814.67	1	0.84379	0.836138	0.795391	0.705481	1.01378	0.973278	0.801003	0.783198	0.693299	0.0137817	0.129488	-0.0351353	-0.0121931	-0.0121822	0.0837593	YES
P45985	Dual specificity mitogen-activated protein kinase kinase 4	MAP2K4	180990	161490	122130	100760	81392	172030	158630	139050	104220	89775	171453	166789	133523	101767	88365.9	1	0.892259	0.674789	0.556716	0.449704	0.947307	0.921538	0.737739	0.562278	0.488236	-0.0526932	0.0292787	0.0629501	0.00556169	0.0385321	0.0836294	YES
Q13131	5-AMP-activated protein kinase catalytic subunit alpha-1	PRKAA1	457410	358090	209470	106730	84237	440330	314130	272820	133090	90425	438853	330287	261977	129957	89005.7	1	0.782864	0.457948	0.233336	0.184161	0.959431	0.722082	0.572739	0.284115	0.194586	-0.0405692	-0.0607828	0.114791	0.0507794	0.0104255	0.0746438	YES
Q96S44	TP53-regulating kinase	TP53RK	398180	322950	286590	201670	159800	410130	302580	299820	225840	165820	408755	318143	287903	220524	163217	1	0.811065	0.71975	0.506479	0.401326	1.02656	0.798994	0.723048	0.553829	0.409908	0.0265572	-0.0120718	0.00329848	0.0473495	0.00858239	0.0737157	YES
Q04759	Protein kinase C theta type	PRKCQ	78268	60061	33592	25395	18535	57089	48104	49307	35721	32400	56897.5	50578.2	47347.2	34880.1	31891.5	1	0.767376	0.429192	0.324462	0.236815	0.726958	0.646219	0.604938	0.44565	0.407465	-0.273042	-0.121158	0.175746	0.121188	0.17065	0.0733837	YES
Q9Y4A5	Transformation/transcription domain-associated protein	TRRAP	115540	95353	86789	74121	60969	127690	89645	87759	68212	69395	127262	94255.9	84270.9	66606.3	68305.8	1	0.825281	0.75116	0.641518	0.527687	1.10145	0.815786	0.729366	0.576478	0.591187	0.101452	-0.00949537	-0.0217938	-0.0650402	0.0635001	0.0686227	YES
Q8N4C8	Misshapen-like kinase 1	MINK1	109730	94572	81824	69082	60397	114920	93429	86603	67469	62239	114535	98234.5	83160.9	65880.7	61262.1	1	0.861861	0.745685	0.629563	0.550415	1.04379	0.895239	0.757868	0.60039	0.558299	0.0437856	0.0333777	0.0121834	-0.0291739	0.00788403	0.0680568	YES
Q96S38	Ribosomal protein S6 kinase delta-1	RPS6KC1	89302	78777	73145	61844	47929	94919	74844	75772	63016	49681	94600.7	78693.6	72760.4	61532.6	48901.2	1	0.882141	0.819075	0.692526	0.536707	1.05933	0.881208	0.814768	0.689039	0.547594	0.0593343	-0.000933766	-0.00430701	-0.00348735	0.0108869	0.061493	YES
Q9H4A3	Serine/threonine-protein kinase WNK1	WNK1	931660	828480	787020	628920	598610	940170	799410	800190	682110	627940	937017	840528	768386	666053	618084	1	0.889251	0.84475	0.675053	0.64252	1.00575	0.902183	0.824749	0.71491	0.663422	0.00574989	0.0129315	-0.0200011	0.0398566	0.0209025	0.0594394	YES
Q13308	Inactive tyrosine-protein kinase 7	PTK7	120470	105600	105340	93910	72941	131850	105520	110200	88495	71635	131408	110947	105820	86411.8	70510.6	1	0.876567	0.874409	0.77953	0.60547	1.09079	0.920955	0.878393	0.717289	0.585296	0.0907928	0.0443881	0.00398443	-0.0622413	-0.020174	0.05675	YES
P30291	Wee1-like protein kinase	WEE1	33270	27081	27832	26737	22924	41278	23986	29002	25526	20844	41139.6	25219.7	27849.3	24925.1	20516.8	1	0.813977	0.836549	0.803637	0.689029	1.23654	0.758032	0.837069	0.749177	0.616677	0.236536	-0.0559446	0.000519689	-0.0544603	-0.0723523	0.0542989	YES
Q8IWU2	Serine/threonine-protein kinase LMTK2	LMTK2	78104	65190	64039	48917	44165	78894	63861	68144	52295	42760	78629.4	67145.7	65435.6	51064	42088.9	1	0.834656	0.81992	0.626306	0.565464	1.00673	0.859696	0.8378	0.653794	0.538882	0.00672708	0.0250397	0.0178807	0.0274884	-0.0265819	0.050554	YES
P07947	Tyrosine-protein kinase Yes;Proto-oncogene tyrosine-protein kinase Src;Tyrosine-protein kinase Fyn	YES1;SRC;FYN	208140	186120	147640	115090	91952	196380	176650	162340	116510	109920	195721	185736	155888	113767	108195	1	0.894206	0.70933	0.552945	0.44178	0.940335	0.892361	0.748956	0.54659	0.519817	-0.0596647	-0.00184481	0.0396255	-0.00635487	0.0780375	0.0497987	YES
Q14004	Cyclin-dependent kinase 13	CDK13	99435	86377	81812	70696	62843	113380	79159	81457	70374	63075	113000	83230.6	78219.4	68717.4	62085	1	0.868678	0.822769	0.710977	0.632001	1.13642	0.837035	0.786639	0.691078	0.624378	0.136418	-0.0316432	-0.0361299	-0.0198988	-0.00762314	0.0411232	YES
Q13523	Serine/threonine-protein kinase PRP4 homolog	PRPF4B	271930	212490	183380	124630	97294	253350	200390	190890	150080	108750	252500	210697	183303	146547	107043	1	0.781414	0.674365	0.458316	0.357791	0.928549	0.774821	0.674081	0.538915	0.393642	-0.071451	-0.00659327	-0.000283495	0.0805981	0.0358515	0.0381218	YES
P53004	Biliverdin reductase A	BLVRA	1168300	1060100	1044000	812380	868140	1148500	1023600	1021500	898760	930630	1.14465e+06	1.07625e+06	980900	877603	916023	1	0.907387	0.893606	0.695352	0.74308	0.979755	0.921209	0.839596	0.751179	0.784065	-0.0202446	0.0138227	-0.0540105	0.0558271	0.0409853	0.03638	YES
O75116	Rho-associated protein kinase 2	ROCK2	3044800	2627300	2624100	1877200	858300	3064800	2516800	2673600	2119500	790760	3.05452e+06	2.64625e+06	2.56734e+06	2.06961e+06	778348	1	0.862881	0.86183	0.616527	0.28189	1.00319	0.869105	0.843187	0.679718	0.255632	0.00319283	0.00622438	-0.0186431	0.0631917	-0.0262584	0.0277074	YES
Q15831	Serine/threonine-protein kinase STK11	STK11	27673	20722	19711	16368	12276	26075	20151	24028	16835	10862	25987.6	21187.5	23073	16438.7	10691.5	1	0.748817	0.712283	0.591479	0.443609	0.939094	0.765637	0.833772	0.594034	0.386352	-0.0609059	0.0168204	0.12149	0.00255469	-0.0572575	0.0227014	YES
Q00536	Cyclin-dependent kinase 16;Cyclin-dependent kinase 18;Cyclin-dependent kinase 17	CDK16;CDK18;CDK17	24682	22154	17888	15592	14530	24811	19411	20696	15404	15475	24727.8	20409.4	19873.4	15041.4	15232.1	1	0.897577	0.724739	0.631715	0.588688	1.00186	0.826894	0.805179	0.609407	0.617134	0.00185524	-0.0706828	0.08044	-0.0223085	0.0284462	0.0177502	YES
Q13263	Transcription intermediary factor 1-beta	TRIM28	2470900	2149700	1694800	767360	563020	2445500	2000800	1785400	872520	589850	2.4373e+06	2.10371e+06	1.71444e+06	851980	580592	1	0.870007	0.685904	0.310559	0.22786	0.986401	0.851395	0.693852	0.344806	0.234972	-0.0135989	-0.0186121	0.00794759	0.0342468	0.00711153	0.017095	YES
Q16539	Mitogen-activated protein kinase 14	MAPK14	612120	386120	168200	120100	101080	615570	361340	195030	112840	108190	613506	379926	187278	110184	106492	1	0.630791	0.274783	0.196203	0.165131	1.00226	0.620672	0.30595	0.180003	0.173972	0.00226353	-0.0101196	0.0311677	-0.0161999	0.00884121	0.0159529	YES
P25440	Bromodomain-containing protein 2	BRD2	218480	196990	158790	106300	96974	227400	187790	165400	109580	91946	226637	197449	158826	107000	90502.8	1	0.901639	0.726794	0.486543	0.443858	1.03734	0.90374	0.726959	0.489749	0.414239	0.0373369	0.00210092	0.00016492	0.00320594	-0.029619	0.0131897	YES
P48730	Casein kinase I isoform delta	CSNK1D	9901.5	9113.1	9668.3	8939.2	8643.7	10113	8156.7	9795.7	9175.6	9479.7	10079.1	8576.24	9406.36	8959.6	9330.91	1	0.920376	0.976448	0.902813	0.872969	1.01794	0.866156	0.949994	0.904873	0.942373	0.017935	-0.05422	-0.0264544	0.00206049	0.0694046	0.0087257	YES
P68400	Casein kinase II subunit alpha;Casein kinase II subunit alpha 3	CSNK2A1;CSNK2A3	639040	538670	544700	399150	315460	615250	509290	567530	436110	327560	613187	535485	544973	425844	322419	1	0.842936	0.852372	0.624609	0.493647	0.959543	0.837953	0.8528	0.66638	0.504536	-0.0404566	-0.0049834	0.000427237	0.0417717	0.0108893	0.00764824	YES
Q13464	Rho-associated protein kinase 1	ROCK1	2071400	1841400	1810700	1127000	513860	2081400	1792500	1852200	1183200	492460	2.07442e+06	1.8847e+06	1.77858e+06	1.15535e+06	484730	1	0.888964	0.874143	0.544076	0.248074	1.00146	0.909867	0.858638	0.557761	0.234011	0.00145775	0.0209025	-0.0155051	0.0136849	-0.0140627	0.00647734	YES
Q16513	Serine/threonine-protein kinase N2	PKN2	56225	52480	40867	37155	26315	63841	42686	37986	38448	31363	63626.9	44881.6	36476.2	37542.9	30870.7	1	0.933393	0.726847	0.660827	0.46803	1.13165	0.798249	0.648754	0.667726	0.549057	0.131648	-0.135143	-0.0780931	0.00689934	0.0810269	0.0063374	YES
O75962	Triple functional domain protein	TRIO	33161	24019	19564	12370	10024	33930	22972	20086	11855	10134	33816.2	24153.6	19287.7	11575.9	9974.94	1	0.724315	0.58997	0.373029	0.302283	1.01976	0.728373	0.581637	0.349083	0.300803	0.0197584	0.00405803	-0.00833315	-0.023946	-0.00147946	-0.00994215	YES
Q58A45	PAB-dependent poly(A)-specific ribonuclease subunit PAN3	PAN3	19999	17301	16824	16139	15247	20509	16597	18652	15452	14619	20440.2	17450.7	17910.7	15088.3	14389.5	1	0.865093	0.841242	0.80699	0.762388	1.02206	0.872577	0.895578	0.75445	0.719513	0.022062	0.00748384	0.0543357	-0.05254	-0.0428749	-0.0115333	YES
Q9Y6M4	Casein kinase I isoform gamma-3;Casein kinase I isoform gamma-2	CSNK1G3;CSNK1G2	21806	20549	17648	14710	11732	21887	17655	19923	14361	12844	21813.6	18563.1	19131.1	14022.9	12642.4	1	0.942355	0.809319	0.674585	0.538017	1.00035	0.851283	0.877334	0.643077	0.579767	0.000348402	-0.0910718	0.0680154	-0.0315081	0.0417502	-0.012466	YES
Q9Y3S1	Serine/threonine-protein kinase WNK2	WNK2	160080	138120	129050	120870	93244	173140	131600	136200	105890	95215	172559	138369	130787	103397	93720.5	1	0.862819	0.806159	0.75506	0.582484	1.07796	0.864373	0.817008	0.64591	0.585461	0.0779569	0.00155464	0.0108484	-0.10915	0.00297684	-0.0158131	YES
Q8TDX7	Serine/threonine-protein kinase Nek7	NEK7	138930	109110	80808	57824	48124	128340	104100	92496	59035	49200	127910	109454	88819.7	57645.3	48427.8	1	0.78536	0.581645	0.41621	0.34639	0.920676	0.787838	0.639312	0.414923	0.348577	-0.0793235	0.00247894	0.0576669	-0.00128635	0.0021865	-0.0182775	YES
Q9UBS0	Ribosomal protein S6 kinase beta-2	RPS6KB2	10956	7228	3623	2512.3	2271.3	12540	5387.6	3671.4	2794.4	1977.6	12497.9	5664.71	3525.48	2728.62	1946.56	1	0.65973	0.330686	0.229308	0.207311	1.14074	0.517042	0.321785	0.249052	0.177671	0.14074	-0.142688	-0.00890133	0.0197443	-0.0296404	-0.0207455	YES
Q8WZ42	Titin	TTN	126540	104730	120330	111290	98989	152920	93461	112980	115560	88329	152407	98268.2	108490	112840	86942.6	1	0.827643	0.950925	0.879485	0.782274	1.20442	0.776578	0.857353	0.891731	0.687076	0.204419	-0.0510654	-0.0935711	0.0122464	-0.0951983	-0.0231696	YES
P11274	Breakpoint cluster region protein	BCR	284370	232280	205590	165580	152900	287900	213080	208010	169780	160130	286934	224040	199742	165783	157617	1	0.816823	0.722967	0.58227	0.53768	1.00902	0.787846	0.702403	0.582984	0.554266	0.00901806	-0.028977	-0.0205631	0.000714901	0.0165863	-0.0232209	YES
Q9NYL2	Mitogen-activated protein kinase kinase kinase MLT	ZAK	359300	310760	261060	178500	124250	360350	280780	251550	199150	133380	359141	295222	241552	194462	131287	1	0.864904	0.726579	0.496799	0.345811	0.999559	0.821659	0.672285	0.541224	0.365395	-0.000441166	-0.0432453	-0.0542947	0.044425	0.0195839	-0.0339722	YES
O60885	Bromodomain-containing protein 4	BRD4	796890	728280	706330	570830	474990	758250	706580	729010	565030	507470	755707	742923	700035	551729	499505	1	0.913903	0.886358	0.716322	0.596055	0.94832	0.932278	0.878459	0.692353	0.626818	-0.0516796	0.0183752	-0.00789964	-0.0239695	0.0307632	-0.0344103	YES
P10398	Serine/threonine-protein kinase A-Raf	ARAF	249080	213340	180050	138910	127910	259150	188200	186310	151940	118950	258281	197880	178905	148363	117083	1	0.856512	0.72286	0.557692	0.51353	1.03694	0.794444	0.718263	0.595645	0.470062	0.0369395	-0.062068	-0.00459714	0.0379527	-0.043468	-0.035241	YES
P49674	Casein kinase I isoform epsilon	CSNK1E	43737	36367	36504	25773	21839	44345	33711	33694	26357	25176	44196.3	35444.9	32354.8	25736.5	24780.8	1	0.831493	0.834625	0.589272	0.499326	1.0105	0.810411	0.739758	0.588439	0.566588	0.0105009	-0.0210821	-0.094867	-0.000833541	0.0672621	-0.0390196	YES
Q13418	Integrin-linked protein kinase	ILK	360640	305550	194510	91820	84120	350530	283210	219610	95674	70817	349354	297777	210881	93421.8	69705.5	1	0.847244	0.539347	0.254603	0.233252	0.968707	0.82569	0.584742	0.259044	0.193283	-0.0312932	-0.0215535	0.0453954	0.00444151	-0.0399693	-0.042979	YES
Q9UPN9	E3 ubiquitin-protein ligase TRIM33	TRIM33	759350	622670	501520	242540	183170	746100	568110	513600	265940	185270	743598	597331	493187	259680	182362	1	0.820004	0.66046	0.319405	0.241219	0.979256	0.786634	0.649485	0.341976	0.240155	-0.0207443	-0.0333696	-0.0109745	0.0225715	-0.001064	-0.0435809	YES
Q7Z7A4	PX domain-containing protein kinase-like protein	PXK	106220	90555	97613	81220	68003	106880	88076	102860	75395	68309	106522	92606.2	98771.7	73620.2	67236.8	1	0.852523	0.91897	0.764639	0.640209	1.00284	0.871834	0.929879	0.693091	0.632996	0.00283897	0.0193109	0.0109089	-0.0715481	-0.00721294	-0.0457023	YES
P42345	Serine/threonine-protein kinase mTOR	MTOR	740670	647570	476820	291950	225960	748270	591260	533110	253880	221610	745761	621672	511921	247904	218132	1	0.874303	0.643768	0.39417	0.305075	1.00687	0.839337	0.691159	0.334702	0.294506	0.00687285	-0.0349662	0.047391	-0.0594684	-0.0105693	-0.0507401	YES
Q01974	Tyrosine-protein kinase transmembrane receptor ROR2	ROR2	34109	31836	33301	25961	22418	32555	32321	33832	26094	21826	32445.8	33983.4	32487.3	25479.7	21483.4	1	0.933361	0.976311	0.761119	0.657246	0.951239	0.996319	0.952456	0.747009	0.629846	-0.0487607	0.062958	-0.0238554	-0.0141096	-0.0273997	-0.0511674	YES
O15021	Microtubule-associated serine/threonine-protein kinase 4	MAST4	88700	80857	78168	68572	62689	88296	74461	74909	71165	67284	87999.9	78290.9	71931.7	69489.7	66227.9	1	0.911578	0.881263	0.773078	0.706753	0.992107	0.882648	0.810955	0.783424	0.746651	-0.00789312	-0.02893	-0.070308	0.0103466	0.0398977	-0.0568868	YES
Q8TEA7	TBC domain-containing protein kinase-like protein	TBCK	11935	10408	8320.6	3978.1	2990.6	11602	10035	8719.1	3662.3	2920.8	11563.1	10551.2	8372.55	3576.09	2874.96	1	0.872057	0.69716	0.333314	0.250574	0.968839	0.884051	0.701513	0.29963	0.240884	-0.0311613	0.0119943	0.00435289	-0.0336835	-0.00968949	-0.0581871	YES
Q96KB5	Lymphokine-activated killer T-cell-originated protein kinase	PBK	640000	570910	436570	222130	160790	616150	532640	469840	226230	146880	614084	560036	451166	220904	144575	1	0.892047	0.682141	0.347078	0.251234	0.959506	0.875057	0.704947	0.345163	0.225898	-0.0404944	-0.01699	0.0228059	-0.00191494	-0.0253365	-0.0619299	YES
Q8IVT5	Kinase suppressor of Ras 1	KSR1	173830	151640	139230	119230	110530	165360	144570	142750	115350	118770	164805	152006	137076	112635	116906	1	0.872347	0.800955	0.6859	0.635851	0.948084	0.874452	0.788565	0.647958	0.67253	-0.0519161	0.00210539	-0.0123898	-0.0379416	0.0366785	-0.0634637	YES
Q05397	Focal adhesion kinase 1	PTK2	378840	335490	324220	250030	222070	370270	307340	319990	254110	236000	369028	323148	307272	248128	232296	1	0.885572	0.855823	0.659988	0.586184	0.9741	0.852994	0.811086	0.654968	0.613177	-0.0258995	-0.0325782	-0.0447373	-0.00502025	0.0269924	-0.0812429	YES
Q15059	Bromodomain-containing protein 3	BRD3	151880	133260	121580	89732	70289	148540	121250	124580	89911	71021	148042	127487	119628	87794.5	69906.3	1	0.877403	0.8005	0.590809	0.462793	0.974729	0.83939	0.787651	0.578051	0.460273	-0.025271	-0.0380135	-0.0128492	-0.0127571	-0.00251992	-0.0914107	YES
P17612	cAMP-dependent protein kinase catalytic subunit alpha	PRKACA	523560	466120	460400	444990	327730	530590	430510	479810	393850	348880	528811	452653	460740	384579	343404	1	0.89029	0.879364	0.849931	0.625965	1.01003	0.864568	0.880013	0.734545	0.655902	0.0100286	-0.0257213	0.000648503	-0.115386	0.0299375	-0.100493	YES
P48729	Casein kinase I isoform alpha;Casein kinase I isoform alpha-like	CSNK1A1;CSNK1A1L	262520	225770	200130	133210	109250	253740	197260	200280	146470	109750	252889	207406	192320	143022	108027	1	0.860011	0.762342	0.507428	0.416159	0.963313	0.790058	0.732591	0.544804	0.411502	-0.0366866	-0.0699524	-0.0297513	0.0373763	-0.00465719	-0.103671	YES
Q6P3W7	SCY1-like protein 2	SCYL2	461350	416380	415960	333130	288700	415110	396790	420140	328810	309880	413718	417199	403441	321070	305016	1	0.902525	0.901615	0.722077	0.625772	0.896755	0.9043	0.87448	0.695935	0.661138	-0.103245	0.00177513	-0.0271352	-0.0261414	0.0353662	-0.11938	YES
P28482	Mitogen-activated protein kinase 1	MAPK1	1126400	983560	963060	766390	753780	1056800	917990	941260	811970	754090	1.05326e+06	965207	903849	792856	742254	1	0.873189	0.854989	0.680389	0.669194	0.935064	0.856895	0.802423	0.703885	0.658961	-0.0649363	-0.0162935	-0.0525668	0.0234959	-0.0102326	-0.120533	YES
P43405	Tyrosine-protein kinase SYK	SYK	22727	18956	14474	14647	11118	21806	17356	14126	14175	11885	21732.9	18248.7	13564.5	13841.3	11698.5	1	0.834074	0.636864	0.644476	0.489198	0.956258	0.802953	0.596847	0.609025	0.514738	-0.0437423	-0.0311212	-0.0400163	-0.0354506	0.0255404	-0.12479	YES
P78362	SRSF protein kinase 2;SRSF protein kinase 2 N-terminal;SRSF protein kinase 2 C-terminal	SRPK2	28440	22664	18789	11912	8826.7	28334	17482	19445	13396	8844.4	28239	18381.2	18672.1	13080.7	8705.58	1	0.796906	0.660654	0.418847	0.310362	0.992932	0.646315	0.656545	0.459939	0.306103	-0.00706836	-0.150591	-0.00410895	0.0410918	-0.00425876	-0.124935	YES
Q96J92	Serine/threonine-protein kinase WNK4	WNK4	128930	91846	75808	65530	53176	124320	80091	79809	62016	54122	123903	84210.5	76636.9	60556.1	53272.5	1	0.712371	0.587978	0.50826	0.412441	0.96101	0.653149	0.594407	0.469682	0.413189	-0.0389896	-0.0592221	0.00642923	-0.0385782	0.000748596	-0.129612	YES
Q96Q15	Serine/threonine-protein kinase SMG1	SMG1	90167	73562	35016	31780	24216	87901	64432	42391	25894	21962	87606.2	67746.1	40706.1	25284.4	21617.3	1	0.815842	0.388346	0.352457	0.268568	0.971599	0.75134	0.451453	0.280418	0.239747	-0.0284006	-0.0645018	0.0631066	-0.0720392	-0.0288211	-0.130656	YES
Q9BRS2	Serine/threonine-protein kinase RIO1	RIOK1	313800	202490	120890	98770	86357	304650	169900	130250	95728	81364	303628	178639	125073	93474.5	80086.9	1	0.645284	0.385245	0.314755	0.275198	0.967585	0.569276	0.398576	0.297879	0.255216	-0.0324146	-0.0760075	0.0133305	-0.0168753	-0.0199811	-0.131948	YES
Q96GD4	Aurora kinase B	AURKB	22914	18367	19601	16387	12430	22591	15879	19831	14651	14292	22515.2	16695.7	19042.8	14306.1	14067.7	1	0.801562	0.855416	0.715152	0.542463	0.982597	0.728626	0.831055	0.624339	0.613934	-0.0174026	-0.0729362	-0.0243607	-0.0908131	0.0714706	-0.134042	YES
Q96KG9	N-terminal kinase-like protein	SCYL1	334680	310690	276310	196780	127020	297980	300720	295190	182560	124140	296981	316188	283457	178262	122192	1	0.92832	0.825595	0.587965	0.379527	0.887357	0.944746	0.846951	0.532635	0.3651	-0.112643	0.0164264	0.021356	-0.0553291	-0.0144271	-0.144617	YES
O14578	Citron Rho-interacting kinase	CIT	253280	188740	111370	83771	66700	238040	158870	130780	77784	62232	237242	167042	125582	75952.9	61255.2	1	0.745183	0.439711	0.330745	0.263345	0.936678	0.659513	0.495823	0.299877	0.241848	-0.0633225	-0.08567	0.0561119	-0.0308673	-0.0214971	-0.145245	YES
Q99570	Phosphoinositide 3-kinase regulatory subunit 4	PIK3R4	173650	144810	118720	72767	57091	169280	128000	119200	72151	52496	168712	134584	114462	70452.5	51672	1	0.833919	0.683674	0.419044	0.328771	0.971565	0.775029	0.659155	0.405716	0.297564	-0.0284349	-0.0588903	-0.0245189	-0.0133284	-0.0312062	-0.156379	YES
O15164	Transcription intermediary factor 1-alpha	TRIM24	151150	127680	82269	52522	42004	144900	108960	83472	52380	41883	144414	114564	80154.3	51146.9	41225.6	1	0.844724	0.544287	0.347483	0.277896	0.955435	0.757952	0.530297	0.338385	0.272746	-0.0445647	-0.0867722	-0.0139905	-0.00909726	-0.00514974	-0.159574	YES
P78527	DNA-dependent protein kinase catalytic subunit	PRKDC	10811000	9589000	6863000	2292900	1554400	9929800	8064400	7402300	2114700	1521700	9.8965e+06	8.47919e+06	7.10809e+06	2.06492e+06	1.49782e+06	1	0.886967	0.634816	0.21209	0.143779	0.91541	0.784312	0.657487	0.191002	0.138546	-0.0845899	-0.102655	0.0226703	-0.0210879	-0.00523394	-0.190897	YES
Q96SB4	SRSF protein kinase 1	SRPK1	257300	204030	198040	129670	105040	239620	179970	176980	137400	105570	238816	189227	169946	134166	103913	1	0.792965	0.769685	0.503964	0.408239	0.928163	0.735433	0.660497	0.521436	0.403859	-0.0718368	-0.0575329	-0.109189	0.017472	-0.00438009	-0.225466	YES
P31751	RAC-beta serine/threonine-protein kinase	AKT2	302440	262320	250140	202600	155080	288340	239230	245050	182280	147500	287373	251535	235310	177989	145185	1	0.867346	0.827073	0.669885	0.512763	0.950182	0.831685	0.77804	0.58851	0.480045	-0.0498182	-0.0356605	-0.0490336	-0.0813747	-0.0327176	-0.248605	YES
Q9H0K1	Serine/threonine-protein kinase SIK2	SIK2	7730.2	6387.9	5817.2	6833	4634.1	8081.8	5943.4	6104.7	5108	4332.3	8054.7	6249.1	5862.06	4987.76	4264.3	1	0.826356	0.752529	0.883936	0.59948	1.04198	0.808401	0.758333	0.64523	0.551642	0.0419777	-0.0179556	0.00580364	-0.238706	-0.0478382	-0.256718	YES
Q9H2K8	Serine/threonine-protein kinase TAO3	TAOK3	223630	190450	131270	67321	52591	181060	145800	134770	86562	60422	180453	153299	129413	84524.3	59473.6	1	0.85163	0.586996	0.301037	0.23517	0.806926	0.685504	0.578694	0.377965	0.265947	-0.193074	-0.166126	-0.00830189	0.0769275	0.0307769	-0.259798	YES
Q8TD08	Mitogen-activated protein kinase 15	MAPK15	25982	23640	22629	20533	19523	22236	21911	23596	18793	19176	22161.4	23038	22658.2	18350.6	18875	1	0.909861	0.870949	0.790278	0.751405	0.852953	0.886691	0.872071	0.706281	0.726465	-0.147047	-0.0231701	0.00112217	-0.0839965	-0.0249396	-0.278031	YES
Q9Y5P4	Collagen type IV alpha-3-binding protein	COL4A3BP	898380	788940	760300	474130	246310	857860	717110	679170	417200	224610	854983	753995	652176	407379	221085	1	0.878181	0.846301	0.527761	0.274171	0.951694	0.839283	0.725946	0.453459	0.246093	-0.0483059	-0.0388982	-0.120355	-0.0743016	-0.0280788	-0.309939	YES
P31749	RAC-alpha serine/threonine-protein kinase	AKT1	807610	697800	644810	472570	375340	762190	641200	605460	428970	313260	759634	674180	581395	418872	308343	1	0.864031	0.798418	0.585146	0.464754	0.940595	0.834784	0.719896	0.518656	0.381797	-0.0594051	-0.0292465	-0.0785212	-0.0664902	-0.0829569	-0.31662	YES
Q9Y2U5	Mitogen-activated protein kinase kinase kinase 2;Mitogen-activated protein kinase kinase kinase 3	MAP3K2;MAP3K3	9737.7	8596.3	7381.1	6619.1	4688.9	9914.9	7210.6	7260.7	5290.3	4367	9881.65	7581.48	6972.12	5165.76	4298.46	1	0.882785	0.757992	0.67974	0.48152	1.01478	0.77857	0.715992	0.530491	0.441424	0.0147826	-0.104216	-0.0419999	-0.149248	-0.040096	-0.320778	YES
P51812	Ribosomal protein S6 kinase alpha-3	RPS6KA3	1722000	1374300	787450	356730	296210	1303800	944810	808410	516730	381870	1.29943e+06	993406	776279	504566	375876	1	0.798084	0.457288	0.20716	0.172015	0.754604	0.576891	0.450801	0.293012	0.218279	-0.245396	-0.221193	-0.0064872	0.0858513	0.0462638	-0.340961	YES
Q9H792	Pseudopodium-enriched atypical kinase 1	PEAK1	15682	13905	13051	18898	12139	15106	13042	18415	11955	10236	15055.3	13712.8	17683.1	11673.6	10075.3	1	0.886685	0.832228	1.20508	0.774072	0.960039	0.87443	1.1276	0.744393	0.642478	-0.0399605	-0.012255	0.295376	-0.460683	-0.131594	-0.349117	YES
Q9Y5S2	Serine/threonine-protein kinase MRCK beta	CDC42BPB	61246	47690	27184	19567	15112	56329	35000	26453	15449	12388	56140.1	36800.2	25401.6	15085.3	12193.6	1	0.778663	0.443849	0.319482	0.246743	0.916633	0.600859	0.414747	0.246307	0.199092	-0.0833673	-0.177804	-0.0291023	-0.073175	-0.0476511	-0.411099	YES
Q13627	Dual specificity tyrosine-phosphorylation-regulated kinase 1A	DYRK1A	476030	417840	374630	261490	245220	399150	343030	326940	244990	237980	397811	360674	313945	239223	234245	1	0.87776	0.786988	0.549314	0.515136	0.835685	0.75767	0.659508	0.502537	0.49208	-0.164315	-0.120089	-0.12748	-0.0467768	-0.0230558	-0.481717	YES
Q06187	Tyrosine-protein kinase BTK	BTK	1064000	702240	283560	234460	200210	812360	423870	292480	214610	211480	809636	445672	280855	209558	208161	1	0.66	0.266504	0.220357	0.188167	0.760936	0.418864	0.263962	0.196953	0.19564	-0.239064	-0.241136	-0.00254218	-0.0234042	0.00747243	-0.498674	YES
Q05655	Protein kinase C delta type;Protein kinase C delta type regulatory subunit;Protein kinase C delta type catalytic subunit	PRKCD	266460	237640	203810	147660	109630	225310	181660	171950	124660	103060	224554	191004	165116	121725	101442	1	0.891841	0.76488	0.554154	0.411431	0.842732	0.716819	0.619664	0.456824	0.380704	-0.157268	-0.175022	-0.145216	-0.09733	-0.0307273	-0.605563	YES
P23443	Ribosomal protein S6 kinase beta-1	RPS6KB1	308330	269810	232790	161500	115730	267930	210080	197330	124900	91620	267031	220885	189487	121960	90182	1	0.875069	0.755003	0.523789	0.375345	0.866057	0.716393	0.614559	0.39555	0.292485	-0.133943	-0.158676	-0.140444	-0.12824	-0.0828594	-0.644162	YES
Q16512	Serine/threonine-protein kinase N1	PKN1	542500	497760	487500	327800	202560	446070	347090	300990	201370	153750	444574	364943	289027	196630	151337	1	0.91753	0.898618	0.60424	0.373382	0.819491	0.672705	0.532768	0.362451	0.278962	-0.180509	-0.244825	-0.365849	-0.241789	-0.0944207	-1.12739	YES
Q9UBG3	Cornulin	CRNN	542.24	628.59	559.47	527.57	575.5	2159.5	1520.7	768.76	631.89	380.71	2152.26	1598.92	738.205	617.015	374.734	1	1.15925	1.03178	0.972946	1.06134	3.9692	2.94873	1.3614	1.1379	0.691086	2.9692	1.78948	0.329623	0.164955	-0.370252	4.883	NO
P06702	Protein S100-A9	S100A9	22618	19150	17752	15037	18097	58939	19242	42346	20522	14112	58741.3	20231.7	40662.9	20038.9	13890.5	1	0.846671	0.784862	0.664824	0.800115	2.59711	0.894496	1.79781	0.885971	0.614135	1.59711	0.0478254	1.01295	0.221147	-0.18598	2.69305	NO
P29508	Serpin B3	SERPINB3	8645.2	7982.1	6043	6295.5	4762.6	24447	7940.4	12103	8786.3	4108.8	24365	8348.82	11622	8579.47	4044.31	1	0.923298	0.699001	0.728208	0.550895	2.81833	0.965717	1.34432	0.992397	0.46781	1.81833	0.0424184	0.645324	0.264189	-0.0830855	2.68717	NO
O94808	Glutamine--fructose-6-phosphate aminotransferase [isomerizing] 2	GFPT2	7115.1	8182.2	7478.8	6966.3	6498.1	7977.7	9997.7	19430	8772.7	5207.3	7950.95	10511.9	18657.7	8566.19	5125.57	1	1.14998	1.05112	0.979087	0.913283	1.11747	1.47741	2.62227	1.20394	0.720379	0.117475	0.327435	1.57116	0.224858	-0.192904	2.04802	NO
P01040	Cystatin-A;Cystatin-A, N-terminally processed	CSTA	51035	36526	31430	29653	27938	78882	32472	74418	55067	23972	78617.5	34142.2	71460.2	53770.7	23595.7	1	0.715705	0.615852	0.581033	0.547428	1.54046	0.668996	1.40022	1.0536	0.462344	0.540461	-0.0467091	0.784367	0.472572	-0.0850839	1.66561	NO
Q9H7V2	Synapse differentiation-inducing gene protein 1	SYNDIG1	2346	12388	3012.5	18705	12954	18105	12703	2686.3	11265	7832	18044.3	13356.4	2579.53	10999.8	7709.07	1	5.28048	1.2841	7.97315	5.52174	7.69151	5.69326	1.09954	4.68875	3.28605	6.69151	0.41278	-0.184556	-3.28439	-2.23569	1.39965	NO
O95067	G2/mitotic-specific cyclin-B2	CCNB2	26688	23497	20932	17317	17047	37333	30995	30063	22559	20292	37207.8	32589.2	28868.1	22028	19973.5	1	0.880433	0.784323	0.648868	0.638751	1.39418	1.22112	1.08169	0.825388	0.748408	0.394177	0.340686	0.297367	0.176519	0.109656	1.31841	NO
P80297	Metallothionein-1X	MT1X	20728	29854	19365	13903	19878	20873	41150	25253	17070	26178	20803	43266.6	24249.3	16668.2	25767.1	1	1.44027	0.934244	0.670735	0.958993	1.00362	2.08735	1.16988	0.804138	1.24311	0.00361819	0.647074	0.235638	0.133402	0.284114	1.30385	NO
Q9Y646	Carboxypeptidase Q	CPQ	138760	200950	133100	99900	130960	128830	283760	177520	113030	169610	128398	298355	170464	110369	166948	1	1.44818	0.95921	0.719948	0.943788	0.925324	2.15015	1.22848	0.795397	1.20314	-0.0746761	0.701969	0.269273	0.0754484	0.259353	1.23137	NO
Q5T1V6	Probable ATP-dependent RNA helicase DDX59	DDX59	21853	18751	18545	13242	12529	46967	17588	21085	15043	11282	46809.5	18492.6	20247	14688.9	11104.9	1	0.858052	0.848625	0.605958	0.573331	2.14202	0.846229	0.926507	0.672168	0.508165	1.14202	-0.0118226	0.0778821	0.0662097	-0.0651663	1.20912	NO
Q6ZVK8	8-oxo-dGDP phosphatase NUDT18	NUDT18	6365.9	6311.4	6797.5	5946.1	6084.1	9957	7052.6	7655.5	7487.2	7160.9	9923.61	7415.35	7351.23	7310.95	7048.5	1	0.991439	1.0678	0.934055	0.955733	1.55887	1.16486	1.15478	1.14845	1.10723	0.558869	0.173416	0.0869831	0.2144	0.151495	1.18516	NO
P06703	Protein S100-A6	S100A6	31606	39956	34292	27406	55885	56339	41015	27181	45620	55349	56150.1	43124.6	26100.7	44546.1	54480.3	1	1.26419	1.08498	0.867114	1.76818	1.77656	1.36444	0.825814	1.40942	1.72373	0.776563	0.100254	-0.25917	0.542305	-0.0444454	1.11551	NO
Q9Y547	Intraflagellar transport protein 25 homolog	HSPB11	94915	91888	91176	64752	138580	173380	91691	70713	117030	134250	172799	96407.1	67902.4	114275	132143	1	0.968108	0.960607	0.68221	1.46004	1.82056	1.01572	0.715403	1.20397	1.39222	0.820561	0.0476125	-0.245204	0.521762	-0.0678202	1.07691	NO
Q9BRZ2	E3 ubiquitin-protein ligase TRIM56	TRIM56	36727	34361	24712	22959	19525	63601	28497	28631	26986	30963	63387.7	29962.7	27493	26350.7	30477	1	0.935579	0.672856	0.625126	0.531625	1.72592	0.815823	0.748578	0.717476	0.829826	0.725916	-0.119755	0.0757218	0.0923499	0.298201	1.07243	NO
Q8WWW0	Ras association domain-containing protein 5	RASSF5	92554	84661	75214	53923	51310	116340	92975	92420	83113	72964	115950	97757.2	88746.7	81156.5	71818.8	1	0.91472	0.81265	0.582611	0.554379	1.25278	1.05622	0.958864	0.876855	0.775966	0.25278	0.141498	0.146214	0.294244	0.221587	1.05632	NO
Q4V326	G antigen 2E;G antigen 4;G antigen 12I;G antigen 12G;G antigen 12F;G antigen 7;G antigen 1	GAGE2E;GAGE4;GAGE12I;GAGE12G;GAGE12F;GAGE7;GAGE1	2432.4	2489.9	1946	2167.8	2110.8	3607.6	2294.1	3085.8	2459.3	2373.5	3595.5	2412.1	2963.15	2401.41	2336.25	1	1.02364	0.800033	0.891219	0.867785	1.47817	0.991653	1.2182	0.987258	0.96047	0.47817	-0.0319859	0.418168	0.0960397	0.0926847	1.05308	NO
Q9UKB1	F-box/WD repeat-containing protein 11;F-box/WD repeat-containing protein 1A	FBXW11;BTRC	18561	13419	13151	14052	8837.3	20877	14321	20366	22138	9601.9	20807	15057.6	19556.5	21616.9	9451.19	1	0.722968	0.708529	0.757071	0.476122	1.12101	0.81125	1.05364	1.16464	0.509196	0.121006	0.088282	0.345107	0.407568	0.0330743	0.995037	NO
P04264	Keratin, type II cytoskeletal 1	KRT1	3629800	986780	1156800	847530	1086800	2027200	1672000	3233300	3806600	705870	2.0204e+06	1.758e+06	3.10479e+06	3.71699e+06	694791	1	0.271855	0.318695	0.233492	0.29941	0.556615	0.484324	0.855361	1.02402	0.191413	-0.443385	0.212469	0.536666	0.790529	-0.107997	0.988281	NO
P05089	Arginase-1	ARG1	40454	21396	22778	18686	19366	37413	26495	38666	41596	18639	37287.5	27857.8	37129.2	40616.8	18346.4	1	0.528897	0.563059	0.461907	0.478717	0.921727	0.688628	0.917812	1.00402	0.453514	-0.0782734	0.159731	0.354753	0.542117	-0.0252028	0.953126	NO
Q9BXK5	Bcl-2-like protein 13	BCL2L13	237330	178040	200180	204210	166660	313880	188190	307470	219240	189000	312827	197870	295249	214079	186034	1	0.750179	0.843467	0.860447	0.702229	1.31811	0.833732	1.24405	0.902031	0.78386	0.318111	0.0835528	0.400579	0.0415834	0.0816311	0.925457	NO
Q9BTA9	WW domain-containing adapter protein with coiled-coil	WAC	97281	85274	85198	61937	54639	109880	82918	95166	80774	104620	109511	87182.9	91383.5	78872.5	102978	1	0.876574	0.875793	0.636681	0.561662	1.12572	0.896197	0.939377	0.81077	1.05856	0.125723	0.0196225	0.0635843	0.174089	0.4969	0.879919	NO
Q9UPN4	Centrosomal protein of 131 kDa	CEP131	13141	13670	11101	12136	11650	15978	15195	13456	13371	15616	15924.4	15976.6	12921.2	13056.2	15370.9	1	1.04026	0.844761	0.923522	0.886538	1.21181	1.21578	0.983272	0.99355	1.16969	0.211811	0.175524	0.138511	0.0700282	0.283152	0.879026	NO
Q02413	Desmoglein-1	DSG1	11870	8067.1	10312	7989.9	6765.7	9666.1	11131	15252	14612	5228.7	9633.68	11703.5	14645.8	14268	5146.63	1	0.679621	0.868745	0.673117	0.569983	0.811599	0.985975	1.23385	1.20202	0.433583	-0.188401	0.306354	0.365105	0.528907	-0.1364	0.875565	NO
P14635	G2/mitotic-specific cyclin-B1	CCNB1	398700	348170	302250	204310	170220	407930	374950	391110	335820	263160	406562	394236	375565	327915	259030	1	0.873263	0.758089	0.51244	0.426938	1.01972	0.988803	0.941974	0.82246	0.649685	0.0197189	0.11554	0.183885	0.310019	0.222748	0.85191	NO
Q8IY51	Tigger transposable element-derived protein 4	TIGD4	35256	41649	34210	39198	40180	33177	59208	50556	43828	34374	33065.7	62253.4	48546.6	42796.3	33834.5	1	1.18133	0.970331	1.11181	1.13966	0.937875	1.76575	1.37697	1.21387	0.95968	-0.0621246	0.584422	0.406643	0.102061	-0.179984	0.851017	NO
Q8TDG2	Actin-related protein T1	ACTRT1	11943	8905.4	10569	10854	9110.6	20165	9171.8	12568	11378	8284.7	20097.4	9643.55	12068.5	11110.2	8154.67	1	0.745659	0.884954	0.908817	0.76284	1.68277	0.807465	1.01051	0.930265	0.682799	0.682774	0.0618063	0.125553	0.0214482	-0.0800414	0.81154	NO
Q8N4S0	Coiled-coil domain-containing protein 82	CCDC82	20160	19364	19291	15635	14522	34034	22433	19261	16084	13362	33919.9	23586.8	18495.5	15705.4	13152.3	1	0.960516	0.956895	0.775546	0.720337	1.68253	1.16998	0.917433	0.779036	0.652395	0.682533	0.209467	-0.0394616	0.00349081	-0.0679428	0.788086	NO
P25311	Zinc-alpha-2-glycoprotein	AZGP1	8982.6	7148.1	7172.9	7685.9	7466.8	14944	6769.2	9452.4	9665.2	4815.5	14893.9	7117.37	9076.71	9437.68	4739.92	1	0.795772	0.798533	0.855643	0.831252	1.65808	0.792351	1.01048	1.05066	0.527678	0.658081	-0.00342052	0.211944	0.195019	-0.303574	0.75805	NO
Q9NQ39	Putative 40S ribosomal protein S10-like	RPS10P5	8579.3	6597.7	6690.3	5816.1	5305.7	13500	6162.1	7055.3	7247.6	5765.7	13454.7	6479.05	6774.88	7076.99	5675.2	1	0.769025	0.779819	0.677922	0.61843	1.56828	0.755195	0.789678	0.824891	0.6615	0.568278	-0.01383	0.00985872	0.146969	0.0430692	0.754344	NO
Q96RL7	Vacuolar protein sorting-associated protein 13A	VPS13A	37385	25648	33025	34230	26751	67701	24314	34618	39830	20222	67474	25564.6	33242.1	38892.4	19904.6	1	0.686051	0.883376	0.915608	0.715554	1.80484	0.68382	0.889182	1.04032	0.532422	0.80484	-0.00223099	0.00580653	0.124713	-0.183132	0.749996	NO
Q7Z5J4	Retinoic acid-induced protein 1	RAI1	10714	10104	9259.4	7574.6	7785.1	10810	10500	11011	13068	8219	10773.7	11040.1	10573.4	12760.4	8090	1	0.943065	0.864234	0.706982	0.726629	1.00558	1.03043	0.986873	1.191	0.755087	0.00557647	0.0873688	0.122639	0.484018	0.0284578	0.728061	NO
Q3ZCM7	Tubulin beta-8 chain	TUBB8	30870	26693	21906	13501	20987	48512	24315	22847	21557	19690	48349.3	25565.6	21938.9	21049.5	19381	1	0.864691	0.709621	0.43735	0.679851	1.56622	0.828171	0.710688	0.681877	0.627825	0.566223	-0.0365194	0.0010666	0.244527	-0.0520262	0.723271	NO
O15078	Centrosomal protein of 290 kDa;Coiled-coil domain-containing protein 13	CEP290;CCDC13	74585	79026	54444	26676	23832	72905	98712	81860	40446	17839	72660.5	103789	78606.4	39493.9	17559	1	1.05954	0.729959	0.357659	0.319528	0.974197	1.39156	1.05392	0.529515	0.235423	-0.0258028	0.332014	0.323958	0.171856	-0.0841053	0.71792	NO
Q9BUL8	Programmed cell death protein 10	PDCD10	328060	294780	261630	216280	182520	389100	324600	318800	253670	237770	387795	341296	306129	247698	234038	1	0.898555	0.797507	0.65927	0.556362	1.18209	1.04035	0.933149	0.75504	0.7134	0.182086	0.141791	0.135643	0.0957705	0.157038	0.712328	NO
Q9NPD3	Exosome complex component RRP41	EXOSC4	191900	182010	168770	130070	106280	197910	178020	178030	256210	111070	197246	187176	170954	250179	109327	1	0.948463	0.879468	0.677801	0.55383	1.02786	0.975386	0.89085	1.30369	0.569706	0.0278596	0.0269228	0.0113811	0.625892	0.0158764	0.707932	NO
P13987	CD59 glycoprotein	CD59	18754	26339	16494	10118	12985	17275	27906	18444	11048	21778	17217.1	29341.3	17710.9	10787.9	21436.2	1	1.40445	0.879492	0.539512	0.692386	0.918048	1.56454	0.944381	0.575233	1.14302	-0.0819524	0.160091	0.0648889	0.0357217	0.450633	0.629383	NO
Q02224	Centromere-associated protein E	CENPE	3413.6	3640.9	2645	1847.3	2383.8	3603.6	2798.4	2940.3	3131	3577.7	3591.51	2942.34	2823.44	3057.29	3521.55	1	1.06659	0.774842	0.541159	0.698324	1.05212	0.861945	0.827114	0.895622	1.03162	0.0521193	-0.204641	0.0522719	0.354463	0.333298	0.587511	NO
A5D8V6	Vacuolar protein sorting-associated protein 37C	VPS37C	20680	19777	18520	13251	13260	23925	20902	23176	15650	14478	23844.8	21977.1	22254.8	15281.6	14250.8	1	0.956335	0.895551	0.640764	0.641199	1.15303	1.06272	1.07615	0.738955	0.689108	0.153035	0.106388	0.180602	0.0981911	0.047909	0.586125	NO
Q15738	Sterol-4-alpha-carboxylate 3-dehydrogenase, decarboxylating	NSDHL	31688	26766	16991	14719	10614	31450	48497	18258	10970	8810.1	31344.5	50991.5	17532.3	10711.8	8671.82	1	0.844673	0.536197	0.464498	0.334953	0.989161	1.60917	0.553279	0.338038	0.273663	-0.0108393	0.764499	0.0170828	-0.126459	-0.0612907	0.582993	NO
Q8IYK4	Procollagen galactosyltransferase 2	COLGALT2	10932	11203	10619	9384.2	7187.6	13993	12519	11889	8993.8	8465.4	13946.1	13162.9	11416.5	8782.08	8332.53	1	1.02479	0.971368	0.858416	0.657483	1.27571	1.20407	1.04432	0.803337	0.762215	0.275711	0.179283	0.0729474	-0.0550785	0.104732	0.577594	NO
Q9Y4G6	Talin-2	TLN2	96150	70216	60245	48178	45067	98265	60029	91950	80775	47474	97935.4	63116.6	88295.4	78873.5	46728.9	1	0.730276	0.626573	0.501071	0.468716	1.01857	0.656439	0.918309	0.820317	0.486	0.0185694	-0.0738367	0.291735	0.319246	0.0172841	0.572998	NO
Q9H4H8	Protein FAM83D	FAM83D	10980	10512	7767.1	6013.1	6945.5	13981	10934	9356.9	7733.6	6522.8	13934.1	11496.4	8985	7551.55	6420.42	1	0.957377	0.707386	0.547641	0.632559	1.26904	1.04703	0.818306	0.687755	0.584738	0.269045	0.0896532	0.11092	0.140114	-0.0478215	0.56191	NO
Q8TAE6	Protein phosphatase 1 regulatory subunit 14C	PPP1R14C	37931	39424	33488	19653	25067	40227	40876	37257	30175	28921	40092.1	42978.5	35776.2	29464.7	28467.1	1	1.03936	0.882866	0.518125	0.660858	1.05697	1.13307	0.943191	0.776796	0.750496	0.0569742	0.0937087	0.060325	0.258671	0.0896381	0.559317	NO
Q9Y6V0	Protein piccolo	PCLO	72125	65561	71262	58559	80172	82660	75561	85132	75500	71003	82382.8	79447.5	81748.4	73722.7	69888.6	1	0.908991	0.988035	0.81191	1.11157	1.14222	1.10153	1.13343	1.02215	0.968992	0.142222	0.192534	0.145391	0.210242	-0.142578	0.547811	NO
O95848	Uridine diphosphate glucose pyrophosphatase	NUDT14	38926	38664	37226	27793	34666	45055	44080	36458	35177	38594	44903.9	46347.3	35008.9	34348.9	37988.2	1	0.993269	0.956327	0.713996	0.890562	1.15357	1.19065	0.899372	0.882416	0.975909	0.153571	0.197381	-0.0569556	0.16842	0.0853476	0.547764	NO
Q96MX0	CKLF-like MARVEL transmembrane domain-containing protein 3	CMTM3	12737	10938	9828.1	6914.5	7344.5	15550	10500	11114	9356.7	8511.6	15497.8	11040.1	10672.3	9136.44	8378	1	0.858758	0.771618	0.542867	0.576627	1.21676	0.866772	0.837895	0.717315	0.657769	0.216758	0.00801359	0.0662765	0.174448	0.0811419	0.546638	NO
O60518	Ran-binding protein 6	RANBP6	5691.3	6264.5	5334.5	5539.9	4192.5	8050.5	6887.5	5807.6	5346.1	4095.6	8023.5	7241.76	5576.77	5220.25	4031.32	1	1.10072	0.937308	0.973398	0.736651	1.40978	1.27243	0.979877	0.917233	0.70833	0.409784	0.171711	0.0425688	-0.0561646	-0.028321	0.539578	NO
Q92844	TRAF family member-associated NF-kappa-B activator	TANK	36745	29287	27890	21992	23160	41120	32490	33719	27848	24392	40982.1	34161.1	32378.8	27192.4	24009.2	1	0.797034	0.759015	0.598503	0.63029	1.11531	0.929681	0.881176	0.740031	0.653399	0.115311	0.132647	0.122161	0.141528	0.0231093	0.534756	NO
P23511	Nuclear transcription factor Y subunit alpha	NFYA	9054.3	6852.8	7683.5	4243.6	5890.9	11370	6440.3	8592.2	6025.8	6424.3	11331.9	6771.56	8250.7	5883.95	6323.47	1	0.756856	0.848602	0.468683	0.650619	1.25155	0.747883	0.911246	0.649851	0.698394	0.251545	-0.00897277	0.0626438	0.181168	0.0477746	0.534159	NO
D6REC4	Cilia- and flagella-associated protein 99	CFAP99	12080	10284	10042	7301.3	7536.4	16403	9714.4	11644	9334.6	6925.8	16348	10214.1	11181.2	9114.86	6817.09	1	0.851325	0.831291	0.604412	0.623874	1.35331	0.845535	0.925596	0.754541	0.564329	0.35331	-0.0057896	0.0943046	0.150129	-0.0595451	0.532409	NO
Q0VGL1	Ragulator complex protein LAMTOR4;Ragulator complex protein LAMTOR4, N-terminally processed	LAMTOR4	13651	11955	14015	10531	9302.4	15665	13130	14310	12516	11521	15612.5	13805.3	13741.2	12221.4	11340.2	1	0.87576	1.02666	0.771445	0.681445	1.14369	1.01131	1.00661	0.895273	0.830721	0.143686	0.135546	-0.0200545	0.123827	0.149276	0.532282	NO
Q9NZA1	Chloride intracellular channel protein 5;Chloride intracellular channel protein 6	CLIC5;CLIC6	44684	36606	39589	28872	31618	52015	36297	48661	35859	33448	51840.6	38163.9	46726.9	35014.9	32923	1	0.819219	0.885977	0.646137	0.707591	1.16016	0.854085	1.04572	0.783611	0.736796	0.160159	0.0348658	0.159742	0.137473	0.0292053	0.521446	NO
P62328	Thymosin beta-4;Hematopoietic system regulatory peptide	TMSB4X	742870	643140	686980	542460	603520	981840	675030	662840	646560	658470	978547	709750	636495	631340	648135	1	0.86575	0.924765	0.730222	0.812417	1.31725	0.955417	0.856805	0.849866	0.872474	0.317252	0.0896661	-0.0679596	0.119644	0.0600574	0.51866	NO
Q96FX2	DPH3 homolog	DPH3	106290	86499	86004	65623	71583	113730	89736	100530	88819	80942	113349	94351.6	96534.3	86728.2	79671.6	1	0.813802	0.809145	0.617396	0.673469	1.06641	0.887681	0.908217	0.815958	0.749568	0.0664087	0.0738789	0.0990718	0.198562	0.0760989	0.51402	NO
Q9UJK0	Ribosome biogenesis protein TSR3 homolog	TSR3	12210	12583	10781	10333	9093.4	18430	13030	10865	9397.3	9718.5	18368.2	13700.2	10433.2	9176.08	9565.96	1	1.03055	0.882965	0.846274	0.74475	1.50436	1.12205	0.854477	0.751522	0.783453	0.504356	0.0914988	-0.028488	-0.0947516	0.0387028	0.511318	NO
Q14118	Dystroglycan;Alpha-dystroglycan;Beta-dystroglycan	DAG1	12865	12695	13384	10859	9924.6	15253	12760	15111	12483	11137	15201.8	13416.3	14510.4	12189.1	10962.2	1	0.986786	1.04034	0.844073	0.771442	1.18164	1.04285	1.1279	0.947466	0.852095	0.181644	0.0560678	0.0875554	0.103392	0.0806527	0.509312	NO
P30281	G1/S-specific cyclin-D3	CCND3	105830	92495	78286	56258	47544	109740	105150	94409	69324	56800	109372	110558	90656.6	67692.1	55908.5	1	0.873996	0.739734	0.531588	0.449249	1.03347	1.04468	0.856625	0.63963	0.528286	0.0334684	0.170683	0.116892	0.108042	0.079037	0.508122	NO
Q9H9C1	Spermatogenesis-defective protein 39 homolog	VIPAS39	131320	120730	93781	62686	63287	160690	124460	108310	76768	69537	160151	130862	104005	74960.8	68445.6	1	0.919357	0.714141	0.477353	0.48193	1.21955	0.996509	0.791998	0.570826	0.521212	0.219548	0.0771521	0.0778566	0.0934728	0.0392824	0.507312	NO
Q86WH2	Ras association domain-containing protein 3	RASSF3	23690	21163	16639	12140	10005	26995	21101	21429	14785	11717	26904.5	22186.3	20577.3	14437	11533.1	1	0.893331	0.702364	0.512453	0.42233	1.13569	0.936527	0.868606	0.609411	0.486834	0.135689	0.0431968	0.166243	0.0969588	0.0645037	0.506591	NO
Q9NZQ3	NCK-interacting protein with SH3 domain	NCKIPSD	32285	23606	17086	10937	8785.1	36311	24117	22533	15449	10889	36189.2	25357.5	21637.4	15085.3	10718.1	1	0.731175	0.529224	0.338764	0.272111	1.12093	0.785425	0.6702	0.467255	0.331984	0.12093	0.05425	0.140976	0.128491	0.0598727	0.504519	NO
O96006	Zinc finger BED domain-containing protein 1	ZBED1	19831	14473	15330	11602	11492	28984	12147	18231	15039	8998.3	28886.8	12771.8	17506.4	14685	8857.07	1	0.729817	0.773032	0.585044	0.579497	1.45665	0.644031	0.882779	0.740506	0.446627	0.456648	-0.0857857	0.109747	0.155462	-0.132869	0.503203	NO
Q8N2K1	Ubiquitin-conjugating enzyme E2 J2	UBE2J2	18860	22315	17416	17802	22843	32634	21416	16654	20908	17532	32524.6	22517.5	15992.1	20415.8	17256.8	1	1.18319	0.923436	0.943902	1.21119	1.72453	1.19393	0.847936	1.08249	0.914996	0.724526	0.0107389	-0.0754999	0.13859	-0.296192	0.502163	NO
Q5T440	Putative transferase CAF17, mitochondrial	IBA57	155210	153640	142420	129590	112880	216870	140710	148030	132090	138510	216143	147947	142146	128981	136336	1	0.989885	0.917596	0.834933	0.727273	1.39258	0.953208	0.915833	0.831007	0.878397	0.392582	-0.0366765	-0.00176266	-0.0039267	0.151124	0.501341	NO
Q9UKT4	F-box only protein 5	FBXO5	42275	42615	36739	30269	30283	45925	42252	53537	33023	29964	45771	44425.2	51409.1	32245.6	29493.7	1	1.00804	0.869048	0.716002	0.716334	1.0827	1.05086	1.21606	0.762759	0.697663	0.0826962	0.0428205	0.347017	0.0467563	-0.0186708	0.500619	NO
P56277	Cx9C motif-containing protein 4	CMC4	171080	158170	159860	132540	151470	172180	177390	190480	159680	163620	171603	186514	182909	155921	161052	1	0.924538	0.934417	0.774725	0.885375	1.00305	1.09022	1.06914	0.911393	0.941383	0.00305446	0.165677	0.134728	0.136667	0.0560081	0.496135	NO
P25791	Rhombotin-2	LMO2	38525	36882	24384	17389	19543	45516	38153	25408	25169	21646	45363.4	40115.4	24398.1	24576.5	21306.3	1	0.957352	0.63294	0.451369	0.507281	1.1775	1.04128	0.633307	0.637937	0.55305	0.177504	0.0839301	0.000366949	0.186567	0.045769	0.494138	NO
P22830	Ferrochelatase, mitochondrial	FECH	122700	111500	107540	98882	87917	141690	114350	123210	109160	104440	141215	120232	118313	106590	102801	1	0.90872	0.876447	0.805884	0.71652	1.15089	0.979883	0.964245	0.868707	0.837822	0.150895	0.0711623	0.0877988	0.0628225	0.121302	0.49398	NO
P63261	Actin, cytoplasmic 2;Actin, cytoplasmic 2, N-terminally processed	ACTG1	7830	6009.2	7829.1	5146	5032.7	10344	6441.5	7736.7	5868.5	5489.2	10309.3	6772.82	7429.2	5730.35	5403.04	1	0.767458	0.999885	0.657216	0.642746	1.31664	0.864983	0.948812	0.731846	0.690044	0.316642	0.0975248	-0.051073	0.07463	0.047298	0.485022	NO
P00739	Haptoglobin-related protein;Haptoglobin;Haptoglobin alpha chain;Haptoglobin beta chain	HPR;HP	15564	14771	14687	12368	14673	19858	13925	13958	15851	16551	19791.4	14641.2	13403.2	15477.9	16291.2	1	0.949049	0.943652	0.794654	0.942753	1.27161	0.940712	0.861169	0.994465	1.04672	0.271614	-0.00833754	-0.0824835	0.199811	0.103972	0.484576	NO
Q96FF7	Uncharacterized protein LOC113230		9387.5	9858	7992.1	8003.6	7436.4	12931	9094.7	8840.9	8147.9	8394.6	12887.6	9562.49	8489.51	7956.09	8262.84	1	1.05012	0.851356	0.852581	0.79216	1.37285	1.01864	0.904342	0.84752	0.880196	0.37285	-0.0314794	0.0529865	-0.00506051	0.0880363	0.477333	NO
Q9H2G9	Golgin-45	BLZF1	6168.1	5017.6	7720.4	6460.7	5736.7	6738.8	5495.9	6251.9	6050	9725.8	6716.2	5778.58	6003.41	5907.58	9573.15	1	0.813476	1.25167	1.04744	0.930059	1.08886	0.93685	0.9733	0.957763	1.55204	0.0888604	0.123374	-0.278366	-0.0896743	0.621982	0.466176	NO
Q9Y2B9	cAMP-dependent protein kinase inhibitor gamma	PKIG	2301.3	1704.1	2064.7	1651.2	1579.5	2288.5	2008	2443.2	1849.4	1854.3	2280.83	2111.28	2346.09	1805.86	1825.2	1	0.740495	0.897189	0.717507	0.686351	0.991103	0.91743	1.01946	0.784715	0.793115	-0.00889713	0.176936	0.122276	0.0672073	0.106764	0.464285	NO
P06454	Prothymosin alpha;Prothymosin alpha, N-terminally processed;Thymosin alpha-1	PTMA	1460800	1148000	1231100	888800	1075800	1803300	1149800	1340000	1164800	1068700	1.79725e+06	1.20894e+06	1.28674e+06	1.13738e+06	1.05193e+06	1	0.785871	0.842757	0.608434	0.736446	1.23032	0.827588	0.880846	0.778601	0.720103	0.230321	0.041717	0.0380891	0.170167	-0.0163431	0.463951	NO
Q6UWW8	Carboxylesterase 3	CES3	13276	13531	12456	10285	12721	15767	14268	14378	12141	12242	15714.1	15001.9	13806.5	11855.2	12049.9	1	1.01921	0.938234	0.774706	0.958195	1.18365	1.13	1.03996	0.892979	0.907642	0.183649	0.110792	0.101727	0.118273	-0.0505534	0.463888	NO
Q9NQP4	Prefoldin subunit 4	PFDN4	197250	159390	177480	131990	145610	242520	169600	183110	165130	147970	241707	178323	175832	161243	145648	1	0.808061	0.899772	0.669151	0.7382	1.22538	0.904048	0.891418	0.817454	0.73839	0.225382	0.0959868	-0.00835421	0.148303	0.000190139	0.461508	NO
P19105	Myosin regulatory light chain 12A;Myosin regulatory light chain 12B;Myosin regulatory light polypeptide 9	MYL12A;MYL12B;MYL9	538440	446530	369760	248320	283540	584630	453770	448260	317200	336170	582669	477110	430444	309733	330894	1	0.829303	0.686725	0.461184	0.526595	1.08214	0.886096	0.799427	0.575241	0.614541	0.0821434	0.0567932	0.112702	0.114057	0.0879459	0.453642	NO
Q9BT25	HAUS augmin-like complex subunit 8	HAUS8	39407	33371	23870	18039	19671	44535	32922	29629	22376	23234	44385.6	34615.3	28451.4	21849.3	22869.3	1	0.846829	0.60573	0.457761	0.499175	1.12634	0.878406	0.721988	0.554451	0.580337	0.126339	0.0315768	0.116258	0.0966899	0.0811614	0.452025	NO
Q96F63	Coiled-coil domain-containing protein 97	CCDC97	62422	58823	52519	38186	26134	79984	54072	54768	52529	26177	79715.8	56853.2	52591.2	51292.4	25766.1	1	0.942344	0.841354	0.611739	0.418666	1.27705	0.910788	0.842511	0.821705	0.412773	0.277046	-0.0315562	0.00115661	0.209965	-0.00589322	0.450718	NO
P60903	Protein S100-A10	S100A10	69222	57583	59319	46689	51070	91431	58408	59796	59141	48127	91124.4	61412.2	57419.4	57748.8	47371.6	1	0.83186	0.856939	0.674482	0.737771	1.31641	0.887178	0.829496	0.834255	0.684343	0.316408	0.055318	-0.0274428	0.159773	-0.0534279	0.450628	NO
P17096	High mobility group protein HMG-I/HMG-Y	HMGA1	54277	53385	54257	47336	49507	55690	52646	65875	54171	56861	55503.2	55353.9	63256.7	52895.8	55968.5	1	0.983566	0.999632	0.872119	0.912117	1.02259	1.01984	1.16544	0.974553	1.03116	0.0225921	0.0362742	0.165811	0.102434	0.119047	0.446158	NO
Q9H4I2	Zinc fingers and homeoboxes protein 3	ZHX3	43421	41846	40682	36546	33534	49373	39241	43603	49449	35246	49207.4	41259.4	41870	48284.9	34692.8	1	0.963727	0.93692	0.841666	0.772299	1.13326	0.950217	0.964279	1.11202	0.798986	0.133263	-0.0135104	0.0273591	0.270352	0.0266873	0.444151	NO
P52655	Transcription initiation factor IIA subunit 1;Transcription initiation factor IIA alpha chain;Transcription initiation factor IIA beta chain	GTF2A1	43507	33574	29921	26150	23052	63739	27323	32305	27533	25696	63525.2	28728.4	31021	26884.9	25292.7	1	0.771692	0.687728	0.601053	0.529846	1.46012	0.660316	0.713012	0.617943	0.581347	0.460115	-0.111376	0.0252835	0.0168906	0.0515017	0.442415	NO
O43542	DNA repair protein XRCC3	XRCC3	6776.3	6336.8	4812.1	5844.9	4018.8	8338.2	7575.5	5856.4	5258.8	3812.4	8310.24	7965.15	5623.63	5135.01	3752.56	1	0.935142	0.710137	0.86255	0.593067	1.22637	1.17544	0.829897	0.757789	0.553777	0.226368	0.2403	0.11976	-0.104761	-0.0392896	0.442377	NO
Q9NSY2	StAR-related lipid transfer protein 5	STARD5	3166.1	2430.4	2996.9	1634.6	2375	3385.8	3045.3	2620.8	2717.2	2267.6	3374.44	3201.94	2516.63	2653.24	2232.01	1	0.767632	0.946559	0.516282	0.750134	1.0658	1.01132	0.794869	0.838014	0.704971	0.0658049	0.243686	-0.15169	0.321732	-0.0451633	0.43437	NO
A6NFD8	Hairy and enhancer of split-related protein HELT	HELT	5016.8	4216.4	4751.4	4546.8	3246.9	5236.6	4333.4	5176.8	6028.3	3376.7	5219.04	4556.29	4971.04	5886.39	3323.7	1	0.840456	0.947098	0.906315	0.647205	1.04031	0.908206	0.990879	1.17334	0.662514	0.0403121	0.0677502	0.0437816	0.267021	0.0153086	0.434174	NO
Q9HBM0	Vezatin	VEZT	5322.8	4561.4	4756.3	4426.2	4051.2	5495.6	5447.1	5206.5	4079.5	5305.7	5477.17	5727.27	4999.56	3983.47	5222.42	1	0.856955	0.893571	0.831555	0.761103	1.029	1.07599	0.939273	0.748378	0.981142	0.0290015	0.219034	0.0457021	-0.0831768	0.220039	0.430599	NO
Q7Z3D4	LysM and putative peptidoglycan-binding domain-containing protein 3	LYSMD3	4102.8	4778.6	4527.1	3806.1	3622	6282.9	4574	4070.6	4141.1	3627.7	6261.83	4809.26	3908.81	4043.62	3570.76	1	1.16472	1.10342	0.927684	0.882812	1.52623	1.17219	0.952718	0.985575	0.870323	0.526233	0.00747402	-0.150699	0.0578913	-0.0124889	0.42841	NO
Q9NZT1	Calmodulin-like protein 5	CALML5	10158	3417.1	4268	3093.6	2556.9	6342.6	2993.9	7410.2	8747.6	2719.1	6321.33	3147.89	7115.68	8541.68	2676.42	1	0.336395	0.420161	0.304548	0.251713	0.622301	0.309893	0.7005	0.840882	0.263479	-0.377699	-0.0265021	0.280338	0.536334	0.0117663	0.424237	NO
Q8NI36	WD repeat-containing protein 36	WDR36	11854	4200.7	3058.5	3492.6	2010.6	9420.3	5718.5	5281	7496	1878.3	9388.71	6012.63	5071.1	7319.54	1848.82	1	0.35437	0.258014	0.294635	0.169614	0.792029	0.507224	0.427797	0.617474	0.155966	-0.207971	0.152854	0.169783	0.32284	-0.0136478	0.423857	NO
P25208	Nuclear transcription factor Y subunit beta	NFYB	21104	21716	22996	22305	26411	25451	25009	25178	24684	23840	25365.6	26295.3	24177.3	24102.9	23465.8	1	1.029	1.08965	1.05691	1.25147	1.20194	1.24599	1.14563	1.1421	1.11191	0.201935	0.216989	0.0559741	0.0851936	-0.139556	0.420537	NO
Q969H8	Myeloid-derived growth factor	MYDGF	404120	427210	360900	226540	306910	350250	466910	394610	271960	415380	349075	490926	378926	265558	408860	1	1.05714	0.893052	0.560576	0.759453	0.863791	1.2148	0.937657	0.657126	1.01173	-0.136209	0.157665	0.0446053	0.0965504	0.252277	0.414889	NO
Q8TBM8	DnaJ homolog subfamily B member 14	DNAJB14	15027	11773	12738	9796.1	11254	16555	11735	13117	12906	12918	16499.5	12338.6	12595.7	12602.2	12715.2	1	0.783456	0.847674	0.6519	0.748919	1.09799	0.821095	0.838201	0.838636	0.84616	0.0979889	0.0376384	-0.00947273	0.186736	0.0972411	0.410132	NO
Q5VSY0	G kinase-anchoring protein 1	GKAP1	7427	7286.1	7033.5	6348.6	6352.8	9875.7	7722.4	7522.1	6733.8	5820.2	9842.58	8119.6	7223.13	6575.28	5728.85	1	0.981029	0.947018	0.8548	0.855366	1.32524	1.09325	0.97255	0.885322	0.771354	0.325243	0.112226	0.0255322	0.0305215	-0.0840113	0.409511	NO
P19532	Transcription factor E3	TFE3	21505	22527	16379	16852	16187	29333	23057	16604	18580	14827	29234.6	24242.9	15944.1	18142.6	14594.3	1	1.04752	0.761637	0.783632	0.752709	1.35943	1.12732	0.741412	0.843646	0.678646	0.359434	0.0797926	-0.0202251	0.0600148	-0.0740628	0.404953	NO
P29373	Cellular retinoic acid-binding protein 2	CRABP2	32268	27565	28954	25645	24282	40546	27889	30396	27395	26285	40410	29323.5	29187.9	26750.1	25872.4	1	0.854252	0.897298	0.79475	0.75251	1.25232	0.908748	0.904546	0.828998	0.801799	0.252325	0.0544959	0.00724818	0.0342478	0.0492884	0.397605	NO
Q8TBF2	Prostamide/prostaglandin F synthase	FAM213B	59884	61285	51259	41571	41240	63941	62174	62921	48216	43044	63726.6	65371.9	60420.1	47081	42368.4	1	1.0234	0.855972	0.694192	0.688665	1.06417	1.09164	1.00895	0.786203	0.707508	0.0641667	0.0682474	0.152982	0.0920108	0.018843	0.396249	NO
P28799	Granulins;Acrogranin;Paragranulin;Granulin-1;Granulin-2;Granulin-3;Granulin-4;Granulin-5;Granulin-6;Granulin-7	GRN	175850	158300	149110	144700	125090	209900	165700	166870	136090	148100	209196	174223	160238	132886	145775	1	0.900199	0.847939	0.82286	0.711345	1.18963	0.990747	0.911218	0.75568	0.828976	0.189628	0.0905477	0.063279	-0.0671801	0.117631	0.393906	NO
O43708	Maleylacetoacetate isomerase	GSTZ1	163000	152780	154020	134860	137420	167490	167160	171580	155820	148980	166928	175758	164760	152152	146642	1	0.937301	0.944908	0.827362	0.843067	1.0241	1.07827	1.0108	0.933447	0.899642	0.0240999	0.140969	0.065892	0.106085	0.0565746	0.393621	NO
Q99729	Heterogeneous nuclear ribonucleoprotein A/B	HNRNPAB	444420	449050	400370	288500	408130	494340	474560	398920	356500	449210	492682	498969	383065	348108	442159	1	1.01042	0.900882	0.649161	0.918343	1.1086	1.12274	0.861943	0.783286	0.994913	0.108596	0.112324	-0.0389393	0.134125	0.0765702	0.392676	NO
P63167	Dynein light chain 1, cytoplasmic	DYNLL1	191540	161160	148530	99343	109050	240610	155660	152880	132720	106160	239803	163666	146804	129596	104494	1	0.841391	0.775452	0.518654	0.569333	1.25197	0.854476	0.766439	0.676599	0.545545	0.251974	0.0130855	-0.009013	0.157945	-0.0237875	0.390203	NO
Q9BWT3	Poly(A) polymerase gamma	PAPOLG	9977.1	8723.9	9460.8	7170.2	9007.2	12427	9192.9	7738.7	10238	8891.7	12385.3	9665.74	7431.12	9996.99	8752.14	1	0.874392	0.948251	0.718666	0.902787	1.24138	0.968792	0.744817	1.00199	0.877223	0.241375	0.0944	-0.203434	0.283328	-0.0255647	0.390104	NO
Q7Z7K0	COX assembly mitochondrial protein homolog	CMC1	3789.2	3236.2	3326.8	2415.8	2562.4	3618.3	3173.8	4276.2	2915.9	2957.8	3606.17	3337.04	4106.24	2847.26	2911.38	1	0.854059	0.877969	0.637549	0.676238	0.951696	0.880673	1.08367	0.751414	0.768335	-0.0483043	0.0266138	0.2057	0.113865	0.0920973	0.389972	NO
P16949	Stathmin	STMN1	1321100	1236500	1214700	1060300	1288200	1755300	1268100	1188100	1162900	1294000	1.74941e+06	1.33332e+06	1.14088e+06	1.13552e+06	1.27369e+06	1	0.935962	0.919461	0.802589	0.975097	1.32421	1.00925	0.863582	0.85953	0.964113	0.32421	0.0732911	-0.0558793	0.056941	-0.0109835	0.387579	NO
Q14692	Ribosome biogenesis protein BMS1 homolog	BMS1	36072	33256	25286	14578	19541	34678	30183	29317	23259	25913	34561.7	31735.5	28151.8	22711.5	25506.3	1	0.921934	0.700987	0.404136	0.541722	0.958131	0.879781	0.780433	0.629615	0.707094	-0.041869	-0.0421527	0.0794458	0.225479	0.165371	0.386274	NO
Q6MZP7	Protein lin-54 homolog	LIN54	137980	119690	123860	100670	98640	148800	143390	125910	110160	107970	148301	150765	120906	107567	106275	1	0.867445	0.897666	0.729598	0.714886	1.0748	1.09266	0.876255	0.779582	0.770223	0.0748005	0.225216	-0.0214118	0.0499839	0.0553365	0.383925	NO
Q96J88	Epithelial-stromal interaction protein 1	EPSTI1	6118.9	6449.1	6568.7	7862.8	6352.5	9874.7	7448.5	6626.3	5668.9	6213.9	9841.58	7831.61	6362.93	5535.45	6116.37	1	1.05396	1.07351	1.285	1.03818	1.60839	1.27991	1.03988	0.904648	0.999586	0.608391	0.225942	-0.0336283	-0.380354	-0.0385905	0.38176	NO
Q9NVA1	Ubiquinol-cytochrome-c reductase complex assembly factor 1	UQCC1	13544	14427	12169	8874.7	8471.7	14313	13063	12770	10513	12260	14265	13734.9	12262.4	10265.5	12067.6	1	1.06519	0.898479	0.65525	0.625495	1.05323	1.01409	0.905378	0.757938	0.89099	0.0532338	-0.0511003	0.00689937	0.102689	0.265495	0.377217	NO
Q7Z3C6	Autophagy-related protein 9A	ATG9A	27644	28405	27795	22273	21161	30185	29328	31010	25228	22717	30083.8	30836.5	29777.5	24634.1	22360.4	1	1.02753	1.00546	0.805708	0.765483	1.08826	1.11549	1.07718	0.89112	0.808871	0.0882567	0.0879573	0.0717147	0.0854117	0.0433888	0.376729	NO
O14561	Acyl carrier protein, mitochondrial	NDUFAB1	140480	134160	129860	96411	125070	173920	138500	116880	130760	121940	173337	145624	112235	127682	120026	1	0.955011	0.924402	0.686297	0.890305	1.23389	1.03662	0.798936	0.908897	0.8544	0.233889	0.0816043	-0.125466	0.2226	-0.035905	0.376722	NO
Q15121	Astrocytic phosphoprotein PEA-15	PEA15	271920	243800	258770	197460	223930	304200	255960	267250	241400	237090	303180	269125	256628	235717	233369	1	0.896587	0.95164	0.726169	0.823514	1.11496	0.989723	0.943763	0.866863	0.858226	0.11496	0.0931353	-0.00787763	0.140693	0.0347113	0.375622	NO
P08590	Myosin light chain 3	MYL3	76030	72438	63576	44291	55247	86203	73554	67311	57624	56820	85913.9	77337.3	64635.7	56267.5	55928.2	1	0.952755	0.836196	0.582546	0.726647	1.13	1.01719	0.850134	0.74007	0.735607	0.13	0.0644385	0.0139375	0.157523	0.00895922	0.374859	NO
Q9H063	Repressor of RNA polymerase III transcription MAF1 homolog	MAF1	17984	12570	14174	8733.4	7991.4	19790	14661	15611	11279	7137.2	19723.6	15415.1	14990.5	11013.5	7025.18	1	0.698955	0.788145	0.485621	0.444362	1.09673	0.857156	0.833548	0.612405	0.390635	0.0967321	0.158201	0.045403	0.126784	-0.0537268	0.373394	NO
P35580	Myosin-10	MYH10	4481000	3663600	2308000	1304100	1457200	4717800	3581300	3253300	1581900	1771800	4.70198e+06	3.7655e+06	3.12399e+06	1.54466e+06	1.74399e+06	1	0.817585	0.515064	0.291029	0.325195	1.04931	0.840327	0.697165	0.344714	0.389197	0.0493144	0.0227415	0.182101	0.0536847	0.0640014	0.371843	NO
Q96JK2	DDB1- and CUL4-associated factor 5	DCAF5	13367	10966	10567	11100	8807.4	13976	14362	12498	10047	9074.4	13929.1	15100.7	12001.3	9810.49	8931.97	1	0.820379	0.790529	0.830403	0.658891	1.04205	1.1297	0.897827	0.733933	0.668211	0.0420535	0.309322	0.107298	-0.0964698	0.00931928	0.371524	NO
Q9UI15	Transgelin-3	TAGLN3	65273	49198	62787	49543	37911	67321	44274	77005	65415	38056	67095.2	46551.2	73944.4	63875.1	37458.7	1	0.753727	0.961914	0.759012	0.580807	1.02792	0.713178	1.13285	0.978584	0.573877	0.027917	-0.0405491	0.170934	0.219572	-0.00692961	0.370944	NO
A6NKT7	RanBP2-like and GRIP domain-containing protein 3	RGPD3	36064	30962	30523	24183	24990	34592	46333	32833	24183	22041	34476	48716.1	31528	23613.7	21695.1	1	0.858529	0.846356	0.670558	0.692935	0.955967	1.35082	0.874224	0.654773	0.601571	-0.0440332	0.492296	0.0278678	-0.0157853	-0.0913639	0.368981	NO
Q9H5H4	Zinc finger protein 768	ZNF768	43478	38636	40125	31094	27860	48453	39977	47281	34624	28075	48290.5	42033.2	45401.8	33808.9	27634.3	1	0.888633	0.922881	0.715166	0.640784	1.11069	0.96677	1.04425	0.77761	0.635594	0.110688	0.0781366	0.121367	0.0624439	-0.00519015	0.367445	NO
Q8IWD4	Coiled-coil domain-containing protein 117	CCDC117	45010	42031	40678	37950	33233	54138	42967	47015	36630	35954	53956.4	45177	45146.3	35767.7	35389.7	1	0.933815	0.903755	0.843146	0.738347	1.19877	1.00371	1.00303	0.794661	0.786263	0.198766	0.0698959	0.0992746	-0.0484845	0.0479155	0.367367	NO
Q2TAZ0	Autophagy-related protein 2 homolog A	ATG2A	25170	21430	17454	13571	10693	29349	21794	22366	14994	9417.9	29250.6	22915	21477	14641	9270.08	1	0.85141	0.693445	0.539174	0.424831	1.16212	0.910408	0.853279	0.581686	0.368299	0.16212	0.0589979	0.159835	0.0425123	-0.0565324	0.366933	NO
Q7Z7E8	Ubiquitin-conjugating enzyme E2 Q1	UBE2Q1	192210	177340	179070	131570	120610	202310	189150	201510	154960	127940	201632	198879	193501	151312	125932	1	0.922637	0.931637	0.684512	0.627491	1.04902	1.0347	1.00672	0.787223	0.655179	0.0490168	0.11206	0.0750783	0.102711	0.0276879	0.366554	NO
Q15464	SH2 domain-containing adapter protein B	SHB	33017	30701	30653	23831	22504	38988	28811	35603	25047	25341	38857.2	30292.9	34187.9	24457.4	24943.3	1	0.929854	0.928401	0.72178	0.681588	1.17689	0.917494	1.03546	0.740751	0.755467	0.176886	-0.0123604	0.107064	0.0189715	0.0738788	0.36444	NO
Q8NDC0	MAPK-interacting and spindle-stabilizing protein-like	MAPK1IP1L	29905	24077	26562	20322	23042	32407	25424	29388	24736	23773	32298.3	26731.7	28219.9	24153.7	23399.9	1	0.805116	0.888213	0.679552	0.770507	1.08003	0.893887	0.943653	0.807681	0.782473	0.0800306	0.0887707	0.0554405	0.128129	0.0119668	0.364338	NO
Q9Y4H4	G-protein-signaling modulator 3	GPSM3	42119	43094	42247	37563	35784	45994	43852	48553	43172	35945	45839.7	46107.5	46623.2	42155.7	35380.8	1	1.02315	1.00304	0.89183	0.849593	1.08834	1.0947	1.10694	1.00087	0.84002	0.088339	0.0715481	0.103901	0.109041	-0.00957246	0.363257	NO
Q9H1K0	Rabenosyn-5	RBSN	118030	111190	89586	63371	50410	141910	110510	103580	71416	49051	141434	116194	99463.1	69734.8	48281.1	1	0.942049	0.75901	0.536906	0.427095	1.19829	0.984445	0.842694	0.590823	0.409058	0.198289	0.0423968	0.0836831	0.0539171	-0.0180369	0.360249	NO
O95613	Pericentrin	PCNT	229830	247430	215800	165280	206080	241220	278730	257250	189010	185040	240411	293067	247025	184561	182136	1	1.07658	0.938955	0.71914	0.896663	1.04604	1.27514	1.07482	0.803031	0.79248	0.0460384	0.198566	0.135863	0.0838908	-0.104183	0.360176	NO
Q96JK9	Mastermind-like protein 3	MAML3	17936	16549	17079	14969	14334	18032	17700	18004	17794	16327	17971.5	18610.4	17288.4	17375.1	16070.7	1	0.922669	0.952219	0.834579	0.799175	1.00198	1.0376	0.963895	0.968729	0.896004	0.0019807	0.114931	0.0116757	0.13415	0.0968296	0.359567	NO
Q10713	Mitochondrial-processing peptidase subunit alpha	PMPCA	501340	434570	399730	310230	292930	525600	434280	445160	371020	353770	523837	456617	427467	362286	348217	1	0.866817	0.797323	0.618802	0.584294	1.04487	0.910794	0.852648	0.722635	0.694573	0.0448743	0.0439767	0.0553252	0.103834	0.110279	0.358289	NO
Q86XN7	Proline and serine-rich protein 1	PROSER1	13527	12247	12291	9026.2	9553.1	15739	11723	14049	10647	9731.7	15686.2	12326	13490.6	10396.4	9578.95	1	0.905374	0.908627	0.667273	0.706225	1.15962	0.911213	0.99731	0.768564	0.708136	0.159623	0.00583827	0.0886826	0.101291	0.00191129	0.357346	NO
Q8IVV7	Glucose-induced degradation protein 4 homolog	GID4	28823	23969	23554	20407	15758	42095	22812	25843	18907	13743	41953.8	23985.3	24815.8	18461.9	13527.3	1	0.831593	0.817195	0.708011	0.546716	1.45557	0.83216	0.860974	0.640527	0.469323	0.455568	0.000566866	0.0437792	-0.0674836	-0.0773933	0.355037	NO
Q92597	Protein NDRG1	NDRG1	147620	120620	119200	102840	97026	170670	128660	125950	116400	101310	170098	135278	120944	113660	99719.9	1	0.817098	0.807479	0.696654	0.657269	1.15227	0.916391	0.819293	0.769949	0.675517	0.152267	0.0992931	0.0118142	0.0732955	0.0182487	0.354918	NO
P09110	3-ketoacyl-CoA thiolase, peroxisomal	ACAA1	13909	11945	10988	8981	9070	15178	11985	12290	10051	10620	15127.1	12601.5	11801.5	9814.39	10453.3	1	0.858796	0.789992	0.645697	0.652096	1.08758	0.905993	0.848481	0.705615	0.75155	0.0875762	0.0471961	0.058489	0.0599176	0.0994544	0.352633	NO
Q13156	Replication protein A 30 kDa subunit	RPA4	5434.4	6364.1	5405.8	6013.6	4557	6636.8	6419.8	6565.5	5552	4672.5	6614.54	6750	6304.55	5421.3	4599.16	1	1.17108	0.994737	1.10658	0.838547	1.21716	1.24209	1.16012	0.99759	0.846305	0.217161	0.0710112	0.165381	-0.10899	0.00775831	0.352322	NO
P61626	Lysozyme C	LYZ	33944	30035	29600	29100	26809	30276	43906	31319	28852	27277	30174.5	46164.3	30074.2	28172.8	26848.9	1	0.88484	0.872025	0.857294	0.789801	0.888948	1.36001	0.885995	0.829979	0.790975	-0.111052	0.475174	0.01397	-0.0273153	0.00117452	0.351952	NO
Q99956	Dual specificity protein phosphatase 9	DUSP9	34754	27326	24582	14466	13568	42062	26080	27495	17352	14440	41920.9	27421.4	26402.2	16943.5	14213.4	1	0.786269	0.707314	0.41624	0.390401	1.20622	0.789015	0.759688	0.487527	0.40897	0.206219	0.00274584	0.0523735	0.0712875	0.0185692	0.351195	NO
Q8IZ07	Ankyrin repeat domain-containing protein 13A	ANKRD13A	148610	139760	117510	99321	84222	184070	130950	124760	106080	98407	183453	137685	119801	103583	96862.4	1	0.940448	0.790727	0.668333	0.566732	1.23446	0.926488	0.806146	0.697011	0.651789	0.234457	-0.0139598	0.0154182	0.0286779	0.0850577	0.349651	NO
P63313	Thymosin beta-10	TMSB10	136820	116490	124310	97808	118400	152890	120490	127690	120510	124210	152377	126687	122615	117673	122260	1	0.851411	0.908566	0.714866	0.865371	1.11371	0.925942	0.896176	0.860058	0.893586	0.113706	0.0745317	-0.0123896	0.145192	0.0282154	0.349255	NO
Q6F5E8	Leucine-rich repeat-containing protein 16C	RLTPR	15073	12460	13526	11349	12776	16343	13803	15164	13468	12118	16288.2	14513	14561.3	13151	11927.8	1	0.826644	0.897366	0.752936	0.847608	1.08062	0.962845	0.966051	0.872484	0.791335	0.0806203	0.136201	0.0686853	0.119549	-0.0562729	0.348783	NO
P42167	Lamina-associated polypeptide 2, isoforms beta/gamma;Thymopoietin;Thymopentin	TMPO	91211	78639	80914	70794	77822	105440	80454	88375	84572	75241	105086	84592.2	84862.5	82581.1	74060	1	0.862166	0.887108	0.776156	0.853208	1.15212	0.927434	0.930397	0.905386	0.811964	0.152124	0.065268	0.0432893	0.129229	-0.0412446	0.348666	NO
P68133	Actin, alpha skeletal muscle;Actin, alpha cardiac muscle 1;Actin, gamma-enteric smooth muscle;Actin, aortic smooth muscle	ACTA1;ACTC1;ACTG2;ACTA2	864880	726210	744620	520030	517220	954550	681500	814440	654420	593070	951349	716553	782069	639015	583761	1	0.839666	0.860952	0.601274	0.598025	1.09998	0.8285	0.904252	0.738848	0.674962	0.0999777	-0.0111656	0.0433001	0.137574	0.0769371	0.346623	NO
O75665	Oral-facial-digital syndrome 1 protein	OFD1	6925	5212.5	5873	5435.9	5733.9	8417.8	5971.4	6310.4	5860.6	5208.5	8389.57	6278.54	6059.59	5722.64	5126.75	1	0.752708	0.848087	0.784968	0.828	1.21149	0.906648	0.875031	0.826374	0.740325	0.21149	0.153941	0.0269441	0.0414063	-0.0876753	0.346106	NO
Q9H3S4	Thiamin pyrophosphokinase 1	TPK1	43998	37281	40522	32383	31446	46637	36877	46395	37381	35074	46480.6	38773.8	44551	36501	34523.5	1	0.847334	0.920996	0.736011	0.714714	1.05643	0.881262	1.01257	0.829607	0.78466	0.0564251	0.0339282	0.0915721	0.0935959	0.0699461	0.345467	NO
Q9P1Y5	Calmodulin-regulated spectrin-associated protein 3	CAMSAP3	2190.5	2247.7	2479.1	1738.4	2482.5	2632.9	2472.1	2338.1	2702.6	1806.3	2624.07	2599.25	2245.17	2638.98	1777.95	1	1.02611	1.13175	0.793609	1.1333	1.19793	1.1866	1.02496	1.20474	0.811663	0.197932	0.16049	-0.106793	0.41113	-0.321639	0.341119	NO
Q96BM9	ADP-ribosylation factor-like protein 8A	ARL8A	46554	38784	38899	32203	26431	53934	38324	44463	34025	29203	53753.1	40295.2	42695.8	33224	28744.6	1	0.833097	0.835567	0.691734	0.567749	1.15464	0.865558	0.917124	0.713667	0.617447	0.15464	0.0324612	0.0815565	0.0219323	0.0496979	0.340288	NO
P50135	Histamine N-methyltransferase	HNMT	8770.7	7846.4	8159.5	6750.7	6526.3	9745.1	7907.4	8355.2	7676.5	7585.2	9712.42	8314.12	8023.12	7495.79	7466.14	1	0.894615	0.930313	0.769688	0.744103	1.10737	0.947942	0.914763	0.85464	0.85126	0.107371	0.0533274	-0.01555	0.0849523	0.107157	0.337258	NO
Q02833	Ras association domain-containing protein 7	RASSF7	13518	11880	10046	10276	7638.1	15583	11179	11986	10324	9182.3	15530.7	11754	11509.6	10081	9038.18	1	0.878828	0.743157	0.760172	0.565032	1.14889	0.869507	0.851428	0.745744	0.668603	0.148893	-0.00932138	0.108271	-0.0144276	0.103571	0.336987	NO
Q7Z401	C-myc promoter-binding protein	DENND4A	16581	14116	11851	8815	7679.8	20014	13745	14477	9510.8	7138.6	19946.9	14452	13901.6	9286.91	7026.55	1	0.851336	0.714734	0.531633	0.463169	1.203	0.871599	0.838405	0.560094	0.423771	0.202996	0.0202627	0.123672	0.028461	-0.0393972	0.335994	NO
P15924	Desmoplakin	DSP	515760	146960	154400	130280	97694	366490	176870	291200	291330	104340	365261	185967	279626	284472	102702	1	0.284939	0.299364	0.252598	0.189418	0.708199	0.36057	0.542163	0.551559	0.199128	-0.291801	0.0756308	0.242799	0.298961	0.00971054	0.3353	NO
Q8TDP1	Ribonuclease H2 subunit C	RNASEH2C	35034	29240	27407	23955	20955	43107	30052	30705	23718	21445	42962.4	31597.7	29484.6	23159.7	21108.4	1	0.834618	0.782297	0.683764	0.598133	1.22631	0.901916	0.8416	0.661063	0.602512	0.226307	0.0672983	0.0593025	-0.0227018	0.00437876	0.334585	NO
Q6ZRV2	Protein FAM83H	FAM83H	6618.6	5904.3	5882.6	4359	4457.1	7511.9	5435.3	6718	5110.1	4869.6	7486.71	5714.87	6450.99	4989.81	4793.17	1	0.892077	0.888798	0.658598	0.67342	1.13116	0.863455	0.974675	0.753907	0.724197	0.131162	-0.0286215	0.0858773	0.095308	0.0507763	0.334502	NO
P46736	Lys-63-specific deubiquitinase BRCC36	BRCC3	70773	61844	63116	49320	43302	74668	65959	74263	49162	49626	74417.6	69351.6	71311.4	48004.7	48847.1	1	0.873836	0.891809	0.696876	0.611843	1.0515	0.979916	1.00761	0.678291	0.690194	0.0514968	0.10608	0.115798	-0.0185847	0.0783503	0.33314	NO
P62987	Ubiquitin-60S ribosomal protein L40;Ubiquitin;60S ribosomal protein L40	UBA52	69853	66633	58965	44887	53478	72567	67520	58001	53622	66753	72323.6	70992.9	55695.7	52359.7	65705.3	1	0.953903	0.84413	0.642592	0.765579	1.03537	1.01632	0.797327	0.74957	0.940622	0.035369	0.0624154	-0.0468026	0.106978	0.175043	0.333002	NO
Q8N5M1	ATP synthase mitochondrial F1 complex assembly factor 2	ATPAF2	30171	29887	27630	21896	21224	33193	31996	30163	24010	22033	33081.7	33641.7	28964.1	23444.8	21687.2	1	0.990587	0.91578	0.72573	0.703457	1.09647	1.11503	0.96	0.777064	0.718809	0.0964728	0.124448	0.0442195	0.0513338	0.0153517	0.331826	NO
Q9HB21	Pleckstrin homology domain-containing family A member 1	PLEKHA1	4265.9	3500.6	3574.5	2381.6	2414.7	5281.4	3760.7	3638.2	3020.3	1920.4	5263.69	3954.13	3493.6	2949.2	1890.26	1	0.820601	0.837924	0.558288	0.566047	1.2339	0.926916	0.818959	0.691343	0.443109	0.233899	0.106316	-0.0189652	0.133055	-0.122938	0.331366	NO
P52895	Aldo-keto reductase family 1 member C2	AKR1C2	14629	13827	12859	10915	8857.5	22976	13957	10421	11585	7081.2	22898.9	14674.9	10006.8	11312.3	6970.06	1	0.945177	0.879007	0.746121	0.605475	1.56531	1.00314	0.684039	0.773278	0.476455	0.565312	0.0579589	-0.194968	0.0271573	-0.129021	0.326439	NO
Q6UWP8	Suprabasin	SBSN	22792	14883	13921	12373	9951.3	22212	14910	16013	19004	9702.5	22137.5	15676.9	15376.5	18556.6	9550.21	1	0.652992	0.610784	0.542866	0.436614	0.971284	0.687825	0.674647	0.814173	0.419016	-0.0287159	0.0348323	0.0638623	0.271307	-0.0175977	0.323688	NO
P13693	Translationally-controlled tumor protein	TPT1	543050	488500	498970	348080	500180	619460	492530	455470	490360	511100	617383	517863	437367	478817	503078	1	0.899549	0.918829	0.640972	0.921057	1.13688	0.95362	0.80539	0.881717	0.926393	0.13688	0.0540712	-0.113439	0.240745	0.00533638	0.323593	NO
Q9Y2E5	Epididymis-specific alpha-mannosidase	MAN2B2	57217	58470	48604	49554	47311	77390	54234	49925	51679	47850	77130.5	57023.5	47940.7	50462.5	47099	1	1.0219	0.849468	0.866071	0.82687	1.34803	0.996619	0.837875	0.881949	0.823164	0.348034	-0.0252803	-0.0115929	0.0158773	-0.00370589	0.323332	NO
P14923	Junction plakoglobin	JUP	362100	239480	229430	165230	126370	358330	237280	302960	225390	123790	357128	249485	290919	220084	121847	1	0.661364	0.63361	0.45631	0.348992	0.98627	0.688993	0.803421	0.6078	0.336501	-0.0137303	0.0276292	0.169811	0.151489	-0.0124909	0.322708	NO
P11117	Lysosomal acid phosphatase	ACP2	3272.2	2740.5	2971.5	2528.1	2943.3	3735.1	2946	2951.3	2987.6	2982.4	3722.57	3097.53	2834	2917.27	2935.59	1	0.83751	0.908105	0.772599	0.899487	1.13764	0.946619	0.866083	0.891532	0.89713	0.137636	0.109109	-0.0420213	0.118932	-0.00235649	0.3213	NO
O75351	Vacuolar protein sorting-associated protein 4B	VPS4B	112410	96577	83980	58546	44880	113410	98502	104200	64532	53482	113030	103568	100058	63012.9	52642.6	1	0.85915	0.747087	0.520826	0.399253	1.00551	0.921346	0.890121	0.560563	0.468309	0.00551246	0.0621961	0.143034	0.0397374	0.0690558	0.319536	NO
Q13162	Peroxiredoxin-4	PRDX4	435740	396760	410450	318910	398720	523640	390330	377730	406050	414710	521884	410407	362717	396491	408201	1	0.910543	0.941961	0.731881	0.915041	1.1977	0.941861	0.832416	0.909927	0.936799	0.197696	0.0313184	-0.109545	0.178045	0.021758	0.319272	NO
Q7Z6K3	Protein prenyltransferase alpha subunit repeat-containing protein 1	PTAR1	67858	57949	62490	47579	42227	68592	56948	56931	49774	69251	68362	59877.1	54668.2	48602.3	68164.1	1	0.853974	0.920894	0.701155	0.622285	1.00743	0.882389	0.805627	0.716235	1.00451	0.00742671	0.0284142	-0.115267	0.01508	0.382225	0.31788	NO
Q96DC7	Transmembrane and coiled-coil domain-containing protein 6	TMCO6	58115	56965	51528	33839	30546	60966	57631	58135	42995	30754	60761.5	60595.3	55824.4	41982.9	30271.3	1	0.980212	0.886656	0.582277	0.525613	1.04554	1.04268	0.960585	0.72241	0.520886	0.0455397	0.0624668	0.0739288	0.140134	-0.00472694	0.317342	NO
O15488	Glycogenin-2	GYG2	34712	31634	31484	24017	20500	34520	33047	35214	26651	24732	34404.2	34746.8	33814.4	26023.6	24343.8	1	0.911327	0.907006	0.691893	0.590574	0.991134	1.001	0.974141	0.749701	0.701308	-0.00886639	0.0896744	0.067135	0.0578077	0.110734	0.316485	NO
Q8WUH1	Protein Churchill	CHURC1	75712	61912	63368	37985	28608	73782	58804	79028	46547	35261	73534.6	61828.6	75887	45451.3	34707.6	1	0.81773	0.836961	0.501704	0.377853	0.97124	0.816629	1.00231	0.600318	0.458415	-0.0287596	-0.00110164	0.16535	0.098614	0.0805626	0.314665	NO
P11234	Ras-related protein Ral-B	RALB	34438	27209	29306	23241	22056	39325	28878	32348	23797	23596	39193.1	30363.3	31062.3	23236.8	23225.6	1	0.790087	0.850979	0.674865	0.640455	1.13808	0.881681	0.901977	0.674743	0.674419	0.138078	0.0915949	0.0509989	-0.000121753	0.0339638	0.314513	NO
Q6AI08	HEAT repeat-containing protein 6	HEATR6	93859	87417	82388	70018	68430	101580	87398	94309	84133	66823	101239	91893.3	90560.6	82152.5	65774.2	1	0.931365	0.877785	0.745991	0.729072	1.07863	0.979057	0.964858	0.875275	0.700776	0.0786321	0.0476921	0.0870732	0.129284	-0.028296	0.314385	NO
P09871	Complement C1s subcomponent;Complement C1s subcomponent heavy chain;Complement C1s subcomponent light chain;Mannan-binding lectin serine protease 1;Mannan-binding lectin serine protease 1 heavy chain;Mannan-binding lectin serine protease 1 light chain	C1S;MASP1	7402.4	6670.1	6191.4	5680.2	4845.5	8524.8	7337	6883.2	5887.5	4592.5	8496.21	7714.38	6609.62	5748.91	4520.42	1	0.901073	0.836404	0.767346	0.654585	1.14776	1.04215	0.892902	0.776627	0.610669	0.147764	0.141073	0.0564981	0.0092815	-0.0439158	0.310701	NO
Q9UGY1	Nucleolar protein 12	NOL12	16037	12162	12065	8978.7	6867.8	18866	10930	13722	9560.9	8385	18802.7	11492.2	13176.6	9335.83	8253.39	1	0.758371	0.752323	0.559874	0.428247	1.17246	0.716604	0.821638	0.582143	0.514647	0.172459	-0.0417668	0.0693151	0.0222692	0.0863997	0.308677	NO
Q02447	Transcription factor Sp3	SP3	37683	30432	33958	34531	24669	47862	33354	39030	29363	24358	47701.5	35069.6	37478.7	28671.8	23975.7	1	0.807579	0.901149	0.916355	0.654645	1.26586	0.930647	0.994579	0.760868	0.636247	0.265862	0.123068	0.0934299	-0.155487	-0.0183986	0.308474	NO
Q9UIQ6	Leucyl-cystinyl aminopeptidase;Leucyl-cystinyl aminopeptidase, pregnancy serum form	LNPEP	22800	19792	16657	13120	13717	26325	19410	19483	14951	13361	26236.7	20408.4	18708.6	14599	13151.3	1	0.86807	0.73057	0.575439	0.601623	1.15073	0.895103	0.820554	0.640309	0.576811	0.150733	0.0270332	0.0899838	0.0648704	-0.0248119	0.307809	NO
Q9H3Y8	Pancreatic progenitor cell differentiation and proliferation factor	PPDPF	4517.2	4222	4472.8	4320.6	3922.8	5661.4	4654.7	4902.5	3920.3	3831.8	5642.41	4894.12	4707.65	3828.01	3771.66	1	0.93465	0.990171	0.956477	0.868414	1.2491	1.08344	1.04216	0.847431	0.834955	0.249095	0.14879	0.0519892	-0.109047	-0.0334594	0.307369	NO
Q14689	Disco-interacting protein 2 homolog A	DIP2A	18547	16908	17358	15206	14469	21519	18122	18434	16320	14263	21446.8	19054.1	17701.3	15935.8	14039.1	1	0.91163	0.935893	0.819863	0.780126	1.15635	1.02734	0.954404	0.859213	0.756949	0.15635	0.115712	0.0185111	0.0393497	-0.0231772	0.306746	NO
P30047	GTP cyclohydrolase 1 feedback regulatory protein	GCHFR	49614	45036	46915	35463	38981	53923	46620	47002	42389	42611	53742.2	49017.9	45133.9	41391.1	41942.2	1	0.907728	0.9456	0.714778	0.785685	1.08321	0.987985	0.9097	0.834263	0.84537	0.0832055	0.0802577	-0.0358999	0.119485	0.0596846	0.306733	NO
Q96FN4	Copine-2	CPNE2	9473.3	8656.6	8902.2	9245.9	8797.6	9004.7	8842.9	11821	8462.8	10253	8974.5	9297.74	11351.2	8263.58	10092.1	1	0.913789	0.939715	0.975996	0.928673	0.947347	0.981467	1.19823	0.872302	1.06532	-0.0526532	0.0676782	0.258512	-0.103693	0.136644	0.306488	NO
Q9NYP3	Protein downstream neighbor of Son	DONSON	65894	64606	56043	48128	46397	78784	68771	62227	51911	40630	78519.8	72308.2	59753.7	50689	39992.3	1	0.980453	0.850502	0.730385	0.704116	1.19161	1.09734	0.906816	0.76925	0.606918	0.191607	0.116888	0.0563137	0.0388653	-0.0971973	0.306478	NO
Q9H1E3	Nuclear ubiquitous casein and cyclin-dependent kinase substrate 1	NUCKS1	237010	213120	211930	165910	171050	254710	214860	223740	189980	194540	253856	225911	214847	185508	191487	1	0.899203	0.894182	0.700013	0.7217	1.07108	0.953172	0.90649	0.7827	0.807926	0.0710762	0.0539697	0.0123086	0.0826876	0.0862266	0.306269	NO
Q9BRT3	Migration and invasion enhancer 1	MIEN1	149760	124670	128810	93313	114300	214340	124520	126760	106220	87962	213621	130925	121722	103720	86581.4	1	0.832465	0.86011	0.623084	0.763221	1.42642	0.87423	0.812779	0.692572	0.578134	0.426423	0.0417649	-0.0473303	0.069488	-0.185087	0.305259	NO
P52565	Rho GDP-dissociation inhibitor 1	ARHGDIA	909030	789130	825070	659850	744470	1042700	788120	845900	786180	769060	1.0392e+06	828657	812279	767673	756989	1	0.868101	0.907638	0.725884	0.818972	1.1432	0.911584	0.893567	0.844497	0.832744	0.1432	0.0434827	-0.0140711	0.118613	0.0137719	0.304997	NO
O95297	Myelin protein zero-like protein 1	MPZL1	14941	10096	9620.8	7076	4720.5	16343	9974.2	11082	7997.2	5875.2	16288.2	10487.2	10641.5	7808.94	5782.98	1	0.675725	0.643919	0.473596	0.315943	1.09017	0.701909	0.712237	0.522652	0.387055	0.0901673	0.0261846	0.0683178	0.0490558	0.071112	0.304838	NO
P60709	Actin, cytoplasmic 1;Actin, cytoplasmic 1, N-terminally processed	ACTB	5726800	5191100	4960200	3868300	3848600	6478100	4940300	5173500	4616200	4274400	6.45637e+06	5.19441e+06	4.96787e+06	4.50753e+06	4.20731e+06	1	0.906457	0.866138	0.675473	0.672033	1.1274	0.907034	0.867478	0.787094	0.73467	0.127397	0.000577129	0.00134014	0.111621	0.0626371	0.303572	NO
Q64LD2	WD repeat-containing protein 25	WDR25	6544.9	5225.9	6021.5	4908.3	4387.6	6277.6	5549.1	6634.7	5654.8	5171.9	6256.55	5834.52	6371	5521.68	5090.72	1	0.798469	0.920029	0.749943	0.670385	0.955942	0.89146	0.973429	0.843662	0.777815	-0.0440577	0.0929913	0.0534001	0.0937193	0.107431	0.303484	NO
O94868	F-BAR and double SH3 domains protein 2	FCHSD2	11198	10379	9551.4	8118.7	7597.3	12412	11204	11671	8157.1	7024.4	12370.4	11780.3	11207.1	7965.08	6914.15	1	0.926862	0.852956	0.725013	0.678452	1.10469	1.052	1.00081	0.711295	0.617445	0.104695	0.125137	0.147859	-0.0137187	-0.0610067	0.302965	NO
Q8WZ73	E3 ubiquitin-protein ligase rififylin	RFFL	11826	10894	10651	9977.6	9366.1	13306	10451	11441	12884	8602.6	13261.4	10988.5	10986.3	12580.7	8467.58	1	0.921191	0.900643	0.8437	0.791992	1.12137	0.929186	0.928993	1.06382	0.716014	0.121375	0.007995	0.02835	0.220117	-0.0759787	0.301858	NO
Q01432	AMP deaminase 3	AMPD3	112240	103300	108050	82736	82457	120690	97848	125080	95240	87747	120285	102881	120109	92998	86369.7	1	0.920349	0.962669	0.737135	0.734649	1.07168	0.916615	1.07011	0.828564	0.76951	0.0716789	-0.00373461	0.107436	0.0914291	0.0348605	0.30167	NO
Q66K89	Transcription factor E4F1	E4F1	10552	8926.4	8980.7	8634	6730.4	10799	10060	8691.5	8479.3	9182	10762.8	10577.4	8346.05	8279.69	9037.88	1	0.845944	0.85109	0.818234	0.637832	1.01998	1.00241	0.790945	0.784656	0.856509	0.0199757	0.156467	-0.0601451	-0.0335772	0.218677	0.301397	NO
Q7Z6V5	tRNA-specific adenosine deaminase 2	ADAT2	100170	93756	87339	82377	73428	128040	93138	93108	83331	72031	127611	97928.6	89407.3	81369.3	70900.4	1	0.935969	0.871908	0.822372	0.733034	1.27394	0.977624	0.892556	0.812313	0.707801	0.27394	0.0416549	0.0206483	-0.0100594	-0.0252329	0.300951	NO
Q6P3S6	F-box only protein 42	FBXO42	7229.2	7476.5	7177.2	5741.4	5456.3	8897.4	8084	7127.7	6027.5	5229.2	8867.56	8499.8	6844.4	5885.61	5147.12	1	1.03421	0.992807	0.794196	0.754758	1.22663	1.17576	0.946772	0.814144	0.711991	0.226631	0.141551	-0.0460351	0.0199482	-0.0427677	0.299328	NO
Q9UHA4	Ragulator complex protein LAMTOR3	LAMTOR3	50712	49483	47370	40778	39072	58691	45559	51169	43366	45372	58494.2	47902.3	49135.2	42345.1	44659.9	1	0.975765	0.934098	0.804109	0.770469	1.15346	0.944596	0.968908	0.835012	0.880657	0.153458	-0.0311695	0.0348092	0.0309028	0.110188	0.298189	NO
Q8IUC4	Rhophilin-2	RHPN2	176030	178200	164360	122120	125680	165770	202530	190380	143380	119620	165214	212947	182813	140005	117742	1	1.01233	0.933704	0.693745	0.713969	0.938556	1.20972	1.03853	0.795346	0.668877	-0.0614438	0.197393	0.10483	0.101601	-0.0450919	0.297288	NO
Q8NHM5	Lysine-specific demethylase 2B	KDM2B	3303.2	2866.4	2563.4	4103.9	2497.4	4279.8	3262.7	3450.5	3183.2	2233	4265.45	3430.52	3313.36	3108.27	2197.95	1	0.867765	0.776035	1.2424	0.756055	1.29131	1.03854	1.00307	0.940986	0.665401	0.291307	0.170779	0.227039	-0.301415	-0.0906541	0.297057	NO
Q9C099	Leucine-rich repeat and coiled-coil domain-containing protein 1	LRRCC1	2985.8	2706.7	2553.7	2904.5	2301.4	3537.4	2397	3074.4	2009.7	3425.5	3525.54	2520.29	2952.21	1962.39	3371.73	1	0.906524	0.855282	0.972771	0.770782	1.18077	0.844092	0.988749	0.657241	1.12926	0.180768	-0.0624322	0.133467	-0.31553	0.358475	0.294747	NO
P00374	Dihydrofolate reductase	DHFR	221790	174310	126110	69746	47618	240270	172660	156040	87289	49602	239464	181541	149838	85234.2	48823.5	1	0.785924	0.568601	0.314469	0.214699	1.07969	0.818526	0.675585	0.384301	0.220134	0.0796889	0.032602	0.106984	0.0698326	0.00543515	0.294543	NO
Q9Y421	Protein FAM32A	FAM32A	31431	30736	31330	38361	30068	33809	36197	33879	38384	29876	33695.6	38058.8	32532.4	37480.4	29407.1	1	0.977888	0.996787	1.22048	0.956635	1.07205	1.21087	1.03504	1.19247	0.935607	0.0720503	0.23298	0.0382568	-0.0280162	-0.0210278	0.294243	NO
Q99497	Protein deglycase DJ-1	PARK7	1187300	1124300	1066800	865230	972020	1250000	1167100	1073400	963210	1137600	1.24581e+06	1.22713e+06	1.03074e+06	940536	1.11974e+06	1	0.946938	0.898509	0.728737	0.818681	1.04928	1.03355	0.868135	0.792163	0.943102	0.0492781	0.0866082	-0.0303741	0.0634259	0.124421	0.293359	NO
O43504	Ragulator complex protein LAMTOR5	LAMTOR5	72660	63675	66560	52645	56276	77004	62312	72717	64044	59363	76745.8	65517	69826.8	62536.4	58431.3	1	0.876342	0.916047	0.724539	0.774511	1.05623	0.901693	0.961007	0.860671	0.804174	0.0562311	0.0253513	0.0449601	0.136132	0.0296622	0.292337	NO
Q9Y3E1	Hepatoma-derived growth factor-related protein 3	HDGFRP3	58724	54145	57289	50498	48620	63366	54502	63665	53784	53165	63153.5	57305.3	61134.6	52517.9	52330.5	1	0.922025	0.975564	0.859921	0.827941	1.07543	0.975842	1.04105	0.894317	0.891127	0.0754289	0.0538165	0.0654856	0.0343965	0.063186	0.292314	NO
Q9H3H1	tRNA dimethylallyltransferase, mitochondrial	TRIT1	80151	66590	47181	35218	28087	95032	58221	54788	40506	32976	94713.3	61215.6	52610.4	39552.5	32458.4	1	0.830807	0.588651	0.439396	0.350426	1.18169	0.763753	0.656391	0.493474	0.404966	0.181686	-0.0670534	0.0677397	0.0540788	0.0545398	0.290991	NO
Q03252	Lamin-B2	LMNB2	201520	184750	186220	149730	125300	214530	207510	196200	157170	134150	213811	218183	188402	153470	132044	1	0.916782	0.924077	0.743003	0.621775	1.06099	1.08269	0.934904	0.761563	0.655242	0.0609891	0.165906	0.010827	0.0185597	0.0334677	0.289749	NO
Q07021	Complement component 1 Q subcomponent-binding protein, mitochondrial	C1QBP	324010	274920	291220	219090	235070	339580	277720	330470	255360	244770	338441	292005	317335	249349	240928	1	0.848492	0.898799	0.676183	0.725502	1.04454	0.901221	0.979399	0.769571	0.743582	0.0445392	0.0527285	0.0805999	0.0933882	0.0180802	0.289336	NO
Q9H9Q4	Non-homologous end-joining factor 1	NHEJ1	42775	38737	37846	32807	33799	49257	36812	37678	38086	37726	49091.8	38705.4	36180.5	37189.4	37133.9	1	0.905599	0.884769	0.766967	0.790158	1.14768	0.904861	0.845832	0.86942	0.868121	0.147675	-0.000738025	-0.0389374	0.102453	0.0779629	0.288416	NO
Q14657	EKC/KEOPS complex subunit LAGE3	LAGE3	89130	78279	82212	66088	65587	104140	72949	86105	76888	69833	103791	76701.1	82682.7	75078	68736.9	1	0.878256	0.922383	0.741479	0.735858	1.16449	0.860554	0.927664	0.842343	0.771198	0.164487	-0.0177029	0.00528084	0.100864	0.0353408	0.28827	NO
P56211	cAMP-regulated phosphoprotein 19	ARPP19	113560	98134	105360	89276	80522	131060	94700	120470	91186	85964	130620	99570.9	115682	89039.4	84614.7	1	0.86416	0.927791	0.786157	0.70907	1.15023	0.876813	1.01868	0.784074	0.74511	0.150233	0.0126533	0.090893	-0.00208315	0.0360403	0.287736	NO
Q5M9N0	Coiled-coil domain-containing protein 158	CCDC158	13868	9801.2	11922	9969.7	4066.5	18256	10207	12755	9019.6	3693.4	18194.8	10732	12248	8807.27	3635.43	1	0.706749	0.859677	0.7189	0.293229	1.312	0.773868	0.883187	0.635079	0.262145	0.311997	0.0671184	0.0235103	-0.0838207	-0.0310838	0.287721	NO
Q15544	Transcription initiation factor TFIID subunit 11	TAF11	10335	9041.5	9678	7927.4	7528.8	11409	9261.4	10955	8866.3	7313	11370.7	9737.76	10519.6	8657.58	7198.22	1	0.874843	0.93643	0.767044	0.728476	1.10022	0.942212	1.01786	0.837695	0.696489	0.100216	0.0673693	0.0814305	0.0706515	-0.0319867	0.287681	NO
Q9Y680	Peptidyl-prolyl cis-trans isomerase FKBP7	FKBP7	118800	114450	114410	90773	96724	124660	112550	126050	106840	102990	124242	118339	121040	104325	101373	1	0.963384	0.963047	0.764082	0.814175	1.04581	0.99612	1.01886	0.878156	0.853312	0.0458075	0.0327359	0.0558084	0.114074	0.0391372	0.287562	NO
O75264	Small integral membrane protein 24	SMIM24	6775.9	6563	6870.1	4711.5	5061.9	8898.7	5837.1	6376	5961.4	5059.3	8868.86	6137.33	6122.58	5821.07	4979.89	1	0.96858	1.0139	0.695332	0.747045	1.30888	0.905759	0.903582	0.859084	0.734942	0.308882	-0.0628209	-0.11032	0.163752	-0.0121031	0.28739	NO
Q9NRF9	DNA polymerase epsilon subunit 3	POLE3	263090	221110	221000	184100	188070	271290	216160	250550	227820	195280	270380	227278	240592	222457	192215	1	0.840435	0.840017	0.699761	0.71485	1.02771	0.86388	0.914484	0.845555	0.730605	0.0277098	0.0234453	0.0744676	0.145794	0.0157548	0.287172	NO
P61006	Ras-related protein Rab-8A	RAB8A	177940	162730	155550	122640	119950	191210	156610	168030	147050	131740	190569	164665	161352	143588	129672	1	0.914522	0.874171	0.689221	0.674104	1.07097	0.925398	0.906775	0.806948	0.728741	0.0709719	0.0108759	0.0326037	0.117727	0.0546378	0.286816	NO
Q9BSH5	Haloacid dehalogenase-like hydrolase domain-containing protein 3	HDHD3	48746	43372	45878	40932	40503	65957	42671	47161	40126	38939	65735.8	44865.8	45286.5	39181.4	38327.8	1	0.889755	0.941164	0.8397	0.830899	1.34854	0.920399	0.929031	0.803787	0.786276	0.348537	0.0306444	-0.0121334	-0.0359124	-0.0446226	0.286513	NO
Q9NUW8	Tyrosyl-DNA phosphodiesterase 1	TDP1	192080	164410	151250	111220	88401	214210	156660	166610	130220	98444	213492	164718	159988	127155	96898.9	1	0.855945	0.787432	0.57903	0.46023	1.11147	0.857548	0.832923	0.661987	0.504471	0.111472	0.00160262	0.0454911	0.0829579	0.0442412	0.285765	NO
O75143	Autophagy-related protein 13	ATG13	19974	21150	18681	14312	13441	24525	20138	18024	15147	15785	24442.8	21173.8	17307.6	14790.4	15537.2	1	1.05888	0.935266	0.716531	0.672925	1.22373	1.06007	0.866507	0.740484	0.777873	0.223728	0.00119161	-0.0687584	0.0239528	0.104949	0.285063	NO
P02794	Ferritin heavy chain;Ferritin heavy chain, N-terminally processed	FTH1	332570	292680	250940	222470	254090	415370	277550	273130	244120	244930	413977	291826	262274	238373	241086	1	0.880055	0.754548	0.668942	0.76402	1.24478	0.877487	0.788629	0.716761	0.724917	0.244781	-0.0025684	0.0340807	0.0478194	-0.0391026	0.285011	NO
Q86WX3	Active regulator of SIRT1	RPS19BP1	3571.3	3407.5	3491.7	2834.4	3045.9	3978	4033.7	3876.1	2510.4	3033.5	3964.66	4241.17	3722.04	2451.3	2985.89	1	0.954134	0.977711	0.793661	0.852883	1.11014	1.18757	1.04221	0.68639	0.836078	0.110144	0.233437	0.0644978	-0.107271	-0.0168042	0.284004	NO
Q969Q0	60S ribosomal protein L36a-like	RPL36AL	90174	72685	48268	40005	47742	135020	59965	35442	50632	43973	134567	63049.3	34033.3	49440.1	43282.8	1	0.806053	0.535276	0.443642	0.529443	1.49231	0.699196	0.377418	0.548274	0.479992	0.492306	-0.106857	-0.157858	0.104632	-0.0494509	0.282773	NO
Q9P1Y6	PHD and RING finger domain-containing protein 1	PHRF1	43407	39511	41552	30858	32820	43942	40799	49468	33190	34356	43794.6	42897.5	47501.9	32408.7	33816.8	1	0.910245	0.957265	0.710899	0.756099	1.00893	0.988262	1.09434	0.746624	0.779062	0.00893015	0.0780174	0.137071	0.0357245	0.0229631	0.282706	NO
Q8WUR7	UPF0235 protein C15orf40	C15orf40	45221	36127	41150	29804	31523	48268	36017	44445	35822	33483	48106.1	37869.5	42678.5	34978.7	32957.5	1	0.798899	0.909975	0.659074	0.697088	1.0638	0.837433	0.943776	0.773506	0.728809	0.0638005	0.0385339	0.0338005	0.114432	0.0317211	0.282288	NO
Q8WXH0	Nesprin-2	SYNE2	57362	47882	53930	46635	44588	66294	48194	54582	52452	46895	66071.7	50672.9	52412.6	51217.3	46158.9	1	0.834734	0.940169	0.812995	0.777309	1.15184	0.883387	0.913716	0.892878	0.804696	0.151837	0.0486536	-0.0264532	0.0798831	0.0273866	0.281307	NO
Q8WY54	Protein phosphatase 1E	PPM1E	143180	135150	118380	97039	91692	154500	132090	132190	112230	97703	153982	138884	126936	109588	96169.5	1	0.943917	0.826791	0.677741	0.640397	1.07544	0.969996	0.886548	0.765387	0.671668	0.0754425	0.0260795	0.0597569	0.0876453	0.0312717	0.280196	NO
Q05D32	CTD small phosphatase-like protein 2	CTDSPL2	3878.3	3304.4	3125.5	3604.3	2737.5	4444.5	3366.2	3828.8	3465.3	2750.1	4429.59	3539.34	3676.62	3383.73	2706.94	1	0.852023	0.805894	0.92935	0.705851	1.14215	0.912601	0.947998	0.872476	0.69797	0.142148	0.0605784	0.142104	-0.0568741	-0.00788098	0.280075	NO
P29966	Myristoylated alanine-rich C-kinase substrate	MARCKS	322000	275590	281960	215460	221270	350650	265980	305740	251350	242000	349474	279661	293588	245433	238202	1	0.85587	0.875652	0.66913	0.687174	1.08532	0.868512	0.911764	0.762215	0.739757	0.085323	0.012642	0.0361121	0.0930842	0.0525827	0.279744	NO
P43487	Ran-specific GTPase-activating protein	RANBP1	2000800	1709100	1761400	1339700	1451600	2373000	1708700	1767900	1582900	1438200	2.36504e+06	1.79659e+06	1.69763e+06	1.54564e+06	1.41563e+06	1	0.854208	0.880348	0.669582	0.72551	1.18205	0.897934	0.848477	0.77251	0.70753	0.182048	0.0437261	-0.0318706	0.102928	-0.0179796	0.278852	NO
Q6PCT2	F-box/LRR-repeat protein 19	FBXL19	13190	11510	9277	8451.8	6463.5	14026	10875	11632	9548.6	6769.3	13979	11434.4	11169.7	9323.82	6663.05	1	0.872631	0.703336	0.640773	0.49003	1.05982	0.866896	0.846829	0.706886	0.505159	0.0598151	-0.00573485	0.143493	0.0661123	0.015129	0.278815	NO
Q7Z7C8	Transcription initiation factor TFIID subunit 8	TAF8	58506	55193	52390	47814	45128	63312	56812	57355	50636	48705	63099.7	59734.1	55075.4	49444	47940.5	1	0.943373	0.895464	0.81725	0.77134	1.07852	1.02099	0.941363	0.84511	0.819412	0.0785162	0.0776183	0.0458991	0.0278605	0.0480727	0.277967	NO
Q9Y3B2	Exosome complex component CSL4	EXOSC1	245250	234420	205830	122910	147770	268120	236830	220830	161640	140430	267221	249011	212053	157835	138226	1	0.955841	0.839266	0.501162	0.602528	1.08959	1.01534	0.86464	0.643567	0.563612	0.0895853	0.059496	0.0253738	0.142405	-0.038916	0.277944	NO
Q9Y2G2	Caspase recruitment domain-containing protein 8	CARD8	50690	44065	41861	35259	34305	55574	42398	50260	38133	35356	55387.6	44578.7	48262.4	37235.3	34801.1	1	0.869304	0.825824	0.695581	0.676761	1.09267	0.879439	0.952108	0.73457	0.686547	0.0926735	0.0101351	0.126285	0.0389886	0.0097862	0.277868	NO
O75528	Transcriptional adapter 3	TADA3	8003.9	6588.7	5864	4054.6	3534.2	9084.5	6854.7	6435.4	4810.2	3181.1	9054.03	7207.27	6179.62	4696.97	3131.17	1	0.823186	0.732643	0.506578	0.44156	1.1312	0.90047	0.772076	0.586835	0.391206	0.131203	0.0772839	0.0394332	0.0802566	-0.0503542	0.277822	NO
Q32NC0	UPF0711 protein C18orf21	C18orf21	16448	14696	13958	10956	10269	18971	14139	14458	12429	11280	18907.4	14866.2	13883.4	12136.4	11103	1	0.893482	0.848614	0.666099	0.624331	1.14952	0.903833	0.844076	0.737866	0.675034	0.149524	0.0103503	-0.0045383	0.0717665	0.0507024	0.277805	NO
Q9BRQ3	Nucleoside diphosphate-linked moiety X motif 22	NUDT22	18081	15497	15227	14172	13065	20972	16572	16101	14276	13543	20901.7	17424.4	15461.1	13939.9	13330.4	1	0.857088	0.842155	0.783806	0.722582	1.156	0.963685	0.855099	0.770972	0.737262	0.156002	0.106597	0.0129446	-0.0128347	0.0146802	0.277389	NO
A6NKF1	SAC3 domain-containing protein 1	SAC3D1	4476.3	4920.1	4692.6	4410.2	4239.4	5577.8	5051.4	5474.4	4330.4	3682.4	5559.09	5311.22	5256.82	4228.46	3624.6	1	1.09914	1.04832	0.985233	0.947077	1.24189	1.18652	1.17437	0.944633	0.809732	0.241895	0.0873756	0.126045	-0.0406004	-0.137345	0.27737	NO
Q01844	RNA-binding protein EWS	EWSR1	327790	325740	317670	277630	342830	409470	318210	313500	296600	354420	408097	334577	301040	289618	348857	1	0.993746	0.969127	0.846975	1.04588	1.24499	1.02071	0.918392	0.883547	1.06427	0.244995	0.0269599	-0.0507347	0.0365719	0.0183872	0.276179	NO
P50548	ETS domain-containing transcription factor ERF	ERF	19718	16967	17067	14304	11696	23572	15907	17420	15535	13286	23492.9	16725.2	16727.6	15169.3	13077.5	1	0.860483	0.865554	0.725429	0.593164	1.19145	0.848219	0.848343	0.769312	0.663225	0.191447	-0.012264	-0.0172113	0.0438837	0.0700612	0.275916	NO
P0DJD0	RANBP2-like and GRIP domain-containing protein 1;RANBP2-like and GRIP domain-containing protein 2	RGPD1;RGPD2	8503.4	10497	7827.6	7021.7	6052	10470	10770	7537.1	7616.4	5898.6	10434.9	11324	7237.53	7437.11	5806.02	1	1.23445	0.920526	0.825752	0.711715	1.22714	1.3317	0.851134	0.874604	0.682788	0.227143	0.0972501	-0.0693921	0.0488518	-0.0289276	0.274925	NO
Q9BUE0	Mediator of RNA polymerase II transcription subunit 18	MED18	57282	53576	48882	43337	41849	60437	63250	50040	42607	44977	60234.3	66503.3	48051.1	41604	44271.1	1	0.935303	0.853357	0.756555	0.730579	1.05154	1.16098	0.838852	0.726302	0.772862	0.05154	0.225678	-0.0145051	-0.0302536	0.042283	0.274742	NO
O43768	Alpha-endosulfine	ENSA	397980	399400	382680	294660	341590	388940	409520	395910	359520	382130	387636	430584	380174	351057	376132	1	1.00357	0.961556	0.740389	0.858309	0.974008	1.08192	0.95526	0.882096	0.945103	-0.0259922	0.078355	-0.00629627	0.141707	0.0867938	0.274568	NO
P09429	High mobility group protein B1;Putative high mobility group protein B1-like 1	HMGB1;HMGB1P1	1807100	1666600	1677400	1270500	1612900	2023700	1656800	1560000	1601900	1736300	2.01691e+06	1.74202e+06	1.498e+06	1.56419e+06	1.70905e+06	1	0.922251	0.928228	0.70306	0.892535	1.1161	0.963985	0.82895	0.86558	0.94574	0.116105	0.0417341	-0.0992771	0.16252	0.0532054	0.274288	NO
Q9NZM4	Glioma tumor suppressor candidate region gene 1 protein	GLTSCR1	29884	27536	27728	21779	19413	31041	27108	28893	25348	22938	30936.9	28502.3	27744.6	24751.3	22578	1	0.92143	0.927854	0.728785	0.649612	1.03523	0.953765	0.928411	0.828246	0.75552	0.0352328	0.0323352	0.000556229	0.0994611	0.105909	0.273494	NO
Q9BSW2	EF-hand calcium-binding domain-containing protein 4B	CRACR2A	10284	10189	9141.3	8840.6	6570.5	12580	10306	9791.4	8498.1	6866.8	12537.8	10836.1	9402.23	8298.05	6759.02	1	0.990762	0.888886	0.859646	0.638905	1.21916	1.05368	0.914258	0.806889	0.657237	0.219157	0.0629221	0.0253726	-0.0527567	0.0183315	0.273026	NO
Q6V1X1	Dipeptidyl peptidase 8	DPP8	26996	22985	24236	20423	18783	31240	22184	25541	23111	19546	31135.2	23325	24525.9	22567	19239.2	1	0.851422	0.897763	0.756519	0.69577	1.15333	0.864018	0.908499	0.835937	0.712669	0.153328	0.0125958	0.0107368	0.0794175	0.0168992	0.272977	NO
Q9BQ70	Transcription factor 25	TCF25	18853	15796	16005	12101	12347	21451	17054	17151	13280	11680	21379.1	17931.2	16469.3	12967.4	11496.7	1	0.837851	0.848937	0.641861	0.654909	1.13399	0.951105	0.873565	0.687815	0.609806	0.133987	0.113254	0.0246284	0.0459546	-0.045103	0.272721	NO
Q8IX04	Ubiquitin-conjugating enzyme E2 variant 3	UEVLD	86425	79452	76039	62671	59103	93965	81412	81883	70577	61428	93649.9	85599.4	78628.5	68915.6	60463.8	1	0.919317	0.879826	0.725149	0.683865	1.0836	0.990448	0.909789	0.797403	0.699611	0.083597	0.0711303	0.0299623	0.0722544	0.0157459	0.27269	NO
O43583	Density-regulated protein	DENR	291490	252720	281420	220120	239010	338760	251880	281790	250500	250330	337624	264835	270590	244603	246401	1	0.866994	0.965453	0.755155	0.81996	1.15827	0.908558	0.928299	0.839148	0.845315	0.158269	0.041564	-0.0371539	0.083993	0.0253556	0.272028	NO
O00512	B-cell CLL/lymphoma 9 protein	BCL9	22518	21357	20147	17015	18091	26091	21165	20958	18657	18945	26003.5	22253.6	20125	18217.8	18647.6	1	0.948441	0.894706	0.755618	0.803402	1.15479	0.988259	0.89373	0.809033	0.828122	0.154787	0.0398181	-0.000976735	0.0534153	0.02472	0.271764	NO
Q16762	Thiosulfate sulfurtransferase	TST	117870	112970	118540	105100	92929	131910	116670	127630	108770	97813	131468	122671	122557	106210	96277.8	1	0.958429	1.00568	0.89166	0.788402	1.11536	1.04073	1.03977	0.901073	0.816813	0.115361	0.082302	0.0340819	0.00941292	0.0284106	0.269569	NO
O43715	TP53-regulated inhibitor of apoptosis 1	TRIAP1	98816	83161	90326	78503	73095	102270	85073	99501	82462	84401	101927	89448.7	95546.2	80520.8	83076.3	1	0.841574	0.914083	0.794436	0.739708	1.03148	0.905205	0.966911	0.814856	0.840717	0.0314829	0.0636308	0.0528279	0.0204198	0.101009	0.26937	NO
Q96HQ2	CDKN2AIP N-terminal-like protein	CDKN2AIPNL	24667	22186	23335	18153	18800	23266	23010	24305	20844	23071	23188	24193.5	23339	20353.3	22708.9	1	0.89942	0.946001	0.735922	0.762152	0.94004	0.980805	0.946162	0.825124	0.920618	-0.0599598	0.081385	0.000161204	0.089201	0.158466	0.269254	NO
Q9UER7	Death domain-associated protein 6	DAXX	70135	80464	62009	55344	52832	94179	77558	60212	62068	46553	93863.2	81547.2	57818.8	60606.9	45822.3	1	1.14727	0.884138	0.789107	0.75329	1.33832	1.16272	0.824393	0.864146	0.653345	0.338321	0.0154446	-0.0597445	0.0750394	-0.0999456	0.269115	NO
Q9NTM9	Copper homeostasis protein cutC homolog	CUTC	133360	112450	114470	89277	93978	144430	108130	122110	111180	97474	143946	113692	117257	108563	95944.1	1	0.843206	0.858353	0.669444	0.704694	1.07938	0.852517	0.879249	0.814058	0.719437	0.0793763	0.00931076	0.0208956	0.144614	0.0147426	0.26894	NO
Q17R31	Putative deoxyribonuclease TATDN3	TATDN3	137020	117960	128780	101610	103390	150250	112000	137410	119680	110980	149746	117761	131949	116863	109238	1	0.860896	0.939863	0.741571	0.754561	1.09288	0.859442	0.962987	0.852888	0.797242	0.0928777	-0.00145426	0.0231245	0.111317	0.0426806	0.268546	NO
Q8N371	Lysine-specific demethylase 8	KDM8	64683	61832	61261	55752	51087	78074	63607	59997	56460	55387	77812.2	66878.6	57612.4	55130.9	54517.7	1	0.955924	0.947096	0.861927	0.789806	1.20298	1.03394	0.890688	0.852324	0.842844	0.202977	0.0780211	-0.0564079	-0.00960215	0.0530381	0.268026	NO
Q9BU89	Deoxyhypusine hydroxylase	DOHH	122900	110110	104990	88743	86787	139570	109770	116480	97144	86460	139102	115416	111850	94857.2	85102.9	1	0.895932	0.854272	0.722075	0.706159	1.13183	0.939105	0.910093	0.771824	0.692457	0.13183	0.0431736	0.055821	0.0497493	-0.0137026	0.266871	NO
P62834	Ras-related protein Rap-1A	RAP1A	36916	32423	33479	25550	28346	39195	32869	35176	30575	29723	39063.6	34559.6	33777.9	29855.2	29256.5	1	0.878291	0.906897	0.692112	0.767851	1.05817	0.936169	0.914993	0.808735	0.792515	0.058174	0.0578779	0.00809673	0.116623	0.0246635	0.265435	NO
P53634	Dipeptidyl peptidase 1;Dipeptidyl peptidase 1 exclusion domain chain;Dipeptidyl peptidase 1 heavy chain;Dipeptidyl peptidase 1 light chain	CTSC	566600	512730	531770	404380	442020	596680	511020	542740	477600	495460	594679	537304	521168	466357	487683	1	0.904924	0.938528	0.713696	0.780127	1.04956	0.948296	0.919817	0.82308	0.860719	0.0495568	0.0433717	-0.018711	0.109384	0.080592	0.264194	NO
Q96C57	Uncharacterized protein C12orf43	C12orf43	44416	57701	43664	50404	44668	66171	54036	43710	49929	39683	65949.1	56815.4	41972.7	48753.6	39060.1	1	1.2991	0.983069	1.13482	1.00567	1.4848	1.27916	0.944991	1.09766	0.879416	0.484805	-0.0199399	-0.0380784	-0.0371567	-0.126257	0.263372	NO
P54920	Alpha-soluble NSF attachment protein	NAPA	213410	193750	181260	138320	112680	241740	190060	191150	159270	117580	240929	199836	183553	155521	115734	1	0.907877	0.849351	0.648142	0.527998	1.12895	0.936394	0.860094	0.728741	0.542311	0.12895	0.0285168	0.0107426	0.0805993	0.0143128	0.263122	NO
Q9BT23	LIM domain-containing protein 2	LIMD2	4966.7	4421.1	4362.3	3301.3	2146.6	6211.5	4329.3	4199.6	3338.4	2509	6190.67	4551.98	4032.68	3259.81	2469.62	1	0.890148	0.87831	0.664687	0.432198	1.24643	0.9165	0.811944	0.656334	0.497235	0.246435	0.0263511	-0.0663654	-0.00835314	0.065037	0.263105	NO
P54727	UV excision repair protein RAD23 homolog B	RAD23B	500430	502020	466120	415490	475590	582130	511690	460330	471420	478150	580178	538009	442034	460323	470645	1	1.00318	0.931439	0.830266	0.950363	1.15936	1.07509	0.883308	0.919854	0.940481	0.159358	0.0719159	-0.048131	0.089588	-0.00988132	0.26285	NO
O60313	Dynamin-like 120 kDa protein, mitochondrial;Dynamin-like 120 kDa protein, form S1	OPA1	126390	99226	81766	63043	48848	143210	100600	95165	67259	47612	142730	105774	91382.6	65675.7	46864.7	1	0.785078	0.646934	0.498797	0.386486	1.12928	0.836889	0.723021	0.519627	0.370794	0.12928	0.0518109	0.0760866	0.0208299	-0.0156919	0.262316	NO
Q8N4B1	Sesquipedalian-1	FAM109A	7262	6816.4	7193.5	5465.4	5580.4	8872.8	7388.5	7315.7	5924.7	4875.5	8843.04	7768.53	7024.93	5785.23	4798.98	1	0.938639	0.990567	0.752603	0.768438	1.21771	1.06975	0.967355	0.796644	0.660834	0.217715	0.131111	-0.0232125	0.0440415	-0.107605	0.26205	NO
Q96T21	Selenocysteine insertion sequence-binding protein 2	SECISBP2	34764	34197	32891	36799	33655	46804	33891	34887	38072	28891	46647	35634.2	33500.4	37175.8	28437.5	1	0.98369	0.946122	1.05854	0.968099	1.34182	1.02503	0.963652	1.06938	0.818017	0.34182	0.0413413	0.0175292	0.0108378	-0.150082	0.261446	NO
Q8WW38	Zinc finger protein ZFPM2	ZFPM2	45757	48054	45325	34621	29377	50627	48524	44944	37654	34196	50457.2	51019.8	43157.7	36767.6	33659.3	1	1.0502	0.990559	0.756627	0.642022	1.10272	1.11502	0.943193	0.803541	0.735609	0.102721	0.0648172	-0.0473663	0.0469132	0.0935872	0.260672	NO
Q9BQE9	B-cell CLL/lymphoma 7 protein family member B	BCL7B	15914	16613	14387	14315	9318	19211	16441	18663	11969	8791.2	19146.6	17286.6	17921.2	11687.2	8653.22	1	1.04392	0.904047	0.899522	0.585522	1.20313	1.08625	1.12613	0.7344	0.543749	0.203128	0.0423304	0.222083	-0.165122	-0.0417735	0.260645	NO
P49459	Ubiquitin-conjugating enzyme E2 A	UBE2A	91326	90198	84436	73453	74837	88392	94605	95596	84321	77558	88095.6	99471	91796.5	82336	76340.7	1	0.987649	0.924556	0.804295	0.819449	0.964627	1.08919	1.00515	0.901562	0.835914	-0.0353726	0.101538	0.0805954	0.0972674	0.0164649	0.260493	NO
P23297	Protein S100-A1	S100A1	26770	22879	24117	18536	19267	28945	22642	26187	22463	19107	28847.9	23806.6	25146.2	21934.2	18807.1	1	0.854651	0.900897	0.692417	0.719724	1.07762	0.889301	0.939342	0.819358	0.702544	0.0776215	0.0346505	0.0384451	0.126941	-0.0171796	0.260478	NO
P82970	High mobility group nucleosome-binding domain-containing protein 5	HMGN5	1022200	779980	878040	601960	668240	1085900	781950	946170	756570	675490	1.08226e+06	822170	908564	738760	664888	1	0.763041	0.858971	0.588887	0.653727	1.05875	0.804314	0.888832	0.722716	0.650448	0.0587539	0.0412734	0.0298607	0.133829	-0.00327949	0.260438	NO
Q96GX2	Putative ataxin-7-like protein 3B	ATXN7L3B	41053	37552	36024	29248	25418	43874	40158	39952	34783	22050	43726.9	42223.5	38364.1	33964.2	21703.9	1	0.91472	0.8775	0.712445	0.619151	1.06513	1.02851	0.934501	0.827325	0.52868	0.0651319	0.113793	0.0570013	0.114881	-0.0904706	0.260336	NO
Q9BV57	1,2-dihydroxy-3-keto-5-methylthiopentene dioxygenase	ADI1	540150	535140	418160	338660	392340	446920	542980	516370	372580	496430	445421	570908	495846	363809	488638	1	0.990725	0.774155	0.626974	0.726354	0.824625	1.05694	0.917979	0.673534	0.904634	-0.175375	0.0662191	0.143824	0.0465598	0.17828	0.259508	NO
P56645	Period circadian protein homolog 3	PER3	33890	31662	29934	25518	25714	34035	31941	32264	28694	29468	33920.9	33583.9	30981.6	28018.5	29005.5	1	0.934258	0.883269	0.752965	0.758749	1.00091	0.990968	0.914182	0.826749	0.855871	0.000910485	0.0567097	0.0309129	0.0737837	0.0971224	0.259439	NO
Q96C90	Protein phosphatase 1 regulatory subunit 14B	PPP1R14B	64740	56221	56866	41526	35160	70946	53645	62363	47651	38355	70708.1	56404.2	59884.3	46529.3	37753	1	0.868412	0.878375	0.641427	0.543095	1.09219	0.871242	0.924997	0.71871	0.583148	0.0921852	0.00283038	0.0466223	0.0772826	0.0400524	0.258973	NO
Q9UI14	Prenylated Rab acceptor protein 1	RABAC1	14584	13650	13782	13076	11204	17198	13507	15840	12164	11816	17140.3	14201.7	15210.4	11877.7	11630.5	1	0.935957	0.945008	0.896599	0.768239	1.17528	0.973789	1.04295	0.81443	0.797486	0.175283	0.0378315	0.0979447	-0.0821686	0.0292471	0.258137	NO
Q96DG6	Carboxymethylenebutenolidase homolog	CMBL	923840	885830	847090	628220	752670	1043600	874020	821710	791030	766950	1.0401e+06	918975	789050	772409	754912	1	0.958857	0.916923	0.68001	0.814719	1.12584	0.994734	0.854099	0.836085	0.817146	0.125844	0.0358778	-0.0628243	0.156075	0.00242701	0.2574	NO
Q5TB80	Centrosomal protein of 162 kDa	CEP162	34496	29424	32059	23659	23309	36879	29245	33024	27827	25825	36755.3	30749.2	31711.4	27171.9	25419.7	1	0.852968	0.929354	0.685848	0.675702	1.0655	0.891385	0.919279	0.787684	0.736887	0.0654951	0.0384167	-0.0100756	0.101836	0.0611856	0.256858	NO
P27695	DNA-(apurinic or apyrimidinic site) lyase;DNA-(apurinic or apyrimidinic site) lyase, mitochondrial	APEX1	511530	461330	477760	357940	391490	576640	452080	478140	427240	411020	574706	475333	459136	417183	404569	1	0.901863	0.933982	0.699744	0.765331	1.1235	0.929237	0.897574	0.815558	0.790899	0.123504	0.0273744	-0.0364086	0.115814	0.0255679	0.255852	NO
Q08554	Desmocollin-1	DSC1	49359	24169	22994	21295	16539	33242	25414	36324	35725	17636	33130.5	26721.2	34880.3	34884	17359.2	1	0.489657	0.465852	0.431431	0.335076	0.671215	0.541364	0.706665	0.706741	0.351693	-0.328785	0.0517063	0.240813	0.27531	0.0166168	0.255661	NO
P29536	Leiomodin-1	LMOD1	10927	9647.2	10181	7371.3	7108.1	12335	9581.4	9673.2	8578.1	8121.2	12293.6	10074.2	9288.73	8376.17	7993.73	1	0.882877	0.931729	0.674595	0.650508	1.12507	0.921957	0.850071	0.766557	0.731558	0.125069	0.0390794	-0.0816573	0.0919619	0.0810499	0.255503	NO
Q96DT6	Cysteine protease ATG4C	ATG4C	77635	73095	71082	56509	49797	76697	75402	78979	59580	59107	76439.8	79280.3	75839.9	58177.5	58179.3	1	0.941521	0.915592	0.72788	0.641425	0.984605	1.02119	0.976878	0.749372	0.749395	-0.0153954	0.0796717	0.0612856	0.0214911	0.10797	0.255023	NO
Q13625	Apoptosis-stimulating of p53 protein 2	TP53BP2	264490	260770	241080	179220	214480	260400	269660	266610	223860	213140	259527	283530	256013	218590	209795	1	0.985935	0.91149	0.677606	0.810919	0.981234	1.07199	0.967951	0.826459	0.793204	-0.0187656	0.0860524	0.0564609	0.148853	-0.0177148	0.254886	NO
Q5W111	SPRY domain-containing protein 7	SPRYD7	9676.1	9335.3	10260	8201.2	7996	9515.6	8869.6	11638	8759.9	9545.4	9483.69	9325.81	11175.4	8553.69	9395.58	1	0.964779	1.06034	0.847573	0.826366	0.980115	0.963798	1.15495	0.884002	0.971009	-0.0198853	-0.000980843	0.0946081	0.0364287	0.144643	0.254813	NO
P28908	Tumor necrosis factor receptor superfamily member 8	TNFRSF8	23486	20310	25850	19599	18755	27641	20856	23182	21836	21253	27548.3	21928.7	22260.6	21322	20919.4	1	0.864771	1.10066	0.834497	0.798561	1.17297	0.933694	0.947825	0.907859	0.890719	0.172967	0.0689233	-0.152831	0.0733616	0.0921578	0.254579	NO
Q13948	Protein CASP	CUX1	18825	18128	16868	13581	12233	20069	18256	17331	15706	13453	20001.7	19195	16642.2	15336.3	13241.8	1	0.962975	0.896042	0.721434	0.649827	1.06251	1.01965	0.884046	0.814676	0.703418	0.062507	0.05668	-0.0119966	0.0932416	0.0535907	0.254023	NO
O95989	Diphosphoinositol polyphosphate phosphohydrolase 1	NUDT3	470340	441500	405910	308790	351930	468680	454850	403850	346760	432700	467108	478245	387799	338597	425908	1	0.938683	0.863014	0.656525	0.748246	0.993129	1.01681	0.824507	0.719899	0.905533	-0.00687124	0.0781249	-0.038507	0.0633735	0.157287	0.253407	NO
P15586	N-acetylglucosamine-6-sulfatase	GNS	403630	422120	366280	287630	331090	387400	437890	370450	317770	406800	386101	460413	355726	310290	400415	1	1.04581	0.907465	0.712608	0.820281	0.956571	1.14068	0.881317	0.768747	0.992035	-0.043429	0.0948714	-0.0261474	0.0561394	0.171754	0.253188	NO
P52566	Rho GDP-dissociation inhibitor 2	ARHGDIB	230170	195360	207740	150130	170720	251810	191000	215000	191230	169980	250966	200824	206455	186728	167312	1	0.848764	0.90255	0.652257	0.741713	1.09035	0.872503	0.896966	0.811263	0.726906	0.0903484	0.0237395	-0.00558441	0.159006	-0.0148063	0.252703	NO
Q9H4G0	Band 4.1-like protein 1	EPB41L1	102500	95573	94573	73405	70867	112990	93850	97585	79989	80864	112611	98677.2	93706.4	78106	79594.8	1	0.93242	0.922663	0.716146	0.691385	1.09864	0.962704	0.914209	0.76201	0.776534	0.0986445	0.0302848	-0.00845465	0.0458636	0.0851491	0.251487	NO
P11233	Ras-related protein Ral-A	RALA	209060	204980	175160	126820	115240	228070	206510	187250	138160	126550	227305	217132	179808	134908	124564	1	0.980484	0.837846	0.60662	0.551229	1.08727	1.03861	0.860076	0.645306	0.595828	0.0872722	0.0581263	0.0222309	0.0386858	0.0445982	0.250913	NO
O75347	Tubulin-specific chaperone A	TBCA	786450	653380	710640	544940	614070	851070	665940	731060	635640	645590	848216	700193	702003	620677	635457	1	0.830797	0.903605	0.692911	0.780813	1.07854	0.890321	0.892623	0.789213	0.808007	0.0785374	0.0595241	-0.0109818	0.096302	0.0271944	0.250576	NO
Q9Y5N6	Origin recognition complex subunit 6	ORC6	21807	19786	18596	13433	12517	22130	19466	21414	16998	12098	22055.8	20467.2	20562.9	16597.9	11908.1	1	0.907323	0.852754	0.615995	0.57399	1.01141	0.938563	0.942949	0.761125	0.546068	0.0114084	0.0312394	0.090195	0.14513	-0.0279216	0.250051	NO
P50579	Methionine aminopeptidase 2	METAP2	790180	738180	764520	598410	708700	879300	720910	747040	724730	749630	876351	757990	717348	707670	737864	1	0.934192	0.967526	0.757308	0.896884	1.10905	0.959263	0.907829	0.89558	0.933792	0.109052	0.0250704	-0.0596975	0.138272	0.0369081	0.249605	NO
Q6P4F2	Adrenodoxin-like protein, mitochondrial	FDX1L	58268	46750	53730	43338	43245	68440	46451	55506	48093	43209	68210.5	48840.2	53299.9	46960.9	42530.8	1	0.802327	0.922118	0.74377	0.742174	1.17063	0.8382	0.914736	0.805946	0.729917	0.170633	0.0358724	-0.00738201	0.0621759	-0.0122571	0.249043	NO
P49585	Choline-phosphate cytidylyltransferase A	PCYT1A	111150	95323	80632	62439	47334	122510	98289	87755	64463	52615	122099	103345	84267.1	62945.5	51789.2	1	0.857607	0.725434	0.561754	0.425857	1.09851	0.929775	0.758139	0.566311	0.465939	0.0985077	0.0721683	0.0327045	0.00455699	0.0400825	0.24802	NO
Q96S82	Ubiquitin-like protein 7	UBL7	135830	114800	122430	99330	82028	157590	117000	127090	102460	87251	157061	123018	122039	100048	85881.5	1	0.845174	0.901347	0.731282	0.603902	1.15631	0.905676	0.898466	0.736568	0.632272	0.156309	0.0605015	-0.00288083	0.00528633	0.0283703	0.247586	NO
Q9Y222	Cyclin-D-binding Myb-like transcription factor 1	DMTF1	15233	13516	13289	9108.9	7711.3	16871	13476	13426	10613	8495.9	16814.4	14169.1	12892.4	10363.2	8362.55	1	0.887284	0.872382	0.597972	0.506223	1.10382	0.930161	0.846345	0.68031	0.548976	0.103815	0.0428767	-0.0260374	0.0823387	0.0427526	0.245746	NO
Q9Y4P1	Cysteine protease ATG4B	ATG4B	163940	145040	147520	108470	96655	174410	142230	160830	125370	103110	173825	149546	154438	122419	101492	1	0.884714	0.899841	0.661645	0.589575	1.0603	0.912197	0.942038	0.746729	0.619078	0.0602969	0.0274834	0.0421964	0.0850844	0.0295023	0.244563	NO
P48739	Phosphatidylinositol transfer protein beta isoform	PITPNB	665680	600360	604430	475400	547990	728690	594960	608940	565770	576450	726246	625562	584737	552451	567402	1	0.901875	0.907989	0.714157	0.823203	1.09098	0.939734	0.878406	0.829906	0.852365	0.0909839	0.0378588	-0.0295831	0.115749	0.0291615	0.24417	NO
P25686	DnaJ homolog subfamily B member 2;DnaJ homolog subfamily B member 8	DNAJB2;DNAJB8	8130.4	7085.6	6402.5	4942.4	3758.7	9293.6	7024.4	7694.5	4961.3	3477.4	9262.43	7385.7	7388.68	4844.51	3422.82	1	0.871495	0.787477	0.607891	0.462302	1.13923	0.908406	0.908771	0.595851	0.42099	0.139234	0.036911	0.121295	-0.0120402	-0.0413117	0.244088	NO
Q8WU10	Pyridine nucleotide-disulfide oxidoreductase domain-containing protein 1	PYROXD1	55644	45750	50894	38236	34277	63851	47296	52877	41045	34675	63636.9	49728.7	50775.4	40078.8	34130.8	1	0.822191	0.914636	0.687154	0.616005	1.14364	0.893693	0.912504	0.720271	0.613377	0.143643	0.0715024	-0.00213218	0.0331173	-0.0026283	0.243502	NO
Q86SF2	N-acetylgalactosaminyltransferase 7	GALNT7	16163	12392	11658	9286.8	8516.6	19112	11958	11589	10056	9499.4	19047.9	12573.1	11128.4	9819.28	9350.3	1	0.766689	0.721277	0.574572	0.52692	1.17849	0.777892	0.68851	0.607516	0.5785	0.178488	0.0112022	-0.0327671	0.0329442	0.0515808	0.241448	NO
P99999	Cytochrome c	CYCS	224700	234570	209650	160710	175730	219980	248460	209940	174010	210900	219242	261240	201596	169914	207590	1	1.04393	0.933022	0.71522	0.782065	0.975711	1.16261	0.897177	0.75618	0.923853	-0.0242891	0.11869	-0.0358445	0.04096	0.141788	0.241304	NO
O60504	Vinexin	SORBS3	150000	148680	132700	125470	113910	178520	152180	136300	130760	112070	177921	160007	130883	127682	110311	1	0.9912	0.884667	0.836467	0.7594	1.18614	1.06672	0.872551	0.851212	0.735407	0.186142	0.075516	-0.0121158	0.0147456	-0.0239935	0.240294	NO
Q6JBY9	CapZ-interacting protein	RCSD1	621250	559160	555840	443400	475920	682960	542650	588240	508870	499370	680670	570561	564860	496891	491532	1	0.900056	0.894712	0.713722	0.766068	1.09565	0.918409	0.909231	0.799824	0.791198	0.0956451	0.0183522	0.0145189	0.0861021	0.02513	0.239748	NO
Q8WYN0	Cysteine protease ATG4A	ATG4A	25567	23305	22026	16508	12530	28236	22191	27624	18152	10503	28141.3	23332.4	26526.1	17724.7	10338.1	1	0.911527	0.861501	0.645676	0.490085	1.10069	0.912598	1.03751	0.693264	0.404355	0.100689	0.0010716	0.17601	0.0475884	-0.0857297	0.239629	NO
Q6NYC8	Phostensin	PPP1R18	210090	192450	193780	165970	156620	221280	189250	212080	187510	165570	220538	198984	203651	183096	162971	1	0.916036	0.922367	0.789995	0.74549	1.04973	0.947137	0.96935	0.871512	0.775721	0.0497305	0.0311014	0.0469832	0.0815171	0.0302311	0.239563	NO
Q92567	Protein FAM168A	FAM168A	32830	31053	30185	26496	30582	33633	32799	30583	29744	33062	33520.2	34486	29367.5	29043.8	32543.1	1	0.945873	0.919433	0.807067	0.931526	1.02102	1.05044	0.894531	0.884673	0.99126	0.0210236	0.10457	-0.0249025	0.0776062	0.059734	0.238031	NO
Q8NI22	Multiple coagulation factor deficiency protein 2	MCFD2	56852	43632	44916	25220	32524	56902	43065	46093	36502	35312	56711.2	45280.1	44261	35642.7	34757.8	1	0.767466	0.790051	0.443608	0.572082	0.997523	0.796455	0.77853	0.626939	0.611373	-0.00247719	0.0289885	-0.0115213	0.183331	0.0392907	0.237612	NO
P0CG22	Putative dehydrogenase/reductase SDR family member 4-like 1	DHRS4L1	23397	23439	21976	11588	9186.3	22849	22311	21933	17632	10806	22772.4	23458.6	21061.3	17216.9	10636.4	1	1.0018	0.939266	0.495277	0.392627	0.973303	1.00263	0.900169	0.735861	0.454605	-0.026697	0.000836422	-0.0390967	0.240584	0.0619777	0.237604	NO
Q8NHG7	Small VCP/p97-interacting protein	SVIP	8404.6	7108.7	7305	6406.6	5871.4	8884	7341.5	7531.4	6997.7	6555.9	8854.21	7719.11	7232.06	6832.97	6453	1	0.845811	0.869167	0.762273	0.698594	1.0535	0.918439	0.860488	0.813004	0.767794	0.0534952	0.0726282	-0.00867883	0.0507306	0.0692003	0.237375	NO
P01111	GTPase NRas	NRAS	32770	28573	30845	22773	23992	33639	28647	31592	26422	27375	33526.2	30120.5	30336.3	25800	26945.3	1	0.871926	0.941257	0.694934	0.732133	1.02308	0.919147	0.925735	0.787306	0.822256	0.0230755	0.0472219	-0.0155219	0.0923715	0.090123	0.23727	NO
O95997	Securin	PTTG1	47572	46465	47752	44231	40444	45174	49686	51733	44349	48233	45022.5	52241.6	49676.8	43305	47475.9	1	0.97673	1.00378	0.92977	0.850164	0.946408	1.09816	1.04425	0.910304	0.997981	-0.0535925	0.121429	0.0404613	-0.0194652	0.147817	0.236649	NO
Q96S94	Cyclin-L2	CCNL2	45996	39994	39873	29790	22476	50257	43013	44802	30051	21671	50088.5	45225.4	43021.3	29343.6	21330.9	1	0.86951	0.86688	0.647665	0.488651	1.08897	0.983246	0.935327	0.637959	0.463755	0.0889741	0.113736	0.0684474	-0.00970552	-0.0248966	0.236555	NO
O00299	Chloride intracellular channel protein 1	CLIC1	2043100	1750200	1829000	1360000	1588300	2248800	1684200	1845600	1696000	1637500	2.24126e+06	1.77083e+06	1.77225e+06	1.65608e+06	1.6118e+06	1	0.856639	0.895208	0.665655	0.777397	1.09699	0.866735	0.867429	0.81057	0.788898	0.096989	0.010096	-0.0277789	0.144915	0.0115013	0.235722	NO
Q8IXJ9	Putative Polycomb group protein ASXL1	ASXL1	55978	54972	48483	37738	38507	56957	53756	53662	41300	44397	56766	56520.9	51529.2	40327.8	43700.2	1	0.982029	0.866108	0.674158	0.687895	1.01408	1.0097	0.920525	0.720422	0.780667	0.0140766	0.0276707	0.054417	0.0462642	0.0927714	0.2352	NO
P61024	Cyclin-dependent kinases regulatory subunit 1	CKS1B	117050	98749	80960	50733	45462	112570	102750	104210	53686	48283	112192	108035	100068	52422.2	47525.2	1	0.843648	0.69167	0.43343	0.388398	0.9585	0.922981	0.854917	0.447862	0.406024	-0.0414996	0.0793333	0.163247	0.0144315	0.0176263	0.233139	NO
P36639	7,8-dihydro-8-oxoguanine triphosphatase	NUDT1	177760	169010	147970	117720	127630	177420	168470	158230	128400	152570	176825	177135	151941	125377	150175	1	0.950776	0.832414	0.662241	0.717991	0.99474	0.996486	0.854754	0.705318	0.844821	-0.00525999	0.0457093	0.0223392	0.0430772	0.12683	0.232696	NO
Q6ZRS2	Helicase SRCAP	SRCAP	68271	66074	48799	43709	36390	85599	60756	52316	45085	36163	85311.9	63881	50236.7	44023.7	35595.4	1	0.967819	0.714784	0.640228	0.533023	1.24961	0.935697	0.735842	0.644837	0.521384	0.249607	-0.0321221	0.0210581	0.00460924	-0.011639	0.231513	NO
Q9NXZ1	Sarcoma antigen 1	SAGE1	51402	48220	48338	44187	38440	55780	48994	52527	42598	44002	55592.9	51514	50439.3	41595.2	43311.4	1	0.938096	0.940391	0.859636	0.747831	1.08153	1.00218	0.981271	0.809214	0.842601	0.0815324	0.0640834	0.0408791	-0.0504217	0.0947698	0.230843	NO
Q03393	6-pyruvoyl tetrahydrobiopterin synthase	PTS	31298	26236	27431	20056	20753	31621	24769	29369	24948	23235	31515	26043	28201.7	24360.7	22870.3	1	0.838264	0.876446	0.640808	0.663078	1.00693	0.832098	0.90107	0.778347	0.730728	0.00693182	-0.00616661	0.0246247	0.13754	0.06765	0.230579	NO
Q5U5Q3	RNA-binding E3 ubiquitin-protein ligase MEX3C	MEX3C	5679.8	4994.7	4454.3	3918	3595.7	6714.1	5066.6	4557.6	4253.3	3455.8	6691.58	5327.2	4376.45	4153.18	3401.56	1	0.87938	0.784235	0.689813	0.633068	1.17814	0.937921	0.77053	0.731219	0.598887	0.178137	0.058541	-0.0137057	0.0414056	-0.034181	0.230197	NO
Q9BV68	E3 ubiquitin-protein ligase RNF126	RNF126	42829	37921	29939	16496	13604	45875	35749	32943	18641	17782	45721.1	37587.8	31633.7	18202.2	17502.9	1	0.885405	0.699036	0.38516	0.317635	1.06753	0.877624	0.738604	0.424997	0.408669	0.0675278	-0.00778082	0.0395679	0.0398371	0.0910341	0.230186	NO
Q13951	Core-binding factor subunit beta	CBFB	212730	186030	190380	148900	157690	231320	182210	191460	174590	170850	230544	191582	183850	170480	168168	1	0.874489	0.894937	0.699948	0.741268	1.08374	0.900588	0.864242	0.801392	0.790525	0.083741	0.0260988	-0.030695	0.101443	0.0492567	0.229845	NO
Q9Y259	Choline/ethanolamine kinase	CHKB	12872	11892	11854	10282	10366	13342	11866	13169	11377	10864	13297.3	12476.3	12645.6	11109.2	10693.5	1	0.923866	0.920914	0.798788	0.805314	1.03304	0.969261	0.98241	0.86305	0.830755	0.0330372	0.0453954	0.0614968	0.064262	0.0254414	0.229633	NO
Q5JTJ3	Cytochrome c oxidase assembly factor 6 homolog	COA6	120130	109180	109010	90873	103220	131380	116240	107920	99828	107390	130939	122219	103631	97478	105704	1	0.908849	0.907434	0.756456	0.859236	1.08998	1.01739	0.862654	0.811438	0.879917	0.0899808	0.108539	-0.0447796	0.0549821	0.0206812	0.229404	NO
O95400	CD2 antigen cytoplasmic tail-binding protein 2	CD2BP2	21517	19894	18494	12560	9178.9	22183	19782	20100	13603	11250	22108.6	20799.5	19301.1	13282.8	11073.4	1	0.924571	0.859506	0.583724	0.426588	1.02749	0.966654	0.897017	0.617316	0.514636	0.0274948	0.0420826	0.0375102	0.0335911	0.0880477	0.228726	NO
Q9Y5U2	Protein TSSC4	TSSC4	103940	97700	85553	82580	95578	108790	99485	94088	87892	101330	108425	104602	90348.4	85823	99739.6	1	0.939965	0.8231	0.794497	0.91955	1.04315	1.00637	0.869236	0.825697	0.959588	0.0431513	0.0664039	0.0461361	0.0312005	0.040038	0.22693	NO
Q9H7E9	UPF0488 protein C8orf33	C8orf33	64089	53178	50799	42638	36318	72660	50624	55921	44660	39198	72416.3	53227.9	53698.4	43608.7	38582.8	1	0.829752	0.792632	0.665294	0.566681	1.12993	0.83053	0.837872	0.680439	0.602018	0.129934	0.000777877	0.0452398	0.0151458	0.0353377	0.226435	NO
Q06413	Myocyte-specific enhancer factor 2C	MEF2C	34114	30087	27379	23695	21197	36982	30165	30997	24683	22101	36858	31716.5	29765	24102	21754.1	1	0.881955	0.802574	0.694583	0.621358	1.08044	0.929722	0.872516	0.706512	0.637689	0.0804354	0.0477675	0.0699419	0.0119291	0.0163308	0.226405	NO
O75940	Survival of motor neuron-related-splicing factor 30	SMNDC1	265970	235480	242270	183350	211790	299700	221520	232970	227810	224660	298695	232914	223710	222447	221134	1	0.885363	0.910892	0.689363	0.796293	1.12304	0.875715	0.841111	0.836362	0.831424	0.12304	-0.00964802	-0.0697808	0.146999	0.035131	0.225741	NO
P12829	Myosin light chain 4	MYL4	370980	315110	281820	204800	204890	384410	316780	315220	232460	218850	383121	333074	302691	226988	215415	1	0.849399	0.759664	0.552051	0.552294	1.03273	0.897821	0.815924	0.61186	0.580665	0.0327263	0.0484221	0.0562599	0.0598086	0.0283708	0.225588	NO
Q9UNZ5	Leydig cell tumor 10 kDa protein homolog	C19orf53	52718	47297	48674	42544	42832	56836	46061	51057	47924	45754	56645.4	48430.2	49027.7	46795.8	45035.9	1	0.89717	0.92329	0.807011	0.812474	1.0745	0.918664	0.929999	0.887664	0.854279	0.0744981	0.0214946	0.00670918	0.0806526	0.0418047	0.225159	NO
Q5M775	Cytospin-B	SPECC1	341000	301430	284640	234010	204810	327130	316730	320680	250750	234470	326033	333021	307934	244847	230790	1	0.883959	0.834721	0.686246	0.600616	0.956108	0.976601	0.903033	0.718027	0.676803	-0.0438918	0.0926424	0.0683117	0.0317807	0.0761872	0.22503	NO
Q15047	Histone-lysine N-methyltransferase SETDB1	SETDB1	253160	206270	215580	216520	194420	339470	182530	209840	267520	152330	338332	191918	201500	261222	149939	1	0.814781	0.851556	0.855269	0.767973	1.33643	0.758092	0.795938	1.03185	0.59227	0.336434	-0.0566896	-0.0556181	0.176578	-0.175703	0.225001	NO
Q7L266	Isoaspartyl peptidase/L-asparaginase;Isoaspartyl peptidase/L-asparaginase alpha chain;Isoaspartyl peptidase/L-asparaginase beta chain	ASRGL1	91407	89263	85425	63652	74931	96073	87495	89376	77019	77624	95750.8	91995.3	85823.7	75205.9	76405.6	1	0.976544	0.934556	0.696358	0.819751	1.04752	1.00644	0.938918	0.822759	0.835884	0.0475215	0.0298918	0.00436151	0.126401	0.0161326	0.224308	NO
Q9Y6U3	Adseverin	SCIN	19619	18806	17626	13712	13802	20713	18977	18879	15107	14715	20643.5	19953.1	18128.6	14751.4	14484	1	0.958561	0.898415	0.698914	0.703502	1.05222	1.01703	0.924035	0.751892	0.738266	0.0522215	0.0584681	0.0256199	0.0529779	0.0347641	0.224052	NO
P53985	Monocarboxylate transporter 1	SLC16A1	34045	29850	29623	23691	25947	31417	31232	34725	26690	27660	31311.6	32838.4	33344.8	26061.7	27225.9	1	0.876781	0.870113	0.695873	0.762138	0.919713	0.964559	0.979434	0.765508	0.799702	-0.0802868	0.0877786	0.109321	0.0696344	0.0375637	0.224011	NO
P36551	Oxygen-dependent coproporphyrinogen-III oxidase, mitochondrial	CPOX	851520	725450	698070	531750	502930	878900	703850	756250	622300	559230	875952	740053	726192	607651	550452	1	0.851947	0.819793	0.624472	0.590626	1.02869	0.869096	0.852819	0.713607	0.646435	0.0286927	0.0171489	0.0330259	0.0891356	0.055809	0.223812	NO
P62330	ADP-ribosylation factor 6	ARF6	48917	40222	37810	21275	19709	47049	41501	41414	26312	23249	46891.2	43635.6	39768	25692.6	22884.1	1	0.82225	0.772942	0.43492	0.402907	0.958587	0.892034	0.812968	0.525229	0.467815	-0.0414128	0.0697837	0.0400263	0.0903081	0.0649077	0.223613	NO
Q8NBJ7	Sulfatase-modifying factor 2	SUMF2	196940	209360	189820	154700	150800	196370	211240	193710	165690	182800	195711	222105	186011	161790	179931	1	1.06306	0.963847	0.785518	0.765715	0.993762	1.12778	0.944505	0.821517	0.913633	-0.00623829	0.064716	-0.0193418	0.0359987	0.147917	0.223052	NO
P04406	Glyceraldehyde-3-phosphate dehydrogenase	GAPDH	4834800	4498600	4369200	3507400	3947700	5252500	4328500	4411400	4040700	4334500	5.23488e+06	4.55114e+06	4.23607e+06	3.94558e+06	4.26647e+06	1	0.930462	0.903698	0.725449	0.816518	1.08275	0.941329	0.876161	0.816079	0.88245	0.082751	0.0108664	-0.0275368	0.0906304	0.0659318	0.222643	NO
P35712	Transcription factor SOX-6	SOX6	32246	27215	27831	24967	21892	36828	25834	30104	24843	24672	36704.5	27162.8	28907.5	24258.2	24284.8	1	0.843981	0.863084	0.774267	0.678906	1.13826	0.842361	0.896467	0.752285	0.753109	0.138265	-0.00161955	0.0333837	-0.0219815	0.0742032	0.222251	NO
P47224	Guanine nucleotide exchange factor MSS4	RABIF	8080	8258.4	6418.9	6419.8	5192.6	9307.5	8215.6	6961	6896.6	4907.4	9276.29	8638.17	6684.33	6734.25	4830.37	1	1.02208	0.794418	0.79453	0.642649	1.14806	1.06908	0.827268	0.833447	0.597819	0.148055	0.0470013	0.0328501	0.0389172	-0.0448298	0.221994	NO
P16083	Ribosyldihydronicotinamide dehydrogenase [quinone]	NQO2	729160	632830	631990	458970	526100	750810	626050	643080	550370	588600	748292	658251	617520	537414	579362	1	0.867889	0.866737	0.62945	0.721515	1.02624	0.902752	0.846893	0.737032	0.79456	0.0262384	0.0348634	-0.0198445	0.107581	0.073045	0.221884	NO
Q16656	Nuclear respiratory factor 1	NRF1	73400	56276	55524	38927	28642	87332	52173	59325	44971	26678	87039.1	54856.5	56967.1	43912.4	26259.3	1	0.766703	0.756458	0.530341	0.390218	1.18582	0.747364	0.776118	0.598261	0.357756	0.185819	-0.0193389	0.0196604	0.0679204	-0.0324623	0.221599	NO
O95777	U6 snRNA-associated Sm-like protein LSm8	LSM8	100260	104740	92241	71141	72124	94849	108060	97455	77544	86626	94530.9	113618	93581.6	75718.6	85266.3	1	1.04468	0.920018	0.709565	0.71937	0.942858	1.13323	0.933389	0.755222	0.850452	-0.0571424	0.0885506	0.0133709	0.0456571	0.131083	0.221519	NO
Q9NVM6	DnaJ homolog subfamily C member 17	DNAJC17	227240	208870	204520	171620	165390	268590	203970	209220	183610	168220	267689	214461	200904	179288	165580	1	0.91916	0.900018	0.755237	0.727821	1.178	0.943765	0.884107	0.78898	0.728655	0.178002	0.024605	-0.0159111	0.0337429	0.000834653	0.221274	NO
Q96KC8	DnaJ homolog subfamily C member 1	DNAJC1	155190	139140	143270	116290	118080	162460	135200	154350	130280	128820	161915	142154	148215	127213	126798	1	0.896578	0.923191	0.74934	0.760874	1.04333	0.916	0.955057	0.819725	0.817051	0.043335	0.0194216	0.0318656	0.0703856	0.0561768	0.221185	NO
Q712K3	Ubiquitin-conjugating enzyme E2 R2	UBE2R2	289740	279820	260440	207500	243050	312860	276710	250110	248970	262570	311811	290943	240169	243109	258449	1	0.965762	0.898875	0.716159	0.838856	1.07617	1.00415	0.828913	0.83906	0.892002	0.0761744	0.0383883	-0.0699622	0.1229	0.0531469	0.220648	NO
Q96AT1	Uncharacterized protein KIAA1143	KIAA1143	340160	297940	309750	246940	245460	351350	302520	327120	276060	267520	350172	318080	314118	269561	263321	1	0.875882	0.910601	0.725952	0.721602	1.02943	0.93509	0.923443	0.792455	0.774109	0.0294322	0.0592079	0.012842	0.0665023	0.0525079	0.220492	NO
Q6ZV73	FYVE, RhoGEF and PH domain-containing protein 6	FGD6	21718	24147	16443	16654	13780	28745	22337	17933	15996	12733	28648.6	23485.9	17220.2	15619.4	12533.1	1	1.11184	0.757114	0.766829	0.634497	1.31912	1.0814	0.792902	0.719194	0.577086	0.319118	-0.0304399	0.0357877	-0.0476358	-0.0574111	0.219419	NO
Q5JS54	Proteasome assembly chaperone 4	PSMG4	86405	72103	79636	58152	55560	86126	70441	91915	67589	57547	85837.2	74064.1	88261.8	65997.9	56643.8	1	0.834477	0.92166	0.673017	0.643018	0.993428	0.857174	1.02149	0.763821	0.655561	-0.00657187	0.0226971	0.0998294	0.090804	0.0125428	0.219301	NO
Q9Y5J7	Mitochondrial import inner membrane translocase subunit Tim9	TIMM9	12428	11298	11453	8910.7	7515.5	12866	11574	11816	9463.3	8878.4	12822.9	12169.3	11346.4	9240.53	8739.05	1	0.909076	0.921548	0.716986	0.604723	1.03177	0.979185	0.912968	0.743525	0.703174	0.0317711	0.0701087	-0.00858041	0.0265392	0.0984508	0.218289	NO
P68036	Ubiquitin-conjugating enzyme E2 L3	UBE2L3	488220	445080	457110	389280	442420	581620	459280	433350	421170	445670	579669	482903	416126	411255	438675	1	0.911638	0.936279	0.797345	0.90619	1.18731	0.98911	0.852333	0.842357	0.898519	0.187312	0.0774715	-0.0839455	0.0450114	-0.00767095	0.218178	NO
Q6N069	N-alpha-acetyltransferase 16, NatA auxiliary subunit	NAA16	120840	110900	62178	40861	54244	121970	101430	81496	53422	57546	121561	106647	78256.9	52164.4	56642.8	1	0.917742	0.514548	0.338141	0.448891	1.00597	0.882548	0.647607	0.431682	0.468742	0.00596613	-0.0351947	0.133059	0.0935404	0.0198508	0.217222	NO
Q9UQR0	Sex comb on midleg-like protein 2	SCML2	126440	120340	114040	101460	85721	132560	122110	128660	100530	94733	132115	128391	123546	98163.5	93246.1	1	0.951756	0.90193	0.802436	0.677958	1.04489	1.01543	0.977114	0.776364	0.737473	0.0448864	0.0636725	0.0751842	-0.0260719	0.0595152	0.217186	NO
P23381	Tryptophan--tRNA ligase, cytoplasmic;T1-TrpRS;T2-TrpRS	WARS	1754900	1638900	1593300	1202300	1434100	1830300	1623100	1556500	1464100	1573900	1.82416e+06	1.70658e+06	1.49464e+06	1.42963e+06	1.5492e+06	1	0.933899	0.907915	0.68511	0.817198	1.03947	0.972468	0.851693	0.814653	0.882783	0.0394676	0.0385688	-0.0562223	0.129543	0.0655858	0.216943	NO
Q16890	Tumor protein D53	TPD52L1	192120	190310	176330	146860	155790	193250	180810	191040	171070	172470	192602	190110	183447	167043	169763	1	0.990579	0.917812	0.764418	0.810899	1.00251	0.989538	0.954856	0.869472	0.88363	0.0025083	-0.00104106	0.0370443	0.105054	0.0727304	0.216296	NO
Q9HB71	Calcyclin-binding protein	CACYBP	1830100	1616600	1671900	1308100	1500400	2080700	1568200	1630600	1548700	1546300	2.07372e+06	1.64886e+06	1.56579e+06	1.51224e+06	1.52203e+06	1	0.88334	0.913557	0.71477	0.819846	1.13312	0.900967	0.855576	0.826317	0.831665	0.133119	0.0176278	-0.0579802	0.111547	0.0118189	0.216133	NO
Q9UGM3	Deleted in malignant brain tumors 1 protein	DMBT1	8553.6	8035.6	8702.5	7849.8	6894.4	9578.1	8214.7	10176	7674.7	6533.3	9545.98	8637.22	9771.55	7494.03	6430.76	1	0.939441	1.01741	0.917719	0.806023	1.11602	1.00978	1.14239	0.876126	0.751819	0.116019	0.0703358	0.124982	-0.0415926	-0.0542046	0.215539	NO
P22670	MHC class II regulatory factor RFX1	RFX1	31266	28380	26851	33788	21512	36789	29560	32858	25719	24501	36665.6	31080.4	31552	25113.6	24116.4	1	0.907695	0.858792	1.08066	0.688032	1.1727	0.994065	1.00915	0.803223	0.771331	0.172699	0.0863693	0.150356	-0.27744	0.0832994	0.215284	NO
Q9UK61	Protein FAM208A	FAM208A	67927	68500	62205	54311	47558	70085	68847	73971	57053	46880	69850	72388.2	71031	55709.9	46144.2	1	1.00844	0.915763	0.79955	0.700134	1.02831	1.06568	1.0457	0.820144	0.67932	0.0283091	0.0572402	0.129933	0.0205948	-0.0208137	0.215263	NO
Q9NUQ9	Protein FAM49B	FAM49B	584790	503880	502650	357480	339130	590610	496840	545850	431430	362740	588629	522395	524155	421274	357047	1	0.861643	0.859539	0.611296	0.579918	1.00657	0.893304	0.896313	0.720385	0.610555	0.0065652	0.031661	0.0367734	0.109089	0.0306376	0.214726	NO
O75414	Nucleoside diphosphate kinase 6	NME6	11028	9453.1	8890.2	7058.8	5893.3	12114	9503.1	9643.4	7881.8	5756	12073.4	9991.89	9260.11	7696.26	5665.66	1	0.857191	0.806148	0.64008	0.534394	1.09479	0.906048	0.839691	0.697883	0.513752	0.0947926	0.0488569	0.0335432	0.0578036	-0.0206424	0.214354	NO
Q99574	Neuroserpin	SERPINI1	37610	35331	33832	32749	30767	42940	33187	37578	32834	33032	42796	34894	36084.4	32061.1	32513.5	1	0.939404	0.899548	0.870752	0.818054	1.13789	0.927785	0.959437	0.852461	0.864492	0.137889	-0.0116198	0.0598891	-0.0182911	0.0464382	0.214305	NO
Q13586	Stromal interaction molecule 1	STIM1	183040	172900	167730	136080	143650	178740	185550	176070	146420	159820	178141	195094	169072	142973	157312	1	0.944602	0.916357	0.743444	0.784801	0.973233	1.06585	0.923689	0.781104	0.859438	-0.0267671	0.121251	0.00733142	0.0376595	0.0746367	0.214112	NO
P30041	Peroxiredoxin-6	PRDX6	2114100	1775700	1876200	1388000	1507900	2334600	1698400	1876300	1612000	1652100	2.32677e+06	1.78576e+06	1.80172e+06	1.57405e+06	1.62617e+06	1	0.839932	0.88747	0.656544	0.713259	1.1006	0.844689	0.852242	0.74455	0.769202	0.100596	0.00475733	-0.0352278	0.0880056	0.055943	0.214074	NO
Q9BUH6	Protein PAXX	C9orf142	274670	259230	258030	218780	188550	266450	251330	320060	214330	214940	265556	264257	307339	209285	211566	1	0.943787	0.939418	0.796519	0.68646	0.96682	0.96209	1.11894	0.761949	0.770257	-0.0331802	0.0183027	0.179521	-0.0345703	0.0837964	0.213869	NO
P51858	Hepatoma-derived growth factor	HDGF	1869700	1593800	1697300	1332400	1449700	2009400	1572100	1794900	1516900	1505900	2.00266e+06	1.65296e+06	1.72356e+06	1.48119e+06	1.48226e+06	1	0.852436	0.907793	0.712628	0.775365	1.07111	0.884078	0.921838	0.792208	0.792782	0.0711136	0.0316421	0.0140451	0.0795804	0.0174166	0.213798	NO
O43818	U3 small nucleolar RNA-interacting protein 2	RRP9	170980	146810	149960	125320	116080	175040	154510	157480	133750	128970	174453	162457	151221	130601	126946	1	0.858638	0.877062	0.732951	0.67891	1.02031	0.950154	0.884436	0.763841	0.742459	0.0203121	0.0915151	0.00737407	0.0308893	0.0635497	0.21364	NO
P51808	Dynein light chain Tctex-type 3	DYNLT3	39173	31391	32690	23166	19709	44550	30341	34405	25495	20579	44400.6	31901.6	33037.5	24894.8	20256	1	0.801343	0.834503	0.591377	0.503127	1.13345	0.814377	0.843375	0.63551	0.517091	0.133449	0.0130343	0.00887201	0.0441333	0.0139636	0.213452	NO
O60613	15 kDa selenoprotein	44454	98954	88399	87824	70301	64176	113510	86386	91287	76120	65853	113129	90829.3	87658.7	74328.1	64819.4	1	0.893334	0.887523	0.710441	0.648544	1.14325	0.917894	0.885853	0.751138	0.655046	0.143252	0.0245597	-0.00167029	0.0406967	0.00650191	0.21334	NO
Q86WQ0	Nuclear receptor 2C2-associated protein	NR2C2AP	170890	144740	144580	102690	88020	204000	129870	142920	119400	94996	203316	136550	137240	116589	93505	1	0.846978	0.846041	0.600913	0.515068	1.18975	0.799051	0.803087	0.682247	0.547165	0.189747	-0.0479262	-0.0429544	0.0813346	0.0320965	0.212297	NO
O95405	Zinc finger FYVE domain-containing protein 9	ZFYVE9	24011	22079	20404	17036	17483	24452	20510	22587	19250	20002	24370	21564.9	21689.3	18796.8	19688.1	1	0.919537	0.849777	0.709508	0.728125	1.01495	0.898127	0.903305	0.782843	0.81996	0.0149513	-0.0214096	0.053528	0.073335	0.0918352	0.21224	NO
Q6XZF7	Dynamin-binding protein	DNMBP	147760	79961	125520	140930	99961	242550	60735	109560	164630	54752	241737	63858.9	105205	160755	53892.6	1	0.541155	0.849486	0.953776	0.676509	1.63601	0.43218	0.712002	1.08794	0.364731	0.636008	-0.108975	-0.137483	0.134167	-0.311778	0.211939	NO
Q01167	Forkhead box protein K2	FOXK2	31497	28787	26441	20683	20290	34430	26900	27423	23889	22464	34314.5	28283.6	26333	23326.6	22111.4	1	0.91396	0.839477	0.656666	0.644188	1.08945	0.897978	0.836049	0.740599	0.702016	0.089454	-0.0159823	-0.00342735	0.0839331	0.0578281	0.211806	NO
Q9NXF7	DDB1- and CUL4-associated factor 16	DCAF16	43250	40958	23185	25303	19036	59958	34580	23255	23127	20163	59756.9	36358.6	22330.7	22582.6	19846.5	1	0.947006	0.536069	0.58504	0.440139	1.38166	0.840662	0.516317	0.522141	0.458879	0.381663	-0.106344	-0.0197524	-0.0628999	0.0187405	0.211407	NO
O14745	Na(+)/H(+) exchange regulatory cofactor NHE-RF1	SLC9A3R1	544190	492400	492980	392560	469430	598820	501950	466930	463230	488900	596812	527768	448371	452325	481226	1	0.904831	0.905897	0.721366	0.862622	1.0967	0.969823	0.823924	0.83119	0.884298	0.0966973	0.0649918	-0.0819724	0.109824	0.0216769	0.211218	NO
Q16740	ATP-dependent Clp protease proteolytic subunit, mitochondrial	CLPP	235590	214770	209170	162000	178230	237840	210880	221500	190690	194910	237042	221727	212696	186201	191851	1	0.911626	0.887856	0.687635	0.756526	1.00616	0.941155	0.902824	0.790361	0.814342	0.00616475	0.0295286	0.0149679	0.102725	0.0578155	0.211202	NO
P49006	MARCKS-related protein	MARCKSL1	211690	187620	197420	158200	158920	216400	182070	202330	181300	182950	215674	191435	194288	177032	180078	1	0.886296	0.93259	0.747319	0.75072	1.01882	0.904317	0.917796	0.83628	0.850671	0.0188212	0.0180207	-0.0147942	0.0889608	0.0999503	0.210959	NO
Q9BRA0	N-alpha-acetyltransferase 38, NatC auxiliary subunit	NAA38	43628	40289	38588	29097	28143	44892	39588	39485	32920	33031	44741.4	41624.2	37915.6	32145	32512.6	1	0.923467	0.884478	0.666934	0.645067	1.02552	0.954071	0.869067	0.736799	0.745222	0.0255213	0.0306045	-0.0154113	0.0698645	0.100155	0.210734	NO
Q14135	Transcription cofactor vestigial-like protein 4	VGLL4	17400	16109	16291	14327	13546	18028	16276	16912	15553	15063	17967.5	17113.2	16239.8	15186.9	14826.6	1	0.925805	0.936264	0.823391	0.778506	1.03262	0.983515	0.933323	0.872809	0.852102	0.0326172	0.0577103	-0.00294151	0.0494181	0.0735963	0.2104	NO
P29692	Elongation factor 1-delta	EEF1D	1269300	1086300	1100200	800080	701320	1326500	1032400	1274100	913340	711190	1.32205e+06	1.0855e+06	1.22346e+06	891840	700027	1	0.855826	0.866777	0.630332	0.552525	1.04156	0.855197	0.963885	0.702623	0.551507	0.0415594	-0.000628964	0.0971085	0.0722914	-0.00101839	0.209312	NO
O95104	Splicing factor, arginine/serine-rich 15	SCAF4	236000	228330	233480	187430	200310	232250	231540	248800	205810	223610	231471	243449	238911	200965	220100	1	0.9675	0.989322	0.794195	0.848771	0.98081	1.03156	1.01234	0.851547	0.932628	-0.0191903	0.0640648	0.0230137	0.0573523	0.0838571	0.209098	NO
P02654	Apolipoprotein C-I;Truncated apolipoprotein C-I	APOC1	83291	75522	59689	47579	37333	91919	72367	69190	49705	38752	91610.7	76089.2	66440	48534.9	38143.8	1	0.906725	0.716632	0.571238	0.448224	1.09989	0.913535	0.797685	0.582715	0.457958	0.0998875	0.00680996	0.081053	0.0114769	0.00973406	0.208961	NO
Q14691	DNA replication complex GINS protein PSF1	GINS1	304540	275350	275070	228480	233990	320720	279220	279660	254190	255080	319644	293582	268545	248206	251076	1	0.904151	0.903231	0.750246	0.768339	1.0496	0.964017	0.881804	0.81502	0.824445	0.0495974	0.0598664	-0.0214268	0.0647739	0.0561054	0.208916	NO
Q9Y3C8	Ubiquitin-fold modifier-conjugating enzyme 1	UFC1	272670	267780	245830	199540	253360	283290	270340	237190	236790	274860	282340	284245	227763	231216	270546	1	0.982066	0.901566	0.7318	0.929182	1.03546	1.04245	0.835305	0.84797	0.99221	0.0354638	0.0603843	-0.0662608	0.116169	0.0630281	0.208785	NO
O43709	Probable 18S rRNA (guanine-N(7))-methyltransferase	WBSCR22	57623	53139	46383	37147	33099	54317	55947	56458	38220	35461	54134.8	58824.6	54214	37320.3	34904.4	1	0.922184	0.804939	0.644656	0.574406	0.939466	1.02085	0.94084	0.647663	0.605738	-0.0605342	0.0986697	0.135901	0.00300718	0.0313315	0.208375	NO
Q53FT3	Protein Hikeshi	C11orf73	196010	174340	181670	142060	145140	205550	176300	181280	168430	153690	204861	185368	174075	164465	151278	1	0.889444	0.92684	0.724759	0.740472	1.04515	0.945707	0.888092	0.839065	0.771786	0.045154	0.0562625	-0.0387487	0.114306	0.0313133	0.208287	NO
Q01459	Di-N-acetylchitobiase	CTBS	262390	251290	246030	197830	217460	271110	241180	247470	240190	237380	270201	253585	237634	234536	233654	1	0.957697	0.93765	0.753954	0.828766	1.02977	0.966444	0.905652	0.893844	0.890484	0.0297678	0.00874702	-0.0319978	0.13989	0.0617179	0.208125	NO
Q86UY8	5-nucleotidase domain-containing protein 3	NT5DC3	96845	88617	85017	75746	61628	99133	84785	99356	78773	68810	98800.5	89145.9	95407	76918.6	67730	1	0.915039	0.877867	0.782136	0.636357	1.02019	0.920501	0.985152	0.794245	0.699365	0.0201924	0.00546161	0.107285	0.0121085	0.0630077	0.208055	NO
P47755	F-actin-capping protein subunit alpha-2	CAPZA2	270940	224160	233990	178520	185370	290760	223380	240920	204270	196960	289785	234870	231344	199461	193869	1	0.827342	0.863623	0.658891	0.684174	1.06955	0.866869	0.853859	0.736183	0.715541	0.0695537	0.0395275	-0.00976444	0.0772916	0.031367	0.207975	NO
Q92614	Unconventional myosin-XVIIIa	MYO18A	581530	502200	355200	207670	179300	613070	480120	460680	224360	171940	611014	504815	442370	219078	169241	1	0.863584	0.610803	0.35711	0.308325	1.0507	0.868081	0.7607	0.376728	0.291028	0.0507006	0.00449684	0.149897	0.019618	-0.017297	0.207416	NO
O43422	52 kDa repressor of the inhibitor of the protein kinase	PRKRIR	9064.6	9532	6614.5	5611.1	3697.5	10868	7824.7	8745.7	5135.6	3988.4	10831.6	8227.16	8398.09	5014.71	3925.8	1	1.05156	0.729707	0.619012	0.407905	1.19493	0.907615	0.926472	0.553219	0.433091	0.194929	-0.143948	0.196765	-0.0657938	0.0251858	0.207137	NO
Q8N5C8	TGF-beta-activated kinase 1 and MAP3K7-binding protein 3	TAB3	6898.3	7927.4	6601.4	4972.4	5102.7	7978.6	7448.9	7193.4	5755.6	4689.4	7951.84	7832.04	6907.49	5620.11	4615.8	1	1.14918	0.95696	0.720815	0.739704	1.15272	1.13536	1.00133	0.814709	0.669121	0.152725	-0.0138244	0.0443721	0.0938942	-0.0705831	0.206584	NO
Q9BZL4	Protein phosphatase 1 regulatory subunit 12C	PPP1R12C	123340	114520	108430	98363	81831	136070	121010	116990	95626	84687	135614	127234	112340	93374.9	83357.8	1	0.92849	0.879115	0.797495	0.663459	1.09951	1.03157	0.910817	0.757053	0.675837	0.0995108	0.103082	0.031702	-0.0404417	0.0123786	0.206232	NO
Q4ADV7	RAB6A-GEF complex partner protein 1	RIC1	30930	26875	22336	20262	13675	40004	25115	24438	18498	12852	39869.8	26406.8	23466.7	18062.5	12650.3	1	0.868898	0.722147	0.655092	0.442127	1.28903	0.85376	0.758703	0.583982	0.408997	0.289035	-0.0151376	0.0365564	-0.0711106	-0.0331303	0.206212	NO
Q8WUX2	Putative glutathione-specific gamma-glutamylcyclotransferase 2	CHAC2	146700	128200	136360	114650	113340	159630	126910	137610	124480	125130	159095	133438	132141	121550	123166	1	0.873892	0.929516	0.781527	0.772597	1.08449	0.909595	0.900754	0.82856	0.839577	0.0844898	0.035703	-0.0287623	0.0470326	0.0669802	0.205443	NO
Q53RE8	Ankyrin repeat domain-containing protein 39	ANKRD39	5991.3	5647.5	3670.8	4105.9	3324.1	7046.8	4912.9	5180.4	3647.7	3294.1	7023.17	5165.6	4974.5	3561.83	3242.4	1	0.942617	0.612688	0.68531	0.554821	1.17223	0.862183	0.830287	0.594501	0.541184	0.172228	-0.080434	0.217599	-0.0908098	-0.013637	0.204946	NO
Q9H8V3	Protein ECT2	ECT2	17350	16504	15101	11225	9650.2	18669	15479	16056	12562	10991	18606.4	16275.2	15417.8	12266.3	10818.5	1	0.951239	0.870375	0.646974	0.556207	1.07241	0.93805	0.888636	0.70699	0.623544	0.0724144	-0.0131893	0.0182617	0.0600164	0.0673365	0.20484	NO
Q9UK76	Hematological and neurological expressed 1 protein;Hematological and neurological expressed 1 protein, N-terminally processed	HN1	383180	342610	361590	301090	335200	430990	342460	351380	339130	349370	429545	360074	337414	331147	343886	1	0.894123	0.943656	0.785766	0.874785	1.121	0.939701	0.880563	0.864207	0.897454	0.120999	0.0455778	-0.0630928	0.0784402	0.0226692	0.204594	NO
Q9ULI1	NACHT and WD repeat domain-containing protein 2	NWD2	51959	46188	44143	36242	34292	50565	49017	51708	39465	33849	50395.4	51538.2	49652.8	38536	33317.7	1	0.888932	0.849574	0.697511	0.659982	0.969907	0.991901	0.955615	0.741661	0.641231	-0.0300926	0.10297	0.106042	0.0441497	-0.018751	0.204317	NO
Q9ULH0	Kinase D-interacting substrate of 220 kDa	KIDINS220	173820	146880	152110	122670	111560	180630	145090	165170	133380	123040	180024	152553	158605	130240	121109	1	0.845012	0.875101	0.70573	0.641813	1.03569	0.877648	0.912468	0.749282	0.696748	0.0356934	0.0326356	0.0373672	0.0435518	0.054935	0.204183	NO
O95243	Methyl-CpG-binding domain protein 4	MBD4	12882	10384	8228.5	6845.4	4997	12444	9883.8	8488.5	9209.6	6119.2	12402.3	10392.2	8151.12	8992.8	6023.15	1	0.806086	0.63876	0.531393	0.387906	0.962759	0.806721	0.632752	0.69809	0.467564	-0.0372406	0.000634591	-0.00600706	0.166698	0.079658	0.203743	NO
Q562F6	Shugoshin-like 2	SGOL2	31246	28281	25260	18843	17508	30782	26439	26584	23995	20373	30678.8	27798.9	25527.4	23430.1	20053.2	1	0.905108	0.808423	0.603053	0.560328	0.981846	0.889678	0.816981	0.749861	0.641786	-0.0181538	-0.0154294	0.00855775	0.146807	0.0814578	0.20324	NO
O75030	Microphthalmia-associated transcription factor	MITF	102090	97639	84924	71776	79501	106130	95096	91760	82476	83539	105774	99987.3	88112.9	80534.5	82227.8	1	0.956401	0.831854	0.703066	0.778734	1.03609	0.979403	0.863091	0.788858	0.805444	0.0360865	0.023002	0.0312363	0.0857917	0.0267097	0.202826	NO
Q9BSD7	Cancer-related nucleoside-triphosphatase	NTPCR	190750	184920	183750	147690	142210	195000	185850	195060	161080	156030	194346	195409	187307	157288	153581	1	0.969436	0.963303	0.77426	0.745531	1.01885	1.02443	0.981951	0.824577	0.805143	0.018852	0.0549894	0.0186483	0.0503177	0.059612	0.202419	NO
Q9NP97	Dynein light chain roadblock-type 1;Dynein light chain roadblock-type 2	DYNLRB1;DYNLRB2	79611	81558	77923	63334	71909	76754	83677	91281	73387	67718	76496.6	87980.9	87653	71659.4	66655.1	1	1.02446	0.978797	0.795543	0.903255	0.96088	1.10514	1.10102	0.90012	0.83726	-0.0391204	0.080679	0.122219	0.104576	-0.0659944	0.202359	NO
P18669	Phosphoglycerate mutase 1	PGAM1	1974700	1794100	1809300	1419900	1510200	2063800	1757400	1858700	1652200	1629400	2.05688e+06	1.84779e+06	1.78482e+06	1.61331e+06	1.60383e+06	1	0.908543	0.91624	0.719046	0.764774	1.04162	0.935733	0.903846	0.816988	0.812187	0.0416157	0.02719	-0.0123946	0.0979422	0.0474125	0.201766	NO
Q6UX04	Peptidyl-prolyl cis-trans isomerase CWC27 homolog	CWC27	400120	375900	307680	202080	188760	416610	367910	358900	246140	170900	415213	386834	344635	240346	168218	1	0.939468	0.768969	0.505048	0.471758	1.03772	0.966794	0.86133	0.600684	0.420418	0.0377207	0.0273256	0.0923603	0.0956357	-0.0513406	0.201702	NO
Q86SZ2	Trafficking protein particle complex subunit 6B	TRAPPC6B	201250	169040	147130	117350	111400	208400	156470	151630	158180	116280	207701	164518	145603	154456	114455	1	0.83995	0.731081	0.583106	0.55354	1.03206	0.817481	0.723495	0.767485	0.56872	0.0320551	-0.0224693	-0.00758593	0.184379	0.0151796	0.201559	NO
Q15056	Eukaryotic translation initiation factor 4H	EIF4H	494510	465640	453560	350380	380360	559780	472490	444110	395250	383020	557903	496793	426458	385946	377008	1	0.941619	0.917191	0.70854	0.769165	1.12819	1.00462	0.862386	0.780461	0.762387	0.128193	0.0629969	-0.0548048	0.0719209	-0.00677797	0.201528	NO
Q8WWZ3	Ectodysplasin-A receptor-associated adapter protein	EDARADD	29591	30054	28250	23819	23813	30326	29884	30321	26990	24763	30224.3	31421.1	29115.9	26354.6	24374.3	1	1.01565	0.954682	0.804941	0.804738	1.0214	1.06185	0.983943	0.89063	0.823707	0.0214016	0.0461995	0.0292611	0.0856896	0.0189695	0.201521	NO
Q9NX18	Succinate dehydrogenase assembly factor 2, mitochondrial	SDHAF2	31088	25909	30614	23080	22959	30341	27634	28773	26989	27056	30239.2	29055.4	27629.4	26353.7	26631.3	1	0.833408	0.984753	0.742409	0.738516	0.972698	0.934617	0.888748	0.847712	0.856644	-0.0273017	0.101208	-0.0960052	0.105303	0.118127	0.201332	NO
O75864	Protein phosphatase 1 regulatory subunit 37	PPP1R37	19231	19088	19469	20345	19054	25205	18432	19822	19762	18508	25120.5	19380.1	19034.2	19296.8	18217.5	1	0.992564	1.01238	1.05793	0.990796	1.30625	1.00775	0.989764	1.00342	0.947299	0.306249	0.0151866	-0.0226116	-0.0545061	-0.0434973	0.20082	NO
P51153	Ras-related protein Rab-13	RAB13	85056	66038	49206	32888	29802	83641	65360	57688	41254	32798	83360.5	68721.8	55395.1	40282.9	32283.2	1	0.776406	0.578513	0.386663	0.350381	0.980066	0.807959	0.651278	0.473604	0.379552	-0.019934	0.0315534	0.0727655	0.0869411	0.0291715	0.200497	NO
P56537	Eukaryotic translation initiation factor 6	EIF6	381990	330370	356820	271870	275840	408830	332500	377950	300470	284530	407459	349602	362928	293397	280064	1	0.864866	0.934108	0.71172	0.722113	1.06667	0.915213	0.950098	0.768075	0.733171	0.0666743	0.0503474	0.0159901	0.0563543	0.0110581	0.200424	NO
Q6NZ67	Mitotic-spindle organizing protein 2B;Mitotic-spindle organizing protein 2A	MZT2B;MZT2A	15537	14304	12638	11836	10580	16872	13878	14960	12009	10676	16815.4	14591.8	14365.4	11726.3	10508.4	1	0.920641	0.813413	0.761794	0.680955	1.08228	0.939166	0.924593	0.754734	0.676349	0.082282	0.0185246	0.11118	-0.00706042	-0.00460626	0.20032	NO
P20042	Eukaryotic translation initiation factor 2 subunit 2	EIF2S2	869360	807160	858270	620830	660510	896920	797220	905020	711060	705820	893912	838225	869049	694321	694742	1	0.928453	0.987243	0.714123	0.759766	1.02824	0.964186	0.999642	0.798658	0.799141	0.0282414	0.0357333	0.012399	0.0845349	0.0393757	0.200284	NO
P63165	Small ubiquitin-related modifier 1	SUMO1	192650	170760	169000	123160	133320	199880	173770	174160	147300	136570	199210	182708	167238	143832	134426	1	0.886374	0.877239	0.639294	0.692032	1.03405	0.948393	0.868092	0.7466	0.697775	0.0340496	0.0620186	-0.00914686	0.107306	0.00574324	0.199971	NO
Q15653	NF-kappa-B inhibitor beta	NFKBIB	83105	69698	70133	46663	39774	91839	65885	75489	54025	40560	91531	69273.8	72488.6	52753.2	39923.4	1	0.838674	0.843908	0.561494	0.478599	1.10139	0.83357	0.872253	0.634778	0.480397	0.10139	-0.00510432	0.0283451	0.0732835	0.00179751	0.199712	NO
P67870	Casein kinase II subunit beta	CSNK2B	513740	408880	420870	274680	224170	561670	401320	446340	324820	220780	559786	421962	428600	317174	217315	1	0.795889	0.819228	0.534667	0.436349	1.08963	0.821353	0.834274	0.617382	0.423005	0.0896296	0.0254642	0.0150462	0.0827142	-0.0133439	0.19951	NO
Q9ULC3	Ras-related protein Rab-23	RAB23	169610	147190	150660	132100	116710	183320	149900	166320	131920	123140	182705	157610	159709	128815	121207	1	0.867814	0.888273	0.778846	0.688108	1.07721	0.92925	0.941628	0.759475	0.714623	0.0772077	0.0614358	0.0533546	-0.0193707	0.0265151	0.199143	NO
Q13277	Syntaxin-3	STX3	62952	53298	57282	49286	46748	68860	55100	60568	52570	46776	68629.1	57934.1	58160.7	51332.5	46041.8	1	0.846645	0.909931	0.782914	0.742598	1.09018	0.92029	0.923889	0.815422	0.73138	0.0901808	0.0736446	0.0139578	0.0325085	-0.0112178	0.199074	NO
Q8NDV7	Trinucleotide repeat-containing gene 6A protein	TNRC6A	24136	20708	19079	16868	16297	24170	22781	21385	17803	16182	24088.9	23952.7	20535	17383.9	15928	1	0.857971	0.790479	0.698873	0.675215	0.99805	0.992407	0.850805	0.720248	0.659928	-0.00194975	0.134436	0.0603263	0.0213751	-0.0152879	0.1989	NO
P35251	Replication factor C subunit 1	RFC1	305780	259660	270620	207280	212560	342790	258250	268930	231020	223220	341640	271533	258241	225582	219716	1	0.849173	0.885015	0.677873	0.69514	1.11728	0.888002	0.844532	0.737725	0.718544	0.117275	0.038829	-0.0404829	0.0598524	0.0234038	0.198877	NO
O75781	Paralemmin-1	PALM	108920	108490	103340	97637	90921	109330	119480	111420	102970	90242	108963	125625	106992	100546	88825.6	1	0.996052	0.94877	0.89641	0.83475	1.0004	1.15337	0.982294	0.923118	0.815512	0.000397892	0.157322	0.0335247	0.026708	-0.0192381	0.198714	NO
Q5TDH0	Protein DDI1 homolog 2	DDI2	649780	636580	589810	454380	484430	646190	601760	621520	533970	557800	644023	632712	596817	521400	549045	1	0.979685	0.907707	0.699283	0.745529	0.99114	0.973732	0.918491	0.802426	0.84497	-0.00886013	-0.00595337	0.0107839	0.103143	0.0994412	0.198554	NO
P42574	Caspase-3;Caspase-3 subunit p17;Caspase-3 subunit p12	CASP3	430530	388680	369370	272160	310600	480670	386300	355050	331200	312080	479058	406169	340938	323403	307182	1	0.902794	0.857943	0.632151	0.721436	1.11272	0.943417	0.791904	0.751175	0.713497	0.112717	0.040623	-0.066039	0.119024	-0.00793979	0.198385	NO
O14907	Tax1-binding protein 3	TAX1BP3	37920	29789	33066	25209	25913	39144	29821	34562	29603	27380	39012.7	31354.8	33188.3	28906.1	26950.3	1	0.785575	0.871994	0.664794	0.68336	1.02882	0.826868	0.875219	0.762292	0.710713	0.0288165	0.0412935	0.00322529	0.0974982	0.0273537	0.198187	NO
Q9BQ69	O-acetyl-ADP-ribose deacetylase MACROD1	MACROD1	227130	211240	183660	142290	119890	240280	203210	198780	157410	133600	239474	213662	190879	153704	131503	1	0.93004	0.808612	0.626469	0.527847	1.05435	0.940704	0.840397	0.676725	0.578977	0.0543485	0.0106641	0.0317849	0.0502553	0.0511295	0.198182	NO
Q99523	Sortilin	SORT1	112890	99959	96239	78902	69520	121230	107700	99933	80450	72408	120823	113240	95961.1	78556.2	71271.5	1	0.885455	0.852502	0.698928	0.615821	1.07028	1.0031	0.850041	0.695865	0.631336	0.0702757	0.117642	-0.00246191	-0.00306344	0.0155151	0.197907	NO
P53367	Arfaptin-1	ARFIP1	407800	389770	367950	282950	255690	412810	360600	382580	361920	277780	411426	379148	367374	353400	273420	1	0.955787	0.902281	0.693845	0.626999	1.00889	0.929739	0.900868	0.866602	0.670476	0.00889052	-0.0260483	-0.0014124	0.172757	0.0434773	0.197664	NO
Q16619	Cardiotrophin-1	CTF1	11520	10493	10649	9541	8249.3	13434	9503	11193	9217.4	9751.9	13388.9	9991.79	10748.1	9000.42	9598.84	1	0.910851	0.924392	0.828212	0.716085	1.16223	0.867343	0.932997	0.781286	0.833232	0.162235	-0.043508	0.00860455	-0.0469255	0.117147	0.197553	NO
Q96K17	Transcription factor BTF3 homolog 4	BTF3L4	266140	232860	250180	197960	176860	264180	231450	268230	210370	210180	263294	243355	257569	205418	206881	1	0.874953	0.940032	0.743819	0.664537	0.989306	0.914386	0.967795	0.771841	0.777339	-0.0106936	0.0394329	0.0277634	0.028022	0.112802	0.197327	NO
P35579	Myosin-9	MYH9	6109900	5350100	5118600	3817400	3924900	6323900	5212500	5420900	4422200	4286500	6.30269e+06	5.48061e+06	5.20544e+06	4.3181e+06	4.21922e+06	1	0.875644	0.837755	0.624789	0.642384	1.03155	0.897004	0.851968	0.706738	0.690555	0.0315539	0.0213597	0.0142133	0.0819488	0.0481711	0.197247	NO
Q9UKY7	Protein CDV3 homolog	CDV3	762770	661170	680010	521250	594700	823890	631900	700330	612670	623590	821127	664402	672495	598247	613802	1	0.866801	0.891501	0.683365	0.779658	1.07651	0.871038	0.881648	0.784309	0.804702	0.0765066	0.00423702	-0.00985255	0.100945	0.0250433	0.196879	NO
P49321	Nuclear autoantigenic sperm protein	NASP	2494500	2196100	2264300	1736400	1902200	2648100	2169200	2306000	2026600	2002400	2.63922e+06	2.28077e+06	2.21435e+06	1.97889e+06	1.97097e+06	1	0.880377	0.907717	0.696091	0.762558	1.05802	0.914321	0.887691	0.793302	0.790127	0.0580152	0.0339439	-0.0200257	0.097211	0.027569	0.196714	NO
O15118	Niemann-Pick C1 protein	NPC1	59648	56888	54399	43103	45291	65559	54393	54500	48560	49541	65339.1	57190.7	52333.8	47416.9	48763.4	1	0.953729	0.912	0.722623	0.759305	1.09541	0.958804	0.877378	0.794945	0.81752	0.095412	0.00507498	-0.0346223	0.0723222	0.0582152	0.196402	NO
P0DP25			1270600	1065300	1158800	842350	900220	1334200	1047200	1181100	1004700	955640	1.32973e+06	1.10106e+06	1.13416e+06	981049	940641	1	0.838423	0.91201	0.662955	0.7085	1.04653	0.866569	0.892615	0.772115	0.740312	0.0465335	0.0281465	-0.0193954	0.10916	0.0318122	0.196257	NO
Q96S66	Chloride channel CLIC-like protein 1	CLCC1	26770	23749	24695	20967	19065	29468	23515	25868	20637	21746	29369.2	24724.5	24839.9	20151.2	21404.7	1	0.88715	0.922488	0.783227	0.712178	1.09709	0.92359	0.927899	0.752753	0.799577	0.0970927	0.03644	0.00541104	-0.0304746	0.0873994	0.195869	NO
Q5XUX1	F-box/WD repeat-containing protein 9	FBXW9	111050	99865	88821	81440	73982	114400	100230	99941	86125	78655	114016	105385	95968.8	84097.6	77420.5	1	0.89928	0.799829	0.733363	0.666204	1.02671	0.94899	0.864194	0.757295	0.697168	0.0267117	0.0497105	0.0643652	0.0239313	0.0309631	0.195682	NO
P0C7T5	Ataxin-1-like	ATXN1L	24400	27419	22756	16890	18768	26399	27036	25675	18208	18121	26310.5	28426.6	24654.5	17779.4	17836.6	1	1.12373	0.932623	0.692213	0.76918	1.0783	1.16502	1.01043	0.728663	0.731007	0.0782978	0.0412951	0.0778084	0.0364498	-0.038173	0.195678	NO
P62324	Protein BTG1	BTG1	32377	27934	24978	19709	19379	32962	28875	28699	20235	20503	32851.5	30360.2	27558.3	19758.7	20181.2	1	0.862773	0.771474	0.608735	0.598542	1.01465	0.937709	0.85117	0.610268	0.623319	0.0146541	0.0749356	0.0796965	0.00153375	0.0247766	0.195596	NO
Q13442	28 kDa heat- and acid-stable phosphoprotein	PDAP1	905750	788610	845300	668090	745820	1037900	728820	843130	776530	774130	1.03442e+06	766307	809619	758250	761979	1	0.870671	0.93326	0.73761	0.823428	1.14206	0.846047	0.893866	0.837152	0.841269	0.142058	-0.0246238	-0.0393938	0.0995419	0.017841	0.195423	NO
Q92620	Pre-mRNA-splicing factor ATP-dependent RNA helicase PRP16	DHX38	357200	273040	152000	104740	81101	409460	237720	194190	106620	90475	408087	249947	186472	104110	89054.9	1	0.76439	0.425532	0.293225	0.227046	1.14246	0.69974	0.522037	0.291462	0.249314	0.14246	-0.0646496	0.0965055	-0.0017634	0.0222674	0.19482	NO
O43299	AP-5 complex subunit zeta-1	AP5Z1	156260	129930	106990	74010	60639	165420	112770	111150	106320	65239	164865	118570	106732	103817	64215	1	0.831499	0.684692	0.473634	0.388065	1.05507	0.758802	0.683043	0.664387	0.41095	0.0550699	-0.0726972	-0.00164952	0.190754	0.0228851	0.194362	NO
Q9H299	SH3 domain-binding glutamic acid-rich-like protein 3	SH3BGRL3	219260	210610	205490	175360	181940	237960	207610	197650	191260	206480	237162	218288	189794	186758	203239	1	0.960549	0.937198	0.799781	0.829791	1.08165	0.995569	0.865613	0.851763	0.926932	0.0816471	0.0350199	-0.0715852	0.0519823	0.0971411	0.194205	NO
Q8WUF5	RelA-associated inhibitor	PPP1R13L	16439	14920	14798	11138	10379	15475	14450	16963	13077	11370	15423.1	15193.2	16288.8	12769.2	11191.5	1	0.907598	0.900176	0.677535	0.631364	0.938202	0.924219	0.990863	0.77676	0.680792	-0.0617981	0.0166213	0.0906862	0.0992251	0.0494276	0.194162	NO
Q96B23	Uncharacterized protein C18orf25	C18orf25	44159	36142	37981	31135	28340	47080	37298	41709	30425	30912	46922.1	39216.4	40051.2	29708.8	30426.8	1	0.818452	0.860096	0.705066	0.641772	1.06257	0.888073	0.906978	0.672768	0.689029	0.0625718	0.0696218	0.0468815	-0.0322974	0.0472568	0.194034	NO
P22307	Non-specific lipid-transfer protein	SCP2	159090	146720	136880	114150	107160	157560	148950	148780	119610	123450	157032	156611	142867	116794	121512	1	0.922245	0.860393	0.717518	0.673581	0.987061	0.984419	0.898024	0.73414	0.763796	-0.0129387	0.062174	0.0376303	0.0166216	0.0902154	0.193703	NO
Q9NWV4	UPF0587 protein C1orf123	C1orf123	318550	288500	291670	220520	240250	337930	283910	290140	258300	259110	336797	298513	278608	252219	255043	1	0.905666	0.915618	0.692262	0.754199	1.05728	0.937099	0.874614	0.791774	0.800638	0.0572804	0.0314329	-0.0410041	0.0995118	0.0464388	0.19366	NO
P51531	Probable global transcription activator SNF2L2	SMARCA2	136780	155950	85390	56112	67370	103420	148930	102990	63026	109660	103073	156590	98896.6	61542.3	107939	1	1.14015	0.624287	0.410235	0.492543	0.753569	1.14483	0.723034	0.449937	0.789142	-0.246431	0.00468079	0.0987467	0.0397013	0.296599	0.193297	NO
A2RTX5	Probable threonine--tRNA ligase 2, cytoplasmic	TARSL2	5217.6	4591.5	3920.9	2902.4	2645.4	5924.8	4659.9	4183.7	2975.6	2599.4	5904.93	4899.58	4017.42	2905.55	2558.6	1	0.880002	0.751476	0.556271	0.507015	1.13173	0.939049	0.769974	0.556875	0.490379	0.131733	0.0590468	0.018498	0.000604287	-0.0166359	0.193246	NO
Q969F1	General transcription factor 3C polypeptide 6	GTF3C6	13035	10985	8542.9	5921.2	5558.1	13901	10440	10248	7192.1	4942.6	13854.4	10977	9840.68	7022.79	4865.02	1	0.842731	0.655382	0.454254	0.426398	1.06286	0.842116	0.754943	0.538764	0.373228	0.06286	-0.000615034	0.0995615	0.0845105	-0.0531705	0.193146	NO
Q8WUH6	Transmembrane protein 263	TMEM263	275300	249230	266740	185880	189180	259730	235550	262730	229950	239780	258859	247666	252288	224537	236016	1	0.905303	0.968907	0.675191	0.687178	0.940279	0.899621	0.91641	0.815608	0.857307	-0.0597205	-0.00568271	-0.052497	0.140417	0.170129	0.192646	NO
Q9HA64	Ketosamine-3-kinase	FN3KRP	224180	208120	202120	175450	171110	232800	201590	230820	181580	184100	232019	211959	221646	177306	181210	1	0.928361	0.901597	0.78263	0.763271	1.03497	0.945485	0.988696	0.790907	0.808326	0.0349686	0.0171238	0.087099	0.00827691	0.0450549	0.192523	NO
Q08495	Dematin	DMTN	57050	52848	50271	42974	40695	62407	52099	54480	42176	45054	62197.7	54778.7	52314.6	41183.2	44346.8	1	0.926345	0.881174	0.753269	0.713322	1.09023	0.960188	0.916996	0.721878	0.777333	0.0902315	0.0338426	0.035822	-0.0313908	0.0640113	0.192517	NO
P05387	60S acidic ribosomal protein P2	RPLP2	365970	268150	299580	261500	356380	413220	253590	298940	290540	378710	411834	266633	287058	283701	372766	1	0.73271	0.818592	0.714539	0.973796	1.12532	0.728566	0.784377	0.775202	1.01857	0.125322	-0.00414394	-0.0342149	0.0606622	0.0447738	0.192399	NO
Q13542	Eukaryotic translation initiation factor 4E-binding protein 2	EIF4EBP2	27807	31093	27954	27903	29661	30163	32069	35186	26870	26371	30061.8	33718.5	33787.5	26237.5	25957.1	1	1.11817	1.00529	1.00345	1.06667	1.08109	1.21259	1.21507	0.943556	0.933473	0.081089	0.0944177	0.209785	-0.0598962	-0.133201	0.192195	NO
Q8NFI3	Cytosolic endo-beta-N-acetylglucosaminidase	ENGASE	13233	10476	8041.3	4847.6	3283.5	15003	10180	9880.6	4366.4	3057.1	14952.7	10703.6	9487.89	4263.61	3009.12	1	0.791657	0.60767	0.366327	0.24813	1.12995	0.808857	0.716987	0.322195	0.227395	0.129954	0.0172002	0.109317	-0.0441311	-0.0207348	0.191605	NO
Q8NEZ2	Vacuolar protein sorting-associated protein 37A	VPS37A	34630	32626	23778	22112	19645	40383	32502	26358	22051	18437	40247.6	34173.7	25310.4	21531.9	18147.6	1	0.942131	0.68663	0.638522	0.567283	1.16222	0.986825	0.73088	0.62177	0.524043	0.162217	0.0446938	0.04425	-0.0167511	-0.0432394	0.19117	NO
P20248	Cyclin-A2	CCNA2	240880	211340	186090	133940	145500	263320	203970	179570	159670	161060	262437	214461	172433	155911	158532	1	0.877366	0.772542	0.556045	0.604035	1.08949	0.890324	0.715845	0.647257	0.658137	0.0894923	0.0129576	-0.056697	0.0912126	0.0541018	0.191067	NO
P52788	Spermine synthase	SMS	954870	842690	845180	624460	591970	985630	818180	873890	733350	654030	982324	860263	839156	716087	643765	1	0.882518	0.885126	0.653974	0.619948	1.02875	0.900922	0.878818	0.749931	0.674191	0.0287521	0.0184038	-0.00630822	0.0959571	0.0542425	0.191047	NO
Q8WXD5	Gem-associated protein 6	GEMIN6	167770	148200	151000	113950	132990	159130	155510	154230	141960	139310	158596	163509	148100	138618	137123	1	0.883352	0.900042	0.679204	0.792692	0.94532	0.9746	0.882756	0.826239	0.81733	-0.0546801	0.091248	-0.0172856	0.147036	0.0246375	0.190956	NO
Q99611	Selenide, water dikinase 2	SEPHS2	86205	79079	78799	61987	66565	90322	78624	76412	70425	75450	90019.1	82668	73374.9	68767.2	74265.8	1	0.917337	0.914089	0.719065	0.772171	1.04424	0.95897	0.851168	0.797717	0.861502	0.0442444	0.0416338	-0.0629205	0.0786516	0.0893308	0.19094	NO
Q6PII3	Coiled-coil domain-containing protein 174	CCDC174	85377	85503	77513	62290	72783	93663	81806	75689	73077	77572	93348.9	86013.7	72680.7	71356.7	76354.5	1	1.00148	0.907891	0.729588	0.85249	1.09337	1.00746	0.851291	0.835784	0.894321	0.0933727	0.00598176	-0.0565999	0.106196	0.0418315	0.190783	NO
P05204	Non-histone chromosomal protein HMG-17	HMGN2	193090	162690	187040	171280	190720	242820	159500	171550	187970	186560	242006	167704	164732	183545	183632	1	0.84256	0.968667	0.887047	0.987726	1.25333	0.868527	0.853134	0.950568	0.951017	0.253331	0.0259667	-0.115534	0.0635201	-0.0367093	0.190575	NO
P61916	Epididymal secretory protein E1	NPC2	471170	433460	436000	342160	408300	502760	426220	428710	405230	431020	501074	448143	411671	395691	424255	1	0.919965	0.925356	0.726192	0.866566	1.06347	0.951127	0.87372	0.839805	0.900428	0.0634673	0.0311622	-0.0516363	0.113612	0.0338622	0.190468	NO
Q9C005	Protein dpy-30 homolog	DPY30	49389	53518	46753	43004	49392	58971	54129	42117	43722	53475	58773.2	56913.1	40443	42692.8	52635.7	1	1.0836	0.946628	0.87072	1.00006	1.19001	1.15234	0.818867	0.864418	1.06574	0.190006	0.0687427	-0.127761	-0.00630175	0.065676	0.190363	NO
Q5HYJ3	Protein FAM76B	FAM76B	115530	102180	85153	65072	59951	117510	105190	95378	72588	60632	117116	110600	91587.1	70879.2	59680.3	1	0.884446	0.737064	0.563248	0.518921	1.01373	0.957331	0.792756	0.613514	0.516579	0.0137272	0.0728855	0.0556922	0.0502661	-0.00234279	0.190228	NO
Q71F23	Centromere protein U	CENPU	32397	25551	29181	21602	22695	36351	26172	30139	23401	22400	36229.1	27518.2	28941.1	22850.1	22048.4	1	0.788684	0.900732	0.66679	0.700528	1.11829	0.849405	0.893327	0.705316	0.68057	0.118285	0.0607205	-0.00740504	0.0385261	-0.0199581	0.190169	NO
Q8IYB7	DIS3-like exonuclease 2	DIS3L2	719540	656650	659610	524200	533530	721980	642950	685430	618580	581400	719559	676020	658187	604018	572275	1	0.912597	0.916711	0.728521	0.741488	1.00003	0.939517	0.914733	0.839451	0.795334	2.5968e-05	0.0269203	-0.00197768	0.11093	0.0538462	0.189744	NO
Q6AI12	Ankyrin repeat domain-containing protein 40	ANKRD40	7201	6251.2	6912.7	4917.6	4670.2	8354.8	6218.8	6607.6	5497	4816	8326.78	6538.66	6344.98	5367.6	4740.41	1	0.868102	0.959964	0.682905	0.648549	1.15634	0.908022	0.881124	0.745396	0.658299	0.156337	0.0399201	-0.0788397	0.062491	0.00974996	0.189658	NO
Q9NX01	Thioredoxin-like protein 4B	TXNL4B	89604	82628	79657	68404	63427	95827	77715	84700	70090	74819	95505.6	81712.3	81333.5	68440	73644.7	1	0.922146	0.888989	0.763403	0.707859	1.06586	0.911927	0.9077	0.763806	0.82189	0.0658634	-0.0102196	0.0187104	0.000402296	0.114031	0.188788	NO
O00232	26S proteasome non-ATPase regulatory subunit 12	PSMD12	951310	820690	838080	613060	607620	1043800	781370	856430	729550	623440	1.0403e+06	821560	822390	712376	613655	1	0.862695	0.880975	0.644438	0.638719	1.09354	0.863609	0.864482	0.748837	0.645063	0.0935441	0.000914411	-0.0164926	0.104399	0.00634353	0.188709	NO
P24534	Elongation factor 1-beta	EEF1B2	690940	650340	626300	468880	475340	694680	648870	661460	525630	527430	692350	682245	635170	513256	519152	1	0.941239	0.906446	0.678612	0.687961	1.00204	0.987415	0.919283	0.742838	0.75137	0.00204105	0.0461758	0.0128371	0.0642261	0.0634087	0.188689	NO
P60510	Serine/threonine-protein phosphatase 4 catalytic subunit	PPP4C	371840	325520	343630	268770	243260	387470	324510	358160	297240	265810	386171	341201	343925	290243	261638	1	0.87543	0.924134	0.722811	0.654206	1.03854	0.917602	0.924926	0.780558	0.70363	0.0385395	0.042172	0.00079232	0.0577475	0.0494243	0.188676	NO
Q15334	Lethal(2) giant larvae protein homolog 1	LLGL1	201360	182130	168640	112740	90441	226230	172510	182760	123050	92167	225471	181383	175496	120153	90720.4	1	0.904499	0.837505	0.559893	0.449151	1.11974	0.90079	0.871554	0.596709	0.450538	0.119742	-0.00370938	0.0340487	0.0368164	0.00138743	0.188285	NO
P35226	Polycomb complex protein BMI-1	BMI1	44326	33085	31059	19396	17944	44282	34261	34725	21956	19520	44133.5	36023.2	33344.8	21439.1	19213.6	1	0.746402	0.700695	0.437576	0.404819	0.995657	0.812688	0.752263	0.48367	0.433462	-0.00434303	0.0662866	0.0515685	0.0460936	0.0286428	0.188248	NO
O95218	Zinc finger Ran-binding domain-containing protein 2	ZRANB2	675180	597900	577830	429840	466100	692370	592300	610650	496440	497360	690048	622765	586379	484754	489554	1	0.885542	0.855816	0.63663	0.690334	1.02202	0.922369	0.868478	0.717962	0.725071	0.0220208	0.0368273	0.0126621	0.0813317	0.0347368	0.187579	NO
Q9NVL1	Protein FAM86C1;Putative protein FAM86C2P;Putative protein N-methyltransferase FAM86B1;Protein-lysine N-methyltransferase EEF2KMT;Putative protein N-methyltransferase FAM86B2	FAM86C1;FAM86C2P;FAM86B1;EEF2KMT;FAM86B2	15082	11162	10365	6017.4	4407.1	15030	12475	10905	6371.2	5151.7	14979.6	13116.7	10471.6	6221.22	5070.84	1	0.740088	0.687243	0.398979	0.292209	0.99321	0.869689	0.694309	0.412493	0.336218	-0.00678997	0.129602	0.00706612	0.013514	0.0440088	0.187401	NO
Q6ZUM4	Rho GTPase-activating protein 27	ARHGAP27	64222	57054	56130	50709	40169	65032	57046	63637	51821	44514	64813.9	59980.2	61107.7	50601.1	43815.3	1	0.888387	0.874	0.789589	0.625471	1.00922	0.933951	0.951507	0.787909	0.682248	0.00921649	0.0455634	0.0775076	-0.00167998	0.0567768	0.187384	NO
Q15631	Translin	TSN	566910	505940	506280	383130	393190	576840	497030	520160	446750	435180	574905	522595	499486	436233	428350	1	0.892452	0.893052	0.675822	0.693567	1.0141	0.92183	0.881067	0.769493	0.755586	0.0141035	0.0293782	-0.0119846	0.0936715	0.0620196	0.187188	NO
P51157	Ras-related protein Rab-28	RAB28	34761	22120	14418	7605.9	7968.8	39747	19584	14370	11811	7966.6	39613.7	20591.3	13798.9	11533	7841.56	1	0.636345	0.414775	0.218806	0.229245	1.1396	0.592368	0.396964	0.331779	0.225585	0.139602	-0.0439773	-0.0178116	0.112973	-0.00366047	0.187126	NO
O95551	Tyrosyl-DNA phosphodiesterase 2	TDP2	199650	176650	168080	120660	113080	213620	176950	175240	136030	117190	212904	186051	168275	132828	115351	1	0.884798	0.841873	0.604358	0.566391	1.06638	0.931888	0.84285	0.665303	0.577764	0.0663841	0.0470897	0.00097637	0.0609456	0.011373	0.186769	NO
P82909	28S ribosomal protein S36, mitochondrial	MRPS36	87376	79684	81313	63081	67957	99737	73860	81119	71937	71650	99402.5	77659	77894.9	70243.6	70525.4	1	0.911967	0.93061	0.721949	0.777754	1.13764	0.888791	0.89149	0.803923	0.807148	0.137641	-0.0231757	-0.03912	0.0819741	0.0293948	0.186714	NO
Q15836	Vesicle-associated membrane protein 3;Vesicle-associated membrane protein 2	VAMP3;VAMP2	59177	53654	43101	31146	25748	70552	45192	47111	35069	26919	70315.4	47516.5	45238.5	34243.5	26496.5	1	0.90667	0.72834	0.526319	0.435101	1.18822	0.802955	0.764461	0.578662	0.44775	0.188222	-0.103715	0.036121	0.0523423	0.0126483	0.185618	NO
Q9BZ23	Pantothenate kinase 2, mitochondrial	PANK2	107170	99530	95875	83256	79748	111790	96610	108860	86940	84374	111415	101579	104533	84893.4	83049.7	1	0.928711	0.894607	0.776859	0.744126	1.03961	0.947832	0.975397	0.792138	0.774934	0.0396108	0.0191206	0.08079	0.0152784	0.030808	0.185608	NO
Q5U5X0	Complex III assembly factor LYRM7	LYRM7	102250	84867	81415	53448	51173	107090	81785	87061	66605	51553	106731	85991.6	83600.7	65037.1	50743.8	1	0.829995	0.796235	0.522719	0.500469	1.04382	0.840994	0.817611	0.63606	0.496272	0.0438225	0.0109988	0.0213759	0.113341	-0.00419718	0.185341	NO
Q9Y315	Deoxyribose-phosphate aldolase	DERA	296440	276280	260380	201360	215700	311170	269850	255170	233220	242080	310126	283730	245028	227730	238280	1	0.931993	0.878356	0.679261	0.727635	1.04617	0.957124	0.826569	0.768216	0.803806	0.0461693	0.0251308	-0.0517877	0.0889552	0.0761718	0.184639	NO
Q6PCE3	Glucose 1,6-bisphosphate synthase	PGM2L1	448180	418950	400680	330120	332820	498300	400070	396970	374500	354870	496629	420648	381192	365684	349300	1	0.934781	0.894016	0.736579	0.742603	1.1081	0.938569	0.850533	0.815931	0.779374	0.108101	0.0037879	-0.0434824	0.0793522	0.0367711	0.18453	NO
Q32M88	Acid trehalase-like protein 1	ATHL1	42540	38701	40132	34532	31865	42108	37884	47628	37015	32416	41966.8	39832.6	45735	36143.6	31907.2	1	0.909756	0.943394	0.811754	0.74906	0.986525	0.936356	1.07511	0.849639	0.750052	-0.0134748	0.0266001	0.131711	0.0378855	0.000992188	0.183714	NO
P12814	Alpha-actinin-1	ACTN1	1458500	1298100	1318400	1057000	1113400	1555100	1242900	1352700	1198600	1206200	1.54988e+06	1.30683e+06	1.29894e+06	1.17038e+06	1.18727e+06	1	0.890024	0.903942	0.724717	0.763387	1.06266	0.896009	0.890597	0.802458	0.814033	0.0626566	0.00598475	-0.0133454	0.0777404	0.0506464	0.183683	NO
P06280	Alpha-galactosidase A	GLA	343310	339940	304830	242410	272290	328590	344250	324930	272070	303460	327488	361957	312015	265665	298697	1	0.990184	0.887915	0.706097	0.793132	0.953913	1.05431	0.908844	0.773835	0.87005	-0.0460866	0.0641302	0.0209297	0.0677386	0.0769188	0.183631	NO
Q9NS18	Glutaredoxin-2, mitochondrial	GLRX2	30347	27567	27906	24212	22869	34350	26470	26468	26593	25412	34234.8	27831.5	25416	25967	25013.1	1	0.908393	0.919564	0.797838	0.753584	1.12811	0.917108	0.837513	0.855669	0.824238	0.128112	0.00871548	-0.0820507	0.0578307	0.0706541	0.183261	NO
Q99717	Mothers against decapentaplegic homolog 5	SMAD5	15527	14289	9726.1	10194	8020.3	18741	14046	11480	8333.4	8121.6	18678.1	14768.5	11023.7	8137.23	7994.13	1	0.920268	0.626399	0.656534	0.516539	1.20295	0.951147	0.709971	0.52407	0.514853	0.202946	0.030879	0.0835717	-0.132464	-0.00168573	0.183247	NO
P84090	Enhancer of rudimentary homolog	ERH	245720	229840	212690	165860	167860	262780	222710	218800	191570	176540	261899	234165	210104	187060	173769	1	0.935374	0.865579	0.674996	0.683135	1.06584	0.952975	0.855053	0.761274	0.707183	0.0658421	0.0176018	-0.0105258	0.0862785	0.024048	0.183245	NO
Q9Y6I3	Epsin-1	EPN1	306100	282530	288210	250950	256710	356240	277780	299030	267040	249430	355045	292068	287145	260754	245515	1	0.922999	0.941555	0.81983	0.838648	1.1599	0.954158	0.938075	0.851858	0.802075	0.1599	0.0311586	-0.00347994	0.0320279	-0.036573	0.183033	NO
Q9UNA4	DNA polymerase iota	POLI	7553.4	6937.2	6105.4	9012.6	6356.8	9051.8	8484.7	7265.6	7094.5	5587.2	9021.44	8921.11	6976.82	6927.49	5499.5	1	0.918421	0.808298	1.19318	0.841581	1.19436	1.18107	0.923666	0.917136	0.728083	0.194355	0.262652	0.115368	-0.276049	-0.113498	0.182828	NO
Q9NYJ1	Cytochrome c oxidase assembly factor 4 homolog, mitochondrial	COA4	193510	173140	167560	161000	144430	224430	167590	182620	155780	149980	223677	176210	175362	152113	147626	1	0.894734	0.865898	0.831998	0.74637	1.1559	0.910599	0.906215	0.786072	0.762885	0.155895	0.0158649	0.0403163	-0.045926	0.0165157	0.182666	NO
A8MXV4	Nucleoside diphosphate-linked moiety X motif 19, mitochondrial	NUDT19	12422	10693	7867.2	7324.3	5568.2	15083	10420	9777.1	5695	5287.6	15032.4	10956	9388.5	5560.94	5204.61	1	0.860811	0.633328	0.589623	0.448253	1.21014	0.88198	0.755796	0.447668	0.418983	0.210145	0.0211684	0.122468	-0.141955	-0.0292701	0.182556	NO
Q9BSY4	Coiled-coil-helix-coiled-coil-helix domain-containing protein 5	CHCHD5	106890	94018	98714	77522	78546	113480	91379	99672	85795	87890	113099	96079.1	95710.4	83775.3	86510.5	1	0.879577	0.92351	0.72525	0.73483	1.05809	0.89886	0.895411	0.783753	0.809341	0.0580917	0.0192824	-0.0280995	0.0585026	0.0745112	0.182288	NO
P09417	Dihydropteridine reductase	QDPR	465840	418860	436320	366760	362600	475690	418310	439390	397520	417660	474095	439826	421926	388162	411105	1	0.89915	0.936631	0.787309	0.778379	1.01772	0.944156	0.905732	0.833252	0.882502	0.01772	0.0450065	-0.0308989	0.0459432	0.104123	0.181894	NO
Q7Z4V5	Hepatoma-derived growth factor-related protein 2	HDGFRP2	616140	556100	559670	474340	477670	668780	546190	572300	525380	500010	666537	574283	549553	513012	492162	1	0.902555	0.908349	0.769857	0.775262	1.08179	0.932066	0.891929	0.832623	0.798783	0.0817949	0.0295117	-0.0164193	0.0627654	0.0235206	0.181173	NO
Q8N183	Mimitin, mitochondrial	NDUFAF2	46336	39245	40166	41139	32558	47556	42274	51687	34635	33055	47396.5	44448.4	49632.7	33819.7	32536.2	1	0.846966	0.866842	0.887841	0.70265	1.02289	0.959262	1.07115	0.729879	0.702179	0.0228874	0.112296	0.204305	-0.157962	-0.000470949	0.181056	NO
Q8WU58	Protein FAM222B	FAM222B	21775	18861	18153	15650	13973	21148	20763	19241	16228	15364	21077.1	21830.9	18476.2	15846	15122.9	1	0.866177	0.833662	0.718714	0.641699	0.967948	1.00257	0.848507	0.727715	0.694505	-0.0320516	0.136393	0.014845	0.00900046	0.052806	0.180992	NO
P0DP91	DNA excision repair protein ERCC-6	ERCC6	2255.2	2300.3	2971.5	3091.4	2089.3	3028	2660.8	2714.6	2543	2245.6	3017.84	2797.66	2606.71	2483.14	2210.35	1	1.02	1.31762	1.37079	0.926437	1.33817	1.24054	1.15586	1.10107	0.980114	0.338172	0.220539	-0.161757	-0.269716	0.0536776	0.180915	NO
Q9BXV9	Uncharacterized protein C14orf142	C14orf142	135880	117450	125310	101670	114500	141610	121890	123890	116130	119610	141135	128159	118966	113396	117733	1	0.864366	0.922211	0.748234	0.842655	1.03867	0.943181	0.875522	0.834532	0.866446	0.0386744	0.0788154	-0.0466891	0.0862985	0.0237904	0.18089	NO
Q9NX63	MICOS complex subunit MIC19	CHCHD3	5003.2	6410.9	5143.1	5522.9	5477.6	6444.5	6138.5	6106.3	5350.4	4568.8	6422.89	6454.23	5863.6	5224.45	4497.09	1	1.28136	1.02796	1.10387	1.09482	1.28376	1.29002	1.17197	1.04422	0.898843	0.283756	0.0086614	0.144008	-0.059652	-0.195977	0.180796	NO
P63208	S-phase kinase-associated protein 1	SKP1	611920	515400	541950	401320	414040	638620	520200	544010	465620	441630	636478	546957	522388	454659	434698	1	0.842267	0.885655	0.655837	0.676624	1.04013	0.893837	0.853687	0.743004	0.710384	0.0401331	0.0515698	-0.0319685	0.0871668	0.0337598	0.180661	NO
O00193	Small acidic protein	SMAP	253240	225590	234830	202870	204520	264020	225000	240090	219440	225660	263135	236573	230547	214274	222118	1	0.890815	0.927302	0.801098	0.807613	1.03907	0.934185	0.910391	0.846131	0.877105	0.0390718	0.0433696	-0.0169112	0.0450335	0.0694918	0.180056	NO
P17661	Desmin	DES	60138	36848	52072	50618	40449	91244	30195	53704	51659	26668	90938	31748.1	51569.5	50442.9	26249.4	1	0.612724	0.865875	0.841697	0.672603	1.51216	0.527921	0.857519	0.838786	0.436487	0.512155	-0.0848035	-0.00835599	-0.00291127	-0.236116	0.179968	NO
Q9UIV1	CCR4-NOT transcription complex subunit 7	CNOT7	54621	47244	44157	37277	34373	55387	49101	50754	37675	35706	55201.2	51626.5	48736.7	36788.1	35145.6	1	0.864942	0.808425	0.682466	0.6293	1.01062	0.945177	0.892271	0.673516	0.643444	0.0106232	0.080235	0.0838457	-0.00895055	0.0141442	0.179898	NO
P63241	Eukaryotic translation initiation factor 5A-1;Eukaryotic translation initiation factor 5A-1-like	EIF5A;EIF5AL1	970740	882110	804830	562310	472100	1157900	840220	825320	625500	432550	1.15402e+06	883437	792517	610775	425761	1	0.908699	0.829089	0.579259	0.48633	1.1888	0.910065	0.816405	0.629185	0.438594	0.188801	0.00136684	-0.0126842	0.0499263	-0.0477359	0.179674	NO
Q9BUR4	Telomerase Cajal body protein 1	WRAP53	111580	108500	101610	87986	83827	127390	105730	107440	88939	86758	126963	111168	103170	86845.3	85396.3	1	0.972396	0.910647	0.788546	0.751273	1.13786	0.99631	0.924625	0.778323	0.765337	0.137863	0.0239132	0.0139783	-0.0102229	0.0140641	0.179596	NO
P49356	Protein farnesyltransferase subunit beta	FNTB	49993	46548	42209	30962	31734	47122	46930	44815	34035	38436	46964	49343.9	43033.8	33233.8	37832.7	1	0.93109	0.844298	0.619327	0.634769	0.939411	0.987015	0.860796	0.664769	0.75676	-0.0605892	0.0559249	0.0164981	0.0454424	0.121991	0.179268	NO
Q14562	ATP-dependent RNA helicase DHX8	DHX8	13396	10821	11876	9463.2	7589.2	15248	10868	12559	9501.8	7700.8	15196.9	11427	12059.8	9278.12	7579.93	1	0.807778	0.886533	0.70642	0.566527	1.13443	0.853016	0.900256	0.692604	0.565835	0.134433	0.0452372	0.0137229	-0.0138158	-0.000691966	0.178885	NO
P29218	Inositol monophosphatase 1	IMPA1	482400	457880	450870	379980	356110	480040	453920	473480	404690	414310	478430	477267	454661	395163	407807	1	0.949171	0.934639	0.787687	0.738205	0.99177	0.98936	0.942498	0.819161	0.845371	-0.00822951	0.0401896	0.00785888	0.0314747	0.107166	0.17846	NO
P63146	Ubiquitin-conjugating enzyme E2 B	UBE2B	59726	50101	52071	37203	41226	61138	47912	53306	47235	43021	60933	50376.4	51187.3	46123.1	42345.8	1	0.838847	0.871831	0.622895	0.690252	1.02021	0.843458	0.857036	0.772244	0.709	0.0202083	0.00461041	-0.0147958	0.14935	0.0187482	0.178121	NO
P55209	Nucleosome assembly protein 1-like 1	NAP1L1	557650	486700	465890	290530	278500	619240	484540	476190	355800	251220	617163	509462	457263	347424	247277	1	0.87277	0.835452	0.52099	0.499417	1.10672	0.913588	0.819983	0.623015	0.443427	0.106722	0.0408184	-0.0154695	0.102025	-0.0559905	0.178105	NO
Q8ND76	Cyclin-Y	CCNY	34116	32072	30474	27363	25832	37044	30608	33223	29774	26265	36919.8	32182.3	31902.5	29073.1	25852.8	1	0.940087	0.893247	0.802058	0.757181	1.08218	0.943321	0.935119	0.852184	0.75779	0.0821833	0.00323389	0.0418725	0.0501262	0.000608278	0.178024	NO
P20962	Parathymosin	PTMS	201480	163080	184010	141450	152780	218550	167700	184890	157660	155470	217817	176326	177541	153949	153030	1	0.80941	0.913292	0.702055	0.758289	1.08109	0.875152	0.881186	0.764089	0.759528	0.0810852	0.0657419	-0.0321055	0.062034	0.00123976	0.177995	NO
Q9UHP3	Ubiquitin carboxyl-terminal hydrolase 25	USP25	590870	523140	463390	276670	234100	638200	501800	503660	324820	232250	636060	527610	483642	317174	228605	1	0.885372	0.78425	0.468242	0.396195	1.07648	0.892938	0.818525	0.536791	0.386895	0.0764799	0.00756539	0.0342742	0.0685491	-0.0093004	0.177568	NO
O43396	Thioredoxin-like protein 1	TXNL1	441240	378220	379510	287540	301890	469300	383630	387940	311570	323950	467726	403362	372521	304235	318865	1	0.857175	0.860099	0.651663	0.684185	1.06003	0.914156	0.844259	0.689501	0.722657	0.0600265	0.0569805	-0.0158395	0.0378377	0.038472	0.177477	NO
Q92625	Ankyrin repeat and SAM domain-containing protein 1A	ANKS1A	164860	134760	127480	96424	90159	183020	130420	129830	110330	92399	182406	137128	124670	107733	90948.7	1	0.817421	0.773262	0.584884	0.546882	1.10643	0.831786	0.756216	0.65348	0.551673	0.106431	0.0143648	-0.017046	0.0685963	0.00479032	0.177136	NO
Q9BV79	Trans-2-enoyl-CoA reductase, mitochondrial	MECR	246170	255260	198870	157880	175750	239250	247620	211560	173410	209510	238448	260356	203151	169328	206222	1	1.03693	0.807856	0.641345	0.713938	0.96863	1.05763	0.825248	0.687849	0.83772	-0.0313701	0.0207027	0.0173919	0.0465038	0.123783	0.177011	NO
Q9Y4F3	Meiosis arrest female protein 1	KIAA0430	19455	18336	16373	12096	11594	21803	15880	16836	14491	12753	21729.9	16696.8	16166.8	14149.9	12552.8	1	0.942483	0.841583	0.621742	0.595939	1.11693	0.858226	0.830986	0.727313	0.645224	0.11693	-0.0842565	-0.0105968	0.105571	0.0492846	0.176932	NO
Q96EK6	Glucosamine 6-phosphate N-acetyltransferase	GNPNAT1	326890	279160	294030	241240	242920	358380	257800	294510	275060	266590	357178	271060	282804	268585	262406	1	0.853988	0.899477	0.737985	0.743125	1.09266	0.829209	0.865136	0.821637	0.802734	0.0926553	-0.024779	-0.0343405	0.0836519	0.0596093	0.176797	NO
Q86WP2	Vasculin	GPBP1	18892	16280	13247	10000	9480.7	21193	14519	16052	10999	8826.9	21121.9	15265.8	15414	10740.1	8688.36	1	0.86174	0.701196	0.529325	0.501837	1.11804	0.808056	0.815901	0.568499	0.459896	0.118035	-0.0536848	0.114705	0.0391742	-0.0419407	0.176289	NO
P04075	Fructose-bisphosphate aldolase A	ALDOA	4722500	4401700	4287300	3708300	3726400	5202100	4213100	4331600	3975400	4086400	5.18465e+06	4.4298e+06	4.15944e+06	3.88182e+06	4.02226e+06	1	0.93207	0.907845	0.785241	0.789074	1.09786	0.93802	0.88077	0.821984	0.851723	0.0978621	0.00595055	-0.0270753	0.0367426	0.0626492	0.176129	NO
Q14061	Cytochrome c oxidase copper chaperone	COX17	90892	67373	78692	56536	51373	100390	64491	76162	64919	57359	100053	67808.1	73134.9	63390.8	56458.7	1	0.741242	0.865775	0.622013	0.565209	1.10079	0.746029	0.804635	0.69743	0.621163	0.100793	0.00478705	-0.0611399	0.0754167	0.0559533	0.175811	NO
Q9UEE9	Craniofacial development protein 1	CFDP1	284970	253110	255520	196270	208640	283730	255830	273320	225210	217860	282778	268989	262457	219908	214441	1	0.888199	0.896656	0.688739	0.732147	0.99231	0.943919	0.920997	0.77169	0.752502	-0.00769046	0.0557204	0.0243417	0.0829507	0.0203549	0.175677	NO
Q8WTR2	Dual specificity protein phosphatase 19	DUSP19	33687	34277	27872	25508	25243	31591	37444	34398	24961	24625	31485.1	39369.9	33030.8	24373.4	24238.5	1	1.01751	0.827381	0.757206	0.74934	0.934635	1.1687	0.980521	0.723526	0.719521	-0.0653649	0.151184	0.15314	-0.0336805	-0.0298188	0.17546	NO
P54105	Methylosome subunit pICln	CLNS1A	330640	300860	291160	237950	221200	379710	292880	296090	254790	223830	378437	307944	284322	248792	220317	1	0.909932	0.880595	0.719665	0.669006	1.14456	0.931358	0.859913	0.752456	0.666334	0.144558	0.0214261	-0.0206822	0.0327913	-0.0026711	0.175422	NO
Q58FG1	Putative heat shock protein HSP 90-alpha A4	HSP90AA4P	31308	30383	26754	21708	18414	28188	28793	33723	23272	20910	28093.5	30274	32382.6	22724.2	20581.8	1	0.970455	0.854542	0.693369	0.588156	0.897325	0.966972	1.03433	0.725826	0.657398	-0.102675	-0.00348242	0.179783	0.0324571	0.0692412	0.175324	NO
Q9H7L9	Sin3 histone deacetylase corepressor complex component SDS3	SUDS3	109570	96299	98102	81284	78145	122010	92690	106740	94213	70151	121601	97457.5	102498	91995.2	69049.9	1	0.878881	0.895336	0.741845	0.713197	1.1098	0.889454	0.935452	0.839602	0.63019	0.1098	0.0105734	0.0401161	0.0977565	-0.0830069	0.175239	NO
Q9NXE8	Pre-mRNA-splicing factor CWC25 homolog	CWC25	37748	35507	33699	28501	29614	41643	36682	33827	30860	29454	41503.3	38568.7	32482.5	30133.5	28991.7	1	0.940633	0.892736	0.755033	0.784518	1.09948	1.02174	0.86051	0.798282	0.768033	0.0994845	0.0811101	-0.0322264	0.0432484	-0.0164857	0.175131	NO
Q96B26	Exosome complex component RRP43	EXOSC8	415070	369880	351910	215900	191160	433590	366120	367450	262000	193770	432136	384951	352845	255832	190729	1	0.891127	0.847833	0.520153	0.460549	1.04112	0.927437	0.850086	0.61636	0.45951	0.0411156	0.0363106	0.00225354	0.0962064	-0.00103924	0.174847	NO
Q8N1G0	Zinc finger protein 687	ZNF687	19187	15358	14145	10571	10288	22092	14821	13217	12419	10651	22017.9	15583.3	12691.7	12126.7	10483.8	1	0.800438	0.737218	0.550946	0.536196	1.14754	0.812181	0.661473	0.632024	0.546403	0.147543	0.0117434	-0.0757451	0.0810784	0.0102061	0.174826	NO
Q96FS4	Signal-induced proliferation-associated protein 1	SIPA1	84925	70983	69857	53808	53754	89565	67730	78491	60093	54477	89264.6	71213.7	75371.3	58678.4	53621.9	1	0.835832	0.822573	0.633594	0.632958	1.0511	0.838548	0.887504	0.690944	0.631404	0.0510995	0.00271655	0.0649315	0.0573492	-0.00155497	0.174542	NO
Q5TAX3	Terminal uridylyltransferase 4	ZCCHC11	417000	353360	354560	270160	213460	428620	351760	380960	301590	227520	427183	369853	365818	294490	223949	1	0.847386	0.850264	0.647866	0.511894	1.02442	0.886937	0.877262	0.706212	0.537048	0.0244185	0.0395512	0.0269986	0.0583463	0.0251533	0.174468	NO
O75380	NADH dehydrogenase [ubiquinone] iron-sulfur protein 6, mitochondrial	NDUFS6	42293	41339	40022	30201	28066	45471	43798	37969	31064	31621	45318.5	46050.8	36459.9	30332.7	31124.7	1	0.977443	0.946303	0.71409	0.663609	1.07154	1.08885	0.862079	0.717205	0.73593	0.0715367	0.111407	-0.0842246	0.0031149	0.0723213	0.174156	NO
Q5PRF9	Protein Smaug homolog 2	SAMD4B	70907	69299	64515	52048	47141	75164	67801	69217	53377	52269	74911.9	71288.4	66465.9	52120.5	51448.6	1	0.977322	0.909854	0.734032	0.664829	1.05648	1.00538	0.937367	0.735054	0.725579	0.0564813	0.0280558	0.0275136	0.00102218	0.06075	0.173823	NO
O43617	Trafficking protein particle complex subunit 3	TRAPPC3	376350	317060	284390	198960	188470	371210	312810	315890	231580	205500	369965	328899	303335	226128	202275	1	0.84246	0.755653	0.528657	0.500784	0.983035	0.873919	0.805991	0.600846	0.537464	-0.0169654	0.0314586	0.0503379	0.0721894	0.03668	0.173701	NO
Q8N4T0	Carboxypeptidase A6	CPA6	18635	16791	16768	12984	12367	18459	16552	18744	14521	13006	18397.1	17403.4	17999	14179.2	12801.9	1	0.901046	0.899812	0.696753	0.663644	0.987233	0.933907	0.965871	0.760889	0.686979	-0.0127666	0.0328605	0.0660587	0.0641357	0.0233357	0.173624	NO
Q9H777	Zinc phosphodiesterase ELAC protein 1	ELAC1	5209.2	4293.2	4612.1	6254.1	3159.6	5840.5	4688.9	4222	6659.3	3174	5820.91	4930.07	4054.19	6502.54	3124.18	1	0.824157	0.885376	1.20059	0.606542	1.11743	0.946417	0.778276	1.24828	0.599743	0.117429	0.12226	-0.1071	0.0476919	-0.00679916	0.173481	NO
O75157	TSC22 domain family protein 2	TSC22D2	166900	141300	138330	107160	95663	173070	138930	150880	115590	103470	172490	146076	144883	112869	101846	1	0.846615	0.82882	0.642061	0.573176	1.03349	0.87523	0.868084	0.676267	0.610221	0.0334905	0.0286153	0.0392639	0.0342058	0.0370459	0.172621	NO
P39748	Flap endonuclease 1	FEN1	596280	550860	534370	423710	431890	620840	543540	540430	473090	476350	618758	571497	518950	461953	468873	1	0.923828	0.896173	0.710589	0.724307	1.0377	0.958437	0.870313	0.774725	0.786331	0.0376969	0.0346097	-0.0258601	0.0641364	0.0620235	0.172606	NO
O15169	Axin-1	AXIN1	31045	28391	27677	25142	22802	37396	26567	27876	26060	23359	37270.6	27933.5	26768	25446.5	22992.4	1	0.914511	0.891512	0.809857	0.734482	1.20053	0.899774	0.862234	0.819666	0.740614	0.200534	-0.0147374	-0.0292787	0.00980947	0.00613187	0.172459	NO
Q765P7	MTSS1-like protein	MTSS1L	135660	129600	126960	106570	100770	133280	129580	135230	110880	117550	132833	136245	129855	108270	115705	1	0.95533	0.935869	0.785567	0.742813	0.979161	1.00431	0.95721	0.798097	0.852904	-0.0208387	0.0489825	0.0213413	0.0125301	0.110091	0.172106	NO
Q8N9N7	Leucine-rich repeat-containing protein 57	LRRC57	176780	158620	163500	124590	120960	167310	163650	174500	142040	131850	166749	172067	167564	138696	129781	1	0.897273	0.924878	0.704774	0.68424	0.943257	0.973342	0.947869	0.78457	0.734136	-0.0567435	0.0760684	0.022991	0.0797958	0.0498955	0.172007	NO
Q9NQ48	Leucine zipper transcription factor-like protein 1	LZTFL1	336550	318750	300360	231610	220320	342450	316060	316530	265340	232460	341302	332317	303949	259094	228811	1	0.94711	0.892468	0.688189	0.654643	1.01412	0.987421	0.903132	0.769852	0.679873	0.0141183	0.0403108	0.0106648	0.0816633	0.0252306	0.171988	NO
Q6IQ49	Protein SDE2 homolog	SDE2	37393	34675	36284	26978	28283	40913	34296	35486	30752	29543	40775.8	36060	34075.6	30028.1	29079.3	1	0.927313	0.970342	0.721472	0.756372	1.09047	0.964352	0.911282	0.80304	0.777667	0.0904658	0.0370396	-0.0590598	0.0815683	0.0212955	0.171309	NO
Q5JV73	FERM and PDZ domain-containing protein 3	FRMPD3	49254	37543	39333	41764	33324	61681	33414	43279	42300	30653	61474.1	35132.7	41558.8	41304.2	30171.9	1	0.762233	0.798575	0.847931	0.676574	1.2481	0.713295	0.843766	0.838597	0.612577	0.248105	-0.0489371	0.045191	-0.00933452	-0.0639973	0.171027	NO
Q9C010	cAMP-dependent protein kinase inhibitor beta	PKIB	12966	11151	12493	10442	9780.7	14227	9833	12290	12558	10633	14179.3	10338.8	11801.5	12262.4	10466.1	1	0.860019	0.96352	0.805337	0.754334	1.09357	0.797375	0.91019	0.945733	0.807196	0.0935745	-0.0626437	-0.05333	0.140396	0.0528619	0.170859	NO
Q04837	Single-stranded DNA-binding protein, mitochondrial	SSBP1	278730	243870	249240	175590	189260	267820	246700	248380	210390	217360	266922	259389	238508	205437	213948	1	0.874933	0.894199	0.629964	0.679008	0.957636	0.93061	0.855695	0.737048	0.767583	-0.0423643	0.0556777	-0.0385035	0.107083	0.0885745	0.170468	NO
P16403	Histone H1.2	HIST1H1C	122570	123740	147180	118350	168220	120280	116940	127280	150020	192430	119877	122955	122221	146488	189410	1	1.00955	1.20078	0.965571	1.37244	0.978026	1.00314	0.997154	1.19514	1.54532	-0.0219743	-0.00640591	-0.203629	0.229571	0.172878	0.170439	NO
P34949	Mannose-6-phosphate isomerase	MPI	359200	314930	322470	250750	231810	376960	310070	332830	288060	241560	375696	326018	319601	281279	237769	1	0.876754	0.897745	0.698079	0.645351	1.04592	0.907624	0.889759	0.783071	0.661939	0.0459237	0.03087	-0.00798614	0.0849914	0.0165884	0.170387	NO
Q12974	Protein tyrosine phosphatase type IVA 2	PTP4A2	184310	179170	165590	129670	140050	204200	174110	156850	147010	151790	203515	183065	150616	143549	149408	1	0.972112	0.898432	0.703543	0.759861	1.1042	0.993247	0.817188	0.778847	0.810632	0.1042	0.0211349	-0.0812443	0.0753042	0.0507707	0.170166	NO
P11021	78 kDa glucose-regulated protein	HSPA5	2265800	2142600	2166500	1762900	2014500	2511900	2100300	2023300	2006400	2157000	2.50348e+06	2.20833e+06	1.94288e+06	1.95917e+06	2.12314e+06	1	0.945626	0.956174	0.778047	0.88909	1.1049	0.974636	0.857482	0.86467	0.93704	0.104897	0.0290093	-0.0986927	0.0866221	0.0479497	0.169785	NO
Q9H0S4	Probable ATP-dependent RNA helicase DDX47	DDX47	35030	28768	25779	22602	20777	37132	29236	30394	23576	19249	37007.5	30739.8	29186	23021	18946.9	1	0.821239	0.735912	0.645218	0.59312	1.05645	0.877527	0.833171	0.65718	0.540876	0.0564508	0.0562877	0.0972585	0.0119614	-0.0522446	0.169714	NO
O76041	Nebulette	NEBL	49750	43161	43676	36583	34396	52989	46426	43835	40328	33432	52811.3	48813.9	42092.7	39378.7	32907.3	1	0.867558	0.87791	0.735337	0.691377	1.06153	0.981184	0.846085	0.791531	0.661452	0.0615335	0.113627	-0.0318243	0.0561942	-0.0299244	0.169606	NO
Q96HY6	DDRGK domain-containing protein 1	DDRGK1	36592	34954	24728	15993	14625	36118	34938	27890	18070	16191	35996.9	36735	26781.5	17644.6	15936.9	1	0.955236	0.675776	0.437063	0.399678	0.983736	1.00391	0.731895	0.482199	0.435529	-0.0162639	0.048673	0.0561185	0.0451362	0.0358513	0.169515	NO
Q14653	Interferon regulatory factor 3	IRF3	240560	220800	220530	169310	167060	252670	212520	218630	197250	184000	251823	223451	209940	192607	181112	1	0.917858	0.916736	0.703816	0.694463	1.04682	0.928878	0.872715	0.800659	0.752877	0.0468183	0.0110201	-0.0440208	0.0968434	0.0584137	0.169075	NO
Q9P1U1	Actin-related protein 3B	ACTR3B	51505	47269	48686	44592	38282	61959	46618	47444	43852	40531	61751.2	49015.8	45558.3	42819.7	39894.8	1	0.917756	0.945267	0.86578	0.743268	1.19894	0.951671	0.884541	0.83137	0.774582	0.198936	0.0339152	-0.0607262	-0.0344102	0.0313142	0.169029	NO
A6NKD9	Coiled-coil domain-containing protein 85C	CCDC85C	51615	42642	35406	25222	21660	61292	41073	36060	26487	20821	61086.4	43185.6	34626.8	25863.5	20494.2	1	0.826155	0.685963	0.488656	0.419645	1.1835	0.836687	0.670866	0.501085	0.397059	0.183502	0.0105317	-0.0150971	0.0124282	-0.0225865	0.168778	NO
P06733	Alpha-enolase	ENO1	7681600	6946800	7000200	5708400	6097100	8563300	6331300	7032900	6415700	6624300	8.53458e+06	6.65695e+06	6.75337e+06	6.26467e+06	6.52033e+06	1	0.904343	0.911295	0.743126	0.793728	1.11104	0.86661	0.879162	0.815543	0.848824	0.111042	-0.0377328	-0.0321325	0.0724161	0.0550962	0.168689	NO
P52907	F-actin-capping protein subunit alpha-1	CAPZA1	884860	761210	800610	634570	661880	948500	738430	830190	735800	665090	945319	776411	797193	718479	654651	1	0.86026	0.904787	0.717142	0.748005	1.06833	0.87744	0.900926	0.811969	0.739836	0.0683261	0.0171793	-0.00386121	0.0948273	-0.00816973	0.168302	NO
P22234	Multifunctional protein ADE2;Phosphoribosylaminoimidazole-succinocarboxamide synthase;Phosphoribosylaminoimidazole carboxylase	PAICS	1845000	1696000	1675300	1314700	1548300	2050400	1627300	1596800	1515500	1648000	2.04352e+06	1.711e+06	1.53333e+06	1.47982e+06	1.62213e+06	1	0.919241	0.908022	0.712575	0.839187	1.1076	0.927372	0.831075	0.802073	0.879205	0.107601	0.00813031	-0.0769465	0.0894983	0.0400181	0.168301	NO
Q13049	E3 ubiquitin-protein ligase TRIM32	TRIM32	92982	77630	69658	53429	44109	95949	75888	79624	56863	46780	95627.2	79791.3	76459.3	55524.4	46045.8	1	0.834893	0.749156	0.574617	0.474382	1.02845	0.858137	0.822302	0.597152	0.495211	0.0284487	0.0232444	0.0731461	0.0225357	0.0208293	0.168204	NO
P08670	Vimentin	VIM	3080600	2882100	2830300	1929100	1232500	3537900	2831700	2875200	2095700	1180100	3.52603e+06	2.97735e+06	2.76092e+06	2.04637e+06	1.16158e+06	1	0.935565	0.91875	0.626209	0.400084	1.14459	0.966483	0.896229	0.664275	0.377062	0.144594	0.030919	-0.0225207	0.038066	-0.0230223	0.168036	NO
P62312	U6 snRNA-associated Sm-like protein LSm6	LSM6	330010	307780	304550	239810	255050	320610	312830	296450	278980	291480	319535	328920	284667	272413	286905	1	0.932638	0.922851	0.726675	0.772855	0.968258	0.996698	0.862602	0.825468	0.869383	-0.0317422	0.0640601	-0.0602487	0.098793	0.0965274	0.16739	NO
P82663	28S ribosomal protein S25, mitochondrial	MRPS25	44802	48081	31979	31429	32455	60496	43458	31180	34913	26618	60293.1	45693.3	29940.7	34091.1	26200.2	1	1.07319	0.713785	0.701509	0.72441	1.34577	1.01989	0.66829	0.760929	0.5848	0.345768	-0.0532952	-0.0454952	0.0594199	-0.13961	0.166788	NO
Q14247	Src substrate cortactin	CTTN	1228800	1149500	1121700	886150	902130	1315500	1165100	1109400	930620	998130	1.31109e+06	1.22503e+06	1.06531e+06	908713	982464	1	0.935465	0.912842	0.721151	0.734155	1.06697	0.99693	0.866948	0.739512	0.799531	0.0669663	0.0614641	-0.0458936	0.0183616	0.0653757	0.166274	NO
O94817	Ubiquitin-like protein ATG12	ATG12	100560	94251	87857	66587	64359	101850	91371	94636	76691	68012	101508	96070.7	90874.6	74885.7	66944.5	1	0.937261	0.873677	0.662162	0.640006	1.00943	0.955357	0.903685	0.744686	0.665717	0.00943143	0.0180955	0.030008	0.0825244	0.025711	0.16577	NO
Q99439	Calponin-2	CNN2	473260	417250	421280	331440	340540	459080	417530	429210	392380	376200	457540	439006	412151	383143	370295	1	0.881651	0.890166	0.700334	0.719562	0.966784	0.927621	0.870876	0.809583	0.782435	-0.0332156	0.0459699	-0.0192903	0.109249	0.062873	0.165586	NO
Q9Y496	Kinesin-like protein KIF3A	KIF3A	93058	80691	50564	35740	24428	97554	87271	59912	35643	18845	97226.8	91759.8	57530.7	34803.9	18549.2	1	0.867104	0.54336	0.384062	0.262503	1.0448	0.98605	0.618225	0.374003	0.19933	0.0447982	0.118945	0.0748645	-0.0100588	-0.0631734	0.165376	NO
Q15554	Telomeric repeat-binding factor 2	TERF2	63206	57787	50783	38820	37466	65201	55448	54471	41696	42884	64982.3	58300	52306	40714.5	42210.9	1	0.914264	0.803452	0.614182	0.59276	1.0281	0.92238	0.827548	0.644155	0.667831	0.0281039	0.00811595	0.0240958	0.0299727	0.0750705	0.165359	NO
Q9H999	Pantothenate kinase 3	PANK3	8354.8	7877.6	7809.8	7128.1	6891.3	9512.7	8240.7	7862.4	7269.2	6755.5	9480.8	8664.56	7549.9	7098.08	6649.47	1	0.942883	0.934768	0.853174	0.824831	1.13477	1.03708	0.90366	0.849581	0.795886	0.134772	0.0941928	-0.0311076	-0.0035932	-0.0289453	0.165319	NO
Q9NSA3	Beta-catenin-interacting protein 1	CTNNBIP1	53866	50802	43223	38715	35564	57570	50947	47171	38258	38073	57376.9	53567.5	45296.1	37357.4	37475.4	1	0.943118	0.802417	0.718728	0.660231	1.06518	0.994458	0.840904	0.693524	0.695716	0.0651789	0.0513397	0.0384871	-0.0252035	0.0354847	0.165287	NO
Q16774	Guanylate kinase	GUK1	301110	267130	207020	106360	85206	295940	269440	241180	124060	86898	294948	283299	231594	121140	85534.1	1	0.887151	0.687523	0.353226	0.282973	0.979534	0.940848	0.769134	0.40231	0.284063	-0.0204659	0.0536969	0.0816117	0.0490836	0.00108955	0.165016	NO
Q9P219	Protein Daple	CCDC88C	144250	135390	101550	68599	61211	154810	136220	117150	65582	61712	154291	143226	112494	64038.2	60743.4	1	0.938579	0.703986	0.475556	0.42434	1.06961	0.992905	0.779853	0.443939	0.421098	0.069607	0.0543258	0.0758667	-0.0316176	-0.00324169	0.16494	NO
Q9H2C0	Gigaxonin	GAN	464640	432930	423630	304470	250000	494340	419840	437310	338710	271710	492682	441435	419929	330737	267445	1	0.931754	0.911738	0.655282	0.538051	1.06035	0.950057	0.903772	0.711813	0.575597	0.0603524	0.0183035	-0.00796589	0.0565311	0.0375459	0.164767	NO
Q92667	A-kinase anchor protein 1, mitochondrial	AKAP1	204380	186410	170620	137850	124640	213290	182710	184680	140700	140350	212575	192108	177340	137388	138147	1	0.912076	0.834817	0.674479	0.609844	1.0401	0.939954	0.867696	0.672218	0.675933	0.0400953	0.0278781	0.0328786	-0.00226121	0.0660882	0.164679	NO
Q9Y294	Histone chaperone ASF1A	ASF1A	139430	120680	124820	97292	90696	145870	124770	132170	108000	88273	145381	131188	126917	105458	86887.5	1	0.865524	0.895216	0.697784	0.650477	1.04268	0.940885	0.910255	0.756348	0.623162	0.0426794	0.0753609	0.0150383	0.0585644	-0.0273148	0.164328	NO
P04083	Annexin A1	ANXA1	2709600	2507200	2483800	2021600	2197100	2870400	2477800	2435600	2274200	2375200	2.86077e+06	2.60525e+06	2.33879e+06	2.22066e+06	2.33792e+06	1	0.925303	0.916667	0.746088	0.810858	1.05579	0.961487	0.863151	0.819554	0.862828	0.0557918	0.0361847	-0.0535153	0.0734663	0.0519706	0.163898	NO
P50897	Palmitoyl-protein thioesterase 1	PPT1	431610	395950	386960	295910	345290	447180	388010	376880	358730	366330	445680	407967	361901	350285	360580	1	0.917379	0.89655	0.685596	0.800005	1.0326	0.945222	0.83849	0.811578	0.835431	0.0325995	0.0278431	-0.0580603	0.125983	0.0354259	0.163791	NO
Q96DC8	Enoyl-CoA hydratase domain-containing protein 3, mitochondrial	ECHDC3	43590	38162	37942	32708	35903	51657	35443	38628	36689	34310	51483.8	37266	37092.7	35825.3	33771.5	1	0.875476	0.870429	0.750356	0.823652	1.18109	0.854921	0.850945	0.82187	0.774753	0.181091	-0.0205548	-0.0194839	0.0715146	-0.0488993	0.163668	NO
P48454	Serine/threonine-protein phosphatase 2B catalytic subunit gamma isoform	PPP3CC	113250	95382	101930	89934	79659	132970	89943	102280	95973	80933	132524	94569.2	98214.8	93713.7	79662.7	1	0.842225	0.900044	0.794119	0.703391	1.17019	0.835048	0.867239	0.827494	0.703423	0.17019	-0.00717676	-0.0328054	0.0333753	3.26588e-05	0.163616	NO
Q9NRD5	PRKCA-binding protein	PICK1	18886	17859	15853	9289.3	7161.2	23990	16096	14929	10129	7188.6	23909.5	16923.9	14335.6	9890.56	7075.77	1	0.945621	0.839405	0.491862	0.37918	1.26599	0.896108	0.759061	0.523698	0.374657	0.265993	-0.0495129	-0.0803434	0.0318362	-0.00452347	0.163449	NO
Q13615	Myotubularin-related protein 3	MTMR3	21605	19198	16800	16003	13146	22351	18258	21072	15220	13926	22276	19197.1	20234.5	14861.7	13707.4	1	0.888591	0.777598	0.740708	0.60847	1.03106	0.888549	0.936564	0.687883	0.634456	0.0310595	-4.15142e-05	0.158967	-0.0528251	0.0259857	0.163145	NO
Q9Y651	Transcription factor SOX-21	SOX21	24873	23738	22098	19187	18539	24289	23837	23362	20170	21426	24207.5	25063.1	22433.5	19695.2	21089.7	1	0.954368	0.888433	0.771399	0.745346	0.973246	1.00764	0.90192	0.79183	0.847895	-0.0267542	0.053273	0.0134868	0.0204313	0.102549	0.162986	NO
P52735	Guanine nucleotide exchange factor VAV2	VAV2	63303	39640	52179	52844	51763	106120	32445	41953	63149	28667	105764	34113.8	40285.5	61662.4	28217.1	1	0.626195	0.824274	0.834779	0.817702	1.67076	0.538897	0.636392	0.974084	0.445746	0.67076	-0.0872974	-0.187881	0.139305	-0.371956	0.16293	NO
O95208	Epsin-2	EPN2	6419.6	6401	6456.5	4635	4390	6206.3	6069	6191.4	5216.2	5832.9	6185.49	6381.16	5945.32	5093.41	5741.35	1	0.997103	1.00575	0.722008	0.683843	0.963531	0.994012	0.92612	0.793415	0.894347	-0.0364687	-0.00309054	-0.0796284	0.0714076	0.210504	0.162723	NO
P26885	Peptidyl-prolyl cis-trans isomerase FKBP2	FKBP2	269620	234560	228220	173940	175570	277140	223310	233230	210920	187750	276211	234796	223960	205955	184803	1	0.869965	0.846451	0.64513	0.651176	1.02444	0.87084	0.830651	0.763871	0.685421	0.0244439	0.00087525	-0.0157998	0.118741	0.034245	0.162505	NO
Q8NG31	Protein CASC5	CASC5	470690	414630	357810	250460	222270	483800	410300	391450	282050	230720	482177	431404	375891	275410	227099	1	0.880898	0.760182	0.532112	0.472222	1.02441	0.916535	0.798597	0.585121	0.48248	0.0244056	0.0356367	0.0384148	0.0530081	0.0102587	0.161724	NO
O14773	Tripeptidyl-peptidase 1	TPP1	215350	192220	193740	155640	147110	241110	180840	191590	170900	160100	240301	190142	183975	166877	157587	1	0.892593	0.899652	0.72273	0.683121	1.11586	0.882942	0.854307	0.77491	0.731772	0.115864	-0.00965157	-0.0453444	0.0521799	0.0486516	0.1617	NO
P62306	Small nuclear ribonucleoprotein F	SNRPF	63642	50626	51073	45391	43676	74284	48678	57034	46347	40083	74034.9	51181.8	54767.1	45256	39453.9	1	0.795481	0.802505	0.713224	0.686276	1.1633	0.804214	0.86055	0.711102	0.619934	0.163302	0.00873261	0.0580455	-0.00212173	-0.0663419	0.161617	NO
Q8NC56	LEM domain-containing protein 2	LEMD2	65448	54863	56853	49771	41770	71728	53248	60283	50728	45093	71487.4	55986.8	57887	49533.8	44385.2	1	0.838269	0.868674	0.760466	0.638217	1.09228	0.85544	0.884473	0.756843	0.678176	0.0922785	0.0171712	0.0157988	-0.00362367	0.0399589	0.161584	NO
P31943	Heterogeneous nuclear ribonucleoprotein H;Heterogeneous nuclear ribonucleoprotein H, N-terminally processed	HNRNPH1	848890	773270	750870	576580	526300	942470	780620	753140	627790	524940	939309	820771	723206	613012	516701	1	0.910919	0.884532	0.679216	0.619986	1.10651	0.966876	0.851943	0.722133	0.608678	0.106515	0.055957	-0.0325887	0.0429167	-0.0113081	0.161492	NO
Q8N142	Adenylosuccinate synthetase isozyme 1	ADSSL1	152890	154830	145120	109930	103980	152760	152520	155200	124390	110050	152248	160365	149031	121462	108323	1	1.01269	0.949179	0.719014	0.680097	0.995799	1.04889	0.974763	0.794439	0.708501	-0.00420115	0.0362018	0.0255834	0.0754255	0.028404	0.161413	NO
A0AV96	RNA-binding protein 47	RBM47	10540	9578.5	8416.7	5954	5469.1	11526	9383.7	9536.1	6490.8	4887.2	11487.3	9866.35	9157.08	6338	4810.49	1	0.908776	0.798548	0.564896	0.51889	1.08988	0.936087	0.868793	0.601329	0.456403	0.0898809	0.0273104	0.0702447	0.036433	-0.0624865	0.161383	NO
Q9NUX5	Protection of telomeres protein 1	POT1	69257	67383	55133	40198	33976	74441	61865	62233	42761	36938	74191.3	65047	59759.5	41754.4	36358.2	1	0.972941	0.796064	0.580418	0.490579	1.07125	0.939212	0.862866	0.60289	0.524976	0.0712469	-0.0337289	0.0668018	0.0224726	0.034397	0.161189	NO
Q8N3X1	Formin-binding protein 4	FNBP4	279830	271270	254370	236100	204160	298720	256760	281030	240770	221660	297718	269966	269860	235102	218181	1	0.96941	0.909016	0.843727	0.729586	1.06393	0.964752	0.964372	0.840161	0.779691	0.0639252	-0.00465822	0.0553558	-0.00356589	0.050105	0.161162	NO
P09651	Heterogeneous nuclear ribonucleoprotein A1;Heterogeneous nuclear ribonucleoprotein A1, N-terminally processed;Heterogeneous nuclear ribonucleoprotein A1-like 2	HNRNPA1;HNRNPA1L2	965430	901730	866820	589550	419960	1146100	875190	840270	660360	390990	1.14226e+06	920206	806873	644815	384853	1	0.934019	0.897859	0.610661	0.434998	1.18316	0.953156	0.835765	0.667904	0.398634	0.183158	0.0191371	-0.0620939	0.0572437	-0.036364	0.161081	NO
Q9P0J7	E3 ubiquitin-protein ligase KCMF1	KCMF1	68396	62288	50345	35065	34061	69859	64131	52144	41818	33739	69624.7	67429.6	50071.5	40833.6	33209.4	1	0.910697	0.736081	0.512676	0.497997	1.01796	0.98587	0.732082	0.597017	0.485547	0.0179647	0.0751738	-0.0039989	0.084341	-0.0124504	0.16103	NO
P31937	3-hydroxyisobutyrate dehydrogenase, mitochondrial	HIBADH	268670	234820	240880	179450	177740	276390	229770	245300	204530	195560	275463	241588	235550	199715	192491	1	0.874009	0.896565	0.66792	0.661555	1.02528	0.899201	0.876727	0.743348	0.716457	0.0252841	0.0251917	-0.0198372	0.0754281	0.0549021	0.160969	NO
P84022	Mothers against decapentaplegic homolog 3	SMAD3	140100	124910	88394	50051	45387	134340	115280	100180	76351	46235	133889	121209	96198.3	74553.7	45509.3	1	0.891577	0.630935	0.357252	0.323961	0.955671	0.865164	0.68664	0.532146	0.324834	-0.0443293	-0.0264137	0.0557049	0.174894	0.000873009	0.160729	NO
Q07960	Rho GTPase-activating protein 1	ARHGAP1	311480	273490	218500	123660	76779	325400	253740	248050	147170	82211	324309	266791	238191	143706	80920.6	1	0.878034	0.70149	0.397008	0.246497	1.04119	0.856527	0.764707	0.461364	0.259794	0.0411863	-0.0215065	0.0632177	0.0643558	0.0132966	0.16055	NO
Q9Y2Q3	Glutathione S-transferase kappa 1	GSTK1	388190	321080	329450	251870	250250	393960	317270	350680	281820	269140	392639	333589	336742	275186	264916	1	0.827121	0.848682	0.648832	0.644659	1.01146	0.859344	0.867467	0.708895	0.682438	0.0114603	0.0322235	0.0187844	0.0600629	0.0377796	0.160311	NO
O94874	E3 UFM1-protein ligase 1	UFL1	114220	99063	86711	59592	52008	128540	101170	93270	60166	47849	128109	106374	89562.9	58749.7	47098	1	0.8673	0.759158	0.52173	0.455332	1.1216	0.931305	0.784126	0.514355	0.412344	0.121598	0.0640054	0.0249685	-0.00737469	-0.0429874	0.16021	NO
Q02790	Peptidyl-prolyl cis-trans isomerase FKBP4;Peptidyl-prolyl cis-trans isomerase FKBP4, N-terminally processed	FKBP4	1915000	1754100	1755200	1322700	1477700	2045700	1684400	1711300	1574300	1565100	2.03884e+06	1.77104e+06	1.64328e+06	1.53724e+06	1.54053e+06	1	0.915979	0.916554	0.690705	0.771645	1.06467	0.924824	0.858111	0.802736	0.804457	0.064668	0.00884458	-0.0584424	0.112031	0.0328118	0.159914	NO
P46108	Adapter molecule crk	CRK	442720	386410	395590	339510	334930	485390	373880	404530	375230	343560	483762	393111	388452	366397	338168	1	0.872809	0.893544	0.766873	0.756528	1.0927	0.887944	0.87742	0.827604	0.763841	0.0927045	0.015135	-0.016124	0.0607312	0.00731293	0.15976	NO
P29353	SHC-transforming protein 1	SHC1	362830	317650	323000	245380	241390	381260	309480	339930	279250	247560	379981	325398	326419	272676	243674	1	0.875479	0.890224	0.676295	0.665298	1.04727	0.896834	0.899648	0.751526	0.671594	0.0472711	0.0213548	0.00942365	0.0752317	0.00629597	0.159577	NO
Q9HCK5	Protein argonaute-4	AGO4	12427	10499	10956	8825.6	8223.1	13551	10118	11708	10132	7754	13505.6	10638.4	11242.7	9893.49	7632.3	1	0.844854	0.881629	0.710196	0.661712	1.08679	0.856073	0.904696	0.796128	0.61417	0.0867912	0.0112192	0.0230671	0.0859329	-0.047542	0.159468	NO
Q9H2P9	Diphthine synthase	DPH5	293900	275170	253060	198900	184150	309630	262470	271640	225350	189530	308592	275970	260843	220045	186555	1	0.936271	0.861041	0.676761	0.626574	1.04999	0.938993	0.887524	0.748708	0.634757	0.0499884	0.00272265	0.0264833	0.0719468	0.00818371	0.159325	NO
O00221	NF-kappa-B inhibitor epsilon	NFKBIE	73458	64135	59805	40210	27358	85812	58630	61402	41856	30131	85524.2	61645.6	58961.5	40870.7	29658.1	1	0.873084	0.814139	0.547388	0.372431	1.16426	0.839196	0.802656	0.556382	0.403742	0.16426	-0.0338882	-0.0114824	0.00899411	0.0313114	0.159195	NO
P13796	Plastin-2	LCP1	3539300	3196400	3228500	2496200	2806400	3703400	3120900	3205000	2893800	3001200	3.69098e+06	3.28142e+06	3.07761e+06	2.82568e+06	2.95409e+06	1	0.903116	0.912186	0.705281	0.792925	1.04286	0.927139	0.869555	0.798372	0.834655	0.0428559	0.0240228	-0.0426315	0.0930914	0.0417297	0.159068	NO
Q15788	Nuclear receptor coactivator 1	NCOA1	264910	247490	239670	205310	183390	279250	241500	257310	213230	198490	278313	253922	247083	208210	195375	1	0.934242	0.904722	0.775018	0.692273	1.0506	0.95852	0.932705	0.785967	0.737513	0.0505963	0.0242784	0.027983	0.0109489	0.0452401	0.159047	NO
Q9UFW8	CGG triplet repeat-binding protein 1	CGGBP1	134780	125160	114150	84557	79582	139800	121320	120300	97630	83225	139331	127560	115519	95331.7	81918.7	1	0.928624	0.846936	0.627371	0.590459	1.03377	0.946432	0.85709	0.707314	0.607796	0.0337673	0.0178076	0.0101541	0.0799432	0.0173373	0.15901	NO
O00468	Agrin;Agrin N-terminal 110 kDa subunit;Agrin C-terminal 110 kDa subunit;Agrin C-terminal 90 kDa fragment;Agrin C-terminal 22 kDa fragment	AGRN	19574	18738	17737	15568	13098	19839	17312	21561	14791	14935	19772.5	18202.4	20704	14442.8	14700.6	1	0.95729	0.906151	0.795341	0.669153	1.01014	0.92993	1.05773	0.737857	0.751026	0.0101392	-0.0273605	0.151581	-0.0574838	0.0818731	0.158749	NO
Q8N0X7	Spartin	SPG20	327480	306860	303450	215880	218540	328240	320880	281540	245290	253710	327139	337385	270350	239516	249728	1	0.937034	0.926621	0.659216	0.667338	0.998959	1.03024	0.825546	0.73139	0.762574	-0.00104075	0.0932103	-0.101075	0.0721746	0.0952359	0.158505	NO
Q03013	Glutathione S-transferase Mu 4;Glutathione S-transferase Mu 1	GSTM4;GSTM1	129460	117040	117430	92086	89607	134070	111380	119550	103940	100700	133620	117109	114798	101493	99119.4	1	0.904063	0.907076	0.711309	0.69216	1.03214	0.904595	0.886748	0.783973	0.765638	0.0321363	0.000531807	-0.0203277	0.0726649	0.0734778	0.158483	NO
O14933	Ubiquitin/ISG15-conjugating enzyme E2 L6	UBE2L6	47292	44353	47016	37825	42069	53721	46501	42863	42682	41430	53540.8	48892.8	41159.4	41677.2	40779.7	1	0.937854	0.994164	0.799818	0.889558	1.13213	1.03385	0.870324	0.881275	0.862297	0.132133	0.0959948	-0.12384	0.0814566	-0.027262	0.158483	NO
Q9UJZ1	Stomatin-like protein 2, mitochondrial	STOML2	32229	30089	26830	20162	17538	32669	30295	29473	21842	18199	32559.4	31853.2	28301.6	21327.8	17913.4	1	0.9336	0.83248	0.625586	0.544168	1.01025	0.988341	0.87814	0.661759	0.555815	0.0102528	0.0547404	0.0456598	0.0361733	0.0116465	0.158473	NO
Q9P2N6	KAT8 regulatory NSL complex subunit 3	KANSL3	97293	90399	85442	64315	61807	112010	80564	81292	76909	66206	111634	84707.8	78061	75098.5	65166.8	1	0.929142	0.878193	0.661044	0.635267	1.1474	0.870647	0.802329	0.77188	0.6698	0.147404	-0.0584952	-0.0758639	0.110836	0.0345333	0.158413	NO
P50402	Emerin	EMD	311370	290550	270360	217870	235880	339660	290090	257810	256460	237520	338521	305011	247563	250423	233792	1	0.933134	0.868292	0.699714	0.757555	1.0872	0.979577	0.795077	0.804261	0.750849	0.0871981	0.0464426	-0.0732148	0.104547	-0.006706	0.158267	NO
P53999	Activated RNA polymerase II transcriptional coactivator p15	SUB1	741040	715190	778540	614470	631600	771600	712340	773460	687990	676200	769012	748979	742718	671794	665587	1	0.965117	1.0506	0.8292	0.852316	1.03775	1.01071	1.00226	0.906556	0.898179	0.0377473	0.0455972	-0.04834	0.0773567	0.0458633	0.158225	NO
Q5BKU9	Oxidoreductase-like domain-containing protein 1	OXLD1	37290	27468	30684	26824	24497	40603	27580	31985	27236	26300	40466.8	28998.6	30713.7	26594.9	25887.2	1	0.736605	0.822848	0.719335	0.656932	1.08519	0.77765	0.823645	0.71319	0.694213	0.0851925	0.0410454	0.000797213	-0.00614504	0.0372808	0.158171	NO
Q15438	Cytohesin-1;Cytohesin-3	CYTH1;CYTH3	105500	97611	95405	77818	82183	123030	96547	89100	87545	81301	122617	101513	85558.6	85484.1	80024.9	1	0.925223	0.904313	0.737611	0.778986	1.16225	0.962208	0.810982	0.810276	0.75853	0.16225	0.0369849	-0.0933304	0.0726649	-0.0204557	0.158114	NO
Q86XK3	Swi5-dependent recombination DNA repair protein 1 homolog	SFR1	10755	8453.7	7914.7	6713.9	6150.2	9935.3	8623.7	9331.9	7070.4	6962	9901.98	9067.26	8961	6903.96	6852.73	1	0.786025	0.735909	0.624258	0.571846	0.920686	0.843074	0.833193	0.64193	0.637167	-0.0793138	0.0570489	0.0972846	0.0176717	0.0653209	0.158012	NO
Q15527	Surfeit locus protein 2	SURF2	51482	44958	37689	32871	25570	61168	41996	39202	32116	26998	60962.9	44156.1	37643.9	31360	26574.2	1	0.873276	0.732081	0.638495	0.496678	1.18416	0.857699	0.731205	0.609144	0.516185	0.184159	-0.0155769	-0.000876382	-0.0293506	0.0195068	0.157862	NO
Q96JC9	ELL-associated factor 1;ELL-associated factor 2	EAF1;EAF2	41189	36419	38385	29560	29884	41899	36952	38450	33766	31933	41758.5	38852.6	36921.8	32971.1	31431.8	1	0.884192	0.931924	0.717667	0.725534	1.01383	0.943277	0.896399	0.800484	0.763111	0.0138261	0.0590845	-0.0355248	0.0828166	0.0375777	0.15778	NO
O43665	Regulator of G-protein signaling 10	RGS10	253780	215850	212420	185320	182400	308000	208080	205040	193650	180910	306967	218783	196891	189091	178070	1	0.85054	0.837024	0.730239	0.718733	1.20958	0.862096	0.775831	0.7451	0.701673	0.209579	0.0115558	-0.0611927	0.0148608	-0.0170601	0.157743	NO
P15289	Arylsulfatase A;Arylsulfatase A component B;Arylsulfatase A component C	ARSA	80286	70650	69403	54663	56275	77341	68894	70456	61520	67750	77081.6	72437.6	67655.7	60071.8	66686.6	1	0.879979	0.864447	0.680853	0.700932	0.960088	0.902244	0.842683	0.748222	0.830613	-0.0399121	0.0222651	-0.0217639	0.067369	0.129682	0.15764	NO
Q9UFN0	Protein NipSnap homolog 3A	NIPSNAP3A	119190	116700	112400	90413	95296	107650	120600	111800	98420	117070	107289	126803	107356	96103.1	115233	1	0.979109	0.943032	0.758562	0.79953	0.900151	1.06387	0.900717	0.806302	0.966797	-0.0998492	0.0847645	-0.0423155	0.0477401	0.167267	0.157606	NO
Q8NG68	Tubulin--tyrosine ligase	TTL	98629	86971	88042	78080	67512	105560	88153	92956	79469	71127	105206	92687.2	89261.4	77598.3	70010.6	1	0.881799	0.892658	0.791654	0.684505	1.06668	0.939756	0.905022	0.786769	0.709838	0.0666841	0.0579562	0.0123633	-0.00488435	0.0253334	0.157453	NO
Q92997	Segment polarity protein dishevelled homolog DVL-3	DVL3	17306	14913	12444	10722	9772.4	17387	15746	16154	10348	8513.3	17328.7	16555.9	15511.9	10104.4	8379.68	1	0.861724	0.719057	0.619554	0.564683	1.00131	0.956657	0.896333	0.583867	0.484206	0.00131105	0.0949323	0.177276	-0.0356869	-0.0804763	0.157357	NO
Q9Y2I8	WD repeat-containing protein 37	WDR37	30950	26350	18619	16551	13386	34302	24846	23131	15824	12950	34187	26124	22211.6	15451.5	12746.7	1	0.851373	0.601583	0.534766	0.432504	1.10459	0.84407	0.717662	0.499241	0.411849	0.104587	-0.00730346	0.116079	-0.0355252	-0.0206546	0.157182	NO
P55327	Tumor protein D52	TPD52	131650	120120	122420	102040	100370	128960	124590	124770	105830	116440	128528	130998	119811	103339	114612	1	0.912419	0.92989	0.775085	0.7624	0.976282	0.99505	0.910071	0.78495	0.870584	-0.0237182	0.0826305	-0.0198184	0.00986487	0.108184	0.157143	NO
P20933	N(4)-(beta-N-acetylglucosaminyl)-L-asparaginase;Glycosylasparaginase alpha chain;Glycosylasparaginase beta chain	AGA	218600	194410	182500	151270	153440	241820	185760	174710	168000	169010	241009	195315	167766	164045	166357	1	0.889341	0.834858	0.691995	0.701921	1.10251	0.893479	0.767457	0.750435	0.761012	0.102511	0.00413813	-0.0674017	0.058441	0.0590909	0.15678	NO
Q96GS4	Uncharacterized protein C17orf59	C17orf59	26923	25937	24402	21925	20218	30678	24602	27991	21467	19645	30575.1	25867.4	26878.5	20961.7	19336.7	1	0.963377	0.906363	0.814359	0.750956	1.13565	0.960792	0.998346	0.778578	0.718221	0.13565	-0.00258486	0.0919836	-0.0357814	-0.0327357	0.156532	NO
Q9NP66	High mobility group protein 20A	HMG20A	96392	84540	72208	55025	47014	106520	83670	75812	57173	48262	106163	87973.6	72798.8	55827.1	47504.5	1	0.877044	0.749108	0.570846	0.487738	1.10136	0.912665	0.755237	0.579168	0.492826	0.101365	0.035621	0.00612899	0.00832144	0.00508853	0.156525	NO
P36543	V-type proton ATPase subunit E 1	ATP6V1E1	312950	284060	288730	228300	212170	315910	298360	287620	245890	233980	314851	313706	276188	240102	230308	1	0.907685	0.922607	0.72951	0.677968	1.00607	1.00242	0.882532	0.76722	0.735924	0.00607294	0.0947314	-0.0400758	0.0377109	0.0579566	0.156396	NO
Q9Y3C4	EKC/KEOPS complex subunit TPRKB	TPRKB	79227	68946	67036	57230	38928	90302	69241	71078	54142	40471	89999.2	72802.4	68252.9	52867.5	39835.8	1	0.870234	0.846126	0.722355	0.491348	1.13597	0.918909	0.861486	0.667291	0.502806	0.135966	0.0486756	0.0153602	-0.0550637	0.0114579	0.156396	NO
P01137	Transforming growth factor beta-1;Latency-associated peptide	TGFB1	175570	150220	158410	139360	126570	186670	151020	172390	140690	131790	186044	158788	165538	137378	129721	1	0.855613	0.902261	0.793757	0.720909	1.05966	0.904413	0.942862	0.782469	0.738859	0.0596569	0.0487996	0.0406004	-0.0112884	0.0179499	0.155718	NO
P15170	Eukaryotic peptide chain release factor GTP-binding subunit ERF3A	GSPT1	1276200	1213000	1198700	986100	1063500	1451200	1190100	1136300	1092300	1097900	1.44633e+06	1.25131e+06	1.09114e+06	1.06659e+06	1.08067e+06	1	0.950478	0.939273	0.772685	0.833333	1.13331	0.980499	0.854989	0.835752	0.846786	0.133312	0.0300211	-0.084284	0.0630675	0.0134522	0.155569	NO
Q5MNZ9	WD repeat domain phosphoinositide-interacting protein 1	WIPI1	83074	78626	72350	58565	58947	83088	76035	76948	65774	64620	82809.3	79945.9	73889.6	64225.6	63605.7	1	0.946457	0.87091	0.704974	0.709572	0.996814	0.962345	0.889444	0.773114	0.765652	-0.00318576	0.0158879	0.0185333	0.0681398	0.0560794	0.155455	NO
Q8NF91	Nesprin-1	SYNE1	28374	22893	26204	18662	21198	30318	21814	25281	22700	22499	30216.3	22936	24276.2	22165.6	22145.9	1	0.80683	0.923522	0.657715	0.747092	1.06493	0.808346	0.855579	0.781195	0.780498	0.0649299	0.0015157	-0.067943	0.12348	0.033406	0.155389	NO
P49789	Bis(5-adenosyl)-triphosphatase	FHIT	39277	37593	37813	28807	32932	41242	36139	41383	33379	31586	41103.7	37997.8	39738.2	32593.2	31090.2	1	0.957125	0.962726	0.733432	0.838455	1.04651	0.967432	1.01174	0.82983	0.791563	0.0465078	0.0103067	0.0490159	0.0963985	-0.0468917	0.155337	NO
P06396	Gelsolin	GSN	511450	468330	468300	385000	344410	524880	460590	491800	418070	374860	523120	484281	472253	408228	368976	1	0.915691	0.915632	0.752762	0.673399	1.02282	0.946878	0.923361	0.798179	0.721432	0.0228169	0.0311869	0.00772896	0.0454168	0.0480327	0.155182	NO
O43502	DNA repair protein RAD51 homolog 3	RAD51C	18507	17402	14145	13202	11126	20419	17296	14450	13774	11574	20350.5	18185.6	13875.7	13449.8	11392.3	1	0.940293	0.764305	0.713352	0.601178	1.09961	0.982635	0.749753	0.726739	0.615569	0.0996121	0.0423419	-0.0145528	0.013387	0.0143912	0.155179	NO
P36969	Phospholipid hydroperoxide glutathione peroxidase, mitochondrial	GPX4	537850	469300	479490	387180	390880	577010	460910	484320	424760	415080	575075	484617	465070	414761	408565	1	0.872548	0.891494	0.719866	0.726745	1.06921	0.901026	0.864684	0.771146	0.759626	0.0692105	0.0284782	-0.0268099	0.05128	0.032881	0.15504	NO
Q32P44	Echinoderm microtubule-associated protein-like 3	EML3	568360	511180	448040	291600	256580	580180	478290	489450	351870	273390	578234	502891	469996	343587	269099	1	0.899395	0.788303	0.513055	0.451439	1.01737	0.884811	0.826934	0.604523	0.473466	0.0173732	-0.0145842	0.0386311	0.0914681	0.0220264	0.154915	NO
Q96DU7	Inositol-trisphosphate 3-kinase C	ITPKC	44940	40726	37981	28061	24058	47127	38830	38994	30805	27843	46968.9	40827.2	37444.1	30079.8	27406	1	0.906231	0.845149	0.62441	0.535336	1.04515	0.908483	0.833203	0.669333	0.609835	0.045148	0.00225249	-0.0119459	0.0449229	0.074499	0.154876	NO
Q92466	DNA damage-binding protein 2	DDB2	127130	117960	112610	91714	95991	124830	113440	120590	104420	105290	124411	119275	115797	101962	103637	1	0.927869	0.885786	0.721419	0.755062	0.978615	0.938211	0.910855	0.802029	0.815208	-0.0213848	0.0103422	0.0250692	0.0806096	0.0601463	0.154783	NO
Q14686	Nuclear receptor coactivator 6	NCOA6	143650	134680	129990	108170	111320	144550	132910	142110	117770	116580	144065	139746	136462	114998	114750	1	0.937557	0.904908	0.753011	0.774939	1.00289	0.972825	0.94996	0.80054	0.798818	0.0028905	0.035268	0.045052	0.0475297	0.0238788	0.154619	NO
Q5T3I0	G patch domain-containing protein 4	GPATCH4	66889	58660	58813	45512	43604	70816	55671	60080	48896	50043	70578.5	58534.4	57692.1	47745	49257.5	1	0.876975	0.879263	0.680411	0.651886	1.05516	0.875098	0.862505	0.713794	0.736407	0.0551586	-0.00187704	-0.0167581	0.0333831	0.0845212	0.154428	NO
Q9NX70	Mediator of RNA polymerase II transcription subunit 29	MED29	48028	37063	34143	26100	26204	48020	36305	38096	29465	28009	47859	38172.4	36581.8	28771.4	27569.4	1	0.771696	0.710898	0.543433	0.545598	0.99648	0.794794	0.761677	0.599054	0.574027	-0.00351973	0.0230981	0.0507796	0.0556213	0.0284288	0.154408	NO
Q13185	Chromobox protein homolog 3	CBX3	508050	405830	443050	324740	324400	535560	405740	451200	378650	326220	533764	426609	433267	369736	321100	1	0.798799	0.87206	0.639189	0.63852	1.05061	0.839699	0.852803	0.727756	0.632024	0.0506129	0.0409001	-0.0192566	0.0885669	-0.00649593	0.154327	NO
Q8NFH3	Nucleoporin Nup43	NUP43	372160	340190	299200	240960	222330	444450	319300	301890	248100	224690	442959	335723	289891	242260	221163	1	0.914096	0.803955	0.647463	0.597404	1.19024	0.902094	0.778942	0.650956	0.594269	0.190239	-0.0120022	-0.0250131	0.00349206	-0.00313486	0.153581	NO
Q6PCD5	E3 ubiquitin-protein ligase RFWD3	RFWD3	12246	8480.4	6651.4	5783.9	5367.4	15001	7585	7267.8	5504.3	5208.8	14950.7	7975.14	6978.93	5374.73	5127.04	1	0.692504	0.543149	0.472309	0.438298	1.22086	0.651244	0.569895	0.438896	0.418671	0.220863	-0.0412595	0.0267463	-0.0334129	-0.0196273	0.15331	NO
P17483	Homeobox protein Hox-B4	HOXB4	16833	16851	17365	14763	15140	18282	16081	17963	15773	15997	18220.7	16908.1	17249	15401.7	15745.9	1	1.00107	1.0316	0.877027	0.899424	1.08244	1.00446	1.02472	0.91497	0.935419	0.0824385	0.00339385	-0.00688856	0.0379431	0.0359957	0.152883	NO
P13929	Beta-enolase	ENO3	44319	41933	38099	33177	25907	48765	41998	38276	33836	28092	48601.5	44158.2	36754.7	33039.5	27651.1	1	0.946163	0.859654	0.748595	0.584557	1.09663	0.996371	0.829321	0.745493	0.62391	0.096628	0.0502081	-0.0303327	-0.00310287	0.0393528	0.152753	NO
Q7Z6L1	Tectonin beta-propeller repeat-containing protein 1	TECPR1	10857	8708.2	7885.9	5854.2	4417.9	11137	8224.1	8902.1	6500.1	4813.7	11099.6	8647.11	8548.28	6347.08	4738.15	1	0.802082	0.726342	0.53921	0.406917	1.02235	0.796455	0.787352	0.584608	0.436414	0.0223496	-0.00562698	0.0610093	0.0453979	0.0294967	0.152626	NO
Q8NCN2	Zinc finger and BTB domain-containing protein 34	ZBTB34	49324	42708	43565	33723	29108	52987	42183	43158	36070	32642	52809.3	44352.7	41442.6	35220.9	32129.7	1	0.865867	0.883241	0.683704	0.590139	1.07066	0.899211	0.840213	0.714072	0.6514	0.0706613	0.0333446	-0.0430288	0.0303685	0.0612615	0.152607	NO
Q92665	28S ribosomal protein S31, mitochondrial	MRPS31	76515	61647	57921	44340	43492	81470	58775	60552	49669	46657	81196.8	61798.1	58145.3	48499.8	45924.7	1	0.805685	0.756989	0.579494	0.568411	1.06119	0.80766	0.75992	0.63386	0.600205	0.0611876	0.00197479	0.00293155	0.0543654	0.0317936	0.152253	NO
P27348	14-3-3 protein theta	YWHAQ	977300	867820	899190	727370	744330	1051700	868820	875530	830270	763470	1.04817e+06	913508	840731	810725	751487	1	0.887977	0.920076	0.744265	0.761619	1.07252	0.934726	0.860259	0.829556	0.768942	0.0725191	0.0467491	-0.0598165	0.0852911	0.00732302	0.152066	NO
P47756	F-actin-capping protein subunit beta	CAPZB	1170200	1067700	1048400	894480	884030	1289700	1033000	1066400	969100	915190	1.28537e+06	1.08613e+06	1.02401e+06	946287	900825	1	0.912408	0.895915	0.764382	0.755452	1.09842	0.92816	0.875077	0.808654	0.769805	0.0984231	0.0157516	-0.0208383	0.0442718	0.0143526	0.151961	NO
P09972	Fructose-bisphosphate aldolase C	ALDOC	1049700	977200	946660	840140	824860	1179300	941320	995550	857110	853320	1.17534e+06	989737	955981	836933	839927	1	0.930933	0.901839	0.800362	0.785805	1.1197	0.942876	0.910718	0.797307	0.800159	0.119696	0.0119434	0.00887967	-0.00305495	0.0143532	0.151817	NO
Q9NP61	ADP-ribosylation factor GTPase-activating protein 3	ARFGAP3	630850	625190	579300	470290	466600	636630	593850	592810	517620	542910	634495	624395	569248	505435	534389	1	0.991028	0.918285	0.745486	0.739637	1.00578	0.989767	0.902351	0.801197	0.847093	0.0057778	-0.00126057	-0.0159337	0.0557105	0.107456	0.15175	NO
P46019	Phosphorylase b kinase regulatory subunit alpha, liver isoform	PHKA2	60578	49130	37679	28067	22757	66808	46039	43358	30296	21518	66583.9	48407	41634.7	29582.8	21180.3	1	0.811021	0.621991	0.46332	0.375664	1.09914	0.799086	0.687291	0.488343	0.349636	0.099144	-0.0119346	0.0652993	0.0250226	-0.0260283	0.151503	NO
P15559	NAD(P)H dehydrogenase [quinone] 1	NQO1	560140	540800	485870	365920	355710	581210	534300	498820	400290	388310	579261	561782	478994	390867	382215	1	0.965473	0.867408	0.653265	0.635038	1.03414	1.00293	0.855133	0.697802	0.682357	0.0341357	0.0374581	-0.0122756	0.044537	0.0473189	0.151174	NO
P62070	Ras-related protein R-Ras2	RRAS2	160660	142010	138980	113820	92947	160910	141580	140550	122030	111090	160370	148862	134964	119157	109346	1	0.883916	0.865057	0.708453	0.578532	0.998197	0.926567	0.840058	0.741674	0.680607	-0.00180285	0.0426503	-0.0249987	0.0332214	0.102075	0.151145	NO
A4D2B0	Metallo-beta-lactamase domain-containing protein 1	MBLAC1	13753	12409	13377	9825.2	9980.3	15981	13062	12096	10948	9606.3	15927.4	13733.8	11615.2	10690.3	9455.52	1	0.902276	0.972661	0.714404	0.725682	1.1581	0.998607	0.84456	0.777305	0.687524	0.158104	0.0963314	-0.1281	0.0629011	-0.0381573	0.151079	NO
Q8IUI8	Cytokine receptor-like factor 3	CRLF3	300200	277770	277620	227210	217240	330760	271410	276070	246790	227830	329651	285370	265097	240980	224254	1	0.925283	0.924783	0.756862	0.723651	1.0981	0.9506	0.883069	0.802733	0.747015	0.0981037	0.0253165	-0.0417143	0.0458709	0.0233646	0.150941	NO
Q969J3	Loss of heterozygosity 12 chromosomal region 1 protein	LOH12CR1	28654	25561	25849	24788	19952	34918	24195	26713	23934	20181	34800.9	25439.5	25651.3	23370.6	19864.2	1	0.892057	0.902108	0.86508	0.696308	1.21452	0.887816	0.895207	0.815613	0.693245	0.214521	-0.00424117	-0.00690066	-0.0494667	-0.00306258	0.15085	NO
Q9BXL5	Hemogen	HEMGN	1329900	1177400	1215300	959440	1025500	1360600	1163300	1241800	1092500	1086800	1.35604e+06	1.22313e+06	1.19244e+06	1.06678e+06	1.06974e+06	1	0.88533	0.913828	0.721438	0.771111	1.01965	0.919719	0.896642	0.802152	0.804378	0.0196533	0.0343894	-0.0171866	0.0807144	0.0332671	0.150838	NO
O75608	Acyl-protein thioesterase 1	LYPLA1	150060	141110	132710	109020	110720	147060	139160	141560	116750	125310	146567	146318	135934	114002	123343	1	0.940357	0.88438	0.726509	0.737838	0.976721	0.975061	0.905861	0.759707	0.821959	-0.0232787	0.0347042	0.0214819	0.0331977	0.0841208	0.150226	NO
Q15637	Splicing factor 1	SF1	674340	614770	602450	476660	470860	710750	591730	608700	529630	516250	708366	622166	584507	517162	508147	1	0.911662	0.893392	0.706854	0.698253	1.05046	0.922629	0.866783	0.766916	0.753547	0.0504587	0.0109674	-0.0266087	0.0600621	0.0552942	0.150174	NO
P46976	Glycogenin-1	GYG1	76347	77164	71318	72738	78354	99781	72696	66122	75067	75899	99446.4	76435.1	63493.9	73299.9	74707.7	1	1.0107	0.93413	0.952729	1.02629	1.30256	1.00115	0.831649	0.960089	0.978528	0.302558	-0.0095468	-0.10248	0.00735964	-0.0477594	0.150131	NO
O60216	Double-strand-break repair protein rad21 homolog	RAD21	152540	123250	118660	75719	66743	163190	118140	127260	83547	70208	162643	124217	122202	81580.3	69106	1	0.807985	0.777894	0.496388	0.437544	1.06623	0.814321	0.801114	0.534812	0.453035	0.0662299	0.00633637	0.0232197	0.0384244	0.0154912	0.149702	NO
Q14849	StAR-related lipid transfer protein 3	STARD3	4737.2	5227.1	4741.6	4551.2	3813.4	6468.8	4857.9	4884.7	4165.7	3520.4	6447.11	5107.77	4690.55	4067.64	3465.14	1	1.10342	1.00093	0.960736	0.80499	1.36095	1.07822	0.990153	0.858659	0.731475	0.360953	-0.0251907	-0.0107757	-0.102078	-0.073515	0.149394	NO
Q96EP5	DAZ-associated protein 1	DAZAP1	263720	251490	243240	201870	217860	282560	241270	241210	225070	234540	281612	253680	231623	219772	230859	1	0.953625	0.922342	0.765471	0.826103	1.06785	0.961928	0.878291	0.833353	0.875393	0.0678461	0.00830335	-0.0440509	0.0678816	0.0492899	0.14927	NO
Q8WY36	HMG box transcription factor BBX	BBX	27608	24179	25452	21222	16618	31177	23593	25703	20138	19277	31072.4	24806.5	24681.4	19663.9	18974.4	1	0.875797	0.921907	0.76869	0.601927	1.12549	0.898526	0.893995	0.712255	0.68728	0.125487	0.0227293	-0.0279118	-0.056435	0.0853533	0.149223	NO
Q01813	ATP-dependent 6-phosphofructokinase, platelet type	PFKP	1742800	1598400	1420300	1031400	958880	1674800	1532900	1514100	1189000	1133500	1.66918e+06	1.61174e+06	1.45392e+06	1.16101e+06	1.11571e+06	1	0.917145	0.814953	0.591806	0.550195	0.957759	0.924802	0.834244	0.666175	0.640182	-0.0422405	0.00765719	0.0192912	0.074369	0.0899867	0.149064	NO
Q6UB99	Ankyrin repeat domain-containing protein 11	ANKRD11	72504	63089	64786	52365	51304	74875	63826	66386	58153	53430	74623.9	67108.9	63747.4	56784.1	52591.4	1	0.870145	0.893551	0.722236	0.707602	1.02924	0.925589	0.879226	0.783185	0.725358	0.0292383	0.0554438	-0.0143243	0.0609491	0.017756	0.149063	NO
P19447	TFIIH basal transcription factor complex helicase XPB subunit	ERCC3	30876	38805	28320	34531	42612	30043	44440	37232	31452	37194	29942.2	46725.8	35752.2	30711.6	36610.2	1	1.2568	0.917217	1.11838	1.3801	0.969758	1.51334	1.15793	0.994676	1.18572	-0.0302421	0.256535	0.240711	-0.123701	-0.194384	0.148919	NO
Q9UPN7	Serine/threonine-protein phosphatase 6 regulatory subunit 1	PPP6R1	292550	257250	236660	167970	146220	294020	249800	268380	178200	159290	293034	262649	257713	174005	156790	1	0.879337	0.808956	0.574158	0.499812	1.00165	0.89779	0.88092	0.594788	0.535942	0.00165422	0.0184533	0.0719638	0.0206292	0.03613	0.14883	NO
P50552	Vasodilator-stimulated phosphoprotein	VASP	777650	747140	735410	631480	642220	863960	734130	742560	664130	665490	861063	771890	713046	648496	655045	1	0.960766	0.945683	0.812036	0.825847	1.10726	0.992593	0.916924	0.833918	0.842339	0.107262	0.0318268	-0.0287581	0.0218814	0.0164916	0.148704	NO
O75822	Eukaryotic translation initiation factor 3 subunit J	EIF3J	636140	552850	571150	403030	463740	686640	525350	546200	501040	478570	684337	552371	524491	489245	471059	1	0.86907	0.897837	0.633556	0.72899	1.07577	0.868317	0.82449	0.769084	0.740495	0.0757651	-0.000752257	-0.0733474	0.135529	0.0115045	0.148699	NO
Q8TE04	Pantothenate kinase 1	PANK1	34024	29839	32039	28117	25525	38491	29479	30226	28464	28871	38361.9	30995.3	29024.6	27793.9	28417.8	1	0.876999	0.941659	0.826387	0.750206	1.1275	0.910982	0.853064	0.816892	0.83523	0.127496	0.0339836	-0.0885951	-0.00949496	0.0850238	0.148413	NO
Q9BUL9	Ribonuclease P protein subunit p25	RPP25	38751	33414	33744	28345	25940	40610	32787	33471	31984	28065	40473.8	34473.4	32140.7	31231.1	27624.5	1	0.862275	0.87079	0.731465	0.669402	1.04446	0.889613	0.829415	0.805943	0.712872	0.0444584	0.0273388	-0.0413753	0.0744776	0.0434698	0.148369	NO
Q8IW45	ATP-dependent (S)-NAD(P)H-hydrate dehydratase	CARKD	113880	102150	99838	84265	73526	115010	95872	108920	93774	80228	114624	100803	104591	91566.5	78968.8	1	0.896997	0.876695	0.739946	0.645645	1.00654	0.88517	0.918431	0.804061	0.693438	0.00653573	-0.0118266	0.0417359	0.0641159	0.0477939	0.148355	NO
P55957	BH3-interacting domain death agonist;BH3-interacting domain death agonist p15;BH3-interacting domain death agonist p13;BH3-interacting domain death agonist p11	BID	289230	263080	250540	209780	206430	309510	252090	263330	220340	223830	308472	265056	252864	215153	220317	1	0.909588	0.866231	0.725305	0.713723	1.06653	0.91642	0.874265	0.743882	0.761736	0.0665283	0.00683293	0.00803415	0.0185772	0.0480131	0.147986	NO
Q8N465	D-2-hydroxyglutarate dehydrogenase, mitochondrial	D2HGDH	80308	74832	71180	62576	60276	81307	74743	76109	65265	65651	81034.3	78587.4	73084	63728.6	64620.6	1	0.931813	0.886338	0.7792	0.75056	1.00904	0.978575	0.910046	0.793553	0.804659	0.00904417	0.0467627	0.0237085	0.0143526	0.0540987	0.147967	NO
O75348	V-type proton ATPase subunit G 1	ATP6V1G1	224750	205410	195020	154190	169130	268920	199550	191010	170990	155930	268018	209814	183418	166965	153483	1	0.913949	0.86772	0.686051	0.752525	1.19252	0.933543	0.816099	0.742891	0.682904	0.192517	0.0195946	-0.0516212	0.0568401	-0.0696215	0.147709	NO
O14818	Proteasome subunit alpha type-7	PSMA7	932490	863320	832000	660870	737340	1006100	810030	828120	763360	780580	1.00273e+06	851694	795206	745390	768328	1	0.925822	0.892235	0.708715	0.790722	1.07532	0.913355	0.852777	0.799355	0.823953	0.0753207	-0.0124677	-0.0394582	0.0906392	0.0332317	0.147266	NO
A6NDU8	UPF0600 protein C5orf51	C5orf51	306090	279310	270410	200340	211550	316220	270600	266430	234710	231630	315159	284518	255841	229185	227994	1	0.912509	0.883433	0.654513	0.691137	1.02963	0.929525	0.835834	0.74875	0.744861	0.0296301	0.0170158	-0.0475987	0.0942364	0.0537241	0.147008	NO
Q13838	Spliceosome RNA helicase DDX39B	DDX39B	315270	273330	273600	220620	227980	343590	264240	274090	250070	233140	342438	277831	263196	244183	229481	1	0.866971	0.867828	0.699781	0.723126	1.08617	0.881249	0.834827	0.774521	0.727886	0.0861728	0.0142774	-0.0330001	0.0747398	0.00476005	0.14695	NO
O94826	Mitochondrial import receptor subunit TOM70	TOMM70A	115620	106390	100990	81071	76497	116810	109610	105210	86981	81163	116418	115248	101028	84933.4	79889.1	1	0.92017	0.873465	0.701185	0.661624	1.0069	0.996781	0.873796	0.734591	0.690963	0.0069041	0.0766114	0.00033157	0.0334062	0.0293383	0.146592	NO
Q14116	Interleukin-18	IL18	115600	108330	107390	87927	85622	116780	107370	110270	94273	96089	116388	112893	105887	92053.8	94580.8	1	0.937111	0.928979	0.760614	0.740675	1.00682	0.97658	0.915979	0.796313	0.818173	0.00681966	0.0394688	-0.0129998	0.0356987	0.0774984	0.146486	NO
Q9Y6J0	Calcineurin-binding protein cabin-1	CABIN1	36214	33562	31935	24939	23491	42916	30221	30516	26801	25815	42772.1	31775.4	29303.1	26170.1	25409.8	1	0.926769	0.881841	0.688656	0.648672	1.18109	0.877435	0.809165	0.722651	0.701657	0.181092	-0.0493339	-0.0726759	0.0339949	0.0529855	0.146063	NO
Q86SX6	Glutaredoxin-related protein 5, mitochondrial	GLRX5	98990	89866	85595	61756	53594	109340	82066	88130	73298	53609	108973	86287.1	84627.2	71572.5	52767.6	1	0.907829	0.864683	0.623861	0.541408	1.10085	0.871675	0.854907	0.723028	0.53306	0.100852	-0.0361544	-0.00977679	0.0991669	-0.00834864	0.145739	NO
Q9BVT8	Transmembrane and ubiquitin-like domain-containing protein 1	TMUB1	11623	10049	9302.9	7993.3	7882.3	11924	9291.1	10608	8869.7	8171.1	11884	9768.99	10186.4	8660.9	8042.85	1	0.864579	0.800387	0.687714	0.678164	1.02246	0.840488	0.876398	0.745152	0.691977	0.0224564	-0.0240911	0.076011	0.0574381	0.013813	0.145627	NO
Q9H8Y5	Ankyrin repeat and zinc finger domain-containing protein 1	ANKZF1	49568	36102	29907	21792	18831	51157	32343	33106	25273	22292	50985.4	34006.6	31790.2	24678.1	21942.1	1	0.728333	0.603353	0.439638	0.379902	1.0286	0.686059	0.641345	0.497863	0.442667	0.0285957	-0.0422739	0.0379917	0.0582243	0.0627645	0.145302	NO
Q8IZL2	Mastermind-like protein 2	MAML2	25173	22897	22909	22330	18697	24592	22827	26966	21837	20253	24509.5	24001.1	25894.2	21322.9	19935.1	1	0.909586	0.910062	0.887062	0.74274	0.973643	0.953447	1.02865	0.847056	0.791924	-0.0263566	0.0438609	0.118588	-0.0400053	0.0491842	0.145271	NO
P28066	Proteasome subunit alpha type-5	PSMA5	1218900	1095200	1052200	775380	847950	1290000	1062100	1053500	904370	882890	1.28567e+06	1.11673e+06	1.01163e+06	883081	869032	1	0.898515	0.863237	0.636131	0.695668	1.05478	0.916178	0.829951	0.72449	0.712964	0.0547819	0.0176629	-0.033286	0.0883589	0.0172963	0.144814	NO
Q8WXI9	Transcriptional repressor p66-beta	GATAD2B	285520	243670	212190	165340	163260	325490	226670	217030	181540	165520	324398	238329	208404	177266	162922	1	0.853425	0.74317	0.579084	0.571799	1.13617	0.834718	0.72991	0.620855	0.570615	0.136167	-0.0187069	-0.0132602	0.041771	-0.00118365	0.144787	NO
Q9BQG2	Peroxisomal NADH pyrophosphatase NUDT12	NUDT12	662160	593150	583380	465350	433130	671470	581150	594460	514670	487010	669218	611042	570833	502554	479366	1	0.89578	0.881026	0.702776	0.654117	1.01066	0.9228	0.862077	0.758962	0.723943	0.0106592	0.02702	-0.0189491	0.0561864	0.0698261	0.144743	NO
P78345	Ribonuclease P protein subunit p38	RPP38	330850	284300	286520	200530	188610	356330	260070	304170	233850	192690	355135	273447	292080	228345	189666	1	0.859302	0.866012	0.606105	0.570077	1.0734	0.826498	0.882818	0.690177	0.573268	0.0734018	-0.0328042	0.0168067	0.0840715	0.00319055	0.144666	NO
Q9Y5V0	Zinc finger protein 706	ZNF706	83754	82817	78852	62771	67204	82479	80043	71024	73159	82792	82202.4	84160	68201.1	71436.8	81492.5	1	0.988812	0.941471	0.749469	0.802397	0.981474	1.00485	0.814302	0.852936	0.972999	-0.0185258	0.0160353	-0.127169	0.103467	0.170601	0.144409	NO
Q5JS37	NHL repeat-containing protein 3	NHLRC3	26303	21568	25312	22989	18599	32513	21893	22204	22221	20447	32404	23019.1	21321.5	21697.9	20126.1	1	0.819983	0.962324	0.874007	0.707106	1.23195	0.87515	0.81061	0.824921	0.765163	0.231949	0.0551675	-0.151713	-0.0490854	0.0580569	0.144375	NO
O75884	Putative hydrolase RBBP9	RBBP9	61772	53178	53450	44639	45009	64248	52615	54389	49000	48294	64032.5	55321.3	52227.3	47846.5	47536	1	0.860875	0.865279	0.722641	0.728631	1.03659	0.895572	0.845484	0.774566	0.769539	0.0365947	0.0346963	-0.0197944	0.0519251	0.0409084	0.14433	NO
Q02446	Transcription factor Sp4	SP4	10940	8794.8	9226.1	7989	7463.6	11129	8623.8	10198	8857.3	7509.8	11091.7	9067.37	9792.67	8648.79	7391.93	1	0.803912	0.843336	0.730256	0.68223	1.01386	0.828827	0.895125	0.790566	0.675679	0.0138644	0.0249147	0.051789	0.0603103	-0.00655134	0.144327	NO
Q8TBE9	N-acylneuraminate-9-phosphatase	NANP	100400	86711	83999	64001	56121	99518	83181	93771	69535	62098	99184.2	87459.4	90044	67898.1	61123.3	1	0.863655	0.836643	0.63746	0.558974	0.987891	0.87111	0.896852	0.676276	0.608798	-0.0121091	0.00745446	0.0602091	0.0388159	0.049824	0.144194	NO
P08754	Guanine nucleotide-binding protein G(k) subunit alpha	GNAI3	70059	67102	67151	66954	54890	77609	66944	70568	63026	60160	77348.7	70387.3	67763.2	61542.3	59215.7	1	0.957793	0.958492	0.95568	0.783482	1.10405	1.00469	0.967231	0.878436	0.845227	0.104051	0.046893	0.00873853	-0.0772444	0.0617443	0.144183	NO
Q99767	Amyloid beta A4 precursor protein-binding family A member 2	APBA2	53928	50944	46932	36912	31458	57255	50909	48654	38961	33099	57063	53527.5	46720.2	38043.8	32579.5	1	0.944667	0.870271	0.684468	0.583333	1.05813	0.992574	0.866344	0.705456	0.604129	0.0581328	0.0479067	-0.00392738	0.020988	0.020796	0.143896	NO
O75128	Protein cordon-bleu	COBL	55863	52246	48798	43850	39580	71772	46215	52601	43137	36185	71531.3	48592.1	50510.3	42121.5	35617.1	1	0.935252	0.87353	0.784956	0.708519	1.28048	0.869844	0.904182	0.754015	0.637579	0.280477	-0.0654087	0.0306523	-0.0309412	-0.0709405	0.143839	NO
Q6ICL3	Transport and Golgi organization protein 2 homolog	TANGO2	73371	73034	63094	59062	57529	79207	74177	65376	58424	60838	78941.4	77992.3	62777.6	57048.7	59883.1	1	0.995407	0.859931	0.804977	0.784084	1.07592	1.06299	0.855618	0.777537	0.816169	0.0759205	0.0675785	-0.00431269	-0.0274404	0.0320849	0.143831	NO
Q01469	Fatty acid-binding protein, epidermal	FABP5	726840	675220	666470	530040	629040	771690	652500	638540	634180	654830	769102	686061	613161	619251	644552	1	0.92898	0.916942	0.729239	0.865445	1.05814	0.943896	0.843598	0.851977	0.886787	0.0581448	0.0149159	-0.073344	0.122738	0.0213417	0.143797	NO
Q8WWK9	Cytoskeleton-associated protein 2	CKAP2	56979	47583	41174	30824	30177	56104	48398	47131	33286	30842	55915.8	50887.4	45257.7	32502.4	30357.9	1	0.835097	0.722617	0.540971	0.529616	0.981341	0.89309	0.794288	0.570428	0.532791	-0.0186587	0.0579926	0.0716709	0.029457	0.00317508	0.143637	NO
O75439	Mitochondrial-processing peptidase subunit beta	PMPCB	489710	441400	434790	346330	334580	480360	442900	451710	392270	361600	478749	465681	433756	383036	355924	1	0.90135	0.887852	0.707214	0.683221	0.977617	0.950931	0.885741	0.782169	0.726807	-0.0223826	0.0495817	-0.00211066	0.0749541	0.0435859	0.143628	NO
P15311	Ezrin	EZR	1721300	1577400	1551800	1195600	1304000	1826200	1489100	1553500	1375500	1398200	1.82008e+06	1.56569e+06	1.49175e+06	1.34312e+06	1.37625e+06	1	0.9164	0.901528	0.694591	0.757567	1.05738	0.909599	0.866644	0.780294	0.799544	0.0573842	-0.00680178	-0.0348836	0.0857027	0.0419766	0.143378	NO
P20674	Cytochrome c oxidase subunit 5A, mitochondrial	COX5A	177010	162770	161210	133270	145220	195030	161860	152470	146270	153440	194376	170185	146410	142827	151032	1	0.919553	0.91074	0.752895	0.820406	1.09811	0.961445	0.827128	0.806885	0.853238	0.098107	0.041892	-0.0836114	0.0539898	0.0328323	0.14321	NO
P00441	Superoxide dismutase [Cu-Zn]	SOD1	736930	652910	686850	585080	629530	761070	646510	670620	676880	663880	758518	679763	643966	660946	653460	1	0.885986	0.932042	0.793942	0.85426	1.02929	0.922426	0.873849	0.896891	0.886733	0.0292939	0.0364395	-0.0581933	0.102949	0.0324725	0.142961	NO
Q9H040	SprT-like domain-containing protein Spartan	SPRTN	2688.8	2122.9	2601.9	1752.3	2162.7	2876	2357.2	2786.2	2062.2	1705.7	2866.35	2478.44	2675.46	2013.65	1678.93	1	0.789534	0.967681	0.651703	0.804337	1.06603	0.921765	0.995039	0.748905	0.624415	0.0660349	0.132231	0.0273579	0.0972013	-0.179921	0.142904	NO
Q9NVA2	Septin-11	44450	428850	392950	380650	296390	309440	462820	366510	390440	345080	315980	461268	385361	374922	336957	311020	1	0.916288	0.887606	0.691127	0.721558	1.07559	0.898593	0.874249	0.785721	0.725243	0.0755925	-0.017695	-0.0133575	0.094594	0.00368536	0.142819	NO
P16298	Serine/threonine-protein phosphatase 2B catalytic subunit beta isoform	PPP3CB	16015	14924	14707	16894	12015	21320	15350	15817	13072	11683	21248.5	16139.5	15188.3	12764.3	11499.6	1	0.931876	0.918327	1.05489	0.750234	1.32679	1.00778	0.948382	0.79702	0.718054	0.326787	0.0758994	0.0300555	-0.257866	-0.0321806	0.142696	NO
Q8NFZ5	TNFAIP3-interacting protein 2	TNIP2	10891	11313	10811	10532	8048.8	13526	11621	11985	8919.9	7344.9	13480.6	12218.7	11508.6	8709.92	7229.62	1	1.03875	0.992654	0.967037	0.739032	1.23778	1.12191	1.05671	0.799736	0.663816	0.237778	0.083163	0.0640571	-0.167301	-0.0752166	0.14248	NO
O43543	DNA repair protein XRCC2	XRCC2	29008	23623	22895	17866	11612	30450	23963	25094	17621	12479	30347.9	25195.5	24096.6	17206.2	12283.1	1	0.814362	0.789265	0.615899	0.400303	1.04619	0.868572	0.830689	0.593153	0.42344	0.04619	0.0542106	0.0414236	-0.0227457	0.0231361	0.142215	NO
Q9UNN8	Endothelial protein C receptor	PROCR	48882	48481	44435	40165	42569	48407	45992	45857	44015	48631	48244.7	48357.6	44034.4	42978.9	47867.7	1	0.991797	0.909026	0.821673	0.870852	0.986962	0.989272	0.90083	0.879237	0.97925	-0.0130384	-0.00252433	-0.00819579	0.0575645	0.108398	0.142204	NO
Q9BSU3	N-alpha-acetyltransferase 11	NAA11	106710	88466	87685	62728	51252	116900	85450	91570	72028	48139	116508	89845.1	87930.5	70332.4	47383.4	1	0.829032	0.821713	0.587836	0.480292	1.09182	0.841956	0.824013	0.659099	0.444039	0.0918185	0.0129241	0.00230035	0.0712625	-0.0362532	0.142052	NO
P35237	Serpin B6	SERPINB6	2056800	1891900	1883000	1501700	1697800	2131400	1842000	1803500	1742000	1858700	2.12425e+06	1.93674e+06	1.73182e+06	1.70099e+06	1.82953e+06	1	0.919827	0.9155	0.730115	0.825457	1.03279	0.94163	0.841996	0.827009	0.889501	0.0327946	0.0218026	-0.0735034	0.0968944	0.0640443	0.142033	NO
P54252	Ataxin-3	ATXN3	181770	179440	157550	115530	92255	195240	179860	164120	122940	92463	194585	189111	157597	120046	91011.7	1	0.987182	0.866755	0.635583	0.507537	1.0705	1.04039	0.867013	0.660428	0.500697	0.0705024	0.0532053	0.000258054	0.0248442	-0.00683981	0.14197	NO
P48382	DNA-binding protein RFX5	RFX5	58818	53417	56191	47522	44828	63739	51767	59625	47424	48363	63525.2	54429.6	57255.2	46307.6	47603.9	1	0.908174	0.955337	0.80795	0.762148	1.08003	0.925391	0.973429	0.787303	0.809343	0.0800306	0.0172166	0.0180923	-0.0206465	0.0471949	0.141888	NO
P63220	40S ribosomal protein S21	RPS21	318550	288520	280510	227050	244090	341760	290730	286260	245540	246820	340614	305684	274882	239760	242946	1	0.905729	0.880584	0.712761	0.766253	1.06926	0.95961	0.862917	0.75266	0.762662	0.0692633	0.0538808	-0.0176665	0.0398991	-0.00359133	0.141786	NO
P07355	Annexin A2;Putative annexin A2-like protein	ANXA2;ANXA2P2	1171500	1142700	1071400	900770	980080	1239800	1089600	1100000	990210	1044100	1.23564e+06	1.14564e+06	1.05628e+06	966900	1.02771e+06	1	0.975416	0.914554	0.768903	0.836603	1.05475	0.977929	0.901647	0.825352	0.877262	0.0547521	0.0025128	-0.0129069	0.056449	0.0406591	0.141466	NO
Q9BY11	Protein kinase C and casein kinase substrate in neurons protein 1	PACSIN1	38872	29609	29138	22398	18676	41637	27934	31986	23259	20210	41497.4	29370.8	30714.7	22711.5	19892.8	1	0.761705	0.749588	0.576199	0.480449	1.06754	0.755577	0.790149	0.584263	0.511751	0.0675386	-0.00612807	0.040561	0.00806421	0.0313025	0.141338	NO
Q7Z4H3	HD domain-containing protein 2	HDDC2	217350	209460	198310	160600	172960	215890	207140	203140	173280	195230	215166	217794	195066	169201	192166	1	0.963699	0.912399	0.7389	0.795767	0.989952	1.00204	0.897474	0.778472	0.88413	-0.0100485	0.038345	-0.0149251	0.0395717	0.0883631	0.141306	NO
P35914	Hydroxymethylglutaryl-CoA lyase, mitochondrial	HMGCL	133010	126610	117090	103920	106330	150710	122920	119340	108760	107190	150205	129242	114597	106200	105508	1	0.951883	0.88031	0.781295	0.799414	1.12927	0.971674	0.861565	0.798434	0.79323	0.129273	0.0197911	-0.018745	0.0171396	-0.00618317	0.141275	NO
P06730	Eukaryotic translation initiation factor 4E	EIF4E	600980	530320	543020	400980	433620	616390	521010	547060	469420	455130	614323	547808	525317	458370	447986	1	0.882425	0.903558	0.66721	0.721522	1.0222	0.911525	0.8741	0.762704	0.745426	0.0222017	0.0290995	-0.0294575	0.0954934	0.023905	0.141242	NO
Q92851	Caspase-10;Caspase-10 subunit p23/17;Caspase-10 subunit p12	CASP10	96390	78893	69360	36932	22453	105890	74591	74994	40418	22545	105535	78427.6	72013.3	39466.5	22191.1	1	0.818477	0.719577	0.383152	0.232939	1.09487	0.813649	0.747103	0.409446	0.230222	0.0948737	-0.0048283	0.0275267	0.0262946	-0.00271667	0.14115	NO
Q9C0C9	E2/E3 hybrid ubiquitin-protein ligase UBE2O	UBE2O	1108300	988070	957110	763420	761450	1153600	939710	990880	843540	834930	1.14973e+06	988044	951497	823683	821825	1	0.891519	0.863584	0.688821	0.687043	1.03738	0.891495	0.858519	0.743195	0.741519	0.0373826	-2.33413e-05	-0.00506487	0.054374	0.0544755	0.141144	NO
Q8TEP8	Centrosomal protein of 192 kDa	CEP192	66656	55870	53762	49577	40836	65909	53866	65036	49668	43507	65688	56636.6	62451.1	48498.8	42824.1	1	0.838184	0.806559	0.743774	0.612638	0.985477	0.849685	0.936916	0.727598	0.642465	-0.0145229	0.0115009	0.130357	-0.0161757	0.0298267	0.140986	NO
Q92769	Histone deacetylase 2	HDAC2	734980	667400	604170	419070	448740	798120	607320	596790	534870	455620	795443	638558	573070	522279	448469	1	0.908052	0.822022	0.570179	0.610547	1.08227	0.868809	0.779708	0.710603	0.610178	0.0822653	-0.0392424	-0.042314	0.140424	-0.000369101	0.140764	NO
P68104	Elongation factor 1-alpha 1;Putative elongation factor 1-alpha-like 3	EEF1A1;EEF1A1P5	2982800	2591700	2013300	1302900	1133800	3340400	2383600	2059800	1515200	1169800	3.3292e+06	2.5062e+06	1.97793e+06	1.47953e+06	1.15144e+06	1	0.868882	0.67497	0.436804	0.380113	1.11613	0.840218	0.663112	0.496021	0.386026	0.116132	-0.0286641	-0.0118575	0.0592167	0.00591362	0.14074	NO
P48449	Lanosterol synthase	LSS	20798	17151	16860	13419	11886	23303	17792	16595	13979	11705	23224.8	18707.1	15935.4	13649.9	11521.3	1	0.824647	0.810655	0.645206	0.571497	1.11669	0.899468	0.766199	0.65631	0.553961	0.116687	0.0748213	-0.0444554	0.0111034	-0.0175362	0.14062	NO
P48634	Protein PRRC2A	PRRC2A	1110900	990810	1006800	796350	769900	1150800	969330	1046800	863060	829620	1.14694e+06	1.01919e+06	1.00519e+06	842743	816599	1	0.891898	0.906292	0.716851	0.693042	1.03244	0.917443	0.904847	0.758613	0.735078	0.0324427	0.0255447	-0.00144566	0.0417618	0.0420367	0.14034	NO
Q96ER3	Protein SAAL1	SAAL1	293780	245500	261550	195830	189490	304550	236690	269360	224220	200520	303529	248864	258654	218942	197373	1	0.835659	0.890292	0.666587	0.645006	1.03318	0.847111	0.880435	0.745258	0.671838	0.0331834	0.0114514	-0.00985755	0.0786703	0.026832	0.140279	NO
Q96IK1	Biorientation of chromosomes in cell division protein 1	BOD1	42474	42419	35397	30993	27129	48897	40811	36838	31223	27293	48733	42910.1	35373.8	30488	26864.6	1	0.998705	0.83338	0.729693	0.63872	1.14736	1.01027	0.832835	0.717804	0.632496	0.147361	0.0115628	-0.000545243	-0.0118897	-0.00622459	0.140264	NO
Q96SZ5	2-aminoethanethiol dioxygenase	ADO	181480	163090	158900	151870	131240	195630	179600	163410	140310	136420	194974	188838	156915	137007	134279	1	0.898667	0.875579	0.836842	0.723165	1.07435	1.04054	0.864641	0.754943	0.73991	0.0743548	0.141877	-0.0109371	-0.0818986	0.0167445	0.14014	NO
O95707	Ribonuclease P protein subunit p29	POP4	69941	63221	59441	43041	36926	72790	59937	62281	49531	39224	72545.9	63019.9	59805.6	48365	38608.4	1	0.903919	0.849873	0.61539	0.527959	1.03724	0.901043	0.855086	0.691512	0.552013	0.037244	-0.00287572	0.00521278	0.0761215	0.0240539	0.139756	NO
P17707	S-adenosylmethionine decarboxylase proenzyme;S-adenosylmethionine decarboxylase alpha chain;S-adenosylmethionine decarboxylase beta chain	AMD1	61450	54460	53741	42965	36219	64045	53320	57148	44163	40144	63830.2	56062.5	54876.6	43123.4	39513.9	1	0.886249	0.874548	0.699186	0.589406	1.03873	0.912327	0.893029	0.701764	0.643025	0.0387341	0.0260785	0.0184801	0.0025774	0.0536194	0.139489	NO
P57721	Poly(rC)-binding protein 3	PCBP3	115470	108090	101940	86858	79883	122610	102590	111430	88523	86183	122199	107867	107001	86439.1	84830.3	1	0.936087	0.882827	0.752213	0.691807	1.05827	0.934154	0.926657	0.748585	0.734652	0.0582732	-0.00193355	0.0438306	-0.00362756	0.0428449	0.139387	NO
P06132	Uroporphyrinogen decarboxylase	UROD	775010	708180	695060	631080	622010	854360	701330	709720	648340	645960	851495	737403	681512	633078	635821	1	0.913769	0.89684	0.814286	0.802583	1.09869	0.951475	0.879358	0.816864	0.820404	0.0986887	0.0377066	-0.0174816	0.00257772	0.0178207	0.139312	NO
Q9P2S5	WD repeat-containing protein WRAP73	WRAP73	17006	15126	11683	13149	9900.7	19727	15074	14859	10869	8979.5	19660.8	15849.3	14268.4	10613.1	8838.56	1	0.889451	0.686993	0.773198	0.582189	1.15611	0.931985	0.839022	0.624082	0.519732	0.156112	0.042534	0.15203	-0.149116	-0.0624568	0.139103	NO
Q9H974	Queuine tRNA-ribosyltransferase subunit QTRTD1	QTRTD1	311440	278420	279910	219380	212170	318990	273950	289150	241900	228390	317920	288041	277657	236206	224805	1	0.893976	0.898761	0.704405	0.681255	1.02081	0.924867	0.891528	0.75843	0.721825	0.0208072	0.0308909	-0.0072326	0.054025	0.0405704	0.139061	NO
Q9Y365	PCTP-like protein	STARD10	87303	88087	79130	62008	63083	87361	85951	85323	67237	67784	87068	90371.9	81931.8	65654.2	66720.1	1	1.00898	0.906384	0.710262	0.722575	0.997308	1.03515	0.938476	0.752027	0.764236	-0.00269159	0.0261721	0.0320924	0.041765	0.0416604	0.138998	NO
Q9Y223	Bifunctional UDP-N-acetylglucosamine 2-epimerase/N-acetylmannosamine kinase;UDP-N-acetylglucosamine 2-epimerase (hydrolyzing);N-acetylmannosamine kinase	GNE	658710	609640	269700	154100	143030	657050	562930	413900	151360	136730	654846	591884	397449	147797	134584	1	0.925506	0.409437	0.233942	0.217137	0.994135	0.898551	0.603375	0.224373	0.204314	-0.00586534	-0.0269551	0.193938	-0.00956884	-0.0128221	0.138727	NO
Q9Y3E2	BolA-like protein 1	BOLA1	23787	21979	19588	19882	17864	26113	20905	22456	19888	17686	26025.4	21980.3	21563.5	19419.8	17408.4	1	0.923992	0.823475	0.835835	0.750998	1.0941	0.924045	0.906523	0.816405	0.731845	0.0941028	5.26315e-05	0.0830482	-0.0194297	-0.0191531	0.138621	NO
Q9UPT8	Zinc finger CCCH domain-containing protein 4	ZC3H4	491620	439750	432900	330450	330280	497480	423610	455260	365230	363770	495812	445398	437165	356632	358060	1	0.894492	0.880558	0.672165	0.67182	1.00853	0.905981	0.889234	0.725423	0.728328	0.00852609	0.0114895	0.00867599	0.0532572	0.0565078	0.138457	NO
Q69YQ0	Cytospin-A	SPECC1L	85611	81155	68195	58970	53771	86338	77335	74569	67850	55187	86048.4	81312.7	71605.2	66252.8	54320.8	1	0.947951	0.796568	0.688813	0.628085	1.00511	0.949793	0.836402	0.773882	0.634507	0.00510971	0.00184249	0.0398335	0.0850683	0.00642208	0.138276	NO
Q9BZQ8	Protein Niban	FAM129A	104250	100120	60767	45909	35780	116620	89724	70962	46162	38051	116229	94339	68141.6	45075.3	37453.8	1	0.960384	0.582897	0.440374	0.343213	1.11491	0.90493	0.653636	0.432377	0.359269	0.114905	-0.0554535	0.0707391	-0.00799689	0.0160553	0.138249	NO
P49903	Selenide, water dikinase 1	SEPHS1	161810	152980	152890	126360	129400	169950	148330	150050	140060	141810	169380	155959	144086	136763	139584	1	0.94543	0.944874	0.780916	0.799703	1.04678	0.963843	0.890465	0.845207	0.862643	0.0467835	0.0184128	-0.0544087	0.064291	0.0629392	0.138018	NO
P02042	Hemoglobin subunit delta	HBD	150510	144980	126300	134590	111080	176110	147400	131840	126230	109560	175519	154982	126600	123258	107840	1	0.963258	0.839147	0.894226	0.738024	1.16616	1.02971	0.841139	0.818939	0.7165	0.166164	0.066451	0.00199258	-0.0752875	-0.0215243	0.137796	NO
Q9BYG5	Partitioning defective 6 homolog beta	PARD6B	65830	56732	45765	33530	24576	69935	53645	54412	34374	23960	69700.5	56404.2	52249.3	33564.8	23583.9	1	0.861796	0.6952	0.509342	0.373325	1.05879	0.856817	0.793701	0.509871	0.358255	0.0587947	-0.0049789	0.0985014	0.000528928	-0.0150702	0.137776	NO
P48556	26S proteasome non-ATPase regulatory subunit 8	PSMD8	841580	787040	737770	505100	576490	908870	719960	717050	654070	582740	905822	756991	688550	638673	573593	1	0.935193	0.876649	0.600181	0.685009	1.07633	0.899488	0.818164	0.758897	0.681567	0.0763349	-0.0357052	-0.058485	0.158717	-0.00344177	0.13742	NO
Q9UKA9	Polypyrimidine tract-binding protein 2	PTBP2	46074	44719	42210	31137	29696	49450	44280	45563	34922	26892	49284.2	46557.5	43752.1	34099.9	26469.9	1	0.970591	0.916135	0.675804	0.644528	1.06967	1.0105	0.949604	0.740112	0.574509	0.069674	0.0399043	0.0334692	0.0643078	-0.0700197	0.137336	NO
Q7Z6J9	tRNA-splicing endonuclease subunit Sen54	TSEN54	232520	220450	202420	158760	153980	237430	214700	212920	176520	163340	236634	225743	204457	172365	160776	1	0.94809	0.870549	0.68278	0.662223	1.01769	0.970855	0.879311	0.741289	0.691451	0.0176919	0.0227642	0.00876186	0.0585095	0.0292287	0.136956	NO
P31949	Protein S100-A11;Protein S100-A11, N-terminally processed	S100A11	297520	280870	280070	227660	233540	311650	276740	270830	257960	250790	310605	290974	260066	251887	246854	1	0.944037	0.941348	0.765192	0.784956	1.04398	0.977999	0.874111	0.846624	0.829704	0.0439796	0.0339613	-0.0672371	0.0814315	0.0447488	0.136884	NO
P55263	Adenosine kinase	ADK	1147500	1033400	991630	763140	792510	1094300	1005700	998140	895590	918630	1.09063e+06	1.05743e+06	958468	874507	904211	1	0.900566	0.864166	0.665046	0.690641	0.95044	0.921506	0.835266	0.762098	0.787984	-0.0495599	0.0209397	-0.0288993	0.0970522	0.0973433	0.136876	NO
P32321	Deoxycytidylate deaminase	DCTD	194380	173080	177400	141200	148520	195710	172450	178480	158250	161430	195054	181320	171386	154525	158896	1	0.890421	0.912645	0.726412	0.76407	1.00347	0.932812	0.881707	0.794962	0.817452	0.00346561	0.0423912	-0.0309386	0.0685498	0.0533812	0.136849	NO
P29372	DNA-3-methyladenine glycosylase	MPG	130180	120800	118510	109660	97043	145800	115820	127460	105830	102730	145311	121777	122394	103339	101118	1	0.927946	0.910355	0.842372	0.745452	1.11623	0.935453	0.94019	0.793814	0.776752	0.116232	0.00750668	0.0298355	-0.0485581	0.0312996	0.136315	NO
Q15005	Signal peptidase complex subunit 2	SPCS2	18244	18287	9848.7	3575.9	3396.3	16412	16720	15722	4318.8	2628.6	16357	17580	15097.1	4217.13	2587.34	1	1.00236	0.539832	0.196004	0.18616	0.896566	0.963604	0.827511	0.231152	0.141819	-0.103434	-0.0387527	0.287679	0.0351476	-0.044341	0.136299	NO
P12980	Protein lyl-1	LYL1	6667.9	5296.6	6154.3	6830.4	4710.9	10058	4908.7	5818	6607.5	3396.6	10024.3	5161.18	5586.76	6451.96	3343.29	1	0.794343	0.922974	1.02437	0.706504	1.50336	0.774034	0.837859	0.967614	0.5014	0.503362	-0.0203093	-0.0851155	-0.0567561	-0.205104	0.136077	NO
O75368	SH3 domain-binding glutamic acid-rich-like protein	SH3BGRL	515500	467370	470790	369010	431270	565750	458670	441710	427290	443550	563853	482262	424154	417231	436588	1	0.906634	0.913269	0.715829	0.836605	1.0938	0.935522	0.822801	0.809372	0.846922	0.0937975	0.028888	-0.0904678	0.0935429	0.0103165	0.136077	NO
Q13823	Nucleolar GTP-binding protein 2	GNL2	80874	57933	51765	38980	32644	76790	51004	63091	50953	33193	76532.5	53627.4	60583.4	49753.5	32672	1	0.716337	0.64007	0.481984	0.40364	0.946317	0.663098	0.749108	0.615198	0.403987	-0.0536827	-0.0532384	0.109039	0.133214	0.000346367	0.135678	NO
Q76I76	Protein phosphatase Slingshot homolog 2	SSH2	33843	27783	27793	23760	21693	35247	28260	27863	24638	24185	35128.8	29713.6	26755.6	24058	23805.4	1	0.820938	0.821233	0.702065	0.640989	1.03799	0.877982	0.790579	0.710871	0.703407	0.0379928	0.0570445	-0.0306545	0.00880565	0.0624176	0.135606	NO
Q14684	Ribosomal RNA processing protein 1 homolog B	RRP1B	194970	170390	173020	139140	140230	197640	162990	181930	151670	155440	196977	171373	174699	148100	153000	1	0.873929	0.887419	0.713648	0.719239	1.01029	0.878973	0.89603	0.759602	0.784737	0.0102948	0.00504394	0.00861175	0.0459538	0.0654986	0.135403	NO
Q5THK1	Protein PRR14L	PRR14L	84081	75202	76160	64311	58038	88404	72190	78410	65731	66735	88107.5	75903.1	75293.5	64183.7	65687.5	1	0.894399	0.905793	0.76487	0.690263	1.04789	0.902738	0.895488	0.763355	0.781241	0.0478886	0.00833843	-0.0103052	-0.00151449	0.0909783	0.135386	NO
Q96DN5	TBC1 domain family member 31	TBC1D31	180500	146950	166810	121700	118000	182360	124610	177780	140410	139970	181748	131019	170714	137105	137773	1	0.814127	0.924155	0.674238	0.65374	1.00692	0.725869	0.945784	0.759583	0.763286	0.00691644	-0.0882585	0.0216287	0.0853445	0.109546	0.135177	NO
P84085	ADP-ribosylation factor 5	ARF5	167850	140140	142630	92146	85479	157080	143180	145110	113630	95029	156553	150544	139342	110955	93537.5	1	0.834912	0.849747	0.548978	0.509258	0.932697	0.896899	0.830161	0.661037	0.557268	-0.067303	0.0619868	-0.0195861	0.112059	0.0480098	0.135167	NO
Q9H6F5	Coiled-coil domain-containing protein 86	CCDC86	144750	138420	141820	136710	115300	166700	133060	142450	125780	133000	166141	139904	136788	122819	130912	1	0.956269	0.979758	0.944456	0.796546	1.14778	0.966521	0.944996	0.848491	0.904404	0.147778	0.0102519	-0.034762	-0.0959649	0.107858	0.135162	NO
P46821	Microtubule-associated protein 1B;MAP1B heavy chain;MAP1 light chain LC1	MAP1B	716610	654030	661850	544840	523100	754550	639060	668420	588550	565490	752019	671930	641853	574695	556614	1	0.912672	0.923585	0.760302	0.729965	1.04941	0.937651	0.89568	0.801964	0.776732	0.0494124	0.0249789	-0.0279049	0.0416618	0.0467677	0.134916	NO
Q15004	PCNA-associated factor	KIAA0101	36295	33763	32155	27145	24664	39893	32590	31812	27763	27667	39759.2	34266.3	30547.6	27109.4	27232.7	1	0.930238	0.885935	0.747899	0.679543	1.09545	0.944104	0.841648	0.74692	0.750317	0.0954459	0.0138661	-0.044287	-0.000979598	0.0707741	0.13482	NO
O75575	DNA-directed RNA polymerase III subunit RPC9	CRCP	7375.7	6720.3	6971.7	6402.2	4665.7	7738.4	7170.7	6563.2	5781.9	6023.4	7712.45	7539.53	6302.34	5645.79	5928.86	1	0.911141	0.945226	0.868013	0.632577	1.04566	1.02221	0.854473	0.765458	0.803837	0.0456564	0.111071	-0.0907521	-0.102554	0.171259	0.134681	NO
Q16875	6-phosphofructo-2-kinase/fructose-2,6-bisphosphatase 3;6-phosphofructo-2-kinase;Fructose-2,6-bisphosphatase	PFKFB3	123070	108330	104700	90569	73646	135650	108740	109740	88313	76957	135195	114333	105378	86234.1	75749.1	1	0.880231	0.850735	0.735915	0.598407	1.09852	0.929008	0.856247	0.700691	0.615496	0.0985217	0.0487776	0.00551139	-0.0352233	0.0170887	0.134676	NO
Q5JRA6	Melanoma inhibitory activity protein 3	MIA3	139170	126560	127940	104110	96869	150850	123700	131330	111650	99373	150344	130063	126110	109022	97813.3	1	0.909391	0.919307	0.748078	0.696048	1.08029	0.934559	0.906159	0.783371	0.702833	0.080291	0.0251673	-0.0131481	0.0352928	0.00678501	0.134388	NO
O75821	Eukaryotic translation initiation factor 3 subunit G	EIF3G	730940	657090	572590	411820	381950	827490	595920	586000	473440	382190	824715	626571	562709	462295	376191	1	0.898966	0.783361	0.563411	0.522546	1.12829	0.857213	0.769843	0.632466	0.514668	0.128293	-0.0417528	-0.0135183	0.0690549	-0.00787855	0.134199	NO
P54578	Ubiquitin carboxyl-terminal hydrolase 14	USP14	2549600	2180900	2305800	1742400	1905800	2680200	2102700	2234100	2080200	1999300	2.67121e+06	2.21085e+06	2.1453e+06	2.03123e+06	1.96792e+06	1	0.855389	0.904377	0.683401	0.74749	1.0477	0.867137	0.841428	0.796686	0.771854	0.0476982	0.011748	-0.0629496	0.113285	0.0243644	0.134146	NO
P19474	E3 ubiquitin-protein ligase TRIM21	TRIM21	62347	58909	56857	53529	41077	67855	58998	60408	52358	42963	67627.4	62032.6	58007	51125.5	42288.7	1	0.944857	0.911944	0.858566	0.658845	1.08469	0.994957	0.93039	0.820015	0.678279	0.0846943	0.0500998	0.0184457	-0.0385509	0.0194342	0.134123	NO
Q53F19	Uncharacterized protein C17orf85	C17orf85	22548	19216	16144	12051	9356.3	24160	16907	18391	13102	10186	24079	17776.6	17660	12793.6	10026.1	1	0.852226	0.715984	0.53446	0.41495	1.0679	0.78839	0.78322	0.567393	0.444657	0.0678985	-0.0638365	0.0672358	0.032933	0.0297066	0.133937	NO
O75152	Zinc finger CCCH domain-containing protein 11A	ZC3H11A	370320	333470	313270	249670	231480	373340	313640	317540	273780	278010	372088	329772	304919	267335	273646	1	0.900491	0.845944	0.674201	0.625081	1.00477	0.890506	0.823394	0.721903	0.738946	0.00477404	-0.00998563	-0.0225505	0.0477022	0.113865	0.133805	NO
Q8WXE1	ATR-interacting protein	ATRIP	44766	42625	37782	30824	30243	53902	39782	38821	33338	27275	53721.2	41828.2	37278	32553.2	26846.9	1	0.952174	0.843989	0.688558	0.67558	1.20005	0.934374	0.832731	0.727186	0.599716	0.200045	-0.0177994	-0.011258	0.0386277	-0.0758634	0.133752	NO
O00560	Syntenin-1	SDCBP	28590	24823	23009	21076	18443	31151	23491	24420	22321	19073	31046.5	24699.3	23449.4	21795.6	18773.6	1	0.868241	0.804792	0.737181	0.645086	1.08592	0.863913	0.820196	0.762349	0.65665	0.0859226	-0.00432797	0.0154042	0.025168	0.0115647	0.133732	NO
Q7Z4G4	tRNA (guanine(10)-N2)-methyltransferase homolog	TRMT11	48458	41506	38807	27635	21675	59465	40660	36614	27670	20685	59265.6	42751.4	35158.7	27018.6	20360.3	1	0.856536	0.800838	0.570288	0.447295	1.22303	0.882235	0.725551	0.557568	0.420165	0.22303	0.0256996	-0.075287	-0.0127196	-0.02713	0.133593	NO
Q92845	Kinesin-associated protein 3	KIFAP3	95033	75629	60665	45978	36713	101420	73233	64001	44946	43972	101080	76999.8	61457.2	43887.9	43281.8	1	0.795818	0.638357	0.483811	0.386318	1.06363	0.810242	0.646694	0.461818	0.45544	0.0636291	0.0144239	0.0083363	-0.0219929	0.0691215	0.133518	NO
Q9NQR4	Omega-amidase NIT2	NIT2	599860	528910	518190	426330	412510	615640	518090	541630	459070	446210	613575	544738	520102	448263	439206	1	0.881722	0.863852	0.710716	0.687677	1.02286	0.908109	0.86704	0.74728	0.732182	0.0228642	0.0263862	0.00318814	0.036564	0.0445044	0.133507	NO
P09104	Gamma-enolase	ENO2	375700	342530	330050	264630	274840	382310	330060	335090	296410	303380	381028	347037	321772	289432	298618	1	0.911711	0.878493	0.704365	0.731541	1.01418	0.923707	0.856459	0.770382	0.794832	0.0141811	0.0119954	-0.0220347	0.0660164	0.0632905	0.133449	NO
P61769	Beta-2-microglobulin;Beta-2-microglobulin form pI 5.3	B2M	38494	34302	31906	26732	19977	34590	41443	34964	25676	20170	34474	43574.6	33574.3	25071.6	19853.4	1	0.8911	0.828856	0.694446	0.518964	0.895568	1.13198	0.872196	0.651311	0.515754	-0.104432	0.240885	0.0433399	-0.0431347	-0.00321044	0.133448	NO
O95716	Ras-related protein Rab-3D	RAB3D	58623	53765	53596	42013	43275	60597	49471	54653	51831	44287	60393.8	52015.5	52480.8	50610.9	43591.9	1	0.917132	0.914249	0.716664	0.738191	1.03021	0.887289	0.895225	0.863328	0.743597	0.0302061	-0.0298424	-0.0190238	0.146664	0.00540545	0.133409	NO
Q14145	Kelch-like ECH-associated protein 1	KEAP1	299300	280540	242260	180250	155260	294210	273340	253780	204170	176600	293223	287399	243693	199364	173828	1	0.93732	0.809422	0.602239	0.518744	0.979697	0.960238	0.814211	0.6661	0.580782	-0.020303	0.0229178	0.00478881	0.0638615	0.0620385	0.133304	NO
Q9HBM1	Kinetochore protein Spc25	SPC25	309710	269370	252320	186870	190440	319350	268650	252800	215210	199390	318279	282468	242752	210144	196260	1	0.869749	0.814698	0.603371	0.614898	1.02767	0.91204	0.783805	0.678518	0.633691	0.0276678	0.0422914	-0.0308926	0.0751472	0.0187932	0.133007	NO
O15446	DNA-directed RNA polymerase I subunit RPA34	CD3EAP	129880	106960	127930	98924	95839	132350	107030	138100	104760	99013	131906	112535	132611	102294	97458.9	1	0.823529	0.984986	0.761657	0.737904	1.0156	0.866454	1.02103	0.787603	0.750377	0.0156001	0.042925	0.0360417	0.0259462	0.0124724	0.132985	NO
P78332	RNA-binding protein 6	RBM6	402810	352280	321520	271420	246130	440740	342660	331960	282950	256970	439262	360285	318766	276289	252937	1	0.874556	0.798193	0.673816	0.611032	1.09049	0.894429	0.791356	0.685905	0.62793	0.090494	0.0198723	-0.00683707	0.0120881	0.016898	0.132515	NO
P28715	DNA repair protein complementing XP-G cells	ERCC5	199450	196780	184910	185820	150520	207520	218380	206800	163180	151920	206824	229612	198581	159339	149536	1	0.986613	0.9271	0.931662	0.754675	1.03697	1.15123	0.995641	0.79889	0.749739	0.0369719	0.164615	0.0685413	-0.132772	-0.00493604	0.13242	NO
Q9BZE2	tRNA pseudouridine(38/39) synthase	PUS3	299480	258850	273150	225310	222450	332040	254760	267540	247580	224980	330926	267864	256906	241752	221449	1	0.864332	0.912081	0.752337	0.742787	1.105	0.894429	0.857842	0.807239	0.739444	0.105003	0.0300976	-0.0542394	0.0549013	-0.0033432	0.13242	NO
O00442	RNA 3-terminal phosphate cyclase	RTCA	498860	439770	455890	337240	308950	519610	418840	478590	376280	326610	517867	440383	459568	367422	321484	1	0.88155	0.913864	0.676021	0.619312	1.0381	0.882779	0.921236	0.736524	0.644437	0.0381016	0.001229	0.00737285	0.0605023	0.0251245	0.13233	NO
Q9P000	COMM domain-containing protein 9	COMMD9	111460	111170	87268	58419	45744	123640	109840	92288	57464	46075	123225	115490	88619.9	56111.3	45351.8	1	0.997398	0.782954	0.524125	0.410407	1.10556	1.03615	0.795083	0.503421	0.406889	0.105557	0.038755	0.0121293	-0.0207046	-0.00351857	0.132218	NO
O14526	F-BAR domain only protein 1	FCHO1	167990	155500	146910	113320	94164	172990	147360	153530	121910	107960	172410	154939	147428	119040	106265	1	0.92565	0.874516	0.674564	0.560533	1.02631	0.922314	0.877599	0.708615	0.63257	0.0263101	-0.0033366	0.00308242	0.0340507	0.072037	0.132144	NO
P62258	14-3-3 protein epsilon	YWHAE	2799900	2509800	2579100	2079900	2103100	2986900	2474800	2607100	2293500	2153000	2.97688e+06	2.60209e+06	2.50348e+06	2.23951e+06	2.11921e+06	1	0.896389	0.92114	0.742848	0.751134	1.06321	0.929352	0.894131	0.799854	0.756887	0.0632104	0.0329625	-0.0270086	0.0570056	0.00575275	0.131923	NO
Q01518	Adenylyl cyclase-associated protein 1	CAP1	1740200	1538200	1585900	1263700	1359500	1855200	1509400	1534400	1423300	1439600	1.84898e+06	1.58704e+06	1.47341e+06	1.38979e+06	1.417e+06	1	0.883921	0.911332	0.726181	0.781232	1.06251	0.911985	0.846692	0.798641	0.814277	0.062509	0.0280636	-0.0646397	0.07246	0.0330447	0.131438	NO
Q96L91	E1A-binding protein p400	EP400	99351	97540	87001	74462	68530	107420	89506	92110	79282	74057	107060	94109.8	88449	77415.7	72894.6	1	0.981772	0.875693	0.749484	0.689777	1.07759	0.947245	0.890268	0.779214	0.733708	0.077591	-0.0345265	0.0145747	0.0297296	0.0439313	0.1313	NO
Q9NZJ0	Denticleless protein homolog	DTL	59202	54124	52352	42495	39924	57091	54378	54415	45906	45418	56899.5	57174.9	52252.2	44825.4	44705.1	1	0.914226	0.884294	0.717797	0.674369	0.961108	0.96576	0.882609	0.757159	0.755129	-0.0388917	0.0515344	-0.00168528	0.0393627	0.0807596	0.13108	NO
P10746	Uroporphyrinogen-III synthase	UROS	128120	118460	110990	86803	75636	128160	119700	121750	95848	73840	127730	125857	116911	93591.7	72681	1	0.924602	0.866297	0.677513	0.590353	0.996957	0.982335	0.912511	0.7305	0.567289	-0.00304255	0.0577333	0.046214	0.052987	-0.0230641	0.130828	NO
Q9Y696	Chloride intracellular channel protein 4	CLIC4	501510	450530	441800	366510	320480	525440	434110	469530	387330	342620	523678	456439	450868	378212	337242	1	0.898347	0.88094	0.730813	0.63903	1.0442	0.910128	0.899021	0.754147	0.672454	0.0442022	0.0117815	0.0180816	0.0233337	0.0334237	0.130823	NO
O00754	Lysosomal alpha-mannosidase;Lysosomal alpha-mannosidase A peptide;Lysosomal alpha-mannosidase B peptide;Lysosomal alpha-mannosidase C peptide;Lysosomal alpha-mannosidase D peptide;Lysosomal alpha-mannosidase E peptide	MAN2B1	244110	236670	217510	190200	179920	247920	229950	225410	198670	204220	247089	241778	216451	193993	201015	1	0.969522	0.891033	0.779157	0.737045	1.0122	0.990445	0.886694	0.794696	0.823459	0.0122017	0.020923	-0.00433869	0.0155389	0.0864144	0.130739	NO
Q9HC44	Vasculin-like protein 1	GPBP1L1	4045.7	3521.4	2616.6	2349.3	2182.4	3202.2	3095.2	3641.4	2771.1	2637.2	3191.46	3254.4	3496.67	2705.87	2595.81	1	0.870406	0.646761	0.580691	0.539437	0.788853	0.80441	0.864293	0.668825	0.641621	-0.211147	-0.0659955	0.217532	0.0881348	0.102184	0.130708	NO
Q9NXV6	CDKN2A-interacting protein	CDKN2AIP	546060	500350	501780	390090	377960	542240	484520	517920	426750	430420	540421	509441	497335	416704	423664	1	0.916291	0.91891	0.714372	0.692158	0.989674	0.93294	0.91077	0.76311	0.775857	-0.0103258	0.016649	-0.00814047	0.0487384	0.0836982	0.130619	NO
Q9UL25	Ras-related protein Rab-21	RAB21	176490	159210	163630	122580	120250	181210	154640	165770	135960	132130	180602	162594	159181	132759	130056	1	0.902091	0.927135	0.694544	0.681342	1.0233	0.921264	0.901928	0.752221	0.736904	0.0233003	0.0191735	-0.0252064	0.0576771	0.0555619	0.130507	NO
Q9NTJ4	Alpha-mannosidase 2C1	MAN2C1	58489	51071	46466	37289	37740	59065	50587	47171	44059	38918	58866.9	53189	45296.1	43021.8	38307.2	1	0.873173	0.79444	0.637539	0.64525	1.00646	0.909384	0.774439	0.735554	0.654946	0.00646126	0.0362111	-0.0200012	0.0980155	0.00969677	0.130383	NO
Q5TKA1	Protein lin-9 homolog	LIN9	93304	89137	80747	68649	61475	99086	85458	87269	73173	62588	98753.7	89853.5	83800.4	71450.5	61605.6	1	0.95534	0.865418	0.735756	0.658868	1.05841	0.963019	0.898144	0.765781	0.660268	0.0584079	0.00767969	0.0327255	0.0300252	0.00140012	0.130238	NO
O00443	Phosphatidylinositol 4-phosphate 3-kinase C2 domain-containing subunit alpha	PIK3C2A	34065	29531	31005	24990	24503	34661	28281	32553	27668	26388	34544.8	29735.6	31259.2	27016.7	25973.8	1	0.866902	0.910172	0.733598	0.719301	1.01408	0.872909	0.917633	0.793092	0.762478	0.0140836	0.00600727	0.00746081	0.0594945	0.0431769	0.130223	NO
Q9Y4G8	Rap guanine nucleotide exchange factor 2	RAPGEF2	120690	111400	99599	79427	67377	129490	110620	113060	81178	61954	129056	116310	108566	79267	60981.6	1	0.923026	0.825246	0.658108	0.558265	1.06932	0.963707	0.899547	0.656782	0.505275	0.0693158	0.0406807	0.0743005	-0.00132546	-0.0529904	0.129981	NO
Q96B01	RAD51-associated protein 1	RAD51AP1	14534	14087	12761	10516	10336	15702	11984	13883	12728	10273	15649.3	12600.4	13331.2	12428.4	10111.8	1	0.969245	0.87801	0.723545	0.71116	1.07674	0.86696	0.917243	0.855124	0.695731	0.0767401	-0.102284	0.0392327	0.13158	-0.0154288	0.129839	NO
Q96FX7	tRNA (adenine(58)-N(1))-methyltransferase catalytic subunit TRMT61A	TRMT61A	97794	88007	75271	61010	60784	101230	84437	77543	68528	65521	100891	88780	74461	66914.8	64492.6	1	0.899922	0.769689	0.623862	0.621551	1.03166	0.907827	0.761406	0.684243	0.659474	0.0316635	0.00790468	-0.00828287	0.0603802	0.0379226	0.129588	NO
Q9UKB3	DnaJ homolog subfamily C member 12	DNAJC12	186750	177710	159280	138500	130470	192620	176630	170150	143660	137690	191974	185715	163387	140278	135529	1	0.951593	0.852905	0.741633	0.698635	1.02797	0.994458	0.874898	0.751155	0.725723	0.0279733	0.0428647	0.0219932	0.00952168	0.0270889	0.129442	NO
O60888	Protein CutA	CUTA	309080	264190	280120	229080	251470	350610	246430	261130	260620	264310	349434	259105	250751	254485	260161	1	0.854763	0.906303	0.741167	0.813608	1.13056	0.838311	0.811282	0.823362	0.841729	0.130562	-0.0164515	-0.0950202	0.0821952	0.0281204	0.129406	NO
Q14353	Guanidinoacetate N-methyltransferase	GAMT	349810	338500	320830	259000	290950	378770	327460	297500	304300	304520	377500	344303	285676	297137	299740	1	0.967668	0.917155	0.740402	0.831737	1.07916	0.984257	0.816659	0.849423	0.856866	0.0791564	0.0165889	-0.100496	0.109021	0.0251289	0.1294	NO
Q9P013	Spliceosome-associated protein CWC15 homolog	CWC15	245780	228430	227910	177040	183690	253160	227330	222560	198260	199130	252311	239023	213714	193593	196005	1	0.929408	0.927293	0.720319	0.747376	1.02657	0.972507	0.869534	0.787667	0.79748	0.0265724	0.0430985	-0.0577583	0.0673483	0.0501038	0.129365	NO
P55789	FAD-linked sulfhydryl oxidase ALR	GFER	37774	32367	34482	26687	28104	39657	29711	35655	31396	29099	39524	31239.2	34237.9	30656.9	28642.3	1	0.856859	0.91285	0.706491	0.744004	1.04633	0.827002	0.906387	0.811588	0.758254	0.0463282	-0.0298568	-0.00646316	0.105097	0.0142498	0.129355	NO
P00338	L-lactate dehydrogenase A chain	LDHA	2996600	2794900	2715700	2211000	2227800	3203500	2720500	2703400	2423900	2354100	3.19276e+06	2.86043e+06	2.59595e+06	2.36684e+06	2.31715e+06	1	0.93269	0.90626	0.737836	0.743443	1.06546	0.954558	0.866299	0.789842	0.77326	0.0654596	0.0218679	-0.0399616	0.0520057	0.0298174	0.129189	NO
P49773	Histidine triad nucleotide-binding protein 1	HINT1	557780	554210	551600	432520	489440	539640	542260	563350	511550	517170	537830	570151	540959	499508	509053	1	0.9936	0.98892	0.775431	0.877479	0.964234	1.02218	0.969843	0.895528	0.912641	-0.0357664	0.0285798	-0.0190771	0.120097	0.035162	0.128995	NO
Q86U90	YrdC domain-containing protein, mitochondrial	YRDC	266420	235260	231180	185860	184960	269860	225020	237500	210330	202220	268955	236594	228060	205379	199046	1	0.883042	0.867728	0.69762	0.694242	1.00951	0.888049	0.856018	0.770883	0.747114	0.00951493	0.0050069	-0.0117095	0.073263	0.0528715	0.128947	NO
P80303	Nucleobindin-2;Nesfatin-1	NUCB2	403680	351060	356980	272070	254550	400700	338860	391500	303290	266680	399356	356289	375939	296150	262494	1	0.869649	0.884314	0.673974	0.630574	0.989289	0.882603	0.931281	0.733627	0.650253	-0.010711	0.0129541	0.0469666	0.0596522	0.0196796	0.128542	NO
Q9Y3L3	SH3 domain-binding protein 1	SH3BP1	591840	540740	519240	435680	405050	654770	513050	541250	464860	409380	652574	539439	519738	453917	402954	1	0.913659	0.877332	0.736145	0.684391	1.10262	0.911461	0.878172	0.766959	0.68085	0.102619	-0.00219856	0.000840672	0.030814	-0.00354067	0.128535	NO
Q5ST30	Valine--tRNA ligase, mitochondrial	VARS2	45924	36677	19020	10342	12309	43020	37004	25888	12885	11101	42875.7	38907.3	24859.1	12581.7	10926.8	1	0.798646	0.414163	0.225198	0.26803	0.933623	0.847211	0.541309	0.273967	0.237931	-0.0663766	0.0485652	0.127146	0.0487693	-0.0300984	0.128006	NO
Q8TDY4	Arf-GAP with SH3 domain, ANK repeat and PH domain-containing protein 3	ASAP3	26827	24218	23059	20161	16486	30017	25098	24803	17523	17219	29916.3	26388.9	23817.2	17110.5	16948.7	1	0.902747	0.859544	0.751519	0.61453	1.11516	0.98367	0.887806	0.637809	0.631779	0.115158	0.0809229	0.0282619	-0.11371	0.0172489	0.127881	NO
O60499	Syntaxin-10	STX10	65488	59878	59314	49657	42925	72370	55429	60877	52782	45949	72127.3	58280	58457.4	51539.5	45227.8	1	0.914335	0.905723	0.758261	0.655464	1.10138	0.889934	0.892643	0.787007	0.690627	0.101382	-0.0244014	-0.0130804	0.0287455	0.0351637	0.127809	NO
P16401	Histone H1.5	HIST1H1B	299630	254910	296810	244560	301810	301670	231840	270800	291340	352580	300658	243765	260037	284482	347046	1	0.850749	0.990588	0.816207	1.00728	1.00343	0.813552	0.86786	0.949443	1.15825	0.00343185	-0.0371968	-0.122729	0.133237	0.150973	0.127716	NO
O14974	Protein phosphatase 1 regulatory subunit 12A	PPP1R12A	1546600	1317500	1296400	913670	848850	1578700	1307300	1333900	1046100	883850	1.57341e+06	1.37454e+06	1.28088e+06	1.02147e+06	869977	1	0.851869	0.838226	0.59076	0.548849	1.01733	0.88875	0.828193	0.660464	0.56251	0.0173319	0.0368817	-0.010033	0.0697041	0.0136605	0.127545	NO
Q15691	Microtubule-associated protein RP/EB family member 1	MAPRE1	647890	610810	590460	478580	515260	691970	592940	591200	528800	536870	689649	623438	567702	516352	528443	1	0.942768	0.911358	0.738675	0.795289	1.06445	0.962259	0.876232	0.796974	0.815638	0.0644544	0.0194909	-0.035126	0.0582997	0.0203483	0.127467	NO
P05937	Calbindin	CALB1	567780	522560	526880	430910	463190	573590	523340	522210	493080	486460	571666	550258	501454	481473	478825	1	0.920356	0.927965	0.758938	0.815791	1.00684	0.96914	0.883184	0.847992	0.843328	0.0068448	0.0487831	-0.0447809	0.0890533	0.0275365	0.127437	NO
Q96PE7	Methylmalonyl-CoA epimerase, mitochondrial	MCEE	23821	21377	22840	19562	17489	25851	21504	23124	19383	18904	25764.3	22610.1	22204.9	18926.7	18607.3	1	0.897401	0.958818	0.821208	0.734184	1.08158	0.949165	0.932157	0.794539	0.78113	0.0815794	0.0517636	-0.0266607	-0.0266691	0.0469455	0.126959	NO
Q9UNF0	Protein kinase C and casein kinase substrate in neurons protein 2	PACSIN2	708880	663970	639530	525910	508030	742810	639980	670020	561040	540360	740319	672897	643389	547833	531879	1	0.936647	0.90217	0.741889	0.716666	1.04435	0.94924	0.907614	0.772815	0.750308	0.04435	0.0125938	0.00544446	0.030926	0.0336427	0.126957	NO
O15379	Histone deacetylase 3	HDAC3	288850	252310	241950	182070	157810	301120	236000	254160	208250	166540	300110	248139	244058	203348	163926	1	0.873498	0.837632	0.630327	0.546339	1.03898	0.859057	0.844931	0.703991	0.567513	0.0389826	-0.0144411	0.00729855	0.0736635	0.0211737	0.126677	NO
Q9GZV4	Eukaryotic translation initiation factor 5A-2	EIF5A2	48810	39503	28526	17795	12521	53343	37972	33235	17646	11274	53164.1	39925.1	31914	17230.6	11097	1	0.809322	0.584429	0.364577	0.256525	1.08921	0.81797	0.653842	0.353014	0.227352	0.0892051	0.00864773	0.0694129	-0.0115631	-0.0291734	0.126529	NO
Q16543	Hsp90 co-chaperone Cdc37;Hsp90 co-chaperone Cdc37, N-terminally processed	CDC37	1394600	1257800	1277600	1009500	1058000	1437600	1243300	1279500	1131900	1117500	1.43278e+06	1.30725e+06	1.22865e+06	1.10525e+06	1.09996e+06	1	0.901907	0.916105	0.723863	0.75864	1.02738	0.937365	0.881002	0.792524	0.788728	0.0273761	0.0354577	-0.0351031	0.0686609	0.0300875	0.126479	NO
Q9UKG1	DCC-interacting protein 13-alpha	APPL1	652590	616830	589090	486150	458680	649990	628650	609750	504760	506600	647810	660985	585515	492878	498649	1	0.945203	0.902695	0.744955	0.702861	0.992676	1.01286	0.897217	0.755264	0.764107	-0.00732448	0.0676607	-0.00547825	0.0103092	0.061246	0.126413	NO
Q9NUU7	ATP-dependent RNA helicase DDX19A	DDX19A	1512600	1310500	1393400	1044100	1051700	1546000	1291400	1392300	1195700	1117900	1.54082e+06	1.35782e+06	1.33696e+06	1.16755e+06	1.10035e+06	1	0.866389	0.921195	0.690268	0.695293	1.01865	0.897675	0.883883	0.771885	0.727459	0.0186534	0.0312861	-0.037312	0.0816162	0.0321656	0.126409	NO
Q8NBF6	Late secretory pathway protein AVL9 homolog	AVL9	280620	243950	230340	179400	165970	301850	226470	241860	190300	181570	300838	238119	232247	185820	178720	1	0.869325	0.820825	0.639299	0.59144	1.07205	0.848544	0.827621	0.662177	0.636876	0.0720465	-0.0207807	0.00679589	0.0228788	0.0454356	0.126376	NO
Q9NQL2	Ras-related GTP-binding protein D	RRAGD	20008	16923	17813	13151	11931	20140	16372	19409	13263	13690	20072.5	17214.1	18637.6	12950.8	13475.1	1	0.845812	0.890294	0.657287	0.596311	1.00322	0.860361	0.931506	0.64728	0.673487	0.00322152	0.014549	0.0412121	-0.0100069	0.0771754	0.126151	NO
Q9H8Y8	Golgi reassembly-stacking protein 2	GORASP2	648480	617630	538440	374740	360910	667600	580400	551350	462550	370990	665361	610253	529436	451661	365167	1	0.952427	0.830311	0.577874	0.556548	1.02603	0.941051	0.816426	0.696492	0.563112	0.0260317	-0.0113759	-0.0138846	0.118618	0.00656465	0.125954	NO
Q969Q5	Ras-related protein Rab-24	RAB24	49345	40391	34998	24720	21702	48426	40533	38626	28546	21867	48263.6	42617.8	37090.8	27874	21523.8	1	0.818543	0.709251	0.500963	0.439801	0.978085	0.863671	0.751662	0.56488	0.43619	-0.0219152	0.0451276	0.0424111	0.0639176	-0.00361168	0.125929	NO
P00558	Phosphoglycerate kinase 1	PGK1	5068700	4459300	4574100	3604700	3822000	5233500	4349500	4565900	4096700	4056900	5.21595e+06	4.57322e+06	4.38442e+06	4.00026e+06	3.99322e+06	1	0.879772	0.902421	0.711169	0.754039	1.02905	0.902247	0.865	0.789209	0.78782	0.0290505	0.0224746	-0.037421	0.0780401	0.0337807	0.125925	NO
P09668	Pro-cathepsin H;Cathepsin H mini chain;Cathepsin H;Cathepsin H heavy chain;Cathepsin H light chain	CTSH	143490	142750	134020	107060	108350	130860	145290	140110	112410	128250	130421	152763	134541	109764	126237	1	0.994843	0.934002	0.746115	0.755105	0.908921	1.06462	0.937635	0.764958	0.879762	-0.0910786	0.069782	0.00363234	0.0188432	0.124657	0.125836	NO
O15062	Zinc finger and BTB domain-containing protein 5	ZBTB5	14312	12355	12970	9854.5	9500.2	14432	12650	12800	10439	10791	14383.6	13300.7	12291.3	10193.3	10621.6	1	0.863262	0.906233	0.688548	0.663793	1.005	0.929336	0.858807	0.712218	0.742148	0.00500274	0.0660743	-0.047425	0.0236697	0.0783558	0.125677	NO
Q6WKZ4	Rab11 family-interacting protein 1	RAB11FIP1	351950	303990	300470	247270	232310	376460	284110	315880	270460	242640	375197	298723	303325	264093	238832	1	0.863731	0.853729	0.702571	0.660065	1.06605	0.848766	0.861841	0.750371	0.678595	0.0660533	-0.0149645	0.00811215	0.0478001	0.0185299	0.125531	NO
Q02952	A-kinase anchor protein 12	AKAP12	39308	35806	38597	34380	30666	43220	36889	36128	34360	34122	43075.1	38786.4	34692.1	33551.1	33586.4	1	0.910909	0.981912	0.874631	0.780147	1.09583	0.98673	0.88257	0.853545	0.854443	0.0958342	0.0758215	-0.0993421	-0.0210861	0.0742961	0.125524	NO
P62256	Ubiquitin-conjugating enzyme E2 H	UBE2H	186280	164950	161830	116730	113870	178320	162040	164010	141380	125310	177722	170375	157491	138052	123343	1	0.885495	0.868746	0.626637	0.611284	0.954058	0.914615	0.845455	0.741099	0.662139	-0.0459418	0.0291204	-0.0232914	0.114461	0.0508545	0.125203	NO
Q8NI08	Nuclear receptor coactivator 7	NCOA7	11632	12321	11465	10117	8490	14612	11607	11588	9600.5	8343.2	14563	12204	11127.4	9374.5	8212.25	1	1.05923	0.985643	0.869756	0.729883	1.25198	1.04918	0.956622	0.805923	0.706005	0.251977	-0.0100578	-0.0290213	-0.0638326	-0.0238783	0.125187	NO
Q53FA7	Quinone oxidoreductase PIG3	TP53I3	123980	112390	118050	95889	91826	125810	112640	112090	104300	106000	125388	118434	107635	101845	104336	1	0.906517	0.95217	0.773423	0.740652	1.01136	0.955264	0.868163	0.821461	0.841557	0.0113572	0.048747	-0.0840064	0.0480378	0.100905	0.125041	NO
O43776	Asparagine--tRNA ligase, cytoplasmic	NARS	1228800	1205200	1214800	915190	953350	1214700	1159200	1249000	1028100	1054700	1.21063e+06	1.21882e+06	1.19936e+06	1.0039e+06	1.03815e+06	1	0.980794	0.988607	0.744784	0.775838	0.98521	0.991881	0.97604	0.816974	0.844845	-0.0147898	0.0110869	-0.0125672	0.0721908	0.0690069	0.124928	NO
Q9BRT2	Ubiquinol-cytochrome-c reductase complex assembly factor 2	UQCC2	47670	40843	37476	25279	24856	51537	36818	40209	30112	24370	51364.2	38711.7	38610.9	29403.1	23987.5	1	0.856786	0.786155	0.530292	0.521418	1.07749	0.812078	0.809961	0.616806	0.503199	0.0774944	-0.0447086	0.0238065	0.0865146	-0.0182191	0.124888	NO
Q15650	Activating signal cointegrator 1	TRIP4	99448	77128	66892	46899	42675	111800	71601	68235	51327	43785	111425	75283.8	65522.9	50118.7	43097.8	1	0.775561	0.672633	0.471593	0.429119	1.12044	0.757017	0.658866	0.503969	0.43337	0.120435	-0.0185443	-0.0137666	0.0323761	0.0042511	0.124752	NO
Q86U28	Iron-sulfur cluster assembly 2 homolog, mitochondrial	ISCA2	55407	50354	51618	43160	43672	55307	52108	51087	47595	46410	55121.5	54788.2	49056.5	46474.6	45681.6	1	0.908802	0.931615	0.778963	0.788204	0.994848	0.988831	0.885385	0.838786	0.824473	-0.00515249	0.0800293	-0.0462306	0.0598226	0.0362691	0.124738	NO
Q5T3J3	Ligand-dependent nuclear receptor-interacting factor 1	LRIF1	30998	33199	27205	27420	26838	39197	30062	28895	25923	26198	39065.5	31608.2	27746.5	25312.8	25786.8	1	1.071	0.877637	0.884573	0.865798	1.26026	1.01969	0.895108	0.816593	0.831886	0.26026	-0.051318	0.0174703	-0.0679799	-0.0339117	0.124521	NO
P20073	Annexin A7	ANXA7	943800	856490	876690	718470	730370	947170	857260	879940	783500	800510	943993	901353	844966	765056	787945	1	0.907491	0.928894	0.761252	0.773861	1.0002	0.955026	0.895281	0.810612	0.834865	0.000204982	0.0475348	-0.033613	0.0493601	0.0610038	0.124491	NO
O95429	BAG family molecular chaperone regulator 4	BAG4	133500	123880	122460	103410	100480	140280	122040	123990	107010	110380	139810	128317	119062	104491	108648	1	0.92794	0.917303	0.774607	0.752659	1.04726	0.961177	0.89185	0.782704	0.813839	0.0472625	0.0332371	-0.0254539	0.00809687	0.0611798	0.124322	NO
P62993	Growth factor receptor-bound protein 2	GRB2	782310	706610	700830	573860	583580	792790	690220	710530	625300	645810	790131	725722	682289	610580	635674	1	0.903235	0.895847	0.733546	0.74597	1.01	0.927665	0.872147	0.780484	0.81256	0.00999758	0.0244297	-0.0236999	0.0469381	0.0665894	0.124255	NO
O15382	Branched-chain-amino-acid aminotransferase, mitochondrial	BCAT2	552410	527940	478000	373190	451060	572810	499560	448000	450070	493000	570889	525255	430194	439475	485262	1	0.955703	0.865299	0.675567	0.816531	1.03345	0.950843	0.778758	0.79556	0.878445	0.0334515	-0.00486062	-0.0865411	0.119993	0.0619142	0.123957	NO
Q6ULP2	Aftiphilin	AFTPH	180190	166550	149190	114910	103650	191940	157410	158200	125600	107130	191296	165506	151912	122643	105449	1	0.924302	0.827959	0.637716	0.575226	1.06164	0.918511	0.843067	0.680633	0.585207	0.0616365	-0.00579162	0.0151074	0.0429176	0.00998123	0.123851	NO
P32121	Beta-arrestin-2	ARRB2	40196	35321	31389	22462	17685	40365	35294	36997	22646	17324	40229.6	37109.4	35526.5	22112.9	17052.1	1	0.878719	0.780899	0.558812	0.439969	1.00084	0.92321	0.883832	0.550127	0.424223	0.000836583	0.0444908	0.102934	-0.00868489	-0.0157457	0.123831	NO
Q6UWP2	Dehydrogenase/reductase SDR family member 11	DHRS11	277190	258150	247190	195600	202450	248560	260570	256750	211820	243630	247726	273972	246545	206834	239806	1	0.931311	0.891771	0.705653	0.730365	0.893706	0.988392	0.889445	0.74618	0.865132	-0.106294	0.0570816	-0.00232604	0.0405269	0.134767	0.123756	NO
Q12797	Aspartyl/asparaginyl beta-hydroxylase	ASPH	82245	89583	78431	79321	71238	101260	88034	80733	76972	65839	100920	92562	77524.2	75160	64805.6	1	1.08922	0.953626	0.964448	0.866168	1.22707	1.12544	0.942601	0.913855	0.787958	0.22707	0.0362216	-0.0110256	-0.0505922	-0.0782101	0.123464	NO
P30043	Flavin reductase (NADPH)	BLVRB	937970	876480	859760	677000	572200	1031100	847460	854490	757880	568860	1.02764e+06	891049	820528	740039	559931	1	0.934444	0.916618	0.721771	0.610041	1.0956	0.949976	0.874791	0.78898	0.596961	0.0956022	0.0155327	-0.041827	0.0672081	-0.01308	0.123436	NO
Q8NEY1	Neuron navigator 1	NAV1	39155	39115	36833	26386	39640	37590	39912	36132	34741	38515	37463.9	41964.9	34695.9	33923.2	37910.5	1	0.998978	0.940697	0.673886	1.01239	0.956811	1.07176	0.886117	0.866382	0.968216	-0.043189	0.0727846	-0.0545805	0.192496	-0.0441711	0.12334	NO
Q13362	Serine/threonine-protein phosphatase 2A 56 kDa regulatory subunit gamma isoform	PPP2R5C	115330	111740	89685	64985	52506	129520	105010	97470	67017	50703	129086	110411	93596	65439.4	49907.2	1	0.968872	0.777638	0.56347	0.455267	1.11927	0.95735	0.811549	0.56741	0.432734	0.119272	-0.0115217	0.0339111	0.00393989	-0.0225338	0.123067	NO
Q9BY32	Inosine triphosphate pyrophosphatase	ITPA	290470	248630	263810	203070	220920	311620	239680	269130	224910	225550	310575	252008	258433	219616	222010	1	0.855958	0.908218	0.699108	0.76056	1.06922	0.867587	0.889707	0.75607	0.764312	0.0692151	0.0116294	-0.0185107	0.0569612	0.00375196	0.123047	NO
Q8WVV4	Protein POF1B	POF1B	22535	19179	17373	16029	7262.1	26736	18048	20932	13106	6736.3	26646.3	18976.3	20100	12797.5	6630.57	1	0.851076	0.770934	0.711294	0.322259	1.18244	0.842081	0.891948	0.567893	0.294234	0.182442	-0.00899482	0.121014	-0.1434	-0.0280245	0.123036	NO
P60002	Transcription elongation factor 1 homolog	ELOF1	49672	46574	44126	24284	15374	56127	47151	42370	28334	12463	55938.8	49576.2	40686	27667	12267.4	1	0.937631	0.888348	0.488887	0.30951	1.12616	0.998072	0.819093	0.556994	0.246968	0.126163	0.0604409	-0.069255	0.0681069	-0.0625426	0.122913	NO
Q9BYB4	Guanine nucleotide-binding protein subunit beta-like protein 1	GNB1L	324830	306410	274700	224330	210640	330630	299820	296100	235550	225260	329521	315241	284331	230005	221724	1	0.943293	0.845673	0.690607	0.648462	1.01444	0.970481	0.875323	0.708078	0.682586	0.0144419	0.0271874	0.0296501	0.0174708	0.0341236	0.122874	NO
Q9H7E2	Tudor domain-containing protein 3	TDRD3	39147	38094	37605	30874	28839	43492	37965	37856	32714	28231	43346.1	39917.7	36351.4	31943.9	27787.9	1	0.973101	0.96061	0.788668	0.736685	1.10727	1.01969	0.928587	0.815999	0.709835	0.107266	0.0465869	-0.0320234	0.0273302	-0.0268502	0.122309	NO
Q96FV2	Secernin-2	SCRN2	163300	140460	134060	102480	90287	173050	133470	135720	119620	92063	172470	140335	130326	116804	90618	1	0.860135	0.820943	0.627557	0.55289	1.05615	0.85937	0.798075	0.715273	0.554917	0.0561521	-0.000765154	-0.0228678	0.0877164	0.00202698	0.122263	NO
Q9UNZ2	NSFL1 cofactor p47	NSFL1C	619150	535010	533670	419000	397430	614060	527550	564790	454590	433650	612001	554685	542342	443889	426844	1	0.864104	0.86194	0.676734	0.641896	0.988453	0.895881	0.875946	0.716932	0.689402	-0.0115471	0.0317768	0.0140062	0.0401982	0.0475063	0.12194	NO
Q86VQ1	Glucocorticoid-induced transcript 1 protein	GLCCI1	72789	63221	67069	54025	49167	72453	65978	69607	56773	52105	72210	69371.6	66840.4	55436.5	51287.2	1	0.868552	0.921417	0.742214	0.675473	0.992046	0.95305	0.918276	0.761606	0.704601	-0.00795432	0.0844989	-0.00314047	0.0193922	0.0291277	0.121924	NO
Q9UIJ7	GTP:AMP phosphotransferase AK3, mitochondrial	AK3	709790	649920	633090	488900	503660	679050	636410	653010	539920	580800	676773	669144	627056	527210	571684	1	0.915651	0.89194	0.688795	0.70959	0.953483	0.942735	0.883438	0.742769	0.805427	-0.0465171	0.0270839	-0.00850175	0.0539737	0.0958367	0.121875	NO
Q96B54	Zinc finger protein 428	ZNF428	51406	43280	38429	34521	26916	55548	39270	42536	34269	30334	55361.7	41289.9	40845.4	33462.3	29857.9	1	0.841925	0.747559	0.671536	0.523596	1.07695	0.803211	0.794564	0.650941	0.580825	0.0769503	-0.0387142	0.0470056	-0.020595	0.0572285	0.121875	NO
Q9BS26	Endoplasmic reticulum resident protein 44	ERP44	780360	681520	662620	478920	423020	796510	655560	695160	556430	434370	793839	689279	667530	543331	427552	1	0.873341	0.849121	0.613717	0.542083	1.01727	0.883283	0.855413	0.696257	0.547891	0.0172725	0.00994263	0.00629229	0.0825406	0.0058079	0.121856	NO
Q969Q6	Serine/threonine-protein phosphatase 2A regulatory subunit B subunit gamma	PPP2R3C	18834	17758	16399	19148	13027	22048	17356	20126	15069	13408	21974.1	18248.7	19326.1	14714.3	13197.6	1	0.942869	0.870713	1.01667	0.691675	1.16672	0.968924	1.02613	0.781261	0.70073	0.166723	0.0260544	0.155414	-0.235411	0.00905553	0.121836	NO
Q13501	Sequestosome-1	SQSTM1	56422	44941	40043	28527	26958	55210	43871	45684	31864	28065	55024.8	46127.5	43868.2	31113.9	27624.5	1	0.796516	0.709705	0.505601	0.477792	0.975237	0.817545	0.777503	0.55145	0.489605	-0.0247627	0.0210292	0.0677971	0.0458492	0.0118128	0.121726	NO
O60234	Glia maturation factor gamma	GMFG	171320	145560	156840	125400	131090	180130	144370	151400	143470	136390	179526	151796	145382	140093	134249	1	0.849638	0.91548	0.731964	0.765176	1.0479	0.886036	0.848602	0.817725	0.783617	0.0478981	0.0363979	-0.0668779	0.0857614	0.0184407	0.12162	NO
P13716	Delta-aminolevulinic acid dehydratase	ALAD	248100	229000	211050	159370	181300	247130	213280	212570	189980	201980	246301	224250	204121	185508	198810	1	0.923015	0.850665	0.642362	0.730754	0.99275	0.90387	0.822738	0.747714	0.801329	-0.00725032	-0.0191451	-0.0279274	0.105352	0.0705755	0.121604	NO
P31350	Ribonucleoside-diphosphate reductase subunit M2	RRM2	640020	575030	588230	456540	461420	656160	550370	591250	511170	507510	653959	578678	567750	499137	499544	1	0.898456	0.919081	0.713321	0.720946	1.02178	0.904157	0.887082	0.779877	0.780514	0.0217797	0.0057004	-0.0319986	0.0665554	0.0595673	0.121604	NO
P15531	Nucleoside diphosphate kinase A	NME1	1670200	1505800	1544200	1190900	1275100	1791400	1443100	1516200	1315800	1366200	1.78539e+06	1.51733e+06	1.45594e+06	1.28483e+06	1.34476e+06	1	0.901569	0.92456	0.713028	0.763442	1.06897	0.90847	0.871714	0.769264	0.805147	0.0689691	0.00690101	-0.0528456	0.056236	0.0417055	0.120966	NO
Q9Y266	Nuclear migration protein nudC	NUDC	2347100	1995700	2059000	1600100	1619500	2417100	1948900	2121800	1800300	1677600	2.40899e+06	2.04914e+06	2.03747e+06	1.75792e+06	1.65127e+06	1	0.850283	0.877253	0.681735	0.69	1.02637	0.873053	0.868079	0.748975	0.703536	0.0263703	0.0227694	-0.00917422	0.0672405	0.0135354	0.120741	NO
Q9UGK8	Secretion-regulating guanine nucleotide exchange factor	SERGEF	95175	86502	86853	71574	76547	93558	84382	88721	82446	81750	93244.2	88722.2	85194.7	80505.2	80466.9	1	0.908873	0.912561	0.752025	0.804276	0.979714	0.932201	0.895137	0.845865	0.845462	-0.0202865	0.0233276	-0.0174236	0.0938396	0.041186	0.120643	NO
Q9UGU0	Transcription factor 20	TCF20	88877	82722	84143	70649	69135	99197	80596	84581	74713	69537	98864.3	84741.5	81219.3	72954.2	68445.6	1	0.930747	0.946735	0.794908	0.777873	1.11237	0.953469	0.913839	0.820845	0.770116	0.112372	0.0227221	-0.0328965	0.0259372	-0.00775716	0.120378	NO
Q16626	Male-enhanced antigen 1	MEA1	18602	15245	17267	14137	13411	19070	15368	17234	14848	14922	19006	16158.5	16549	14498.5	14687.8	1	0.819536	0.928234	0.759972	0.720944	1.02172	0.868641	0.889637	0.779404	0.789581	0.0217205	0.0491052	-0.038597	0.0194318	0.0686372	0.120298	NO
O60825	6-phosphofructo-2-kinase/fructose-2,6-bisphosphatase 2;6-phosphofructo-2-kinase;Fructose-2,6-bisphosphatase	PFKFB2	361480	326200	322620	269990	236010	377610	325060	339600	289080	236990	376344	341780	326102	282275	233270	1	0.902401	0.892498	0.746902	0.652899	1.04112	0.9455	0.902131	0.780887	0.64532	0.0411187	0.0430992	0.00963345	0.0339851	-0.0075792	0.120257	NO
P60660	Myosin light polypeptide 6	MYL6	502950	456040	403750	300980	288960	512560	443180	427130	329290	309390	510841	465975	410153	321538	304534	1	0.90673	0.802764	0.598429	0.57453	1.01569	0.926484	0.815495	0.639305	0.605495	0.0156895	0.0197535	0.0127316	0.0408755	0.0309651	0.120015	NO
Q8TCZ2	CD99 antigen-like protein 2	CD99L2	9200.5	7838.3	8307.6	7518.5	4225.4	9662.3	7794.8	10701	6045.7	4254.2	9629.9	8195.73	10275.7	5903.38	4187.43	1	0.851943	0.902951	0.817184	0.459258	1.04667	0.890791	1.11686	0.641637	0.45513	0.0466709	0.0388486	0.21391	-0.175547	-0.00412724	0.119755	NO
Q8N7B6	PACRG-like protein	PACRGL	10864	8914	9753.5	7491.5	6101.8	9985.1	9618.1	9663	8598.5	6789.9	9951.61	10112.8	9278.94	8396.09	6683.33	1	0.820508	0.897782	0.689571	0.561653	0.916017	0.930855	0.854099	0.772836	0.615181	-0.0839826	0.110347	-0.0436823	0.0832646	0.053528	0.119475	NO
Q9NQT8	Kinesin-like protein KIF13B	KIF13B	216000	196590	185420	155790	141730	222800	194440	201240	168880	138870	222053	204441	193242	164904	136690	1	0.910139	0.858426	0.72125	0.656157	1.02802	0.946486	0.894637	0.763447	0.632826	0.0280222	0.0363475	0.0362108	0.0421967	-0.0233318	0.119445	NO
Q6PH81	UPF0547 protein C16orf87	C16orf87	4779.3	3791.2	4007	2917.6	3398.5	5678.3	3197.1	4114.4	3251.8	3370.3	5659.26	3361.54	3950.87	3175.25	3317.4	1	0.793254	0.838407	0.610466	0.711087	1.18412	0.703355	0.826663	0.664376	0.694119	0.184118	-0.0898995	-0.0117445	0.0539098	-0.0169689	0.119415	NO
Q8NHZ8	Anaphase-promoting complex subunit CDC26	CDC26	94251	74696	67898	42121	38084	95549	70387	73466	46001	44281	95228.6	74007.4	70546	44918.1	43586	1	0.792522	0.720396	0.446902	0.40407	1.01037	0.785216	0.748491	0.47658	0.462446	0.0103718	-0.00730638	0.0280955	0.0296773	0.0583758	0.119214	NO
P78356	Phosphatidylinositol 5-phosphate 4-kinase type-2 beta	PIP4K2B	123730	95010	77711	50292	56121	128300	97786	91074	54971	46520	127870	102816	87454.2	53677	45789.8	1	0.767882	0.628069	0.406466	0.453576	1.03346	0.830968	0.706815	0.433823	0.370079	0.0334577	0.0630861	0.0787455	0.0273576	-0.0834977	0.119149	NO
Q9BU02	Thiamine-triphosphatase	THTPA	36431	32031	31977	26584	25249	41324	28957	32799	28191	26370	41185.4	30446.4	31495.4	27527.4	25956.1	1	0.879224	0.877741	0.729708	0.693064	1.1305	0.835728	0.864521	0.755603	0.712473	0.130505	-0.0434957	-0.0132202	0.0258947	0.0194094	0.119093	NO
P33316	Deoxyuridine 5-triphosphate nucleotidohydrolase, mitochondrial	DUT	525090	497180	411340	340640	414570	509560	483980	426250	368290	473120	507851	508874	409308	359620	465694	1	0.946847	0.78337	0.648727	0.789522	0.96717	0.969117	0.779501	0.684874	0.886884	-0.0328304	0.0222697	-0.0038692	0.0361467	0.0973624	0.119079	NO
Q15382	GTP-binding protein Rheb	RHEB	389130	323350	254210	200690	170230	383990	302880	288560	220110	193680	382702	318459	277091	214929	190640	1	0.830956	0.653278	0.51574	0.437463	0.983482	0.818386	0.712078	0.552331	0.489914	-0.0165184	-0.0125699	0.0588002	0.0365906	0.0524505	0.118753	NO
Q13573	SNW domain-containing protein 1	SNW1	584890	521800	516670	393240	415120	618400	506070	513300	448500	428560	616326	532100	492898	437942	421833	1	0.892134	0.883363	0.672332	0.70974	1.05375	0.909743	0.84272	0.74876	0.721218	0.053747	0.0176098	-0.0406428	0.0764282	0.0114781	0.11862	NO
Q9H9Q2	COP9 signalosome complex subunit 7b	COPS7B	165930	148140	145270	119050	126560	181850	137160	141750	133350	134860	181240	144215	136116	130211	132743	1	0.892786	0.87549	0.717471	0.762731	1.09227	0.869131	0.820322	0.784734	0.799996	0.0922686	-0.0236555	-0.0551677	0.0672626	0.0372644	0.117972	NO
Q8NBF2	NHL repeat-containing protein 2	NHLRC2	466360	417660	419630	329430	317390	480300	400050	428500	374490	334270	478689	420627	411469	365674	329023	1	0.895574	0.899798	0.706386	0.680569	1.02644	0.901935	0.882299	0.784103	0.705514	0.0264371	0.00636125	-0.0174996	0.0777175	0.0249451	0.117961	NO
Q16719	Kynureninase	KYNU	359490	326570	310270	238320	244830	355190	311510	334480	268610	260930	353999	327533	321186	262287	256835	1	0.908426	0.863084	0.662939	0.681048	0.984725	0.911103	0.893448	0.729608	0.714441	-0.015275	0.00267759	0.0303647	0.0666689	0.0333932	0.117829	NO
Q7L523	Ras-related GTP-binding protein A;Ras-related GTP-binding protein B	RRAGA;RRAGB	180340	167760	155150	108130	109130	163210	163520	164300	127700	126690	162663	171931	157770	124694	124702	1	0.930243	0.860319	0.59959	0.605135	0.901978	0.95337	0.874846	0.691438	0.69148	-0.0980224	0.0231267	0.0145267	0.0918481	0.0863453	0.117824	NO
Q7Z3B4	Nucleoporin p54	NUP54	646280	578250	577310	460960	460340	649580	563020	592060	501450	509730	647401	591979	568528	489646	501729	1	0.894736	0.893282	0.713251	0.712292	1.00174	0.915979	0.879693	0.757637	0.776334	0.00173531	0.0212431	-0.0135885	0.0443858	0.0640426	0.117818	NO
Q12769	Nuclear pore complex protein Nup160	NUP160	161980	132510	86402	58335	46439	175450	113460	102130	60871	53923	174862	119296	98070.8	59438.1	53076.6	1	0.818064	0.533412	0.360137	0.286696	1.07953	0.736485	0.60545	0.366947	0.327674	0.0795258	-0.081579	0.0720382	0.0068099	0.0409781	0.117773	NO
P31946	14-3-3 protein beta/alpha;14-3-3 protein beta/alpha, N-terminally processed	YWHAB	440420	388680	414290	328530	327480	446780	389410	428050	362590	336740	445282	409439	411037	354054	331455	1	0.882521	0.94067	0.745947	0.743563	1.01104	0.929657	0.933284	0.803902	0.752588	0.0110386	0.0471354	-0.00738664	0.0579548	0.00902462	0.117767	NO
Q93075	Putative deoxyribonuclease TATDN2	TATDN2	15071	14054	13114	12670	10995	14896	14449	14558	12295	11840	14846	15192.2	13979.4	12005.6	11654.2	1	0.932519	0.870148	0.840687	0.729547	0.985074	1.00804	0.927568	0.796601	0.773284	-0.0149265	0.0755216	0.0574202	-0.0440867	0.0437372	0.117666	NO
O00625	Pirin	PIR	403010	375900	368370	292590	303040	412310	354620	368880	332230	333060	410927	372860	354219	324409	327832	1	0.932731	0.914047	0.726012	0.751942	1.01965	0.925188	0.878932	0.804965	0.81346	0.0196452	-0.0075434	-0.0351144	0.0789537	0.061518	0.117459	NO
Q8N4T8	Carbonyl reductase family member 4	CBR4	102710	95370	96903	74203	77570	109820	88130	94211	85640	83932	109452	92663	90466.5	83624	82614.6	1	0.928537	0.943462	0.722452	0.755233	1.06564	0.902181	0.880795	0.814176	0.804348	0.0656382	-0.026356	-0.0626667	0.0917242	0.0491152	0.117455	NO
P09525	Annexin A4	ANXA4	525600	494040	478850	398650	397280	545770	491040	489280	413110	429430	543940	516297	469833	403385	422690	1	0.939954	0.911054	0.758467	0.75586	1.03489	0.9823	0.893899	0.767476	0.804204	0.0348928	0.0423454	-0.0171554	0.00900911	0.0483443	0.117436	NO
Q00577	Transcriptional activator protein Pur-alpha	PURA	333500	338910	319370	247480	246140	306870	336290	341160	285540	262830	305841	353587	327600	278818	258705	1	1.01622	0.957631	0.742069	0.738051	0.917064	1.06023	0.98231	0.836037	0.775726	-0.082936	0.0440094	0.0246785	0.0939678	0.0376752	0.117395	NO
Q8TEL6	Short transient receptor potential channel 4-associated protein	TRPC4AP	67604	62753	65844	50447	43311	67966	64152	69599	51406	46392	67738.1	67451.7	66832.7	50195.9	45663.8	1	0.928244	0.973966	0.746213	0.640657	1.00198	0.997747	0.988591	0.742499	0.675461	0.00198304	0.0695028	0.0146253	-0.00371461	0.0348033	0.1172	NO
Q9UBB4	Ataxin-10	ATXN10	770200	724810	691080	542800	546100	759760	709630	720320	588290	605260	757212	746130	691690	574441	595760	1	0.941067	0.897273	0.704752	0.709037	0.983137	0.968748	0.898066	0.745834	0.773513	-0.0168632	0.027681	0.000792325	0.041082	0.0644768	0.117169	NO
Q86W34	Archaemetzincin-2	AMZ2	135090	126470	125740	110610	109330	148710	123070	124830	118060	112050	148211	129400	119869	115281	110291	1	0.936191	0.930787	0.818787	0.809312	1.09713	0.957881	0.887323	0.853363	0.816428	0.0971298	0.0216902	-0.0434635	0.0345755	0.00711596	0.117048	NO
Q96ST2	Protein IWS1 homolog	IWS1	330930	321210	285580	221900	206190	328600	320940	307150	237430	216180	327498	337448	294942	231841	212787	1	0.970628	0.862962	0.670535	0.623062	0.989629	1.01969	0.891252	0.700573	0.642997	-0.0103709	0.0490666	0.0282901	0.0300389	0.0199344	0.116959	NO
P12277	Creatine kinase B-type	CKB	1825300	1516700	900120	361450	296540	1979200	1389700	1084700	371310	280070	1.97256e+06	1.46118e+06	1.04159e+06	362569	275674	1	0.830932	0.493135	0.198022	0.162461	1.08068	0.800515	0.570639	0.198635	0.151029	0.0806784	-0.0304172	0.0775038	0.00061315	-0.0114315	0.116947	NO
P18440	Arylamine N-acetyltransferase 1	NAT1	73125	57498	26573	18475	11852	84669	53398	32575	14594	10154	84385	56144.5	31280.3	14250.5	9994.63	1	0.786297	0.363391	0.25265	0.162079	1.15398	0.767789	0.427764	0.194878	0.136679	0.153984	-0.0185089	0.064373	-0.0577716	-0.0254	0.116676	NO
O96007	Molybdopterin synthase catalytic subunit	MOCS2	203100	172320	180130	134210	134870	205480	166040	181910	157520	142640	204791	174580	174680	153812	140401	1	0.848449	0.886903	0.660807	0.664057	1.00833	0.859578	0.860068	0.757321	0.691291	0.00832535	0.011129	-0.0268349	0.0965136	0.0272337	0.116367	NO
P23327	Sarcoplasmic reticulum histidine-rich calcium-binding protein	HRC	21293	15400	16769	14190	12797	24728	16440	16928	14305	10944	24645.1	17285.6	16255.2	13968.3	10772.2	1	0.723242	0.787536	0.666416	0.600996	1.15743	0.811797	0.763405	0.656002	0.505905	0.157426	0.0885546	-0.0241309	-0.0104141	-0.0950911	0.116345	NO
Q9UNW1	Multiple inositol polyphosphate phosphatase 1	MINPP1	302480	270610	277940	217790	231010	303230	257030	270210	256140	256960	302213	270250	259470	250110	252927	1	0.894638	0.918871	0.720015	0.76372	0.999117	0.893449	0.85781	0.826866	0.836177	-0.000882528	-0.00118891	-0.061061	0.106851	0.0724571	0.116176	NO
P26374	Rab proteins geranylgeranyltransferase component A 2	CHML	573680	513840	511740	419350	391980	585470	502200	523580	449210	431010	583507	528031	502770	438635	424245	1	0.895691	0.89203	0.730982	0.683273	1.01713	0.920427	0.876394	0.764599	0.739515	0.0171289	0.0247363	-0.0156362	0.033617	0.0562421	0.116088	NO
Q6P2P2	Putative protein arginine N-methyltransferase 9	PRMT9	175920	167740	150660	118550	98893	187680	166280	154150	135450	91442	187051	174833	148023	132261	90006.8	1	0.953502	0.856412	0.673886	0.562148	1.06327	0.993819	0.841423	0.751827	0.511635	0.0632707	0.0403174	-0.0149888	0.0779413	-0.050513	0.116028	NO
O15347	High mobility group protein B3	HMGB3	378190	342880	353370	282760	296240	384580	332270	352220	310370	328530	383290	349360	338221	303064	323373	1	0.906634	0.934372	0.747667	0.78331	1.01349	0.923769	0.894314	0.801353	0.855056	0.0134859	0.0171352	-0.0400574	0.0536866	0.0717456	0.115996	NO
Q5SVZ6	Zinc finger MYM-type protein 1	ZMYM1	23845	22311	19090	15975	12957	26493	21522	21620	14914	12787	26404.2	22629	20760.7	14562.9	12586.3	1	0.935668	0.800587	0.669952	0.543384	1.10732	0.949003	0.870652	0.610733	0.527838	0.107324	0.0133356	0.0700648	-0.0592192	-0.0155463	0.115959	NO
Q14207	Protein NPAT	NPAT	137220	129230	121190	99608	106520	144220	120870	124230	111530	112390	143736	127087	119292	108905	110626	1	0.941772	0.88318	0.7259	0.776272	1.04749	0.926155	0.869351	0.793649	0.806194	0.0474882	-0.0156175	-0.0138291	0.0677491	0.0299224	0.115713	NO
Q96T23	Remodeling and spacing factor 1	RSF1	67380	63271	64180	55414	51457	62331	69512	69179	55821	54195	62122	73087.4	66429.4	54506.9	53344.4	1	0.939018	0.952508	0.82241	0.763684	0.921964	1.0847	0.985892	0.808948	0.791694	-0.0780356	0.145687	0.0333841	-0.0134618	0.0280108	0.115584	NO
Q8TCA0	Leucine-rich repeat-containing protein 20	LRRC20	118930	106280	105620	89081	93337	123460	108010	106610	96727	95051	123046	113566	102373	94450	93559.1	1	0.893635	0.888085	0.74902	0.784806	1.03461	0.954894	0.860781	0.794165	0.786674	0.0346082	0.0612588	-0.0273044	0.0451442	0.00186754	0.115574	NO
O95721	Synaptosomal-associated protein 29	SNAP29	577810	537940	517940	413340	403950	579960	527760	552730	424710	446360	578015	554905	530761	414712	439354	1	0.930998	0.896385	0.715356	0.699105	1.00035	0.96036	0.918574	0.717731	0.760378	0.000354753	0.0293616	0.0221894	0.00237469	0.0612728	0.115553	NO
P48163	NADP-dependent malic enzyme	ME1	532270	514670	491880	410430	418710	540430	493090	503210	437910	468920	538618	518452	483209	427601	461560	1	0.966934	0.924117	0.771094	0.78665	1.01193	0.97404	0.907828	0.803354	0.867154	0.0119254	0.00710572	-0.0162897	0.0322607	0.0805042	0.115506	NO
P34931	Heat shock 70 kDa protein 1-like	HSPA1L	19795	15847	17175	15093	12950	22051	15675	17484	15307	13158	21977	16481.2	16789.1	14946.7	12951.5	1	0.800556	0.867643	0.762465	0.654206	1.11023	0.832596	0.848148	0.755073	0.65428	0.110232	0.0320407	-0.0194957	-0.00739248	7.45525e-05	0.115459	NO
P17029	Zinc finger protein with KRAB and SCAN domains 1	ZKSCAN1	77100	67929	68086	50677	55582	76562	66454	68053	61440	57655	76305.2	69872.1	65348.2	59993.7	56750.1	1	0.881051	0.883087	0.657289	0.720908	0.989692	0.906253	0.847577	0.778128	0.736058	-0.0103083	0.025202	-0.0355101	0.120839	0.01515	0.115372	NO
P54802	Alpha-N-acetylglucosaminidase;Alpha-N-acetylglucosaminidase 82 kDa form;Alpha-N-acetylglucosaminidase 77 kDa form	NAGLU	210020	205140	184430	148920	151710	212880	202080	192550	156320	164830	212166	212474	184897	152640	162243	1	0.976764	0.878154	0.709075	0.72236	1.01022	1.01168	0.880378	0.726789	0.772512	0.0102184	0.0349206	0.00222327	0.0177133	0.0501518	0.115227	NO
Q7L591	Docking protein 3	DOK3	462970	407150	396080	310630	308970	486360	385500	409000	343060	326450	484729	405328	392744	334984	321326	1	0.879431	0.85552	0.670951	0.667365	1.047	0.875496	0.848314	0.723555	0.694054	0.0469985	-0.00393491	-0.00720579	0.0526043	0.0266888	0.115151	NO
Q96A49	Synapse-associated protein 1	SYAP1	764450	670320	696160	510690	539290	786310	664910	690640	588010	557500	783673	699110	663190	574168	548750	1	0.876866	0.910668	0.668049	0.705461	1.02515	0.914526	0.867539	0.751086	0.717836	0.0251461	0.0376607	-0.0431292	0.0830374	0.0123744	0.11509	NO
P05423	DNA-directed RNA polymerase III subunit RPC4	POLR3D	345120	294010	267700	169370	143610	365090	276960	284970	194840	142750	363866	291205	273644	190253	140509	1	0.851907	0.775672	0.490757	0.416116	1.05432	0.84378	0.792894	0.551267	0.407132	0.0543162	-0.00812621	0.0172219	0.0605105	-0.00898402	0.114938	NO
P50453	Serpin B9	SERPINB9	1243900	1192300	1147500	914460	1020800	1243700	1177300	1113400	1039300	1118100	1.23953e+06	1.23785e+06	1.06915e+06	1.01483e+06	1.10055e+06	1	0.958518	0.922502	0.735156	0.820645	0.996486	0.99514	0.859512	0.815849	0.884758	-0.00351396	0.0366224	-0.0629898	0.0806933	0.0641134	0.114925	NO
P35219	Carbonic anhydrase-related protein	CA8	298930	260890	273120	199820	210930	291760	259730	274410	233650	226040	290782	273089	263503	228150	222492	1	0.872746	0.913659	0.668451	0.705617	0.972741	0.913556	0.881488	0.763221	0.744295	-0.0272588	0.0408097	-0.0321703	0.0947706	0.0386784	0.11483	NO
Q13572	Inositol-tetrakisphosphate 1-kinase	ITPK1	129490	119500	116280	96494	85421	137840	113910	125210	97283	91097	137378	119769	120233	94992.9	89667.2	1	0.922851	0.897984	0.745185	0.659673	1.06091	0.924928	0.928515	0.733593	0.692464	0.0609138	0.00207722	0.0305307	-0.0115923	0.0327915	0.114721	NO
P61244	Protein max	MAX	27569	27078	27561	21173	22308	29624	26244	26084	24149	23473	29524.6	27593.9	25047.3	23580.5	23104.6	1	0.98219	0.99971	0.768	0.80917	1.07094	1.0009	0.90853	0.855327	0.838064	0.0709365	0.0187118	-0.0911796	0.0873271	0.0288938	0.11469	NO
Q9UBT2	SUMO-activating enzyme subunit 2	UBA2	1592300	1356300	1193400	779420	638000	1704100	1295400	1255200	898220	608570	1.69838e+06	1.36203e+06	1.20531e+06	877075	599018	1	0.851787	0.749482	0.489493	0.400678	1.06662	0.855385	0.756962	0.550823	0.376197	0.0666237	0.003598	0.00748036	0.0613298	-0.0244815	0.11455	NO
Q9C0D5	Protein TANC1	TANC1	437790	403390	394970	338370	306160	457000	402770	415430	347340	318780	455467	423487	398918	339163	313777	1	0.921424	0.902191	0.772905	0.699331	1.04038	0.967328	0.911209	0.774717	0.716728	0.0403786	0.0459045	0.00901887	0.00181239	0.0173977	0.114512	NO
Q9GZT3	SRA stem-loop-interacting RNA-binding protein, mitochondrial	SLIRP	358940	310080	310730	243710	210370	382960	301310	311150	271640	215690	381676	316808	298783	265245	212305	1	0.863877	0.865688	0.678971	0.586087	1.06334	0.882621	0.832404	0.738969	0.591477	0.0633411	0.0187439	-0.0332839	0.0599974	0.00538973	0.114188	NO
P13639	Elongation factor 2	EEF2	4836100	4399800	4315900	3302600	3437900	5093900	4277800	4231700	3798100	3553000	5.07682e+06	4.49783e+06	4.06351e+06	3.70869e+06	3.49723e+06	1	0.909783	0.892434	0.682906	0.710883	1.04977	0.930053	0.840245	0.766876	0.723152	0.0497749	0.0202703	-0.0521893	0.0839707	0.0122688	0.114095	NO
P35269	General transcription factor IIF subunit 1	GTF2F1	515820	469450	461840	363720	394100	548260	456930	451680	402570	416640	546421	480432	433728	393093	410101	1	0.910104	0.895351	0.70513	0.764026	1.05933	0.931395	0.840851	0.762075	0.795046	0.0593255	0.0212909	-0.0545004	0.0569449	0.0310196	0.11408	NO
Q96RE7	Nucleus accumbens-associated protein 1	NACC1	263540	231380	232120	174430	161740	276080	223310	242470	185950	171610	275154	234796	232833	181573	168916	1	0.877969	0.880777	0.661873	0.613721	1.04407	0.890931	0.883482	0.688976	0.640952	0.0440696	0.0129619	0.00270478	0.0271027	0.027231	0.11407	NO
P62937	Peptidyl-prolyl cis-trans isomerase A;Peptidyl-prolyl cis-trans isomerase A, N-terminally processed	PPIA	2846500	2578400	2570100	2094200	2207600	3099100	2505600	2501900	2328800	2257200	3.08871e+06	2.63448e+06	2.40246e+06	2.27398e+06	2.22177e+06	1	0.905814	0.902898	0.735711	0.775549	1.08509	0.925514	0.844005	0.798868	0.780528	0.0850892	0.0197	-0.0588935	0.0631579	0.00497862	0.114032	NO
P11831	Serum response factor	SRF	61783	63024	55168	54220	49822	68215	57348	59615	55323	52316	67986.2	60297.7	57245.5	54020.7	51494.9	1	1.02009	0.892932	0.877588	0.806403	1.1004	0.975959	0.926558	0.874361	0.833479	0.100403	-0.044127	0.0336266	-0.0032263	0.0270764	0.113753	NO
P31040	Succinate dehydrogenase [ubiquinone] flavoprotein subunit, mitochondrial	SDHA	553980	488720	456280	376930	356840	580580	468900	471880	401290	385160	578633	493018	453125	391843	379115	1	0.882198	0.82364	0.680404	0.644139	1.0445	0.889956	0.817944	0.707324	0.684347	0.0445014	0.0077583	-0.00569567	0.0269205	0.0402084	0.113693	NO
Q9GZM5	Protein YIPF3;Protein YIPF3, 36 kDa form III	YIPF3	5756.6	5678.8	5547.2	5486.3	5367.1	7397.7	6054.5	4906.5	5139.8	5100.7	7372.89	6365.91	4711.49	5018.81	5020.64	1	0.986485	0.963624	0.953045	0.932339	1.28077	1.10585	0.81845	0.871835	0.872154	0.280772	0.119361	-0.145175	-0.08121	-0.0601847	0.113563	NO
Q9H1J1	Regulator of nonsense transcripts 3A	UPF3A	5158	4236.4	4871	3539	3456.7	4757.2	4311.8	4695.1	3886.6	4335.4	4741.25	4533.58	4508.49	3795.11	4267.35	1	0.821326	0.944358	0.686119	0.670163	0.919202	0.878941	0.874077	0.735771	0.827327	-0.0807977	0.057615	-0.0702813	0.0496525	0.157164	0.113353	NO
P60891	Ribose-phosphate pyrophosphokinase 1	PRPS1	465360	414080	393500	261270	212280	514830	374250	389210	316590	213090	513103	393500	373741	309137	209745	1	0.889806	0.845582	0.561436	0.456163	1.10259	0.845581	0.803121	0.664297	0.450716	0.102595	-0.0442247	-0.0424607	0.102861	-0.00544654	0.113324	NO
Q9NRA8	Eukaryotic translation initiation factor 4E transporter	EIF4ENIF1	75027	67799	69021	57639	53396	73040	67762	70223	60219	62082	72795	71247.3	67431.9	58801.4	61107.6	1	0.903661	0.919949	0.768243	0.71169	0.970251	0.949623	0.898769	0.783737	0.814475	-0.0297487	0.0459614	-0.02118	0.0154933	0.102784	0.11331	NO
Q15651	High mobility group nucleosome-binding domain-containing protein 3	HMGN3	64917	67500	61757	51360	52624	57478	69316	71064	55315	53933	57285.2	72881.3	68239.5	54012.9	53086.5	1	1.03979	0.951322	0.791164	0.810635	0.882438	1.12268	1.05118	0.832029	0.817759	-0.117562	0.0828948	0.0998583	0.0408654	0.00712422	0.113181	NO
P62942	Peptidyl-prolyl cis-trans isomerase FKBP1A	FKBP1A	321380	285400	282440	257560	237010	362210	275630	292000	258520	240300	360995	289807	280394	252434	236528	1	0.888045	0.878835	0.801419	0.737476	1.12327	0.901758	0.872469	0.78547	0.735977	0.123266	0.013713	-0.00636566	-0.015949	-0.00149879	0.113166	NO
O00764	Pyridoxal kinase	PDXK	464400	403830	389380	262130	198970	466740	399480	415250	296300	201090	465175	420027	398746	289325	197934	1	0.869574	0.838458	0.564449	0.428445	1.00167	0.904452	0.858625	0.623008	0.426214	0.00166815	0.0348779	0.0201669	0.0585593	-0.00223138	0.113041	NO
P49643	DNA primase large subunit	PRIM2	259360	230330	153090	87360	66981	279330	213970	172400	94997	65765	278393	224976	165548	92760.7	64732.8	1	0.888071	0.590261	0.336829	0.258255	1.07339	0.867426	0.638294	0.357652	0.249587	0.0733853	-0.0206447	0.0480329	0.0208233	-0.00866837	0.112928	NO
P30307	M-phase inducer phosphatase 3	CDC25C	14819	13648	13841	13648	11805	16291	13255	14061	13165	13109	16236.4	13936.8	13502.1	12855.1	12903.2	1	0.92098	0.934004	0.92098	0.796612	1.09565	0.940466	0.911137	0.867473	0.870723	0.0956451	0.0194867	-0.022867	-0.0535063	0.0741106	0.112869	NO
P78395	Melanoma antigen preferentially expressed in tumors	PRAME	29711	22056	17489	11908	9587	34889	20003	18971	12973	7533.6	34772	21031.9	18217	12667.6	7415.35	1	0.742351	0.588637	0.400794	0.322675	1.17034	0.707881	0.613139	0.426361	0.249583	0.170341	-0.0344701	0.0245021	0.0255666	-0.0730923	0.112847	NO
O00410	Importin-5	IPO5	2262300	2045200	2044800	1640100	1727000	2332500	1971100	2019100	1844100	1866700	2.32468e+06	2.07248e+06	1.93885e+06	1.80069e+06	1.8374e+06	1	0.904036	0.903859	0.72497	0.763382	1.02757	0.916096	0.857026	0.795955	0.812183	0.0275726	0.0120602	-0.0468333	0.0709848	0.0488003	0.112585	NO
Q9BVS5	tRNA (adenine(58)-N(1))-methyltransferase, mitochondrial	TRMT61B	11370	9692.9	9992.8	8034.3	7415.5	10941	9419.3	11749	8990.7	7026.1	10904.3	9903.78	11282	8779.05	6915.82	1	0.852498	0.878874	0.706623	0.652199	0.959042	0.871045	0.992263	0.772124	0.608252	-0.040958	0.0185473	0.113388	0.0655017	-0.0439472	0.112532	NO
Q9H832	Ubiquitin-conjugating enzyme E2 Z	UBE2Z	308930	280390	283250	223450	219330	312800	276690	288580	240630	239060	311751	290922	277110	234965	235308	1	0.907617	0.916874	0.723303	0.709967	1.00913	0.941707	0.897	0.760578	0.761686	0.00913138	0.0340905	-0.0198746	0.0372753	0.0517197	0.112342	NO
Q9BVG4	Protein PBDC1	PBDC1	402710	354310	362160	280930	287130	390030	346750	378160	318750	309610	388722	364585	363130	311246	304750	1	0.879814	0.899307	0.697599	0.712994	0.965265	0.905329	0.901715	0.77288	0.756749	-0.0347348	0.025515	0.00240793	0.0752811	0.0437547	0.112224	NO
Q14103	Heterogeneous nuclear ribonucleoprotein D0	HNRNPD	1148000	1076600	1085000	810350	926880	1166400	1069700	1064200	902950	1000500	1.16249e+06	1.12472e+06	1.0219e+06	881694	984796	1	0.937805	0.945122	0.70588	0.807387	1.01262	0.979721	0.890159	0.768026	0.857837	0.0126204	0.0419165	-0.054963	0.0621464	0.0504499	0.11217	NO
Q6ZS17	Protein FAM65A	FAM65A	268280	243490	217300	166290	134010	271030	229200	227730	183840	152510	270121	240989	218679	179512	150116	1	0.907597	0.809975	0.619837	0.499515	1.00686	0.898274	0.815114	0.669123	0.559551	0.00686239	-0.00932258	0.00513893	0.0492855	0.0600352	0.111999	NO
P30153	Serine/threonine-protein phosphatase 2A 65 kDa regulatory subunit A alpha isoform	PPP2R1A	1168400	1102700	1046800	880170	856780	1324300	1050800	1023200	972040	842480	1.31986e+06	1.10485e+06	982532	949158	829257	1	0.943769	0.895926	0.753312	0.733293	1.12963	0.945608	0.840921	0.812357	0.709737	0.129629	0.00183846	-0.0550051	0.0590446	-0.0235564	0.111951	NO
Q14651	Plastin-1	PLS1	428830	386080	379890	300510	310520	415160	383880	389840	332710	342590	413768	403625	374345	324878	337213	1	0.90031	0.885876	0.700767	0.72411	0.964876	0.941224	0.872946	0.757591	0.786355	-0.0351242	0.0409135	-0.0129294	0.056824	0.0622457	0.111929	NO
Q9UBP0	Spastin	SPAST	485330	412660	406080	336390	294370	506290	406430	431330	352640	303440	504592	427335	414186	344339	298677	1	0.850267	0.836709	0.693116	0.606536	1.03969	0.880504	0.853412	0.709494	0.615411	0.0396886	0.0302367	0.0167029	0.0163779	0.00887498	0.111881	NO
Q9NRY5	Protein FAM114A2	FAM114A2	546010	459450	467190	362520	318810	553240	446150	507270	391130	330620	551385	469098	487108	381923	325431	1	0.841468	0.855644	0.663944	0.58389	1.00984	0.859138	0.892123	0.699479	0.596016	0.00984339	0.0176696	0.0364794	0.0355353	0.0121256	0.111653	NO
P05023	Sodium/potassium-transporting ATPase subunit alpha-1	ATP1A1	30643	26582	23735	18351	14253	32366	24586	23828	19609	17112	32257.5	25850.6	22880.9	19147.4	16843.4	1	0.867474	0.774565	0.598864	0.465131	1.05269	0.843605	0.746694	0.624854	0.549666	0.0526859	-0.0238689	-0.0278714	0.0259894	0.0845353	0.11147	NO
Q16643	Drebrin	DBN1	699380	660280	637640	505760	430490	745940	607980	650920	555240	468960	743438	639252	625049	542169	461599	1	0.944093	0.911722	0.723155	0.615531	1.063	0.914026	0.893718	0.775214	0.660012	0.0629963	-0.0300673	-0.0180036	0.0520595	0.0444813	0.111466	NO
Q5EBL8	PDZ domain-containing protein 11	PDZD11	3630.4	4247.3	3744	3112.8	2948.3	4459.1	4381.1	3465.4	3503.6	2324.2	4444.15	4606.44	3327.66	3421.12	2287.72	1	1.16993	1.03129	0.857426	0.812114	1.22415	1.26885	0.916611	0.942354	0.630156	0.224148	0.0989264	-0.11468	0.0849283	-0.181958	0.111364	NO
Q9UBF8	Phosphatidylinositol 4-kinase beta	PI4KB	170900	156330	153730	122470	101910	183380	152910	157000	127610	107120	182765	160775	150760	124606	105439	1	0.914745	0.899532	0.716618	0.596314	1.06943	0.940755	0.882153	0.729116	0.616961	0.0694265	0.0260091	-0.0173792	0.0124985	0.0206476	0.111203	NO
P35270	Sepiapterin reductase	SPR	498300	449640	450910	358070	383450	497240	423510	458250	415090	416060	495572	445293	440036	405319	409530	1	0.902348	0.904897	0.718583	0.769516	0.994526	0.893625	0.883075	0.813403	0.821854	-0.00547381	-0.00872305	-0.0218213	0.0948195	0.0523372	0.111139	NO
Q9Y3B7	39S ribosomal protein L11, mitochondrial	MRPL11	12209	10743	10686	7184.9	7834.7	13255	10447	10656	8154.2	7744.5	13210.5	10984.3	10232.5	7962.25	7622.94	1	0.879925	0.875256	0.588492	0.641715	1.08203	0.899692	0.838109	0.652162	0.624371	0.0820335	0.0197676	-0.0371474	0.0636699	-0.0173442	0.110979	NO
P35250	Replication factor C subunit 2	RFC2	444360	380860	289930	169350	122680	441880	368050	322800	196820	128770	440398	386981	309970	192187	126749	1	0.857098	0.652466	0.38111	0.276082	0.991084	0.870872	0.697565	0.432502	0.285239	-0.00891606	0.0137742	0.0450986	0.0513925	0.00915668	0.110506	NO
P62979	Ubiquitin-40S ribosomal protein S27a;Ubiquitin;40S ribosomal protein S27a;Polyubiquitin-B;Ubiquitin;Polyubiquitin-C;Ubiquitin	RPS27A;UBB;UBC	1818800	1609000	1591300	1374200	1209800	1912500	1493800	1724400	1418600	1306700	1.90609e+06	1.57063e+06	1.65586e+06	1.38521e+06	1.28619e+06	1	0.884649	0.874918	0.755553	0.665164	1.04799	0.863555	0.910415	0.761604	0.707164	0.047991	-0.0210942	0.0354971	0.00605095	0.0420004	0.110445	NO
Q8IWY9	Codanin-1	CDAN1	191510	184980	155330	130690	88649	188800	191930	183590	121390	88836	188167	201802	176293	118532	87441.7	1	0.965903	0.81108	0.682419	0.462895	0.982543	1.05374	0.920542	0.618936	0.456591	-0.017457	0.0878385	0.109462	-0.0634827	-0.00630434	0.110056	NO
O60271	C-Jun-amino-terminal kinase-interacting protein 4	SPAG9	1170300	1083500	1058200	825020	838720	1177400	1062400	1086600	918810	886800	1.17345e+06	1.11704e+06	1.04341e+06	897181	872881	1	0.925831	0.904213	0.704965	0.716671	1.00269	0.954494	0.891577	0.766625	0.745861	0.00269276	0.0286633	-0.012636	0.0616601	0.02919	0.10957	NO
Q86WR7	Proline and serine-rich protein 2	PROSER2	123210	114630	109560	87366	85357	131650	105550	112510	97567	89521	131208	110979	108038	95270.2	88115.9	1	0.930363	0.889214	0.709082	0.692777	1.06492	0.90073	0.876862	0.773235	0.715168	0.0649175	-0.0296325	-0.0123513	0.0641525	0.0223919	0.109478	NO
Q8WXB1	Protein N-lysine methyltransferase METTL21A	METTL21A	13326	10797	10873	8326	7332.3	12601	10645	12648	9361.4	7188.2	12558.7	11192.5	12145.3	9141.03	7075.38	1	0.810221	0.815924	0.624794	0.550225	0.942424	0.839901	0.911398	0.685954	0.530945	-0.0575762	0.0296809	0.0954746	0.0611607	-0.0192799	0.10946	NO
Q6ZN17	Protein lin-28 homolog B	LIN28B	235880	214060	216540	176370	157750	238930	216700	221860	190930	163530	238129	227846	213042	186435	160963	1	0.907495	0.918009	0.747711	0.668772	1.00953	0.96594	0.903179	0.790382	0.682395	0.00953322	0.058445	-0.0148297	0.0426718	0.0136225	0.109443	NO
Q8TEH3	DENN domain-containing protein 1A	DENND1A	161940	146840	146750	133320	126300	179700	136930	153480	144710	123040	179097	143973	147380	141303	121109	1	0.906756	0.9062	0.823268	0.779918	1.10595	0.889052	0.910089	0.872567	0.747862	0.105949	-0.017704	0.00388911	0.0492989	-0.0320563	0.109376	NO
O75131	Copine-3	CPNE3	756300	712720	690520	545670	553760	731900	716260	703150	581590	625860	729445	753101	675203	567899	616037	1	0.942377	0.913024	0.721499	0.732196	0.964492	0.99577	0.892771	0.750891	0.81454	-0.0355078	0.0533928	-0.020253	0.0293919	0.0823439	0.109368	NO
Q14678	KN motif and ankyrin repeat domain-containing protein 1	KANK1	62863	55898	42579	31062	29915	68970	53916	46924	32430	27463	68738.7	56689.2	45059	31666.6	27031.9	1	0.889204	0.67733	0.494122	0.475876	1.09347	0.901789	0.71678	0.50374	0.430014	0.0934682	0.0125857	0.0394503	0.00961745	-0.0458625	0.109259	NO
O60232	Sjoegren syndrome/scleroderma autoantigen 1	SSSCA1	173100	149330	151960	82159	67959	174870	146150	154660	102830	67600	174284	153667	148513	100409	66539	1	0.862681	0.877874	0.474633	0.3926	1.00684	0.887737	0.85796	0.580065	0.384396	0.0068373	0.0250563	-0.0199139	0.105432	-0.00820353	0.109208	NO
Q15814	Tubulin-specific chaperone C	TBCC	347540	321620	334040	286470	285000	376050	318300	333430	292680	301920	374789	334672	320178	285790	297181	1	0.925419	0.961156	0.824279	0.820049	1.0784	0.962974	0.921268	0.822323	0.855099	0.0784049	0.0375548	-0.0398874	-0.00195612	0.0350496	0.109166	NO
Q6KC79	Nipped-B-like protein	NIPBL	265830	238020	248430	194220	183120	276800	227240	245060	213440	203240	275872	238928	235320	208416	200050	1	0.895384	0.934545	0.730617	0.688861	1.03777	0.8988	0.885227	0.784018	0.752549	0.0377749	0.00341619	-0.0493177	0.0534007	0.0636873	0.108961	NO
P05166	Propionyl-CoA carboxylase beta chain, mitochondrial	PCCB	204250	180920	173740	145070	145410	218840	174460	180900	157520	144820	218106	183433	173710	153812	142547	1	0.885777	0.850624	0.710257	0.711922	1.06784	0.898083	0.850477	0.753057	0.697904	0.0678388	0.0123054	-0.000147023	0.0428	-0.0140174	0.10878	NO
Q8NB14	Ubiquitin carboxyl-terminal hydrolase 38	USP38	93483	87931	78382	60722	51620	100450	80757	83782	66726	52499	100113	84910.7	80452	65155.2	51675	1	0.94061	0.838463	0.649551	0.552186	1.07092	0.908301	0.860606	0.696974	0.552774	0.0709233	-0.032308	0.0221432	0.0474229	0.000588242	0.10877	NO
P78346	Ribonuclease P protein subunit p30	RPP30	182960	168070	168120	131200	124160	220050	158230	162020	135000	123250	219312	166369	155580	131822	121316	1	0.918616	0.918889	0.717097	0.678618	1.19869	0.909317	0.850352	0.720496	0.663071	0.198688	-0.00929938	-0.0685375	0.00339984	-0.0155471	0.108704	NO
Q9NZT2	Opioid growth factor receptor	OGFR	316120	281850	256270	196190	173020	328400	265530	280870	212400	176970	327299	279188	269707	207400	174192	1	0.891592	0.810673	0.620619	0.547324	1.03536	0.88317	0.853178	0.65608	0.551032	0.035362	-0.00842219	0.0425047	0.0354612	0.00370849	0.108614	NO
Q9NZ63	Uncharacterized protein C9orf78	C9orf78	724190	636180	671200	549490	564100	750180	635370	666240	617710	574150	747664	668050	639760	603169	565138	1	0.878471	0.926829	0.758765	0.778939	1.03241	0.922479	0.883414	0.832888	0.780373	0.0324143	0.0440083	-0.0434144	0.0741225	0.00143375	0.108564	NO
Q9NW68	BSD domain-containing protein 1	BSDC1	132970	122980	118530	100630	94092	136940	121120	126740	103370	98685	136481	127350	121703	100937	97136.1	1	0.92487	0.891404	0.756787	0.707618	1.0264	0.957734	0.915264	0.759093	0.730511	0.0264025	0.0328632	0.0238596	0.00230593	0.0228929	0.108324	NO
Q8NCW5	NAD(P)H-hydrate epimerase	APOA1BP	616020	552610	548900	422320	456740	614850	535750	553270	482380	492640	612788	563306	531280	471025	484908	1	0.897065	0.891042	0.685562	0.741437	0.994753	0.914429	0.862439	0.764625	0.787162	-0.00524663	0.0173637	-0.0286033	0.0790632	0.0457252	0.108302	NO
Q8TBA6	Golgin subfamily A member 5	GOLGA5	25370	23087	21530	17883	16399	27501	22300	21093	18403	18221	27408.8	23447	20254.6	17969.8	17935	1	0.910012	0.84864	0.704888	0.646393	1.08036	0.924202	0.79837	0.708308	0.706938	0.0803614	0.0141901	-0.0502704	0.00342075	0.0605443	0.108246	NO
Q8IYB9	Zinc finger protein 595;Zinc finger protein 519;Zinc finger protein 732;Zinc finger protein 141;Zinc finger protein 718	ZNF595;ZNF519;ZNF732;ZNF141;ZNF718	80485	75395	67727	30201	17293	85370	76017	72280	30805	15551	85083.7	79926.9	69407.2	30079.8	15306.9	1	0.936758	0.841486	0.375238	0.21486	1.05714	0.993066	0.862362	0.373732	0.190183	0.0571373	0.056308	0.0208755	-0.00150543	-0.0246765	0.108139	NO
Q96CD0	F-box/LRR-repeat protein 8	FBXL8	73556	68236	66989	55713	45007	77955	65817	72728	56394	46382	77693.6	69202.3	69837.4	55066.5	45654	1	0.927674	0.910721	0.757423	0.611874	1.05625	0.940811	0.949445	0.748633	0.62067	0.0562505	0.013137	0.0387237	-0.0087898	0.00879604	0.108117	NO
Q8NHP8	Putative phospholipase B-like 2;Putative phospholipase B-like 2 32 kDa form;Putative phospholipase B-like 2 45 kDa form	PLBD2	686540	625880	633560	492080	518770	638980	610600	646040	556720	597550	636837	642006	620363	543615	588171	1	0.911644	0.92283	0.716754	0.75563	0.927604	0.935133	0.903607	0.791818	0.856718	-0.0723963	0.0234892	-0.0192231	0.0750641	0.101088	0.108022	NO
Q08623	Pseudouridine-5-phosphatase	HDHD1	280840	232110	261420	188560	192300	265160	233890	263230	228630	202510	264271	245920	252768	223248	199331	1	0.826485	0.93085	0.671414	0.684732	0.941001	0.875659	0.900042	0.794929	0.709769	-0.058999	0.0491745	-0.0308087	0.123515	0.0250372	0.107919	NO
P46109	Crk-like protein	CRKL	1823000	1627100	1601100	1166300	1414300	1937600	1445100	1545400	1459100	1492600	1.9311e+06	1.51943e+06	1.48398e+06	1.42475e+06	1.46917e+06	1	0.89254	0.878278	0.63977	0.775809	1.0593	0.833477	0.81403	0.781543	0.805909	0.0592989	-0.0590626	-0.0642475	0.141773	0.0301002	0.107862	NO
Q5VZE5	N-alpha-acetyltransferase 35, NatC auxiliary subunit	NAA35	53508	48000	31075	20344	13994	55313	43971	40161	20382	13068	55127.5	46232.7	38564.8	19902.2	12862.9	1	0.897062	0.580754	0.380205	0.261531	1.03027	0.864033	0.720729	0.371948	0.240392	0.0302664	-0.0330295	0.139975	-0.00825675	-0.0211391	0.107816	NO
Q15024	Exosome complex component RRP42	EXOSC7	256420	212970	211570	149400	124000	272050	198570	229460	159130	128360	271138	208783	220340	155384	126345	1	0.830551	0.825092	0.582638	0.483582	1.0574	0.814225	0.859293	0.605975	0.492728	0.0573965	-0.0163268	0.0342014	0.0233367	0.00914631	0.107754	NO
P51452	Dual specificity protein phosphatase 3	DUSP3	390500	341610	341170	266070	241780	397870	338820	353040	301830	240370	396536	356247	339008	294725	236597	1	0.874802	0.873675	0.681357	0.619155	1.01546	0.912285	0.868139	0.754737	0.605883	0.0154562	0.0374834	-0.0055362	0.0733797	-0.0132722	0.107511	NO
O14841	5-oxoprolinase	OPLAH	514870	477580	453670	371730	307180	526370	461900	481760	385900	335930	524605	485658	462612	376816	330657	1	0.927574	0.881135	0.721988	0.596617	1.01891	0.943263	0.898503	0.731866	0.642215	0.0189071	0.0156892	0.0173675	0.00987769	0.0455986	0.10744	NO
P17050	Alpha-N-acetylgalactosaminidase	NAGA	159380	152210	152010	133900	130770	163700	144620	157340	139630	145020	163151	152059	151086	136343	142744	1	0.955013	0.953758	0.840131	0.820492	1.02366	0.954063	0.947963	0.855459	0.895619	0.0236604	-0.00095023	-0.00579506	0.0153284	0.0751274	0.107371	NO
P61970	Nuclear transport factor 2	NUTF2	556680	524560	518510	408170	478920	568280	517200	472100	495330	507300	566374	543802	453336	483670	499338	1	0.942301	0.931433	0.733222	0.860315	1.01741	0.976867	0.814356	0.868847	0.896992	0.0174142	0.0345661	-0.117076	0.135625	0.0366774	0.107206	NO
P23588	Eukaryotic translation initiation factor 4B	EIF4B	1371700	1248300	1228100	944580	1006600	1494700	1193100	1174200	1058000	1058100	1.48969e+06	1.25447e+06	1.12753e+06	1.03309e+06	1.04149e+06	1	0.910039	0.895312	0.68862	0.733834	1.08602	0.914535	0.821995	0.753149	0.759271	0.0860153	0.00449609	-0.0733175	0.0645288	0.0254373	0.10716	NO
Q8TBZ6	tRNA methyltransferase 10 homolog A	TRMT10A	104710	88187	94384	83973	67535	101450	89702	101710	86151	73950	101110	94315.8	97667.4	84123	72789.3	1	0.842202	0.901385	0.801958	0.644972	0.965617	0.900734	0.932742	0.80339	0.695151	-0.0343829	0.0585315	0.0313575	0.00143218	0.0501796	0.107118	NO
Q8NB46	Serine/threonine-protein phosphatase 6 regulatory ankyrin repeat subunit C	ANKRD52	46077	36451	28979	24082	15708	42198	35542	31438	23631	23916	42056.5	37370.1	30188.5	23074.7	23540.6	1	0.791089	0.628925	0.522647	0.340908	0.912743	0.811036	0.655174	0.500786	0.510897	-0.0872566	0.0199472	0.0262489	-0.0218609	0.16999	0.107068	NO
Q9UI08	Ena/VASP-like protein	EVL	264530	237210	238090	180780	183960	258840	229300	245250	209140	197160	257972	241094	235502	204217	194065	1	0.896722	0.900049	0.683401	0.695422	0.975209	0.911405	0.890267	0.771998	0.733624	-0.0247914	0.014683	-0.00978217	0.0885977	0.0382015	0.106908	NO
P13073	Cytochrome c oxidase subunit 4 isoform 1, mitochondrial	COX4I1	191390	180300	172250	144770	145880	183170	176210	183430	150620	166620	182556	185273	176139	147074	164005	1	0.942055	0.899995	0.756414	0.762213	0.953841	0.968041	0.920317	0.768454	0.856914	-0.0461586	0.0259856	0.0203219	0.01204	0.0947008	0.10689	NO
O43598	2-deoxynucleoside 5-phosphate N-hydrolase 1	DNPH1	176410	163860	158180	130200	141330	188210	163190	152780	145200	143430	187579	171584	146708	141782	141179	1	0.928859	0.896661	0.738053	0.801145	1.06331	0.972642	0.831629	0.803707	0.800288	0.0633116	0.0437827	-0.0650325	0.0656534	-0.000857302	0.106858	NO
P11171	Protein 4.1	EPB41	986170	853910	851630	605430	541330	1012000	830280	871090	677660	572980	1.00861e+06	872986	836468	661708	563987	1	0.865885	0.863573	0.613921	0.548922	1.02275	0.885228	0.848198	0.670987	0.571896	0.0227507	0.0193431	-0.0153749	0.0570668	0.0229744	0.10676	NO
Q9BUJ2	Heterogeneous nuclear ribonucleoprotein U-like protein 1	HNRNPUL1	1087400	985130	998040	778780	837460	1116400	945810	995770	870810	903360	1.11266e+06	994458	956192	850311	889181	1	0.90595	0.917822	0.716185	0.770149	1.02323	0.914528	0.879338	0.781967	0.817713	0.023226	0.00857815	-0.0384842	0.0657814	0.047564	0.106665	NO
A2RUC4	tRNA wybutosine-synthesizing protein 5	TYW5	138350	124090	117000	89797	82412	137680	118120	125720	97213	90765	137218	124196	120723	94924.6	89340.4	1	0.896928	0.845681	0.649057	0.595678	0.99182	0.897691	0.872592	0.686119	0.645756	-0.00818026	0.000762708	0.0269111	0.0370622	0.0500786	0.106634	NO
Q15365	Poly(rC)-binding protein 1	PCBP1	1465700	1348300	1335100	1066000	1094500	1473600	1282200	1386000	1177100	1187100	1.46866e+06	1.34815e+06	1.33091e+06	1.14939e+06	1.16847e+06	1	0.919902	0.910896	0.727298	0.746742	1.00202	0.9198	0.908039	0.784192	0.797208	0.00201813	-0.000102233	-0.00285719	0.0568947	0.0504657	0.106419	NO
Q7Z739	YTH domain-containing family protein 3	YTHDF3	308080	283720	269230	230080	216290	324740	280510	271610	236740	233260	323651	294938	260815	231167	229599	1	0.92093	0.873896	0.746819	0.702058	1.05054	0.957342	0.846581	0.750347	0.745257	0.0505418	0.0364129	-0.0273156	0.00352839	0.0431992	0.106367	NO
P30046	D-dopachrome decarboxylase;D-dopachrome decarboxylase-like protein	DDT;DDTL	277130	229820	239410	203230	182760	303070	218490	223350	222390	201560	302054	229728	214473	217155	198396	1	0.829286	0.863891	0.733338	0.659474	1.08993	0.828954	0.773907	0.783585	0.715896	0.0899347	-0.000331731	-0.0899839	0.0502466	0.0564225	0.106288	NO
P51911	Calponin-1	CNN1	25297	23318	21713	17904	13981	26986	22598	22795	18201	14815	26895.5	23760.3	21889	17772.5	14582.5	1	0.921769	0.858323	0.707752	0.552674	1.06319	0.939255	0.86528	0.702555	0.57645	0.0631892	0.0174855	0.00695706	-0.00519668	0.0237763	0.106211	NO
O14641	Segment polarity protein dishevelled homolog DVL-2	DVL2	158910	112960	104270	80901	69152	148350	110540	120730	90189	76145	147852	116226	115931	88065.9	74949.8	1	0.710843	0.656158	0.509099	0.435165	0.930416	0.731393	0.729542	0.554187	0.47165	-0.0695836	0.0205503	0.0733842	0.0450878	0.0364851	0.105924	NO
Q8N6T3	ADP-ribosylation factor GTPase-activating protein 1	ARFGAP1	400070	350650	323110	216320	183830	432030	336660	333930	232280	187240	430581	353976	320658	226812	184301	1	0.876472	0.807634	0.540705	0.459495	1.07626	0.884786	0.801504	0.566931	0.460672	0.0762644	0.00831394	-0.00612978	0.0262255	0.00117763	0.105852	NO
Q8NHP6	Motile sperm domain-containing protein 2	MOSPD2	49216	41386	41170	33254	34041	49409	40536	42802	36985	35756	49243.3	42621	41100.8	36114.4	35194.8	1	0.840905	0.836517	0.675675	0.691665	1.00055	0.865998	0.83511	0.733793	0.715109	0.000554623	0.025093	-0.00140611	0.0581184	0.0234433	0.105803	NO
O00161	Synaptosomal-associated protein 23	SNAP23	331790	299010	297400	245950	232500	329050	297310	317970	260760	245030	327946	312602	305332	254622	241184	1	0.901203	0.89635	0.741282	0.700744	0.988416	0.942169	0.920257	0.767418	0.726918	-0.0115843	0.0409662	0.0239067	0.0261358	0.0261734	0.105598	NO
Q9H910	Hematological and neurological expressed 1-like protein	HN1L	519970	456450	489520	402900	406740	528760	449600	494000	437350	436190	526987	472725	474366	427055	429344	1	0.877839	0.941439	0.774852	0.782237	1.01349	0.909139	0.912294	0.821306	0.825709	0.0134944	0.0313004	-0.0291449	0.0464538	0.0434711	0.105575	NO
P51570	Galactokinase	GALK1	479000	439220	385420	281030	225230	496300	418160	411580	300080	241720	494636	439668	395221	293016	237926	1	0.916952	0.804635	0.586701	0.470209	1.03264	0.917888	0.825097	0.611724	0.496714	0.0326421	0.000935543	0.0204622	0.0250229	0.0265053	0.105568	NO
P10606	Cytochrome c oxidase subunit 5B, mitochondrial	COX5B	100220	87483	84804	67831	53205	105520	80863	93297	72842	54066	105166	85022.2	89588.8	71127.3	53217.4	1	0.87291	0.846178	0.676821	0.530882	1.04935	0.848356	0.893922	0.709711	0.531006	0.0493526	-0.024554	0.0477433	0.0328903	0.000123682	0.105556	NO
P31947	14-3-3 protein sigma	SFN	341080	333620	311070	308610	260540	382290	307850	329780	289910	291030	381008	323684	316673	283085	286462	1	0.978128	0.912015	0.904802	0.763868	1.11706	0.948998	0.928441	0.829968	0.839868	0.117063	-0.0291301	0.0164261	-0.0748347	0.076	0.105524	NO
P61289	Proteasome activator complex subunit 3	PSME3	556940	500420	505610	400580	397610	571180	476210	528170	431400	428210	569264	500704	507177	421245	421489	1	0.898517	0.907836	0.719252	0.713919	1.02213	0.899027	0.91065	0.756356	0.756794	0.0221288	0.000509814	0.00281434	0.0371039	0.0428752	0.105432	NO
Q9H8U3	AN1-type zinc finger protein 3	ZFAND3	39923	35848	35214	26542	17220	43316	35241	35721	25465	19876	43170.7	37053.6	34301.2	24865.5	19564	1	0.897929	0.882048	0.66483	0.43133	1.08135	0.928127	0.859185	0.622838	0.490044	0.0813499	0.0301988	-0.0228631	-0.0419923	0.0587138	0.105407	NO
Q9UBQ7	Glyoxylate reductase/hydroxypyruvate reductase	GRHPR	927140	790570	774000	595930	660750	985190	746700	775250	689480	671890	981886	785107	744437	673249	661344	1	0.852698	0.834825	0.642762	0.712676	1.05905	0.846805	0.802939	0.726157	0.713316	0.0590482	-0.00589271	-0.0318862	0.0833955	0.000640901	0.105306	NO
Q96MW1	Coiled-coil domain-containing protein 43	CCDC43	314860	287130	295510	215020	222760	318130	278300	289010	254020	236900	317063	292614	277523	248040	233182	1	0.911929	0.938544	0.682907	0.707489	1.007	0.929348	0.881417	0.787779	0.740588	0.00699702	0.0174185	-0.0571268	0.104873	0.0330994	0.105261	NO
O75323	Protein NipSnap homolog 2	GBAS	343820	306920	288580	180690	163520	338570	298800	289930	214750	182880	337435	314169	278406	209695	180010	1	0.892676	0.839335	0.525537	0.475598	0.981428	0.91376	0.809745	0.609897	0.523558	-0.0185721	0.0210832	-0.0295897	0.0843601	0.0479599	0.105241	NO
Q8TF74	WAS/WASL-interacting protein family member 2	WIPF2	23382	21649	19694	16764	14068	22603	19648	22679	18489	15236	22527.2	20658.6	21777.6	18053.8	14996.9	1	0.925883	0.842272	0.716962	0.601659	0.963442	0.883526	0.931383	0.772122	0.641385	-0.0365582	-0.0423575	0.0891114	0.0551604	0.0397254	0.105082	NO
O75817	Ribonuclease P protein subunit p20	POP7	34572	35303	34159	25669	25085	39428	33559	33409	26336	26458	39295.8	35285.1	32081.1	25716	26042.7	1	1.02114	0.988054	0.742479	0.725587	1.13664	1.02063	0.927951	0.74384	0.753289	0.136636	-0.000517401	-0.0601027	0.00136057	0.0277023	0.105078	NO
P04183	Thymidine kinase, cytosolic	TK1	556870	518220	502210	425920	432540	568880	495660	518150	459330	467240	566972	521154	497556	448517	459906	1	0.930594	0.901844	0.764846	0.776734	1.01814	0.935864	0.893486	0.805425	0.825877	0.0181409	0.00526936	-0.00835801	0.0405789	0.0491431	0.104774	NO
Q9Y2Z0	Suppressor of G2 allele of SKP1 homolog	SUGT1	1091700	1006800	1044900	844440	889000	1127800	984730	1051500	919980	938460	1.12402e+06	1.03538e+06	1.00971e+06	898323	923730	1	0.922231	0.957131	0.773509	0.814326	1.0296	0.94841	0.924894	0.822866	0.846139	0.0296031	0.0261791	-0.0322367	0.0493572	0.031813	0.104716	NO
P49454	Centromere protein F	CENPF	353870	345170	315790	233640	201230	368810	344180	342050	241470	196070	367573	361883	328455	235786	192993	1	0.975415	0.89239	0.660242	0.568655	1.03872	1.02264	0.92818	0.666306	0.545377	0.0387236	0.0472291	0.0357898	0.00606347	-0.0232782	0.104528	NO
O95822	Malonyl-CoA decarboxylase, mitochondrial	MLYCD	10292	7698.7	6392.8	6719.1	6367.5	9388.2	7743.2	8129.7	6993.8	6514.1	9356.71	8141.47	7806.58	6829.16	6411.86	1	0.748028	0.621143	0.652847	0.618684	0.909125	0.791049	0.758509	0.663541	0.622994	-0.090875	0.0430211	0.137367	0.010694	0.00430981	0.104517	NO
Q5JTV8	Torsin-1A-interacting protein 1	TOR1AIP1	143020	132970	130500	117400	113690	144000	127870	135510	125490	123820	143517	134447	130124	122536	121877	1	0.92973	0.91246	0.820864	0.794924	1.00348	0.940057	0.909831	0.856775	0.852164	0.00347549	0.0103273	-0.00262875	0.0359104	0.0572406	0.104325	NO
Q96KR1	Zinc finger RNA-binding protein	ZFR	834640	745010	735330	578450	536890	836960	725480	764490	630150	580050	834153	762795	734105	615316	570946	1	0.892612	0.881015	0.693053	0.643259	0.999417	0.913921	0.879546	0.737223	0.684062	-0.000583395	0.0213088	-0.00146809	0.0441699	0.0408029	0.10423	NO
Q9Y2V2	Calcium-regulated heat stable protein 1	CARHSP1	93258	103650	85711	59811	68135	71214	101520	92734	64626	91855	70975.2	106742	89048.2	63104.7	90413.3	1	1.11143	0.919074	0.64135	0.730608	0.761063	1.14458	0.954859	0.676668	0.969496	-0.238937	0.0331521	0.0357847	0.0353179	0.238889	0.104206	NO
P00352	Retinal dehydrogenase 1	ALDH1A1	2545100	2289200	2265300	1751500	1935500	2482300	2175100	2326300	2013900	2123800	2.47398e+06	2.28698e+06	2.23384e+06	1.96649e+06	2.09047e+06	1	0.899454	0.890063	0.688185	0.760481	0.972054	0.89858	0.877702	0.772658	0.821369	-0.0279458	-0.000873597	-0.0123613	0.0844728	0.0608878	0.10418	NO
Q8IVW6	AT-rich interactive domain-containing protein 3B	ARID3B	138790	124330	121910	104480	94016	150940	119710	124950	106290	99435	150434	125867	119984	103788	97874.3	1	0.895814	0.878377	0.752792	0.677398	1.0839	0.90689	0.864499	0.747805	0.705197	0.083895	0.0110765	-0.0138789	-0.0049868	0.0277995	0.103905	NO
Q8TCU4	Alstrom syndrome protein 1	ALMS1	102080	92592	87815	77897	64894	106020	88877	95462	77114	70917	105664	93448.4	91667.8	75298.7	69803.9	1	0.907053	0.860257	0.763098	0.635717	1.03511	0.915443	0.897999	0.737644	0.683816	0.035114	0.00838952	0.0377427	-0.0254536	0.0480986	0.103891	NO
P41567	Eukaryotic translation initiation factor 1;Eukaryotic translation initiation factor 1b	EIF1;EIF1B	171400	147300	157300	114590	118550	173360	147500	155840	134820	119640	172779	155087	149646	131646	117762	1	0.859393	0.917736	0.668553	0.691657	1.00804	0.904823	0.873081	0.768065	0.68706	0.00804317	0.0454299	-0.0446558	0.0995115	-0.00459647	0.103732	NO
Q9H410	Kinetochore-associated protein DSN1 homolog	DSN1	207000	198900	188590	162840	147580	212290	201170	193060	160320	163880	211578	211517	185387	156546	161308	1	0.96087	0.911063	0.786667	0.712947	1.02212	1.02182	0.895588	0.756261	0.779265	0.0221161	0.0609527	-0.0154751	-0.0304058	0.0663178	0.103506	NO
P50502	Hsc70-interacting protein;Putative protein FAM10A5;Putative protein FAM10A4	ST13;ST13P5;ST13P4	1061900	1012400	945130	730420	821910	1007000	1011400	937690	800630	947090	1.00362e+06	1.06342e+06	900421	781783	932225	1	0.953385	0.890037	0.687843	0.773999	0.94512	1.00143	0.847934	0.736211	0.877884	-0.0548801	0.0480474	-0.0421031	0.0483688	0.103884	0.103317	NO
Q96N64	PWWP domain-containing protein 2A	PWWP2A	9463.2	8796.8	7605.4	5775.4	6046.9	8607.8	8080.3	8306.5	6601	7282.6	8578.93	8495.91	7976.35	6445.61	7168.29	1	0.92958	0.803682	0.610301	0.638991	0.906557	0.897784	0.842881	0.681124	0.757492	-0.0934428	-0.0317956	0.0391993	0.0708227	0.118501	0.103284	NO
O75865	Trafficking protein particle complex subunit 6A	TRAPPC6A	37620	31416	28898	19466	18396	36703	30608	30198	22873	19897	36579.9	32182.3	28997.8	22334.6	19584.7	1	0.835088	0.768155	0.517438	0.488995	0.972353	0.855458	0.770807	0.593688	0.520593	-0.0276473	0.0203702	0.00265162	0.0762509	0.0315976	0.103223	NO
P14625	Endoplasmin	HSP90B1	3944200	3558500	3536300	2505000	2437800	4077900	3479100	3503000	2981900	2429100	4.06422e+06	3.65805e+06	3.36377e+06	2.9117e+06	2.39097e+06	1	0.902211	0.896582	0.63511	0.618072	1.03043	0.92745	0.85284	0.738224	0.6062	0.0304305	0.0252391	-0.0437427	0.103115	-0.0118722	0.103169	NO
P12955	Xaa-Pro dipeptidase	PEPD	367610	346270	325390	289110	290750	386290	327900	331420	303430	317710	384994	344766	318247	296287	312723	1	0.941949	0.88515	0.786458	0.79092	1.04729	0.937857	0.86572	0.805982	0.850693	0.0472906	-0.00409241	-0.0194298	0.0195237	0.0597734	0.103066	NO
Q9NZD4	Alpha-hemoglobin-stabilizing protein	AHSP	172480	161730	163290	138810	144710	180880	155240	157960	152040	157630	180273	163225	151682	148461	155156	1	0.937674	0.946718	0.804789	0.838996	1.04518	0.94634	0.879416	0.860743	0.899559	0.0451843	0.00866648	-0.0673021	0.0559538	0.0605629	0.103065	NO
Q8TAA5	GrpE protein homolog 2, mitochondrial	GRPEL2	49267	43766	34496	20112	14499	53309	42172	36076	21879	13950	53130.2	44341.1	34642.1	21364	13731	1	0.888343	0.700185	0.408225	0.294294	1.07841	0.900017	0.703151	0.433636	0.278707	0.0784139	0.0116736	0.00296604	0.0254117	-0.0155876	0.102878	NO
Q9BZK7	F-box-like/WD repeat-containing protein TBL1XR1	TBL1XR1	508840	473850	458380	361630	330980	526660	463530	464600	403670	338760	524894	487372	446134	394167	333443	1	0.931236	0.900833	0.710695	0.65046	1.03155	0.957809	0.876767	0.774639	0.6553	0.0315497	0.0265737	-0.0240664	0.0639443	0.00484026	0.102841	NO
Q719H9	BTB/POZ domain-containing protein KCTD1	KCTD1	7436.3	6906.7	5780.5	6045.5	5539.6	9176.6	6603.7	6904.7	5250	4701	9145.82	6943.36	6630.27	5126.41	4627.21	1	0.928782	0.777336	0.812972	0.74494	1.22989	0.933712	0.891608	0.689377	0.622247	0.229889	0.00493019	0.114273	-0.123595	-0.122693	0.102804	NO
Q9Y2S6	Translation machinery-associated protein 7	TMA7	312720	279630	293200	247180	282970	347660	281450	258040	281000	287770	346494	295926	247784	274385	283253	1	0.894186	0.93758	0.79042	0.904867	1.108	0.946298	0.792351	0.877415	0.905773	0.108001	0.0521119	-0.145229	0.0869952	0.000905742	0.102785	NO
P05114	Non-histone chromosomal protein HMG-14	HMGN1	264940	226020	236130	181000	210630	256390	235630	244030	205560	210850	255530	247750	234331	200721	207541	1	0.853099	0.891258	0.683174	0.79501	0.964483	0.935116	0.884467	0.757609	0.783349	-0.0355169	0.0820173	-0.00679092	0.0744358	-0.0116609	0.102484	NO
P28072	Proteasome subunit beta type-6	PSMB6	435660	432060	411540	357260	349460	449570	413020	428360	371560	380110	448062	434264	411334	362813	374144	1	0.991737	0.944636	0.820043	0.802139	1.02847	0.996795	0.944164	0.83279	0.858798	0.0284678	0.00505841	-0.0004718	0.0127469	0.0566586	0.10246	NO
P22061	Protein-L-isoaspartate(D-aspartate) O-methyltransferase	PCMT1	920120	848690	851330	673330	696750	951220	835170	831310	756830	732360	948030	878127	798269	739014	720865	1	0.922369	0.925238	0.731785	0.757238	1.03033	0.954361	0.86757	0.803171	0.783447	0.0303329	0.0319927	-0.0576676	0.0713862	0.0262086	0.102253	NO
P45954	Short/branched chain specific acyl-CoA dehydrogenase, mitochondrial	ACADSB	79504	68708	62339	43651	37651	80526	64659	63765	51949	40396	80255.9	67984.7	61230.6	50726.1	39762	1	0.864208	0.784099	0.549042	0.473574	1.00946	0.855111	0.770158	0.638032	0.500125	0.00945787	-0.00909708	-0.0139414	0.0889904	0.0265516	0.101961	NO
P22314	Ubiquitin-like modifier-activating enzyme 1	UBA1	2465100	2265500	2079600	1745300	1755600	2403200	2222300	2218800	1911600	1862500	2.39514e+06	2.3366e+06	2.13061e+06	1.8666e+06	1.83327e+06	1	0.91903	0.843617	0.708004	0.712182	0.97162	0.947874	0.864311	0.757211	0.743689	-0.02838	0.0288444	0.0206936	0.0492069	0.0315065	0.101871	NO
A6NDG6	Phosphoglycolate phosphatase	PGP	678230	629650	613590	512610	529320	657660	610120	629050	577520	576610	655454	641502	604048	563925	567560	1	0.928372	0.904693	0.755806	0.780443	0.966419	0.945847	0.890624	0.831466	0.836825	-0.0335809	0.0174743	-0.0140692	0.07566	0.0563816	0.101866	NO
Q9UID6	Zinc finger protein 639	ZNF639	37835	30979	26660	23736	17855	42882	31316	27582	20700	18851	42738.2	32926.7	26485.7	20212.7	18555.1	1	0.818792	0.704639	0.627356	0.471918	1.12959	0.870272	0.700032	0.534233	0.490422	0.129594	0.0514799	-0.00460607	-0.0931225	0.0185046	0.10185	NO
P0DPB6			139020	122950	92605	85010	62900	166450	100080	111270	76402	65086	165892	105228	106847	74603.5	64064.4	1	0.884405	0.666127	0.611495	0.452453	1.19329	0.756924	0.768576	0.536638	0.460829	0.193294	-0.127481	0.102449	-0.0748564	0.00837598	0.101782	NO
P31948	Stress-induced-phosphoprotein 1	STIP1	4604800	4107600	4217900	3236200	3606800	4743500	3920500	4124100	3798200	3782300	4.72759e+06	4.12215e+06	3.96018e+06	3.70879e+06	3.72293e+06	1	0.892026	0.915979	0.702788	0.78327	1.02667	0.895186	0.860012	0.805418	0.80849	0.026666	0.00316008	-0.0559668	0.10263	0.0252202	0.101709	NO
P20839	Inosine-5-monophosphate dehydrogenase 1	IMPDH1	187300	76625	33572	25706	24992	203100	71187	41423	26164	25032	202419	74848.5	39776.6	25548.1	24639.1	1	0.409103	0.179242	0.137245	0.133433	1.08072	0.399618	0.212368	0.136402	0.131549	0.08072	-0.00948471	0.0331266	-0.000843103	-0.00188412	0.101635	NO
Q15369	Transcription elongation factor B polypeptide 1	TCEB1	418430	411470	361500	266240	267440	411350	409440	369980	306660	276700	409970	430500	355275	299441	272357	1	0.983366	0.863944	0.636283	0.639151	0.979783	1.02884	0.849066	0.71563	0.650902	-0.0202174	0.0454786	-0.0148775	0.0793468	0.0117511	0.101482	NO
Q5R3I4	Tetratricopeptide repeat protein 38	TTC38	214250	188810	189040	150590	139910	216470	178520	193700	171210	150030	215744	187702	186001	167180	147675	1	0.88126	0.882334	0.70287	0.653022	1.00697	0.87609	0.86815	0.780302	0.689266	0.00697326	-0.00517058	-0.0141833	0.0774312	0.0362435	0.101294	NO
Q9UQR1	Zinc finger protein 148	ZNF148	6342.8	6688.7	5831.4	6333.6	5996.3	6851.6	6421	6872.4	6091.8	5797.9	6828.62	6751.27	6599.25	5948.4	5706.9	1	1.05453	0.919373	0.99855	0.945371	1.07659	1.0644	1.04043	0.937819	0.899744	0.0765942	0.00986396	0.121059	-0.0607309	-0.0456269	0.101159	NO
Q9P1Z2	Calcium-binding and coiled-coil domain-containing protein 1	CALCOCO1	149190	132540	107590	69836	69087	151520	131560	119920	75988	65674	151012	138327	115154	74199.2	64643.2	1	0.888397	0.721161	0.468101	0.463081	1.01221	0.927186	0.771859	0.497347	0.433294	0.0122116	0.0387882	0.0506983	0.029246	-0.0297862	0.101158	NO
Q9NRR5	Ubiquilin-4	UBQLN4	251010	223410	221140	169770	172970	264290	212890	220440	191120	180980	263404	223840	211678	186621	178139	1	0.890044	0.881001	0.676348	0.689096	1.04938	0.891757	0.843307	0.74348	0.70969	0.0493751	0.0017132	-0.037694	0.0671326	0.0205944	0.101121	NO
Q8TCD5	5(3)-deoxyribonucleotidase, cytosolic type	NT5C	224020	199400	201560	160370	160830	225060	198870	212060	166220	172190	224305	209099	203631	162307	169487	1	0.890099	0.899741	0.715874	0.717927	1.00127	0.933394	0.908988	0.724521	0.756572	0.00127316	0.0432948	0.00924689	0.008647	0.0386455	0.101107	NO
Q9H496	Torsin-1A-interacting protein 2, isoform IFRG15	TOR1AIP2	8613.9	6497.8	5522.1	5858.1	5021	9967.7	7792	6488.9	4497.1	3692.4	9934.27	8192.78	6230.99	4391.24	3634.45	1	0.754339	0.641069	0.680075	0.582895	1.15328	0.951112	0.723365	0.509785	0.421928	0.153284	0.196773	0.0822964	-0.17029	-0.160967	0.101096	NO
P49914	5-formyltetrahydrofolate cyclo-ligase	MTHFS	250090	210260	184420	113060	97047	246130	200970	200000	133510	102740	245305	211307	192051	130367	101127	1	0.840737	0.737415	0.452077	0.388048	0.980865	0.844924	0.767927	0.521281	0.404364	-0.0191349	0.00418619	0.0305123	0.0692035	0.0163158	0.101083	NO
Q9NVS9	Pyridoxine-5-phosphate oxidase	PNPO	152760	135690	137690	110950	109890	159360	134070	143450	113780	115590	158826	140966	137748	111102	113776	1	0.888256	0.901349	0.726303	0.719364	1.03971	0.922793	0.901731	0.727295	0.744801	0.0397064	0.0345373	0.000382651	0.000992168	0.0254368	0.101055	NO
Q9UHD1	Cysteine and histidine-rich domain-containing protein 1	CHORDC1	1609000	1364000	1436700	1113800	1080800	1621900	1317200	1513400	1210200	1148400	1.61646e+06	1.38495e+06	1.45325e+06	1.18171e+06	1.13038e+06	1	0.847732	0.892915	0.692231	0.671722	1.00464	0.860752	0.9032	0.734438	0.702533	0.0046368	0.0130208	0.010285	0.0422071	0.0308111	0.100961	NO
Q86W50	Methyltransferase-like protein 16	METTL16	262210	248770	237610	188340	195150	261960	236430	238690	211580	216430	261081	248591	229203	206599	213033	1	0.948743	0.906182	0.718279	0.744251	0.995696	0.94806	0.87412	0.787915	0.812452	-0.00430395	-0.000683368	-0.0320619	0.0696362	0.068201	0.100788	NO
Q9NUD5	Zinc finger CCHC domain-containing protein 3	ZCCHC3	120010	107430	99608	77877	72868	119490	110050	104490	78924	78917	119089	115710	100337	77066.1	77678.3	1	0.895175	0.829998	0.648921	0.607183	0.992328	0.964173	0.836072	0.642164	0.647266	-0.00767216	0.0689979	0.0060741	-0.00675701	0.0400828	0.100726	NO
P36955	Pigment epithelium-derived factor	SERPINF1	75244	69984	68615	59088	55572	79072	65964	69857	62133	61126	78806.8	69356.9	67080.5	60670.4	60166.6	1	0.930094	0.9119	0.785285	0.738557	1.04735	0.921759	0.891506	0.806315	0.79962	0.0473502	-0.00833464	-0.020394	0.0210297	0.0610625	0.100714	NO
Q5TFE4	5-nucleotidase domain-containing protein 1	NT5DC1	745520	656380	665330	495340	451390	742660	632710	699810	549230	482880	740169	665254	671995	536301	475301	1	0.880432	0.892437	0.664422	0.60547	0.992823	0.892335	0.901378	0.719365	0.637543	-0.0071771	0.0119025	0.00894065	0.0549427	0.0320727	0.100681	NO
Q96CT7	Coiled-coil domain-containing protein 124	CCDC124	693760	633690	655850	539610	523740	766330	613090	623810	571970	559350	763760	644624	599016	558506	550571	1	0.913414	0.945356	0.777805	0.75493	1.1009	0.929175	0.863434	0.805041	0.793604	0.100899	0.015761	-0.0819215	0.0272364	0.0386742	0.10065	NO
Q8IXW5	Putative RNA polymerase II subunit B1 CTD phosphatase RPAP2	RPAP2	144850	114720	103770	76880	66036	157900	105990	106380	84891	68013	157370	111442	102152	82892.6	66945.5	1	0.791992	0.716396	0.530756	0.455892	1.08644	0.769359	0.705225	0.572265	0.462171	0.0864373	-0.022633	-0.0111713	0.0415093	0.00627882	0.100421	NO
Q9NY27	Serine/threonine-protein phosphatase 4 regulatory subunit 2	PPP4R2	771540	663280	689070	522400	522060	791940	651980	666350	608130	545850	789284	685515	639865	593814	537282	1	0.859683	0.89311	0.677087	0.676647	1.023	0.888502	0.829335	0.769648	0.696377	0.0229982	0.0288186	-0.0637746	0.0925608	0.01973	0.100333	NO
Q12962	Transcription initiation factor TFIID subunit 10	TAF10	131830	124350	120010	95519	96845	134830	121120	121100	110850	97016	134378	127350	116287	108241	95493.3	1	0.94326	0.910339	0.724562	0.73462	1.01933	0.966016	0.882096	0.821061	0.724367	0.0193265	0.0227553	-0.0282426	0.0964996	-0.0102536	0.100085	NO
P27144	Adenylate kinase 4, mitochondrial	AK4	218270	197960	170500	140860	103150	230010	191670	183850	142270	108040	229239	201529	176543	138921	106344	1	0.90695	0.781143	0.645348	0.47258	1.05025	0.923299	0.808827	0.636464	0.487214	0.0502525	0.0163494	0.0276846	-0.00888397	0.0146343	0.100037	NO
Q9GZN8	UPF0687 protein C20orf27	C20orf27	45028	39739	39913	34238	28606	46411	40442	40094	34334	31721	46255.4	42522.1	38500.4	33525.8	31223.1	1	0.88254	0.886404	0.760371	0.635294	1.02726	0.944349	0.855033	0.744554	0.693416	0.0272575	0.0618091	-0.031371	-0.0158177	0.058122	0.0999999	NO
Q5F1R6	DnaJ homolog subfamily C member 21	DNAJC21	31616	25073	16866	12775	10535	35720	22985	19761	12000	9713.3	35600.2	24167.2	18975.6	11717.5	9560.84	1	0.793048	0.533464	0.404068	0.333217	1.12602	0.764399	0.600189	0.37062	0.302405	0.126019	-0.0286489	0.0667251	-0.0334478	-0.0308122	0.0998349	NO
Q9HBF4	Zinc finger FYVE domain-containing protein 1	ZFYVE1	5016	4078.2	4216.1	4020.7	2103.5	5499.5	3882.7	5083.5	2882.4	2718.1	5481.06	4082.41	4881.45	2814.55	2675.44	1	0.813038	0.84053	0.801575	0.419358	1.09271	0.813877	0.973176	0.561114	0.533381	0.0927146	0.000838772	0.132646	-0.240461	0.114023	0.0997607	NO
Q9H9H4	Vacuolar protein sorting-associated protein 37B	VPS37B	103000	91690	95571	73756	67573	111150	88786	99515	80314	64767	110777	93352.7	95559.7	78423.4	63750.4	1	0.890194	0.927874	0.716078	0.656049	1.07551	0.906337	0.927764	0.761392	0.618936	0.0755071	0.0161429	-0.000109816	0.0453143	-0.0371123	0.0997422	NO
Q562E7	WD repeat-containing protein 81	WDR81	81201	77302	62718	40237	36641	92179	71121	66695	41340	35691	91869.9	74779.1	64044.1	40366.8	35130.8	1	0.951983	0.77238	0.495523	0.451238	1.13139	0.920914	0.788711	0.497122	0.43264	0.131388	-0.0310696	0.0163317	0.00159895	-0.0185982	0.0996511	NO
P30086	Phosphatidylethanolamine-binding protein 1;Hippocampal cholinergic neurostimulating peptide	PEBP1	1098900	988240	1003300	823120	901390	1155500	970710	957300	911290	958060	1.15162e+06	1.02064e+06	919251	889838	943023	1	0.899299	0.913004	0.74904	0.820266	1.04798	0.928782	0.836519	0.809753	0.858151	0.0479796	0.0294828	-0.0764844	0.0607133	0.0378857	0.0995769	NO
Q9UN36	Protein NDRG2	NDRG2	207180	178950	180230	139920	144730	215600	174180	173780	157790	155100	214877	183139	166873	154076	152666	1	0.863742	0.86992	0.675355	0.698571	1.03715	0.883961	0.805449	0.74368	0.736874	0.037151	0.020219	-0.0644707	0.0683249	0.0383029	0.0995271	NO
Q9H1H9	Kinesin-like protein KIF13A	KIF13A	434620	388040	374580	312090	314410	480060	371070	383430	339330	303590	478450	390156	368190	331342	298825	1	0.892826	0.861856	0.718076	0.723414	1.10085	0.897695	0.847154	0.762372	0.687555	0.100847	0.00486872	-0.014702	0.0442962	-0.0358591	0.0994506	NO
O15511	Actin-related protein 2/3 complex subunit 5	ARPC5	465560	399970	410780	298370	290350	433440	392840	429790	342680	324060	431986	413046	412708	334613	318974	1	0.859116	0.882335	0.640884	0.623658	0.927885	0.887202	0.886476	0.718733	0.68514	-0.0721145	0.0280861	0.00414043	0.0778485	0.0614822	0.0994427	NO
Q9UJY5	ADP-ribosylation factor-binding protein GGA1	GGA1	512470	465100	468580	395270	369780	537850	442600	489100	416220	390800	536046	465365	469660	406422	384666	1	0.907565	0.914356	0.771304	0.721564	1.04601	0.908083	0.916464	0.793065	0.750612	0.046005	0.000517494	0.00210801	0.0217612	0.0290478	0.0994396	NO
Q8WZA0	Protein LZIC	LZIC	463300	435980	423090	345320	381400	497960	418330	396250	389420	404460	496290	439847	380501	380253	398112	1	0.941032	0.91321	0.745349	0.823225	1.07121	0.949378	0.821284	0.820749	0.859296	0.0712065	0.00834636	-0.091926	0.0754001	0.036071	0.099098	NO
Q9HAU0	Pleckstrin homology domain-containing family A member 5	PLEKHA5	99445	87089	85490	68961	68771	102250	86066	88247	74139	71145	101907	90492.8	84739.5	72393.7	70028.3	1	0.87575	0.859671	0.693459	0.691548	1.02476	0.909979	0.852125	0.727978	0.704192	0.0247582	0.0342281	-0.00754643	0.0345189	0.0126435	0.0986023	NO
O95373	Importin-7	IPO7	1161900	1046300	1017300	786090	777750	1164400	998070	1012400	898940	857460	1.16049e+06	1.04941e+06	972161	877779	844002	1	0.900508	0.875549	0.676556	0.669378	0.998791	0.903181	0.8367	0.755468	0.726398	-0.00120928	0.00267311	-0.0388491	0.0789126	0.05702	0.0985473	NO
Q9BXR0	Queuine tRNA-ribosyltransferase	QTRT1	229900	201320	213670	155150	136090	243840	198980	211260	176910	133020	243022	209215	202863	172745	130932	1	0.875685	0.929404	0.674859	0.591953	1.05708	0.910024	0.882398	0.751394	0.569518	0.057078	0.0343391	-0.0470062	0.0765352	-0.0224352	0.0985111	NO
Q7L1V2	Vacuolar fusion protein MON1 homolog B	MON1B	125140	120020	103900	75099	75850	115230	123120	108810	84704	82068	114844	129453	104485	82710	80779.9	1	0.959086	0.83027	0.60012	0.606121	0.917721	1.03446	0.834947	0.66094	0.645516	-0.0822794	0.0753771	0.00467677	0.0608201	0.0393949	0.0979895	NO
Q12959	Disks large homolog 1	DLG1	324750	298770	299300	248410	236380	320340	300080	302420	256870	267590	319266	315515	290400	250823	263390	1	0.92	0.921632	0.764927	0.727883	0.983112	0.971562	0.894226	0.772358	0.811055	-0.0168878	0.0515617	-0.0274055	0.00743081	0.0831716	0.0978707	NO
P07737	Profilin-1	PFN1	1515500	1441800	1341500	1197700	1123900	1572000	1406200	1344700	1203600	1276900	1.56673e+06	1.47853e+06	1.29125e+06	1.17527e+06	1.25686e+06	1	0.951369	0.885186	0.7903	0.741603	1.0338	0.975604	0.852031	0.775498	0.829336	0.0338027	0.024235	-0.0331549	-0.0148026	0.0877322	0.0978123	NO
P53611	Geranylgeranyl transferase type-2 subunit beta	RABGGTB	170710	151460	142480	108580	91882	173100	152800	146690	114100	97889	172519	160659	140860	111414	96352.6	1	0.887236	0.834632	0.636049	0.538234	1.0106	0.941124	0.82514	0.652651	0.564422	0.0105997	0.0538884	-0.00949167	0.0166014	0.0261881	0.0977859	NO
Q13905	Rap guanine nucleotide exchange factor 1	RAPGEF1	116380	109160	104010	89355	82391	111690	113940	108340	98558	82578	111315	119801	104034	96237.9	81281.9	1	0.937962	0.89371	0.767787	0.707948	0.956482	1.02939	0.893916	0.826928	0.698418	-0.0435176	0.0914291	0.000205633	0.0591416	-0.00953017	0.0977286	NO
Q02218	2-oxoglutarate dehydrogenase, mitochondrial	OGDH	480300	437980	373280	238270	164130	509810	420610	405890	242660	166340	508100	442244	389758	236948	163729	1	0.911888	0.777181	0.496086	0.341724	1.05788	0.920766	0.811488	0.493333	0.340889	0.057881	0.00887808	0.0343068	-0.00275314	-0.000834531	0.0974782	NO
Q9H7Z7	Prostaglandin E synthase 2;Prostaglandin E synthase 2 truncated form	PTGES2	172860	144920	132250	102660	83615	182530	144650	135420	109010	83952	181918	152090	130038	106444	82634.3	1	0.838366	0.76507	0.593891	0.483715	1.0524	0.879846	0.752271	0.615781	0.478042	0.0523999	0.0414792	-0.0127987	0.0218897	-0.0056733	0.0972968	NO
A4D126	Isoprenoid synthase domain-containing protein	ISPD	147660	142250	133720	115710	111350	153480	129830	138350	122110	125450	152965	136508	132851	119235	123481	1	0.963362	0.905594	0.783625	0.754097	1.03593	0.924474	0.89971	0.8075	0.836252	0.035929	-0.0388878	-0.00588407	0.0238756	0.0821548	0.0971875	NO
Q9NV35	Probable 8-oxo-dGTP diphosphatase NUDT15	NUDT15	195230	166190	172870	119810	118020	191190	159540	173560	141660	129850	190549	167746	166662	138325	127812	1	0.851252	0.885468	0.613686	0.604518	0.976022	0.859222	0.853669	0.708525	0.654674	-0.0239779	0.00796991	-0.0317999	0.0948382	0.0501558	0.0971861	NO
Q5VT52	Regulation of nuclear pre-mRNA domain-containing protein 2	RPRD2	292050	266490	256700	189370	173650	299250	252830	270900	213050	177170	298246	265834	260133	208035	174389	1	0.912481	0.878959	0.648416	0.59459	1.02122	0.910236	0.890713	0.712326	0.597121	0.0212169	-0.00224499	0.0117543	0.0639093	0.00253104	0.0971665	NO
Q9BR76	Coronin-1B	CORO1B	744850	613450	582930	457440	469920	711380	614730	574990	552520	501700	708994	646349	552137	539513	493825	1	0.823589	0.782614	0.614137	0.630892	0.951862	0.867757	0.741272	0.724325	0.662986	-0.0481382	0.0441683	-0.0413419	0.110188	0.0320943	0.0969703	NO
Q9NPG3	Ubinuclein-1	UBN1	94273	80824	81410	68195	63626	91236	79574	86612	76192	66337	90930	83666.9	83169.5	74398.4	65295.8	1	0.85734	0.863556	0.723378	0.674912	0.964539	0.887496	0.88222	0.78918	0.692625	-0.0354606	0.030156	0.0186642	0.0658025	0.0177123	0.0968745	NO
Q5JTD0	Tight junction-associated protein 1	TJAP1	72011	59623	43606	27444	24360	77749	52709	46524	29645	27928	77488.3	55420.1	44674.9	28947.1	27489.7	1	0.827971	0.605546	0.381108	0.338282	1.07606	0.769606	0.620389	0.401982	0.381742	0.0760613	-0.0583648	0.014843	0.0208738	0.0434607	0.0968741	NO
Q9H3P7	Golgi resident protein GCP60	ACBD3	340620	290360	259300	194820	179810	353190	281300	269260	216130	183320	352006	295769	258558	211042	180443	1	0.852446	0.761259	0.571957	0.52789	1.03343	0.868325	0.759081	0.619583	0.529748	0.0334258	0.015879	-0.00217831	0.0476255	0.00185738	0.0966094	NO
Q86WR0	Coiled-coil domain-containing protein 25	CCDC25	309370	280600	274900	225360	225020	320650	273400	274740	246660	237120	319575	287462	263820	240854	233398	1	0.907005	0.88858	0.728448	0.727349	1.03299	0.929186	0.852766	0.778529	0.754431	0.0329852	0.0221818	-0.035814	0.0500808	0.0270816	0.0965154	NO
Q8NCP5	Zinc finger and BTB domain-containing protein 44	ZBTB44	32692	29283	27850	31555	20295	34538	31319	32810	26191	20709	34422.2	32929.9	31505.9	25574.5	20384	1	0.895724	0.85189	0.965221	0.620794	1.05292	1.00728	0.96372	0.782285	0.623515	0.0529233	0.111553	0.11183	-0.182936	0.00272108	0.0960912	NO
P15374	Ubiquitin carboxyl-terminal hydrolase isozyme L3	UCHL3	308060	285340	269840	156310	103080	312840	287650	274950	182850	96886	311791	302445	264022	178546	95365.3	1	0.926248	0.875933	0.507401	0.33461	1.01211	0.981774	0.857047	0.579581	0.309567	0.0121107	0.0555259	-0.0188864	0.0721795	-0.0250428	0.095887	NO
O60701	UDP-glucose 6-dehydrogenase	UGDH	624560	579770	562870	431540	467270	602100	568550	550700	480560	538280	600081	597793	528812	469247	529831	1	0.928286	0.901226	0.69095	0.748159	0.960806	0.957143	0.846695	0.751325	0.848327	-0.0391944	0.0288578	-0.0545313	0.0603743	0.100169	0.0956751	NO
Q13137	Calcium-binding and coiled-coil domain-containing protein 2	CALCOCO2	161580	137690	147770	121590	106440	162320	136780	153500	128850	113490	161776	143815	147399	125817	111709	1	0.852148	0.914532	0.752506	0.658745	1.00121	0.890056	0.912235	0.778666	0.691352	0.0012107	0.0379088	-0.00229603	0.0261592	0.0326073	0.09559	NO
Q9UKT5	F-box only protein 4	FBXO4	309580	282570	290800	226420	223360	315360	273590	286800	256320	238370	314302	287662	275401	250286	234629	1	0.912753	0.939337	0.731378	0.721494	1.01525	0.929201	0.889595	0.80847	0.757893	0.0152541	0.0164486	-0.049742	0.0770919	0.0363997	0.0954523	NO
Q13610	Periodic tryptophan protein 1 homolog	PWP1	59513	39424	38071	30326	31530	58261	36974	37156	39528	33858	58065.6	38875.8	35679.2	38597.5	33326.6	1	0.662443	0.639709	0.509569	0.5298	0.975679	0.653231	0.599519	0.648556	0.559988	-0.0243206	-0.00921205	-0.0401895	0.138986	0.0301879	0.0954521	NO
P61960	Ubiquitin-fold modifier 1	UFM1	167650	139040	137670	102860	96705	158060	140930	141830	130350	92188	157530	148179	136193	127281	90741	1	0.829347	0.821175	0.61354	0.576827	0.939636	0.883858	0.812364	0.75921	0.541253	-0.0603644	0.0545109	-0.00881096	0.14567	-0.0355739	0.0954313	NO
A6NGB9	WAS/WASL-interacting protein family member 3	WIPF3	111030	101770	94475	81697	75156	114710	97309	96605	83281	85334	114325	102314	92765.3	81320.5	83994.6	1	0.916599	0.850896	0.73581	0.676898	1.02968	0.9215	0.835498	0.732419	0.756504	0.0296793	0.00490051	-0.0153981	-0.00339075	0.0796057	0.0953967	NO
Q9Y3D6	Mitochondrial fission 1 protein	FIS1	65070	74607	59846	45142	50635	55433	69262	63009	50150	64968	55247.1	72824.5	60504.7	48969.4	63948.3	1	1.14657	0.919717	0.693745	0.778162	0.849041	1.11917	0.929839	0.752566	0.982761	-0.150959	-0.0273935	0.0101222	0.0588204	0.204599	0.0951894	NO
P51991	Heterogeneous nuclear ribonucleoprotein A3	HNRNPA3	753270	664430	553960	364020	252220	829420	624860	582650	401370	228130	826638	657000	559492	391922	224549	1	0.882061	0.735407	0.483253	0.334833	1.0974	0.872197	0.742751	0.520294	0.298099	0.0973998	-0.00986396	0.00734407	0.0370406	-0.0367341	0.0951864	NO
Q9NY33	Dipeptidyl peptidase 3	DPP3	1171300	1039400	1079400	846030	876650	1203500	1010000	1050100	943220	947640	1.19946e+06	1.06195e+06	1.00836e+06	921016	932766	1	0.88739	0.92154	0.7223	0.748442	1.02404	0.906642	0.860892	0.78632	0.796351	0.0240449	0.0192517	-0.0606481	0.0640196	0.0479093	0.0945773	NO
[truncated: 3,917 more rows]

## Sheet: TPP
Protein IDs	Protein names	Gene names	Reporter intensity corrected 0	Reporter intensity corrected 1	Reporter intensity corrected 2	Reporter intensity corrected 3	Reporter intensity corrected 4	Reporter intensity corrected 5	Reporter intensity corrected 6	Reporter intensity corrected 7	Reporter intensity corrected 8	Reporter intensity corrected 9	Normalized 5	Normalized 6	Normalized 7	Normalized 8	Normalized 9	Vehicel_1	Vehicel_2	Vehicel_3	Vehicel_4	Vehicel_5	Drug_6	Drug_7	Drug_8	Drug_9	Drug_10	Distance1	Distance2	Distance3	Distance4	Distance5	Distance sum	kinase?
[truncated: 5,592 more rows]

[truncated: 1 more sheets: SIP]
