# Supplementary material for: Highly effective identification of drug targets at the proteome level by pH-dependent protein precipitation
Source: Royal Society of Chemistry journal article supplement (doi:10.1039/d2sc03326g), 2022-01-01
Supplement: d2sc03326g4.xlsx [file d2sc03326g4.xlsx]

## Sheet: pHDPP_80%TDR
Protein IDs	Protein names	Gene names	Reporter intensity corrected 0	Reporter intensity corrected 1	Reporter intensity corrected 2	Reporter intensity corrected 3	Reporter intensity corrected 4	Reporter intensity corrected 5	Reporter intensity corrected 6	Reporter intensity corrected 7	Reporter intensity corrected 8	Reporter intensity corrected 9	Normalized 5	Normalized 6	Normalized 7	Normalized 8	Normalized 9	Vehicel_1	Vehicel_2	Vehicel_3	Vehicel_4	Vehicel_5	Drug_6	Drug_7	Drug_8	Drug_9	Drug_10	Distance1	Distance2	Distance3	Distance4	Distance5	Distance sum	kinase?	True+false positive	TRUE	TDR
P46734	Dual specificity mitogen-activated protein kinase kinase 3;Dual specificity mitogen-activated protein kinase kinase 6	MAP2K3;MAP2K6	101660	74491	56349	50986	38756	184980	173070	152450	92407	55736	184360	181972	146391	90231.7	54861.2	1	0.732746	0.554289	0.501535	0.381232	1.81349	1.79	1.44	0.887583	0.539654	0.813492	1.05726	0.885715	0.386049	0.158422	3.30094	YES	1	1	1
Q00535	Cyclin-dependent-like kinase 5	CDK5	381100	274000	139120	93186	80509	471440	428010	439870	331640	236630	469859	450025	422387	323833	232916	1	0.718971	0.365049	0.244518	0.211254	1.2329	1.18086	1.10834	0.849732	0.611167	0.232902	0.461886	0.743288	0.605214	0.399913	2.4432	YES	2	2	1
P05771	Protein kinase C beta type	PRKCB	568460	436880	326620	213800	176610	781500	624400	626500	534050	484850	778879	656516	601599	521478	477240	1	0.768533	0.57457	0.376104	0.310681	1.37016	1.1549	1.0583	0.917353	0.839531	0.370156	0.38637	0.483727	0.541249	0.52885	2.31035	YES	3	3	1
Q00526	Cyclin-dependent kinase 3	CDK3	56012	46270	32532	22504	19224	66782	62606	67827	54424	50565	66558	65826.1	65131.2	53142.8	49771.3	1	0.826073	0.580804	0.401771	0.343212	1.18828	1.17522	1.16281	0.948776	0.888584	0.188282	0.349142	0.582003	0.547005	0.545371	2.2118	YES	4	4	1
P16591	Tyrosine-protein kinase Fer	FER	147090	113530	85477	79906	57595	234150	188480	181800	118470	75036	233365	198174	174574	115681	73858.3	1	0.77184	0.58112	0.543246	0.391563	1.58654	1.3473	1.18685	0.786465	0.50213	0.586544	0.575461	0.605733	0.24322	0.110567	2.12152	YES	5	5	1
Q14680	Maternal embryonic leucine zipper kinase	MELK	19672	16412	11798	11322	12581	35451	26615	23797	15752	11498	35332.1	27983.9	22851.2	15381.2	11317.5	1	0.834282	0.599736	0.575539	0.639538	1.79606	1.42253	1.16161	0.781882	0.575312	0.796061	0.588245	0.561873	0.206344	-0.0642268	2.0883	YES	6	6	1
O14733	Dual specificity mitogen-activated protein kinase kinase 7	MAP2K7	125850	87507	60019	47192	43941	222480	163430	122570	61654	42612	221734	171836	117698	60202.6	41943.2	1	0.695328	0.476909	0.374986	0.349154	1.76189	1.3654	0.935227	0.478368	0.333279	0.76189	0.670076	0.458318	0.103382	-0.0158747	1.97779	YES	7	7	1
Q9UHD2	Serine/threonine-protein kinase TBK1	TBK1	81131	38952	26689	31651	23449	137440	93947	65388	30302	21232	136979	98779.2	62789.1	29588.7	20898.7	1	0.480112	0.328962	0.390122	0.289026	1.68837	1.21753	0.773922	0.364702	0.257593	0.688369	0.737415	0.444961	-0.0254197	-0.0314337	1.81389	YES	8	8	1
Q13043	Serine/threonine-protein kinase 4;Serine/threonine-protein kinase 4 37kDa subunit;Serine/threonine-protein kinase 4 18kDa subunit	STK4	446170	367920	259690	197130	153950	512500	460730	474420	389950	393270	510781	484428	455564	380770	387097	1	0.824618	0.582043	0.441827	0.345048	1.14481	1.08575	1.02105	0.85342	0.867601	0.144813	0.261129	0.439011	0.411593	0.522553	1.7791	YES	9	9	1
Q13555	Calcium/calmodulin-dependent protein kinase type II subunit gamma;Calcium/calmodulin-dependent protein kinase type II subunit alpha;Calcium/calmodulin-dependent protein kinase type II subunit delta;Calcium/calmodulin-dependent protein kinase type II subunit beta	CAMK2G;CAMK2A;CAMK2D;CAMK2B	30982	29597	27108	17435	15466	42478	39725	37796	28540	26978	42335.5	41768.3	36293.8	27868.2	26554.6	1	0.955297	0.87496	0.562746	0.499193	1.36646	1.34815	1.17145	0.899495	0.857096	0.366456	0.392849	0.296487	0.336749	0.357903	1.75044	YES	10	10	1
P27448	MAP/microtubule affinity-regulating kinase 3	MARK3	431210	360370	326110	246310	214570	510050	451190	495110	414850	430840	508339	474397	475431	405084	424078	1	0.835718	0.756267	0.571207	0.4976	1.17887	1.10015	1.10255	0.939413	0.98346	0.178867	0.264435	0.346285	0.368206	0.48586	1.64365	YES	11	11	1
O96013	Serine/threonine-protein kinase PAK 4	PAK4	189790	166280	124310	95998	78996	213850	203940	202340	172900	176480	213133	214430	194298	168830	173710	1	0.876126	0.654987	0.505812	0.416228	1.12299	1.12983	1.02375	0.889561	0.915275	0.122993	0.2537	0.368765	0.38375	0.499046	1.62825	YES	12	12	1
Q05823	2-5A-dependent ribonuclease	RNASEL	931.86	483.53	422.9	332.17	125.8	1643.3	802.97	787.62	345.22	189.85	1637.79	844.271	756.315	337.093	186.87	1	0.518887	0.453824	0.356459	0.134999	1.75755	0.906006	0.811619	0.361742	0.200535	0.757548	0.387119	0.357796	0.00528336	0.0655358	1.57328	YES	13	13	1
Q99986	Serine/threonine-protein kinase VRK1	VRK1	953320	702140	457560	255300	201920	1225300	946160	899560	614610	381230	1.22119e+06	994826	863806	600142	375246	1	0.736521	0.479965	0.267801	0.211807	1.28099	1.04354	0.906103	0.629528	0.393621	0.280987	0.307017	0.426138	0.361727	0.181813	1.55768	YES	14	14	1
Q32MK0	Myosin light chain kinase 3	MYLK3	227170	190380	175270	144140	124270	290750	245430	252550	210330	202920	289775	258054	242512	205379	199735	1	0.838051	0.771537	0.634503	0.547035	1.27559	1.13595	1.06754	0.904075	0.879232	0.275586	0.297899	0.295999	0.269572	0.332196	1.47125	YES	15	15	1
Q7KZI7	Serine/threonine-protein kinase MARK2	MARK2	63127	55117	53349	45028	39123	75492	66889	71206	64029	63659	75238.8	70329.4	68375.9	62521.7	62659.8	1	0.873113	0.845106	0.713292	0.619751	1.19186	1.11409	1.08315	0.990412	0.992599	0.191864	0.240982	0.238042	0.27712	0.372849	1.32086	YES	16	16	1
P53350	Serine/threonine-protein kinase PLK1	PLK1	16175	13559	10543	9188.5	8139.7	21255	15694	18463	13496	10527	21183.7	16501.2	17729.2	13178.3	10361.8	1	0.838269	0.651808	0.568068	0.503227	1.30966	1.02017	1.09608	0.814732	0.640604	0.309658	0.181899	0.444276	0.246664	0.137377	1.31988	YES	17	17	1
O95067	G2/mitotic-specific cyclin-B2	CCNB2	26688	23497	20932	17317	17047	37333	30995	30063	22559	20292	37207.8	32589.2	28868.1	22028	19973.5	1	0.880433	0.784323	0.648868	0.638751	1.39418	1.22112	1.08169	0.825388	0.748408	0.394177	0.340686	0.297367	0.176519	0.109656	1.31841	NO	18	17	0.944444
Q9P289	Serine/threonine-protein kinase 26	STK26	325690	250580	195080	153100	117760	442020	338960	315010	213800	153100	440538	356394	302490	208767	150697	1	0.769382	0.598974	0.470079	0.361571	1.35263	1.09428	0.928766	0.640999	0.462701	0.352629	0.324893	0.329791	0.17092	0.10113	1.27936	YES	19	18	0.947368
Q6ZVK8	8-oxo-dGDP phosphatase NUDT18	NUDT18	6365.9	6311.4	6797.5	5946.1	6084.1	9957	7052.6	7655.5	7487.2	7160.9	9923.61	7415.35	7351.23	7310.95	7048.5	1	0.991439	1.0678	0.934055	0.955733	1.55887	1.16486	1.15478	1.14845	1.10723	0.558869	0.173416	0.0869831	0.2144	0.151495	1.18516	NO	20	18	0.9
Q9NWZ3	Interleukin-1 receptor-associated kinase 4	IRAK4	549360	482890	402000	298990	226960	607670	540190	536880	473010	448690	605632	567975	515541	461875	441647	1	0.879005	0.731761	0.544251	0.413135	1.10243	1.03388	0.93844	0.840751	0.803931	0.102432	0.15488	0.206679	0.2965	0.390796	1.15129	YES	21	19	0.904762
Q8WWW0	Ras association domain-containing protein 5	RASSF5	92554	84661	75214	53923	51310	116340	92975	92420	83113	72964	115950	97757.2	88746.7	81156.5	71818.8	1	0.91472	0.81265	0.582611	0.554379	1.25278	1.05622	0.958864	0.876855	0.775966	0.25278	0.141498	0.146214	0.294244	0.221587	1.05632	NO	22	19	0.863636
Q9UEW8	STE20/SPS1-related proline-alanine-rich protein kinase	STK39	38877	29430	20915	17962	15901	59613	39088	30076	18831	15113	59413.1	41098.5	28880.6	18387.7	14875.8	1	0.757003	0.537979	0.462021	0.409008	1.52823	1.05714	0.742871	0.472971	0.382637	0.528232	0.300139	0.204892	0.0109502	-0.0263706	1.01784	YES	23	20	0.869565
O95747	Serine/threonine-protein kinase OSR1	OXSR1	692300	438220	278810	225740	195430	969700	629640	464160	247730	205480	966448	662026	445712	241898	202255	1	0.632991	0.40273	0.326073	0.282291	1.396	0.95627	0.643813	0.349413	0.292149	0.395996	0.323278	0.241083	0.02334	0.00985822	0.993555	YES	24	21	0.875
P36507	Dual specificity mitogen-activated protein kinase kinase 2	MAP2K2	759490	625830	523150	324020	223390	795060	651350	697200	569870	468010	792394	684852	669489	556455	460664	1	0.824013	0.688817	0.426628	0.294132	1.04332	0.901727	0.881498	0.732669	0.606544	0.0433233	0.0777131	0.192681	0.306041	0.312413	0.932171	YES	25	22	0.88
O14976	Cyclin-G-associated kinase	GAK	393110	326490	261110	174600	162600	439790	399340	393680	239850	194800	438315	419880	378033	234204	191742	1	0.830531	0.664216	0.44415	0.413625	1.11499	1.0681	0.961646	0.595772	0.487758	0.114993	0.237567	0.29743	0.151621	0.0741331	0.875746	YES	26	23	0.884615
P24941	Cyclin-dependent kinase 2	CDK2	391910	326190	310540	214530	165860	396710	351470	369270	326050	319170	395380	369548	354593	318375	314160	1	0.832308	0.792376	0.547396	0.423209	1.00885	0.942941	0.904782	0.812367	0.801614	0.00885292	0.110632	0.112406	0.264971	0.378404	0.875266	YES	27	24	0.888889
P06493	Cyclin-dependent kinase 1	CDK1	1022300	671260	391790	252310	197410	1183200	902440	720480	356730	259190	1.17923e+06	948857	691844	348332	255122	1	0.656617	0.383244	0.246806	0.193104	1.15351	0.928159	0.676752	0.340734	0.249557	0.153509	0.271542	0.293509	0.0939278	0.0564529	0.86894	YES	28	25	0.892857
Q9Y6E0	Serine/threonine-protein kinase 24;Serine/threonine-protein kinase 24 36 kDa subunit;Serine/threonine-protein kinase 24 12 kDa subunit	STK24	518410	453370	389360	281420	222070	566630	504290	501760	402060	344510	564730	530228	481817	392595	339103	1	0.874539	0.751066	0.542852	0.428368	1.08935	1.0228	0.929413	0.757307	0.654121	0.0893495	0.148258	0.178347	0.214454	0.225753	0.856162	YES	29	26	0.896552
P14635	G2/mitotic-specific cyclin-B1	CCNB1	398700	348170	302250	204310	170220	407930	374950	391110	335820	263160	406562	394236	375565	327915	259030	1	0.873263	0.758089	0.51244	0.426938	1.01972	0.988803	0.941974	0.82246	0.649685	0.0197189	0.11554	0.183885	0.310019	0.222748	0.85191	NO	30	26	0.866667
O96017	Serine/threonine-protein kinase Chk2	CHEK2	337980	268200	216280	147190	104620	364190	294250	319350	224370	166340	362969	309385	306657	219088	163729	1	0.793538	0.63992	0.435499	0.309545	1.07394	0.915394	0.907323	0.648228	0.484435	0.0739352	0.121856	0.267404	0.212729	0.17489	0.850814	YES	31	27	0.870968
O14757	Serine/threonine-protein kinase Chk1	CHEK1	360890	321610	275090	209430	129300	432970	333270	329020	268680	228060	431518	350412	315943	262355	224480	1	0.891158	0.762254	0.580315	0.358281	1.1957	0.970966	0.875455	0.726967	0.622019	0.195705	0.0798077	0.1132	0.146652	0.263738	0.799103	YES	32	28	0.875
Q8N4S0	Coiled-coil domain-containing protein 82	CCDC82	20160	19364	19291	15635	14522	34034	22433	19261	16084	13362	33919.9	23586.8	18495.5	15705.4	13152.3	1	0.960516	0.956895	0.775546	0.720337	1.68253	1.16998	0.917433	0.779036	0.652395	0.682533	0.209467	-0.0394616	0.00349081	-0.0679428	0.788086	NO	33	28	0.848485
Q9NQ39	Putative 40S ribosomal protein S10-like	RPS10P5	8579.3	6597.7	6690.3	5816.1	5305.7	13500	6162.1	7055.3	7247.6	5765.7	13454.7	6479.05	6774.88	7076.99	5675.2	1	0.769025	0.779819	0.677922	0.61843	1.56828	0.755195	0.789678	0.824891	0.6615	0.568278	-0.01383	0.00985872	0.146969	0.0430692	0.754344	NO	34	28	0.823529
P41240	Tyrosine-protein kinase CSK	CSK	552960	514820	465310	335260	298920	570300	565780	551680	452450	454050	568387	594881	529753	441799	446923	1	0.931026	0.841489	0.606301	0.540582	1.0279	1.07581	0.958031	0.798971	0.808238	0.0278996	0.144786	0.116542	0.192671	0.267657	0.749555	YES	35	29	0.828571
Q13188	Serine/threonine-protein kinase 3;Serine/threonine-protein kinase 3 36kDa subunit;Serine/threonine-protein kinase 3 20kDa subunit	STK3	327980	288700	258930	188280	157550	339240	304760	307110	268360	248680	338102	320435	294904	262043	244777	1	0.880237	0.789469	0.574059	0.480365	1.03086	0.976997	0.899151	0.798959	0.746316	0.0308625	0.0967601	0.109682	0.2249	0.265952	0.728157	YES	36	30	0.833333
Q5VT25	Serine/threonine-protein kinase MRCK alpha	CDC42BPA	318570	241940	158460	127020	107560	375270	277030	263570	162220	109450	374011	291279	253094	158401	107732	1	0.759456	0.49741	0.398719	0.337634	1.17403	0.914333	0.79447	0.497226	0.338174	0.174032	0.154877	0.297059	0.0985066	0.000540239	0.725015	YES	37	31	0.837838
Q9BUL8	Programmed cell death protein 10	PDCD10	328060	294780	261630	216280	182520	389100	324600	318800	253670	237770	387795	341296	306129	247698	234038	1	0.898555	0.797507	0.65927	0.556362	1.18209	1.04035	0.933149	0.75504	0.7134	0.182086	0.141791	0.135643	0.0957705	0.157038	0.712328	NO	38	31	0.815789
P25098	Beta-adrenergic receptor kinase 1	ADRBK1	318510	289130	256470	186150	167400	340800	301060	301030	253100	254230	339657	316545	289065	247142	250240	1	0.907758	0.805218	0.58444	0.525572	1.06639	0.993831	0.907555	0.775931	0.785657	0.0663937	0.0860729	0.102337	0.191491	0.260085	0.70638	YES	39	32	0.820513
P19525	Interferon-induced, double-stranded RNA-activated protein kinase	EIF2AK2	248480	156390	126570	106510	90760	329230	200020	166580	108200	98885	328126	210308	159959	105653	97332.9	1	0.629387	0.509377	0.428646	0.365261	1.32053	0.846378	0.643751	0.425197	0.391713	0.320532	0.216992	0.134374	-0.00344929	0.0264525	0.694901	YES	40	33	0.825
Q8IU85	Calcium/calmodulin-dependent protein kinase type 1D	CAMK1D	26142	20561	17629	14528	11386	30682	21588	20882	18694	16848	30579.1	22698.4	20052	18253.9	16583.6	1	0.786512	0.674355	0.555734	0.435544	1.16973	0.868273	0.767043	0.698261	0.634365	0.169731	0.0817605	0.0926871	0.142527	0.19882	0.685525	YES	41	34	0.829268
Q96GX5	Serine/threonine-protein kinase greatwall	MASTL	64650	52332	49153	34294	29444	67186	55191	61445	48808	42284	66960.7	58029.8	59002.8	47659	41620.3	1	0.809466	0.760294	0.530456	0.455437	1.03574	0.897599	0.91265	0.737185	0.643779	0.0357413	0.0881324	0.152356	0.206729	0.188342	0.671301	YES	42	35	0.833333
O15530	3-phosphoinositide-dependent protein kinase 1;Putative 3-phosphoinositide-dependent protein kinase 2	PDPK1;PDPK2P	355180	307570	278410	177990	128230	363320	318940	328710	263930	217950	362102	335345	315645	257717	214529	1	0.865955	0.783856	0.501126	0.361028	1.01949	0.944154	0.888691	0.725595	0.604001	0.0194874	0.078199	0.104835	0.224469	0.242973	0.669963	YES	43	36	0.837209
P11802	Cyclin-dependent kinase 4	CDK4	94896	80317	70324	58411	54046	121730	89093	84150	67768	59467	121322	93675.5	80805.4	66172.7	58533.6	1	0.846369	0.741064	0.615526	0.569529	1.27847	0.987139	0.851515	0.697318	0.616819	0.278471	0.14077	0.110451	0.0817917	0.0472899	0.658774	YES	44	37	0.840909
P15735	Phosphorylase b kinase gamma catalytic chain, liver/testis isoform	PHKG2	50470	39082	31255	23316	18143	56101	41355	44216	30798	23093	55912.9	43482.1	42458.6	30073	22730.5	1	0.774361	0.619279	0.461977	0.359481	1.10784	0.861544	0.841264	0.595859	0.450377	0.107843	0.0871825	0.221985	0.133882	0.0908964	0.641789	YES	45	38	0.844444
P07948	Tyrosine-protein kinase Lyn	LYN	147960	133980	127120	108400	92970	156430	138420	152500	130840	129310	155905	145540	146439	127760	127280	1	0.905515	0.859151	0.73263	0.628345	1.0537	0.983642	0.989719	0.863476	0.860235	0.0536995	0.0781269	0.130567	0.130846	0.23189	0.625129	YES	46	39	0.847826
P49841	Glycogen synthase kinase-3 beta	GSK3B	393750	348830	320040	256030	218260	411620	358510	366240	328510	323390	410240	376950	351683	320777	318314	1	0.885917	0.8128	0.650235	0.554311	1.04188	0.957333	0.893164	0.814671	0.808417	0.0418782	0.0714159	0.0803644	0.164436	0.254106	0.6122	YES	47	40	0.851064
P50750	Cyclin-dependent kinase 9	CDK9	314070	261190	238880	193480	140150	355230	262740	285460	235730	203400	354039	276254	274114	230181	200207	1	0.83163	0.760595	0.616041	0.446238	1.12726	0.879594	0.87278	0.732896	0.637461	0.12726	0.0479641	0.112186	0.116855	0.191223	0.595489	YES	48	41	0.854167
Q9NSY1	BMP-2-inducible protein kinase	BMP2K	668200	565580	514320	340980	288560	685130	565160	580270	491500	468150	682832	594229	557207	479930	460802	1	0.846423	0.76971	0.510296	0.431847	1.0219	0.889298	0.833892	0.718243	0.689617	0.021898	0.042875	0.0641824	0.207946	0.25777	0.594672	YES	49	42	0.857143
A5D8V6	Vacuolar protein sorting-associated protein 37C	VPS37C	20680	19777	18520	13251	13260	23925	20902	23176	15650	14478	23844.8	21977.1	22254.8	15281.6	14250.8	1	0.956335	0.895551	0.640764	0.641199	1.15303	1.06272	1.07615	0.738955	0.689108	0.153035	0.106388	0.180602	0.0981911	0.047909	0.586125	NO	50	42	0.84
Q8IYK4	Procollagen galactosyltransferase 2	COLGALT2	10932	11203	10619	9384.2	7187.6	13993	12519	11889	8993.8	8465.4	13946.1	13162.9	11416.5	8782.08	8332.53	1	1.02479	0.971368	0.858416	0.657483	1.27571	1.20407	1.04432	0.803337	0.762215	0.275711	0.179283	0.0729474	-0.0550785	0.104732	0.577594	NO	51	42	0.823529
P22694	cAMP-dependent protein kinase catalytic subunit beta	PRKACB	8195.1	7640.2	6431.1	5921	5390.3	8506.8	7565.5	8844.9	7616.7	5999.8	8478.27	7954.63	8493.35	7437.4	5905.63	1	0.932289	0.784749	0.722505	0.657747	1.03455	0.970657	1.03639	0.907542	0.720629	0.0345537	0.0383684	0.251644	0.185037	0.0628826	0.572486	YES	52	43	0.826923
P49840	Glycogen synthase kinase-3 alpha	GSK3A	134830	123710	118170	90292	93534	139710	129550	137390	116770	116540	139241	136213	131929	114021	114711	1	0.917526	0.876437	0.669673	0.693718	1.03272	1.01026	0.978486	0.845666	0.850781	0.0327186	0.0927347	0.102049	0.175993	0.157063	0.560559	YES	53	44	0.830189
O94804	Serine/threonine-protein kinase 10	STK10	100940	88153	78397	44118	28863	105770	86932	95467	65117	45692	105415	91403.4	91672.6	63584.1	44974.8	1	0.873321	0.776669	0.437072	0.285942	1.04434	0.905522	0.908189	0.62992	0.44556	0.044336	0.0322009	0.13152	0.192848	0.159618	0.560523	YES	54	45	0.833333
P17252	Protein kinase C alpha type	PRKCA	238020	191860	147770	88512	49985	218600	186500	176460	134440	135590	217867	196093	169446	131275	133462	1	0.806067	0.62083	0.371868	0.210003	0.91533	0.823849	0.7119	0.55153	0.560717	-0.0846699	0.0177828	0.0910698	0.179662	0.350713	0.554558	YES	55	46	0.836364
Q96MX0	CKLF-like MARVEL transmembrane domain-containing protein 3	CMTM3	12737	10938	9828.1	6914.5	7344.5	15550	10500	11114	9356.7	8511.6	15497.8	11040.1	10672.3	9136.44	8378	1	0.858758	0.771618	0.542867	0.576627	1.21676	0.866772	0.837895	0.717315	0.657769	0.216758	0.00801359	0.0662765	0.174448	0.0811419	0.546638	NO	56	46	0.821429
Q92844	TRAF family member-associated NF-kappa-B activator	TANK	36745	29287	27890	21992	23160	41120	32490	33719	27848	24392	40982.1	34161.1	32378.8	27192.4	24009.2	1	0.797034	0.759015	0.598503	0.63029	1.11531	0.929681	0.881176	0.740031	0.653399	0.115311	0.132647	0.122161	0.141528	0.0231093	0.534756	NO	57	46	0.807018
Q2M2I8	AP2-associated protein kinase 1	AAK1	103180	88501	80661	64205	50263	100470	85036	95838	83210	79575	100133	89409.8	92028.8	81251.2	78326	1	0.857734	0.78175	0.622262	0.487139	0.97047	0.866542	0.891925	0.78747	0.75912	-0.0295304	0.0088083	0.110175	0.165208	0.271981	0.526642	YES	58	47	0.810345
Q9Y2K2	Serine/threonine-protein kinase SIK3	SIK3	109270	100140	87121	66060	63019	114380	109860	103860	76321	80619	113996	115511	99732	74524.4	79353.6	1	0.916446	0.7973	0.604558	0.576727	1.04325	1.05711	0.912712	0.68202	0.726216	0.0432543	0.140667	0.115411	0.0774629	0.149489	0.526284	YES	59	48	0.813559
Q9H2G2	STE20-like serine/threonine-protein kinase	SLK	1453100	1196200	1127600	819440	664730	1551200	1252600	1324200	1049800	877610	1.546e+06	1.31703e+06	1.27157e+06	1.02509e+06	863835	1	0.823206	0.775996	0.563925	0.457456	1.06393	0.906357	0.875073	0.705448	0.594478	0.0639307	0.0831517	0.0990768	0.141523	0.137021	0.524703	YES	60	49	0.816667
Q9BVS4	Serine/threonine-protein kinase RIO2	RIOK2	236210	181650	137190	101920	87917	284260	205900	176960	108310	92565	283307	216490	169927	105760	91112.1	1	0.769019	0.580797	0.43148	0.372198	1.19938	0.916517	0.719388	0.447739	0.385725	0.199385	0.147498	0.138591	0.0162581	0.0135266	0.515258	YES	61	50	0.819672
Q96FX2	DPH3 homolog	DPH3	106290	86499	86004	65623	71583	113730	89736	100530	88819	80942	113349	94351.6	96534.3	86728.2	79671.6	1	0.813802	0.809145	0.617396	0.673469	1.06641	0.887681	0.908217	0.815958	0.749568	0.0664087	0.0738789	0.0990718	0.198562	0.0760989	0.51402	NO	62	50	0.806452
P53778	Mitogen-activated protein kinase 12	MAPK12	45854	42593	38386	35121	25735	52137	40357	46927	39067	34087	51962.1	42432.8	45061.8	38147.3	33552	1	0.928883	0.837135	0.765931	0.561238	1.13321	0.925389	0.982724	0.831931	0.731713	0.133209	-0.00349438	0.145589	0.0659996	0.170475	0.511778	YES	63	51	0.809524
Q9UJK0	Ribosome biogenesis protein TSR3 homolog	TSR3	12210	12583	10781	10333	9093.4	18430	13030	10865	9397.3	9718.5	18368.2	13700.2	10433.2	9176.08	9565.96	1	1.03055	0.882965	0.846274	0.74475	1.50436	1.12205	0.854477	0.751522	0.783453	0.504356	0.0914988	-0.028488	-0.0947516	0.0387028	0.511318	NO
P30281	G1/S-specific cyclin-D3	CCND3	105830	92495	78286	56258	47544	109740	105150	94409	69324	56800	109372	110558	90656.6	67692.1	55908.5	1	0.873996	0.739734	0.531588	0.449249	1.03347	1.04468	0.856625	0.63963	0.528286	0.0334684	0.170683	0.116892	0.108042	0.079037	0.508122	NO
P33981	Dual specificity protein kinase TTK	TTK	312810	276600	251340	233860	191230	331980	305720	322530	249670	222310	330867	321445	309711	243793	218821	1	0.884243	0.803491	0.74761	0.61133	1.05772	1.0276	0.990092	0.779363	0.699532	0.057724	0.143361	0.186601	0.031753	0.0882027	0.507642	YES
Q9H9C1	Spermatogenesis-defective protein 39 homolog	VIPAS39	131320	120730	93781	62686	63287	160690	124460	108310	76768	69537	160151	130862	104005	74960.8	68445.6	1	0.919357	0.714141	0.477353	0.48193	1.21955	0.996509	0.791998	0.570826	0.521212	0.219548	0.0771521	0.0778566	0.0934728	0.0392824	0.507312	NO
Q86WH2	Ras association domain-containing protein 3	RASSF3	23690	21163	16639	12140	10005	26995	21101	21429	14785	11717	26904.5	22186.3	20577.3	14437	11533.1	1	0.893331	0.702364	0.512453	0.42233	1.13569	0.936527	0.868606	0.609411	0.486834	0.135689	0.0431968	0.166243	0.0969588	0.0645037	0.506591	NO
Q9NZQ3	NCK-interacting protein with SH3 domain	NCKIPSD	32285	23606	17086	10937	8785.1	36311	24117	22533	15449	10889	36189.2	25357.5	21637.4	15085.3	10718.1	1	0.731175	0.529224	0.338764	0.272111	1.12093	0.785425	0.6702	0.467255	0.331984	0.12093	0.05425	0.140976	0.128491	0.0598727	0.504519	NO
Q5T440	Putative transferase CAF17, mitochondrial	IBA57	155210	153640	142420	129590	112880	216870	140710	148030	132090	138510	216143	147947	142146	128981	136336	1	0.989885	0.917596	0.834933	0.727273	1.39258	0.953208	0.915833	0.831007	0.878397	0.392582	-0.0366765	-0.00176266	-0.0039267	0.151124	0.501341	NO
P25791	Rhombotin-2	LMO2	38525	36882	24384	17389	19543	45516	38153	25408	25169	21646	45363.4	40115.4	24398.1	24576.5	21306.3	1	0.957352	0.63294	0.451369	0.507281	1.1775	1.04128	0.633307	0.637937	0.55305	0.177504	0.0839301	0.000366949	0.186567	0.045769	0.494138	NO
P22830	Ferrochelatase, mitochondrial	FECH	122700	111500	107540	98882	87917	141690	114350	123210	109160	104440	141215	120232	118313	106590	102801	1	0.90872	0.876447	0.805884	0.71652	1.15089	0.979883	0.964245	0.868707	0.837822	0.150895	0.0711623	0.0877988	0.0628225	0.121302	0.49398	NO
Q96FF7	Uncharacterized protein LOC113230		9387.5	9858	7992.1	8003.6	7436.4	12931	9094.7	8840.9	8147.9	8394.6	12887.6	9562.49	8489.51	7956.09	8262.84	1	1.05012	0.851356	0.852581	0.79216	1.37285	1.01864	0.904342	0.84752	0.880196	0.37285	-0.0314794	0.0529865	-0.00506051	0.0880363	0.477333	NO
P19105	Myosin regulatory light chain 12A;Myosin regulatory light chain 12B;Myosin regulatory light polypeptide 9	MYL12A;MYL12B;MYL9	538440	446530	369760	248320	283540	584630	453770	448260	317200	336170	582669	477110	430444	309733	330894	1	0.829303	0.686725	0.461184	0.526595	1.08214	0.886096	0.799427	0.575241	0.614541	0.0821434	0.0567932	0.112702	0.114057	0.0879459	0.453642	NO
Q9BT25	HAUS augmin-like complex subunit 8	HAUS8	39407	33371	23870	18039	19671	44535	32922	29629	22376	23234	44385.6	34615.3	28451.4	21849.3	22869.3	1	0.846829	0.60573	0.457761	0.499175	1.12634	0.878406	0.721988	0.554451	0.580337	0.126339	0.0315768	0.116258	0.0966899	0.0811614	0.452025	NO
Q96RG2	PAS domain-containing serine/threonine-protein kinase	PASK	40130	37830	32752	23857	17250	42991	37143	39760	28654	22219	42846.8	39053.5	38179.7	27979.5	21870.3	1	0.942686	0.816148	0.594493	0.429853	1.0677	0.973174	0.951401	0.697221	0.544985	0.0677005	0.0304873	0.135253	0.102728	0.115132	0.451301	YES
Q96F63	Coiled-coil domain-containing protein 97	CCDC97	62422	58823	52519	38186	26134	79984	54072	54768	52529	26177	79715.8	56853.2	52591.2	51292.4	25766.1	1	0.942344	0.841354	0.611739	0.418666	1.27705	0.910788	0.842511	0.821705	0.412773	0.277046	-0.0315562	0.00115661	0.209965	-0.00589322	0.450718	NO
P60903	Protein S100-A10	S100A10	69222	57583	59319	46689	51070	91431	58408	59796	59141	48127	91124.4	61412.2	57419.4	57748.8	47371.6	1	0.83186	0.856939	0.674482	0.737771	1.31641	0.887178	0.829496	0.834255	0.684343	0.316408	0.055318	-0.0274428	0.159773	-0.0534279	0.450628	NO
P52655	Transcription initiation factor IIA subunit 1;Transcription initiation factor IIA alpha chain;Transcription initiation factor IIA beta chain	GTF2A1	43507	33574	29921	26150	23052	63739	27323	32305	27533	25696	63525.2	28728.4	31021	26884.9	25292.7	1	0.771692	0.687728	0.601053	0.529846	1.46012	0.660316	0.713012	0.617943	0.581347	0.460115	-0.111376	0.0252835	0.0168906	0.0515017	0.442415	NO
Q13164	Mitogen-activated protein kinase 7	MAPK7	54691	48860	38143	32921	26866	65653	47822	53029	32561	27465	65432.8	50281.7	50921.3	31794.5	27033.9	1	0.893383	0.697427	0.601945	0.491233	1.19641	0.919379	0.931073	0.581348	0.494303	0.196409	0.0259957	0.233646	-0.0205976	0.00307029	0.438523	YES
Q15418	Ribosomal protein S6 kinase alpha-1	RPS6KA1	736830	571930	302980	152660	129060	685970	549570	516680	293150	172070	683669	577837	496144	286249	169369	1	0.776203	0.411194	0.207185	0.175156	0.927852	0.784221	0.673349	0.388487	0.229862	-0.0721476	0.00801707	0.262156	0.181302	0.0547063	0.434034	YES
Q5VSY0	G kinase-anchoring protein 1	GKAP1	7427	7286.1	7033.5	6348.6	6352.8	9875.7	7722.4	7522.1	6733.8	5820.2	9842.58	8119.6	7223.13	6575.28	5728.85	1	0.981029	0.947018	0.8548	0.855366	1.32524	1.09325	0.97255	0.885322	0.771354	0.325243	0.112226	0.0255322	0.0305215	-0.0840113	0.409511	NO
P29373	Cellular retinoic acid-binding protein 2	CRABP2	32268	27565	28954	25645	24282	40546	27889	30396	27395	26285	40410	29323.5	29187.9	26750.1	25872.4	1	0.854252	0.897298	0.79475	0.75251	1.25232	0.908748	0.904546	0.828998	0.801799	0.252325	0.0544959	0.00724818	0.0342478	0.0492884	0.397605	NO
Q8TBF2	Prostamide/prostaglandin F synthase	FAM213B	59884	61285	51259	41571	41240	63941	62174	62921	48216	43044	63726.6	65371.9	60420.1	47081	42368.4	1	1.0234	0.855972	0.694192	0.688665	1.06417	1.09164	1.00895	0.786203	0.707508	0.0641667	0.0682474	0.152982	0.0920108	0.018843	0.396249	NO
P28799	Granulins;Acrogranin;Paragranulin;Granulin-1;Granulin-2;Granulin-3;Granulin-4;Granulin-5;Granulin-6;Granulin-7	GRN	175850	158300	149110	144700	125090	209900	165700	166870	136090	148100	209196	174223	160238	132886	145775	1	0.900199	0.847939	0.82286	0.711345	1.18963	0.990747	0.911218	0.75568	0.828976	0.189628	0.0905477	0.063279	-0.0671801	0.117631	0.393906	NO
O43708	Maleylacetoacetate isomerase	GSTZ1	163000	152780	154020	134860	137420	167490	167160	171580	155820	148980	166928	175758	164760	152152	146642	1	0.937301	0.944908	0.827362	0.843067	1.0241	1.07827	1.0108	0.933447	0.899642	0.0240999	0.140969	0.065892	0.106085	0.0565746	0.393621	NO
P63167	Dynein light chain 1, cytoplasmic	DYNLL1	191540	161160	148530	99343	109050	240610	155660	152880	132720	106160	239803	163666	146804	129596	104494	1	0.841391	0.775452	0.518654	0.569333	1.25197	0.854476	0.766439	0.676599	0.545545	0.251974	0.0130855	-0.009013	0.157945	-0.0237875	0.390203	NO
Q6MZP7	Protein lin-54 homolog	LIN54	137980	119690	123860	100670	98640	148800	143390	125910	110160	107970	148301	150765	120906	107567	106275	1	0.867445	0.897666	0.729598	0.714886	1.0748	1.09266	0.876255	0.779582	0.770223	0.0748005	0.225216	-0.0214118	0.0499839	0.0553365	0.383925	NO
P42684	Abelson tyrosine-protein kinase 2	ABL2	84743	76764	66173	50568	51771	85048	78920	83533	61522	55174	84762.8	82979.3	80212.9	60073.7	54308	1	0.905845	0.780867	0.596722	0.610918	1.00023	0.979187	0.946543	0.708893	0.640855	0.000233332	0.0733425	0.165676	0.112171	0.0299376	0.381361	YES
Q7Z3C6	Autophagy-related protein 9A	ATG9A	27644	28405	27795	22273	21161	30185	29328	31010	25228	22717	30083.8	30836.5	29777.5	24634.1	22360.4	1	1.02753	1.00546	0.805708	0.765483	1.08826	1.11549	1.07718	0.89112	0.808871	0.0882567	0.0879573	0.0717147	0.0854117	0.0433888	0.376729	NO
P35580	Myosin-10	MYH10	4481000	3663600	2308000	1304100	1457200	4717800	3581300	3253300	1581900	1771800	4.70198e+06	3.7655e+06	3.12399e+06	1.54466e+06	1.74399e+06	1	0.817585	0.515064	0.291029	0.325195	1.04931	0.840327	0.697165	0.344714	0.389197	0.0493144	0.0227415	0.182101	0.0536847	0.0640014	0.371843	NO
Q9H5H4	Zinc finger protein 768	ZNF768	43478	38636	40125	31094	27860	48453	39977	47281	34624	28075	48290.5	42033.2	45401.8	33808.9	27634.3	1	0.888633	0.922881	0.715166	0.640784	1.11069	0.96677	1.04425	0.77761	0.635594	0.110688	0.0781366	0.121367	0.0624439	-0.00519015	0.367445	NO
Q8IWD4	Coiled-coil domain-containing protein 117	CCDC117	45010	42031	40678	37950	33233	54138	42967	47015	36630	35954	53956.4	45177	45146.3	35767.7	35389.7	1	0.933815	0.903755	0.843146	0.738347	1.19877	1.00371	1.00303	0.794661	0.786263	0.198766	0.0698959	0.0992746	-0.0484845	0.0479155	0.367367	NO
Q2TAZ0	Autophagy-related protein 2 homolog A	ATG2A	25170	21430	17454	13571	10693	29349	21794	22366	14994	9417.9	29250.6	22915	21477	14641	9270.08	1	0.85141	0.693445	0.539174	0.424831	1.16212	0.910408	0.853279	0.581686	0.368299	0.16212	0.0589979	0.159835	0.0425123	-0.0565324	0.366933	NO
Q7Z7E8	Ubiquitin-conjugating enzyme E2 Q1	UBE2Q1	192210	177340	179070	131570	120610	202310	189150	201510	154960	127940	201632	198879	193501	151312	125932	1	0.922637	0.931637	0.684512	0.627491	1.04902	1.0347	1.00672	0.787223	0.655179	0.0490168	0.11206	0.0750783	0.102711	0.0276879	0.366554	NO
P00519	Tyrosine-protein kinase ABL1	ABL1	463060	398910	380570	298240	265010	506970	407110	425890	341080	304420	505270	428050	408963	333051	299642	1	0.861465	0.821859	0.644063	0.572302	1.09115	0.924394	0.883174	0.719239	0.647091	0.091154	0.0629287	0.0613152	0.0751756	0.0747892	0.365363	YES
Q9Y4H4	G-protein-signaling modulator 3	GPSM3	42119	43094	42247	37563	35784	45994	43852	48553	43172	35945	45839.7	46107.5	46623.2	42155.7	35380.8	1	1.02315	1.00304	0.89183	0.849593	1.08834	1.0947	1.10694	1.00087	0.84002	0.088339	0.0715481	0.103901	0.109041	-0.00957246	0.363257	NO
O43353	Receptor-interacting serine/threonine-protein kinase 2	RIPK2	65962	62672	57621	46815	42134	76304	61595	65503	52696	44504	76048.1	64763.1	62899.5	51455.5	43805.5	1	0.950123	0.873548	0.709727	0.638762	1.15291	0.981825	0.953572	0.780078	0.664102	0.152908	0.0317023	0.0800237	0.0703513	0.02534	0.360325	YES
Q9H1K0	Rabenosyn-5	RBSN	118030	111190	89586	63371	50410	141910	110510	103580	71416	49051	141434	116194	99463.1	69734.8	48281.1	1	0.942049	0.75901	0.536906	0.427095	1.19829	0.984445	0.842694	0.590823	0.409058	0.198289	0.0423968	0.0836831	0.0539171	-0.0180369	0.360249	NO
Q96JK9	Mastermind-like protein 3	MAML3	17936	16549	17079	14969	14334	18032	17700	18004	17794	16327	17971.5	18610.4	17288.4	17375.1	16070.7	1	0.922669	0.952219	0.834579	0.799175	1.00198	1.0376	0.963895	0.968729	0.896004	0.0019807	0.114931	0.0116757	0.13415	0.0968296	0.359567	NO
Q10713	Mitochondrial-processing peptidase subunit alpha	PMPCA	501340	434570	399730	310230	292930	525600	434280	445160	371020	353770	523837	456617	427467	362286	348217	1	0.866817	0.797323	0.618802	0.584294	1.04487	0.910794	0.852648	0.722635	0.694573	0.0448743	0.0439767	0.0553252	0.103834	0.110279	0.358289	NO
Q8IVV7	Glucose-induced degradation protein 4 homolog	GID4	28823	23969	23554	20407	15758	42095	22812	25843	18907	13743	41953.8	23985.3	24815.8	18461.9	13527.3	1	0.831593	0.817195	0.708011	0.546716	1.45557	0.83216	0.860974	0.640527	0.469323	0.455568	0.000566866	0.0437792	-0.0674836	-0.0773933	0.355037	NO
Q92597	Protein NDRG1	NDRG1	147620	120620	119200	102840	97026	170670	128660	125950	116400	101310	170098	135278	120944	113660	99719.9	1	0.817098	0.807479	0.696654	0.657269	1.15227	0.916391	0.819293	0.769949	0.675517	0.152267	0.0992931	0.0118142	0.0732955	0.0182487	0.354918	NO
P09110	3-ketoacyl-CoA thiolase, peroxisomal	ACAA1	13909	11945	10988	8981	9070	15178	11985	12290	10051	10620	15127.1	12601.5	11801.5	9814.39	10453.3	1	0.858796	0.789992	0.645697	0.652096	1.08758	0.905993	0.848481	0.705615	0.75155	0.0875762	0.0471961	0.058489	0.0599176	0.0994544	0.352633	NO
Q99956	Dual specificity protein phosphatase 9	DUSP9	34754	27326	24582	14466	13568	42062	26080	27495	17352	14440	41920.9	27421.4	26402.2	16943.5	14213.4	1	0.786269	0.707314	0.41624	0.390401	1.20622	0.789015	0.759688	0.487527	0.40897	0.206219	0.00274584	0.0523735	0.0712875	0.0185692	0.351195	NO
Q8IZ07	Ankyrin repeat domain-containing protein 13A	ANKRD13A	148610	139760	117510	99321	84222	184070	130950	124760	106080	98407	183453	137685	119801	103583	96862.4	1	0.940448	0.790727	0.668333	0.566732	1.23446	0.926488	0.806146	0.697011	0.651789	0.234457	-0.0139598	0.0154182	0.0286779	0.0850577	0.349651	NO
P42167	Lamina-associated polypeptide 2, isoforms beta/gamma;Thymopoietin;Thymopentin	TMPO	91211	78639	80914	70794	77822	105440	80454	88375	84572	75241	105086	84592.2	84862.5	82581.1	74060	1	0.862166	0.887108	0.776156	0.853208	1.15212	0.927434	0.930397	0.905386	0.811964	0.152124	0.065268	0.0432893	0.129229	-0.0412446	0.348666	NO
P68133	Actin, alpha skeletal muscle;Actin, alpha cardiac muscle 1;Actin, gamma-enteric smooth muscle;Actin, aortic smooth muscle	ACTA1;ACTC1;ACTG2;ACTA2	864880	726210	744620	520030	517220	954550	681500	814440	654420	593070	951349	716553	782069	639015	583761	1	0.839666	0.860952	0.601274	0.598025	1.09998	0.8285	0.904252	0.738848	0.674962	0.0999777	-0.0111656	0.0433001	0.137574	0.0769371	0.346623	NO
Q96BM9	ADP-ribosylation factor-like protein 8A	ARL8A	46554	38784	38899	32203	26431	53934	38324	44463	34025	29203	53753.1	40295.2	42695.8	33224	28744.6	1	0.833097	0.835567	0.691734	0.567749	1.15464	0.865558	0.917124	0.713667	0.617447	0.15464	0.0324612	0.0815565	0.0219323	0.0496979	0.340288	NO
P50135	Histamine N-methyltransferase	HNMT	8770.7	7846.4	8159.5	6750.7	6526.3	9745.1	7907.4	8355.2	7676.5	7585.2	9712.42	8314.12	8023.12	7495.79	7466.14	1	0.894615	0.930313	0.769688	0.744103	1.10737	0.947942	0.914763	0.85464	0.85126	0.107371	0.0533274	-0.01555	0.0849523	0.107157	0.337258	NO
Q02833	Ras association domain-containing protein 7	RASSF7	13518	11880	10046	10276	7638.1	15583	11179	11986	10324	9182.3	15530.7	11754	11509.6	10081	9038.18	1	0.878828	0.743157	0.760172	0.565032	1.14889	0.869507	0.851428	0.745744	0.668603	0.148893	-0.00932138	0.108271	-0.0144276	0.103571	0.336987	NO
Q7Z401	C-myc promoter-binding protein	DENND4A	16581	14116	11851	8815	7679.8	20014	13745	14477	9510.8	7138.6	19946.9	14452	13901.6	9286.91	7026.55	1	0.851336	0.714734	0.531633	0.463169	1.203	0.871599	0.838405	0.560094	0.423771	0.202996	0.0202627	0.123672	0.028461	-0.0393972	0.335994	NO
Q8TDP1	Ribonuclease H2 subunit C	RNASEH2C	35034	29240	27407	23955	20955	43107	30052	30705	23718	21445	42962.4	31597.7	29484.6	23159.7	21108.4	1	0.834618	0.782297	0.683764	0.598133	1.22631	0.901916	0.8416	0.661063	0.602512	0.226307	0.0672983	0.0593025	-0.0227018	0.00437876	0.334585	NO
P46736	Lys-63-specific deubiquitinase BRCC36	BRCC3	70773	61844	63116	49320	43302	74668	65959	74263	49162	49626	74417.6	69351.6	71311.4	48004.7	48847.1	1	0.873836	0.891809	0.696876	0.611843	1.0515	0.979916	1.00761	0.678291	0.690194	0.0514968	0.10608	0.115798	-0.0185847	0.0783503	0.33314	NO
Q8N5M1	ATP synthase mitochondrial F1 complex assembly factor 2	ATPAF2	30171	29887	27630	21896	21224	33193	31996	30163	24010	22033	33081.7	33641.7	28964.1	23444.8	21687.2	1	0.990587	0.91578	0.72573	0.703457	1.09647	1.11503	0.96	0.777064	0.718809	0.0964728	0.124448	0.0442195	0.0513338	0.0153517	0.331826	NO
Q9HB21	Pleckstrin homology domain-containing family A member 1	PLEKHA1	4265.9	3500.6	3574.5	2381.6	2414.7	5281.4	3760.7	3638.2	3020.3	1920.4	5263.69	3954.13	3493.6	2949.2	1890.26	1	0.820601	0.837924	0.558288	0.566047	1.2339	0.926916	0.818959	0.691343	0.443109	0.233899	0.106316	-0.0189652	0.133055	-0.122938	0.331366	NO
Q9Y2E5	Epididymis-specific alpha-mannosidase	MAN2B2	57217	58470	48604	49554	47311	77390	54234	49925	51679	47850	77130.5	57023.5	47940.7	50462.5	47099	1	1.0219	0.849468	0.866071	0.82687	1.34803	0.996619	0.837875	0.881949	0.823164	0.348034	-0.0252803	-0.0115929	0.0158773	-0.00370589	0.323332	NO
O75351	Vacuolar protein sorting-associated protein 4B	VPS4B	112410	96577	83980	58546	44880	113410	98502	104200	64532	53482	113030	103568	100058	63012.9	52642.6	1	0.85915	0.747087	0.520826	0.399253	1.00551	0.921346	0.890121	0.560563	0.468309	0.00551246	0.0621961	0.143034	0.0397374	0.0690558	0.319536	NO
Q96DC7	Transmembrane and coiled-coil domain-containing protein 6	TMCO6	58115	56965	51528	33839	30546	60966	57631	58135	42995	30754	60761.5	60595.3	55824.4	41982.9	30271.3	1	0.980212	0.886656	0.582277	0.525613	1.04554	1.04268	0.960585	0.72241	0.520886	0.0455397	0.0624668	0.0739288	0.140134	-0.00472694	0.317342	NO
O15488	Glycogenin-2	GYG2	34712	31634	31484	24017	20500	34520	33047	35214	26651	24732	34404.2	34746.8	33814.4	26023.6	24343.8	1	0.911327	0.907006	0.691893	0.590574	0.991134	1.001	0.974141	0.749701	0.701308	-0.00886639	0.0896744	0.067135	0.0578077	0.110734	0.316485	NO
P11234	Ras-related protein Ral-B	RALB	34438	27209	29306	23241	22056	39325	28878	32348	23797	23596	39193.1	30363.3	31062.3	23236.8	23225.6	1	0.790087	0.850979	0.674865	0.640455	1.13808	0.881681	0.901977	0.674743	0.674419	0.138078	0.0915949	0.0509989	-0.000121753	0.0339638	0.314513	NO
Q6AI08	HEAT repeat-containing protein 6	HEATR6	93859	87417	82388	70018	68430	101580	87398	94309	84133	66823	101239	91893.3	90560.6	82152.5	65774.2	1	0.931365	0.877785	0.745991	0.729072	1.07863	0.979057	0.964858	0.875275	0.700776	0.0786321	0.0476921	0.0870732	0.129284	-0.028296	0.314385	NO
P09871	Complement C1s subcomponent;Complement C1s subcomponent heavy chain;Complement C1s subcomponent light chain;Mannan-binding lectin serine protease 1;Mannan-binding lectin serine protease 1 heavy chain;Mannan-binding lectin serine protease 1 light chain	C1S;MASP1	7402.4	6670.1	6191.4	5680.2	4845.5	8524.8	7337	6883.2	5887.5	4592.5	8496.21	7714.38	6609.62	5748.91	4520.42	1	0.901073	0.836404	0.767346	0.654585	1.14776	1.04215	0.892902	0.776627	0.610669	0.147764	0.141073	0.0564981	0.0092815	-0.0439158	0.310701	NO
Q00534	Cyclin-dependent kinase 6	CDK6	464070	388820	343430	260470	232620	478800	412250	407630	291300	250960	477194	433454	391428	284443	247021	1	0.837848	0.740039	0.561273	0.501261	1.02828	0.934028	0.843468	0.61293	0.532293	0.0282807	0.0961798	0.103429	0.0516574	0.031032	0.310579	YES
Q9UIQ6	Leucyl-cystinyl aminopeptidase;Leucyl-cystinyl aminopeptidase, pregnancy serum form	LNPEP	22800	19792	16657	13120	13717	26325	19410	19483	14951	13361	26236.7	20408.4	18708.6	14599	13151.3	1	0.86807	0.73057	0.575439	0.601623	1.15073	0.895103	0.820554	0.640309	0.576811	0.150733	0.0270332	0.0899838	0.0648704	-0.0248119	0.307809	NO
Q9H3Y8	Pancreatic progenitor cell differentiation and proliferation factor	PPDPF	4517.2	4222	4472.8	4320.6	3922.8	5661.4	4654.7	4902.5	3920.3	3831.8	5642.41	4894.12	4707.65	3828.01	3771.66	1	0.93465	0.990171	0.956477	0.868414	1.2491	1.08344	1.04216	0.847431	0.834955	0.249095	0.14879	0.0519892	-0.109047	-0.0334594	0.307369	NO
Q14689	Disco-interacting protein 2 homolog A	DIP2A	18547	16908	17358	15206	14469	21519	18122	18434	16320	14263	21446.8	19054.1	17701.3	15935.8	14039.1	1	0.91163	0.935893	0.819863	0.780126	1.15635	1.02734	0.954404	0.859213	0.756949	0.15635	0.115712	0.0185111	0.0393497	-0.0231772	0.306746	NO
P30047	GTP cyclohydrolase 1 feedback regulatory protein	GCHFR	49614	45036	46915	35463	38981	53923	46620	47002	42389	42611	53742.2	49017.9	45133.9	41391.1	41942.2	1	0.907728	0.9456	0.714778	0.785685	1.08321	0.987985	0.9097	0.834263	0.84537	0.0832055	0.0802577	-0.0358999	0.119485	0.0596846	0.306733	NO
Q9NYP3	Protein downstream neighbor of Son	DONSON	65894	64606	56043	48128	46397	78784	68771	62227	51911	40630	78519.8	72308.2	59753.7	50689	39992.3	1	0.980453	0.850502	0.730385	0.704116	1.19161	1.09734	0.906816	0.76925	0.606918	0.191607	0.116888	0.0563137	0.0388653	-0.0971973	0.306478	NO
Q9H1E3	Nuclear ubiquitous casein and cyclin-dependent kinase substrate 1	NUCKS1	237010	213120	211930	165910	171050	254710	214860	223740	189980	194540	253856	225911	214847	185508	191487	1	0.899203	0.894182	0.700013	0.7217	1.07108	0.953172	0.90649	0.7827	0.807926	0.0710762	0.0539697	0.0123086	0.0826876	0.0862266	0.306269	NO
P43250	G protein-coupled receptor kinase 6	GRK6	48684	37243	31785	26338	22244	61062	42903	36848	23954	16682	60857.2	45109.7	35383.4	23390.1	16420.2	1	0.764995	0.652884	0.540999	0.456906	1.25005	0.926582	0.726798	0.480448	0.337281	0.250046	0.161587	0.0739143	-0.0605515	-0.119625	0.30537	YES
Q8IV63	Inactive serine/threonine-protein kinase VRK3	VRK3	28530	26859	23697	19144	14034	37947	24386	23891	18807	16468	37819.7	25640.3	22941.4	18364.3	16209.5	1	0.94143	0.830599	0.671013	0.491903	1.32561	0.898714	0.804116	0.643683	0.568157	0.325613	-0.0427165	-0.0264833	-0.02733	0.0762539	0.305337	YES
O95297	Myelin protein zero-like protein 1	MPZL1	14941	10096	9620.8	7076	4720.5	16343	9974.2	11082	7997.2	5875.2	16288.2	10487.2	10641.5	7808.94	5782.98	1	0.675725	0.643919	0.473596	0.315943	1.09017	0.701909	0.712237	0.522652	0.387055	0.0901673	0.0261846	0.0683178	0.0490558	0.071112	0.304838	NO
P60709	Actin, cytoplasmic 1;Actin, cytoplasmic 1, N-terminally processed	ACTB	5726800	5191100	4960200	3868300	3848600	6478100	4940300	5173500	4616200	4274400	6.45637e+06	5.19441e+06	4.96787e+06	4.50753e+06	4.20731e+06	1	0.906457	0.866138	0.675473	0.672033	1.1274	0.907034	0.867478	0.787094	0.73467	0.127397	0.000577129	0.00134014	0.111621	0.0626371	0.303572	NO
O94868	F-BAR and double SH3 domains protein 2	FCHSD2	11198	10379	9551.4	8118.7	7597.3	12412	11204	11671	8157.1	7024.4	12370.4	11780.3	11207.1	7965.08	6914.15	1	0.926862	0.852956	0.725013	0.678452	1.10469	1.052	1.00081	0.711295	0.617445	0.104695	0.125137	0.147859	-0.0137187	-0.0610067	0.302965	NO
O43683	Mitotic checkpoint serine/threonine-protein kinase BUB1	BUB1	148580	129180	123120	108550	82221	183520	126710	134560	110200	84825	182905	133227	129212	107606	83493.6	1	0.869431	0.828645	0.730583	0.553379	1.23102	0.896671	0.869645	0.724228	0.561944	0.231017	0.0272402	0.0410001	-0.00635457	0.00856516	0.301468	YES
Q66K89	Transcription factor E4F1	E4F1	10552	8926.4	8980.7	8634	6730.4	10799	10060	8691.5	8479.3	9182	10762.8	10577.4	8346.05	8279.69	9037.88	1	0.845944	0.85109	0.818234	0.637832	1.01998	1.00241	0.790945	0.784656	0.856509	0.0199757	0.156467	-0.0601451	-0.0335772	0.218677	0.301397	NO
Q7Z6V5	tRNA-specific adenosine deaminase 2	ADAT2	100170	93756	87339	82377	73428	128040	93138	93108	83331	72031	127611	97928.6	89407.3	81369.3	70900.4	1	0.935969	0.871908	0.822372	0.733034	1.27394	0.977624	0.892556	0.812313	0.707801	0.27394	0.0416549	0.0206483	-0.0100594	-0.0252329	0.300951	NO
Q6P3S6	F-box only protein 42	FBXO42	7229.2	7476.5	7177.2	5741.4	5456.3	8897.4	8084	7127.7	6027.5	5229.2	8867.56	8499.8	6844.4	5885.61	5147.12	1	1.03421	0.992807	0.794196	0.754758	1.22663	1.17576	0.946772	0.814144	0.711991	0.226631	0.141551	-0.0460351	0.0199482	-0.0427677	0.299328	NO
Q9UHA4	Ragulator complex protein LAMTOR3	LAMTOR3	50712	49483	47370	40778	39072	58691	45559	51169	43366	45372	58494.2	47902.3	49135.2	42345.1	44659.9	1	0.975765	0.934098	0.804109	0.770469	1.15346	0.944596	0.968908	0.835012	0.880657	0.153458	-0.0311695	0.0348092	0.0309028	0.110188	0.298189	NO
P51817	cAMP-dependent protein kinase catalytic subunit PRKX;Putative serine/threonine-protein kinase PRKY	PRKX;PRKY	68410	54528	56765	45388	34479	81383	55056	56846	47086	40967	81110.1	57887.8	54586.6	45977.6	40324	1	0.797076	0.829776	0.66347	0.504005	1.18565	0.846189	0.797933	0.672088	0.589446	0.185646	0.0491129	-0.0318432	0.00861822	0.0854406	0.296975	YES
P00374	Dihydrofolate reductase	DHFR	221790	174310	126110	69746	47618	240270	172660	156040	87289	49602	239464	181541	149838	85234.2	48823.5	1	0.785924	0.568601	0.314469	0.214699	1.07969	0.818526	0.675585	0.384301	0.220134	0.0796889	0.032602	0.106984	0.0698326	0.00543515	0.294543	NO
O43504	Ragulator complex protein LAMTOR5	LAMTOR5	72660	63675	66560	52645	56276	77004	62312	72717	64044	59363	76745.8	65517	69826.8	62536.4	58431.3	1	0.876342	0.916047	0.724539	0.774511	1.05623	0.901693	0.961007	0.860671	0.804174	0.0562311	0.0253513	0.0449601	0.136132	0.0296622	0.292337	NO
Q9Y3E1	Hepatoma-derived growth factor-related protein 3	HDGFRP3	58724	54145	57289	50498	48620	63366	54502	63665	53784	53165	63153.5	57305.3	61134.6	52517.9	52330.5	1	0.922025	0.975564	0.859921	0.827941	1.07543	0.975842	1.04105	0.894317	0.891127	0.0754289	0.0538165	0.0654856	0.0343965	0.063186	0.292314	NO
Q9H3H1	tRNA dimethylallyltransferase, mitochondrial	TRIT1	80151	66590	47181	35218	28087	95032	58221	54788	40506	32976	94713.3	61215.6	52610.4	39552.5	32458.4	1	0.830807	0.588651	0.439396	0.350426	1.18169	0.763753	0.656391	0.493474	0.404966	0.181686	-0.0670534	0.0677397	0.0540788	0.0545398	0.290991	NO
Q03252	Lamin-B2	LMNB2	201520	184750	186220	149730	125300	214530	207510	196200	157170	134150	213811	218183	188402	153470	132044	1	0.916782	0.924077	0.743003	0.621775	1.06099	1.08269	0.934904	0.761563	0.655242	0.0609891	0.165906	0.010827	0.0185597	0.0334677	0.289749	NO
Q07021	Complement component 1 Q subcomponent-binding protein, mitochondrial	C1QBP	324010	274920	291220	219090	235070	339580	277720	330470	255360	244770	338441	292005	317335	249349	240928	1	0.848492	0.898799	0.676183	0.725502	1.04454	0.901221	0.979399	0.769571	0.743582	0.0445392	0.0527285	0.0805999	0.0933882	0.0180802	0.289336	NO
Q9H9Q4	Non-homologous end-joining factor 1	NHEJ1	42775	38737	37846	32807	33799	49257	36812	37678	38086	37726	49091.8	38705.4	36180.5	37189.4	37133.9	1	0.905599	0.884769	0.766967	0.790158	1.14768	0.904861	0.845832	0.86942	0.868121	0.147675	-0.000738025	-0.0389374	0.102453	0.0779629	0.288416	NO
Q14657	EKC/KEOPS complex subunit LAGE3	LAGE3	89130	78279	82212	66088	65587	104140	72949	86105	76888	69833	103791	76701.1	82682.7	75078	68736.9	1	0.878256	0.922383	0.741479	0.735858	1.16449	0.860554	0.927664	0.842343	0.771198	0.164487	-0.0177029	0.00528084	0.100864	0.0353408	0.28827	NO
Q15544	Transcription initiation factor TFIID subunit 11	TAF11	10335	9041.5	9678	7927.4	7528.8	11409	9261.4	10955	8866.3	7313	11370.7	9737.76	10519.6	8657.58	7198.22	1	0.874843	0.93643	0.767044	0.728476	1.10022	0.942212	1.01786	0.837695	0.696489	0.100216	0.0673693	0.0814305	0.0706515	-0.0319867	0.287681	NO
Q9Y680	Peptidyl-prolyl cis-trans isomerase FKBP7	FKBP7	118800	114450	114410	90773	96724	124660	112550	126050	106840	102990	124242	118339	121040	104325	101373	1	0.963384	0.963047	0.764082	0.814175	1.04581	0.99612	1.01886	0.878156	0.853312	0.0458075	0.0327359	0.0558084	0.114074	0.0391372	0.287562	NO
O75264	Small integral membrane protein 24	SMIM24	6775.9	6563	6870.1	4711.5	5061.9	8898.7	5837.1	6376	5961.4	5059.3	8868.86	6137.33	6122.58	5821.07	4979.89	1	0.96858	1.0139	0.695332	0.747045	1.30888	0.905759	0.903582	0.859084	0.734942	0.308882	-0.0628209	-0.11032	0.163752	-0.0121031	0.28739	NO
Q9NRF9	DNA polymerase epsilon subunit 3	POLE3	263090	221110	221000	184100	188070	271290	216160	250550	227820	195280	270380	227278	240592	222457	192215	1	0.840435	0.840017	0.699761	0.71485	1.02771	0.86388	0.914484	0.845555	0.730605	0.0277098	0.0234453	0.0744676	0.145794	0.0157548	0.287172	NO
P61006	Ras-related protein Rab-8A	RAB8A	177940	162730	155550	122640	119950	191210	156610	168030	147050	131740	190569	164665	161352	143588	129672	1	0.914522	0.874171	0.689221	0.674104	1.07097	0.925398	0.906775	0.806948	0.728741	0.0709719	0.0108759	0.0326037	0.117727	0.0546378	0.286816	NO
Q9BSH5	Haloacid dehalogenase-like hydrolase domain-containing protein 3	HDHD3	48746	43372	45878	40932	40503	65957	42671	47161	40126	38939	65735.8	44865.8	45286.5	39181.4	38327.8	1	0.889755	0.941164	0.8397	0.830899	1.34854	0.920399	0.929031	0.803787	0.786276	0.348537	0.0306444	-0.0121334	-0.0359124	-0.0446226	0.286513	NO
Q9NUW8	Tyrosyl-DNA phosphodiesterase 1	TDP1	192080	164410	151250	111220	88401	214210	156660	166610	130220	98444	213492	164718	159988	127155	96898.9	1	0.855945	0.787432	0.57903	0.46023	1.11147	0.857548	0.832923	0.661987	0.504471	0.111472	0.00160262	0.0454911	0.0829579	0.0442412	0.285765	NO
O75143	Autophagy-related protein 13	ATG13	19974	21150	18681	14312	13441	24525	20138	18024	15147	15785	24442.8	21173.8	17307.6	14790.4	15537.2	1	1.05888	0.935266	0.716531	0.672925	1.22373	1.06007	0.866507	0.740484	0.777873	0.223728	0.00119161	-0.0687584	0.0239528	0.104949	0.285063	NO
Q14289	Protein-tyrosine kinase 2-beta	PTK2B	650990	569070	524790	384530	323800	675550	572560	577340	459250	366300	673284	602010	554393	448439	360551	1	0.874161	0.806141	0.590685	0.497396	1.03425	0.92476	0.851615	0.688857	0.55385	0.0342469	0.0505994	0.045474	0.0981721	0.0564535	0.284946	YES
P45984	Mitogen-activated protein kinase 9	MAPK9	248780	215970	190680	116760	74622	258520	214410	202490	155730	88415	257653	225438	194442	152064	87027.3	1	0.868116	0.76646	0.46933	0.299952	1.03567	0.906175	0.781582	0.611239	0.349816	0.035666	0.0380586	0.0151212	0.141909	0.0498644	0.280619	YES
Q8WY54	Protein phosphatase 1E	PPM1E	143180	135150	118380	97039	91692	154500	132090	132190	112230	97703	153982	138884	126936	109588	96169.5	1	0.943917	0.826791	0.677741	0.640397	1.07544	0.969996	0.886548	0.765387	0.671668	0.0754425	0.0260795	0.0597569	0.0876453	0.0312717	0.280196	NO
P29966	Myristoylated alanine-rich C-kinase substrate	MARCKS	322000	275590	281960	215460	221270	350650	265980	305740	251350	242000	349474	279661	293588	245433	238202	1	0.85587	0.875652	0.66913	0.687174	1.08532	0.868512	0.911764	0.762215	0.739757	0.085323	0.012642	0.0361121	0.0930842	0.0525827	0.279744	NO
P43487	Ran-specific GTPase-activating protein	RANBP1	2000800	1709100	1761400	1339700	1451600	2373000	1708700	1767900	1582900	1438200	2.36504e+06	1.79659e+06	1.69763e+06	1.54564e+06	1.41563e+06	1	0.854208	0.880348	0.669582	0.72551	1.18205	0.897934	0.848477	0.77251	0.70753	0.182048	0.0437261	-0.0318706	0.102928	-0.0179796	0.278852	NO
Q6PCT2	F-box/LRR-repeat protein 19	FBXL19	13190	11510	9277	8451.8	6463.5	14026	10875	11632	9548.6	6769.3	13979	11434.4	11169.7	9323.82	6663.05	1	0.872631	0.703336	0.640773	0.49003	1.05982	0.866896	0.846829	0.706886	0.505159	0.0598151	-0.00573485	0.143493	0.0661123	0.015129	0.278815	NO
Q02750	Dual specificity mitogen-activated protein kinase kinase 1	MAP2K1	361560	326450	304730	218810	196500	339150	329200	319740	257040	270840	338013	346132	307032	250989	266589	1	0.902893	0.84282	0.605183	0.543478	0.934873	0.957331	0.849186	0.694184	0.73733	-0.0651273	0.0544376	0.00636589	0.0890009	0.193852	0.278529	YES
Q7Z7C8	Transcription initiation factor TFIID subunit 8	TAF8	58506	55193	52390	47814	45128	63312	56812	57355	50636	48705	63099.7	59734.1	55075.4	49444	47940.5	1	0.943373	0.895464	0.81725	0.77134	1.07852	1.02099	0.941363	0.84511	0.819412	0.0785162	0.0776183	0.0458991	0.0278605	0.0480727	0.277967	NO
Q9Y2G2	Caspase recruitment domain-containing protein 8	CARD8	50690	44065	41861	35259	34305	55574	42398	50260	38133	35356	55387.6	44578.7	48262.4	37235.3	34801.1	1	0.869304	0.825824	0.695581	0.676761	1.09267	0.879439	0.952108	0.73457	0.686547	0.0926735	0.0101351	0.126285	0.0389886	0.0097862	0.277868	NO
O75528	Transcriptional adapter 3	TADA3	8003.9	6588.7	5864	4054.6	3534.2	9084.5	6854.7	6435.4	4810.2	3181.1	9054.03	7207.27	6179.62	4696.97	3131.17	1	0.823186	0.732643	0.506578	0.44156	1.1312	0.90047	0.772076	0.586835	0.391206	0.131203	0.0772839	0.0394332	0.0802566	-0.0503542	0.277822	NO
Q32NC0	UPF0711 protein C18orf21	C18orf21	16448	14696	13958	10956	10269	18971	14139	14458	12429	11280	18907.4	14866.2	13883.4	12136.4	11103	1	0.893482	0.848614	0.666099	0.624331	1.14952	0.903833	0.844076	0.737866	0.675034	0.149524	0.0103503	-0.0045383	0.0717665	0.0507024	0.277805	NO
Q9UKE5	TRAF2 and NCK-interacting protein kinase	TNIK	420240	357680	274900	203870	185180	382950	366760	341560	250170	222400	381666	385624	327984	244281	218909	1	0.851133	0.65415	0.485128	0.440653	0.908209	0.917629	0.780469	0.581289	0.520915	-0.0917911	0.0664962	0.126319	0.0961614	0.0802619	0.277448	YES
Q9BRQ3	Nucleoside diphosphate-linked moiety X motif 22	NUDT22	18081	15497	15227	14172	13065	20972	16572	16101	14276	13543	20901.7	17424.4	15461.1	13939.9	13330.4	1	0.857088	0.842155	0.783806	0.722582	1.156	0.963685	0.855099	0.770972	0.737262	0.156002	0.106597	0.0129446	-0.0128347	0.0146802	0.277389	NO
P50548	ETS domain-containing transcription factor ERF	ERF	19718	16967	17067	14304	11696	23572	15907	17420	15535	13286	23492.9	16725.2	16727.6	15169.3	13077.5	1	0.860483	0.865554	0.725429	0.593164	1.19145	0.848219	0.848343	0.769312	0.663225	0.191447	-0.012264	-0.0172113	0.0438837	0.0700612	0.275916	NO
Q9NZM4	Glioma tumor suppressor candidate region gene 1 protein	GLTSCR1	29884	27536	27728	21779	19413	31041	27108	28893	25348	22938	30936.9	28502.3	27744.6	24751.3	22578	1	0.92143	0.927854	0.728785	0.649612	1.03523	0.953765	0.928411	0.828246	0.75552	0.0352328	0.0323352	0.000556229	0.0994611	0.105909	0.273494	NO
Q9BSW2	EF-hand calcium-binding domain-containing protein 4B	CRACR2A	10284	10189	9141.3	8840.6	6570.5	12580	10306	9791.4	8498.1	6866.8	12537.8	10836.1	9402.23	8298.05	6759.02	1	0.990762	0.888886	0.859646	0.638905	1.21916	1.05368	0.914258	0.806889	0.657237	0.219157	0.0629221	0.0253726	-0.0527567	0.0183315	0.273026	NO
Q6V1X1	Dipeptidyl peptidase 8	DPP8	26996	22985	24236	20423	18783	31240	22184	25541	23111	19546	31135.2	23325	24525.9	22567	19239.2	1	0.851422	0.897763	0.756519	0.69577	1.15333	0.864018	0.908499	0.835937	0.712669	0.153328	0.0125958	0.0107368	0.0794175	0.0168992	0.272977	NO
Q9BQ70	Transcription factor 25	TCF25	18853	15796	16005	12101	12347	21451	17054	17151	13280	11680	21379.1	17931.2	16469.3	12967.4	11496.7	1	0.837851	0.848937	0.641861	0.654909	1.13399	0.951105	0.873565	0.687815	0.609806	0.133987	0.113254	0.0246284	0.0459546	-0.045103	0.272721	NO
Q8IX04	Ubiquitin-conjugating enzyme E2 variant 3	UEVLD	86425	79452	76039	62671	59103	93965	81412	81883	70577	61428	93649.9	85599.4	78628.5	68915.6	60463.8	1	0.919317	0.879826	0.725149	0.683865	1.0836	0.990448	0.909789	0.797403	0.699611	0.083597	0.0711303	0.0299623	0.0722544	0.0157459	0.27269	NO
O00512	B-cell CLL/lymphoma 9 protein	BCL9	22518	21357	20147	17015	18091	26091	21165	20958	18657	18945	26003.5	22253.6	20125	18217.8	18647.6	1	0.948441	0.894706	0.755618	0.803402	1.15479	0.988259	0.89373	0.809033	0.828122	0.154787	0.0398181	-0.000976735	0.0534153	0.02472	0.271764	NO
Q16762	Thiosulfate sulfurtransferase	TST	117870	112970	118540	105100	92929	131910	116670	127630	108770	97813	131468	122671	122557	106210	96277.8	1	0.958429	1.00568	0.89166	0.788402	1.11536	1.04073	1.03977	0.901073	0.816813	0.115361	0.082302	0.0340819	0.00941292	0.0284106	0.269569	NO
O43715	TP53-regulated inhibitor of apoptosis 1	TRIAP1	98816	83161	90326	78503	73095	102270	85073	99501	82462	84401	101927	89448.7	95546.2	80520.8	83076.3	1	0.841574	0.914083	0.794436	0.739708	1.03148	0.905205	0.966911	0.814856	0.840717	0.0314829	0.0636308	0.0528279	0.0204198	0.101009	0.26937	NO
Q9NTM9	Copper homeostasis protein cutC homolog	CUTC	133360	112450	114470	89277	93978	144430	108130	122110	111180	97474	143946	113692	117257	108563	95944.1	1	0.843206	0.858353	0.669444	0.704694	1.07938	0.852517	0.879249	0.814058	0.719437	0.0793763	0.00931076	0.0208956	0.144614	0.0147426	0.26894	NO
Q8N371	Lysine-specific demethylase 8	KDM8	64683	61832	61261	55752	51087	78074	63607	59997	56460	55387	77812.2	66878.6	57612.4	55130.9	54517.7	1	0.955924	0.947096	0.861927	0.789806	1.20298	1.03394	0.890688	0.852324	0.842844	0.202977	0.0780211	-0.0564079	-0.00960215	0.0530381	0.268026	NO
Q9NYV4	Cyclin-dependent kinase 12	CDK12	554270	466960	445200	306740	249040	548640	440300	484740	374130	335110	546800	462947	465474	365323	329850	1	0.842477	0.803219	0.553413	0.449312	0.986523	0.835237	0.839796	0.659106	0.595107	-0.0134772	-0.00724034	0.0365771	0.105694	0.145796	0.267349	YES
Q9BU89	Deoxyhypusine hydroxylase	DOHH	122900	110110	104990	88743	86787	139570	109770	116480	97144	86460	139102	115416	111850	94857.2	85102.9	1	0.895932	0.854272	0.722075	0.706159	1.13183	0.939105	0.910093	0.771824	0.692457	0.13183	0.0431736	0.055821	0.0497493	-0.0137026	0.266871	NO
P62834	Ras-related protein Rap-1A	RAP1A	36916	32423	33479	25550	28346	39195	32869	35176	30575	29723	39063.6	34559.6	33777.9	29855.2	29256.5	1	0.878291	0.906897	0.692112	0.767851	1.05817	0.936169	0.914993	0.808735	0.792515	0.058174	0.0578779	0.00809673	0.116623	0.0246635	0.265435	NO
P53634	Dipeptidyl peptidase 1;Dipeptidyl peptidase 1 exclusion domain chain;Dipeptidyl peptidase 1 heavy chain;Dipeptidyl peptidase 1 light chain	CTSC	566600	512730	531770	404380	442020	596680	511020	542740	477600	495460	594679	537304	521168	466357	487683	1	0.904924	0.938528	0.713696	0.780127	1.04956	0.948296	0.919817	0.82308	0.860719	0.0495568	0.0433717	-0.018711	0.109384	0.080592	0.264194	NO
P54920	Alpha-soluble NSF attachment protein	NAPA	213410	193750	181260	138320	112680	241740	190060	191150	159270	117580	240929	199836	183553	155521	115734	1	0.907877	0.849351	0.648142	0.527998	1.12895	0.936394	0.860094	0.728741	0.542311	0.12895	0.0285168	0.0107426	0.0805993	0.0143128	0.263122	NO
Q9BT23	LIM domain-containing protein 2	LIMD2	4966.7	4421.1	4362.3	3301.3	2146.6	6211.5	4329.3	4199.6	3338.4	2509	6190.67	4551.98	4032.68	3259.81	2469.62	1	0.890148	0.87831	0.664687	0.432198	1.24643	0.9165	0.811944	0.656334	0.497235	0.246435	0.0263511	-0.0663654	-0.00835314	0.065037	0.263105	NO
O60313	Dynamin-like 120 kDa protein, mitochondrial;Dynamin-like 120 kDa protein, form S1	OPA1	126390	99226	81766	63043	48848	143210	100600	95165	67259	47612	142730	105774	91382.6	65675.7	46864.7	1	0.785078	0.646934	0.498797	0.386486	1.12928	0.836889	0.723021	0.519627	0.370794	0.12928	0.0518109	0.0760866	0.0208299	-0.0156919	0.262316	NO
Q8N4B1	Sesquipedalian-1	FAM109A	7262	6816.4	7193.5	5465.4	5580.4	8872.8	7388.5	7315.7	5924.7	4875.5	8843.04	7768.53	7024.93	5785.23	4798.98	1	0.938639	0.990567	0.752603	0.768438	1.21771	1.06975	0.967355	0.796644	0.660834	0.217715	0.131111	-0.0232125	0.0440415	-0.107605	0.26205	NO
Q8WW38	Zinc finger protein ZFPM2	ZFPM2	45757	48054	45325	34621	29377	50627	48524	44944	37654	34196	50457.2	51019.8	43157.7	36767.6	33659.3	1	1.0502	0.990559	0.756627	0.642022	1.10272	1.11502	0.943193	0.803541	0.735609	0.102721	0.0648172	-0.0473663	0.0469132	0.0935872	0.260672	NO
Q9BQE9	B-cell CLL/lymphoma 7 protein family member B	BCL7B	15914	16613	14387	14315	9318	19211	16441	18663	11969	8791.2	19146.6	17286.6	17921.2	11687.2	8653.22	1	1.04392	0.904047	0.899522	0.585522	1.20313	1.08625	1.12613	0.7344	0.543749	0.203128	0.0423304	0.222083	-0.165122	-0.0417735	0.260645	NO
P23297	Protein S100-A1	S100A1	26770	22879	24117	18536	19267	28945	22642	26187	22463	19107	28847.9	23806.6	25146.2	21934.2	18807.1	1	0.854651	0.900897	0.692417	0.719724	1.07762	0.889301	0.939342	0.819358	0.702544	0.0776215	0.0346505	0.0384451	0.126941	-0.0171796	0.260478	NO
Q96GX2	Putative ataxin-7-like protein 3B	ATXN7L3B	41053	37552	36024	29248	25418	43874	40158	39952	34783	22050	43726.9	42223.5	38364.1	33964.2	21703.9	1	0.91472	0.8775	0.712445	0.619151	1.06513	1.02851	0.934501	0.827325	0.52868	0.0651319	0.113793	0.0570013	0.114881	-0.0904706	0.260336	NO
P56645	Period circadian protein homolog 3	PER3	33890	31662	29934	25518	25714	34035	31941	32264	28694	29468	33920.9	33583.9	30981.6	28018.5	29005.5	1	0.934258	0.883269	0.752965	0.758749	1.00091	0.990968	0.914182	0.826749	0.855871	0.000910485	0.0567097	0.0309129	0.0737837	0.0971224	0.259439	NO
Q96C90	Protein phosphatase 1 regulatory subunit 14B	PPP1R14B	64740	56221	56866	41526	35160	70946	53645	62363	47651	38355	70708.1	56404.2	59884.3	46529.3	37753	1	0.868412	0.878375	0.641427	0.543095	1.09219	0.871242	0.924997	0.71871	0.583148	0.0921852	0.00283038	0.0466223	0.0772826	0.0400524	0.258973	NO
Q9UI14	Prenylated Rab acceptor protein 1	RABAC1	14584	13650	13782	13076	11204	17198	13507	15840	12164	11816	17140.3	14201.7	15210.4	11877.7	11630.5	1	0.935957	0.945008	0.896599	0.768239	1.17528	0.973789	1.04295	0.81443	0.797486	0.175283	0.0378315	0.0979447	-0.0821686	0.0292471	0.258137	NO
Q5TB80	Centrosomal protein of 162 kDa	CEP162	34496	29424	32059	23659	23309	36879	29245	33024	27827	25825	36755.3	30749.2	31711.4	27171.9	25419.7	1	0.852968	0.929354	0.685848	0.675702	1.0655	0.891385	0.919279	0.787684	0.736887	0.0654951	0.0384167	-0.0100756	0.101836	0.0611856	0.256858	NO
P27695	DNA-(apurinic or apyrimidinic site) lyase;DNA-(apurinic or apyrimidinic site) lyase, mitochondrial	APEX1	511530	461330	477760	357940	391490	576640	452080	478140	427240	411020	574706	475333	459136	417183	404569	1	0.901863	0.933982	0.699744	0.765331	1.1235	0.929237	0.897574	0.815558	0.790899	0.123504	0.0273744	-0.0364086	0.115814	0.0255679	0.255852	NO
P29536	Leiomodin-1	LMOD1	10927	9647.2	10181	7371.3	7108.1	12335	9581.4	9673.2	8578.1	8121.2	12293.6	10074.2	9288.73	8376.17	7993.73	1	0.882877	0.931729	0.674595	0.650508	1.12507	0.921957	0.850071	0.766557	0.731558	0.125069	0.0390794	-0.0816573	0.0919619	0.0810499	0.255503	NO
Q96DT6	Cysteine protease ATG4C	ATG4C	77635	73095	71082	56509	49797	76697	75402	78979	59580	59107	76439.8	79280.3	75839.9	58177.5	58179.3	1	0.941521	0.915592	0.72788	0.641425	0.984605	1.02119	0.976878	0.749372	0.749395	-0.0153954	0.0796717	0.0612856	0.0214911	0.10797	0.255023	NO
Q13948	Protein CASP	CUX1	18825	18128	16868	13581	12233	20069	18256	17331	15706	13453	20001.7	19195	16642.2	15336.3	13241.8	1	0.962975	0.896042	0.721434	0.649827	1.06251	1.01965	0.884046	0.814676	0.703418	0.062507	0.05668	-0.0119966	0.0932416	0.0535907	0.254023	NO
Q9H4G0	Band 4.1-like protein 1	EPB41L1	102500	95573	94573	73405	70867	112990	93850	97585	79989	80864	112611	98677.2	93706.4	78106	79594.8	1	0.93242	0.922663	0.716146	0.691385	1.09864	0.962704	0.914209	0.76201	0.776534	0.0986445	0.0302848	-0.00845465	0.0458636	0.0851491	0.251487	NO
P11233	Ras-related protein Ral-A	RALA	209060	204980	175160	126820	115240	228070	206510	187250	138160	126550	227305	217132	179808	134908	124564	1	0.980484	0.837846	0.60662	0.551229	1.08727	1.03861	0.860076	0.645306	0.595828	0.0872722	0.0581263	0.0222309	0.0386858	0.0445982	0.250913	NO
Q9Y5N6	Origin recognition complex subunit 6	ORC6	21807	19786	18596	13433	12517	22130	19466	21414	16998	12098	22055.8	20467.2	20562.9	16597.9	11908.1	1	0.907323	0.852754	0.615995	0.57399	1.01141	0.938563	0.942949	0.761125	0.546068	0.0114084	0.0312394	0.090195	0.14513	-0.0279216	0.250051	NO
Q86Y07	Serine/threonine-protein kinase VRK2	VRK2	51446	45844	41188	30313	25215	51320	44736	45332	36408	29975	51147.9	47037	43530.2	35550.9	29504.5	1	0.891109	0.800606	0.58922	0.490126	0.994205	0.914299	0.846135	0.691034	0.573505	-0.00579467	0.0231894	0.0455281	0.101814	0.0833791	0.248116	YES
P49585	Choline-phosphate cytidylyltransferase A	PCYT1A	111150	95323	80632	62439	47334	122510	98289	87755	64463	52615	122099	103345	84267.1	62945.5	51789.2	1	0.857607	0.725434	0.561754	0.425857	1.09851	0.929775	0.758139	0.566311	0.465939	0.0985077	0.0721683	0.0327045	0.00455699	0.0400825	0.24802	NO
Q96S82	Ubiquitin-like protein 7	UBL7	135830	114800	122430	99330	82028	157590	117000	127090	102460	87251	157061	123018	122039	100048	85881.5	1	0.845174	0.901347	0.731282	0.603902	1.15631	0.905676	0.898466	0.736568	0.632272	0.156309	0.0605015	-0.00288083	0.00528633	0.0283703	0.247586	NO
Q9Y222	Cyclin-D-binding Myb-like transcription factor 1	DMTF1	15233	13516	13289	9108.9	7711.3	16871	13476	13426	10613	8495.9	16814.4	14169.1	12892.4	10363.2	8362.55	1	0.887284	0.872382	0.597972	0.506223	1.10382	0.930161	0.846345	0.68031	0.548976	0.103815	0.0428767	-0.0260374	0.0823387	0.0427526	0.245746	NO
Q8TD19	Serine/threonine-protein kinase Nek9	NEK9	669150	588920	535970	379160	283090	664490	575110	587230	453770	352050	662261	604691	563890	443088	346524	1	0.880102	0.800971	0.566629	0.423059	0.989706	0.90367	0.842696	0.662165	0.517857	-0.0102944	0.0235685	0.0417246	0.0955362	0.0947984	0.245333	YES
Q9Y4P1	Cysteine protease ATG4B	ATG4B	163940	145040	147520	108470	96655	174410	142230	160830	125370	103110	173825	149546	154438	122419	101492	1	0.884714	0.899841	0.661645	0.589575	1.0603	0.912197	0.942038	0.746729	0.619078	0.0602969	0.0274834	0.0421964	0.0850844	0.0295023	0.244563	NO
P25686	DnaJ homolog subfamily B member 2;DnaJ homolog subfamily B member 8	DNAJB2;DNAJB8	8130.4	7085.6	6402.5	4942.4	3758.7	9293.6	7024.4	7694.5	4961.3	3477.4	9262.43	7385.7	7388.68	4844.51	3422.82	1	0.871495	0.787477	0.607891	0.462302	1.13923	0.908406	0.908771	0.595851	0.42099	0.139234	0.036911	0.121295	-0.0120402	-0.0413117	0.244088	NO
Q86SF2	N-acetylgalactosaminyltransferase 7	GALNT7	16163	12392	11658	9286.8	8516.6	19112	11958	11589	10056	9499.4	19047.9	12573.1	11128.4	9819.28	9350.3	1	0.766689	0.721277	0.574572	0.52692	1.17849	0.777892	0.68851	0.607516	0.5785	0.178488	0.0112022	-0.0327671	0.0329442	0.0515808	0.241448	NO
O60504	Vinexin	SORBS3	150000	148680	132700	125470	113910	178520	152180	136300	130760	112070	177921	160007	130883	127682	110311	1	0.9912	0.884667	0.836467	0.7594	1.18614	1.06672	0.872551	0.851212	0.735407	0.186142	0.075516	-0.0121158	0.0147456	-0.0239935	0.240294	NO
Q6JBY9	CapZ-interacting protein	RCSD1	621250	559160	555840	443400	475920	682960	542650	588240	508870	499370	680670	570561	564860	496891	491532	1	0.900056	0.894712	0.713722	0.766068	1.09565	0.918409	0.909231	0.799824	0.791198	0.0956451	0.0183522	0.0145189	0.0861021	0.02513	0.239748	NO
Q6NYC8	Phostensin	PPP1R18	210090	192450	193780	165970	156620	221280	189250	212080	187510	165570	220538	198984	203651	183096	162971	1	0.916036	0.922367	0.789995	0.74549	1.04973	0.947137	0.96935	0.871512	0.775721	0.0497305	0.0311014	0.0469832	0.0815171	0.0302311	0.239563	NO
P0CG22	Putative dehydrogenase/reductase SDR family member 4-like 1	DHRS4L1	23397	23439	21976	11588	9186.3	22849	22311	21933	17632	10806	22772.4	23458.6	21061.3	17216.9	10636.4	1	1.0018	0.939266	0.495277	0.392627	0.973303	1.00263	0.900169	0.735861	0.454605	-0.026697	0.000836422	-0.0390967	0.240584	0.0619777	0.237604	NO
Q8NHG7	Small VCP/p97-interacting protein	SVIP	8404.6	7108.7	7305	6406.6	5871.4	8884	7341.5	7531.4	6997.7	6555.9	8854.21	7719.11	7232.06	6832.97	6453	1	0.845811	0.869167	0.762273	0.698594	1.0535	0.918439	0.860488	0.813004	0.767794	0.0534952	0.0726282	-0.00867883	0.0507306	0.0692003	0.237375	NO
P01111	GTPase NRas	NRAS	32770	28573	30845	22773	23992	33639	28647	31592	26422	27375	33526.2	30120.5	30336.3	25800	26945.3	1	0.871926	0.941257	0.694934	0.732133	1.02308	0.919147	0.925735	0.787306	0.822256	0.0230755	0.0472219	-0.0155219	0.0923715	0.090123	0.23727	NO
Q96S94	Cyclin-L2	CCNL2	45996	39994	39873	29790	22476	50257	43013	44802	30051	21671	50088.5	45225.4	43021.3	29343.6	21330.9	1	0.86951	0.86688	0.647665	0.488651	1.08897	0.983246	0.935327	0.637959	0.463755	0.0889741	0.113736	0.0684474	-0.00970552	-0.0248966	0.236555	NO
Q8IXJ9	Putative Polycomb group protein ASXL1	ASXL1	55978	54972	48483	37738	38507	56957	53756	53662	41300	44397	56766	56520.9	51529.2	40327.8	43700.2	1	0.982029	0.866108	0.674158	0.687895	1.01408	1.0097	0.920525	0.720422	0.780667	0.0140766	0.0276707	0.054417	0.0462642	0.0927714	0.2352	NO
P61024	Cyclin-dependent kinases regulatory subunit 1	CKS1B	117050	98749	80960	50733	45462	112570	102750	104210	53686	48283	112192	108035	100068	52422.2	47525.2	1	0.843648	0.69167	0.43343	0.388398	0.9585	0.922981	0.854917	0.447862	0.406024	-0.0414996	0.0793333	0.163247	0.0144315	0.0176263	0.233139	NO
Q6ZRS2	Helicase SRCAP	SRCAP	68271	66074	48799	43709	36390	85599	60756	52316	45085	36163	85311.9	63881	50236.7	44023.7	35595.4	1	0.967819	0.714784	0.640228	0.533023	1.24961	0.935697	0.735842	0.644837	0.521384	0.249607	-0.0321221	0.0210581	0.00460924	-0.011639	0.231513	NO
Q9NXZ1	Sarcoma antigen 1	SAGE1	51402	48220	48338	44187	38440	55780	48994	52527	42598	44002	55592.9	51514	50439.3	41595.2	43311.4	1	0.938096	0.940391	0.859636	0.747831	1.08153	1.00218	0.981271	0.809214	0.842601	0.0815324	0.0640834	0.0408791	-0.0504217	0.0947698	0.230843	NO
Q03393	6-pyruvoyl tetrahydrobiopterin synthase	PTS	31298	26236	27431	20056	20753	31621	24769	29369	24948	23235	31515	26043	28201.7	24360.7	22870.3	1	0.838264	0.876446	0.640808	0.663078	1.00693	0.832098	0.90107	0.778347	0.730728	0.00693182	-0.00616661	0.0246247	0.13754	0.06765	0.230579	NO
Q5U5Q3	RNA-binding E3 ubiquitin-protein ligase MEX3C	MEX3C	5679.8	4994.7	4454.3	3918	3595.7	6714.1	5066.6	4557.6	4253.3	3455.8	6691.58	5327.2	4376.45	4153.18	3401.56	1	0.87938	0.784235	0.689813	0.633068	1.17814	0.937921	0.77053	0.731219	0.598887	0.178137	0.058541	-0.0137057	0.0414056	-0.034181	0.230197	NO
Q9BV68	E3 ubiquitin-protein ligase RNF126	RNF126	42829	37921	29939	16496	13604	45875	35749	32943	18641	17782	45721.1	37587.8	31633.7	18202.2	17502.9	1	0.885405	0.699036	0.38516	0.317635	1.06753	0.877624	0.738604	0.424997	0.408669	0.0675278	-0.00778082	0.0395679	0.0398371	0.0910341	0.230186	NO
Q13951	Core-binding factor subunit beta	CBFB	212730	186030	190380	148900	157690	231320	182210	191460	174590	170850	230544	191582	183850	170480	168168	1	0.874489	0.894937	0.699948	0.741268	1.08374	0.900588	0.864242	0.801392	0.790525	0.083741	0.0260988	-0.030695	0.101443	0.0492567	0.229845	NO
Q9Y259	Choline/ethanolamine kinase	CHKB	12872	11892	11854	10282	10366	13342	11866	13169	11377	10864	13297.3	12476.3	12645.6	11109.2	10693.5	1	0.923866	0.920914	0.798788	0.805314	1.03304	0.969261	0.98241	0.86305	0.830755	0.0330372	0.0453954	0.0614968	0.064262	0.0254414	0.229633	NO
O95400	CD2 antigen cytoplasmic tail-binding protein 2	CD2BP2	21517	19894	18494	12560	9178.9	22183	19782	20100	13603	11250	22108.6	20799.5	19301.1	13282.8	11073.4	1	0.924571	0.859506	0.583724	0.426588	1.02749	0.966654	0.897017	0.617316	0.514636	0.0274948	0.0420826	0.0375102	0.0335911	0.0880477	0.228726	NO
Q9H7E9	UPF0488 protein C8orf33	C8orf33	64089	53178	50799	42638	36318	72660	50624	55921	44660	39198	72416.3	53227.9	53698.4	43608.7	38582.8	1	0.829752	0.792632	0.665294	0.566681	1.12993	0.83053	0.837872	0.680439	0.602018	0.129934	0.000777877	0.0452398	0.0151458	0.0353377	0.226435	NO
Q06413	Myocyte-specific enhancer factor 2C	MEF2C	34114	30087	27379	23695	21197	36982	30165	30997	24683	22101	36858	31716.5	29765	24102	21754.1	1	0.881955	0.802574	0.694583	0.621358	1.08044	0.929722	0.872516	0.706512	0.637689	0.0804354	0.0477675	0.0699419	0.0119291	0.0163308	0.226405	NO
P12829	Myosin light chain 4	MYL4	370980	315110	281820	204800	204890	384410	316780	315220	232460	218850	383121	333074	302691	226988	215415	1	0.849399	0.759664	0.552051	0.552294	1.03273	0.897821	0.815924	0.61186	0.580665	0.0327263	0.0484221	0.0562599	0.0598086	0.0283708	0.225588	NO
Q9UNZ5	Leydig cell tumor 10 kDa protein homolog	C19orf53	52718	47297	48674	42544	42832	56836	46061	51057	47924	45754	56645.4	48430.2	49027.7	46795.8	45035.9	1	0.89717	0.92329	0.807011	0.812474	1.0745	0.918664	0.929999	0.887664	0.854279	0.0744981	0.0214946	0.00670918	0.0806526	0.0418047	0.225159	NO
Q5M775	Cytospin-B	SPECC1	341000	301430	284640	234010	204810	327130	316730	320680	250750	234470	326033	333021	307934	244847	230790	1	0.883959	0.834721	0.686246	0.600616	0.956108	0.976601	0.903033	0.718027	0.676803	-0.0438918	0.0926424	0.0683117	0.0317807	0.0761872	0.22503	NO
Q9Y6U3	Adseverin	SCIN	19619	18806	17626	13712	13802	20713	18977	18879	15107	14715	20643.5	19953.1	18128.6	14751.4	14484	1	0.958561	0.898415	0.698914	0.703502	1.05222	1.01703	0.924035	0.751892	0.738266	0.0522215	0.0584681	0.0256199	0.0529779	0.0347641	0.224052	NO
P53985	Monocarboxylate transporter 1	SLC16A1	34045	29850	29623	23691	25947	31417	31232	34725	26690	27660	31311.6	32838.4	33344.8	26061.7	27225.9	1	0.876781	0.870113	0.695873	0.762138	0.919713	0.964559	0.979434	0.765508	0.799702	-0.0802868	0.0877786	0.109321	0.0696344	0.0375637	0.224011	NO
P36551	Oxygen-dependent coproporphyrinogen-III oxidase, mitochondrial	CPOX	851520	725450	698070	531750	502930	878900	703850	756250	622300	559230	875952	740053	726192	607651	550452	1	0.851947	0.819793	0.624472	0.590626	1.02869	0.869096	0.852819	0.713607	0.646435	0.0286927	0.0171489	0.0330259	0.0891356	0.055809	0.223812	NO
P62330	ADP-ribosylation factor 6	ARF6	48917	40222	37810	21275	19709	47049	41501	41414	26312	23249	46891.2	43635.6	39768	25692.6	22884.1	1	0.82225	0.772942	0.43492	0.402907	0.958587	0.892034	0.812968	0.525229	0.467815	-0.0414128	0.0697837	0.0400263	0.0903081	0.0649077	0.223613	NO
P35712	Transcription factor SOX-6	SOX6	32246	27215	27831	24967	21892	36828	25834	30104	24843	24672	36704.5	27162.8	28907.5	24258.2	24284.8	1	0.843981	0.863084	0.774267	0.678906	1.13826	0.842361	0.896467	0.752285	0.753109	0.138265	-0.00161955	0.0333837	-0.0219815	0.0742032	0.222251	NO
P47224	Guanine nucleotide exchange factor MSS4	RABIF	8080	8258.4	6418.9	6419.8	5192.6	9307.5	8215.6	6961	6896.6	4907.4	9276.29	8638.17	6684.33	6734.25	4830.37	1	1.02208	0.794418	0.79453	0.642649	1.14806	1.06908	0.827268	0.833447	0.597819	0.148055	0.0470013	0.0328501	0.0389172	-0.0448298	0.221994	NO
Q16656	Nuclear respiratory factor 1	NRF1	73400	56276	55524	38927	28642	87332	52173	59325	44971	26678	87039.1	54856.5	56967.1	43912.4	26259.3	1	0.766703	0.756458	0.530341	0.390218	1.18582	0.747364	0.776118	0.598261	0.357756	0.185819	-0.0193389	0.0196604	0.0679204	-0.0324623	0.221599	NO
Q9NVM6	DnaJ homolog subfamily C member 17	DNAJC17	227240	208870	204520	171620	165390	268590	203970	209220	183610	168220	267689	214461	200904	179288	165580	1	0.91916	0.900018	0.755237	0.727821	1.178	0.943765	0.884107	0.78898	0.728655	0.178002	0.024605	-0.0159111	0.0337429	0.000834653	0.221274	NO
Q96KC8	DnaJ homolog subfamily C member 1	DNAJC1	155190	139140	143270	116290	118080	162460	135200	154350	130280	128820	161915	142154	148215	127213	126798	1	0.896578	0.923191	0.74934	0.760874	1.04333	0.916	0.955057	0.819725	0.817051	0.043335	0.0194216	0.0318656	0.0703856	0.0561768	0.221185	NO
Q96AT1	Uncharacterized protein KIAA1143	KIAA1143	340160	297940	309750	246940	245460	351350	302520	327120	276060	267520	350172	318080	314118	269561	263321	1	0.875882	0.910601	0.725952	0.721602	1.02943	0.93509	0.923443	0.792455	0.774109	0.0294322	0.0592079	0.012842	0.0665023	0.0525079	0.220492	NO
P21127	Cyclin-dependent kinase 11B	CDK11B	572730	453470	402960	339890	319150	648290	442670	435980	373120	324760	646116	465439	418652	364337	319663	1	0.791769	0.703578	0.593456	0.557243	1.12813	0.812667	0.730975	0.63614	0.558138	0.128133	0.0208978	0.0273979	0.0426843	0.000895115	0.220008	YES
Q9Y5J7	Mitochondrial import inner membrane translocase subunit Tim9	TIMM9	12428	11298	11453	8910.7	7515.5	12866	11574	11816	9463.3	8878.4	12822.9	12169.3	11346.4	9240.53	8739.05	1	0.909076	0.921548	0.716986	0.604723	1.03177	0.979185	0.912968	0.743525	0.703174	0.0317711	0.0701087	-0.00858041	0.0265392	0.0984508	0.218289	NO
Q9UHY1	Nuclear receptor-binding protein	NRBP1	279350	245850	234400	165920	140080	305440	241090	259710	178170	147360	304416	253491	249388	173976	145047	1	0.880079	0.839091	0.59395	0.50145	1.08973	0.90743	0.892742	0.622788	0.519231	0.0897284	0.027351	0.0536517	0.0288376	0.0177808	0.21735	YES
Q9UQR0	Sex comb on midleg-like protein 2	SCML2	126440	120340	114040	101460	85721	132560	122110	128660	100530	94733	132115	128391	123546	98163.5	93246.1	1	0.951756	0.90193	0.802436	0.677958	1.04489	1.01543	0.977114	0.776364	0.737473	0.0448864	0.0636725	0.0751842	-0.0260719	0.0595152	0.217186	NO
Q16890	Tumor protein D53	TPD52L1	192120	190310	176330	146860	155790	193250	180810	191040	171070	172470	192602	190110	183447	167043	169763	1	0.990579	0.917812	0.764418	0.810899	1.00251	0.989538	0.954856	0.869472	0.88363	0.0025083	-0.00104106	0.0370443	0.105054	0.0727304	0.216296	NO
Q9UK61	Protein FAM208A	FAM208A	67927	68500	62205	54311	47558	70085	68847	73971	57053	46880	69850	72388.2	71031	55709.9	46144.2	1	1.00844	0.915763	0.79955	0.700134	1.02831	1.06568	1.0457	0.820144	0.67932	0.0283091	0.0572402	0.129933	0.0205948	-0.0208137	0.215263	NO
Q9NUQ9	Protein FAM49B	FAM49B	584790	503880	502650	357480	339130	590610	496840	545850	431430	362740	588629	522395	524155	421274	357047	1	0.861643	0.859539	0.611296	0.579918	1.00657	0.893304	0.896313	0.720385	0.610555	0.0065652	0.031661	0.0367734	0.109089	0.0306376	0.214726	NO
O75414	Nucleoside diphosphate kinase 6	NME6	11028	9453.1	8890.2	7058.8	5893.3	12114	9503.1	9643.4	7881.8	5756	12073.4	9991.89	9260.11	7696.26	5665.66	1	0.857191	0.806148	0.64008	0.534394	1.09479	0.906048	0.839691	0.697883	0.513752	0.0947926	0.0488569	0.0335432	0.0578036	-0.0206424	0.214354	NO
Q99574	Neuroserpin	SERPINI1	37610	35331	33832	32749	30767	42940	33187	37578	32834	33032	42796	34894	36084.4	32061.1	32513.5	1	0.939404	0.899548	0.870752	0.818054	1.13789	0.927785	0.959437	0.852461	0.864492	0.137889	-0.0116198	0.0598891	-0.0182911	0.0464382	0.214305	NO
P30041	Peroxiredoxin-6	PRDX6	2114100	1775700	1876200	1388000	1507900	2334600	1698400	1876300	1612000	1652100	2.32677e+06	1.78576e+06	1.80172e+06	1.57405e+06	1.62617e+06	1	0.839932	0.88747	0.656544	0.713259	1.1006	0.844689	0.852242	0.74455	0.769202	0.100596	0.00475733	-0.0352278	0.0880056	0.055943	0.214074	NO
P51858	Hepatoma-derived growth factor	HDGF	1869700	1593800	1697300	1332400	1449700	2009400	1572100	1794900	1516900	1505900	2.00266e+06	1.65296e+06	1.72356e+06	1.48119e+06	1.48226e+06	1	0.852436	0.907793	0.712628	0.775365	1.07111	0.884078	0.921838	0.792208	0.792782	0.0711136	0.0316421	0.0140451	0.0795804	0.0174166	0.213798	NO
O43818	U3 small nucleolar RNA-interacting protein 2	RRP9	170980	146810	149960	125320	116080	175040	154510	157480	133750	128970	174453	162457	151221	130601	126946	1	0.858638	0.877062	0.732951	0.67891	1.02031	0.950154	0.884436	0.763841	0.742459	0.0203121	0.0915151	0.00737407	0.0308893	0.0635497	0.21364	NO
P51808	Dynein light chain Tctex-type 3	DYNLT3	39173	31391	32690	23166	19709	44550	30341	34405	25495	20579	44400.6	31901.6	33037.5	24894.8	20256	1	0.801343	0.834503	0.591377	0.503127	1.13345	0.814377	0.843375	0.63551	0.517091	0.133449	0.0130343	0.00887201	0.0441333	0.0139636	0.213452	NO
O60613	15 kDa selenoprotein	44454	98954	88399	87824	70301	64176	113510	86386	91287	76120	65853	113129	90829.3	87658.7	74328.1	64819.4	1	0.893334	0.887523	0.710441	0.648544	1.14325	0.917894	0.885853	0.751138	0.655046	0.143252	0.0245597	-0.00167029	0.0406967	0.00650191	0.21334	NO
Q86WQ0	Nuclear receptor 2C2-associated protein	NR2C2AP	170890	144740	144580	102690	88020	204000	129870	142920	119400	94996	203316	136550	137240	116589	93505	1	0.846978	0.846041	0.600913	0.515068	1.18975	0.799051	0.803087	0.682247	0.547165	0.189747	-0.0479262	-0.0429544	0.0813346	0.0320965	0.212297	NO
O95405	Zinc finger FYVE domain-containing protein 9	ZFYVE9	24011	22079	20404	17036	17483	24452	20510	22587	19250	20002	24370	21564.9	21689.3	18796.8	19688.1	1	0.919537	0.849777	0.709508	0.728125	1.01495	0.898127	0.903305	0.782843	0.81996	0.0149513	-0.0214096	0.053528	0.073335	0.0918352	0.21224	NO
Q01167	Forkhead box protein K2	FOXK2	31497	28787	26441	20683	20290	34430	26900	27423	23889	22464	34314.5	28283.6	26333	23326.6	22111.4	1	0.91396	0.839477	0.656666	0.644188	1.08945	0.897978	0.836049	0.740599	0.702016	0.089454	-0.0159823	-0.00342735	0.0839331	0.0578281	0.211806	NO
Q9NXF7	DDB1- and CUL4-associated factor 16	DCAF16	43250	40958	23185	25303	19036	59958	34580	23255	23127	20163	59756.9	36358.6	22330.7	22582.6	19846.5	1	0.947006	0.536069	0.58504	0.440139	1.38166	0.840662	0.516317	0.522141	0.458879	0.381663	-0.106344	-0.0197524	-0.0628999	0.0187405	0.211407	NO
Q16740	ATP-dependent Clp protease proteolytic subunit, mitochondrial	CLPP	235590	214770	209170	162000	178230	237840	210880	221500	190690	194910	237042	221727	212696	186201	191851	1	0.911626	0.887856	0.687635	0.756526	1.00616	0.941155	0.902824	0.790361	0.814342	0.00616475	0.0295286	0.0149679	0.102725	0.0578155	0.211202	NO
P49006	MARCKS-related protein	MARCKSL1	211690	187620	197420	158200	158920	216400	182070	202330	181300	182950	215674	191435	194288	177032	180078	1	0.886296	0.93259	0.747319	0.75072	1.01882	0.904317	0.917796	0.83628	0.850671	0.0188212	0.0180207	-0.0147942	0.0889608	0.0999503	0.210959	NO
Q9BRA0	N-alpha-acetyltransferase 38, NatC auxiliary subunit	NAA38	43628	40289	38588	29097	28143	44892	39588	39485	32920	33031	44741.4	41624.2	37915.6	32145	32512.6	1	0.923467	0.884478	0.666934	0.645067	1.02552	0.954071	0.869067	0.736799	0.745222	0.0255213	0.0306045	-0.0154113	0.0698645	0.100155	0.210734	NO
Q14135	Transcription cofactor vestigial-like protein 4	VGLL4	17400	16109	16291	14327	13546	18028	16276	16912	15553	15063	17967.5	17113.2	16239.8	15186.9	14826.6	1	0.925805	0.936264	0.823391	0.778506	1.03262	0.983515	0.933323	0.872809	0.852102	0.0326172	0.0577103	-0.00294151	0.0494181	0.0735963	0.2104	NO
Q9BUB5	MAP kinase-interacting serine/threonine-protein kinase 1	MKNK1	64373	56242	47088	41537	36985	71672	55171	53725	44509	35768	71431.6	58008.7	51589.7	43461.2	35206.6	1	0.873689	0.731487	0.645255	0.574542	1.10965	0.901134	0.801418	0.675147	0.546916	0.109652	0.0274452	0.0699308	0.029892	-0.0276266	0.209293	YES
P02654	Apolipoprotein C-I;Truncated apolipoprotein C-I	APOC1	83291	75522	59689	47579	37333	91919	72367	69190	49705	38752	91610.7	76089.2	66440	48534.9	38143.8	1	0.906725	0.716632	0.571238	0.448224	1.09989	0.913535	0.797685	0.582715	0.457958	0.0998875	0.00680996	0.081053	0.0114769	0.00973406	0.208961	NO
Q14691	DNA replication complex GINS protein PSF1	GINS1	304540	275350	275070	228480	233990	320720	279220	279660	254190	255080	319644	293582	268545	248206	251076	1	0.904151	0.903231	0.750246	0.768339	1.0496	0.964017	0.881804	0.81502	0.824445	0.0495974	0.0598664	-0.0214268	0.0647739	0.0561054	0.208916	NO
Q53FT3	Protein Hikeshi	C11orf73	196010	174340	181670	142060	145140	205550	176300	181280	168430	153690	204861	185368	174075	164465	151278	1	0.889444	0.92684	0.724759	0.740472	1.04515	0.945707	0.888092	0.839065	0.771786	0.045154	0.0562625	-0.0387487	0.114306	0.0313133	0.208287	NO
Q01459	Di-N-acetylchitobiase	CTBS	262390	251290	246030	197830	217460	271110	241180	247470	240190	237380	270201	253585	237634	234536	233654	1	0.957697	0.93765	0.753954	0.828766	1.02977	0.966444	0.905652	0.893844	0.890484	0.0297678	0.00874702	-0.0319978	0.13989	0.0617179	0.208125	NO
Q86UY8	5-nucleotidase domain-containing protein 3	NT5DC3	96845	88617	85017	75746	61628	99133	84785	99356	78773	68810	98800.5	89145.9	95407	76918.6	67730	1	0.915039	0.877867	0.782136	0.636357	1.02019	0.920501	0.985152	0.794245	0.699365	0.0201924	0.00546161	0.107285	0.0121085	0.0630077	0.208055	NO
P47755	F-actin-capping protein subunit alpha-2	CAPZA2	270940	224160	233990	178520	185370	290760	223380	240920	204270	196960	289785	234870	231344	199461	193869	1	0.827342	0.863623	0.658891	0.684174	1.06955	0.866869	0.853859	0.736183	0.715541	0.0695537	0.0395275	-0.00976444	0.0772916	0.031367	0.207975	NO
Q92614	Unconventional myosin-XVIIIa	MYO18A	581530	502200	355200	207670	179300	613070	480120	460680	224360	171940	611014	504815	442370	219078	169241	1	0.863584	0.610803	0.35711	0.308325	1.0507	0.868081	0.7607	0.376728	0.291028	0.0507006	0.00449684	0.149897	0.019618	-0.017297	0.207416	NO
O43422	52 kDa repressor of the inhibitor of the protein kinase	PRKRIR	9064.6	9532	6614.5	5611.1	3697.5	10868	7824.7	8745.7	5135.6	3988.4	10831.6	8227.16	8398.09	5014.71	3925.8	1	1.05156	0.729707	0.619012	0.407905	1.19493	0.907615	0.926472	0.553219	0.433091	0.194929	-0.143948	0.196765	-0.0657938	0.0251858	0.207137	NO
Q9BZL4	Protein phosphatase 1 regulatory subunit 12C	PPP1R12C	123340	114520	108430	98363	81831	136070	121010	116990	95626	84687	135614	127234	112340	93374.9	83357.8	1	0.92849	0.879115	0.797495	0.663459	1.09951	1.03157	0.910817	0.757053	0.675837	0.0995108	0.103082	0.031702	-0.0404417	0.0123786	0.206232	NO
Q4ADV7	RAB6A-GEF complex partner protein 1	RIC1	30930	26875	22336	20262	13675	40004	25115	24438	18498	12852	39869.8	26406.8	23466.7	18062.5	12650.3	1	0.868898	0.722147	0.655092	0.442127	1.28903	0.85376	0.758703	0.583982	0.408997	0.289035	-0.0151376	0.0365564	-0.0711106	-0.0331303	0.206212	NO
Q8WUX2	Putative glutathione-specific gamma-glutamylcyclotransferase 2	CHAC2	146700	128200	136360	114650	113340	159630	126910	137610	124480	125130	159095	133438	132141	121550	123166	1	0.873892	0.929516	0.781527	0.772597	1.08449	0.909595	0.900754	0.82856	0.839577	0.0844898	0.035703	-0.0287623	0.0470326	0.0669802	0.205443	NO
Q53RE8	Ankyrin repeat domain-containing protein 39	ANKRD39	5991.3	5647.5	3670.8	4105.9	3324.1	7046.8	4912.9	5180.4	3647.7	3294.1	7023.17	5165.6	4974.5	3561.83	3242.4	1	0.942617	0.612688	0.68531	0.554821	1.17223	0.862183	0.830287	0.594501	0.541184	0.172228	-0.080434	0.217599	-0.0908098	-0.013637	0.204946	NO
Q9H8V3	Protein ECT2	ECT2	17350	16504	15101	11225	9650.2	18669	15479	16056	12562	10991	18606.4	16275.2	15417.8	12266.3	10818.5	1	0.951239	0.870375	0.646974	0.556207	1.07241	0.93805	0.888636	0.70699	0.623544	0.0724144	-0.0131893	0.0182617	0.0600164	0.0673365	0.20484	NO
Q9ULI1	NACHT and WD repeat domain-containing protein 2	NWD2	51959	46188	44143	36242	34292	50565	49017	51708	39465	33849	50395.4	51538.2	49652.8	38536	33317.7	1	0.888932	0.849574	0.697511	0.659982	0.969907	0.991901	0.955615	0.741661	0.641231	-0.0300926	0.10297	0.106042	0.0441497	-0.018751	0.204317	NO
Q9ULH0	Kinase D-interacting substrate of 220 kDa	KIDINS220	173820	146880	152110	122670	111560	180630	145090	165170	133380	123040	180024	152553	158605	130240	121109	1	0.845012	0.875101	0.70573	0.641813	1.03569	0.877648	0.912468	0.749282	0.696748	0.0356934	0.0326356	0.0373672	0.0435518	0.054935	0.204183	NO
O95243	Methyl-CpG-binding domain protein 4	MBD4	12882	10384	8228.5	6845.4	4997	12444	9883.8	8488.5	9209.6	6119.2	12402.3	10392.2	8151.12	8992.8	6023.15	1	0.806086	0.63876	0.531393	0.387906	0.962759	0.806721	0.632752	0.69809	0.467564	-0.0372406	0.000634591	-0.00600706	0.166698	0.079658	0.203743	NO
Q562F6	Shugoshin-like 2	SGOL2	31246	28281	25260	18843	17508	30782	26439	26584	23995	20373	30678.8	27798.9	25527.4	23430.1	20053.2	1	0.905108	0.808423	0.603053	0.560328	0.981846	0.889678	0.816981	0.749861	0.641786	-0.0181538	-0.0154294	0.00855775	0.146807	0.0814578	0.20324	NO
O75030	Microphthalmia-associated transcription factor	MITF	102090	97639	84924	71776	79501	106130	95096	91760	82476	83539	105774	99987.3	88112.9	80534.5	82227.8	1	0.956401	0.831854	0.703066	0.778734	1.03609	0.979403	0.863091	0.788858	0.805444	0.0360865	0.023002	0.0312363	0.0857917	0.0267097	0.202826	NO
Q9BSD7	Cancer-related nucleoside-triphosphatase	NTPCR	190750	184920	183750	147690	142210	195000	185850	195060	161080	156030	194346	195409	187307	157288	153581	1	0.969436	0.963303	0.77426	0.745531	1.01885	1.02443	0.981951	0.824577	0.805143	0.018852	0.0549894	0.0186483	0.0503177	0.059612	0.202419	NO
P18669	Phosphoglycerate mutase 1	PGAM1	1974700	1794100	1809300	1419900	1510200	2063800	1757400	1858700	1652200	1629400	2.05688e+06	1.84779e+06	1.78482e+06	1.61331e+06	1.60383e+06	1	0.908543	0.91624	0.719046	0.764774	1.04162	0.935733	0.903846	0.816988	0.812187	0.0416157	0.02719	-0.0123946	0.0979422	0.0474125	0.201766	NO
Q6UX04	Peptidyl-prolyl cis-trans isomerase CWC27 homolog	CWC27	400120	375900	307680	202080	188760	416610	367910	358900	246140	170900	415213	386834	344635	240346	168218	1	0.939468	0.768969	0.505048	0.471758	1.03772	0.966794	0.86133	0.600684	0.420418	0.0377207	0.0273256	0.0923603	0.0956357	-0.0513406	0.201702	NO
Q86SZ2	Trafficking protein particle complex subunit 6B	TRAPPC6B	201250	169040	147130	117350	111400	208400	156470	151630	158180	116280	207701	164518	145603	154456	114455	1	0.83995	0.731081	0.583106	0.55354	1.03206	0.817481	0.723495	0.767485	0.56872	0.0320551	-0.0224693	-0.00758593	0.184379	0.0151796	0.201559	NO
Q15056	Eukaryotic translation initiation factor 4H	EIF4H	494510	465640	453560	350380	380360	559780	472490	444110	395250	383020	557903	496793	426458	385946	377008	1	0.941619	0.917191	0.70854	0.769165	1.12819	1.00462	0.862386	0.780461	0.762387	0.128193	0.0629969	-0.0548048	0.0719209	-0.00677797	0.201528	NO
Q8WWZ3	Ectodysplasin-A receptor-associated adapter protein	EDARADD	29591	30054	28250	23819	23813	30326	29884	30321	26990	24763	30224.3	31421.1	29115.9	26354.6	24374.3	1	1.01565	0.954682	0.804941	0.804738	1.0214	1.06185	0.983943	0.89063	0.823707	0.0214016	0.0461995	0.0292611	0.0856896	0.0189695	0.201521	NO
O75864	Protein phosphatase 1 regulatory subunit 37	PPP1R37	19231	19088	19469	20345	19054	25205	18432	19822	19762	18508	25120.5	19380.1	19034.2	19296.8	18217.5	1	0.992564	1.01238	1.05793	0.990796	1.30625	1.00775	0.989764	1.00342	0.947299	0.306249	0.0151866	-0.0226116	-0.0545061	-0.0434973	0.20082	NO
P51153	Ras-related protein Rab-13	RAB13	85056	66038	49206	32888	29802	83641	65360	57688	41254	32798	83360.5	68721.8	55395.1	40282.9	32283.2	1	0.776406	0.578513	0.386663	0.350381	0.980066	0.807959	0.651278	0.473604	0.379552	-0.019934	0.0315534	0.0727655	0.0869411	0.0291715	0.200497	NO
P56537	Eukaryotic translation initiation factor 6	EIF6	381990	330370	356820	271870	275840	408830	332500	377950	300470	284530	407459	349602	362928	293397	280064	1	0.864866	0.934108	0.71172	0.722113	1.06667	0.915213	0.950098	0.768075	0.733171	0.0666743	0.0503474	0.0159901	0.0563543	0.0110581	0.200424	NO
Q6NZ67	Mitotic-spindle organizing protein 2B;Mitotic-spindle organizing protein 2A	MZT2B;MZT2A	15537	14304	12638	11836	10580	16872	13878	14960	12009	10676	16815.4	14591.8	14365.4	11726.3	10508.4	1	0.920641	0.813413	0.761794	0.680955	1.08228	0.939166	0.924593	0.754734	0.676349	0.082282	0.0185246	0.11118	-0.00706042	-0.00460626	0.20032	NO
P20042	Eukaryotic translation initiation factor 2 subunit 2	EIF2S2	869360	807160	858270	620830	660510	896920	797220	905020	711060	705820	893912	838225	869049	694321	694742	1	0.928453	0.987243	0.714123	0.759766	1.02824	0.964186	0.999642	0.798658	0.799141	0.0282414	0.0357333	0.012399	0.0845349	0.0393757	0.200284	NO
P63165	Small ubiquitin-related modifier 1	SUMO1	192650	170760	169000	123160	133320	199880	173770	174160	147300	136570	199210	182708	167238	143832	134426	1	0.886374	0.877239	0.639294	0.692032	1.03405	0.948393	0.868092	0.7466	0.697775	0.0340496	0.0620186	-0.00914686	0.107306	0.00574324	0.199971	NO
Q15653	NF-kappa-B inhibitor beta	NFKBIB	83105	69698	70133	46663	39774	91839	65885	75489	54025	40560	91531	69273.8	72488.6	52753.2	39923.4	1	0.838674	0.843908	0.561494	0.478599	1.10139	0.83357	0.872253	0.634778	0.480397	0.10139	-0.00510432	0.0283451	0.0732835	0.00179751	0.199712	NO
P67870	Casein kinase II subunit beta	CSNK2B	513740	408880	420870	274680	224170	561670	401320	446340	324820	220780	559786	421962	428600	317174	217315	1	0.795889	0.819228	0.534667	0.436349	1.08963	0.821353	0.834274	0.617382	0.423005	0.0896296	0.0254642	0.0150462	0.0827142	-0.0133439	0.19951	NO
Q9ULC3	Ras-related protein Rab-23	RAB23	169610	147190	150660	132100	116710	183320	149900	166320	131920	123140	182705	157610	159709	128815	121207	1	0.867814	0.888273	0.778846	0.688108	1.07721	0.92925	0.941628	0.759475	0.714623	0.0772077	0.0614358	0.0533546	-0.0193707	0.0265151	0.199143	NO
Q13277	Syntaxin-3	STX3	62952	53298	57282	49286	46748	68860	55100	60568	52570	46776	68629.1	57934.1	58160.7	51332.5	46041.8	1	0.846645	0.909931	0.782914	0.742598	1.09018	0.92029	0.923889	0.815422	0.73138	0.0901808	0.0736446	0.0139578	0.0325085	-0.0112178	0.199074	NO
Q8NDV7	Trinucleotide repeat-containing gene 6A protein	TNRC6A	24136	20708	19079	16868	16297	24170	22781	21385	17803	16182	24088.9	23952.7	20535	17383.9	15928	1	0.857971	0.790479	0.698873	0.675215	0.99805	0.992407	0.850805	0.720248	0.659928	-0.00194975	0.134436	0.0603263	0.0213751	-0.0152879	0.1989	NO
P35251	Replication factor C subunit 1	RFC1	305780	259660	270620	207280	212560	342790	258250	268930	231020	223220	341640	271533	258241	225582	219716	1	0.849173	0.885015	0.677873	0.69514	1.11728	0.888002	0.844532	0.737725	0.718544	0.117275	0.038829	-0.0404829	0.0598524	0.0234038	0.198877	NO
Q5TDH0	Protein DDI1 homolog 2	DDI2	649780	636580	589810	454380	484430	646190	601760	621520	533970	557800	644023	632712	596817	521400	549045	1	0.979685	0.907707	0.699283	0.745529	0.99114	0.973732	0.918491	0.802426	0.84497	-0.00886013	-0.00595337	0.0107839	0.103143	0.0994412	0.198554	NO
Q9BQ69	O-acetyl-ADP-ribose deacetylase MACROD1	MACROD1	227130	211240	183660	142290	119890	240280	203210	198780	157410	133600	239474	213662	190879	153704	131503	1	0.93004	0.808612	0.626469	0.527847	1.05435	0.940704	0.840397	0.676725	0.578977	0.0543485	0.0106641	0.0317849	0.0502553	0.0511295	0.198182	NO
Q99523	Sortilin	SORT1	112890	99959	96239	78902	69520	121230	107700	99933	80450	72408	120823	113240	95961.1	78556.2	71271.5	1	0.885455	0.852502	0.698928	0.615821	1.07028	1.0031	0.850041	0.695865	0.631336	0.0702757	0.117642	-0.00246191	-0.00306344	0.0155151	0.197907	NO
P53367	Arfaptin-1	ARFIP1	407800	389770	367950	282950	255690	412810	360600	382580	361920	277780	411426	379148	367374	353400	273420	1	0.955787	0.902281	0.693845	0.626999	1.00889	0.929739	0.900868	0.866602	0.670476	0.00889052	-0.0260483	-0.0014124	0.172757	0.0434773	0.197664	NO
Q16619	Cardiotrophin-1	CTF1	11520	10493	10649	9541	8249.3	13434	9503	11193	9217.4	9751.9	13388.9	9991.79	10748.1	9000.42	9598.84	1	0.910851	0.924392	0.828212	0.716085	1.16223	0.867343	0.932997	0.781286	0.833232	0.162235	-0.043508	0.00860455	-0.0469255	0.117147	0.197553	NO
Q96K17	Transcription factor BTF3 homolog 4	BTF3L4	266140	232860	250180	197960	176860	264180	231450	268230	210370	210180	263294	243355	257569	205418	206881	1	0.874953	0.940032	0.743819	0.664537	0.989306	0.914386	0.967795	0.771841	0.777339	-0.0106936	0.0394329	0.0277634	0.028022	0.112802	0.197327	NO
P35579	Myosin-9	MYH9	6109900	5350100	5118600	3817400	3924900	6323900	5212500	5420900	4422200	4286500	6.30269e+06	5.48061e+06	5.20544e+06	4.3181e+06	4.21922e+06	1	0.875644	0.837755	0.624789	0.642384	1.03155	0.897004	0.851968	0.706738	0.690555	0.0315539	0.0213597	0.0142133	0.0819488	0.0481711	0.197247	NO
Q15118	[Pyruvate dehydrogenase (acetyl-transferring)] kinase isozyme 1, mitochondrial	PDK1	23138	21339	18351	15191	12623	26332	20329	21071	15576	12338	26243.7	21374.6	20233.5	15209.3	12144.3	1	0.922249	0.793111	0.656539	0.545553	1.13422	0.923789	0.874471	0.657331	0.524866	0.134225	0.00153969	0.0813603	0.00079235	-0.0206869	0.19723	YES
P49321	Nuclear autoantigenic sperm protein	NASP	2494500	2196100	2264300	1736400	1902200	2648100	2169200	2306000	2026600	2002400	2.63922e+06	2.28077e+06	2.21435e+06	1.97889e+06	1.97097e+06	1	0.880377	0.907717	0.696091	0.762558	1.05802	0.914321	0.887691	0.793302	0.790127	0.0580152	0.0339439	-0.0200257	0.097211	0.027569	0.196714	NO
O15118	Niemann-Pick C1 protein	NPC1	59648	56888	54399	43103	45291	65559	54393	54500	48560	49541	65339.1	57190.7	52333.8	47416.9	48763.4	1	0.953729	0.912	0.722623	0.759305	1.09541	0.958804	0.877378	0.794945	0.81752	0.095412	0.00507498	-0.0346223	0.0723222	0.0582152	0.196402	NO
P0DP25			1270600	1065300	1158800	842350	900220	1334200	1047200	1181100	1004700	955640	1.32973e+06	1.10106e+06	1.13416e+06	981049	940641	1	0.838423	0.91201	0.662955	0.7085	1.04653	0.866569	0.892615	0.772115	0.740312	0.0465335	0.0281465	-0.0193954	0.10916	0.0318122	0.196257	NO
Q96S66	Chloride channel CLIC-like protein 1	CLCC1	26770	23749	24695	20967	19065	29468	23515	25868	20637	21746	29369.2	24724.5	24839.9	20151.2	21404.7	1	0.88715	0.922488	0.783227	0.712178	1.09709	0.92359	0.927899	0.752753	0.799577	0.0970927	0.03644	0.00541104	-0.0304746	0.0873994	0.195869	NO
Q5XUX1	F-box/WD repeat-containing protein 9	FBXW9	111050	99865	88821	81440	73982	114400	100230	99941	86125	78655	114016	105385	95968.8	84097.6	77420.5	1	0.89928	0.799829	0.733363	0.666204	1.02671	0.94899	0.864194	0.757295	0.697168	0.0267117	0.0497105	0.0643652	0.0239313	0.0309631	0.195682	NO
Q13546	Receptor-interacting serine/threonine-protein kinase 1	RIPK1	453900	381050	287990	172950	144350	465020	355740	347940	205720	159040	463460	374038	334111	200877	156544	1	0.839502	0.634479	0.381031	0.318022	1.02106	0.824053	0.736089	0.442558	0.344886	0.0210629	-0.0154493	0.10161	0.0615273	0.0268644	0.195615	YES
P62324	Protein BTG1	BTG1	32377	27934	24978	19709	19379	32962	28875	28699	20235	20503	32851.5	30360.2	27558.3	19758.7	20181.2	1	0.862773	0.771474	0.608735	0.598542	1.01465	0.937709	0.85117	0.610268	0.623319	0.0146541	0.0749356	0.0796965	0.00153375	0.0247766	0.195596	NO
Q92620	Pre-mRNA-splicing factor ATP-dependent RNA helicase PRP16	DHX38	357200	273040	152000	104740	81101	409460	237720	194190	106620	90475	408087	249947	186472	104110	89054.9	1	0.76439	0.425532	0.293225	0.227046	1.14246	0.69974	0.522037	0.291462	0.249314	0.14246	-0.0646496	0.0965055	-0.0017634	0.0222674	0.19482	NO
O43299	AP-5 complex subunit zeta-1	AP5Z1	156260	129930	106990	74010	60639	165420	112770	111150	106320	65239	164865	118570	106732	103817	64215	1	0.831499	0.684692	0.473634	0.388065	1.05507	0.758802	0.683043	0.664387	0.41095	0.0550699	-0.0726972	-0.00164952	0.190754	0.0228851	0.194362	NO
Q9H299	SH3 domain-binding glutamic acid-rich-like protein 3	SH3BGRL3	219260	210610	205490	175360	181940	237960	207610	197650	191260	206480	237162	218288	189794	186758	203239	1	0.960549	0.937198	0.799781	0.829791	1.08165	0.995569	0.865613	0.851763	0.926932	0.0816471	0.0350199	-0.0715852	0.0519823	0.0971411	0.194205	NO
Q8WUF5	RelA-associated inhibitor	PPP1R13L	16439	14920	14798	11138	10379	15475	14450	16963	13077	11370	15423.1	15193.2	16288.8	12769.2	11191.5	1	0.907598	0.900176	0.677535	0.631364	0.938202	0.924219	0.990863	0.77676	0.680792	-0.0617981	0.0166213	0.0906862	0.0992251	0.0494276	0.194162	NO
Q96B23	Uncharacterized protein C18orf25	C18orf25	44159	36142	37981	31135	28340	47080	37298	41709	30425	30912	46922.1	39216.4	40051.2	29708.8	30426.8	1	0.818452	0.860096	0.705066	0.641772	1.06257	0.888073	0.906978	0.672768	0.689029	0.0625718	0.0696218	0.0468815	-0.0322974	0.0472568	0.194034	NO
P22307	Non-specific lipid-transfer protein	SCP2	159090	146720	136880	114150	107160	157560	148950	148780	119610	123450	157032	156611	142867	116794	121512	1	0.922245	0.860393	0.717518	0.673581	0.987061	0.984419	0.898024	0.73414	0.763796	-0.0129387	0.062174	0.0376303	0.0166216	0.0902154	0.193703	NO
Q9NWV4	UPF0587 protein C1orf123	C1orf123	318550	288500	291670	220520	240250	337930	283910	290140	258300	259110	336797	298513	278608	252219	255043	1	0.905666	0.915618	0.692262	0.754199	1.05728	0.937099	0.874614	0.791774	0.800638	0.0572804	0.0314329	-0.0410041	0.0995118	0.0464388	0.19366	NO
A2RTX5	Probable threonine--tRNA ligase 2, cytoplasmic	TARSL2	5217.6	4591.5	3920.9	2902.4	2645.4	5924.8	4659.9	4183.7	2975.6	2599.4	5904.93	4899.58	4017.42	2905.55	2558.6	1	0.880002	0.751476	0.556271	0.507015	1.13173	0.939049	0.769974	0.556875	0.490379	0.131733	0.0590468	0.018498	0.000604287	-0.0166359	0.193246	NO
Q969F1	General transcription factor 3C polypeptide 6	GTF3C6	13035	10985	8542.9	5921.2	5558.1	13901	10440	10248	7192.1	4942.6	13854.4	10977	9840.68	7022.79	4865.02	1	0.842731	0.655382	0.454254	0.426398	1.06286	0.842116	0.754943	0.538764	0.373228	0.06286	-0.000615034	0.0995615	0.0845105	-0.0531705	0.193146	NO
Q8WUH6	Transmembrane protein 263	TMEM263	275300	249230	266740	185880	189180	259730	235550	262730	229950	239780	258859	247666	252288	224537	236016	1	0.905303	0.968907	0.675191	0.687178	0.940279	0.899621	0.91641	0.815608	0.857307	-0.0597205	-0.00568271	-0.052497	0.140417	0.170129	0.192646	NO
Q9HA64	Ketosamine-3-kinase	FN3KRP	224180	208120	202120	175450	171110	232800	201590	230820	181580	184100	232019	211959	221646	177306	181210	1	0.928361	0.901597	0.78263	0.763271	1.03497	0.945485	0.988696	0.790907	0.808326	0.0349686	0.0171238	0.087099	0.00827691	0.0450549	0.192523	NO
Q08495	Dematin	DMTN	57050	52848	50271	42974	40695	62407	52099	54480	42176	45054	62197.7	54778.7	52314.6	41183.2	44346.8	1	0.926345	0.881174	0.753269	0.713322	1.09023	0.960188	0.916996	0.721878	0.777333	0.0902315	0.0338426	0.035822	-0.0313908	0.0640113	0.192517	NO
Q8NFI3	Cytosolic endo-beta-N-acetylglucosaminidase	ENGASE	13233	10476	8041.3	4847.6	3283.5	15003	10180	9880.6	4366.4	3057.1	14952.7	10703.6	9487.89	4263.61	3009.12	1	0.791657	0.60767	0.366327	0.24813	1.12995	0.808857	0.716987	0.322195	0.227395	0.129954	0.0172002	0.109317	-0.0441311	-0.0207348	0.191605	NO
Q8NEZ2	Vacuolar protein sorting-associated protein 37A	VPS37A	34630	32626	23778	22112	19645	40383	32502	26358	22051	18437	40247.6	34173.7	25310.4	21531.9	18147.6	1	0.942131	0.68663	0.638522	0.567283	1.16222	0.986825	0.73088	0.62177	0.524043	0.162217	0.0446938	0.04425	-0.0167511	-0.0432394	0.19117	NO
P20248	Cyclin-A2	CCNA2	240880	211340	186090	133940	145500	263320	203970	179570	159670	161060	262437	214461	172433	155911	158532	1	0.877366	0.772542	0.556045	0.604035	1.08949	0.890324	0.715845	0.647257	0.658137	0.0894923	0.0129576	-0.056697	0.0912126	0.0541018	0.191067	NO
P52788	Spermine synthase	SMS	954870	842690	845180	624460	591970	985630	818180	873890	733350	654030	982324	860263	839156	716087	643765	1	0.882518	0.885126	0.653974	0.619948	1.02875	0.900922	0.878818	0.749931	0.674191	0.0287521	0.0184038	-0.00630822	0.0959571	0.0542425	0.191047	NO
Q99611	Selenide, water dikinase 2	SEPHS2	86205	79079	78799	61987	66565	90322	78624	76412	70425	75450	90019.1	82668	73374.9	68767.2	74265.8	1	0.917337	0.914089	0.719065	0.772171	1.04424	0.95897	0.851168	0.797717	0.861502	0.0442444	0.0416338	-0.0629205	0.0786516	0.0893308	0.19094	NO
Q5HYJ3	Protein FAM76B	FAM76B	115530	102180	85153	65072	59951	117510	105190	95378	72588	60632	117116	110600	91587.1	70879.2	59680.3	1	0.884446	0.737064	0.563248	0.518921	1.01373	0.957331	0.792756	0.613514	0.516579	0.0137272	0.0728855	0.0556922	0.0502661	-0.00234279	0.190228	NO
Q8IYB7	DIS3-like exonuclease 2	DIS3L2	719540	656650	659610	524200	533530	721980	642950	685430	618580	581400	719559	676020	658187	604018	572275	1	0.912597	0.916711	0.728521	0.741488	1.00003	0.939517	0.914733	0.839451	0.795334	2.5968e-05	0.0269203	-0.00197768	0.11093	0.0538462	0.189744	NO
Q9NX01	Thioredoxin-like protein 4B	TXNL4B	89604	82628	79657	68404	63427	95827	77715	84700	70090	74819	95505.6	81712.3	81333.5	68440	73644.7	1	0.922146	0.888989	0.763403	0.707859	1.06586	0.911927	0.9077	0.763806	0.82189	0.0658634	-0.0102196	0.0187104	0.000402296	0.114031	0.188788	NO
O00232	26S proteasome non-ATPase regulatory subunit 12	PSMD12	951310	820690	838080	613060	607620	1043800	781370	856430	729550	623440	1.0403e+06	821560	822390	712376	613655	1	0.862695	0.880975	0.644438	0.638719	1.09354	0.863609	0.864482	0.748837	0.645063	0.0935441	0.000914411	-0.0164926	0.104399	0.00634353	0.188709	NO
P24534	Elongation factor 1-beta	EEF1B2	690940	650340	626300	468880	475340	694680	648870	661460	525630	527430	692350	682245	635170	513256	519152	1	0.941239	0.906446	0.678612	0.687961	1.00204	0.987415	0.919283	0.742838	0.75137	0.00204105	0.0461758	0.0128371	0.0642261	0.0634087	0.188689	NO
P60510	Serine/threonine-protein phosphatase 4 catalytic subunit	PPP4C	371840	325520	343630	268770	243260	387470	324510	358160	297240	265810	386171	341201	343925	290243	261638	1	0.87543	0.924134	0.722811	0.654206	1.03854	0.917602	0.924926	0.780558	0.70363	0.0385395	0.042172	0.00079232	0.0577475	0.0494243	0.188676	NO
Q15334	Lethal(2) giant larvae protein homolog 1	LLGL1	201360	182130	168640	112740	90441	226230	172510	182760	123050	92167	225471	181383	175496	120153	90720.4	1	0.904499	0.837505	0.559893	0.449151	1.11974	0.90079	0.871554	0.596709	0.450538	0.119742	-0.00370938	0.0340487	0.0368164	0.00138743	0.188285	NO
P35226	Polycomb complex protein BMI-1	BMI1	44326	33085	31059	19396	17944	44282	34261	34725	21956	19520	44133.5	36023.2	33344.8	21439.1	19213.6	1	0.746402	0.700695	0.437576	0.404819	0.995657	0.812688	0.752263	0.48367	0.433462	-0.00434303	0.0662866	0.0515685	0.0460936	0.0286428	0.188248	NO
O95218	Zinc finger Ran-binding domain-containing protein 2	ZRANB2	675180	597900	577830	429840	466100	692370	592300	610650	496440	497360	690048	622765	586379	484754	489554	1	0.885542	0.855816	0.63663	0.690334	1.02202	0.922369	0.868478	0.717962	0.725071	0.0220208	0.0368273	0.0126621	0.0813317	0.0347368	0.187579	NO
Q16644	MAP kinase-activated protein kinase 3	MAPKAPK3	157840	128850	105820	71689	64105	159810	126260	118140	89271	66299	159274	132754	113444	87169.5	65258.4	1	0.816333	0.670426	0.454188	0.406139	1.00909	0.841068	0.71873	0.552265	0.413446	0.00908542	0.0247352	0.0483048	0.0980773	0.00730733	0.18751	YES
Q9NVL1	Protein FAM86C1;Putative protein FAM86C2P;Putative protein N-methyltransferase FAM86B1;Protein-lysine N-methyltransferase EEF2KMT;Putative protein N-methyltransferase FAM86B2	FAM86C1;FAM86C2P;FAM86B1;EEF2KMT;FAM86B2	15082	11162	10365	6017.4	4407.1	15030	12475	10905	6371.2	5151.7	14979.6	13116.7	10471.6	6221.22	5070.84	1	0.740088	0.687243	0.398979	0.292209	0.99321	0.869689	0.694309	0.412493	0.336218	-0.00678997	0.129602	0.00706612	0.013514	0.0440088	0.187401	NO
Q6ZUM4	Rho GTPase-activating protein 27	ARHGAP27	64222	57054	56130	50709	40169	65032	57046	63637	51821	44514	64813.9	59980.2	61107.7	50601.1	43815.3	1	0.888387	0.874	0.789589	0.625471	1.00922	0.933951	0.951507	0.787909	0.682248	0.00921649	0.0455634	0.0775076	-0.00167998	0.0567768	0.187384	NO
Q15631	Translin	TSN	566910	505940	506280	383130	393190	576840	497030	520160	446750	435180	574905	522595	499486	436233	428350	1	0.892452	0.893052	0.675822	0.693567	1.0141	0.92183	0.881067	0.769493	0.755586	0.0141035	0.0293782	-0.0119846	0.0936715	0.0620196	0.187188	NO
P51157	Ras-related protein Rab-28	RAB28	34761	22120	14418	7605.9	7968.8	39747	19584	14370	11811	7966.6	39613.7	20591.3	13798.9	11533	7841.56	1	0.636345	0.414775	0.218806	0.229245	1.1396	0.592368	0.396964	0.331779	0.225585	0.139602	-0.0439773	-0.0178116	0.112973	-0.00366047	0.187126	NO
O95551	Tyrosyl-DNA phosphodiesterase 2	TDP2	199650	176650	168080	120660	113080	213620	176950	175240	136030	117190	212904	186051	168275	132828	115351	1	0.884798	0.841873	0.604358	0.566391	1.06638	0.931888	0.84285	0.665303	0.577764	0.0663841	0.0470897	0.00097637	0.0609456	0.011373	0.186769	NO
P82909	28S ribosomal protein S36, mitochondrial	MRPS36	87376	79684	81313	63081	67957	99737	73860	81119	71937	71650	99402.5	77659	77894.9	70243.6	70525.4	1	0.911967	0.93061	0.721949	0.777754	1.13764	0.888791	0.89149	0.803923	0.807148	0.137641	-0.0231757	-0.03912	0.0819741	0.0293948	0.186714	NO
Q15836	Vesicle-associated membrane protein 3;Vesicle-associated membrane protein 2	VAMP3;VAMP2	59177	53654	43101	31146	25748	70552	45192	47111	35069	26919	70315.4	47516.5	45238.5	34243.5	26496.5	1	0.90667	0.72834	0.526319	0.435101	1.18822	0.802955	0.764461	0.578662	0.44775	0.188222	-0.103715	0.036121	0.0523423	0.0126483	0.185618	NO
Q9BZ23	Pantothenate kinase 2, mitochondrial	PANK2	107170	99530	95875	83256	79748	111790	96610	108860	86940	84374	111415	101579	104533	84893.4	83049.7	1	0.928711	0.894607	0.776859	0.744126	1.03961	0.947832	0.975397	0.792138	0.774934	0.0396108	0.0191206	0.08079	0.0152784	0.030808	0.185608	NO
Q5U5X0	Complex III assembly factor LYRM7	LYRM7	102250	84867	81415	53448	51173	107090	81785	87061	66605	51553	106731	85991.6	83600.7	65037.1	50743.8	1	0.829995	0.796235	0.522719	0.500469	1.04382	0.840994	0.817611	0.63606	0.496272	0.0438225	0.0109988	0.0213759	0.113341	-0.00419718	0.185341	NO
Q9Y315	Deoxyribose-phosphate aldolase	DERA	296440	276280	260380	201360	215700	311170	269850	255170	233220	242080	310126	283730	245028	227730	238280	1	0.931993	0.878356	0.679261	0.727635	1.04617	0.957124	0.826569	0.768216	0.803806	0.0461693	0.0251308	-0.0517877	0.0889552	0.0761718	0.184639	NO
Q6PCE3	Glucose 1,6-bisphosphate synthase	PGM2L1	448180	418950	400680	330120	332820	498300	400070	396970	374500	354870	496629	420648	381192	365684	349300	1	0.934781	0.894016	0.736579	0.742603	1.1081	0.938569	0.850533	0.815931	0.779374	0.108101	0.0037879	-0.0434824	0.0793522	0.0367711	0.18453	NO
P12814	Alpha-actinin-1	ACTN1	1458500	1298100	1318400	1057000	1113400	1555100	1242900	1352700	1198600	1206200	1.54988e+06	1.30683e+06	1.29894e+06	1.17038e+06	1.18727e+06	1	0.890024	0.903942	0.724717	0.763387	1.06266	0.896009	0.890597	0.802458	0.814033	0.0626566	0.00598475	-0.0133454	0.0777404	0.0506464	0.183683	NO
Q9NS18	Glutaredoxin-2, mitochondrial	GLRX2	30347	27567	27906	24212	22869	34350	26470	26468	26593	25412	34234.8	27831.5	25416	25967	25013.1	1	0.908393	0.919564	0.797838	0.753584	1.12811	0.917108	0.837513	0.855669	0.824238	0.128112	0.00871548	-0.0820507	0.0578307	0.0706541	0.183261	NO
Q99717	Mothers against decapentaplegic homolog 5	SMAD5	15527	14289	9726.1	10194	8020.3	18741	14046	11480	8333.4	8121.6	18678.1	14768.5	11023.7	8137.23	7994.13	1	0.920268	0.626399	0.656534	0.516539	1.20295	0.951147	0.709971	0.52407	0.514853	0.202946	0.030879	0.0835717	-0.132464	-0.00168573	0.183247	NO
P84090	Enhancer of rudimentary homolog	ERH	245720	229840	212690	165860	167860	262780	222710	218800	191570	176540	261899	234165	210104	187060	173769	1	0.935374	0.865579	0.674996	0.683135	1.06584	0.952975	0.855053	0.761274	0.707183	0.0658421	0.0176018	-0.0105258	0.0862785	0.024048	0.183245	NO
Q9Y6I3	Epsin-1	EPN1	306100	282530	288210	250950	256710	356240	277780	299030	267040	249430	355045	292068	287145	260754	245515	1	0.922999	0.941555	0.81983	0.838648	1.1599	0.954158	0.938075	0.851858	0.802075	0.1599	0.0311586	-0.00347994	0.0320279	-0.036573	0.183033	NO
Q9NYJ1	Cytochrome c oxidase assembly factor 4 homolog, mitochondrial	COA4	193510	173140	167560	161000	144430	224430	167590	182620	155780	149980	223677	176210	175362	152113	147626	1	0.894734	0.865898	0.831998	0.74637	1.1559	0.910599	0.906215	0.786072	0.762885	0.155895	0.0158649	0.0403163	-0.045926	0.0165157	0.182666	NO
A8MXV4	Nucleoside diphosphate-linked moiety X motif 19, mitochondrial	NUDT19	12422	10693	7867.2	7324.3	5568.2	15083	10420	9777.1	5695	5287.6	15032.4	10956	9388.5	5560.94	5204.61	1	0.860811	0.633328	0.589623	0.448253	1.21014	0.88198	0.755796	0.447668	0.418983	0.210145	0.0211684	0.122468	-0.141955	-0.0292701	0.182556	NO
Q9BSY4	Coiled-coil-helix-coiled-coil-helix domain-containing protein 5	CHCHD5	106890	94018	98714	77522	78546	113480	91379	99672	85795	87890	113099	96079.1	95710.4	83775.3	86510.5	1	0.879577	0.92351	0.72525	0.73483	1.05809	0.89886	0.895411	0.783753	0.809341	0.0580917	0.0192824	-0.0280995	0.0585026	0.0745112	0.182288	NO
P09417	Dihydropteridine reductase	QDPR	465840	418860	436320	366760	362600	475690	418310	439390	397520	417660	474095	439826	421926	388162	411105	1	0.89915	0.936631	0.787309	0.778379	1.01772	0.944156	0.905732	0.833252	0.882502	0.01772	0.0450065	-0.0308989	0.0459432	0.104123	0.181894	NO
P27361	Mitogen-activated protein kinase 3	MAPK3	195080	174920	164660	140030	111960	196350	174060	180390	144190	131340	195691	183013	173220	140796	129279	1	0.896658	0.844064	0.717808	0.573918	1.00313	0.938142	0.887945	0.721733	0.662695	0.0031346	0.0414845	0.0438807	0.00392504	0.0887765	0.181201	YES
Q7Z4V5	Hepatoma-derived growth factor-related protein 2	HDGFRP2	616140	556100	559670	474340	477670	668780	546190	572300	525380	500010	666537	574283	549553	513012	492162	1	0.902555	0.908349	0.769857	0.775262	1.08179	0.932066	0.891929	0.832623	0.798783	0.0817949	0.0295117	-0.0164193	0.0627654	0.0235206	0.181173	NO
Q8WU58	Protein FAM222B	FAM222B	21775	18861	18153	15650	13973	21148	20763	19241	16228	15364	21077.1	21830.9	18476.2	15846	15122.9	1	0.866177	0.833662	0.718714	0.641699	0.967948	1.00257	0.848507	0.727715	0.694505	-0.0320516	0.136393	0.014845	0.00900046	0.052806	0.180992	NO
P63208	S-phase kinase-associated protein 1	SKP1	611920	515400	541950	401320	414040	638620	520200	544010	465620	441630	636478	546957	522388	454659	434698	1	0.842267	0.885655	0.655837	0.676624	1.04013	0.893837	0.853687	0.743004	0.710384	0.0401331	0.0515698	-0.0319685	0.0871668	0.0337598	0.180661	NO
O00193	Small acidic protein	SMAP	253240	225590	234830	202870	204520	264020	225000	240090	219440	225660	263135	236573	230547	214274	222118	1	0.890815	0.927302	0.801098	0.807613	1.03907	0.934185	0.910391	0.846131	0.877105	0.0390718	0.0433696	-0.0169112	0.0450335	0.0694918	0.180056	NO
Q9UIV1	CCR4-NOT transcription complex subunit 7	CNOT7	54621	47244	44157	37277	34373	55387	49101	50754	37675	35706	55201.2	51626.5	48736.7	36788.1	35145.6	1	0.864942	0.808425	0.682466	0.6293	1.01062	0.945177	0.892271	0.673516	0.643444	0.0106232	0.080235	0.0838457	-0.00895055	0.0141442	0.179898	NO
P63241	Eukaryotic translation initiation factor 5A-1;Eukaryotic translation initiation factor 5A-1-like	EIF5A;EIF5AL1	970740	882110	804830	562310	472100	1157900	840220	825320	625500	432550	1.15402e+06	883437	792517	610775	425761	1	0.908699	0.829089	0.579259	0.48633	1.1888	0.910065	0.816405	0.629185	0.438594	0.188801	0.00136684	-0.0126842	0.0499263	-0.0477359	0.179674	NO
Q9BUR4	Telomerase Cajal body protein 1	WRAP53	111580	108500	101610	87986	83827	127390	105730	107440	88939	86758	126963	111168	103170	86845.3	85396.3	1	0.972396	0.910647	0.788546	0.751273	1.13786	0.99631	0.924625	0.778323	0.765337	0.137863	0.0239132	0.0139783	-0.0102229	0.0140641	0.179596	NO
Q14562	ATP-dependent RNA helicase DHX8	DHX8	13396	10821	11876	9463.2	7589.2	15248	10868	12559	9501.8	7700.8	15196.9	11427	12059.8	9278.12	7579.93	1	0.807778	0.886533	0.70642	0.566527	1.13443	0.853016	0.900256	0.692604	0.565835	0.134433	0.0452372	0.0137229	-0.0138158	-0.000691966	0.178885	NO
P29218	Inositol monophosphatase 1	IMPA1	482400	457880	450870	379980	356110	480040	453920	473480	404690	414310	478430	477267	454661	395163	407807	1	0.949171	0.934639	0.787687	0.738205	0.99177	0.98936	0.942498	0.819161	0.845371	-0.00822951	0.0401896	0.00785888	0.0314747	0.107166	0.17846	NO
P63146	Ubiquitin-conjugating enzyme E2 B	UBE2B	59726	50101	52071	37203	41226	61138	47912	53306	47235	43021	60933	50376.4	51187.3	46123.1	42345.8	1	0.838847	0.871831	0.622895	0.690252	1.02021	0.843458	0.857036	0.772244	0.709	0.0202083	0.00461041	-0.0147958	0.14935	0.0187482	0.178121	NO
P55209	Nucleosome assembly protein 1-like 1	NAP1L1	557650	486700	465890	290530	278500	619240	484540	476190	355800	251220	617163	509462	457263	347424	247277	1	0.87277	0.835452	0.52099	0.499417	1.10672	0.913588	0.819983	0.623015	0.443427	0.106722	0.0408184	-0.0154695	0.102025	-0.0559905	0.178105	NO
Q8ND76	Cyclin-Y	CCNY	34116	32072	30474	27363	25832	37044	30608	33223	29774	26265	36919.8	32182.3	31902.5	29073.1	25852.8	1	0.940087	0.893247	0.802058	0.757181	1.08218	0.943321	0.935119	0.852184	0.75779	0.0821833	0.00323389	0.0418725	0.0501262	0.000608278	0.178024	NO
Q9UHP3	Ubiquitin carboxyl-terminal hydrolase 25	USP25	590870	523140	463390	276670	234100	638200	501800	503660	324820	232250	636060	527610	483642	317174	228605	1	0.885372	0.78425	0.468242	0.396195	1.07648	0.892938	0.818525	0.536791	0.386895	0.0764799	0.00756539	0.0342742	0.0685491	-0.0093004	0.177568	NO
O43396	Thioredoxin-like protein 1	TXNL1	441240	378220	379510	287540	301890	469300	383630	387940	311570	323950	467726	403362	372521	304235	318865	1	0.857175	0.860099	0.651663	0.684185	1.06003	0.914156	0.844259	0.689501	0.722657	0.0600265	0.0569805	-0.0158395	0.0378377	0.038472	0.177477	NO
Q92625	Ankyrin repeat and SAM domain-containing protein 1A	ANKS1A	164860	134760	127480	96424	90159	183020	130420	129830	110330	92399	182406	137128	124670	107733	90948.7	1	0.817421	0.773262	0.584884	0.546882	1.10643	0.831786	0.756216	0.65348	0.551673	0.106431	0.0143648	-0.017046	0.0685963	0.00479032	0.177136	NO
Q9Y4F3	Meiosis arrest female protein 1	KIAA0430	19455	18336	16373	12096	11594	21803	15880	16836	14491	12753	21729.9	16696.8	16166.8	14149.9	12552.8	1	0.942483	0.841583	0.621742	0.595939	1.11693	0.858226	0.830986	0.727313	0.645224	0.11693	-0.0842565	-0.0105968	0.105571	0.0492846	0.176932	NO
Q96EK6	Glucosamine 6-phosphate N-acetyltransferase	GNPNAT1	326890	279160	294030	241240	242920	358380	257800	294510	275060	266590	357178	271060	282804	268585	262406	1	0.853988	0.899477	0.737985	0.743125	1.09266	0.829209	0.865136	0.821637	0.802734	0.0926553	-0.024779	-0.0343405	0.0836519	0.0596093	0.176797	NO
Q86WP2	Vasculin	GPBP1	18892	16280	13247	10000	9480.7	21193	14519	16052	10999	8826.9	21121.9	15265.8	15414	10740.1	8688.36	1	0.86174	0.701196	0.529325	0.501837	1.11804	0.808056	0.815901	0.568499	0.459896	0.118035	-0.0536848	0.114705	0.0391742	-0.0419407	0.176289	NO
P04075	Fructose-bisphosphate aldolase A	ALDOA	4722500	4401700	4287300	3708300	3726400	5202100	4213100	4331600	3975400	4086400	5.18465e+06	4.4298e+06	4.15944e+06	3.88182e+06	4.02226e+06	1	0.93207	0.907845	0.785241	0.789074	1.09786	0.93802	0.88077	0.821984	0.851723	0.0978621	0.00595055	-0.0270753	0.0367426	0.0626492	0.176129	NO
Q9UEE9	Craniofacial development protein 1	CFDP1	284970	253110	255520	196270	208640	283730	255830	273320	225210	217860	282778	268989	262457	219908	214441	1	0.888199	0.896656	0.688739	0.732147	0.99231	0.943919	0.920997	0.77169	0.752502	-0.00769046	0.0557204	0.0243417	0.0829507	0.0203549	0.175677	NO
P54105	Methylosome subunit pICln	CLNS1A	330640	300860	291160	237950	221200	379710	292880	296090	254790	223830	378437	307944	284322	248792	220317	1	0.909932	0.880595	0.719665	0.669006	1.14456	0.931358	0.859913	0.752456	0.666334	0.144558	0.0214261	-0.0206822	0.0327913	-0.0026711	0.175422	NO
Q9Y6R4	Mitogen-activated protein kinase kinase kinase 4	MAP3K4	267290	207560	158380	93674	73040	291900	202170	171520	105070	77230	290921	212569	164703	102597	76017.8	1	0.776535	0.59254	0.350458	0.273261	1.08841	0.795273	0.616195	0.38384	0.284402	0.0884098	0.0187386	0.0236552	0.0333817	0.0111408	0.175326	YES
Q58FG1	Putative heat shock protein HSP 90-alpha A4	HSP90AA4P	31308	30383	26754	21708	18414	28188	28793	33723	23272	20910	28093.5	30274	32382.6	22724.2	20581.8	1	0.970455	0.854542	0.693369	0.588156	0.897325	0.966972	1.03433	0.725826	0.657398	-0.102675	-0.00348242	0.179783	0.0324571	0.0692412	0.175324	NO
Q9H7L9	Sin3 histone deacetylase corepressor complex component SDS3	SUDS3	109570	96299	98102	81284	78145	122010	92690	106740	94213	70151	121601	97457.5	102498	91995.2	69049.9	1	0.878881	0.895336	0.741845	0.713197	1.1098	0.889454	0.935452	0.839602	0.63019	0.1098	0.0105734	0.0401161	0.0977565	-0.0830069	0.175239	NO
Q9NXE8	Pre-mRNA-splicing factor CWC25 homolog	CWC25	37748	35507	33699	28501	29614	41643	36682	33827	30860	29454	41503.3	38568.7	32482.5	30133.5	28991.7	1	0.940633	0.892736	0.755033	0.784518	1.09948	1.02174	0.86051	0.798282	0.768033	0.0994845	0.0811101	-0.0322264	0.0432484	-0.0164857	0.175131	NO
Q96B26	Exosome complex component RRP43	EXOSC8	415070	369880	351910	215900	191160	433590	366120	367450	262000	193770	432136	384951	352845	255832	190729	1	0.891127	0.847833	0.520153	0.460549	1.04112	0.927437	0.850086	0.61636	0.45951	0.0411156	0.0363106	0.00225354	0.0962064	-0.00103924	0.174847	NO
Q8N1G0	Zinc finger protein 687	ZNF687	19187	15358	14145	10571	10288	22092	14821	13217	12419	10651	22017.9	15583.3	12691.7	12126.7	10483.8	1	0.800438	0.737218	0.550946	0.536196	1.14754	0.812181	0.661473	0.632024	0.546403	0.147543	0.0117434	-0.0757451	0.0810784	0.0102061	0.174826	NO
Q96FS4	Signal-induced proliferation-associated protein 1	SIPA1	84925	70983	69857	53808	53754	89565	67730	78491	60093	54477	89264.6	71213.7	75371.3	58678.4	53621.9	1	0.835832	0.822573	0.633594	0.632958	1.0511	0.838548	0.887504	0.690944	0.631404	0.0510995	0.00271655	0.0649315	0.0573492	-0.00155497	0.174542	NO
Q5TAX3	Terminal uridylyltransferase 4	ZCCHC11	417000	353360	354560	270160	213460	428620	351760	380960	301590	227520	427183	369853	365818	294490	223949	1	0.847386	0.850264	0.647866	0.511894	1.02442	0.886937	0.877262	0.706212	0.537048	0.0244185	0.0395512	0.0269986	0.0583463	0.0251533	0.174468	NO
O75380	NADH dehydrogenase [ubiquinone] iron-sulfur protein 6, mitochondrial	NDUFS6	42293	41339	40022	30201	28066	45471	43798	37969	31064	31621	45318.5	46050.8	36459.9	30332.7	31124.7	1	0.977443	0.946303	0.71409	0.663609	1.07154	1.08885	0.862079	0.717205	0.73593	0.0715367	0.111407	-0.0842246	0.0031149	0.0723213	0.174156	NO
Q5PRF9	Protein Smaug homolog 2	SAMD4B	70907	69299	64515	52048	47141	75164	67801	69217	53377	52269	74911.9	71288.4	66465.9	52120.5	51448.6	1	0.977322	0.909854	0.734032	0.664829	1.05648	1.00538	0.937367	0.735054	0.725579	0.0564813	0.0280558	0.0275136	0.00102218	0.06075	0.173823	NO
O43617	Trafficking protein particle complex subunit 3	TRAPPC3	376350	317060	284390	198960	188470	371210	312810	315890	231580	205500	369965	328899	303335	226128	202275	1	0.84246	0.755653	0.528657	0.500784	0.983035	0.873919	0.805991	0.600846	0.537464	-0.0169654	0.0314586	0.0503379	0.0721894	0.03668	0.173701	NO
Q8N4T0	Carboxypeptidase A6	CPA6	18635	16791	16768	12984	12367	18459	16552	18744	14521	13006	18397.1	17403.4	17999	14179.2	12801.9	1	0.901046	0.899812	0.696753	0.663644	0.987233	0.933907	0.965871	0.760889	0.686979	-0.0127666	0.0328605	0.0660587	0.0641357	0.0233357	0.173624	NO
O75157	TSC22 domain family protein 2	TSC22D2	166900	141300	138330	107160	95663	173070	138930	150880	115590	103470	172490	146076	144883	112869	101846	1	0.846615	0.82882	0.642061	0.573176	1.03349	0.87523	0.868084	0.676267	0.610221	0.0334905	0.0286153	0.0392639	0.0342058	0.0370459	0.172621	NO
P39748	Flap endonuclease 1	FEN1	596280	550860	534370	423710	431890	620840	543540	540430	473090	476350	618758	571497	518950	461953	468873	1	0.923828	0.896173	0.710589	0.724307	1.0377	0.958437	0.870313	0.774725	0.786331	0.0376969	0.0346097	-0.0258601	0.0641364	0.0620235	0.172606	NO
O15169	Axin-1	AXIN1	31045	28391	27677	25142	22802	37396	26567	27876	26060	23359	37270.6	27933.5	26768	25446.5	22992.4	1	0.914511	0.891512	0.809857	0.734482	1.20053	0.899774	0.862234	0.819666	0.740614	0.200534	-0.0147374	-0.0292787	0.00980947	0.00613187	0.172459	NO
Q765P7	MTSS1-like protein	MTSS1L	135660	129600	126960	106570	100770	133280	129580	135230	110880	117550	132833	136245	129855	108270	115705	1	0.95533	0.935869	0.785567	0.742813	0.979161	1.00431	0.95721	0.798097	0.852904	-0.0208387	0.0489825	0.0213413	0.0125301	0.110091	0.172106	NO
Q8N9N7	Leucine-rich repeat-containing protein 57	LRRC57	176780	158620	163500	124590	120960	167310	163650	174500	142040	131850	166749	172067	167564	138696	129781	1	0.897273	0.924878	0.704774	0.68424	0.943257	0.973342	0.947869	0.78457	0.734136	-0.0567435	0.0760684	0.022991	0.0797958	0.0498955	0.172007	NO
Q9NQ48	Leucine zipper transcription factor-like protein 1	LZTFL1	336550	318750	300360	231610	220320	342450	316060	316530	265340	232460	341302	332317	303949	259094	228811	1	0.94711	0.892468	0.688189	0.654643	1.01412	0.987421	0.903132	0.769852	0.679873	0.0141183	0.0403108	0.0106648	0.0816633	0.0252306	0.171988	NO
Q6IQ49	Protein SDE2 homolog	SDE2	37393	34675	36284	26978	28283	40913	34296	35486	30752	29543	40775.8	36060	34075.6	30028.1	29079.3	1	0.927313	0.970342	0.721472	0.756372	1.09047	0.964352	0.911282	0.80304	0.777667	0.0904658	0.0370396	-0.0590598	0.0815683	0.0212955	0.171309	NO
Q04837	Single-stranded DNA-binding protein, mitochondrial	SSBP1	278730	243870	249240	175590	189260	267820	246700	248380	210390	217360	266922	259389	238508	205437	213948	1	0.874933	0.894199	0.629964	0.679008	0.957636	0.93061	0.855695	0.737048	0.767583	-0.0423643	0.0556777	-0.0385035	0.107083	0.0885745	0.170468	NO
P34949	Mannose-6-phosphate isomerase	MPI	359200	314930	322470	250750	231810	376960	310070	332830	288060	241560	375696	326018	319601	281279	237769	1	0.876754	0.897745	0.698079	0.645351	1.04592	0.907624	0.889759	0.783071	0.661939	0.0459237	0.03087	-0.00798614	0.0849914	0.0165884	0.170387	NO
Q12974	Protein tyrosine phosphatase type IVA 2	PTP4A2	184310	179170	165590	129670	140050	204200	174110	156850	147010	151790	203515	183065	150616	143549	149408	1	0.972112	0.898432	0.703543	0.759861	1.1042	0.993247	0.817188	0.778847	0.810632	0.1042	0.0211349	-0.0812443	0.0753042	0.0507707	0.170166	NO
Q9H0S4	Probable ATP-dependent RNA helicase DDX47	DDX47	35030	28768	25779	22602	20777	37132	29236	30394	23576	19249	37007.5	30739.8	29186	23021	18946.9	1	0.821239	0.735912	0.645218	0.59312	1.05645	0.877527	0.833171	0.65718	0.540876	0.0564508	0.0562877	0.0972585	0.0119614	-0.0522446	0.169714	NO
O76041	Nebulette	NEBL	49750	43161	43676	36583	34396	52989	46426	43835	40328	33432	52811.3	48813.9	42092.7	39378.7	32907.3	1	0.867558	0.87791	0.735337	0.691377	1.06153	0.981184	0.846085	0.791531	0.661452	0.0615335	0.113627	-0.0318243	0.0561942	-0.0299244	0.169606	NO
Q96HY6	DDRGK domain-containing protein 1	DDRGK1	36592	34954	24728	15993	14625	36118	34938	27890	18070	16191	35996.9	36735	26781.5	17644.6	15936.9	1	0.955236	0.675776	0.437063	0.399678	0.983736	1.00391	0.731895	0.482199	0.435529	-0.0162639	0.048673	0.0561185	0.0451362	0.0358513	0.169515	NO
Q14653	Interferon regulatory factor 3	IRF3	240560	220800	220530	169310	167060	252670	212520	218630	197250	184000	251823	223451	209940	192607	181112	1	0.917858	0.916736	0.703816	0.694463	1.04682	0.928878	0.872715	0.800659	0.752877	0.0468183	0.0110201	-0.0440208	0.0968434	0.0584137	0.169075	NO
Q9P1U1	Actin-related protein 3B	ACTR3B	51505	47269	48686	44592	38282	61959	46618	47444	43852	40531	61751.2	49015.8	45558.3	42819.7	39894.8	1	0.917756	0.945267	0.86578	0.743268	1.19894	0.951671	0.884541	0.83137	0.774582	0.198936	0.0339152	-0.0607262	-0.0344102	0.0313142	0.169029	NO
P41743	Protein kinase C iota type	PRKCI	296480	223460	185230	134420	107280	318560	209410	206150	156910	109800	317492	220181	197956	153216	108077	1	0.75371	0.624764	0.453386	0.361846	1.07087	0.742651	0.667689	0.516784	0.364533	0.0708703	-0.0110596	0.0429249	0.0633981	0.00268689	0.168821	YES
A6NKD9	Coiled-coil domain-containing protein 85C	CCDC85C	51615	42642	35406	25222	21660	61292	41073	36060	26487	20821	61086.4	43185.6	34626.8	25863.5	20494.2	1	0.826155	0.685963	0.488656	0.419645	1.1835	0.836687	0.670866	0.501085	0.397059	0.183502	0.0105317	-0.0150971	0.0124282	-0.0225865	0.168778	NO
P06733	Alpha-enolase	ENO1	7681600	6946800	7000200	5708400	6097100	8563300	6331300	7032900	6415700	6624300	8.53458e+06	6.65695e+06	6.75337e+06	6.26467e+06	6.52033e+06	1	0.904343	0.911295	0.743126	0.793728	1.11104	0.86661	0.879162	0.815543	0.848824	0.111042	-0.0377328	-0.0321325	0.0724161	0.0550962	0.168689	NO
P52907	F-actin-capping protein subunit alpha-1	CAPZA1	884860	761210	800610	634570	661880	948500	738430	830190	735800	665090	945319	776411	797193	718479	654651	1	0.86026	0.904787	0.717142	0.748005	1.06833	0.87744	0.900926	0.811969	0.739836	0.0683261	0.0171793	-0.00386121	0.0948273	-0.00816973	0.168302	NO
Q13049	E3 ubiquitin-protein ligase TRIM32	TRIM32	92982	77630	69658	53429	44109	95949	75888	79624	56863	46780	95627.2	79791.3	76459.3	55524.4	46045.8	1	0.834893	0.749156	0.574617	0.474382	1.02845	0.858137	0.822302	0.597152	0.495211	0.0284487	0.0232444	0.0731461	0.0225357	0.0208293	0.168204	NO
P08670	Vimentin	VIM	3080600	2882100	2830300	1929100	1232500	3537900	2831700	2875200	2095700	1180100	3.52603e+06	2.97735e+06	2.76092e+06	2.04637e+06	1.16158e+06	1	0.935565	0.91875	0.626209	0.400084	1.14459	0.966483	0.896229	0.664275	0.377062	0.144594	0.030919	-0.0225207	0.038066	-0.0230223	0.168036	NO
P62312	U6 snRNA-associated Sm-like protein LSm6	LSM6	330010	307780	304550	239810	255050	320610	312830	296450	278980	291480	319535	328920	284667	272413	286905	1	0.932638	0.922851	0.726675	0.772855	0.968258	0.996698	0.862602	0.825468	0.869383	-0.0317422	0.0640601	-0.0602487	0.098793	0.0965274	0.16739	NO
Q14247	Src substrate cortactin	CTTN	1228800	1149500	1121700	886150	902130	1315500	1165100	1109400	930620	998130	1.31109e+06	1.22503e+06	1.06531e+06	908713	982464	1	0.935465	0.912842	0.721151	0.734155	1.06697	0.99693	0.866948	0.739512	0.799531	0.0669663	0.0614641	-0.0458936	0.0183616	0.0653757	0.166274	NO
O94817	Ubiquitin-like protein ATG12	ATG12	100560	94251	87857	66587	64359	101850	91371	94636	76691	68012	101508	96070.7	90874.6	74885.7	66944.5	1	0.937261	0.873677	0.662162	0.640006	1.00943	0.955357	0.903685	0.744686	0.665717	0.00943143	0.0180955	0.030008	0.0825244	0.025711	0.16577	NO
Q99439	Calponin-2	CNN2	473260	417250	421280	331440	340540	459080	417530	429210	392380	376200	457540	439006	412151	383143	370295	1	0.881651	0.890166	0.700334	0.719562	0.966784	0.927621	0.870876	0.809583	0.782435	-0.0332156	0.0459699	-0.0192903	0.109249	0.062873	0.165586	NO
Q9Y496	Kinesin-like protein KIF3A	KIF3A	93058	80691	50564	35740	24428	97554	87271	59912	35643	18845	97226.8	91759.8	57530.7	34803.9	18549.2	1	0.867104	0.54336	0.384062	0.262503	1.0448	0.98605	0.618225	0.374003	0.19933	0.0447982	0.118945	0.0748645	-0.0100588	-0.0631734	0.165376	NO
Q15554	Telomeric repeat-binding factor 2	TERF2	63206	57787	50783	38820	37466	65201	55448	54471	41696	42884	64982.3	58300	52306	40714.5	42210.9	1	0.914264	0.803452	0.614182	0.59276	1.0281	0.92238	0.827548	0.644155	0.667831	0.0281039	0.00811595	0.0240958	0.0299727	0.0750705	0.165359	NO
Q9H999	Pantothenate kinase 3	PANK3	8354.8	7877.6	7809.8	7128.1	6891.3	9512.7	8240.7	7862.4	7269.2	6755.5	9480.8	8664.56	7549.9	7098.08	6649.47	1	0.942883	0.934768	0.853174	0.824831	1.13477	1.03708	0.90366	0.849581	0.795886	0.134772	0.0941928	-0.0311076	-0.0035932	-0.0289453	0.165319	NO
Q9NSA3	Beta-catenin-interacting protein 1	CTNNBIP1	53866	50802	43223	38715	35564	57570	50947	47171	38258	38073	57376.9	53567.5	45296.1	37357.4	37475.4	1	0.943118	0.802417	0.718728	0.660231	1.06518	0.994458	0.840904	0.693524	0.695716	0.0651789	0.0513397	0.0384871	-0.0252035	0.0354847	0.165287	NO
Q16774	Guanylate kinase	GUK1	301110	267130	207020	106360	85206	295940	269440	241180	124060	86898	294948	283299	231594	121140	85534.1	1	0.887151	0.687523	0.353226	0.282973	0.979534	0.940848	0.769134	0.40231	0.284063	-0.0204659	0.0536969	0.0816117	0.0490836	0.00108955	0.165016	NO
Q9P219	Protein Daple	CCDC88C	144250	135390	101550	68599	61211	154810	136220	117150	65582	61712	154291	143226	112494	64038.2	60743.4	1	0.938579	0.703986	0.475556	0.42434	1.06961	0.992905	0.779853	0.443939	0.421098	0.069607	0.0543258	0.0758667	-0.0316176	-0.00324169	0.16494	NO
Q9H2C0	Gigaxonin	GAN	464640	432930	423630	304470	250000	494340	419840	437310	338710	271710	492682	441435	419929	330737	267445	1	0.931754	0.911738	0.655282	0.538051	1.06035	0.950057	0.903772	0.711813	0.575597	0.0603524	0.0183035	-0.00796589	0.0565311	0.0375459	0.164767	NO
Q92667	A-kinase anchor protein 1, mitochondrial	AKAP1	204380	186410	170620	137850	124640	213290	182710	184680	140700	140350	212575	192108	177340	137388	138147	1	0.912076	0.834817	0.674479	0.609844	1.0401	0.939954	0.867696	0.672218	0.675933	0.0400953	0.0278781	0.0328786	-0.00226121	0.0660882	0.164679	NO
Q9Y294	Histone chaperone ASF1A	ASF1A	139430	120680	124820	97292	90696	145870	124770	132170	108000	88273	145381	131188	126917	105458	86887.5	1	0.865524	0.895216	0.697784	0.650477	1.04268	0.940885	0.910255	0.756348	0.623162	0.0426794	0.0753609	0.0150383	0.0585644	-0.0273148	0.164328	NO
Q15208	Serine/threonine-protein kinase 38	STK38	191340	159890	123150	79567	69859	189260	158770	137690	99148	71699	188625	166936	132217	96814	70573.6	1	0.835633	0.643619	0.415841	0.365104	0.985812	0.872459	0.691008	0.505979	0.368839	-0.014188	0.0368264	0.0473889	0.090138	0.00373488	0.1639	YES
P04083	Annexin A1	ANXA1	2709600	2507200	2483800	2021600	2197100	2870400	2477800	2435600	2274200	2375200	2.86077e+06	2.60525e+06	2.33879e+06	2.22066e+06	2.33792e+06	1	0.925303	0.916667	0.746088	0.810858	1.05579	0.961487	0.863151	0.819554	0.862828	0.0557918	0.0361847	-0.0535153	0.0734663	0.0519706	0.163898	NO
Q96DC8	Enoyl-CoA hydratase domain-containing protein 3, mitochondrial	ECHDC3	43590	38162	37942	32708	35903	51657	35443	38628	36689	34310	51483.8	37266	37092.7	35825.3	33771.5	1	0.875476	0.870429	0.750356	0.823652	1.18109	0.854921	0.850945	0.82187	0.774753	0.181091	-0.0205548	-0.0194839	0.0715146	-0.0488993	0.163668	NO
P48454	Serine/threonine-protein phosphatase 2B catalytic subunit gamma isoform	PPP3CC	113250	95382	101930	89934	79659	132970	89943	102280	95973	80933	132524	94569.2	98214.8	93713.7	79662.7	1	0.842225	0.900044	0.794119	0.703391	1.17019	0.835048	0.867239	0.827494	0.703423	0.17019	-0.00717676	-0.0328054	0.0333753	3.26588e-05	0.163616	NO
Q9NRD5	PRKCA-binding protein	PICK1	18886	17859	15853	9289.3	7161.2	23990	16096	14929	10129	7188.6	23909.5	16923.9	14335.6	9890.56	7075.77	1	0.945621	0.839405	0.491862	0.37918	1.26599	0.896108	0.759061	0.523698	0.374657	0.265993	-0.0495129	-0.0803434	0.0318362	-0.00452347	0.163449	NO
Q13615	Myotubularin-related protein 3	MTMR3	21605	19198	16800	16003	13146	22351	18258	21072	15220	13926	22276	19197.1	20234.5	14861.7	13707.4	1	0.888591	0.777598	0.740708	0.60847	1.03106	0.888549	0.936564	0.687883	0.634456	0.0310595	-4.15142e-05	0.158967	-0.0528251	0.0259857	0.163145	NO
Q9Y651	Transcription factor SOX-21	SOX21	24873	23738	22098	19187	18539	24289	23837	23362	20170	21426	24207.5	25063.1	22433.5	19695.2	21089.7	1	0.954368	0.888433	0.771399	0.745346	0.973246	1.00764	0.90192	0.79183	0.847895	-0.0267542	0.053273	0.0134868	0.0204313	0.102549	0.162986	NO
P26885	Peptidyl-prolyl cis-trans isomerase FKBP2	FKBP2	269620	234560	228220	173940	175570	277140	223310	233230	210920	187750	276211	234796	223960	205955	184803	1	0.869965	0.846451	0.64513	0.651176	1.02444	0.87084	0.830651	0.763871	0.685421	0.0244439	0.00087525	-0.0157998	0.118741	0.034245	0.162505	NO
Q8NG31	Protein CASC5	CASC5	470690	414630	357810	250460	222270	483800	410300	391450	282050	230720	482177	431404	375891	275410	227099	1	0.880898	0.760182	0.532112	0.472222	1.02441	0.916535	0.798597	0.585121	0.48248	0.0244056	0.0356367	0.0384148	0.0530081	0.0102587	0.161724	NO
O14773	Tripeptidyl-peptidase 1	TPP1	215350	192220	193740	155640	147110	241110	180840	191590	170900	160100	240301	190142	183975	166877	157587	1	0.892593	0.899652	0.72273	0.683121	1.11586	0.882942	0.854307	0.77491	0.731772	0.115864	-0.00965157	-0.0453444	0.0521799	0.0486516	0.1617	NO
P62306	Small nuclear ribonucleoprotein F	SNRPF	63642	50626	51073	45391	43676	74284	48678	57034	46347	40083	74034.9	51181.8	54767.1	45256	39453.9	1	0.795481	0.802505	0.713224	0.686276	1.1633	0.804214	0.86055	0.711102	0.619934	0.163302	0.00873261	0.0580455	-0.00212173	-0.0663419	0.161617	NO
Q8NC56	LEM domain-containing protein 2	LEMD2	65448	54863	56853	49771	41770	71728	53248	60283	50728	45093	71487.4	55986.8	57887	49533.8	44385.2	1	0.838269	0.868674	0.760466	0.638217	1.09228	0.85544	0.884473	0.756843	0.678176	0.0922785	0.0171712	0.0157988	-0.00362367	0.0399589	0.161584	NO
P31943	Heterogeneous nuclear ribonucleoprotein H;Heterogeneous nuclear ribonucleoprotein H, N-terminally processed	HNRNPH1	848890	773270	750870	576580	526300	942470	780620	753140	627790	524940	939309	820771	723206	613012	516701	1	0.910919	0.884532	0.679216	0.619986	1.10651	0.966876	0.851943	0.722133	0.608678	0.106515	0.055957	-0.0325887	0.0429167	-0.0113081	0.161492	NO
Q8N142	Adenylosuccinate synthetase isozyme 1	ADSSL1	152890	154830	145120	109930	103980	152760	152520	155200	124390	110050	152248	160365	149031	121462	108323	1	1.01269	0.949179	0.719014	0.680097	0.995799	1.04889	0.974763	0.794439	0.708501	-0.00420115	0.0362018	0.0255834	0.0754255	0.028404	0.161413	NO
A0AV96	RNA-binding protein 47	RBM47	10540	9578.5	8416.7	5954	5469.1	11526	9383.7	9536.1	6490.8	4887.2	11487.3	9866.35	9157.08	6338	4810.49	1	0.908776	0.798548	0.564896	0.51889	1.08988	0.936087	0.868793	0.601329	0.456403	0.0898809	0.0273104	0.0702447	0.036433	-0.0624865	0.161383	NO
Q9NUX5	Protection of telomeres protein 1	POT1	69257	67383	55133	40198	33976	74441	61865	62233	42761	36938	74191.3	65047	59759.5	41754.4	36358.2	1	0.972941	0.796064	0.580418	0.490579	1.07125	0.939212	0.862866	0.60289	0.524976	0.0712469	-0.0337289	0.0668018	0.0224726	0.034397	0.161189	NO
Q8N3X1	Formin-binding protein 4	FNBP4	279830	271270	254370	236100	204160	298720	256760	281030	240770	221660	297718	269966	269860	235102	218181	1	0.96941	0.909016	0.843727	0.729586	1.06393	0.964752	0.964372	0.840161	0.779691	0.0639252	-0.00465822	0.0553558	-0.00356589	0.050105	0.161162	NO
P09651	Heterogeneous nuclear ribonucleoprotein A1;Heterogeneous nuclear ribonucleoprotein A1, N-terminally processed;Heterogeneous nuclear ribonucleoprotein A1-like 2	HNRNPA1;HNRNPA1L2	965430	901730	866820	589550	419960	1146100	875190	840270	660360	390990	1.14226e+06	920206	806873	644815	384853	1	0.934019	0.897859	0.610661	0.434998	1.18316	0.953156	0.835765	0.667904	0.398634	0.183158	0.0191371	-0.0620939	0.0572437	-0.036364	0.161081	NO
Q9P0J7	E3 ubiquitin-protein ligase KCMF1	KCMF1	68396	62288	50345	35065	34061	69859	64131	52144	41818	33739	69624.7	67429.6	50071.5	40833.6	33209.4	1	0.910697	0.736081	0.512676	0.497997	1.01796	0.98587	0.732082	0.597017	0.485547	0.0179647	0.0751738	-0.0039989	0.084341	-0.0124504	0.16103	NO
P31937	3-hydroxyisobutyrate dehydrogenase, mitochondrial	HIBADH	268670	234820	240880	179450	177740	276390	229770	245300	204530	195560	275463	241588	235550	199715	192491	1	0.874009	0.896565	0.66792	0.661555	1.02528	0.899201	0.876727	0.743348	0.716457	0.0252841	0.0251917	-0.0198372	0.0754281	0.0549021	0.160969	NO
P84022	Mothers against decapentaplegic homolog 3	SMAD3	140100	124910	88394	50051	45387	134340	115280	100180	76351	46235	133889	121209	96198.3	74553.7	45509.3	1	0.891577	0.630935	0.357252	0.323961	0.955671	0.865164	0.68664	0.532146	0.324834	-0.0443293	-0.0264137	0.0557049	0.174894	0.000873009	0.160729	NO
Q07960	Rho GTPase-activating protein 1	ARHGAP1	311480	273490	218500	123660	76779	325400	253740	248050	147170	82211	324309	266791	238191	143706	80920.6	1	0.878034	0.70149	0.397008	0.246497	1.04119	0.856527	0.764707	0.461364	0.259794	0.0411863	-0.0215065	0.0632177	0.0643558	0.0132966	0.16055	NO
Q9Y2Q3	Glutathione S-transferase kappa 1	GSTK1	388190	321080	329450	251870	250250	393960	317270	350680	281820	269140	392639	333589	336742	275186	264916	1	0.827121	0.848682	0.648832	0.644659	1.01146	0.859344	0.867467	0.708895	0.682438	0.0114603	0.0322235	0.0187844	0.0600629	0.0377796	0.160311	NO
O94874	E3 UFM1-protein ligase 1	UFL1	114220	99063	86711	59592	52008	128540	101170	93270	60166	47849	128109	106374	89562.9	58749.7	47098	1	0.8673	0.759158	0.52173	0.455332	1.1216	0.931305	0.784126	0.514355	0.412344	0.121598	0.0640054	0.0249685	-0.00737469	-0.0429874	0.16021	NO
P46108	Adapter molecule crk	CRK	442720	386410	395590	339510	334930	485390	373880	404530	375230	343560	483762	393111	388452	366397	338168	1	0.872809	0.893544	0.766873	0.756528	1.0927	0.887944	0.87742	0.827604	0.763841	0.0927045	0.015135	-0.016124	0.0607312	0.00731293	0.15976	NO
P29353	SHC-transforming protein 1	SHC1	362830	317650	323000	245380	241390	381260	309480	339930	279250	247560	379981	325398	326419	272676	243674	1	0.875479	0.890224	0.676295	0.665298	1.04727	0.896834	0.899648	0.751526	0.671594	0.0472711	0.0213548	0.00942365	0.0752317	0.00629597	0.159577	NO
Q9HCK5	Protein argonaute-4	AGO4	12427	10499	10956	8825.6	8223.1	13551	10118	11708	10132	7754	13505.6	10638.4	11242.7	9893.49	7632.3	1	0.844854	0.881629	0.710196	0.661712	1.08679	0.856073	0.904696	0.796128	0.61417	0.0867912	0.0112192	0.0230671	0.0859329	-0.047542	0.159468	NO
Q9H2P9	Diphthine synthase	DPH5	293900	275170	253060	198900	184150	309630	262470	271640	225350	189530	308592	275970	260843	220045	186555	1	0.936271	0.861041	0.676761	0.626574	1.04999	0.938993	0.887524	0.748708	0.634757	0.0499884	0.00272265	0.0264833	0.0719468	0.00818371	0.159325	NO
O00221	NF-kappa-B inhibitor epsilon	NFKBIE	73458	64135	59805	40210	27358	85812	58630	61402	41856	30131	85524.2	61645.6	58961.5	40870.7	29658.1	1	0.873084	0.814139	0.547388	0.372431	1.16426	0.839196	0.802656	0.556382	0.403742	0.16426	-0.0338882	-0.0114824	0.00899411	0.0313114	0.159195	NO
P50613	Cyclin-dependent kinase 7	CDK7	279570	247470	232690	164420	127250	282420	239560	248900	181080	149030	281473	251882	239007	176817	146691	1	0.885181	0.832314	0.588117	0.455163	1.00681	0.900961	0.85491	0.632462	0.524702	0.00680632	0.0157807	0.0225963	0.0443441	0.0695385	0.159066	YES
Q15788	Nuclear receptor coactivator 1	NCOA1	264910	247490	239670	205310	183390	279250	241500	257310	213230	198490	278313	253922	247083	208210	195375	1	0.934242	0.904722	0.775018	0.692273	1.0506	0.95852	0.932705	0.785967	0.737513	0.0505963	0.0242784	0.027983	0.0109489	0.0452401	0.159047	NO
Q9UFW8	CGG triplet repeat-binding protein 1	CGGBP1	134780	125160	114150	84557	79582	139800	121320	120300	97630	83225	139331	127560	115519	95331.7	81918.7	1	0.928624	0.846936	0.627371	0.590459	1.03377	0.946432	0.85709	0.707314	0.607796	0.0337673	0.0178076	0.0101541	0.0799432	0.0173373	0.15901	NO
Q8N0X7	Spartin	SPG20	327480	306860	303450	215880	218540	328240	320880	281540	245290	253710	327139	337385	270350	239516	249728	1	0.937034	0.926621	0.659216	0.667338	0.998959	1.03024	0.825546	0.73139	0.762574	-0.00104075	0.0932103	-0.101075	0.0721746	0.0952359	0.158505	NO
Q03013	Glutathione S-transferase Mu 4;Glutathione S-transferase Mu 1	GSTM4;GSTM1	129460	117040	117430	92086	89607	134070	111380	119550	103940	100700	133620	117109	114798	101493	99119.4	1	0.904063	0.907076	0.711309	0.69216	1.03214	0.904595	0.886748	0.783973	0.765638	0.0321363	0.000531807	-0.0203277	0.0726649	0.0734778	0.158483	NO
Q9UJZ1	Stomatin-like protein 2, mitochondrial	STOML2	32229	30089	26830	20162	17538	32669	30295	29473	21842	18199	32559.4	31853.2	28301.6	21327.8	17913.4	1	0.9336	0.83248	0.625586	0.544168	1.01025	0.988341	0.87814	0.661759	0.555815	0.0102528	0.0547404	0.0456598	0.0361733	0.0116465	0.158473	NO
Q9P2N6	KAT8 regulatory NSL complex subunit 3	KANSL3	97293	90399	85442	64315	61807	112010	80564	81292	76909	66206	111634	84707.8	78061	75098.5	65166.8	1	0.929142	0.878193	0.661044	0.635267	1.1474	0.870647	0.802329	0.77188	0.6698	0.147404	-0.0584952	-0.0758639	0.110836	0.0345333	0.158413	NO
P50402	Emerin	EMD	311370	290550	270360	217870	235880	339660	290090	257810	256460	237520	338521	305011	247563	250423	233792	1	0.933134	0.868292	0.699714	0.757555	1.0872	0.979577	0.795077	0.804261	0.750849	0.0871981	0.0464426	-0.0732148	0.104547	-0.006706	0.158267	NO
Q15438	Cytohesin-1;Cytohesin-3	CYTH1;CYTH3	105500	97611	95405	77818	82183	123030	96547	89100	87545	81301	122617	101513	85558.6	85484.1	80024.9	1	0.925223	0.904313	0.737611	0.778986	1.16225	0.962208	0.810982	0.810276	0.75853	0.16225	0.0369849	-0.0933304	0.0726649	-0.0204557	0.158114	NO
Q86XK3	Swi5-dependent recombination DNA repair protein 1 homolog	SFR1	10755	8453.7	7914.7	6713.9	6150.2	9935.3	8623.7	9331.9	7070.4	6962	9901.98	9067.26	8961	6903.96	6852.73	1	0.786025	0.735909	0.624258	0.571846	0.920686	0.843074	0.833193	0.64193	0.637167	-0.0793138	0.0570489	0.0972846	0.0176717	0.0653209	0.158012	NO
Q15527	Surfeit locus protein 2	SURF2	51482	44958	37689	32871	25570	61168	41996	39202	32116	26998	60962.9	44156.1	37643.9	31360	26574.2	1	0.873276	0.732081	0.638495	0.496678	1.18416	0.857699	0.731205	0.609144	0.516185	0.184159	-0.0155769	-0.000876382	-0.0293506	0.0195068	0.157862	NO
Q96JC9	ELL-associated factor 1;ELL-associated factor 2	EAF1;EAF2	41189	36419	38385	29560	29884	41899	36952	38450	33766	31933	41758.5	38852.6	36921.8	32971.1	31431.8	1	0.884192	0.931924	0.717667	0.725534	1.01383	0.943277	0.896399	0.800484	0.763111	0.0138261	0.0590845	-0.0355248	0.0828166	0.0375777	0.15778	NO
O43665	Regulator of G-protein signaling 10	RGS10	253780	215850	212420	185320	182400	308000	208080	205040	193650	180910	306967	218783	196891	189091	178070	1	0.85054	0.837024	0.730239	0.718733	1.20958	0.862096	0.775831	0.7451	0.701673	0.209579	0.0115558	-0.0611927	0.0148608	-0.0170601	0.157743	NO
Q8NG68	Tubulin--tyrosine ligase	TTL	98629	86971	88042	78080	67512	105560	88153	92956	79469	71127	105206	92687.2	89261.4	77598.3	70010.6	1	0.881799	0.892658	0.791654	0.684505	1.06668	0.939756	0.905022	0.786769	0.709838	0.0666841	0.0579562	0.0123633	-0.00488435	0.0253334	0.157453	NO
Q92997	Segment polarity protein dishevelled homolog DVL-3	DVL3	17306	14913	12444	10722	9772.4	17387	15746	16154	10348	8513.3	17328.7	16555.9	15511.9	10104.4	8379.68	1	0.861724	0.719057	0.619554	0.564683	1.00131	0.956657	0.896333	0.583867	0.484206	0.00131105	0.0949323	0.177276	-0.0356869	-0.0804763	0.157357	NO
Q9Y2I8	WD repeat-containing protein 37	WDR37	30950	26350	18619	16551	13386	34302	24846	23131	15824	12950	34187	26124	22211.6	15451.5	12746.7	1	0.851373	0.601583	0.534766	0.432504	1.10459	0.84407	0.717662	0.499241	0.411849	0.104587	-0.00730346	0.116079	-0.0355252	-0.0206546	0.157182	NO
P20933	N(4)-(beta-N-acetylglucosaminyl)-L-asparaginase;Glycosylasparaginase alpha chain;Glycosylasparaginase beta chain	AGA	218600	194410	182500	151270	153440	241820	185760	174710	168000	169010	241009	195315	167766	164045	166357	1	0.889341	0.834858	0.691995	0.701921	1.10251	0.893479	0.767457	0.750435	0.761012	0.102511	0.00413813	-0.0674017	0.058441	0.0590909	0.15678	NO
Q96GS4	Uncharacterized protein C17orf59	C17orf59	26923	25937	24402	21925	20218	30678	24602	27991	21467	19645	30575.1	25867.4	26878.5	20961.7	19336.7	1	0.963377	0.906363	0.814359	0.750956	1.13565	0.960792	0.998346	0.778578	0.718221	0.13565	-0.00258486	0.0919836	-0.0357814	-0.0327357	0.156532	NO
Q9NP66	High mobility group protein 20A	HMG20A	96392	84540	72208	55025	47014	106520	83670	75812	57173	48262	106163	87973.6	72798.8	55827.1	47504.5	1	0.877044	0.749108	0.570846	0.487738	1.10136	0.912665	0.755237	0.579168	0.492826	0.101365	0.035621	0.00612899	0.00832144	0.00508853	0.156525	NO
P36543	V-type proton ATPase subunit E 1	ATP6V1E1	312950	284060	288730	228300	212170	315910	298360	287620	245890	233980	314851	313706	276188	240102	230308	1	0.907685	0.922607	0.72951	0.677968	1.00607	1.00242	0.882532	0.76722	0.735924	0.00607294	0.0947314	-0.0400758	0.0377109	0.0579566	0.156396	NO
Q9Y3C4	EKC/KEOPS complex subunit TPRKB	TPRKB	79227	68946	67036	57230	38928	90302	69241	71078	54142	40471	89999.2	72802.4	68252.9	52867.5	39835.8	1	0.870234	0.846126	0.722355	0.491348	1.13597	0.918909	0.861486	0.667291	0.502806	0.135966	0.0486756	0.0153602	-0.0550637	0.0114579	0.156396	NO
P01137	Transforming growth factor beta-1;Latency-associated peptide	TGFB1	175570	150220	158410	139360	126570	186670	151020	172390	140690	131790	186044	158788	165538	137378	129721	1	0.855613	0.902261	0.793757	0.720909	1.05966	0.904413	0.942862	0.782469	0.738859	0.0596569	0.0487996	0.0406004	-0.0112884	0.0179499	0.155718	NO
P15170	Eukaryotic peptide chain release factor GTP-binding subunit ERF3A	GSPT1	1276200	1213000	1198700	986100	1063500	1451200	1190100	1136300	1092300	1097900	1.44633e+06	1.25131e+06	1.09114e+06	1.06659e+06	1.08067e+06	1	0.950478	0.939273	0.772685	0.833333	1.13331	0.980499	0.854989	0.835752	0.846786	0.133312	0.0300211	-0.084284	0.0630675	0.0134522	0.155569	NO
Q5MNZ9	WD repeat domain phosphoinositide-interacting protein 1	WIPI1	83074	78626	72350	58565	58947	83088	76035	76948	65774	64620	82809.3	79945.9	73889.6	64225.6	63605.7	1	0.946457	0.87091	0.704974	0.709572	0.996814	0.962345	0.889444	0.773114	0.765652	-0.00318576	0.0158879	0.0185333	0.0681398	0.0560794	0.155455	NO
P06396	Gelsolin	GSN	511450	468330	468300	385000	344410	524880	460590	491800	418070	374860	523120	484281	472253	408228	368976	1	0.915691	0.915632	0.752762	0.673399	1.02282	0.946878	0.923361	0.798179	0.721432	0.0228169	0.0311869	0.00772896	0.0454168	0.0480327	0.155182	NO
O43502	DNA repair protein RAD51 homolog 3	RAD51C	18507	17402	14145	13202	11126	20419	17296	14450	13774	11574	20350.5	18185.6	13875.7	13449.8	11392.3	1	0.940293	0.764305	0.713352	0.601178	1.09961	0.982635	0.749753	0.726739	0.615569	0.0996121	0.0423419	-0.0145528	0.013387	0.0143912	0.155179	NO
P36969	Phospholipid hydroperoxide glutathione peroxidase, mitochondrial	GPX4	537850	469300	479490	387180	390880	577010	460910	484320	424760	415080	575075	484617	465070	414761	408565	1	0.872548	0.891494	0.719866	0.726745	1.06921	0.901026	0.864684	0.771146	0.759626	0.0692105	0.0284782	-0.0268099	0.05128	0.032881	0.15504	NO
Q32P44	Echinoderm microtubule-associated protein-like 3	EML3	568360	511180	448040	291600	256580	580180	478290	489450	351870	273390	578234	502891	469996	343587	269099	1	0.899395	0.788303	0.513055	0.451439	1.01737	0.884811	0.826934	0.604523	0.473466	0.0173732	-0.0145842	0.0386311	0.0914681	0.0220264	0.154915	NO
Q96DU7	Inositol-trisphosphate 3-kinase C	ITPKC	44940	40726	37981	28061	24058	47127	38830	38994	30805	27843	46968.9	40827.2	37444.1	30079.8	27406	1	0.906231	0.845149	0.62441	0.535336	1.04515	0.908483	0.833203	0.669333	0.609835	0.045148	0.00225249	-0.0119459	0.0449229	0.074499	0.154876	NO
Q92466	DNA damage-binding protein 2	DDB2	127130	117960	112610	91714	95991	124830	113440	120590	104420	105290	124411	119275	115797	101962	103637	1	0.927869	0.885786	0.721419	0.755062	0.978615	0.938211	0.910855	0.802029	0.815208	-0.0213848	0.0103422	0.0250692	0.0806096	0.0601463	0.154783	NO
Q14686	Nuclear receptor coactivator 6	NCOA6	143650	134680	129990	108170	111320	144550	132910	142110	117770	116580	144065	139746	136462	114998	114750	1	0.937557	0.904908	0.753011	0.774939	1.00289	0.972825	0.94996	0.80054	0.798818	0.0028905	0.035268	0.045052	0.0475297	0.0238788	0.154619	NO
Q5T3I0	G patch domain-containing protein 4	GPATCH4	66889	58660	58813	45512	43604	70816	55671	60080	48896	50043	70578.5	58534.4	57692.1	47745	49257.5	1	0.876975	0.879263	0.680411	0.651886	1.05516	0.875098	0.862505	0.713794	0.736407	0.0551586	-0.00187704	-0.0167581	0.0333831	0.0845212	0.154428	NO
Q9NX70	Mediator of RNA polymerase II transcription subunit 29	MED29	48028	37063	34143	26100	26204	48020	36305	38096	29465	28009	47859	38172.4	36581.8	28771.4	27569.4	1	0.771696	0.710898	0.543433	0.545598	0.99648	0.794794	0.761677	0.599054	0.574027	-0.00351973	0.0230981	0.0507796	0.0556213	0.0284288	0.154408	NO
Q13185	Chromobox protein homolog 3	CBX3	508050	405830	443050	324740	324400	535560	405740	451200	378650	326220	533764	426609	433267	369736	321100	1	0.798799	0.87206	0.639189	0.63852	1.05061	0.839699	0.852803	0.727756	0.632024	0.0506129	0.0409001	-0.0192566	0.0885669	-0.00649593	0.154327	NO
Q8NFH3	Nucleoporin Nup43	NUP43	372160	340190	299200	240960	222330	444450	319300	301890	248100	224690	442959	335723	289891	242260	221163	1	0.914096	0.803955	0.647463	0.597404	1.19024	0.902094	0.778942	0.650956	0.594269	0.190239	-0.0120022	-0.0250131	0.00349206	-0.00313486	0.153581	NO
Q6PCD5	E3 ubiquitin-protein ligase RFWD3	RFWD3	12246	8480.4	6651.4	5783.9	5367.4	15001	7585	7267.8	5504.3	5208.8	14950.7	7975.14	6978.93	5374.73	5127.04	1	0.692504	0.543149	0.472309	0.438298	1.22086	0.651244	0.569895	0.438896	0.418671	0.220863	-0.0412595	0.0267463	-0.0334129	-0.0196273	0.15331	NO
P17483	Homeobox protein Hox-B4	HOXB4	16833	16851	17365	14763	15140	18282	16081	17963	15773	15997	18220.7	16908.1	17249	15401.7	15745.9	1	1.00107	1.0316	0.877027	0.899424	1.08244	1.00446	1.02472	0.91497	0.935419	0.0824385	0.00339385	-0.00688856	0.0379431	0.0359957	0.152883	NO
P13929	Beta-enolase	ENO3	44319	41933	38099	33177	25907	48765	41998	38276	33836	28092	48601.5	44158.2	36754.7	33039.5	27651.1	1	0.946163	0.859654	0.748595	0.584557	1.09663	0.996371	0.829321	0.745493	0.62391	0.096628	0.0502081	-0.0303327	-0.00310287	0.0393528	0.152753	NO
Q7Z6L1	Tectonin beta-propeller repeat-containing protein 1	TECPR1	10857	8708.2	7885.9	5854.2	4417.9	11137	8224.1	8902.1	6500.1	4813.7	11099.6	8647.11	8548.28	6347.08	4738.15	1	0.802082	0.726342	0.53921	0.406917	1.02235	0.796455	0.787352	0.584608	0.436414	0.0223496	-0.00562698	0.0610093	0.0453979	0.0294967	0.152626	NO
Q8NCN2	Zinc finger and BTB domain-containing protein 34	ZBTB34	49324	42708	43565	33723	29108	52987	42183	43158	36070	32642	52809.3	44352.7	41442.6	35220.9	32129.7	1	0.865867	0.883241	0.683704	0.590139	1.07066	0.899211	0.840213	0.714072	0.6514	0.0706613	0.0333446	-0.0430288	0.0303685	0.0612615	0.152607	NO
Q92665	28S ribosomal protein S31, mitochondrial	MRPS31	76515	61647	57921	44340	43492	81470	58775	60552	49669	46657	81196.8	61798.1	58145.3	48499.8	45924.7	1	0.805685	0.756989	0.579494	0.568411	1.06119	0.80766	0.75992	0.63386	0.600205	0.0611876	0.00197479	0.00293155	0.0543654	0.0317936	0.152253	NO
P27348	14-3-3 protein theta	YWHAQ	977300	867820	899190	727370	744330	1051700	868820	875530	830270	763470	1.04817e+06	913508	840731	810725	751487	1	0.887977	0.920076	0.744265	0.761619	1.07252	0.934726	0.860259	0.829556	0.768942	0.0725191	0.0467491	-0.0598165	0.0852911	0.00732302	0.152066	NO
O43318	Mitogen-activated protein kinase kinase kinase 7	MAP3K7	288410	256450	243980	190620	173150	301790	248570	248490	209890	193810	300778	261355	238614	204949	190768	1	0.889186	0.845948	0.660934	0.600361	1.04288	0.906193	0.827341	0.710617	0.661447	0.042883	0.0170079	-0.018607	0.049683	0.0610867	0.152054	YES
P47756	F-actin-capping protein subunit beta	CAPZB	1170200	1067700	1048400	894480	884030	1289700	1033000	1066400	969100	915190	1.28537e+06	1.08613e+06	1.02401e+06	946287	900825	1	0.912408	0.895915	0.764382	0.755452	1.09842	0.92816	0.875077	0.808654	0.769805	0.0984231	0.0157516	-0.0208383	0.0442718	0.0143526	0.151961	NO
P09972	Fructose-bisphosphate aldolase C	ALDOC	1049700	977200	946660	840140	824860	1179300	941320	995550	857110	853320	1.17534e+06	989737	955981	836933	839927	1	0.930933	0.901839	0.800362	0.785805	1.1197	0.942876	0.910718	0.797307	0.800159	0.119696	0.0119434	0.00887967	-0.00305495	0.0143532	0.151817	NO
Q9NP61	ADP-ribosylation factor GTPase-activating protein 3	ARFGAP3	630850	625190	579300	470290	466600	636630	593850	592810	517620	542910	634495	624395	569248	505435	534389	1	0.991028	0.918285	0.745486	0.739637	1.00578	0.989767	0.902351	0.801197	0.847093	0.0057778	-0.00126057	-0.0159337	0.0557105	0.107456	0.15175	NO
P46019	Phosphorylase b kinase regulatory subunit alpha, liver isoform	PHKA2	60578	49130	37679	28067	22757	66808	46039	43358	30296	21518	66583.9	48407	41634.7	29582.8	21180.3	1	0.811021	0.621991	0.46332	0.375664	1.09914	0.799086	0.687291	0.488343	0.349636	0.099144	-0.0119346	0.0652993	0.0250226	-0.0260283	0.151503	NO
P15559	NAD(P)H dehydrogenase [quinone] 1	NQO1	560140	540800	485870	365920	355710	581210	534300	498820	400290	388310	579261	561782	478994	390867	382215	1	0.965473	0.867408	0.653265	0.635038	1.03414	1.00293	0.855133	0.697802	0.682357	0.0341357	0.0374581	-0.0122756	0.044537	0.0473189	0.151174	NO
P62070	Ras-related protein R-Ras2	RRAS2	160660	142010	138980	113820	92947	160910	141580	140550	122030	111090	160370	148862	134964	119157	109346	1	0.883916	0.865057	0.708453	0.578532	0.998197	0.926567	0.840058	0.741674	0.680607	-0.00180285	0.0426503	-0.0249987	0.0332214	0.102075	0.151145	NO
A4D2B0	Metallo-beta-lactamase domain-containing protein 1	MBLAC1	13753	12409	13377	9825.2	9980.3	15981	13062	12096	10948	9606.3	15927.4	13733.8	11615.2	10690.3	9455.52	1	0.902276	0.972661	0.714404	0.725682	1.1581	0.998607	0.84456	0.777305	0.687524	0.158104	0.0963314	-0.1281	0.0629011	-0.0381573	0.151079	NO
Q8IUI8	Cytokine receptor-like factor 3	CRLF3	300200	277770	277620	227210	217240	330760	271410	276070	246790	227830	329651	285370	265097	240980	224254	1	0.925283	0.924783	0.756862	0.723651	1.0981	0.9506	0.883069	0.802733	0.747015	0.0981037	0.0253165	-0.0417143	0.0458709	0.0233646	0.150941	NO
Q969J3	Loss of heterozygosity 12 chromosomal region 1 protein	LOH12CR1	28654	25561	25849	24788	19952	34918	24195	26713	23934	20181	34800.9	25439.5	25651.3	23370.6	19864.2	1	0.892057	0.902108	0.86508	0.696308	1.21452	0.887816	0.895207	0.815613	0.693245	0.214521	-0.00424117	-0.00690066	-0.0494667	-0.00306258	0.15085	NO
Q9BXL5	Hemogen	HEMGN	1329900	1177400	1215300	959440	1025500	1360600	1163300	1241800	1092500	1086800	1.35604e+06	1.22313e+06	1.19244e+06	1.06678e+06	1.06974e+06	1	0.88533	0.913828	0.721438	0.771111	1.01965	0.919719	0.896642	0.802152	0.804378	0.0196533	0.0343894	-0.0171866	0.0807144	0.0332671	0.150838	NO
O75608	Acyl-protein thioesterase 1	LYPLA1	150060	141110	132710	109020	110720	147060	139160	141560	116750	125310	146567	146318	135934	114002	123343	1	0.940357	0.88438	0.726509	0.737838	0.976721	0.975061	0.905861	0.759707	0.821959	-0.0232787	0.0347042	0.0214819	0.0331977	0.0841208	0.150226	NO
Q15637	Splicing factor 1	SF1	674340	614770	602450	476660	470860	710750	591730	608700	529630	516250	708366	622166	584507	517162	508147	1	0.911662	0.893392	0.706854	0.698253	1.05046	0.922629	0.866783	0.766916	0.753547	0.0504587	0.0109674	-0.0266087	0.0600621	0.0552942	0.150174	NO
O60216	Double-strand-break repair protein rad21 homolog	RAD21	152540	123250	118660	75719	66743	163190	118140	127260	83547	70208	162643	124217	122202	81580.3	69106	1	0.807985	0.777894	0.496388	0.437544	1.06623	0.814321	0.801114	0.534812	0.453035	0.0662299	0.00633637	0.0232197	0.0384244	0.0154912	0.149702	NO
Q96EP5	DAZ-associated protein 1	DAZAP1	263720	251490	243240	201870	217860	282560	241270	241210	225070	234540	281612	253680	231623	219772	230859	1	0.953625	0.922342	0.765471	0.826103	1.06785	0.961928	0.878291	0.833353	0.875393	0.0678461	0.00830335	-0.0440509	0.0678816	0.0492899	0.14927	NO
Q8WY36	HMG box transcription factor BBX	BBX	27608	24179	25452	21222	16618	31177	23593	25703	20138	19277	31072.4	24806.5	24681.4	19663.9	18974.4	1	0.875797	0.921907	0.76869	0.601927	1.12549	0.898526	0.893995	0.712255	0.68728	0.125487	0.0227293	-0.0279118	-0.056435	0.0853533	0.149223	NO
Q01813	ATP-dependent 6-phosphofructokinase, platelet type	PFKP	1742800	1598400	1420300	1031400	958880	1674800	1532900	1514100	1189000	1133500	1.66918e+06	1.61174e+06	1.45392e+06	1.16101e+06	1.11571e+06	1	0.917145	0.814953	0.591806	0.550195	0.957759	0.924802	0.834244	0.666175	0.640182	-0.0422405	0.00765719	0.0192912	0.074369	0.0899867	0.149064	NO
Q6UB99	Ankyrin repeat domain-containing protein 11	ANKRD11	72504	63089	64786	52365	51304	74875	63826	66386	58153	53430	74623.9	67108.9	63747.4	56784.1	52591.4	1	0.870145	0.893551	0.722236	0.707602	1.02924	0.925589	0.879226	0.783185	0.725358	0.0292383	0.0554438	-0.0143243	0.0609491	0.017756	0.149063	NO
Q9UPN7	Serine/threonine-protein phosphatase 6 regulatory subunit 1	PPP6R1	292550	257250	236660	167970	146220	294020	249800	268380	178200	159290	293034	262649	257713	174005	156790	1	0.879337	0.808956	0.574158	0.499812	1.00165	0.89779	0.88092	0.594788	0.535942	0.00165422	0.0184533	0.0719638	0.0206292	0.03613	0.14883	NO
Q13177	Serine/threonine-protein kinase PAK 2;PAK-2p27;PAK-2p34	PAK2	1406700	1235500	1242700	1010300	1032800	1485800	1201600	1243400	1146200	1097100	1.48082e+06	1.2634e+06	1.19398e+06	1.11922e+06	1.07988e+06	1	0.878297	0.883415	0.718206	0.734201	1.05269	0.898134	0.848781	0.795634	0.767669	0.0526886	0.0198368	-0.0346343	0.0774279	0.0334686	0.148788	YES
P50552	Vasodilator-stimulated phosphoprotein	VASP	777650	747140	735410	631480	642220	863960	734130	742560	664130	665490	861063	771890	713046	648496	655045	1	0.960766	0.945683	0.812036	0.825847	1.10726	0.992593	0.916924	0.833918	0.842339	0.107262	0.0318268	-0.0287581	0.0218814	0.0164916	0.148704	NO
Q8TE04	Pantothenate kinase 1	PANK1	34024	29839	32039	28117	25525	38491	29479	30226	28464	28871	38361.9	30995.3	29024.6	27793.9	28417.8	1	0.876999	0.941659	0.826387	0.750206	1.1275	0.910982	0.853064	0.816892	0.83523	0.127496	0.0339836	-0.0885951	-0.00949496	0.0850238	0.148413	NO
Q9BUL9	Ribonuclease P protein subunit p25	RPP25	38751	33414	33744	28345	25940	40610	32787	33471	31984	28065	40473.8	34473.4	32140.7	31231.1	27624.5	1	0.862275	0.87079	0.731465	0.669402	1.04446	0.889613	0.829415	0.805943	0.712872	0.0444584	0.0273388	-0.0413753	0.0744776	0.0434698	0.148369	NO
Q8IW45	ATP-dependent (S)-NAD(P)H-hydrate dehydratase	CARKD	113880	102150	99838	84265	73526	115010	95872	108920	93774	80228	114624	100803	104591	91566.5	78968.8	1	0.896997	0.876695	0.739946	0.645645	1.00654	0.88517	0.918431	0.804061	0.693438	0.00653573	-0.0118266	0.0417359	0.0641159	0.0477939	0.148355	NO
P55957	BH3-interacting domain death agonist;BH3-interacting domain death agonist p15;BH3-interacting domain death agonist p13;BH3-interacting domain death agonist p11	BID	289230	263080	250540	209780	206430	309510	252090	263330	220340	223830	308472	265056	252864	215153	220317	1	0.909588	0.866231	0.725305	0.713723	1.06653	0.91642	0.874265	0.743882	0.761736	0.0665283	0.00683293	0.00803415	0.0185772	0.0480131	0.147986	NO
Q8N465	D-2-hydroxyglutarate dehydrogenase, mitochondrial	D2HGDH	80308	74832	71180	62576	60276	81307	74743	76109	65265	65651	81034.3	78587.4	73084	63728.6	64620.6	1	0.931813	0.886338	0.7792	0.75056	1.00904	0.978575	0.910046	0.793553	0.804659	0.00904417	0.0467627	0.0237085	0.0143526	0.0540987	0.147967	NO
O75348	V-type proton ATPase subunit G 1	ATP6V1G1	224750	205410	195020	154190	169130	268920	199550	191010	170990	155930	268018	209814	183418	166965	153483	1	0.913949	0.86772	0.686051	0.752525	1.19252	0.933543	0.816099	0.742891	0.682904	0.192517	0.0195946	-0.0516212	0.0568401	-0.0696215	0.147709	NO
A6NDU8	UPF0600 protein C5orf51	C5orf51	306090	279310	270410	200340	211550	316220	270600	266430	234710	231630	315159	284518	255841	229185	227994	1	0.912509	0.883433	0.654513	0.691137	1.02963	0.929525	0.835834	0.74875	0.744861	0.0296301	0.0170158	-0.0475987	0.0942364	0.0537241	0.147008	NO
Q13838	Spliceosome RNA helicase DDX39B	DDX39B	315270	273330	273600	220620	227980	343590	264240	274090	250070	233140	342438	277831	263196	244183	229481	1	0.866971	0.867828	0.699781	0.723126	1.08617	0.881249	0.834827	0.774521	0.727886	0.0861728	0.0142774	-0.0330001	0.0747398	0.00476005	0.14695	NO
O94826	Mitochondrial import receptor subunit TOM70	TOMM70A	115620	106390	100990	81071	76497	116810	109610	105210	86981	81163	116418	115248	101028	84933.4	79889.1	1	0.92017	0.873465	0.701185	0.661624	1.0069	0.996781	0.873796	0.734591	0.690963	0.0069041	0.0766114	0.00033157	0.0334062	0.0293383	0.146592	NO
Q14116	Interleukin-18	IL18	115600	108330	107390	87927	85622	116780	107370	110270	94273	96089	116388	112893	105887	92053.8	94580.8	1	0.937111	0.928979	0.760614	0.740675	1.00682	0.97658	0.915979	0.796313	0.818173	0.00681966	0.0394688	-0.0129998	0.0356987	0.0774984	0.146486	NO
Q9Y6J0	Calcineurin-binding protein cabin-1	CABIN1	36214	33562	31935	24939	23491	42916	30221	30516	26801	25815	42772.1	31775.4	29303.1	26170.1	25409.8	1	0.926769	0.881841	0.688656	0.648672	1.18109	0.877435	0.809165	0.722651	0.701657	0.181092	-0.0493339	-0.0726759	0.0339949	0.0529855	0.146063	NO
Q86SX6	Glutaredoxin-related protein 5, mitochondrial	GLRX5	98990	89866	85595	61756	53594	109340	82066	88130	73298	53609	108973	86287.1	84627.2	71572.5	52767.6	1	0.907829	0.864683	0.623861	0.541408	1.10085	0.871675	0.854907	0.723028	0.53306	0.100852	-0.0361544	-0.00977679	0.0991669	-0.00834864	0.145739	NO
Q9BVT8	Transmembrane and ubiquitin-like domain-containing protein 1	TMUB1	11623	10049	9302.9	7993.3	7882.3	11924	9291.1	10608	8869.7	8171.1	11884	9768.99	10186.4	8660.9	8042.85	1	0.864579	0.800387	0.687714	0.678164	1.02246	0.840488	0.876398	0.745152	0.691977	0.0224564	-0.0240911	0.076011	0.0574381	0.013813	0.145627	NO
Q9H8Y5	Ankyrin repeat and zinc finger domain-containing protein 1	ANKZF1	49568	36102	29907	21792	18831	51157	32343	33106	25273	22292	50985.4	34006.6	31790.2	24678.1	21942.1	1	0.728333	0.603353	0.439638	0.379902	1.0286	0.686059	0.641345	0.497863	0.442667	0.0285957	-0.0422739	0.0379917	0.0582243	0.0627645	0.145302	NO
Q8IZL2	Mastermind-like protein 2	MAML2	25173	22897	22909	22330	18697	24592	22827	26966	21837	20253	24509.5	24001.1	25894.2	21322.9	19935.1	1	0.909586	0.910062	0.887062	0.74274	0.973643	0.953447	1.02865	0.847056	0.791924	-0.0263566	0.0438609	0.118588	-0.0400053	0.0491842	0.145271	NO
P28066	Proteasome subunit alpha type-5	PSMA5	1218900	1095200	1052200	775380	847950	1290000	1062100	1053500	904370	882890	1.28567e+06	1.11673e+06	1.01163e+06	883081	869032	1	0.898515	0.863237	0.636131	0.695668	1.05478	0.916178	0.829951	0.72449	0.712964	0.0547819	0.0176629	-0.033286	0.0883589	0.0172963	0.144814	NO
Q8WXI9	Transcriptional repressor p66-beta	GATAD2B	285520	243670	212190	165340	163260	325490	226670	217030	181540	165520	324398	238329	208404	177266	162922	1	0.853425	0.74317	0.579084	0.571799	1.13617	0.834718	0.72991	0.620855	0.570615	0.136167	-0.0187069	-0.0132602	0.041771	-0.00118365	0.144787	NO
Q9BQG2	Peroxisomal NADH pyrophosphatase NUDT12	NUDT12	662160	593150	583380	465350	433130	671470	581150	594460	514670	487010	669218	611042	570833	502554	479366	1	0.89578	0.881026	0.702776	0.654117	1.01066	0.9228	0.862077	0.758962	0.723943	0.0106592	0.02702	-0.0189491	0.0561864	0.0698261	0.144743	NO
P78345	Ribonuclease P protein subunit p38	RPP38	330850	284300	286520	200530	188610	356330	260070	304170	233850	192690	355135	273447	292080	228345	189666	1	0.859302	0.866012	0.606105	0.570077	1.0734	0.826498	0.882818	0.690177	0.573268	0.0734018	-0.0328042	0.0168067	0.0840715	0.00319055	0.144666	NO
O75884	Putative hydrolase RBBP9	RBBP9	61772	53178	53450	44639	45009	64248	52615	54389	49000	48294	64032.5	55321.3	52227.3	47846.5	47536	1	0.860875	0.865279	0.722641	0.728631	1.03659	0.895572	0.845484	0.774566	0.769539	0.0365947	0.0346963	-0.0197944	0.0519251	0.0409084	0.14433	NO
Q02446	Transcription factor Sp4	SP4	10940	8794.8	9226.1	7989	7463.6	11129	8623.8	10198	8857.3	7509.8	11091.7	9067.37	9792.67	8648.79	7391.93	1	0.803912	0.843336	0.730256	0.68223	1.01386	0.828827	0.895125	0.790566	0.675679	0.0138644	0.0249147	0.051789	0.0603103	-0.00655134	0.144327	NO
Q8TBE9	N-acylneuraminate-9-phosphatase	NANP	100400	86711	83999	64001	56121	99518	83181	93771	69535	62098	99184.2	87459.4	90044	67898.1	61123.3	1	0.863655	0.836643	0.63746	0.558974	0.987891	0.87111	0.896852	0.676276	0.608798	-0.0121091	0.00745446	0.0602091	0.0388159	0.049824	0.144194	NO
P08754	Guanine nucleotide-binding protein G(k) subunit alpha	GNAI3	70059	67102	67151	66954	54890	77609	66944	70568	63026	60160	77348.7	70387.3	67763.2	61542.3	59215.7	1	0.957793	0.958492	0.95568	0.783482	1.10405	1.00469	0.967231	0.878436	0.845227	0.104051	0.046893	0.00873853	-0.0772444	0.0617443	0.144183	NO
Q99767	Amyloid beta A4 precursor protein-binding family A member 2	APBA2	53928	50944	46932	36912	31458	57255	50909	48654	38961	33099	57063	53527.5	46720.2	38043.8	32579.5	1	0.944667	0.870271	0.684468	0.583333	1.05813	0.992574	0.866344	0.705456	0.604129	0.0581328	0.0479067	-0.00392738	0.020988	0.020796	0.143896	NO
O75128	Protein cordon-bleu	COBL	55863	52246	48798	43850	39580	71772	46215	52601	43137	36185	71531.3	48592.1	50510.3	42121.5	35617.1	1	0.935252	0.87353	0.784956	0.708519	1.28048	0.869844	0.904182	0.754015	0.637579	0.280477	-0.0654087	0.0306523	-0.0309412	-0.0709405	0.143839	NO
Q6ICL3	Transport and Golgi organization protein 2 homolog	TANGO2	73371	73034	63094	59062	57529	79207	74177	65376	58424	60838	78941.4	77992.3	62777.6	57048.7	59883.1	1	0.995407	0.859931	0.804977	0.784084	1.07592	1.06299	0.855618	0.777537	0.816169	0.0759205	0.0675785	-0.00431269	-0.0274404	0.0320849	0.143831	NO
Q8WWK9	Cytoskeleton-associated protein 2	CKAP2	56979	47583	41174	30824	30177	56104	48398	47131	33286	30842	55915.8	50887.4	45257.7	32502.4	30357.9	1	0.835097	0.722617	0.540971	0.529616	0.981341	0.89309	0.794288	0.570428	0.532791	-0.0186587	0.0579926	0.0716709	0.029457	0.00317508	0.143637	NO
O75439	Mitochondrial-processing peptidase subunit beta	PMPCB	489710	441400	434790	346330	334580	480360	442900	451710	392270	361600	478749	465681	433756	383036	355924	1	0.90135	0.887852	0.707214	0.683221	0.977617	0.950931	0.885741	0.782169	0.726807	-0.0223826	0.0495817	-0.00211066	0.0749541	0.0435859	0.143628	NO
P15311	Ezrin	EZR	1721300	1577400	1551800	1195600	1304000	1826200	1489100	1553500	1375500	1398200	1.82008e+06	1.56569e+06	1.49175e+06	1.34312e+06	1.37625e+06	1	0.9164	0.901528	0.694591	0.757567	1.05738	0.909599	0.866644	0.780294	0.799544	0.0573842	-0.00680178	-0.0348836	0.0857027	0.0419766	0.143378	NO
P20674	Cytochrome c oxidase subunit 5A, mitochondrial	COX5A	177010	162770	161210	133270	145220	195030	161860	152470	146270	153440	194376	170185	146410	142827	151032	1	0.919553	0.91074	0.752895	0.820406	1.09811	0.961445	0.827128	0.806885	0.853238	0.098107	0.041892	-0.0836114	0.0539898	0.0328323	0.14321	NO
P00441	Superoxide dismutase [Cu-Zn]	SOD1	736930	652910	686850	585080	629530	761070	646510	670620	676880	663880	758518	679763	643966	660946	653460	1	0.885986	0.932042	0.793942	0.85426	1.02929	0.922426	0.873849	0.896891	0.886733	0.0292939	0.0364395	-0.0581933	0.102949	0.0324725	0.142961	NO
P15056	Serine/threonine-protein kinase B-raf	BRAF	65602	56945	52137	36883	35787	68009	55184	53914	44001	36762	67780.9	58022.4	51771.1	42965.2	36185	1	0.868038	0.794747	0.562224	0.545517	1.03321	0.884461	0.78917	0.654937	0.551584	0.0332142	0.0164232	-0.00557695	0.0927136	0.0060668	0.142841	YES
Q9NVA2	Septin-11	44450	428850	392950	380650	296390	309440	462820	366510	390440	345080	315980	461268	385361	374922	336957	311020	1	0.916288	0.887606	0.691127	0.721558	1.07559	0.898593	0.874249	0.785721	0.725243	0.0755925	-0.017695	-0.0133575	0.094594	0.00368536	0.142819	NO
Q8NFZ5	TNFAIP3-interacting protein 2	TNIP2	10891	11313	10811	10532	8048.8	13526	11621	11985	8919.9	7344.9	13480.6	12218.7	11508.6	8709.92	7229.62	1	1.03875	0.992654	0.967037	0.739032	1.23778	1.12191	1.05671	0.799736	0.663816	0.237778	0.083163	0.0640571	-0.167301	-0.0752166	0.14248	NO
O43543	DNA repair protein XRCC2	XRCC2	29008	23623	22895	17866	11612	30450	23963	25094	17621	12479	30347.9	25195.5	24096.6	17206.2	12283.1	1	0.814362	0.789265	0.615899	0.400303	1.04619	0.868572	0.830689	0.593153	0.42344	0.04619	0.0542106	0.0414236	-0.0227457	0.0231361	0.142215	NO
Q9BSU3	N-alpha-acetyltransferase 11	NAA11	106710	88466	87685	62728	51252	116900	85450	91570	72028	48139	116508	89845.1	87930.5	70332.4	47383.4	1	0.829032	0.821713	0.587836	0.480292	1.09182	0.841956	0.824013	0.659099	0.444039	0.0918185	0.0129241	0.00230035	0.0712625	-0.0362532	0.142052	NO
P54252	Ataxin-3	ATXN3	181770	179440	157550	115530	92255	195240	179860	164120	122940	92463	194585	189111	157597	120046	91011.7	1	0.987182	0.866755	0.635583	0.507537	1.0705	1.04039	0.867013	0.660428	0.500697	0.0705024	0.0532053	0.000258054	0.0248442	-0.00683981	0.14197	NO
P48382	DNA-binding protein RFX5	RFX5	58818	53417	56191	47522	44828	63739	51767	59625	47424	48363	63525.2	54429.6	57255.2	46307.6	47603.9	1	0.908174	0.955337	0.80795	0.762148	1.08003	0.925391	0.973429	0.787303	0.809343	0.0800306	0.0172166	0.0180923	-0.0206465	0.0471949	0.141888	NO
P63220	40S ribosomal protein S21	RPS21	318550	288520	280510	227050	244090	341760	290730	286260	245540	246820	340614	305684	274882	239760	242946	1	0.905729	0.880584	0.712761	0.766253	1.06926	0.95961	0.862917	0.75266	0.762662	0.0692633	0.0538808	-0.0176665	0.0398991	-0.00359133	0.141786	NO
P07355	Annexin A2;Putative annexin A2-like protein	ANXA2;ANXA2P2	1171500	1142700	1071400	900770	980080	1239800	1089600	1100000	990210	1044100	1.23564e+06	1.14564e+06	1.05628e+06	966900	1.02771e+06	1	0.975416	0.914554	0.768903	0.836603	1.05475	0.977929	0.901647	0.825352	0.877262	0.0547521	0.0025128	-0.0129069	0.056449	0.0406591	0.141466	NO
Q9BY11	Protein kinase C and casein kinase substrate in neurons protein 1	PACSIN1	38872	29609	29138	22398	18676	41637	27934	31986	23259	20210	41497.4	29370.8	30714.7	22711.5	19892.8	1	0.761705	0.749588	0.576199	0.480449	1.06754	0.755577	0.790149	0.584263	0.511751	0.0675386	-0.00612807	0.040561	0.00806421	0.0313025	0.141338	NO
P35914	Hydroxymethylglutaryl-CoA lyase, mitochondrial	HMGCL	133010	126610	117090	103920	106330	150710	122920	119340	108760	107190	150205	129242	114597	106200	105508	1	0.951883	0.88031	0.781295	0.799414	1.12927	0.971674	0.861565	0.798434	0.79323	0.129273	0.0197911	-0.018745	0.0171396	-0.00618317	0.141275	NO
P06730	Eukaryotic translation initiation factor 4E	EIF4E	600980	530320	543020	400980	433620	616390	521010	547060	469420	455130	614323	547808	525317	458370	447986	1	0.882425	0.903558	0.66721	0.721522	1.0222	0.911525	0.8741	0.762704	0.745426	0.0222017	0.0290995	-0.0294575	0.0954934	0.023905	0.141242	NO
Q92851	Caspase-10;Caspase-10 subunit p23/17;Caspase-10 subunit p12	CASP10	96390	78893	69360	36932	22453	105890	74591	74994	40418	22545	105535	78427.6	72013.3	39466.5	22191.1	1	0.818477	0.719577	0.383152	0.232939	1.09487	0.813649	0.747103	0.409446	0.230222	0.0948737	-0.0048283	0.0275267	0.0262946	-0.00271667	0.14115	NO
Q9C0C9	E2/E3 hybrid ubiquitin-protein ligase UBE2O	UBE2O	1108300	988070	957110	763420	761450	1153600	939710	990880	843540	834930	1.14973e+06	988044	951497	823683	821825	1	0.891519	0.863584	0.688821	0.687043	1.03738	0.891495	0.858519	0.743195	0.741519	0.0373826	-2.33413e-05	-0.00506487	0.054374	0.0544755	0.141144	NO
Q92769	Histone deacetylase 2	HDAC2	734980	667400	604170	419070	448740	798120	607320	596790	534870	455620	795443	638558	573070	522279	448469	1	0.908052	0.822022	0.570179	0.610547	1.08227	0.868809	0.779708	0.710603	0.610178	0.0822653	-0.0392424	-0.042314	0.140424	-0.000369101	0.140764	NO
P68104	Elongation factor 1-alpha 1;Putative elongation factor 1-alpha-like 3	EEF1A1;EEF1A1P5	2982800	2591700	2013300	1302900	1133800	3340400	2383600	2059800	1515200	1169800	3.3292e+06	2.5062e+06	1.97793e+06	1.47953e+06	1.15144e+06	1	0.868882	0.67497	0.436804	0.380113	1.11613	0.840218	0.663112	0.496021	0.386026	0.116132	-0.0286641	-0.0118575	0.0592167	0.00591362	0.14074	NO
P48449	Lanosterol synthase	LSS	20798	17151	16860	13419	11886	23303	17792	16595	13979	11705	23224.8	18707.1	15935.4	13649.9	11521.3	1	0.824647	0.810655	0.645206	0.571497	1.11669	0.899468	0.766199	0.65631	0.553961	0.116687	0.0748213	-0.0444554	0.0111034	-0.0175362	0.14062	NO
P48634	Protein PRRC2A	PRRC2A	1110900	990810	1006800	796350	769900	1150800	969330	1046800	863060	829620	1.14694e+06	1.01919e+06	1.00519e+06	842743	816599	1	0.891898	0.906292	0.716851	0.693042	1.03244	0.917443	0.904847	0.758613	0.735078	0.0324427	0.0255447	-0.00144566	0.0417618	0.0420367	0.14034	NO
Q96ER3	Protein SAAL1	SAAL1	293780	245500	261550	195830	189490	304550	236690	269360	224220	200520	303529	248864	258654	218942	197373	1	0.835659	0.890292	0.666587	0.645006	1.03318	0.847111	0.880435	0.745258	0.671838	0.0331834	0.0114514	-0.00985755	0.0786703	0.026832	0.140279	NO
Q96IK1	Biorientation of chromosomes in cell division protein 1	BOD1	42474	42419	35397	30993	27129	48897	40811	36838	31223	27293	48733	42910.1	35373.8	30488	26864.6	1	0.998705	0.83338	0.729693	0.63872	1.14736	1.01027	0.832835	0.717804	0.632496	0.147361	0.0115628	-0.000545243	-0.0118897	-0.00622459	0.140264	NO
Q96SZ5	2-aminoethanethiol dioxygenase	ADO	181480	163090	158900	151870	131240	195630	179600	163410	140310	136420	194974	188838	156915	137007	134279	1	0.898667	0.875579	0.836842	0.723165	1.07435	1.04054	0.864641	0.754943	0.73991	0.0743548	0.141877	-0.0109371	-0.0818986	0.0167445	0.14014	NO
O95707	Ribonuclease P protein subunit p29	POP4	69941	63221	59441	43041	36926	72790	59937	62281	49531	39224	72545.9	63019.9	59805.6	48365	38608.4	1	0.903919	0.849873	0.61539	0.527959	1.03724	0.901043	0.855086	0.691512	0.552013	0.037244	-0.00287572	0.00521278	0.0761215	0.0240539	0.139756	NO
P17707	S-adenosylmethionine decarboxylase proenzyme;S-adenosylmethionine decarboxylase alpha chain;S-adenosylmethionine decarboxylase beta chain	AMD1	61450	54460	53741	42965	36219	64045	53320	57148	44163	40144	63830.2	56062.5	54876.6	43123.4	39513.9	1	0.886249	0.874548	0.699186	0.589406	1.03873	0.912327	0.893029	0.701764	0.643025	0.0387341	0.0260785	0.0184801	0.0025774	0.0536194	0.139489	NO
P57721	Poly(rC)-binding protein 3	PCBP3	115470	108090	101940	86858	79883	122610	102590	111430	88523	86183	122199	107867	107001	86439.1	84830.3	1	0.936087	0.882827	0.752213	0.691807	1.05827	0.934154	0.926657	0.748585	0.734652	0.0582732	-0.00193355	0.0438306	-0.00362756	0.0428449	0.139387	NO
P06132	Uroporphyrinogen decarboxylase	UROD	775010	708180	695060	631080	622010	854360	701330	709720	648340	645960	851495	737403	681512	633078	635821	1	0.913769	0.89684	0.814286	0.802583	1.09869	0.951475	0.879358	0.816864	0.820404	0.0986887	0.0377066	-0.0174816	0.00257772	0.0178207	0.139312	NO
Q9UKI8	Serine/threonine-protein kinase tousled-like 1	TLK1	176900	112990	56885	46227	31439	132920	92966	106420	68406	50636	132474	97747.7	102190	66795.7	49841.2	1	0.638722	0.321566	0.261317	0.177722	0.748865	0.552559	0.577672	0.37759	0.281748	-0.251135	-0.0861633	0.256107	0.116273	0.104026	0.139107	YES
Q9H974	Queuine tRNA-ribosyltransferase subunit QTRTD1	QTRTD1	311440	278420	279910	219380	212170	318990	273950	289150	241900	228390	317920	288041	277657	236206	224805	1	0.893976	0.898761	0.704405	0.681255	1.02081	0.924867	0.891528	0.75843	0.721825	0.0208072	0.0308909	-0.0072326	0.054025	0.0405704	0.139061	NO
Q9Y365	PCTP-like protein	STARD10	87303	88087	79130	62008	63083	87361	85951	85323	67237	67784	87068	90371.9	81931.8	65654.2	66720.1	1	1.00898	0.906384	0.710262	0.722575	0.997308	1.03515	0.938476	0.752027	0.764236	-0.00269159	0.0261721	0.0320924	0.041765	0.0416604	0.138998	NO
Q9Y223	Bifunctional UDP-N-acetylglucosamine 2-epimerase/N-acetylmannosamine kinase;UDP-N-acetylglucosamine 2-epimerase (hydrolyzing);N-acetylmannosamine kinase	GNE	658710	609640	269700	154100	143030	657050	562930	413900	151360	136730	654846	591884	397449	147797	134584	1	0.925506	0.409437	0.233942	0.217137	0.994135	0.898551	0.603375	0.224373	0.204314	-0.00586534	-0.0269551	0.193938	-0.00956884	-0.0128221	0.138727	NO
Q9Y3E2	BolA-like protein 1	BOLA1	23787	21979	19588	19882	17864	26113	20905	22456	19888	17686	26025.4	21980.3	21563.5	19419.8	17408.4	1	0.923992	0.823475	0.835835	0.750998	1.0941	0.924045	0.906523	0.816405	0.731845	0.0941028	5.26315e-05	0.0830482	-0.0194297	-0.0191531	0.138621	NO
Q9UPT8	Zinc finger CCCH domain-containing protein 4	ZC3H4	491620	439750	432900	330450	330280	497480	423610	455260	365230	363770	495812	445398	437165	356632	358060	1	0.894492	0.880558	0.672165	0.67182	1.00853	0.905981	0.889234	0.725423	0.728328	0.00852609	0.0114895	0.00867599	0.0532572	0.0565078	0.138457	NO
Q69YQ0	Cytospin-A	SPECC1L	85611	81155	68195	58970	53771	86338	77335	74569	67850	55187	86048.4	81312.7	71605.2	66252.8	54320.8	1	0.947951	0.796568	0.688813	0.628085	1.00511	0.949793	0.836402	0.773882	0.634507	0.00510971	0.00184249	0.0398335	0.0850683	0.00642208	0.138276	NO
Q9BZQ8	Protein Niban	FAM129A	104250	100120	60767	45909	35780	116620	89724	70962	46162	38051	116229	94339	68141.6	45075.3	37453.8	1	0.960384	0.582897	0.440374	0.343213	1.11491	0.90493	0.653636	0.432377	0.359269	0.114905	-0.0554535	0.0707391	-0.00799689	0.0160553	0.138249	NO
P49903	Selenide, water dikinase 1	SEPHS1	161810	152980	152890	126360	129400	169950	148330	150050	140060	141810	169380	155959	144086	136763	139584	1	0.94543	0.944874	0.780916	0.799703	1.04678	0.963843	0.890465	0.845207	0.862643	0.0467835	0.0184128	-0.0544087	0.064291	0.0629392	0.138018	NO
P02042	Hemoglobin subunit delta	HBD	150510	144980	126300	134590	111080	176110	147400	131840	126230	109560	175519	154982	126600	123258	107840	1	0.963258	0.839147	0.894226	0.738024	1.16616	1.02971	0.841139	0.818939	0.7165	0.166164	0.066451	0.00199258	-0.0752875	-0.0215243	0.137796	NO
Q9BYG5	Partitioning defective 6 homolog beta	PARD6B	65830	56732	45765	33530	24576	69935	53645	54412	34374	23960	69700.5	56404.2	52249.3	33564.8	23583.9	1	0.861796	0.6952	0.509342	0.373325	1.05879	0.856817	0.793701	0.509871	0.358255	0.0587947	-0.0049789	0.0985014	0.000528928	-0.0150702	0.137776	NO
Q9UKA9	Polypyrimidine tract-binding protein 2	PTBP2	46074	44719	42210	31137	29696	49450	44280	45563	34922	26892	49284.2	46557.5	43752.1	34099.9	26469.9	1	0.970591	0.916135	0.675804	0.644528	1.06967	1.0105	0.949604	0.740112	0.574509	0.069674	0.0399043	0.0334692	0.0643078	-0.0700197	0.137336	NO
Q7Z6J9	tRNA-splicing endonuclease subunit Sen54	TSEN54	232520	220450	202420	158760	153980	237430	214700	212920	176520	163340	236634	225743	204457	172365	160776	1	0.94809	0.870549	0.68278	0.662223	1.01769	0.970855	0.879311	0.741289	0.691451	0.0176919	0.0227642	0.00876186	0.0585095	0.0292287	0.136956	NO
P31949	Protein S100-A11;Protein S100-A11, N-terminally processed	S100A11	297520	280870	280070	227660	233540	311650	276740	270830	257960	250790	310605	290974	260066	251887	246854	1	0.944037	0.941348	0.765192	0.784956	1.04398	0.977999	0.874111	0.846624	0.829704	0.0439796	0.0339613	-0.0672371	0.0814315	0.0447488	0.136884	NO
P55263	Adenosine kinase	ADK	1147500	1033400	991630	763140	792510	1094300	1005700	998140	895590	918630	1.09063e+06	1.05743e+06	958468	874507	904211	1	0.900566	0.864166	0.665046	0.690641	0.95044	0.921506	0.835266	0.762098	0.787984	-0.0495599	0.0209397	-0.0288993	0.0970522	0.0973433	0.136876	NO
P32321	Deoxycytidylate deaminase	DCTD	194380	173080	177400	141200	148520	195710	172450	178480	158250	161430	195054	181320	171386	154525	158896	1	0.890421	0.912645	0.726412	0.76407	1.00347	0.932812	0.881707	0.794962	0.817452	0.00346561	0.0423912	-0.0309386	0.0685498	0.0533812	0.136849	NO
P29372	DNA-3-methyladenine glycosylase	MPG	130180	120800	118510	109660	97043	145800	115820	127460	105830	102730	145311	121777	122394	103339	101118	1	0.927946	0.910355	0.842372	0.745452	1.11623	0.935453	0.94019	0.793814	0.776752	0.116232	0.00750668	0.0298355	-0.0485581	0.0312996	0.136315	NO
Q15005	Signal peptidase complex subunit 2	SPCS2	18244	18287	9848.7	3575.9	3396.3	16412	16720	15722	4318.8	2628.6	16357	17580	15097.1	4217.13	2587.34	1	1.00236	0.539832	0.196004	0.18616	0.896566	0.963604	0.827511	0.231152	0.141819	-0.103434	-0.0387527	0.287679	0.0351476	-0.044341	0.136299	NO
Q76I76	Protein phosphatase Slingshot homolog 2	SSH2	33843	27783	27793	23760	21693	35247	28260	27863	24638	24185	35128.8	29713.6	26755.6	24058	23805.4	1	0.820938	0.821233	0.702065	0.640989	1.03799	0.877982	0.790579	0.710871	0.703407	0.0379928	0.0570445	-0.0306545	0.00880565	0.0624176	0.135606	NO
Q14684	Ribosomal RNA processing protein 1 homolog B	RRP1B	194970	170390	173020	139140	140230	197640	162990	181930	151670	155440	196977	171373	174699	148100	153000	1	0.873929	0.887419	0.713648	0.719239	1.01029	0.878973	0.89603	0.759602	0.784737	0.0102948	0.00504394	0.00861175	0.0459538	0.0654986	0.135403	NO
Q5THK1	Protein PRR14L	PRR14L	84081	75202	76160	64311	58038	88404	72190	78410	65731	66735	88107.5	75903.1	75293.5	64183.7	65687.5	1	0.894399	0.905793	0.76487	0.690263	1.04789	0.902738	0.895488	0.763355	0.781241	0.0478886	0.00833843	-0.0103052	-0.00151449	0.0909783	0.135386	NO
P84085	ADP-ribosylation factor 5	ARF5	167850	140140	142630	92146	85479	157080	143180	145110	113630	95029	156553	150544	139342	110955	93537.5	1	0.834912	0.849747	0.548978	0.509258	0.932697	0.896899	0.830161	0.661037	0.557268	-0.067303	0.0619868	-0.0195861	0.112059	0.0480098	0.135167	NO
Q9H6F5	Coiled-coil domain-containing protein 86	CCDC86	144750	138420	141820	136710	115300	166700	133060	142450	125780	133000	166141	139904	136788	122819	130912	1	0.956269	0.979758	0.944456	0.796546	1.14778	0.966521	0.944996	0.848491	0.904404	0.147778	0.0102519	-0.034762	-0.0959649	0.107858	0.135162	NO
P46821	Microtubule-associated protein 1B;MAP1B heavy chain;MAP1 light chain LC1	MAP1B	716610	654030	661850	544840	523100	754550	639060	668420	588550	565490	752019	671930	641853	574695	556614	1	0.912672	0.923585	0.760302	0.729965	1.04941	0.937651	0.89568	0.801964	0.776732	0.0494124	0.0249789	-0.0279049	0.0416618	0.0467677	0.134916	NO
Q15004	PCNA-associated factor	KIAA0101	36295	33763	32155	27145	24664	39893	32590	31812	27763	27667	39759.2	34266.3	30547.6	27109.4	27232.7	1	0.930238	0.885935	0.747899	0.679543	1.09545	0.944104	0.841648	0.74692	0.750317	0.0954459	0.0138661	-0.044287	-0.000979598	0.0707741	0.13482	NO
O75575	DNA-directed RNA polymerase III subunit RPC9	CRCP	7375.7	6720.3	6971.7	6402.2	4665.7	7738.4	7170.7	6563.2	5781.9	6023.4	7712.45	7539.53	6302.34	5645.79	5928.86	1	0.911141	0.945226	0.868013	0.632577	1.04566	1.02221	0.854473	0.765458	0.803837	0.0456564	0.111071	-0.0907521	-0.102554	0.171259	0.134681	NO
Q16875	6-phosphofructo-2-kinase/fructose-2,6-bisphosphatase 3;6-phosphofructo-2-kinase;Fructose-2,6-bisphosphatase	PFKFB3	123070	108330	104700	90569	73646	135650	108740	109740	88313	76957	135195	114333	105378	86234.1	75749.1	1	0.880231	0.850735	0.735915	0.598407	1.09852	0.929008	0.856247	0.700691	0.615496	0.0985217	0.0487776	0.00551139	-0.0352233	0.0170887	0.134676	NO
Q5JRA6	Melanoma inhibitory activity protein 3	MIA3	139170	126560	127940	104110	96869	150850	123700	131330	111650	99373	150344	130063	126110	109022	97813.3	1	0.909391	0.919307	0.748078	0.696048	1.08029	0.934559	0.906159	0.783371	0.702833	0.080291	0.0251673	-0.0131481	0.0352928	0.00678501	0.134388	NO
O75821	Eukaryotic translation initiation factor 3 subunit G	EIF3G	730940	657090	572590	411820	381950	827490	595920	586000	473440	382190	824715	626571	562709	462295	376191	1	0.898966	0.783361	0.563411	0.522546	1.12829	0.857213	0.769843	0.632466	0.514668	0.128293	-0.0417528	-0.0135183	0.0690549	-0.00787855	0.134199	NO
P54578	Ubiquitin carboxyl-terminal hydrolase 14	USP14	2549600	2180900	2305800	1742400	1905800	2680200	2102700	2234100	2080200	1999300	2.67121e+06	2.21085e+06	2.1453e+06	2.03123e+06	1.96792e+06	1	0.855389	0.904377	0.683401	0.74749	1.0477	0.867137	0.841428	0.796686	0.771854	0.0476982	0.011748	-0.0629496	0.113285	0.0243644	0.134146	NO
P19474	E3 ubiquitin-protein ligase TRIM21	TRIM21	62347	58909	56857	53529	41077	67855	58998	60408	52358	42963	67627.4	62032.6	58007	51125.5	42288.7	1	0.944857	0.911944	0.858566	0.658845	1.08469	0.994957	0.93039	0.820015	0.678279	0.0846943	0.0500998	0.0184457	-0.0385509	0.0194342	0.134123	NO
Q53F19	Uncharacterized protein C17orf85	C17orf85	22548	19216	16144	12051	9356.3	24160	16907	18391	13102	10186	24079	17776.6	17660	12793.6	10026.1	1	0.852226	0.715984	0.53446	0.41495	1.0679	0.78839	0.78322	0.567393	0.444657	0.0678985	-0.0638365	0.0672358	0.032933	0.0297066	0.133937	NO
O75152	Zinc finger CCCH domain-containing protein 11A	ZC3H11A	370320	333470	313270	249670	231480	373340	313640	317540	273780	278010	372088	329772	304919	267335	273646	1	0.900491	0.845944	0.674201	0.625081	1.00477	0.890506	0.823394	0.721903	0.738946	0.00477404	-0.00998563	-0.0225505	0.0477022	0.113865	0.133805	NO
Q8WXE1	ATR-interacting protein	ATRIP	44766	42625	37782	30824	30243	53902	39782	38821	33338	27275	53721.2	41828.2	37278	32553.2	26846.9	1	0.952174	0.843989	0.688558	0.67558	1.20005	0.934374	0.832731	0.727186	0.599716	0.200045	-0.0177994	-0.011258	0.0386277	-0.0758634	0.133752	NO
O00560	Syntenin-1	SDCBP	28590	24823	23009	21076	18443	31151	23491	24420	22321	19073	31046.5	24699.3	23449.4	21795.6	18773.6	1	0.868241	0.804792	0.737181	0.645086	1.08592	0.863913	0.820196	0.762349	0.65665	0.0859226	-0.00432797	0.0154042	0.025168	0.0115647	0.133732	NO
Q7Z4G4	tRNA (guanine(10)-N2)-methyltransferase homolog	TRMT11	48458	41506	38807	27635	21675	59465	40660	36614	27670	20685	59265.6	42751.4	35158.7	27018.6	20360.3	1	0.856536	0.800838	0.570288	0.447295	1.22303	0.882235	0.725551	0.557568	0.420165	0.22303	0.0256996	-0.075287	-0.0127196	-0.02713	0.133593	NO
Q92845	Kinesin-associated protein 3	KIFAP3	95033	75629	60665	45978	36713	101420	73233	64001	44946	43972	101080	76999.8	61457.2	43887.9	43281.8	1	0.795818	0.638357	0.483811	0.386318	1.06363	0.810242	0.646694	0.461818	0.45544	0.0636291	0.0144239	0.0083363	-0.0219929	0.0691215	0.133518	NO
Q9NQR4	Omega-amidase NIT2	NIT2	599860	528910	518190	426330	412510	615640	518090	541630	459070	446210	613575	544738	520102	448263	439206	1	0.881722	0.863852	0.710716	0.687677	1.02286	0.908109	0.86704	0.74728	0.732182	0.0228642	0.0263862	0.00318814	0.036564	0.0445044	0.133507	NO
P09104	Gamma-enolase	ENO2	375700	342530	330050	264630	274840	382310	330060	335090	296410	303380	381028	347037	321772	289432	298618	1	0.911711	0.878493	0.704365	0.731541	1.01418	0.923707	0.856459	0.770382	0.794832	0.0141811	0.0119954	-0.0220347	0.0660164	0.0632905	0.133449	NO
O95716	Ras-related protein Rab-3D	RAB3D	58623	53765	53596	42013	43275	60597	49471	54653	51831	44287	60393.8	52015.5	52480.8	50610.9	43591.9	1	0.917132	0.914249	0.716664	0.738191	1.03021	0.887289	0.895225	0.863328	0.743597	0.0302061	-0.0298424	-0.0190238	0.146664	0.00540545	0.133409	NO
Q14145	Kelch-like ECH-associated protein 1	KEAP1	299300	280540	242260	180250	155260	294210	273340	253780	204170	176600	293223	287399	243693	199364	173828	1	0.93732	0.809422	0.602239	0.518744	0.979697	0.960238	0.814211	0.6661	0.580782	-0.020303	0.0229178	0.00478881	0.0638615	0.0620385	0.133304	NO
Q9HBM1	Kinetochore protein Spc25	SPC25	309710	269370	252320	186870	190440	319350	268650	252800	215210	199390	318279	282468	242752	210144	196260	1	0.869749	0.814698	0.603371	0.614898	1.02767	0.91204	0.783805	0.678518	0.633691	0.0276678	0.0422914	-0.0308926	0.0751472	0.0187932	0.133007	NO
P78332	RNA-binding protein 6	RBM6	402810	352280	321520	271420	246130	440740	342660	331960	282950	256970	439262	360285	318766	276289	252937	1	0.874556	0.798193	0.673816	0.611032	1.09049	0.894429	0.791356	0.685905	0.62793	0.090494	0.0198723	-0.00683707	0.0120881	0.016898	0.132515	NO
Q9BZE2	tRNA pseudouridine(38/39) synthase	PUS3	299480	258850	273150	225310	222450	332040	254760	267540	247580	224980	330926	267864	256906	241752	221449	1	0.864332	0.912081	0.752337	0.742787	1.105	0.894429	0.857842	0.807239	0.739444	0.105003	0.0300976	-0.0542394	0.0549013	-0.0033432	0.13242	NO
O00442	RNA 3-terminal phosphate cyclase	RTCA	498860	439770	455890	337240	308950	519610	418840	478590	376280	326610	517867	440383	459568	367422	321484	1	0.88155	0.913864	0.676021	0.619312	1.0381	0.882779	0.921236	0.736524	0.644437	0.0381016	0.001229	0.00737285	0.0605023	0.0251245	0.13233	NO
Q9P000	COMM domain-containing protein 9	COMMD9	111460	111170	87268	58419	45744	123640	109840	92288	57464	46075	123225	115490	88619.9	56111.3	45351.8	1	0.997398	0.782954	0.524125	0.410407	1.10556	1.03615	0.795083	0.503421	0.406889	0.105557	0.038755	0.0121293	-0.0207046	-0.00351857	0.132218	NO
O14526	F-BAR domain only protein 1	FCHO1	167990	155500	146910	113320	94164	172990	147360	153530	121910	107960	172410	154939	147428	119040	106265	1	0.92565	0.874516	0.674564	0.560533	1.02631	0.922314	0.877599	0.708615	0.63257	0.0263101	-0.0033366	0.00308242	0.0340507	0.072037	0.132144	NO
P62258	14-3-3 protein epsilon	YWHAE	2799900	2509800	2579100	2079900	2103100	2986900	2474800	2607100	2293500	2153000	2.97688e+06	2.60209e+06	2.50348e+06	2.23951e+06	2.11921e+06	1	0.896389	0.92114	0.742848	0.751134	1.06321	0.929352	0.894131	0.799854	0.756887	0.0632104	0.0329625	-0.0270086	0.0570056	0.00575275	0.131923	NO
Q01518	Adenylyl cyclase-associated protein 1	CAP1	1740200	1538200	1585900	1263700	1359500	1855200	1509400	1534400	1423300	1439600	1.84898e+06	1.58704e+06	1.47341e+06	1.38979e+06	1.417e+06	1	0.883921	0.911332	0.726181	0.781232	1.06251	0.911985	0.846692	0.798641	0.814277	0.062509	0.0280636	-0.0646397	0.07246	0.0330447	0.131438	NO
Q96L91	E1A-binding protein p400	EP400	99351	97540	87001	74462	68530	107420	89506	92110	79282	74057	107060	94109.8	88449	77415.7	72894.6	1	0.981772	0.875693	0.749484	0.689777	1.07759	0.947245	0.890268	0.779214	0.733708	0.077591	-0.0345265	0.0145747	0.0297296	0.0439313	0.1313	NO
Q9NZJ0	Denticleless protein homolog	DTL	59202	54124	52352	42495	39924	57091	54378	54415	45906	45418	56899.5	57174.9	52252.2	44825.4	44705.1	1	0.914226	0.884294	0.717797	0.674369	0.961108	0.96576	0.882609	0.757159	0.755129	-0.0388917	0.0515344	-0.00168528	0.0393627	0.0807596	0.13108	NO
P10746	Uroporphyrinogen-III synthase	UROS	128120	118460	110990	86803	75636	128160	119700	121750	95848	73840	127730	125857	116911	93591.7	72681	1	0.924602	0.866297	0.677513	0.590353	0.996957	0.982335	0.912511	0.7305	0.567289	-0.00304255	0.0577333	0.046214	0.052987	-0.0230641	0.130828	NO
Q9Y696	Chloride intracellular channel protein 4	CLIC4	501510	450530	441800	366510	320480	525440	434110	469530	387330	342620	523678	456439	450868	378212	337242	1	0.898347	0.88094	0.730813	0.63903	1.0442	0.910128	0.899021	0.754147	0.672454	0.0442022	0.0117815	0.0180816	0.0233337	0.0334237	0.130823	NO
O00754	Lysosomal alpha-mannosidase;Lysosomal alpha-mannosidase A peptide;Lysosomal alpha-mannosidase B peptide;Lysosomal alpha-mannosidase C peptide;Lysosomal alpha-mannosidase D peptide;Lysosomal alpha-mannosidase E peptide	MAN2B1	244110	236670	217510	190200	179920	247920	229950	225410	198670	204220	247089	241778	216451	193993	201015	1	0.969522	0.891033	0.779157	0.737045	1.0122	0.990445	0.886694	0.794696	0.823459	0.0122017	0.020923	-0.00433869	0.0155389	0.0864144	0.130739	NO
Q9HC44	Vasculin-like protein 1	GPBP1L1	4045.7	3521.4	2616.6	2349.3	2182.4	3202.2	3095.2	3641.4	2771.1	2637.2	3191.46	3254.4	3496.67	2705.87	2595.81	1	0.870406	0.646761	0.580691	0.539437	0.788853	0.80441	0.864293	0.668825	0.641621	-0.211147	-0.0659955	0.217532	0.0881348	0.102184	0.130708	NO
Q9NXV6	CDKN2A-interacting protein	CDKN2AIP	546060	500350	501780	390090	377960	542240	484520	517920	426750	430420	540421	509441	497335	416704	423664	1	0.916291	0.91891	0.714372	0.692158	0.989674	0.93294	0.91077	0.76311	0.775857	-0.0103258	0.016649	-0.00814047	0.0487384	0.0836982	0.130619	NO
Q9UL25	Ras-related protein Rab-21	RAB21	176490	159210	163630	122580	120250	181210	154640	165770	135960	132130	180602	162594	159181	132759	130056	1	0.902091	0.927135	0.694544	0.681342	1.0233	0.921264	0.901928	0.752221	0.736904	0.0233003	0.0191735	-0.0252064	0.0576771	0.0555619	0.130507	NO
Q9NTJ4	Alpha-mannosidase 2C1	MAN2C1	58489	51071	46466	37289	37740	59065	50587	47171	44059	38918	58866.9	53189	45296.1	43021.8	38307.2	1	0.873173	0.79444	0.637539	0.64525	1.00646	0.909384	0.774439	0.735554	0.654946	0.00646126	0.0362111	-0.0200012	0.0980155	0.00969677	0.130383	NO
Q5TKA1	Protein lin-9 homolog	LIN9	93304	89137	80747	68649	61475	99086	85458	87269	73173	62588	98753.7	89853.5	83800.4	71450.5	61605.6	1	0.95534	0.865418	0.735756	0.658868	1.05841	0.963019	0.898144	0.765781	0.660268	0.0584079	0.00767969	0.0327255	0.0300252	0.00140012	0.130238	NO
O00443	Phosphatidylinositol 4-phosphate 3-kinase C2 domain-containing subunit alpha	PIK3C2A	34065	29531	31005	24990	24503	34661	28281	32553	27668	26388	34544.8	29735.6	31259.2	27016.7	25973.8	1	0.866902	0.910172	0.733598	0.719301	1.01408	0.872909	0.917633	0.793092	0.762478	0.0140836	0.00600727	0.00746081	0.0594945	0.0431769	0.130223	NO
Q9Y4G8	Rap guanine nucleotide exchange factor 2	RAPGEF2	120690	111400	99599	79427	67377	129490	110620	113060	81178	61954	129056	116310	108566	79267	60981.6	1	0.923026	0.825246	0.658108	0.558265	1.06932	0.963707	0.899547	0.656782	0.505275	0.0693158	0.0406807	0.0743005	-0.00132546	-0.0529904	0.129981	NO
Q96B01	RAD51-associated protein 1	RAD51AP1	14534	14087	12761	10516	10336	15702	11984	13883	12728	10273	15649.3	12600.4	13331.2	12428.4	10111.8	1	0.969245	0.87801	0.723545	0.71116	1.07674	0.86696	0.917243	0.855124	0.695731	0.0767401	-0.102284	0.0392327	0.13158	-0.0154288	0.129839	NO
Q96FX7	tRNA (adenine(58)-N(1))-methyltransferase catalytic subunit TRMT61A	TRMT61A	97794	88007	75271	61010	60784	101230	84437	77543	68528	65521	100891	88780	74461	66914.8	64492.6	1	0.899922	0.769689	0.623862	0.621551	1.03166	0.907827	0.761406	0.684243	0.659474	0.0316635	0.00790468	-0.00828287	0.0603802	0.0379226	0.129588	NO
Q9UKB3	DnaJ homolog subfamily C member 12	DNAJC12	186750	177710	159280	138500	130470	192620	176630	170150	143660	137690	191974	185715	163387	140278	135529	1	0.951593	0.852905	0.741633	0.698635	1.02797	0.994458	0.874898	0.751155	0.725723	0.0279733	0.0428647	0.0219932	0.00952168	0.0270889	0.129442	NO
O60888	Protein CutA	CUTA	309080	264190	280120	229080	251470	350610	246430	261130	260620	264310	349434	259105	250751	254485	260161	1	0.854763	0.906303	0.741167	0.813608	1.13056	0.838311	0.811282	0.823362	0.841729	0.130562	-0.0164515	-0.0950202	0.0821952	0.0281204	0.129406	NO
Q9P013	Spliceosome-associated protein CWC15 homolog	CWC15	245780	228430	227910	177040	183690	253160	227330	222560	198260	199130	252311	239023	213714	193593	196005	1	0.929408	0.927293	0.720319	0.747376	1.02657	0.972507	0.869534	0.787667	0.79748	0.0265724	0.0430985	-0.0577583	0.0673483	0.0501038	0.129365	NO
P55789	FAD-linked sulfhydryl oxidase ALR	GFER	37774	32367	34482	26687	28104	39657	29711	35655	31396	29099	39524	31239.2	34237.9	30656.9	28642.3	1	0.856859	0.91285	0.706491	0.744004	1.04633	0.827002	0.906387	0.811588	0.758254	0.0463282	-0.0298568	-0.00646316	0.105097	0.0142498	0.129355	NO
P00338	L-lactate dehydrogenase A chain	LDHA	2996600	2794900	2715700	2211000	2227800	3203500	2720500	2703400	2423900	2354100	3.19276e+06	2.86043e+06	2.59595e+06	2.36684e+06	2.31715e+06	1	0.93269	0.90626	0.737836	0.743443	1.06546	0.954558	0.866299	0.789842	0.77326	0.0654596	0.0218679	-0.0399616	0.0520057	0.0298174	0.129189	NO
Q86U90	YrdC domain-containing protein, mitochondrial	YRDC	266420	235260	231180	185860	184960	269860	225020	237500	210330	202220	268955	236594	228060	205379	199046	1	0.883042	0.867728	0.69762	0.694242	1.00951	0.888049	0.856018	0.770883	0.747114	0.00951493	0.0050069	-0.0117095	0.073263	0.0528715	0.128947	NO
P80303	Nucleobindin-2;Nesfatin-1	NUCB2	403680	351060	356980	272070	254550	400700	338860	391500	303290	266680	399356	356289	375939	296150	262494	1	0.869649	0.884314	0.673974	0.630574	0.989289	0.882603	0.931281	0.733627	0.650253	-0.010711	0.0129541	0.0469666	0.0596522	0.0196796	0.128542	NO
Q9Y3L3	SH3 domain-binding protein 1	SH3BP1	591840	540740	519240	435680	405050	654770	513050	541250	464860	409380	652574	539439	519738	453917	402954	1	0.913659	0.877332	0.736145	0.684391	1.10262	0.911461	0.878172	0.766959	0.68085	0.102619	-0.00219856	0.000840672	0.030814	-0.00354067	0.128535	NO
Q5ST30	Valine--tRNA ligase, mitochondrial	VARS2	45924	36677	19020	10342	12309	43020	37004	25888	12885	11101	42875.7	38907.3	24859.1	12581.7	10926.8	1	0.798646	0.414163	0.225198	0.26803	0.933623	0.847211	0.541309	0.273967	0.237931	-0.0663766	0.0485652	0.127146	0.0487693	-0.0300984	0.128006	NO
Q8TDY4	Arf-GAP with SH3 domain, ANK repeat and PH domain-containing protein 3	ASAP3	26827	24218	23059	20161	16486	30017	25098	24803	17523	17219	29916.3	26388.9	23817.2	17110.5	16948.7	1	0.902747	0.859544	0.751519	0.61453	1.11516	0.98367	0.887806	0.637809	0.631779	0.115158	0.0809229	0.0282619	-0.11371	0.0172489	0.127881	NO
O60499	Syntaxin-10	STX10	65488	59878	59314	49657	42925	72370	55429	60877	52782	45949	72127.3	58280	58457.4	51539.5	45227.8	1	0.914335	0.905723	0.758261	0.655464	1.10138	0.889934	0.892643	0.787007	0.690627	0.101382	-0.0244014	-0.0130804	0.0287455	0.0351637	0.127809	NO
O14974	Protein phosphatase 1 regulatory subunit 12A	PPP1R12A	1546600	1317500	1296400	913670	848850	1578700	1307300	1333900	1046100	883850	1.57341e+06	1.37454e+06	1.28088e+06	1.02147e+06	869977	1	0.851869	0.838226	0.59076	0.548849	1.01733	0.88875	0.828193	0.660464	0.56251	0.0173319	0.0368817	-0.010033	0.0697041	0.0136605	0.127545	NO
Q15691	Microtubule-associated protein RP/EB family member 1	MAPRE1	647890	610810	590460	478580	515260	691970	592940	591200	528800	536870	689649	623438	567702	516352	528443	1	0.942768	0.911358	0.738675	0.795289	1.06445	0.962259	0.876232	0.796974	0.815638	0.0644544	0.0194909	-0.035126	0.0582997	0.0203483	0.127467	NO
P05937	Calbindin	CALB1	567780	522560	526880	430910	463190	573590	523340	522210	493080	486460	571666	550258	501454	481473	478825	1	0.920356	0.927965	0.758938	0.815791	1.00684	0.96914	0.883184	0.847992	0.843328	0.0068448	0.0487831	-0.0447809	0.0890533	0.0275365	0.127437	NO
Q96PE7	Methylmalonyl-CoA epimerase, mitochondrial	MCEE	23821	21377	22840	19562	17489	25851	21504	23124	19383	18904	25764.3	22610.1	22204.9	18926.7	18607.3	1	0.897401	0.958818	0.821208	0.734184	1.08158	0.949165	0.932157	0.794539	0.78113	0.0815794	0.0517636	-0.0266607	-0.0266691	0.0469455	0.126959	NO
Q9UNF0	Protein kinase C and casein kinase substrate in neurons protein 2	PACSIN2	708880	663970	639530	525910	508030	742810	639980	670020	561040	540360	740319	672897	643389	547833	531879	1	0.936647	0.90217	0.741889	0.716666	1.04435	0.94924	0.907614	0.772815	0.750308	0.04435	0.0125938	0.00544446	0.030926	0.0336427	0.126957	NO
O15379	Histone deacetylase 3	HDAC3	288850	252310	241950	182070	157810	301120	236000	254160	208250	166540	300110	248139	244058	203348	163926	1	0.873498	0.837632	0.630327	0.546339	1.03898	0.859057	0.844931	0.703991	0.567513	0.0389826	-0.0144411	0.00729855	0.0736635	0.0211737	0.126677	NO
Q9GZV4	Eukaryotic translation initiation factor 5A-2	EIF5A2	48810	39503	28526	17795	12521	53343	37972	33235	17646	11274	53164.1	39925.1	31914	17230.6	11097	1	0.809322	0.584429	0.364577	0.256525	1.08921	0.81797	0.653842	0.353014	0.227352	0.0892051	0.00864773	0.0694129	-0.0115631	-0.0291734	0.126529	NO
Q16543	Hsp90 co-chaperone Cdc37;Hsp90 co-chaperone Cdc37, N-terminally processed	CDC37	1394600	1257800	1277600	1009500	1058000	1437600	1243300	1279500	1131900	1117500	1.43278e+06	1.30725e+06	1.22865e+06	1.10525e+06	1.09996e+06	1	0.901907	0.916105	0.723863	0.75864	1.02738	0.937365	0.881002	0.792524	0.788728	0.0273761	0.0354577	-0.0351031	0.0686609	0.0300875	0.126479	NO
Q9UKG1	DCC-interacting protein 13-alpha	APPL1	652590	616830	589090	486150	458680	649990	628650	609750	504760	506600	647810	660985	585515	492878	498649	1	0.945203	0.902695	0.744955	0.702861	0.992676	1.01286	0.897217	0.755264	0.764107	-0.00732448	0.0676607	-0.00547825	0.0103092	0.061246	0.126413	NO
Q9NUU7	ATP-dependent RNA helicase DDX19A	DDX19A	1512600	1310500	1393400	1044100	1051700	1546000	1291400	1392300	1195700	1117900	1.54082e+06	1.35782e+06	1.33696e+06	1.16755e+06	1.10035e+06	1	0.866389	0.921195	0.690268	0.695293	1.01865	0.897675	0.883883	0.771885	0.727459	0.0186534	0.0312861	-0.037312	0.0816162	0.0321656	0.126409	NO
Q8NBF6	Late secretory pathway protein AVL9 homolog	AVL9	280620	243950	230340	179400	165970	301850	226470	241860	190300	181570	300838	238119	232247	185820	178720	1	0.869325	0.820825	0.639299	0.59144	1.07205	0.848544	0.827621	0.662177	0.636876	0.0720465	-0.0207807	0.00679589	0.0228788	0.0454356	0.126376	NO
Q9NQL2	Ras-related GTP-binding protein D	RRAGD	20008	16923	17813	13151	11931	20140	16372	19409	13263	13690	20072.5	17214.1	18637.6	12950.8	13475.1	1	0.845812	0.890294	0.657287	0.596311	1.00322	0.860361	0.931506	0.64728	0.673487	0.00322152	0.014549	0.0412121	-0.0100069	0.0771754	0.126151	NO
Q9H8Y8	Golgi reassembly-stacking protein 2	GORASP2	648480	617630	538440	374740	360910	667600	580400	551350	462550	370990	665361	610253	529436	451661	365167	1	0.952427	0.830311	0.577874	0.556548	1.02603	0.941051	0.816426	0.696492	0.563112	0.0260317	-0.0113759	-0.0138846	0.118618	0.00656465	0.125954	NO
Q969Q5	Ras-related protein Rab-24	RAB24	49345	40391	34998	24720	21702	48426	40533	38626	28546	21867	48263.6	42617.8	37090.8	27874	21523.8	1	0.818543	0.709251	0.500963	0.439801	0.978085	0.863671	0.751662	0.56488	0.43619	-0.0219152	0.0451276	0.0424111	0.0639176	-0.00361168	0.125929	NO
P00558	Phosphoglycerate kinase 1	PGK1	5068700	4459300	4574100	3604700	3822000	5233500	4349500	4565900	4096700	4056900	5.21595e+06	4.57322e+06	4.38442e+06	4.00026e+06	3.99322e+06	1	0.879772	0.902421	0.711169	0.754039	1.02905	0.902247	0.865	0.789209	0.78782	0.0290505	0.0224746	-0.037421	0.0780401	0.0337807	0.125925	NO
O15062	Zinc finger and BTB domain-containing protein 5	ZBTB5	14312	12355	12970	9854.5	9500.2	14432	12650	12800	10439	10791	14383.6	13300.7	12291.3	10193.3	10621.6	1	0.863262	0.906233	0.688548	0.663793	1.005	0.929336	0.858807	0.712218	0.742148	0.00500274	0.0660743	-0.047425	0.0236697	0.0783558	0.125677	NO
Q6WKZ4	Rab11 family-interacting protein 1	RAB11FIP1	351950	303990	300470	247270	232310	376460	284110	315880	270460	242640	375197	298723	303325	264093	238832	1	0.863731	0.853729	0.702571	0.660065	1.06605	0.848766	0.861841	0.750371	0.678595	0.0660533	-0.0149645	0.00811215	0.0478001	0.0185299	0.125531	NO
Q02952	A-kinase anchor protein 12	AKAP12	39308	35806	38597	34380	30666	43220	36889	36128	34360	34122	43075.1	38786.4	34692.1	33551.1	33586.4	1	0.910909	0.981912	0.874631	0.780147	1.09583	0.98673	0.88257	0.853545	0.854443	0.0958342	0.0758215	-0.0993421	-0.0210861	0.0742961	0.125524	NO
P62256	Ubiquitin-conjugating enzyme E2 H	UBE2H	186280	164950	161830	116730	113870	178320	162040	164010	141380	125310	177722	170375	157491	138052	123343	1	0.885495	0.868746	0.626637	0.611284	0.954058	0.914615	0.845455	0.741099	0.662139	-0.0459418	0.0291204	-0.0232914	0.114461	0.0508545	0.125203	NO
Q8NI08	Nuclear receptor coactivator 7	NCOA7	11632	12321	11465	10117	8490	14612	11607	11588	9600.5	8343.2	14563	12204	11127.4	9374.5	8212.25	1	1.05923	0.985643	0.869756	0.729883	1.25198	1.04918	0.956622	0.805923	0.706005	0.251977	-0.0100578	-0.0290213	-0.0638326	-0.0238783	0.125187	NO
Q53FA7	Quinone oxidoreductase PIG3	TP53I3	123980	112390	118050	95889	91826	125810	112640	112090	104300	106000	125388	118434	107635	101845	104336	1	0.906517	0.95217	0.773423	0.740652	1.01136	0.955264	0.868163	0.821461	0.841557	0.0113572	0.048747	-0.0840064	0.0480378	0.100905	0.125041	NO
O43776	Asparagine--tRNA ligase, cytoplasmic	NARS	1228800	1205200	1214800	915190	953350	1214700	1159200	1249000	1028100	1054700	1.21063e+06	1.21882e+06	1.19936e+06	1.0039e+06	1.03815e+06	1	0.980794	0.988607	0.744784	0.775838	0.98521	0.991881	0.97604	0.816974	0.844845	-0.0147898	0.0110869	-0.0125672	0.0721908	0.0690069	0.124928	NO
Q9BRT2	Ubiquinol-cytochrome-c reductase complex assembly factor 2	UQCC2	47670	40843	37476	25279	24856	51537	36818	40209	30112	24370	51364.2	38711.7	38610.9	29403.1	23987.5	1	0.856786	0.786155	0.530292	0.521418	1.07749	0.812078	0.809961	0.616806	0.503199	0.0774944	-0.0447086	0.0238065	0.0865146	-0.0182191	0.124888	NO
Q15650	Activating signal cointegrator 1	TRIP4	99448	77128	66892	46899	42675	111800	71601	68235	51327	43785	111425	75283.8	65522.9	50118.7	43097.8	1	0.775561	0.672633	0.471593	0.429119	1.12044	0.757017	0.658866	0.503969	0.43337	0.120435	-0.0185443	-0.0137666	0.0323761	0.0042511	0.124752	NO
Q86U28	Iron-sulfur cluster assembly 2 homolog, mitochondrial	ISCA2	55407	50354	51618	43160	43672	55307	52108	51087	47595	46410	55121.5	54788.2	49056.5	46474.6	45681.6	1	0.908802	0.931615	0.778963	0.788204	0.994848	0.988831	0.885385	0.838786	0.824473	-0.00515249	0.0800293	-0.0462306	0.0598226	0.0362691	0.124738	NO
Q5T3J3	Ligand-dependent nuclear receptor-interacting factor 1	LRIF1	30998	33199	27205	27420	26838	39197	30062	28895	25923	26198	39065.5	31608.2	27746.5	25312.8	25786.8	1	1.071	0.877637	0.884573	0.865798	1.26026	1.01969	0.895108	0.816593	0.831886	0.26026	-0.051318	0.0174703	-0.0679799	-0.0339117	0.124521	NO
P20073	Annexin A7	ANXA7	943800	856490	876690	718470	730370	947170	857260	879940	783500	800510	943993	901353	844966	765056	787945	1	0.907491	0.928894	0.761252	0.773861	1.0002	0.955026	0.895281	0.810612	0.834865	0.000204982	0.0475348	-0.033613	0.0493601	0.0610038	0.124491	NO
O95429	BAG family molecular chaperone regulator 4	BAG4	133500	123880	122460	103410	100480	140280	122040	123990	107010	110380	139810	128317	119062	104491	108648	1	0.92794	0.917303	0.774607	0.752659	1.04726	0.961177	0.89185	0.782704	0.813839	0.0472625	0.0332371	-0.0254539	0.00809687	0.0611798	0.124322	NO
P62993	Growth factor receptor-bound protein 2	GRB2	782310	706610	700830	573860	583580	792790	690220	710530	625300	645810	790131	725722	682289	610580	635674	1	0.903235	0.895847	0.733546	0.74597	1.01	0.927665	0.872147	0.780484	0.81256	0.00999758	0.0244297	-0.0236999	0.0469381	0.0665894	0.124255	NO
Q6ULP2	Aftiphilin	AFTPH	180190	166550	149190	114910	103650	191940	157410	158200	125600	107130	191296	165506	151912	122643	105449	1	0.924302	0.827959	0.637716	0.575226	1.06164	0.918511	0.843067	0.680633	0.585207	0.0616365	-0.00579162	0.0151074	0.0429176	0.00998123	0.123851	NO
P32121	Beta-arrestin-2	ARRB2	40196	35321	31389	22462	17685	40365	35294	36997	22646	17324	40229.6	37109.4	35526.5	22112.9	17052.1	1	0.878719	0.780899	0.558812	0.439969	1.00084	0.92321	0.883832	0.550127	0.424223	0.000836583	0.0444908	0.102934	-0.00868489	-0.0157457	0.123831	NO
P30043	Flavin reductase (NADPH)	BLVRB	937970	876480	859760	677000	572200	1031100	847460	854490	757880	568860	1.02764e+06	891049	820528	740039	559931	1	0.934444	0.916618	0.721771	0.610041	1.0956	0.949976	0.874791	0.78898	0.596961	0.0956022	0.0155327	-0.041827	0.0672081	-0.01308	0.123436	NO
Q13362	Serine/threonine-protein phosphatase 2A 56 kDa regulatory subunit gamma isoform	PPP2R5C	115330	111740	89685	64985	52506	129520	105010	97470	67017	50703	129086	110411	93596	65439.4	49907.2	1	0.968872	0.777638	0.56347	0.455267	1.11927	0.95735	0.811549	0.56741	0.432734	0.119272	-0.0115217	0.0339111	0.00393989	-0.0225338	0.123067	NO
Q9BY32	Inosine triphosphate pyrophosphatase	ITPA	290470	248630	263810	203070	220920	311620	239680	269130	224910	225550	310575	252008	258433	219616	222010	1	0.855958	0.908218	0.699108	0.76056	1.06922	0.867587	0.889707	0.75607	0.764312	0.0692151	0.0116294	-0.0185107	0.0569612	0.00375196	0.123047	NO
Q8WVV4	Protein POF1B	POF1B	22535	19179	17373	16029	7262.1	26736	18048	20932	13106	6736.3	26646.3	18976.3	20100	12797.5	6630.57	1	0.851076	0.770934	0.711294	0.322259	1.18244	0.842081	0.891948	0.567893	0.294234	0.182442	-0.00899482	0.121014	-0.1434	-0.0280245	0.123036	NO
P60002	Transcription elongation factor 1 homolog	ELOF1	49672	46574	44126	24284	15374	56127	47151	42370	28334	12463	55938.8	49576.2	40686	27667	12267.4	1	0.937631	0.888348	0.488887	0.30951	1.12616	0.998072	0.819093	0.556994	0.246968	0.126163	0.0604409	-0.069255	0.0681069	-0.0625426	0.122913	NO
Q9BYB4	Guanine nucleotide-binding protein subunit beta-like protein 1	GNB1L	324830	306410	274700	224330	210640	330630	299820	296100	235550	225260	329521	315241	284331	230005	221724	1	0.943293	0.845673	0.690607	0.648462	1.01444	0.970481	0.875323	0.708078	0.682586	0.0144419	0.0271874	0.0296501	0.0174708	0.0341236	0.122874	NO
Q9H7E2	Tudor domain-containing protein 3	TDRD3	39147	38094	37605	30874	28839	43492	37965	37856	32714	28231	43346.1	39917.7	36351.4	31943.9	27787.9	1	0.973101	0.96061	0.788668	0.736685	1.10727	1.01969	0.928587	0.815999	0.709835	0.107266	0.0465869	-0.0320234	0.0273302	-0.0268502	0.122309	NO
Q96FV2	Secernin-2	SCRN2	163300	140460	134060	102480	90287	173050	133470	135720	119620	92063	172470	140335	130326	116804	90618	1	0.860135	0.820943	0.627557	0.55289	1.05615	0.85937	0.798075	0.715273	0.554917	0.0561521	-0.000765154	-0.0228678	0.0877164	0.00202698	0.122263	NO
Q9UNZ2	NSFL1 cofactor p47	NSFL1C	619150	535010	533670	419000	397430	614060	527550	564790	454590	433650	612001	554685	542342	443889	426844	1	0.864104	0.86194	0.676734	0.641896	0.988453	0.895881	0.875946	0.716932	0.689402	-0.0115471	0.0317768	0.0140062	0.0401982	0.0475063	0.12194	NO
Q86VQ1	Glucocorticoid-induced transcript 1 protein	GLCCI1	72789	63221	67069	54025	49167	72453	65978	69607	56773	52105	72210	69371.6	66840.4	55436.5	51287.2	1	0.868552	0.921417	0.742214	0.675473	0.992046	0.95305	0.918276	0.761606	0.704601	-0.00795432	0.0844989	-0.00314047	0.0193922	0.0291277	0.121924	NO
Q9UIJ7	GTP:AMP phosphotransferase AK3, mitochondrial	AK3	709790	649920	633090	488900	503660	679050	636410	653010	539920	580800	676773	669144	627056	527210	571684	1	0.915651	0.89194	0.688795	0.70959	0.953483	0.942735	0.883438	0.742769	0.805427	-0.0465171	0.0270839	-0.00850175	0.0539737	0.0958367	0.121875	NO
Q96B54	Zinc finger protein 428	ZNF428	51406	43280	38429	34521	26916	55548	39270	42536	34269	30334	55361.7	41289.9	40845.4	33462.3	29857.9	1	0.841925	0.747559	0.671536	0.523596	1.07695	0.803211	0.794564	0.650941	0.580825	0.0769503	-0.0387142	0.0470056	-0.020595	0.0572285	0.121875	NO
Q9BS26	Endoplasmic reticulum resident protein 44	ERP44	780360	681520	662620	478920	423020	796510	655560	695160	556430	434370	793839	689279	667530	543331	427552	1	0.873341	0.849121	0.613717	0.542083	1.01727	0.883283	0.855413	0.696257	0.547891	0.0172725	0.00994263	0.00629229	0.0825406	0.0058079	0.121856	NO
Q13501	Sequestosome-1	SQSTM1	56422	44941	40043	28527	26958	55210	43871	45684	31864	28065	55024.8	46127.5	43868.2	31113.9	27624.5	1	0.796516	0.709705	0.505601	0.477792	0.975237	0.817545	0.777503	0.55145	0.489605	-0.0247627	0.0210292	0.0677971	0.0458492	0.0118128	0.121726	NO
O60234	Glia maturation factor gamma	GMFG	171320	145560	156840	125400	131090	180130	144370	151400	143470	136390	179526	151796	145382	140093	134249	1	0.849638	0.91548	0.731964	0.765176	1.0479	0.886036	0.848602	0.817725	0.783617	0.0478981	0.0363979	-0.0668779	0.0857614	0.0184407	0.12162	NO
P31350	Ribonucleoside-diphosphate reductase subunit M2	RRM2	640020	575030	588230	456540	461420	656160	550370	591250	511170	507510	653959	578678	567750	499137	499544	1	0.898456	0.919081	0.713321	0.720946	1.02178	0.904157	0.887082	0.779877	0.780514	0.0217797	0.0057004	-0.0319986	0.0665554	0.0595673	0.121604	NO
P15531	Nucleoside diphosphate kinase A	NME1	1670200	1505800	1544200	1190900	1275100	1791400	1443100	1516200	1315800	1366200	1.78539e+06	1.51733e+06	1.45594e+06	1.28483e+06	1.34476e+06	1	0.901569	0.92456	0.713028	0.763442	1.06897	0.90847	0.871714	0.769264	0.805147	0.0689691	0.00690101	-0.0528456	0.056236	0.0417055	0.120966	NO
Q9Y266	Nuclear migration protein nudC	NUDC	2347100	1995700	2059000	1600100	1619500	2417100	1948900	2121800	1800300	1677600	2.40899e+06	2.04914e+06	2.03747e+06	1.75792e+06	1.65127e+06	1	0.850283	0.877253	0.681735	0.69	1.02637	0.873053	0.868079	0.748975	0.703536	0.0263703	0.0227694	-0.00917422	0.0672405	0.0135354	0.120741	NO
Q9UGK8	Secretion-regulating guanine nucleotide exchange factor	SERGEF	95175	86502	86853	71574	76547	93558	84382	88721	82446	81750	93244.2	88722.2	85194.7	80505.2	80466.9	1	0.908873	0.912561	0.752025	0.804276	0.979714	0.932201	0.895137	0.845865	0.845462	-0.0202865	0.0233276	-0.0174236	0.0938396	0.041186	0.120643	NO
Q9UGU0	Transcription factor 20	TCF20	88877	82722	84143	70649	69135	99197	80596	84581	74713	69537	98864.3	84741.5	81219.3	72954.2	68445.6	1	0.930747	0.946735	0.794908	0.777873	1.11237	0.953469	0.913839	0.820845	0.770116	0.112372	0.0227221	-0.0328965	0.0259372	-0.00775716	0.120378	NO
O60825	6-phosphofructo-2-kinase/fructose-2,6-bisphosphatase 2;6-phosphofructo-2-kinase;Fructose-2,6-bisphosphatase	PFKFB2	361480	326200	322620	269990	236010	377610	325060	339600	289080	236990	376344	341780	326102	282275	233270	1	0.902401	0.892498	0.746902	0.652899	1.04112	0.9455	0.902131	0.780887	0.64532	0.0411187	0.0430992	0.00963345	0.0339851	-0.0075792	0.120257	NO
P60660	Myosin light polypeptide 6	MYL6	502950	456040	403750	300980	288960	512560	443180	427130	329290	309390	510841	465975	410153	321538	304534	1	0.90673	0.802764	0.598429	0.57453	1.01569	0.926484	0.815495	0.639305	0.605495	0.0156895	0.0197535	0.0127316	0.0408755	0.0309651	0.120015	NO
Q8N7B6	PACRG-like protein	PACRGL	10864	8914	9753.5	7491.5	6101.8	9985.1	9618.1	9663	8598.5	6789.9	9951.61	10112.8	9278.94	8396.09	6683.33	1	0.820508	0.897782	0.689571	0.561653	0.916017	0.930855	0.854099	0.772836	0.615181	-0.0839826	0.110347	-0.0436823	0.0832646	0.053528	0.119475	NO
Q9NQT8	Kinesin-like protein KIF13B	KIF13B	216000	196590	185420	155790	141730	222800	194440	201240	168880	138870	222053	204441	193242	164904	136690	1	0.910139	0.858426	0.72125	0.656157	1.02802	0.946486	0.894637	0.763447	0.632826	0.0280222	0.0363475	0.0362108	0.0421967	-0.0233318	0.119445	NO
Q8NHZ8	Anaphase-promoting complex subunit CDC26	CDC26	94251	74696	67898	42121	38084	95549	70387	73466	46001	44281	95228.6	74007.4	70546	44918.1	43586	1	0.792522	0.720396	0.446902	0.40407	1.01037	0.785216	0.748491	0.47658	0.462446	0.0103718	-0.00730638	0.0280955	0.0296773	0.0583758	0.119214	NO
P78356	Phosphatidylinositol 5-phosphate 4-kinase type-2 beta	PIP4K2B	123730	95010	77711	50292	56121	128300	97786	91074	54971	46520	127870	102816	87454.2	53677	45789.8	1	0.767882	0.628069	0.406466	0.453576	1.03346	0.830968	0.706815	0.433823	0.370079	0.0334577	0.0630861	0.0787455	0.0273576	-0.0834977	0.119149	NO
Q9BU02	Thiamine-triphosphatase	THTPA	36431	32031	31977	26584	25249	41324	28957	32799	28191	26370	41185.4	30446.4	31495.4	27527.4	25956.1	1	0.879224	0.877741	0.729708	0.693064	1.1305	0.835728	0.864521	0.755603	0.712473	0.130505	-0.0434957	-0.0132202	0.0258947	0.0194094	0.119093	NO
Q15382	GTP-binding protein Rheb	RHEB	389130	323350	254210	200690	170230	383990	302880	288560	220110	193680	382702	318459	277091	214929	190640	1	0.830956	0.653278	0.51574	0.437463	0.983482	0.818386	0.712078	0.552331	0.489914	-0.0165184	-0.0125699	0.0588002	0.0365906	0.0524505	0.118753	NO
Q13573	SNW domain-containing protein 1	SNW1	584890	521800	516670	393240	415120	618400	506070	513300	448500	428560	616326	532100	492898	437942	421833	1	0.892134	0.883363	0.672332	0.70974	1.05375	0.909743	0.84272	0.74876	0.721218	0.053747	0.0176098	-0.0406428	0.0764282	0.0114781	0.11862	NO
Q9H9Q2	COP9 signalosome complex subunit 7b	COPS7B	165930	148140	145270	119050	126560	181850	137160	141750	133350	134860	181240	144215	136116	130211	132743	1	0.892786	0.87549	0.717471	0.762731	1.09227	0.869131	0.820322	0.784734	0.799996	0.0922686	-0.0236555	-0.0551677	0.0672626	0.0372644	0.117972	NO
Q8NBF2	NHL repeat-containing protein 2	NHLRC2	466360	417660	419630	329430	317390	480300	400050	428500	374490	334270	478689	420627	411469	365674	329023	1	0.895574	0.899798	0.706386	0.680569	1.02644	0.901935	0.882299	0.784103	0.705514	0.0264371	0.00636125	-0.0174996	0.0777175	0.0249451	0.117961	NO
Q16719	Kynureninase	KYNU	359490	326570	310270	238320	244830	355190	311510	334480	268610	260930	353999	327533	321186	262287	256835	1	0.908426	0.863084	0.662939	0.681048	0.984725	0.911103	0.893448	0.729608	0.714441	-0.015275	0.00267759	0.0303647	0.0666689	0.0333932	0.117829	NO
Q7L523	Ras-related GTP-binding protein A;Ras-related GTP-binding protein B	RRAGA;RRAGB	180340	167760	155150	108130	109130	163210	163520	164300	127700	126690	162663	171931	157770	124694	124702	1	0.930243	0.860319	0.59959	0.605135	0.901978	0.95337	0.874846	0.691438	0.69148	-0.0980224	0.0231267	0.0145267	0.0918481	0.0863453	0.117824	NO
Q7Z3B4	Nucleoporin p54	NUP54	646280	578250	577310	460960	460340	649580	563020	592060	501450	509730	647401	591979	568528	489646	501729	1	0.894736	0.893282	0.713251	0.712292	1.00174	0.915979	0.879693	0.757637	0.776334	0.00173531	0.0212431	-0.0135885	0.0443858	0.0640426	0.117818	NO
Q12769	Nuclear pore complex protein Nup160	NUP160	161980	132510	86402	58335	46439	175450	113460	102130	60871	53923	174862	119296	98070.8	59438.1	53076.6	1	0.818064	0.533412	0.360137	0.286696	1.07953	0.736485	0.60545	0.366947	0.327674	0.0795258	-0.081579	0.0720382	0.0068099	0.0409781	0.117773	NO
P31946	14-3-3 protein beta/alpha;14-3-3 protein beta/alpha, N-terminally processed	YWHAB	440420	388680	414290	328530	327480	446780	389410	428050	362590	336740	445282	409439	411037	354054	331455	1	0.882521	0.94067	0.745947	0.743563	1.01104	0.929657	0.933284	0.803902	0.752588	0.0110386	0.0471354	-0.00738664	0.0579548	0.00902462	0.117767	NO
Q93075	Putative deoxyribonuclease TATDN2	TATDN2	15071	14054	13114	12670	10995	14896	14449	14558	12295	11840	14846	15192.2	13979.4	12005.6	11654.2	1	0.932519	0.870148	0.840687	0.729547	0.985074	1.00804	0.927568	0.796601	0.773284	-0.0149265	0.0755216	0.0574202	-0.0440867	0.0437372	0.117666	NO
O00625	Pirin	PIR	403010	375900	368370	292590	303040	412310	354620	368880	332230	333060	410927	372860	354219	324409	327832	1	0.932731	0.914047	0.726012	0.751942	1.01965	0.925188	0.878932	0.804965	0.81346	0.0196452	-0.0075434	-0.0351144	0.0789537	0.061518	0.117459	NO
Q8N4T8	Carbonyl reductase family member 4	CBR4	102710	95370	96903	74203	77570	109820	88130	94211	85640	83932	109452	92663	90466.5	83624	82614.6	1	0.928537	0.943462	0.722452	0.755233	1.06564	0.902181	0.880795	0.814176	0.804348	0.0656382	-0.026356	-0.0626667	0.0917242	0.0491152	0.117455	NO
P09525	Annexin A4	ANXA4	525600	494040	478850	398650	397280	545770	491040	489280	413110	429430	543940	516297	469833	403385	422690	1	0.939954	0.911054	0.758467	0.75586	1.03489	0.9823	0.893899	0.767476	0.804204	0.0348928	0.0423454	-0.0171554	0.00900911	0.0483443	0.117436	NO
Q8TEL6	Short transient receptor potential channel 4-associated protein	TRPC4AP	67604	62753	65844	50447	43311	67966	64152	69599	51406	46392	67738.1	67451.7	66832.7	50195.9	45663.8	1	0.928244	0.973966	0.746213	0.640657	1.00198	0.997747	0.988591	0.742499	0.675461	0.00198304	0.0695028	0.0146253	-0.00371461	0.0348033	0.1172	NO
Q9UBB4	Ataxin-10	ATXN10	770200	724810	691080	542800	546100	759760	709630	720320	588290	605260	757212	746130	691690	574441	595760	1	0.941067	0.897273	0.704752	0.709037	0.983137	0.968748	0.898066	0.745834	0.773513	-0.0168632	0.027681	0.000792325	0.041082	0.0644768	0.117169	NO
Q86W34	Archaemetzincin-2	AMZ2	135090	126470	125740	110610	109330	148710	123070	124830	118060	112050	148211	129400	119869	115281	110291	1	0.936191	0.930787	0.818787	0.809312	1.09713	0.957881	0.887323	0.853363	0.816428	0.0971298	0.0216902	-0.0434635	0.0345755	0.00711596	0.117048	NO
Q96ST2	Protein IWS1 homolog	IWS1	330930	321210	285580	221900	206190	328600	320940	307150	237430	216180	327498	337448	294942	231841	212787	1	0.970628	0.862962	0.670535	0.623062	0.989629	1.01969	0.891252	0.700573	0.642997	-0.0103709	0.0490666	0.0282901	0.0300389	0.0199344	0.116959	NO
P12277	Creatine kinase B-type	CKB	1825300	1516700	900120	361450	296540	1979200	1389700	1084700	371310	280070	1.97256e+06	1.46118e+06	1.04159e+06	362569	275674	1	0.830932	0.493135	0.198022	0.162461	1.08068	0.800515	0.570639	0.198635	0.151029	0.0806784	-0.0304172	0.0775038	0.00061315	-0.0114315	0.116947	NO
P18440	Arylamine N-acetyltransferase 1	NAT1	73125	57498	26573	18475	11852	84669	53398	32575	14594	10154	84385	56144.5	31280.3	14250.5	9994.63	1	0.786297	0.363391	0.25265	0.162079	1.15398	0.767789	0.427764	0.194878	0.136679	0.153984	-0.0185089	0.064373	-0.0577716	-0.0254	0.116676	NO
O96007	Molybdopterin synthase catalytic subunit	MOCS2	203100	172320	180130	134210	134870	205480	166040	181910	157520	142640	204791	174580	174680	153812	140401	1	0.848449	0.886903	0.660807	0.664057	1.00833	0.859578	0.860068	0.757321	0.691291	0.00832535	0.011129	-0.0268349	0.0965136	0.0272337	0.116367	NO
P23327	Sarcoplasmic reticulum histidine-rich calcium-binding protein	HRC	21293	15400	16769	14190	12797	24728	16440	16928	14305	10944	24645.1	17285.6	16255.2	13968.3	10772.2	1	0.723242	0.787536	0.666416	0.600996	1.15743	0.811797	0.763405	0.656002	0.505905	0.157426	0.0885546	-0.0241309	-0.0104141	-0.0950911	0.116345	NO
Q9UNW1	Multiple inositol polyphosphate phosphatase 1	MINPP1	302480	270610	277940	217790	231010	303230	257030	270210	256140	256960	302213	270250	259470	250110	252927	1	0.894638	0.918871	0.720015	0.76372	0.999117	0.893449	0.85781	0.826866	0.836177	-0.000882528	-0.00118891	-0.061061	0.106851	0.0724571	0.116176	NO
P26374	Rab proteins geranylgeranyltransferase component A 2	CHML	573680	513840	511740	419350	391980	585470	502200	523580	449210	431010	583507	528031	502770	438635	424245	1	0.895691	0.89203	0.730982	0.683273	1.01713	0.920427	0.876394	0.764599	0.739515	0.0171289	0.0247363	-0.0156362	0.033617	0.0562421	0.116088	NO
Q6P2P2	Putative protein arginine N-methyltransferase 9	PRMT9	175920	167740	150660	118550	98893	187680	166280	154150	135450	91442	187051	174833	148023	132261	90006.8	1	0.953502	0.856412	0.673886	0.562148	1.06327	0.993819	0.841423	0.751827	0.511635	0.0632707	0.0403174	-0.0149888	0.0779413	-0.050513	0.116028	NO
O15347	High mobility group protein B3	HMGB3	378190	342880	353370	282760	296240	384580	332270	352220	310370	328530	383290	349360	338221	303064	323373	1	0.906634	0.934372	0.747667	0.78331	1.01349	0.923769	0.894314	0.801353	0.855056	0.0134859	0.0171352	-0.0400574	0.0536866	0.0717456	0.115996	NO
Q5SVZ6	Zinc finger MYM-type protein 1	ZMYM1	23845	22311	19090	15975	12957	26493	21522	21620	14914	12787	26404.2	22629	20760.7	14562.9	12586.3	1	0.935668	0.800587	0.669952	0.543384	1.10732	0.949003	0.870652	0.610733	0.527838	0.107324	0.0133356	0.0700648	-0.0592192	-0.0155463	0.115959	NO
Q14207	Protein NPAT	NPAT	137220	129230	121190	99608	106520	144220	120870	124230	111530	112390	143736	127087	119292	108905	110626	1	0.941772	0.88318	0.7259	0.776272	1.04749	0.926155	0.869351	0.793649	0.806194	0.0474882	-0.0156175	-0.0138291	0.0677491	0.0299224	0.115713	NO
Q8TCA0	Leucine-rich repeat-containing protein 20	LRRC20	118930	106280	105620	89081	93337	123460	108010	106610	96727	95051	123046	113566	102373	94450	93559.1	1	0.893635	0.888085	0.74902	0.784806	1.03461	0.954894	0.860781	0.794165	0.786674	0.0346082	0.0612588	-0.0273044	0.0451442	0.00186754	0.115574	NO
O95721	Synaptosomal-associated protein 29	SNAP29	577810	537940	517940	413340	403950	579960	527760	552730	424710	446360	578015	554905	530761	414712	439354	1	0.930998	0.896385	0.715356	0.699105	1.00035	0.96036	0.918574	0.717731	0.760378	0.000354753	0.0293616	0.0221894	0.00237469	0.0612728	0.115553	NO
P48163	NADP-dependent malic enzyme	ME1	532270	514670	491880	410430	418710	540430	493090	503210	437910	468920	538618	518452	483209	427601	461560	1	0.966934	0.924117	0.771094	0.78665	1.01193	0.97404	0.907828	0.803354	0.867154	0.0119254	0.00710572	-0.0162897	0.0322607	0.0805042	0.115506	NO
P34931	Heat shock 70 kDa protein 1-like	HSPA1L	19795	15847	17175	15093	12950	22051	15675	17484	15307	13158	21977	16481.2	16789.1	14946.7	12951.5	1	0.800556	0.867643	0.762465	0.654206	1.11023	0.832596	0.848148	0.755073	0.65428	0.110232	0.0320407	-0.0194957	-0.00739248	7.45525e-05	0.115459	NO
P17029	Zinc finger protein with KRAB and SCAN domains 1	ZKSCAN1	77100	67929	68086	50677	55582	76562	66454	68053	61440	57655	76305.2	69872.1	65348.2	59993.7	56750.1	1	0.881051	0.883087	0.657289	0.720908	0.989692	0.906253	0.847577	0.778128	0.736058	-0.0103083	0.025202	-0.0355101	0.120839	0.01515	0.115372	NO
P54802	Alpha-N-acetylglucosaminidase;Alpha-N-acetylglucosaminidase 82 kDa form;Alpha-N-acetylglucosaminidase 77 kDa form	NAGLU	210020	205140	184430	148920	151710	212880	202080	192550	156320	164830	212166	212474	184897	152640	162243	1	0.976764	0.878154	0.709075	0.72236	1.01022	1.01168	0.880378	0.726789	0.772512	0.0102184	0.0349206	0.00222327	0.0177133	0.0501518	0.115227	NO
Q7L591	Docking protein 3	DOK3	462970	407150	396080	310630	308970	486360	385500	409000	343060	326450	484729	405328	392744	334984	321326	1	0.879431	0.85552	0.670951	0.667365	1.047	0.875496	0.848314	0.723555	0.694054	0.0469985	-0.00393491	-0.00720579	0.0526043	0.0266888	0.115151	NO
Q96A49	Synapse-associated protein 1	SYAP1	764450	670320	696160	510690	539290	786310	664910	690640	588010	557500	783673	699110	663190	574168	548750	1	0.876866	0.910668	0.668049	0.705461	1.02515	0.914526	0.867539	0.751086	0.717836	0.0251461	0.0376607	-0.0431292	0.0830374	0.0123744	0.11509	NO
P05423	DNA-directed RNA polymerase III subunit RPC4	POLR3D	345120	294010	267700	169370	143610	365090	276960	284970	194840	142750	363866	291205	273644	190253	140509	1	0.851907	0.775672	0.490757	0.416116	1.05432	0.84378	0.792894	0.551267	0.407132	0.0543162	-0.00812621	0.0172219	0.0605105	-0.00898402	0.114938	NO
P35219	Carbonic anhydrase-related protein	CA8	298930	260890	273120	199820	210930	291760	259730	274410	233650	226040	290782	273089	263503	228150	222492	1	0.872746	0.913659	0.668451	0.705617	0.972741	0.913556	0.881488	0.763221	0.744295	-0.0272588	0.0408097	-0.0321703	0.0947706	0.0386784	0.11483	NO
Q13572	Inositol-tetrakisphosphate 1-kinase	ITPK1	129490	119500	116280	96494	85421	137840	113910	125210	97283	91097	137378	119769	120233	94992.9	89667.2	1	0.922851	0.897984	0.745185	0.659673	1.06091	0.924928	0.928515	0.733593	0.692464	0.0609138	0.00207722	0.0305307	-0.0115923	0.0327915	0.114721	NO
P61244	Protein max	MAX	27569	27078	27561	21173	22308	29624	26244	26084	24149	23473	29524.6	27593.9	25047.3	23580.5	23104.6	1	0.98219	0.99971	0.768	0.80917	1.07094	1.0009	0.90853	0.855327	0.838064	0.0709365	0.0187118	-0.0911796	0.0873271	0.0288938	0.11469	NO
Q9UBT2	SUMO-activating enzyme subunit 2	UBA2	1592300	1356300	1193400	779420	638000	1704100	1295400	1255200	898220	608570	1.69838e+06	1.36203e+06	1.20531e+06	877075	599018	1	0.851787	0.749482	0.489493	0.400678	1.06662	0.855385	0.756962	0.550823	0.376197	0.0666237	0.003598	0.00748036	0.0613298	-0.0244815	0.11455	NO
Q9C0D5	Protein TANC1	TANC1	437790	403390	394970	338370	306160	457000	402770	415430	347340	318780	455467	423487	398918	339163	313777	1	0.921424	0.902191	0.772905	0.699331	1.04038	0.967328	0.911209	0.774717	0.716728	0.0403786	0.0459045	0.00901887	0.00181239	0.0173977	0.114512	NO
Q9GZT3	SRA stem-loop-interacting RNA-binding protein, mitochondrial	SLIRP	358940	310080	310730	243710	210370	382960	301310	311150	271640	215690	381676	316808	298783	265245	212305	1	0.863877	0.865688	0.678971	0.586087	1.06334	0.882621	0.832404	0.738969	0.591477	0.0633411	0.0187439	-0.0332839	0.0599974	0.00538973	0.114188	NO
P13639	Elongation factor 2	EEF2	4836100	4399800	4315900	3302600	3437900	5093900	4277800	4231700	3798100	3553000	5.07682e+06	4.49783e+06	4.06351e+06	3.70869e+06	3.49723e+06	1	0.909783	0.892434	0.682906	0.710883	1.04977	0.930053	0.840245	0.766876	0.723152	0.0497749	0.0202703	-0.0521893	0.0839707	0.0122688	0.114095	NO
P35269	General transcription factor IIF subunit 1	GTF2F1	515820	469450	461840	363720	394100	548260	456930	451680	402570	416640	546421	480432	433728	393093	410101	1	0.910104	0.895351	0.70513	0.764026	1.05933	0.931395	0.840851	0.762075	0.795046	0.0593255	0.0212909	-0.0545004	0.0569449	0.0310196	0.11408	NO
Q96RE7	Nucleus accumbens-associated protein 1	NACC1	263540	231380	232120	174430	161740	276080	223310	242470	185950	171610	275154	234796	232833	181573	168916	1	0.877969	0.880777	0.661873	0.613721	1.04407	0.890931	0.883482	0.688976	0.640952	0.0440696	0.0129619	0.00270478	0.0271027	0.027231	0.11407	NO
P62937	Peptidyl-prolyl cis-trans isomerase A;Peptidyl-prolyl cis-trans isomerase A, N-terminally processed	PPIA	2846500	2578400	2570100	2094200	2207600	3099100	2505600	2501900	2328800	2257200	3.08871e+06	2.63448e+06	2.40246e+06	2.27398e+06	2.22177e+06	1	0.905814	0.902898	0.735711	0.775549	1.08509	0.925514	0.844005	0.798868	0.780528	0.0850892	0.0197	-0.0588935	0.0631579	0.00497862	0.114032	NO
P11831	Serum response factor	SRF	61783	63024	55168	54220	49822	68215	57348	59615	55323	52316	67986.2	60297.7	57245.5	54020.7	51494.9	1	1.02009	0.892932	0.877588	0.806403	1.1004	0.975959	0.926558	0.874361	0.833479	0.100403	-0.044127	0.0336266	-0.0032263	0.0270764	0.113753	NO
P31040	Succinate dehydrogenase [ubiquinone] flavoprotein subunit, mitochondrial	SDHA	553980	488720	456280	376930	356840	580580	468900	471880	401290	385160	578633	493018	453125	391843	379115	1	0.882198	0.82364	0.680404	0.644139	1.0445	0.889956	0.817944	0.707324	0.684347	0.0445014	0.0077583	-0.00569567	0.0269205	0.0402084	0.113693	NO
Q9GZM5	Protein YIPF3;Protein YIPF3, 36 kDa form III	YIPF3	5756.6	5678.8	5547.2	5486.3	5367.1	7397.7	6054.5	4906.5	5139.8	5100.7	7372.89	6365.91	4711.49	5018.81	5020.64	1	0.986485	0.963624	0.953045	0.932339	1.28077	1.10585	0.81845	0.871835	0.872154	0.280772	0.119361	-0.145175	-0.08121	-0.0601847	0.113563	NO
P60891	Ribose-phosphate pyrophosphokinase 1	PRPS1	465360	414080	393500	261270	212280	514830	374250	389210	316590	213090	513103	393500	373741	309137	209745	1	0.889806	0.845582	0.561436	0.456163	1.10259	0.845581	0.803121	0.664297	0.450716	0.102595	-0.0442247	-0.0424607	0.102861	-0.00544654	0.113324	NO
Q9NRA8	Eukaryotic translation initiation factor 4E transporter	EIF4ENIF1	75027	67799	69021	57639	53396	73040	67762	70223	60219	62082	72795	71247.3	67431.9	58801.4	61107.6	1	0.903661	0.919949	0.768243	0.71169	0.970251	0.949623	0.898769	0.783737	0.814475	-0.0297487	0.0459614	-0.02118	0.0154933	0.102784	0.11331	NO
P62942	Peptidyl-prolyl cis-trans isomerase FKBP1A	FKBP1A	321380	285400	282440	257560	237010	362210	275630	292000	258520	240300	360995	289807	280394	252434	236528	1	0.888045	0.878835	0.801419	0.737476	1.12327	0.901758	0.872469	0.78547	0.735977	0.123266	0.013713	-0.00636566	-0.015949	-0.00149879	0.113166	NO
O00764	Pyridoxal kinase	PDXK	464400	403830	389380	262130	198970	466740	399480	415250	296300	201090	465175	420027	398746	289325	197934	1	0.869574	0.838458	0.564449	0.428445	1.00167	0.904452	0.858625	0.623008	0.426214	0.00166815	0.0348779	0.0201669	0.0585593	-0.00223138	0.113041	NO
P49643	DNA primase large subunit	PRIM2	259360	230330	153090	87360	66981	279330	213970	172400	94997	65765	278393	224976	165548	92760.7	64732.8	1	0.888071	0.590261	0.336829	0.258255	1.07339	0.867426	0.638294	0.357652	0.249587	0.0733853	-0.0206447	0.0480329	0.0208233	-0.00866837	0.112928	NO
P30307	M-phase inducer phosphatase 3	CDC25C	14819	13648	13841	13648	11805	16291	13255	14061	13165	13109	16236.4	13936.8	13502.1	12855.1	12903.2	1	0.92098	0.934004	0.92098	0.796612	1.09565	0.940466	0.911137	0.867473	0.870723	0.0956451	0.0194867	-0.022867	-0.0535063	0.0741106	0.112869	NO
P78395	Melanoma antigen preferentially expressed in tumors	PRAME	29711	22056	17489	11908	9587	34889	20003	18971	12973	7533.6	34772	21031.9	18217	12667.6	7415.35	1	0.742351	0.588637	0.400794	0.322675	1.17034	0.707881	0.613139	0.426361	0.249583	0.170341	-0.0344701	0.0245021	0.0255666	-0.0730923	0.112847	NO
O00410	Importin-5	IPO5	2262300	2045200	2044800	1640100	1727000	2332500	1971100	2019100	1844100	1866700	2.32468e+06	2.07248e+06	1.93885e+06	1.80069e+06	1.8374e+06	1	0.904036	0.903859	0.72497	0.763382	1.02757	0.916096	0.857026	0.795955	0.812183	0.0275726	0.0120602	-0.0468333	0.0709848	0.0488003	0.112585	NO
Q9H832	Ubiquitin-conjugating enzyme E2 Z	UBE2Z	308930	280390	283250	223450	219330	312800	276690	288580	240630	239060	311751	290922	277110	234965	235308	1	0.907617	0.916874	0.723303	0.709967	1.00913	0.941707	0.897	0.760578	0.761686	0.00913138	0.0340905	-0.0198746	0.0372753	0.0517197	0.112342	NO
Q9BVG4	Protein PBDC1	PBDC1	402710	354310	362160	280930	287130	390030	346750	378160	318750	309610	388722	364585	363130	311246	304750	1	0.879814	0.899307	0.697599	0.712994	0.965265	0.905329	0.901715	0.77288	0.756749	-0.0347348	0.025515	0.00240793	0.0752811	0.0437547	0.112224	NO
Q6ZS17	Protein FAM65A	FAM65A	268280	243490	217300	166290	134010	271030	229200	227730	183840	152510	270121	240989	218679	179512	150116	1	0.907597	0.809975	0.619837	0.499515	1.00686	0.898274	0.815114	0.669123	0.559551	0.00686239	-0.00932258	0.00513893	0.0492855	0.0600352	0.111999	NO
P30153	Serine/threonine-protein phosphatase 2A 65 kDa regulatory subunit A alpha isoform	PPP2R1A	1168400	1102700	1046800	880170	856780	1324300	1050800	1023200	972040	842480	1.31986e+06	1.10485e+06	982532	949158	829257	1	0.943769	0.895926	0.753312	0.733293	1.12963	0.945608	0.840921	0.812357	0.709737	0.129629	0.00183846	-0.0550051	0.0590446	-0.0235564	0.111951	NO
Q14651	Plastin-1	PLS1	428830	386080	379890	300510	310520	415160	383880	389840	332710	342590	413768	403625	374345	324878	337213	1	0.90031	0.885876	0.700767	0.72411	0.964876	0.941224	0.872946	0.757591	0.786355	-0.0351242	0.0409135	-0.0129294	0.056824	0.0622457	0.111929	NO
Q9UBP0	Spastin	SPAST	485330	412660	406080	336390	294370	506290	406430	431330	352640	303440	504592	427335	414186	344339	298677	1	0.850267	0.836709	0.693116	0.606536	1.03969	0.880504	0.853412	0.709494	0.615411	0.0396886	0.0302367	0.0167029	0.0163779	0.00887498	0.111881	NO
Q9NRY5	Protein FAM114A2	FAM114A2	546010	459450	467190	362520	318810	553240	446150	507270	391130	330620	551385	469098	487108	381923	325431	1	0.841468	0.855644	0.663944	0.58389	1.00984	0.859138	0.892123	0.699479	0.596016	0.00984339	0.0176696	0.0364794	0.0355353	0.0121256	0.111653	NO
P05023	Sodium/potassium-transporting ATPase subunit alpha-1	ATP1A1	30643	26582	23735	18351	14253	32366	24586	23828	19609	17112	32257.5	25850.6	22880.9	19147.4	16843.4	1	0.867474	0.774565	0.598864	0.465131	1.05269	0.843605	0.746694	0.624854	0.549666	0.0526859	-0.0238689	-0.0278714	0.0259894	0.0845353	0.11147	NO
Q16643	Drebrin	DBN1	699380	660280	637640	505760	430490	745940	607980	650920	555240	468960	743438	639252	625049	542169	461599	1	0.944093	0.911722	0.723155	0.615531	1.063	0.914026	0.893718	0.775214	0.660012	0.0629963	-0.0300673	-0.0180036	0.0520595	0.0444813	0.111466	NO
Q9UBF8	Phosphatidylinositol 4-kinase beta	PI4KB	170900	156330	153730	122470	101910	183380	152910	157000	127610	107120	182765	160775	150760	124606	105439	1	0.914745	0.899532	0.716618	0.596314	1.06943	0.940755	0.882153	0.729116	0.616961	0.0694265	0.0260091	-0.0173792	0.0124985	0.0206476	0.111203	NO
P35270	Sepiapterin reductase	SPR	498300	449640	450910	358070	383450	497240	423510	458250	415090	416060	495572	445293	440036	405319	409530	1	0.902348	0.904897	0.718583	0.769516	0.994526	0.893625	0.883075	0.813403	0.821854	-0.00547381	-0.00872305	-0.0218213	0.0948195	0.0523372	0.111139	NO
Q9Y3B7	39S ribosomal protein L11, mitochondrial	MRPL11	12209	10743	10686	7184.9	7834.7	13255	10447	10656	8154.2	7744.5	13210.5	10984.3	10232.5	7962.25	7622.94	1	0.879925	0.875256	0.588492	0.641715	1.08203	0.899692	0.838109	0.652162	0.624371	0.0820335	0.0197676	-0.0371474	0.0636699	-0.0173442	0.110979	NO
P35250	Replication factor C subunit 2	RFC2	444360	380860	289930	169350	122680	441880	368050	322800	196820	128770	440398	386981	309970	192187	126749	1	0.857098	0.652466	0.38111	0.276082	0.991084	0.870872	0.697565	0.432502	0.285239	-0.00891606	0.0137742	0.0450986	0.0513925	0.00915668	0.110506	NO
P62979	Ubiquitin-40S ribosomal protein S27a;Ubiquitin;40S ribosomal protein S27a;Polyubiquitin-B;Ubiquitin;Polyubiquitin-C;Ubiquitin	RPS27A;UBB;UBC	1818800	1609000	1591300	1374200	1209800	1912500	1493800	1724400	1418600	1306700	1.90609e+06	1.57063e+06	1.65586e+06	1.38521e+06	1.28619e+06	1	0.884649	0.874918	0.755553	0.665164	1.04799	0.863555	0.910415	0.761604	0.707164	0.047991	-0.0210942	0.0354971	0.00605095	0.0420004	0.110445	NO
Q8IWY9	Codanin-1	CDAN1	191510	184980	155330	130690	88649	188800	191930	183590	121390	88836	188167	201802	176293	118532	87441.7	1	0.965903	0.81108	0.682419	0.462895	0.982543	1.05374	0.920542	0.618936	0.456591	-0.017457	0.0878385	0.109462	-0.0634827	-0.00630434	0.110056	NO
O60271	C-Jun-amino-terminal kinase-interacting protein 4	SPAG9	1170300	1083500	1058200	825020	838720	1177400	1062400	1086600	918810	886800	1.17345e+06	1.11704e+06	1.04341e+06	897181	872881	1	0.925831	0.904213	0.704965	0.716671	1.00269	0.954494	0.891577	0.766625	0.745861	0.00269276	0.0286633	-0.012636	0.0616601	0.02919	0.10957	NO
Q86WR7	Proline and serine-rich protein 2	PROSER2	123210	114630	109560	87366	85357	131650	105550	112510	97567	89521	131208	110979	108038	95270.2	88115.9	1	0.930363	0.889214	0.709082	0.692777	1.06492	0.90073	0.876862	0.773235	0.715168	0.0649175	-0.0296325	-0.0123513	0.0641525	0.0223919	0.109478	NO
Q8WXB1	Protein N-lysine methyltransferase METTL21A	METTL21A	13326	10797	10873	8326	7332.3	12601	10645	12648	9361.4	7188.2	12558.7	11192.5	12145.3	9141.03	7075.38	1	0.810221	0.815924	0.624794	0.550225	0.942424	0.839901	0.911398	0.685954	0.530945	-0.0575762	0.0296809	0.0954746	0.0611607	-0.0192799	0.10946	NO
Q6ZN17	Protein lin-28 homolog B	LIN28B	235880	214060	216540	176370	157750	238930	216700	221860	190930	163530	238129	227846	213042	186435	160963	1	0.907495	0.918009	0.747711	0.668772	1.00953	0.96594	0.903179	0.790382	0.682395	0.00953322	0.058445	-0.0148297	0.0426718	0.0136225	0.109443	NO
Q8TEH3	DENN domain-containing protein 1A	DENND1A	161940	146840	146750	133320	126300	179700	136930	153480	144710	123040	179097	143973	147380	141303	121109	1	0.906756	0.9062	0.823268	0.779918	1.10595	0.889052	0.910089	0.872567	0.747862	0.105949	-0.017704	0.00388911	0.0492989	-0.0320563	0.109376	NO
O75131	Copine-3	CPNE3	756300	712720	690520	545670	553760	731900	716260	703150	581590	625860	729445	753101	675203	567899	616037	1	0.942377	0.913024	0.721499	0.732196	0.964492	0.99577	0.892771	0.750891	0.81454	-0.0355078	0.0533928	-0.020253	0.0293919	0.0823439	0.109368	NO
Q14678	KN motif and ankyrin repeat domain-containing protein 1	KANK1	62863	55898	42579	31062	29915	68970	53916	46924	32430	27463	68738.7	56689.2	45059	31666.6	27031.9	1	0.889204	0.67733	0.494122	0.475876	1.09347	0.901789	0.71678	0.50374	0.430014	0.0934682	0.0125857	0.0394503	0.00961745	-0.0458625	0.109259	NO
O60232	Sjoegren syndrome/scleroderma autoantigen 1	SSSCA1	173100	149330	151960	82159	67959	174870	146150	154660	102830	67600	174284	153667	148513	100409	66539	1	0.862681	0.877874	0.474633	0.3926	1.00684	0.887737	0.85796	0.580065	0.384396	0.0068373	0.0250563	-0.0199139	0.105432	-0.00820353	0.109208	NO
Q15814	Tubulin-specific chaperone C	TBCC	347540	321620	334040	286470	285000	376050	318300	333430	292680	301920	374789	334672	320178	285790	297181	1	0.925419	0.961156	0.824279	0.820049	1.0784	0.962974	0.921268	0.822323	0.855099	0.0784049	0.0375548	-0.0398874	-0.00195612	0.0350496	0.109166	NO
Q6KC79	Nipped-B-like protein	NIPBL	265830	238020	248430	194220	183120	276800	227240	245060	213440	203240	275872	238928	235320	208416	200050	1	0.895384	0.934545	0.730617	0.688861	1.03777	0.8988	0.885227	0.784018	0.752549	0.0377749	0.00341619	-0.0493177	0.0534007	0.0636873	0.108961	NO
P05166	Propionyl-CoA carboxylase beta chain, mitochondrial	PCCB	204250	180920	173740	145070	145410	218840	174460	180900	157520	144820	218106	183433	173710	153812	142547	1	0.885777	0.850624	0.710257	0.711922	1.06784	0.898083	0.850477	0.753057	0.697904	0.0678388	0.0123054	-0.000147023	0.0428	-0.0140174	0.10878	NO
Q8NB14	Ubiquitin carboxyl-terminal hydrolase 38	USP38	93483	87931	78382	60722	51620	100450	80757	83782	66726	52499	100113	84910.7	80452	65155.2	51675	1	0.94061	0.838463	0.649551	0.552186	1.07092	0.908301	0.860606	0.696974	0.552774	0.0709233	-0.032308	0.0221432	0.0474229	0.000588242	0.10877	NO
P78346	Ribonuclease P protein subunit p30	RPP30	182960	168070	168120	131200	124160	220050	158230	162020	135000	123250	219312	166369	155580	131822	121316	1	0.918616	0.918889	0.717097	0.678618	1.19869	0.909317	0.850352	0.720496	0.663071	0.198688	-0.00929938	-0.0685375	0.00339984	-0.0155471	0.108704	NO
Q9NZT2	Opioid growth factor receptor	OGFR	316120	281850	256270	196190	173020	328400	265530	280870	212400	176970	327299	279188	269707	207400	174192	1	0.891592	0.810673	0.620619	0.547324	1.03536	0.88317	0.853178	0.65608	0.551032	0.035362	-0.00842219	0.0425047	0.0354612	0.00370849	0.108614	NO
Q9NZ63	Uncharacterized protein C9orf78	C9orf78	724190	636180	671200	549490	564100	750180	635370	666240	617710	574150	747664	668050	639760	603169	565138	1	0.878471	0.926829	0.758765	0.778939	1.03241	0.922479	0.883414	0.832888	0.780373	0.0324143	0.0440083	-0.0434144	0.0741225	0.00143375	0.108564	NO
Q9NW68	BSD domain-containing protein 1	BSDC1	132970	122980	118530	100630	94092	136940	121120	126740	103370	98685	136481	127350	121703	100937	97136.1	1	0.92487	0.891404	0.756787	0.707618	1.0264	0.957734	0.915264	0.759093	0.730511	0.0264025	0.0328632	0.0238596	0.00230593	0.0228929	0.108324	NO
Q8NCW5	NAD(P)H-hydrate epimerase	APOA1BP	616020	552610	548900	422320	456740	614850	535750	553270	482380	492640	612788	563306	531280	471025	484908	1	0.897065	0.891042	0.685562	0.741437	0.994753	0.914429	0.862439	0.764625	0.787162	-0.00524663	0.0173637	-0.0286033	0.0790632	0.0457252	0.108302	NO
Q8TBA6	Golgin subfamily A member 5	GOLGA5	25370	23087	21530	17883	16399	27501	22300	21093	18403	18221	27408.8	23447	20254.6	17969.8	17935	1	0.910012	0.84864	0.704888	0.646393	1.08036	0.924202	0.79837	0.708308	0.706938	0.0803614	0.0141901	-0.0502704	0.00342075	0.0605443	0.108246	NO
Q8IYB9	Zinc finger protein 595;Zinc finger protein 519;Zinc finger protein 732;Zinc finger protein 141;Zinc finger protein 718	ZNF595;ZNF519;ZNF732;ZNF141;ZNF718	80485	75395	67727	30201	17293	85370	76017	72280	30805	15551	85083.7	79926.9	69407.2	30079.8	15306.9	1	0.936758	0.841486	0.375238	0.21486	1.05714	0.993066	0.862362	0.373732	0.190183	0.0571373	0.056308	0.0208755	-0.00150543	-0.0246765	0.108139	NO
Q96CD0	F-box/LRR-repeat protein 8	FBXL8	73556	68236	66989	55713	45007	77955	65817	72728	56394	46382	77693.6	69202.3	69837.4	55066.5	45654	1	0.927674	0.910721	0.757423	0.611874	1.05625	0.940811	0.949445	0.748633	0.62067	0.0562505	0.013137	0.0387237	-0.0087898	0.00879604	0.108117	NO
Q8NHP8	Putative phospholipase B-like 2;Putative phospholipase B-like 2 32 kDa form;Putative phospholipase B-like 2 45 kDa form	PLBD2	686540	625880	633560	492080	518770	638980	610600	646040	556720	597550	636837	642006	620363	543615	588171	1	0.911644	0.92283	0.716754	0.75563	0.927604	0.935133	0.903607	0.791818	0.856718	-0.0723963	0.0234892	-0.0192231	0.0750641	0.101088	0.108022	NO
Q5VZE5	N-alpha-acetyltransferase 35, NatC auxiliary subunit	NAA35	53508	48000	31075	20344	13994	55313	43971	40161	20382	13068	55127.5	46232.7	38564.8	19902.2	12862.9	1	0.897062	0.580754	0.380205	0.261531	1.03027	0.864033	0.720729	0.371948	0.240392	0.0302664	-0.0330295	0.139975	-0.00825675	-0.0211391	0.107816	NO
Q15024	Exosome complex component RRP42	EXOSC7	256420	212970	211570	149400	124000	272050	198570	229460	159130	128360	271138	208783	220340	155384	126345	1	0.830551	0.825092	0.582638	0.483582	1.0574	0.814225	0.859293	0.605975	0.492728	0.0573965	-0.0163268	0.0342014	0.0233367	0.00914631	0.107754	NO
P51452	Dual specificity protein phosphatase 3	DUSP3	390500	341610	341170	266070	241780	397870	338820	353040	301830	240370	396536	356247	339008	294725	236597	1	0.874802	0.873675	0.681357	0.619155	1.01546	0.912285	0.868139	0.754737	0.605883	0.0154562	0.0374834	-0.0055362	0.0733797	-0.0132722	0.107511	NO
O14841	5-oxoprolinase	OPLAH	514870	477580	453670	371730	307180	526370	461900	481760	385900	335930	524605	485658	462612	376816	330657	1	0.927574	0.881135	0.721988	0.596617	1.01891	0.943263	0.898503	0.731866	0.642215	0.0189071	0.0156892	0.0173675	0.00987769	0.0455986	0.10744	NO
P17050	Alpha-N-acetylgalactosaminidase	NAGA	159380	152210	152010	133900	130770	163700	144620	157340	139630	145020	163151	152059	151086	136343	142744	1	0.955013	0.953758	0.840131	0.820492	1.02366	0.954063	0.947963	0.855459	0.895619	0.0236604	-0.00095023	-0.00579506	0.0153284	0.0751274	0.107371	NO
P23588	Eukaryotic translation initiation factor 4B	EIF4B	1371700	1248300	1228100	944580	1006600	1494700	1193100	1174200	1058000	1058100	1.48969e+06	1.25447e+06	1.12753e+06	1.03309e+06	1.04149e+06	1	0.910039	0.895312	0.68862	0.733834	1.08602	0.914535	0.821995	0.753149	0.759271	0.0860153	0.00449609	-0.0733175	0.0645288	0.0254373	0.10716	NO
Q8TBZ6	tRNA methyltransferase 10 homolog A	TRMT10A	104710	88187	94384	83973	67535	101450	89702	101710	86151	73950	101110	94315.8	97667.4	84123	72789.3	1	0.842202	0.901385	0.801958	0.644972	0.965617	0.900734	0.932742	0.80339	0.695151	-0.0343829	0.0585315	0.0313575	0.00143218	0.0501796	0.107118	NO
Q8NB46	Serine/threonine-protein phosphatase 6 regulatory ankyrin repeat subunit C	ANKRD52	46077	36451	28979	24082	15708	42198	35542	31438	23631	23916	42056.5	37370.1	30188.5	23074.7	23540.6	1	0.791089	0.628925	0.522647	0.340908	0.912743	0.811036	0.655174	0.500786	0.510897	-0.0872566	0.0199472	0.0262489	-0.0218609	0.16999	0.107068	NO
Q86UE8	Serine/threonine-protein kinase tousled-like 2	TLK2	133970	105990	77136	56544	52447	108290	91130	94053	81173	68171	107927	95817.3	90314.8	79262.1	67101	1	0.791147	0.575771	0.422065	0.391483	0.805604	0.715214	0.674142	0.591641	0.500866	-0.194396	-0.0759328	0.0983711	0.169576	0.109383	0.107002	YES
Q9UI08	Ena/VASP-like protein	EVL	264530	237210	238090	180780	183960	258840	229300	245250	209140	197160	257972	241094	235502	204217	194065	1	0.896722	0.900049	0.683401	0.695422	0.975209	0.911405	0.890267	0.771998	0.733624	-0.0247914	0.014683	-0.00978217	0.0885977	0.0382015	0.106908	NO
O43598	2-deoxynucleoside 5-phosphate N-hydrolase 1	DNPH1	176410	163860	158180	130200	141330	188210	163190	152780	145200	143430	187579	171584	146708	141782	141179	1	0.928859	0.896661	0.738053	0.801145	1.06331	0.972642	0.831629	0.803707	0.800288	0.0633116	0.0437827	-0.0650325	0.0656534	-0.000857302	0.106858	NO
P11171	Protein 4.1	EPB41	986170	853910	851630	605430	541330	1012000	830280	871090	677660	572980	1.00861e+06	872986	836468	661708	563987	1	0.865885	0.863573	0.613921	0.548922	1.02275	0.885228	0.848198	0.670987	0.571896	0.0227507	0.0193431	-0.0153749	0.0570668	0.0229744	0.10676	NO
Q9BUJ2	Heterogeneous nuclear ribonucleoprotein U-like protein 1	HNRNPUL1	1087400	985130	998040	778780	837460	1116400	945810	995770	870810	903360	1.11266e+06	994458	956192	850311	889181	1	0.90595	0.917822	0.716185	0.770149	1.02323	0.914528	0.879338	0.781967	0.817713	0.023226	0.00857815	-0.0384842	0.0657814	0.047564	0.106665	NO
A2RUC4	tRNA wybutosine-synthesizing protein 5	TYW5	138350	124090	117000	89797	82412	137680	118120	125720	97213	90765	137218	124196	120723	94924.6	89340.4	1	0.896928	0.845681	0.649057	0.595678	0.99182	0.897691	0.872592	0.686119	0.645756	-0.00818026	0.000762708	0.0269111	0.0370622	0.0500786	0.106634	NO
Q15365	Poly(rC)-binding protein 1	PCBP1	1465700	1348300	1335100	1066000	1094500	1473600	1282200	1386000	1177100	1187100	1.46866e+06	1.34815e+06	1.33091e+06	1.14939e+06	1.16847e+06	1	0.919902	0.910896	0.727298	0.746742	1.00202	0.9198	0.908039	0.784192	0.797208	0.00201813	-0.000102233	-0.00285719	0.0568947	0.0504657	0.106419	NO
Q7Z739	YTH domain-containing family protein 3	YTHDF3	308080	283720	269230	230080	216290	324740	280510	271610	236740	233260	323651	294938	260815	231167	229599	1	0.92093	0.873896	0.746819	0.702058	1.05054	0.957342	0.846581	0.750347	0.745257	0.0505418	0.0364129	-0.0273156	0.00352839	0.0431992	0.106367	NO
P30046	D-dopachrome decarboxylase;D-dopachrome decarboxylase-like protein	DDT;DDTL	277130	229820	239410	203230	182760	303070	218490	223350	222390	201560	302054	229728	214473	217155	198396	1	0.829286	0.863891	0.733338	0.659474	1.08993	0.828954	0.773907	0.783585	0.715896	0.0899347	-0.000331731	-0.0899839	0.0502466	0.0564225	0.106288	NO
P51911	Calponin-1	CNN1	25297	23318	21713	17904	13981	26986	22598	22795	18201	14815	26895.5	23760.3	21889	17772.5	14582.5	1	0.921769	0.858323	0.707752	0.552674	1.06319	0.939255	0.86528	0.702555	0.57645	0.0631892	0.0174855	0.00695706	-0.00519668	0.0237763	0.106211	NO
O14641	Segment polarity protein dishevelled homolog DVL-2	DVL2	158910	112960	104270	80901	69152	148350	110540	120730	90189	76145	147852	116226	115931	88065.9	74949.8	1	0.710843	0.656158	0.509099	0.435165	0.930416	0.731393	0.729542	0.554187	0.47165	-0.0695836	0.0205503	0.0733842	0.0450878	0.0364851	0.105924	NO
Q8N6T3	ADP-ribosylation factor GTPase-activating protein 1	ARFGAP1	400070	350650	323110	216320	183830	432030	336660	333930	232280	187240	430581	353976	320658	226812	184301	1	0.876472	0.807634	0.540705	0.459495	1.07626	0.884786	0.801504	0.566931	0.460672	0.0762644	0.00831394	-0.00612978	0.0262255	0.00117763	0.105852	NO
Q8NHP6	Motile sperm domain-containing protein 2	MOSPD2	49216	41386	41170	33254	34041	49409	40536	42802	36985	35756	49243.3	42621	41100.8	36114.4	35194.8	1	0.840905	0.836517	0.675675	0.691665	1.00055	0.865998	0.83511	0.733793	0.715109	0.000554623	0.025093	-0.00140611	0.0581184	0.0234433	0.105803	NO
O00161	Synaptosomal-associated protein 23	SNAP23	331790	299010	297400	245950	232500	329050	297310	317970	260760	245030	327946	312602	305332	254622	241184	1	0.901203	0.89635	0.741282	0.700744	0.988416	0.942169	0.920257	0.767418	0.726918	-0.0115843	0.0409662	0.0239067	0.0261358	0.0261734	0.105598	NO
Q9H910	Hematological and neurological expressed 1-like protein	HN1L	519970	456450	489520	402900	406740	528760	449600	494000	437350	436190	526987	472725	474366	427055	429344	1	0.877839	0.941439	0.774852	0.782237	1.01349	0.909139	0.912294	0.821306	0.825709	0.0134944	0.0313004	-0.0291449	0.0464538	0.0434711	0.105575	NO
P51570	Galactokinase	GALK1	479000	439220	385420	281030	225230	496300	418160	411580	300080	241720	494636	439668	395221	293016	237926	1	0.916952	0.804635	0.586701	0.470209	1.03264	0.917888	0.825097	0.611724	0.496714	0.0326421	0.000935543	0.0204622	0.0250229	0.0265053	0.105568	NO
P10606	Cytochrome c oxidase subunit 5B, mitochondrial	COX5B	100220	87483	84804	67831	53205	105520	80863	93297	72842	54066	105166	85022.2	89588.8	71127.3	53217.4	1	0.87291	0.846178	0.676821	0.530882	1.04935	0.848356	0.893922	0.709711	0.531006	0.0493526	-0.024554	0.0477433	0.0328903	0.000123682	0.105556	NO
P31947	14-3-3 protein sigma	SFN	341080	333620	311070	308610	260540	382290	307850	329780	289910	291030	381008	323684	316673	283085	286462	1	0.978128	0.912015	0.904802	0.763868	1.11706	0.948998	0.928441	0.829968	0.839868	0.117063	-0.0291301	0.0164261	-0.0748347	0.076	0.105524	NO
P61289	Proteasome activator complex subunit 3	PSME3	556940	500420	505610	400580	397610	571180	476210	528170	431400	428210	569264	500704	507177	421245	421489	1	0.898517	0.907836	0.719252	0.713919	1.02213	0.899027	0.91065	0.756356	0.756794	0.0221288	0.000509814	0.00281434	0.0371039	0.0428752	0.105432	NO
Q9H8U3	AN1-type zinc finger protein 3	ZFAND3	39923	35848	35214	26542	17220	43316	35241	35721	25465	19876	43170.7	37053.6	34301.2	24865.5	19564	1	0.897929	0.882048	0.66483	0.43133	1.08135	0.928127	0.859185	0.622838	0.490044	0.0813499	0.0301988	-0.0228631	-0.0419923	0.0587138	0.105407	NO
Q9UBQ7	Glyoxylate reductase/hydroxypyruvate reductase	GRHPR	927140	790570	774000	595930	660750	985190	746700	775250	689480	671890	981886	785107	744437	673249	661344	1	0.852698	0.834825	0.642762	0.712676	1.05905	0.846805	0.802939	0.726157	0.713316	0.0590482	-0.00589271	-0.0318862	0.0833955	0.000640901	0.105306	NO
Q96MW1	Coiled-coil domain-containing protein 43	CCDC43	314860	287130	295510	215020	222760	318130	278300	289010	254020	236900	317063	292614	277523	248040	233182	1	0.911929	0.938544	0.682907	0.707489	1.007	0.929348	0.881417	0.787779	0.740588	0.00699702	0.0174185	-0.0571268	0.104873	0.0330994	0.105261	NO
O75323	Protein NipSnap homolog 2	GBAS	343820	306920	288580	180690	163520	338570	298800	289930	214750	182880	337435	314169	278406	209695	180010	1	0.892676	0.839335	0.525537	0.475598	0.981428	0.91376	0.809745	0.609897	0.523558	-0.0185721	0.0210832	-0.0295897	0.0843601	0.0479599	0.105241	NO
Q8TF74	WAS/WASL-interacting protein family member 2	WIPF2	23382	21649	19694	16764	14068	22603	19648	22679	18489	15236	22527.2	20658.6	21777.6	18053.8	14996.9	1	0.925883	0.842272	0.716962	0.601659	0.963442	0.883526	0.931383	0.772122	0.641385	-0.0365582	-0.0423575	0.0891114	0.0551604	0.0397254	0.105082	NO
O75817	Ribonuclease P protein subunit p20	POP7	34572	35303	34159	25669	25085	39428	33559	33409	26336	26458	39295.8	35285.1	32081.1	25716	26042.7	1	1.02114	0.988054	0.742479	0.725587	1.13664	1.02063	0.927951	0.74384	0.753289	0.136636	-0.000517401	-0.0601027	0.00136057	0.0277023	0.105078	NO
P04183	Thymidine kinase, cytosolic	TK1	556870	518220	502210	425920	432540	568880	495660	518150	459330	467240	566972	521154	497556	448517	459906	1	0.930594	0.901844	0.764846	0.776734	1.01814	0.935864	0.893486	0.805425	0.825877	0.0181409	0.00526936	-0.00835801	0.0405789	0.0491431	0.104774	NO
Q9Y2Z0	Suppressor of G2 allele of SKP1 homolog	SUGT1	1091700	1006800	1044900	844440	889000	1127800	984730	1051500	919980	938460	1.12402e+06	1.03538e+06	1.00971e+06	898323	923730	1	0.922231	0.957131	0.773509	0.814326	1.0296	0.94841	0.924894	0.822866	0.846139	0.0296031	0.0261791	-0.0322367	0.0493572	0.031813	0.104716	NO
P49454	Centromere protein F	CENPF	353870	345170	315790	233640	201230	368810	344180	342050	241470	196070	367573	361883	328455	235786	192993	1	0.975415	0.89239	0.660242	0.568655	1.03872	1.02264	0.92818	0.666306	0.545377	0.0387236	0.0472291	0.0357898	0.00606347	-0.0232782	0.104528	NO
O95822	Malonyl-CoA decarboxylase, mitochondrial	MLYCD	10292	7698.7	6392.8	6719.1	6367.5	9388.2	7743.2	8129.7	6993.8	6514.1	9356.71	8141.47	7806.58	6829.16	6411.86	1	0.748028	0.621143	0.652847	0.618684	0.909125	0.791049	0.758509	0.663541	0.622994	-0.090875	0.0430211	0.137367	0.010694	0.00430981	0.104517	NO
Q5JTV8	Torsin-1A-interacting protein 1	TOR1AIP1	143020	132970	130500	117400	113690	144000	127870	135510	125490	123820	143517	134447	130124	122536	121877	1	0.92973	0.91246	0.820864	0.794924	1.00348	0.940057	0.909831	0.856775	0.852164	0.00347549	0.0103273	-0.00262875	0.0359104	0.0572406	0.104325	NO
Q96KR1	Zinc finger RNA-binding protein	ZFR	834640	745010	735330	578450	536890	836960	725480	764490	630150	580050	834153	762795	734105	615316	570946	1	0.892612	0.881015	0.693053	0.643259	0.999417	0.913921	0.879546	0.737223	0.684062	-0.000583395	0.0213088	-0.00146809	0.0441699	0.0408029	0.10423	NO
P00352	Retinal dehydrogenase 1	ALDH1A1	2545100	2289200	2265300	1751500	1935500	2482300	2175100	2326300	2013900	2123800	2.47398e+06	2.28698e+06	2.23384e+06	1.96649e+06	2.09047e+06	1	0.899454	0.890063	0.688185	0.760481	0.972054	0.89858	0.877702	0.772658	0.821369	-0.0279458	-0.000873597	-0.0123613	0.0844728	0.0608878	0.10418	NO
Q8IVW6	AT-rich interactive domain-containing protein 3B	ARID3B	138790	124330	121910	104480	94016	150940	119710	124950	106290	99435	150434	125867	119984	103788	97874.3	1	0.895814	0.878377	0.752792	0.677398	1.0839	0.90689	0.864499	0.747805	0.705197	0.083895	0.0110765	-0.0138789	-0.0049868	0.0277995	0.103905	NO
Q8TCU4	Alstrom syndrome protein 1	ALMS1	102080	92592	87815	77897	64894	106020	88877	95462	77114	70917	105664	93448.4	91667.8	75298.7	69803.9	1	0.907053	0.860257	0.763098	0.635717	1.03511	0.915443	0.897999	0.737644	0.683816	0.035114	0.00838952	0.0377427	-0.0254536	0.0480986	0.103891	NO
P41567	Eukaryotic translation initiation factor 1;Eukaryotic translation initiation factor 1b	EIF1;EIF1B	171400	147300	157300	114590	118550	173360	147500	155840	134820	119640	172779	155087	149646	131646	117762	1	0.859393	0.917736	0.668553	0.691657	1.00804	0.904823	0.873081	0.768065	0.68706	0.00804317	0.0454299	-0.0446558	0.0995115	-0.00459647	0.103732	NO
O95819	Mitogen-activated protein kinase kinase kinase kinase 4	MAP4K4	126230	107470	104280	90505	77342	129500	109120	111270	92036	79652	129066	114733	106847	89869.4	78401.8	1	0.851382	0.826111	0.716985	0.612707	1.02246	0.908917	0.846451	0.71195	0.621103	0.0224645	0.0575347	0.0203397	-0.00503503	0.00839582	0.1037	YES
Q9H410	Kinetochore-associated protein DSN1 homolog	DSN1	207000	198900	188590	162840	147580	212290	201170	193060	160320	163880	211578	211517	185387	156546	161308	1	0.96087	0.911063	0.786667	0.712947	1.02212	1.02182	0.895588	0.756261	0.779265	0.0221161	0.0609527	-0.0154751	-0.0304058	0.0663178	0.103506	NO
Q96N64	PWWP domain-containing protein 2A	PWWP2A	9463.2	8796.8	7605.4	5775.4	6046.9	8607.8	8080.3	8306.5	6601	7282.6	8578.93	8495.91	7976.35	6445.61	7168.29	1	0.92958	0.803682	0.610301	0.638991	0.906557	0.897784	0.842881	0.681124	0.757492	-0.0934428	-0.0317956	0.0391993	0.0708227	0.118501	0.103284	NO
O75865	Trafficking protein particle complex subunit 6A	TRAPPC6A	37620	31416	28898	19466	18396	36703	30608	30198	22873	19897	36579.9	32182.3	28997.8	22334.6	19584.7	1	0.835088	0.768155	0.517438	0.488995	0.972353	0.855458	0.770807	0.593688	0.520593	-0.0276473	0.0203702	0.00265162	0.0762509	0.0315976	0.103223	NO
P14625	Endoplasmin	HSP90B1	3944200	3558500	3536300	2505000	2437800	4077900	3479100	3503000	2981900	2429100	4.06422e+06	3.65805e+06	3.36377e+06	2.9117e+06	2.39097e+06	1	0.902211	0.896582	0.63511	0.618072	1.03043	0.92745	0.85284	0.738224	0.6062	0.0304305	0.0252391	-0.0437427	0.103115	-0.0118722	0.103169	NO
P12955	Xaa-Pro dipeptidase	PEPD	367610	346270	325390	289110	290750	386290	327900	331420	303430	317710	384994	344766	318247	296287	312723	1	0.941949	0.88515	0.786458	0.79092	1.04729	0.937857	0.86572	0.805982	0.850693	0.0472906	-0.00409241	-0.0194298	0.0195237	0.0597734	0.103066	NO
Q9NZD4	Alpha-hemoglobin-stabilizing protein	AHSP	172480	161730	163290	138810	144710	180880	155240	157960	152040	157630	180273	163225	151682	148461	155156	1	0.937674	0.946718	0.804789	0.838996	1.04518	0.94634	0.879416	0.860743	0.899559	0.0451843	0.00866648	-0.0673021	0.0559538	0.0605629	0.103065	NO
Q8TAA5	GrpE protein homolog 2, mitochondrial	GRPEL2	49267	43766	34496	20112	14499	53309	42172	36076	21879	13950	53130.2	44341.1	34642.1	21364	13731	1	0.888343	0.700185	0.408225	0.294294	1.07841	0.900017	0.703151	0.433636	0.278707	0.0784139	0.0116736	0.00296604	0.0254117	-0.0155876	0.102878	NO
Q9BZK7	F-box-like/WD repeat-containing protein TBL1XR1	TBL1XR1	508840	473850	458380	361630	330980	526660	463530	464600	403670	338760	524894	487372	446134	394167	333443	1	0.931236	0.900833	0.710695	0.65046	1.03155	0.957809	0.876767	0.774639	0.6553	0.0315497	0.0265737	-0.0240664	0.0639443	0.00484026	0.102841	NO
Q719H9	BTB/POZ domain-containing protein KCTD1	KCTD1	7436.3	6906.7	5780.5	6045.5	5539.6	9176.6	6603.7	6904.7	5250	4701	9145.82	6943.36	6630.27	5126.41	4627.21	1	0.928782	0.777336	0.812972	0.74494	1.22989	0.933712	0.891608	0.689377	0.622247	0.229889	0.00493019	0.114273	-0.123595	-0.122693	0.102804	NO
O60566	Mitotic checkpoint serine/threonine-protein kinase BUB1 beta	BUB1B	728970	635320	646050	542620	430790	767870	615360	675860	548110	469360	765295	647011	648997	535207	461993	1	0.871531	0.88625	0.744365	0.590957	1.04983	0.887569	0.890294	0.734197	0.633761	0.0498303	0.0160379	0.00404317	-0.0101688	0.0428043	0.102547	YES
P28072	Proteasome subunit beta type-6	PSMB6	435660	432060	411540	357260	349460	449570	413020	428360	371560	380110	448062	434264	411334	362813	374144	1	0.991737	0.944636	0.820043	0.802139	1.02847	0.996795	0.944164	0.83279	0.858798	0.0284678	0.00505841	-0.0004718	0.0127469	0.0566586	0.10246	NO
P22061	Protein-L-isoaspartate(D-aspartate) O-methyltransferase	PCMT1	920120	848690	851330	673330	696750	951220	835170	831310	756830	732360	948030	878127	798269	739014	720865	1	0.922369	0.925238	0.731785	0.757238	1.03033	0.954361	0.86757	0.803171	0.783447	0.0303329	0.0319927	-0.0576676	0.0713862	0.0262086	0.102253	NO
P45954	Short/branched chain specific acyl-CoA dehydrogenase, mitochondrial	ACADSB	79504	68708	62339	43651	37651	80526	64659	63765	51949	40396	80255.9	67984.7	61230.6	50726.1	39762	1	0.864208	0.784099	0.549042	0.473574	1.00946	0.855111	0.770158	0.638032	0.500125	0.00945787	-0.00909708	-0.0139414	0.0889904	0.0265516	0.101961	NO
P22314	Ubiquitin-like modifier-activating enzyme 1	UBA1	2465100	2265500	2079600	1745300	1755600	2403200	2222300	2218800	1911600	1862500	2.39514e+06	2.3366e+06	2.13061e+06	1.8666e+06	1.83327e+06	1	0.91903	0.843617	0.708004	0.712182	0.97162	0.947874	0.864311	0.757211	0.743689	-0.02838	0.0288444	0.0206936	0.0492069	0.0315065	0.101871	NO
A6NDG6	Phosphoglycolate phosphatase	PGP	678230	629650	613590	512610	529320	657660	610120	629050	577520	576610	655454	641502	604048	563925	567560	1	0.928372	0.904693	0.755806	0.780443	0.966419	0.945847	0.890624	0.831466	0.836825	-0.0335809	0.0174743	-0.0140692	0.07566	0.0563816	0.101866	NO
Q9UID6	Zinc finger protein 639	ZNF639	37835	30979	26660	23736	17855	42882	31316	27582	20700	18851	42738.2	32926.7	26485.7	20212.7	18555.1	1	0.818792	0.704639	0.627356	0.471918	1.12959	0.870272	0.700032	0.534233	0.490422	0.129594	0.0514799	-0.00460607	-0.0931225	0.0185046	0.10185	NO
P0DPB6			139020	122950	92605	85010	62900	166450	100080	111270	76402	65086	165892	105228	106847	74603.5	64064.4	1	0.884405	0.666127	0.611495	0.452453	1.19329	0.756924	0.768576	0.536638	0.460829	0.193294	-0.127481	0.102449	-0.0748564	0.00837598	0.101782	NO
P20839	Inosine-5-monophosphate dehydrogenase 1	IMPDH1	187300	76625	33572	25706	24992	203100	71187	41423	26164	25032	202419	74848.5	39776.6	25548.1	24639.1	1	0.409103	0.179242	0.137245	0.133433	1.08072	0.399618	0.212368	0.136402	0.131549	0.08072	-0.00948471	0.0331266	-0.000843103	-0.00188412	0.101635	NO
Q15369	Transcription elongation factor B polypeptide 1	TCEB1	418430	411470	361500	266240	267440	411350	409440	369980	306660	276700	409970	430500	355275	299441	272357	1	0.983366	0.863944	0.636283	0.639151	0.979783	1.02884	0.849066	0.71563	0.650902	-0.0202174	0.0454786	-0.0148775	0.0793468	0.0117511	0.101482	NO
Q5R3I4	Tetratricopeptide repeat protein 38	TTC38	214250	188810	189040	150590	139910	216470	178520	193700	171210	150030	215744	187702	186001	167180	147675	1	0.88126	0.882334	0.70287	0.653022	1.00697	0.87609	0.86815	0.780302	0.689266	0.00697326	-0.00517058	-0.0141833	0.0774312	0.0362435	0.101294	NO
Q9UQR1	Zinc finger protein 148	ZNF148	6342.8	6688.7	5831.4	6333.6	5996.3	6851.6	6421	6872.4	6091.8	5797.9	6828.62	6751.27	6599.25	5948.4	5706.9	1	1.05453	0.919373	0.99855	0.945371	1.07659	1.0644	1.04043	0.937819	0.899744	0.0765942	0.00986396	0.121059	-0.0607309	-0.0456269	0.101159	NO
Q9P1Z2	Calcium-binding and coiled-coil domain-containing protein 1	CALCOCO1	149190	132540	107590	69836	69087	151520	131560	119920	75988	65674	151012	138327	115154	74199.2	64643.2	1	0.888397	0.721161	0.468101	0.463081	1.01221	0.927186	0.771859	0.497347	0.433294	0.0122116	0.0387882	0.0506983	0.029246	-0.0297862	0.101158	NO
Q9NRR5	Ubiquilin-4	UBQLN4	251010	223410	221140	169770	172970	264290	212890	220440	191120	180980	263404	223840	211678	186621	178139	1	0.890044	0.881001	0.676348	0.689096	1.04938	0.891757	0.843307	0.74348	0.70969	0.0493751	0.0017132	-0.037694	0.0671326	0.0205944	0.101121	NO
Q8TCD5	5(3)-deoxyribonucleotidase, cytosolic type	NT5C	224020	199400	201560	160370	160830	225060	198870	212060	166220	172190	224305	209099	203631	162307	169487	1	0.890099	0.899741	0.715874	0.717927	1.00127	0.933394	0.908988	0.724521	0.756572	0.00127316	0.0432948	0.00924689	0.008647	0.0386455	0.101107	NO
Q9H496	Torsin-1A-interacting protein 2, isoform IFRG15	TOR1AIP2	8613.9	6497.8	5522.1	5858.1	5021	9967.7	7792	6488.9	4497.1	3692.4	9934.27	8192.78	6230.99	4391.24	3634.45	1	0.754339	0.641069	0.680075	0.582895	1.15328	0.951112	0.723365	0.509785	0.421928	0.153284	0.196773	0.0822964	-0.17029	-0.160967	0.101096	NO
P49914	5-formyltetrahydrofolate cyclo-ligase	MTHFS	250090	210260	184420	113060	97047	246130	200970	200000	133510	102740	245305	211307	192051	130367	101127	1	0.840737	0.737415	0.452077	0.388048	0.980865	0.844924	0.767927	0.521281	0.404364	-0.0191349	0.00418619	0.0305123	0.0692035	0.0163158	0.101083	NO
Q9NVS9	Pyridoxine-5-phosphate oxidase	PNPO	152760	135690	137690	110950	109890	159360	134070	143450	113780	115590	158826	140966	137748	111102	113776	1	0.888256	0.901349	0.726303	0.719364	1.03971	0.922793	0.901731	0.727295	0.744801	0.0397064	0.0345373	0.000382651	0.000992168	0.0254368	0.101055	NO
Q9UHD1	Cysteine and histidine-rich domain-containing protein 1	CHORDC1	1609000	1364000	1436700	1113800	1080800	1621900	1317200	1513400	1210200	1148400	1.61646e+06	1.38495e+06	1.45325e+06	1.18171e+06	1.13038e+06	1	0.847732	0.892915	0.692231	0.671722	1.00464	0.860752	0.9032	0.734438	0.702533	0.0046368	0.0130208	0.010285	0.0422071	0.0308111	0.100961	NO
Q86W50	Methyltransferase-like protein 16	METTL16	262210	248770	237610	188340	195150	261960	236430	238690	211580	216430	261081	248591	229203	206599	213033	1	0.948743	0.906182	0.718279	0.744251	0.995696	0.94806	0.87412	0.787915	0.812452	-0.00430395	-0.000683368	-0.0320619	0.0696362	0.068201	0.100788	NO
Q9NUD5	Zinc finger CCHC domain-containing protein 3	ZCCHC3	120010	107430	99608	77877	72868	119490	110050	104490	78924	78917	119089	115710	100337	77066.1	77678.3	1	0.895175	0.829998	0.648921	0.607183	0.992328	0.964173	0.836072	0.642164	0.647266	-0.00767216	0.0689979	0.0060741	-0.00675701	0.0400828	0.100726	NO
P36955	Pigment epithelium-derived factor	SERPINF1	75244	69984	68615	59088	55572	79072	65964	69857	62133	61126	78806.8	69356.9	67080.5	60670.4	60166.6	1	0.930094	0.9119	0.785285	0.738557	1.04735	0.921759	0.891506	0.806315	0.79962	0.0473502	-0.00833464	-0.020394	0.0210297	0.0610625	0.100714	NO
Q5TFE4	5-nucleotidase domain-containing protein 1	NT5DC1	745520	656380	665330	495340	451390	742660	632710	699810	549230	482880	740169	665254	671995	536301	475301	1	0.880432	0.892437	0.664422	0.60547	0.992823	0.892335	0.901378	0.719365	0.637543	-0.0071771	0.0119025	0.00894065	0.0549427	0.0320727	0.100681	NO
Q96CT7	Coiled-coil domain-containing protein 124	CCDC124	693760	633690	655850	539610	523740	766330	613090	623810	571970	559350	763760	644624	599016	558506	550571	1	0.913414	0.945356	0.777805	0.75493	1.1009	0.929175	0.863434	0.805041	0.793604	0.100899	0.015761	-0.0819215	0.0272364	0.0386742	0.10065	NO
Q8IXW5	Putative RNA polymerase II subunit B1 CTD phosphatase RPAP2	RPAP2	144850	114720	103770	76880	66036	157900	105990	106380	84891	68013	157370	111442	102152	82892.6	66945.5	1	0.791992	0.716396	0.530756	0.455892	1.08644	0.769359	0.705225	0.572265	0.462171	0.0864373	-0.022633	-0.0111713	0.0415093	0.00627882	0.100421	NO
Q9NY27	Serine/threonine-protein phosphatase 4 regulatory subunit 2	PPP4R2	771540	663280	689070	522400	522060	791940	651980	666350	608130	545850	789284	685515	639865	593814	537282	1	0.859683	0.89311	0.677087	0.676647	1.023	0.888502	0.829335	0.769648	0.696377	0.0229982	0.0288186	-0.0637746	0.0925608	0.01973	0.100333	NO
Q12962	Transcription initiation factor TFIID subunit 10	TAF10	131830	124350	120010	95519	96845	134830	121120	121100	110850	97016	134378	127350	116287	108241	95493.3	1	0.94326	0.910339	0.724562	0.73462	1.01933	0.966016	0.882096	0.821061	0.724367	0.0193265	0.0227553	-0.0282426	0.0964996	-0.0102536	0.100085	NO
P27144	Adenylate kinase 4, mitochondrial	AK4	218270	197960	170500	140860	103150	230010	191670	183850	142270	108040	229239	201529	176543	138921	106344	1	0.90695	0.781143	0.645348	0.47258	1.05025	0.923299	0.808827	0.636464	0.487214	0.0502525	0.0163494	0.0276846	-0.00888397	0.0146343	0.100037	NO
Q9GZN8	UPF0687 protein C20orf27	C20orf27	45028	39739	39913	34238	28606	46411	40442	40094	34334	31721	46255.4	42522.1	38500.4	33525.8	31223.1	1	0.88254	0.886404	0.760371	0.635294	1.02726	0.944349	0.855033	0.744554	0.693416	0.0272575	0.0618091	-0.031371	-0.0158177	0.058122	0.0999999	NO
Q5F1R6	DnaJ homolog subfamily C member 21	DNAJC21	31616	25073	16866	12775	10535	35720	22985	19761	12000	9713.3	35600.2	24167.2	18975.6	11717.5	9560.84	1	0.793048	0.533464	0.404068	0.333217	1.12602	0.764399	0.600189	0.37062	0.302405	0.126019	-0.0286489	0.0667251	-0.0334478	-0.0308122	0.0998349	NO
Q9H9H4	Vacuolar protein sorting-associated protein 37B	VPS37B	103000	91690	95571	73756	67573	111150	88786	99515	80314	64767	110777	93352.7	95559.7	78423.4	63750.4	1	0.890194	0.927874	0.716078	0.656049	1.07551	0.906337	0.927764	0.761392	0.618936	0.0755071	0.0161429	-0.000109816	0.0453143	-0.0371123	0.0997422	NO
Q562E7	WD repeat-containing protein 81	WDR81	81201	77302	62718	40237	36641	92179	71121	66695	41340	35691	91869.9	74779.1	64044.1	40366.8	35130.8	1	0.951983	0.77238	0.495523	0.451238	1.13139	0.920914	0.788711	0.497122	0.43264	0.131388	-0.0310696	0.0163317	0.00159895	-0.0185982	0.0996511	NO
P30086	Phosphatidylethanolamine-binding protein 1;Hippocampal cholinergic neurostimulating peptide	PEBP1	1098900	988240	1003300	823120	901390	1155500	970710	957300	911290	958060	1.15162e+06	1.02064e+06	919251	889838	943023	1	0.899299	0.913004	0.74904	0.820266	1.04798	0.928782	0.836519	0.809753	0.858151	0.0479796	0.0294828	-0.0764844	0.0607133	0.0378857	0.0995769	NO
Q9UN36	Protein NDRG2	NDRG2	207180	178950	180230	139920	144730	215600	174180	173780	157790	155100	214877	183139	166873	154076	152666	1	0.863742	0.86992	0.675355	0.698571	1.03715	0.883961	0.805449	0.74368	0.736874	0.037151	0.020219	-0.0644707	0.0683249	0.0383029	0.0995271	NO
Q9H1H9	Kinesin-like protein KIF13A	KIF13A	434620	388040	374580	312090	314410	480060	371070	383430	339330	303590	478450	390156	368190	331342	298825	1	0.892826	0.861856	0.718076	0.723414	1.10085	0.897695	0.847154	0.762372	0.687555	0.100847	0.00486872	-0.014702	0.0442962	-0.0358591	0.0994506	NO
O15511	Actin-related protein 2/3 complex subunit 5	ARPC5	465560	399970	410780	298370	290350	433440	392840	429790	342680	324060	431986	413046	412708	334613	318974	1	0.859116	0.882335	0.640884	0.623658	0.927885	0.887202	0.886476	0.718733	0.68514	-0.0721145	0.0280861	0.00414043	0.0778485	0.0614822	0.0994427	NO
Q9UJY5	ADP-ribosylation factor-binding protein GGA1	GGA1	512470	465100	468580	395270	369780	537850	442600	489100	416220	390800	536046	465365	469660	406422	384666	1	0.907565	0.914356	0.771304	0.721564	1.04601	0.908083	0.916464	0.793065	0.750612	0.046005	0.000517494	0.00210801	0.0217612	0.0290478	0.0994396	NO
Q8WZA0	Protein LZIC	LZIC	463300	435980	423090	345320	381400	497960	418330	396250	389420	404460	496290	439847	380501	380253	398112	1	0.941032	0.91321	0.745349	0.823225	1.07121	0.949378	0.821284	0.820749	0.859296	0.0712065	0.00834636	-0.091926	0.0754001	0.036071	0.099098	NO
Q9HAU0	Pleckstrin homology domain-containing family A member 5	PLEKHA5	99445	87089	85490	68961	68771	102250	86066	88247	74139	71145	101907	90492.8	84739.5	72393.7	70028.3	1	0.87575	0.859671	0.693459	0.691548	1.02476	0.909979	0.852125	0.727978	0.704192	0.0247582	0.0342281	-0.00754643	0.0345189	0.0126435	0.0986023	NO
O95373	Importin-7	IPO7	1161900	1046300	1017300	786090	777750	1164400	998070	1012400	898940	857460	1.16049e+06	1.04941e+06	972161	877779	844002	1	0.900508	0.875549	0.676556	0.669378	0.998791	0.903181	0.8367	0.755468	0.726398	-0.00120928	0.00267311	-0.0388491	0.0789126	0.05702	0.0985473	NO
Q9BXR0	Queuine tRNA-ribosyltransferase	QTRT1	229900	201320	213670	155150	136090	243840	198980	211260	176910	133020	243022	209215	202863	172745	130932	1	0.875685	0.929404	0.674859	0.591953	1.05708	0.910024	0.882398	0.751394	0.569518	0.057078	0.0343391	-0.0470062	0.0765352	-0.0224352	0.0985111	NO
P19784	Casein kinase II subunit alpha	CSNK2A2	867600	803530	741470	495820	377930	821590	777690	785850	570360	430050	818835	817691	754616	556933	423300	1	0.926153	0.854622	0.571485	0.435604	0.943793	0.942474	0.869774	0.641924	0.487898	-0.0562072	0.0163216	0.0151518	0.0704397	0.0522937	0.0979996	YES
Q12959	Disks large homolog 1	DLG1	324750	298770	299300	248410	236380	320340	300080	302420	256870	267590	319266	315515	290400	250823	263390	1	0.92	0.921632	0.764927	0.727883	0.983112	0.971562	0.894226	0.772358	0.811055	-0.0168878	0.0515617	-0.0274055	0.00743081	0.0831716	0.0978707	NO
P07737	Profilin-1	PFN1	1515500	1441800	1341500	1197700	1123900	1572000	1406200	1344700	1203600	1276900	1.56673e+06	1.47853e+06	1.29125e+06	1.17527e+06	1.25686e+06	1	0.951369	0.885186	0.7903	0.741603	1.0338	0.975604	0.852031	0.775498	0.829336	0.0338027	0.024235	-0.0331549	-0.0148026	0.0877322	0.0978123	NO
P53611	Geranylgeranyl transferase type-2 subunit beta	RABGGTB	170710	151460	142480	108580	91882	173100	152800	146690	114100	97889	172519	160659	140860	111414	96352.6	1	0.887236	0.834632	0.636049	0.538234	1.0106	0.941124	0.82514	0.652651	0.564422	0.0105997	0.0538884	-0.00949167	0.0166014	0.0261881	0.0977859	NO
Q13905	Rap guanine nucleotide exchange factor 1	RAPGEF1	116380	109160	104010	89355	82391	111690	113940	108340	98558	82578	111315	119801	104034	96237.9	81281.9	1	0.937962	0.89371	0.767787	0.707948	0.956482	1.02939	0.893916	0.826928	0.698418	-0.0435176	0.0914291	0.000205633	0.0591416	-0.00953017	0.0977286	NO
Q02218	2-oxoglutarate dehydrogenase, mitochondrial	OGDH	480300	437980	373280	238270	164130	509810	420610	405890	242660	166340	508100	442244	389758	236948	163729	1	0.911888	0.777181	0.496086	0.341724	1.05788	0.920766	0.811488	0.493333	0.340889	0.057881	0.00887808	0.0343068	-0.00275314	-0.000834531	0.0974782	NO
Q9H7Z7	Prostaglandin E synthase 2;Prostaglandin E synthase 2 truncated form	PTGES2	172860	144920	132250	102660	83615	182530	144650	135420	109010	83952	181918	152090	130038	106444	82634.3	1	0.838366	0.76507	0.593891	0.483715	1.0524	0.879846	0.752271	0.615781	0.478042	0.0523999	0.0414792	-0.0127987	0.0218897	-0.0056733	0.0972968	NO
A4D126	Isoprenoid synthase domain-containing protein	ISPD	147660	142250	133720	115710	111350	153480	129830	138350	122110	125450	152965	136508	132851	119235	123481	1	0.963362	0.905594	0.783625	0.754097	1.03593	0.924474	0.89971	0.8075	0.836252	0.035929	-0.0388878	-0.00588407	0.0238756	0.0821548	0.0971875	NO
Q9NV35	Probable 8-oxo-dGTP diphosphatase NUDT15	NUDT15	195230	166190	172870	119810	118020	191190	159540	173560	141660	129850	190549	167746	166662	138325	127812	1	0.851252	0.885468	0.613686	0.604518	0.976022	0.859222	0.853669	0.708525	0.654674	-0.0239779	0.00796991	-0.0317999	0.0948382	0.0501558	0.0971861	NO
Q5VT52	Regulation of nuclear pre-mRNA domain-containing protein 2	RPRD2	292050	266490	256700	189370	173650	299250	252830	270900	213050	177170	298246	265834	260133	208035	174389	1	0.912481	0.878959	0.648416	0.59459	1.02122	0.910236	0.890713	0.712326	0.597121	0.0212169	-0.00224499	0.0117543	0.0639093	0.00253104	0.0971665	NO
Q9BR76	Coronin-1B	CORO1B	744850	613450	582930	457440	469920	711380	614730	574990	552520	501700	708994	646349	552137	539513	493825	1	0.823589	0.782614	0.614137	0.630892	0.951862	0.867757	0.741272	0.724325	0.662986	-0.0481382	0.0441683	-0.0413419	0.110188	0.0320943	0.0969703	NO
Q9NPG3	Ubinuclein-1	UBN1	94273	80824	81410	68195	63626	91236	79574	86612	76192	66337	90930	83666.9	83169.5	74398.4	65295.8	1	0.85734	0.863556	0.723378	0.674912	0.964539	0.887496	0.88222	0.78918	0.692625	-0.0354606	0.030156	0.0186642	0.0658025	0.0177123	0.0968745	NO
Q5JTD0	Tight junction-associated protein 1	TJAP1	72011	59623	43606	27444	24360	77749	52709	46524	29645	27928	77488.3	55420.1	44674.9	28947.1	27489.7	1	0.827971	0.605546	0.381108	0.338282	1.07606	0.769606	0.620389	0.401982	0.381742	0.0760613	-0.0583648	0.014843	0.0208738	0.0434607	0.0968741	NO
Q9H3P7	Golgi resident protein GCP60	ACBD3	340620	290360	259300	194820	179810	353190	281300	269260	216130	183320	352006	295769	258558	211042	180443	1	0.852446	0.761259	0.571957	0.52789	1.03343	0.868325	0.759081	0.619583	0.529748	0.0334258	0.015879	-0.00217831	0.0476255	0.00185738	0.0966094	NO
Q86WR0	Coiled-coil domain-containing protein 25	CCDC25	309370	280600	274900	225360	225020	320650	273400	274740	246660	237120	319575	287462	263820	240854	233398	1	0.907005	0.88858	0.728448	0.727349	1.03299	0.929186	0.852766	0.778529	0.754431	0.0329852	0.0221818	-0.035814	0.0500808	0.0270816	0.0965154	NO
P49137	MAP kinase-activated protein kinase 2	MAPKAPK2	488660	413100	377670	299920	281120	491280	394770	400230	329310	301640	489632	415075	384323	321558	296906	1	0.845373	0.772869	0.61376	0.575288	1.00199	0.849415	0.786482	0.65804	0.607591	0.00198991	0.00404178	0.0136138	0.04428	0.0323037	0.0962292	YES
P35626	Beta-adrenergic receptor kinase 2	ADRBK2	7040.9	6390.6	6169.3	5371.1	4702.1	7100.1	6473.7	7248.4	5354	4347.8	7076.29	6806.68	6960.31	5227.96	4279.56	1	0.90764	0.876209	0.762843	0.667827	1.00503	0.966734	0.988553	0.742514	0.607814	0.0050261	0.0590941	0.112344	-0.0203292	-0.0600125	0.096123	YES
P15374	Ubiquitin carboxyl-terminal hydrolase isozyme L3	UCHL3	308060	285340	269840	156310	103080	312840	287650	274950	182850	96886	311791	302445	264022	178546	95365.3	1	0.926248	0.875933	0.507401	0.33461	1.01211	0.981774	0.857047	0.579581	0.309567	0.0121107	0.0555259	-0.0188864	0.0721795	-0.0250428	0.095887	NO
Q13137	Calcium-binding and coiled-coil domain-containing protein 2	CALCOCO2	161580	137690	147770	121590	106440	162320	136780	153500	128850	113490	161776	143815	147399	125817	111709	1	0.852148	0.914532	0.752506	0.658745	1.00121	0.890056	0.912235	0.778666	0.691352	0.0012107	0.0379088	-0.00229603	0.0261592	0.0326073	0.09559	NO
Q9UKT5	F-box only protein 4	FBXO4	309580	282570	290800	226420	223360	315360	273590	286800	256320	238370	314302	287662	275401	250286	234629	1	0.912753	0.939337	0.731378	0.721494	1.01525	0.929201	0.889595	0.80847	0.757893	0.0152541	0.0164486	-0.049742	0.0770919	0.0363997	0.0954523	NO
Q13610	Periodic tryptophan protein 1 homolog	PWP1	59513	39424	38071	30326	31530	58261	36974	37156	39528	33858	58065.6	38875.8	35679.2	38597.5	33326.6	1	0.662443	0.639709	0.509569	0.5298	0.975679	0.653231	0.599519	0.648556	0.559988	-0.0243206	-0.00921205	-0.0401895	0.138986	0.0301879	0.0954521	NO
P61960	Ubiquitin-fold modifier 1	UFM1	167650	139040	137670	102860	96705	158060	140930	141830	130350	92188	157530	148179	136193	127281	90741	1	0.829347	0.821175	0.61354	0.576827	0.939636	0.883858	0.812364	0.75921	0.541253	-0.0603644	0.0545109	-0.00881096	0.14567	-0.0355739	0.0954313	NO
A6NGB9	WAS/WASL-interacting protein family member 3	WIPF3	111030	101770	94475	81697	75156	114710	97309	96605	83281	85334	114325	102314	92765.3	81320.5	83994.6	1	0.916599	0.850896	0.73581	0.676898	1.02968	0.9215	0.835498	0.732419	0.756504	0.0296793	0.00490051	-0.0153981	-0.00339075	0.0796057	0.0953967	NO
P51991	Heterogeneous nuclear ribonucleoprotein A3	HNRNPA3	753270	664430	553960	364020	252220	829420	624860	582650	401370	228130	826638	657000	559492	391922	224549	1	0.882061	0.735407	0.483253	0.334833	1.0974	0.872197	0.742751	0.520294	0.298099	0.0973998	-0.00986396	0.00734407	0.0370406	-0.0367341	0.0951864	NO
Q9NY33	Dipeptidyl peptidase 3	DPP3	1171300	1039400	1079400	846030	876650	1203500	1010000	1050100	943220	947640	1.19946e+06	1.06195e+06	1.00836e+06	921016	932766	1	0.88739	0.92154	0.7223	0.748442	1.02404	0.906642	0.860892	0.78632	0.796351	0.0240449	0.0192517	-0.0606481	0.0640196	0.0479093	0.0945773	NO
Q96RL1	BRCA1-A complex subunit RAP80	UIMC1	242520	231190	211310	205980	160570	286910	220440	224440	184940	163210	285948	231778	215519	180586	160648	1	0.953282	0.87131	0.849332	0.66209	1.17907	0.955708	0.888667	0.744625	0.662413	0.179069	0.00242605	0.0173571	-0.104707	0.000322869	0.0944677	NO
Q13426	DNA repair protein XRCC4	XRCC4	352850	320170	315850	263400	247210	350380	314000	328510	279880	268900	349205	330151	315453	273291	264679	1	0.907383	0.89514	0.746493	0.700609	0.98967	0.935669	0.894015	0.774526	0.750119	-0.0103304	0.0282858	-0.00112489	0.0280331	0.0495095	0.0943731	NO
P53041	Serine/threonine-protein phosphatase 5	PPP5C	1225700	1122200	1093600	848560	891290	1198400	1092800	1103800	961700	969820	1.19438e+06	1.14901e+06	1.05993e+06	939061	954598	1	0.915558	0.892225	0.692306	0.727168	0.974448	0.93743	0.864754	0.766143	0.778819	-0.025552	0.0218719	-0.0274712	0.0738363	0.0516505	0.0943354	NO
Q08257	Quinone oxidoreductase	CRYZ	681690	620670	630410	508990	530280	661220	601920	623960	591610	576610	659002	632880	599160	577683	567560	1	0.910487	0.924775	0.746659	0.77789	0.966719	0.928398	0.878933	0.847428	0.832577	-0.0332813	0.0179111	-0.0458417	0.100769	0.0546872	0.0942443	NO
Q8WTS6	Histone-lysine N-methyltransferase SETD7	SETD7	243800	231490	219720	179480	168060	241950	227190	234850	190740	176470	241139	238876	225516	186250	173700	1	0.949508	0.901231	0.736177	0.689336	0.989084	0.979801	0.925003	0.763945	0.71247	-0.0109165	0.0302935	0.0237723	0.0277682	0.0231344	0.094052	NO
P53990	IST1 homolog	IST1	516720	472250	483290	380580	386140	511000	459580	482000	422960	425880	509286	483219	462842	413003	419196	1	0.913938	0.935303	0.73653	0.747291	0.985614	0.935165	0.895732	0.799279	0.811262	-0.0143864	0.0212273	-0.0395717	0.0627483	0.0639718	0.0939893	NO
P63104	14-3-3 protein zeta/delta	YWHAZ	2195100	1912600	2001500	1611200	1702600	2282900	1831600	1935500	1846100	1795100	2.27524e+06	1.92581e+06	1.85857e+06	1.80264e+06	1.76692e+06	1	0.871304	0.911804	0.733998	0.775637	1.03651	0.877322	0.846691	0.821212	0.80494	0.0365103	0.00601733	-0.0651124	0.0872133	0.0293037	0.0939323	NO
Q9NYB0	Telomeric repeat-binding factor 2-interacting protein 1	TERF2IP	341060	285300	281290	186520	131060	351910	278820	296180	202650	133150	350730	293161	284408	197880	131060	1	0.83651	0.824752	0.546883	0.384273	1.02835	0.859559	0.833895	0.58019	0.384273	0.0283522	0.0230492	0.00914228	0.0333065	3.38356e-07	0.0938505	NO
Q12955	Ankyrin-3	ANK3	53061	47253	47093	40249	35831	57479	47118	49446	41952	33722	57286.2	49541.5	47480.7	40964.4	33192.7	1	0.890541	0.887526	0.758542	0.675279	1.07963	0.933671	0.894833	0.772025	0.625558	0.0796297	0.04313	0.00730716	0.0134832	-0.0497218	0.0938282	NO
P30626	Sorcin	SRI	357350	322690	326750	272900	285500	376370	316170	322710	300600	292310	375108	332432	309884	293524	287722	1	0.903008	0.91437	0.763677	0.798937	1.04969	0.930271	0.867171	0.82139	0.805155	0.0496929	0.0272625	-0.0471985	0.057713	0.00621795	0.0936878	NO
Q9BRT9	DNA replication complex GINS protein SLD5;DNA replication complex GINS protein SLD5, N-terminally processed	GINS4	243850	223580	218770	168510	160710	258270	215960	214070	183840	171410	257404	227068	205562	179512	168720	1	0.916875	0.89715	0.69104	0.659053	1.05558	0.931179	0.842984	0.736159	0.691899	0.0555827	0.0143036	-0.0541661	0.0451192	0.0328464	0.0936858	NO
Q9BQA1	Methylosome protein 50	WDR77	388080	364750	348480	309100	297090	403220	342130	376580	318990	314070	401868	359728	361612	311481	309140	1	0.939884	0.897959	0.796485	0.765538	1.03553	0.926942	0.931799	0.80262	0.796589	0.035528	-0.0129419	0.0338397	0.00613487	0.0310514	0.0936121	NO
Q9UHY7	Enolase-phosphatase E1	ENOPH1	379240	353410	349190	260860	271140	369570	342610	348060	303120	295180	368331	360232	334226	295984	290547	1	0.93189	0.920763	0.687849	0.714956	0.971233	0.949879	0.881305	0.780467	0.766129	-0.0287666	0.0179891	-0.0394577	0.0926179	0.0511732	0.093556	NO
Q5R372	Rab GTPase-activating protein 1-like	RABGAP1L	294500	270460	266210	220110	207190	299730	257960	276070	237770	222280	298725	271228	265097	232173	218791	1	0.91837	0.903939	0.747402	0.703531	1.01435	0.920979	0.900161	0.788363	0.742924	0.0143456	0.00260853	-0.00377808	0.0409602	0.0393927	0.093529	NO
P38646	Stress-70 protein, mitochondrial	HSPA9	2645100	2380100	2440600	1991200	2043500	2766600	2295700	2395100	2173700	2188700	2.75732e+06	2.41378e+06	2.2999e+06	2.12253e+06	2.15435e+06	1	0.899815	0.922687	0.752788	0.772561	1.04243	0.912548	0.869496	0.802438	0.814467	0.0424262	0.0127329	-0.0531909	0.0496503	0.0419065	0.0935249	NO
Q8N0W3	L-fucose kinase	FUK	378230	328200	320740	264360	206450	458490	294510	328670	272710	187770	456952	309658	315607	266290	184823	1	0.867726	0.848003	0.69894	0.545832	1.20813	0.818703	0.834431	0.704043	0.488652	0.208134	-0.0490226	-0.0135718	0.00510344	-0.05718	0.0934625	NO
Q92530	Proteasome inhibitor PI31 subunit	PSMF1	409360	382540	366640	309870	285040	429280	360380	396750	326580	289610	427840	378916	380981	318892	285064	1	0.934483	0.895642	0.756962	0.696306	1.04514	0.925631	0.930674	0.779002	0.696366	0.0451444	-0.00885235	0.0350323	0.0220396	5.95165e-05	0.0934235	NO
Q9GZT9	Egl nine homolog 1	EGLN1	411950	400220	366030	286580	247120	397970	402540	378880	304820	273270	396635	423245	363821	297644	268981	1	0.971526	0.88853	0.695667	0.599879	0.962824	1.02742	0.883168	0.722526	0.652945	-0.0371761	0.055892	-0.0053621	0.0268586	0.0530667	0.0932791	NO
Q9H081	Protein MIS12 homolog	MIS12	189070	160160	156380	115560	119340	192290	152260	148020	137790	131780	191645	160092	142137	134546	129712	1	0.847094	0.827101	0.611202	0.631195	1.01362	0.846731	0.751768	0.711622	0.686051	0.0136199	-0.00036221	-0.0753329	0.10042	0.054856	0.0932005	NO
Q92945	Far upstream element-binding protein 2	KHSRP	1691400	1519900	1508900	1286400	1204000	1741900	1489200	1527300	1361000	1291000	1.73606e+06	1.5658e+06	1.4666e+06	1.32896e+06	1.27074e+06	1	0.898605	0.892101	0.760553	0.711836	1.0264	0.92574	0.86709	0.785717	0.751293	0.0264031	0.0271356	-0.0250112	0.0251634	0.0394566	0.0931475	NO
Q16621	Transcription factor NF-E2 45 kDa subunit	NFE2	45022	41391	36223	23021	25126	43102	41955	38435	27414	24616	42957.4	44113	36907.4	26768.7	24229.6	1	0.919351	0.804562	0.511328	0.558083	0.954143	0.979809	0.819763	0.594568	0.538173	-0.0458565	0.0604585	0.0152007	0.0832407	-0.0199095	0.0931339	NO
Q9UPR0	Inactive phospholipase C-like protein 2	PLCL2	113110	103480	87926	74894	59042	119400	100780	96151	74095	60279	119000	105964	92329.4	72350.8	59332.9	1	0.914862	0.777349	0.662134	0.521987	1.05207	0.936819	0.81628	0.63965	0.524559	0.0520694	0.0219577	0.0389302	-0.0224846	0.00257164	0.0930443	NO
O95352	Ubiquitin-like modifier-activating enzyme ATG7	ATG7	269860	249280	248350	215870	201420	290600	244000	243190	216430	222340	289625	256550	233524	211335	218850	1	0.923738	0.920292	0.799933	0.746387	1.07324	0.950679	0.865353	0.783129	0.810977	0.0732432	0.0269406	-0.0549389	-0.0168045	0.0645898	0.0930302	NO
Q8IWT0	Protein archease	ZBTB8OS	126690	113510	116840	94117	92640	131960	113210	116300	101760	95488	131517	119033	111678	99364.5	93989.2	1	0.895967	0.922251	0.742892	0.731234	1.0381	0.939561	0.881503	0.784312	0.741884	0.0381044	0.0435944	-0.0407486	0.0414202	0.01065	0.0930203	NO
Q99766	ATP synthase subunit s, mitochondrial	ATP5S	55808	50010	46439	35880	34650	55423	48138	50917	41193	33536	55237.1	50614	48893.3	40223.3	33009.6	1	0.896108	0.832121	0.642919	0.620879	0.989771	0.906931	0.876098	0.720744	0.591486	-0.0102292	0.0108226	0.0439768	0.0778257	-0.0293931	0.0930027	NO
O14908	PDZ domain-containing protein GIPC1	GIPC1	110920	83378	56707	34985	25495	123320	75713	64802	32951	25275	122906	79607.3	62226.4	32175.3	24878.3	1	0.751695	0.511242	0.315408	0.22985	1.10806	0.7177	0.561002	0.290077	0.22429	0.108064	-0.0339947	0.0497601	-0.0253307	-0.00555995	0.0929384	NO
Q9C0D3	Protein zyg-11 homolog B	ZYG11B	205620	185210	177590	149510	129090	216180	176680	185580	155710	136770	215455	185768	178204	152045	134623	1	0.900739	0.863681	0.727118	0.627809	1.04783	0.903451	0.866666	0.739444	0.654719	0.0478309	0.00271162	0.0029859	0.0123262	0.0269103	0.0927649	NO
Q15642	Cdc42-interacting protein 4	TRIP10	574950	544490	524870	453300	428180	585750	541160	531400	484340	450170	583786	568995	510279	472938	443104	1	0.947021	0.912897	0.788416	0.744726	1.01537	0.989642	0.887519	0.822573	0.770683	0.0153675	0.0426205	-0.0253778	0.0341567	0.0259575	0.0927244	NO
Q6GYQ0	Ral GTPase-activating protein subunit alpha-1	RALGAPA1	44101	36884	29808	20620	19285	45513	32402	32727	23094	21722	45360.4	34068.6	31426.2	22550.4	21381.1	1	0.836353	0.675903	0.467563	0.437292	1.02856	0.772513	0.712597	0.511334	0.48482	0.0285563	-0.0638398	0.0366939	0.0437713	0.0475286	0.0927102	NO
Q9BQE3	Tubulin alpha-1C chain	TUBA1C	352410	265720	243700	169160	164150	378090	246760	249300	191190	168090	376822	259452	239391	186689	165452	1	0.754008	0.691524	0.480009	0.465793	1.06927	0.736222	0.679298	0.52975	0.469486	0.0692716	-0.0177857	-0.0122262	0.0497412	0.00369373	0.0926946	NO
O00418	Eukaryotic elongation factor 2 kinase	EEF2K	210450	195570	181130	138700	132780	221030	191990	180020	157750	131120	220289	201865	172865	154036	129062	1	0.929294	0.860679	0.659064	0.630934	1.04675	0.959207	0.821406	0.731939	0.613267	0.0467509	0.0299123	-0.0392732	0.0728747	-0.017667	0.0925977	YES
P40121	Macrophage-capping protein	CAPG	260150	249470	244300	201560	202810	255110	239200	252390	216230	226640	254254	251503	242359	211140	223083	1	0.958947	0.939074	0.774784	0.779589	0.977338	0.966763	0.931611	0.811608	0.857516	-0.0226622	0.00781583	-0.00746286	0.0368243	0.0779271	0.0924421	NO
P35998	26S protease regulatory subunit 7	PSMC2	1430600	1278800	1263000	961240	1019500	1556100	1161200	1214600	1150000	1040600	1.55088e+06	1.22093e+06	1.16632e+06	1.12293e+06	1.02427e+06	1	0.893891	0.882846	0.671914	0.712638	1.08408	0.853437	0.81527	0.784935	0.71597	0.0840775	-0.040454	-0.0675768	0.113021	0.00333219	0.0924003	NO
P54278	Mismatch repair endonuclease PMS2	PMS2	291010	253880	249740	199670	182540	291410	243760	257110	219010	199370	290433	256298	246891	213854	196241	1	0.87241	0.858184	0.686128	0.627264	0.998016	0.880718	0.848393	0.73487	0.674344	-0.0019838	0.00830842	-0.00979026	0.048742	0.04708	0.0923563	NO
Q03188	Centromere protein C	CENPC	260900	231790	227530	199280	184820	270060	228340	226680	212040	197550	269154	240085	217670	207048	194449	1	0.888425	0.872097	0.763818	0.708394	1.03164	0.920217	0.834306	0.793593	0.745302	0.0316378	0.0317927	-0.0377907	0.0297757	0.0369081	0.0923235	NO
P18859	ATP synthase-coupling factor 6, mitochondrial	ATP5J	47144	41586	42909	36682	34420	48288	41497	46212	38029	34365	48126.1	43631.4	44375.3	37133.8	33825.6	1	0.882106	0.910169	0.778084	0.730104	1.02083	0.925492	0.941271	0.787667	0.717496	0.020831	0.0433863	0.0311018	0.00958296	-0.0126078	0.0922942	NO
Q8IVB5	LIX1-like protein	LIX1L	87397	74235	63894	42680	27897	91563	73809	66907	43604	28910	91255.9	77605.4	64247.7	42577.5	28456.2	1	0.8494	0.731078	0.488346	0.319199	1.04415	0.887964	0.735125	0.487174	0.325597	0.044154	0.038564	0.00404731	-0.00117234	0.00639881	0.0919917	NO
P15336	Cyclic AMP-dependent transcription factor ATF-2	ATF2	81570	75447	73072	60674	55290	80106	68523	79598	63381	64326	79837.3	72047.5	76434.3	61889	63316.4	1	0.924936	0.89582	0.743827	0.677823	0.978759	0.88326	0.937039	0.758722	0.776221	-0.0212413	-0.041676	0.0412199	0.0148949	0.0983984	0.091596	NO
Q9UKL6	Phosphatidylcholine transfer protein	PCTP	285540	259100	260110	211320	225820	283460	259800	255420	238610	237820	282509	273163	245268	232993	234087	1	0.907404	0.910941	0.740071	0.790852	0.989386	0.956654	0.858962	0.815973	0.819805	-0.0106137	0.04925	-0.0519783	0.0759018	0.028953	0.0915128	NO
Q5VUA4	Zinc finger protein 318	ZNF318	1242000	1099200	1107700	869350	823330	1254600	1072900	1137800	941790	878300	1.25039e+06	1.12808e+06	1.09258e+06	919620	864514	1	0.885024	0.891868	0.69996	0.662907	1.00676	0.908281	0.879692	0.740435	0.696066	0.00675719	0.0232567	-0.0121762	0.0404749	0.0331598	0.0914723	NO
Q8TBC4	NEDD8-activating enzyme E1 catalytic subunit	UBA3	547240	498150	499320	409170	402730	564490	482110	499190	445180	429730	562597	506907	479349	434700	422985	1	0.910295	0.912433	0.747698	0.735929	1.02806	0.926298	0.87594	0.79435	0.772943	0.0280624	0.0160029	-0.0364936	0.0466527	0.0370132	0.0912376	NO
Q9UHB4	NADPH-dependent diflavin oxidoreductase 1	NDOR1	85882	79103	67929	51607	43659	91703	77006	73503	52939	42022	91395.5	80966.8	70581.6	51692.8	41362.4	1	0.921066	0.790957	0.600906	0.50836	1.0642	0.942768	0.821843	0.601905	0.481619	0.064198	0.0217021	0.0308861	0.000998931	-0.0267409	0.0910441	NO
O75629	Protein CREG1	CREG1	62268	55357	57834	43613	44774	62662	55972	52530	49277	50442	62451.8	58850.9	50442.1	48117	49650.3	1	0.889012	0.928792	0.700408	0.719053	1.00295	0.945123	0.810081	0.77274	0.797364	0.00295255	0.0561111	-0.11871	0.0723324	0.0783111	0.090997	NO
P61224	Ras-related protein Rap-1b;Ras-related protein Rap-1b-like protein	RAP1B	465570	408690	425010	341460	335050	475910	383010	438560	381000	353420	474314	402710	421129	372031	347873	1	0.877827	0.912881	0.733424	0.719655	1.01878	0.864983	0.904545	0.799087	0.747198	0.0187811	-0.0128441	-0.00833592	0.0656638	0.0275422	0.0908071	NO
O95873	Uncharacterized protein C6orf47	C6orf47	18046	17738	14675	14160	12244	21552	16330	15771	14016	11197	21479.7	17169.9	15144.2	13686.1	11021.3	1	0.982933	0.8132	0.784661	0.678488	1.19028	0.951454	0.839198	0.758398	0.610731	0.190276	-0.0314787	0.0259984	-0.0262631	-0.0677571	0.0907756	NO
Q96RN5	Mediator of RNA polymerase II transcription subunit 15	MED15	180550	165640	164130	136520	131110	192290	160600	167610	142510	135860	191645	168860	160948	139155	133728	1	0.917419	0.909056	0.756134	0.72617	1.06145	0.935256	0.891433	0.77073	0.740668	0.0614518	0.0178371	-0.0176229	0.0145957	0.0144978	0.0907595	NO
P60842	Eukaryotic initiation factor 4A-I	EIF4A1	2857300	2549600	2078300	1532500	1535000	3185600	2325600	2021900	1783100	1532800	3.17492e+06	2.44522e+06	1.94154e+06	1.74112e+06	1.50874e+06	1	0.892311	0.727365	0.536346	0.53722	1.11116	0.855779	0.679501	0.60936	0.528031	0.11116	-0.0365318	-0.0478641	0.0730147	-0.00918993	0.0905885	NO
Q8TDY2	RB1-inducible coiled-coil protein 1	RB1CC1	296430	259010	250850	203750	153290	336630	251630	265710	203240	138680	335501	264573	255149	198456	136503	1	0.873764	0.846237	0.687346	0.51712	1.13181	0.89253	0.86074	0.669486	0.460491	0.131805	0.0187654	0.014503	-0.0178604	-0.0566295	0.0905837	NO
O60907	F-box-like/WD repeat-containing protein TBL1X	TBL1X	238540	221090	197150	138110	111120	238910	200790	194420	165870	131800	238109	211118	186693	161965	129731	1	0.926847	0.826486	0.57898	0.465834	0.998192	0.885041	0.782647	0.678986	0.543856	-0.00180781	-0.0418057	-0.0438392	0.100006	0.0780217	0.0905747	NO
Q3KQV9	UDP-N-acetylhexosamine pyrophosphorylase-like protein 1	UAP1L1	191620	171300	170360	136650	130540	200130	163880	177780	144630	136180	199459	172309	170714	141225	134043	1	0.893957	0.889051	0.71313	0.681244	1.04091	0.899223	0.890899	0.737007	0.699523	0.0409082	0.00526664	0.00184729	0.0238772	0.0182787	0.0901779	NO
P51159	Ras-related protein Rab-27A	RAB27A	25097	24602	21198	17817	13910	25196	24144	23668	17395	14907	25111.5	25385.9	22727.3	16985.5	14673	1	0.980277	0.844643	0.709925	0.55425	1.00058	1.01151	0.905578	0.676795	0.584653	0.00057775	0.0312328	0.0609354	-0.0331309	0.030403	0.090018	NO
P06744	Glucose-6-phosphate isomerase	GPI	2785400	2674400	2522800	1943500	1980600	2766100	2608500	2521400	2149400	2172000	2.75682e+06	2.74267e+06	2.42118e+06	2.0988e+06	2.13791e+06	1	0.960149	0.905723	0.697745	0.711065	0.989741	0.984659	0.869241	0.753501	0.767541	-0.0102595	0.0245094	-0.0364814	0.0557558	0.0564762	0.0900006	NO
P27797	Calreticulin	CALR	2376600	1954900	1762400	966950	737550	2478100	1862200	1811900	1162000	720880	2.46979e+06	1.95798e+06	1.73988e+06	1.13465e+06	709565	1	0.822562	0.741564	0.406863	0.310338	1.03921	0.823859	0.73209	0.477424	0.298563	0.0392111	0.00129704	-0.00947385	0.0705613	-0.0117751	0.0898205	NO
Q9H6Z4	Ran-binding protein 3	RANBP3	638470	593030	585440	478830	493600	665910	578870	595700	520610	501880	663677	608644	572023	508355	494003	1	0.92883	0.916942	0.749965	0.773098	1.03948	0.953286	0.895928	0.796207	0.773729	0.0394799	0.0244558	-0.0210137	0.0462427	0.000630623	0.0897953	NO
Q8WW01	tRNA-splicing endonuclease subunit Sen15	TSEN15	122970	107960	107910	80717	71377	132030	104190	106460	86262	75553	131587	109549	102229	84231.4	74367.1	1	0.877938	0.877531	0.656396	0.580442	1.07008	0.89086	0.83133	0.684975	0.604758	0.0700757	0.0129221	-0.0462011	0.0285789	0.024316	0.0896917	NO
Q9NRD1	F-box only protein 6	FBXO6	184490	174700	165580	140290	124210	194230	164810	170460	146890	133920	193579	173287	163685	143432	131818	1	0.946935	0.897501	0.760421	0.673261	1.04926	0.939276	0.887229	0.777452	0.7145	0.0492634	-0.0076588	-0.010272	0.0170315	0.0412382	0.0896023	NO
Q9BVL2	Nucleoporin p58/p45	NUPL1	225050	218870	200050	172360	164630	237980	203890	210600	177550	176670	237182	214377	202230	173370	173897	1	0.972539	0.888914	0.765874	0.731526	1.05391	0.952575	0.898598	0.770364	0.772704	0.0539075	-0.0199639	0.00968459	0.00448961	0.0411777	0.0892954	NO
Q86UW6	NEDD4-binding protein 2	N4BP2	219600	182050	159320	124290	119890	232720	170770	162310	139270	123350	231940	179554	155859	135992	121414	1	0.829007	0.725501	0.565984	0.545947	1.05619	0.817639	0.70974	0.619269	0.552887	0.0561909	-0.011368	-0.0157612	0.0532856	0.00693959	0.0892869	NO
Q9P2M7	Cingulin	CGN	45526	39846	36349	23201	18501	45660	38974	38722	24018	20689	45506.9	40978.6	37183	23452.6	20364.3	1	0.875236	0.798423	0.509621	0.406383	0.99958	0.900115	0.816741	0.515147	0.447311	-0.000420213	0.0248788	0.0183183	0.00552661	0.0409276	0.0892312	NO
Q9BX66	Sorbin and SH3 domain-containing protein 1	SORBS1	357610	333190	330480	264090	256380	349240	335130	348240	285090	264590	348069	352367	334399	278379	260437	1	0.931713	0.924135	0.738486	0.716926	0.973319	0.98534	0.935094	0.778443	0.728271	-0.0266806	0.0536268	0.0109586	0.0399565	0.011345	0.0892062	NO
O75503	Ceroid-lipofuscinosis neuronal protein 5	CLN5	63978	61428	55777	51393	48191	66008	59646	61190	49412	51779	65786.6	62713.9	58757.9	48248.8	50966.3	1	0.960143	0.871815	0.803292	0.753243	1.02827	0.980242	0.918409	0.754147	0.796622	0.0282695	0.0200991	0.0465934	-0.0491447	0.0433788	0.0891961	NO
P63098	Calcineurin subunit B type 1	PPP3R1	375280	326270	349070	258790	235140	361250	321960	357150	274220	273010	360038	338520	342955	267765	268725	1	0.869404	0.930159	0.689592	0.626572	0.959386	0.902047	0.913864	0.713507	0.716065	-0.0406138	0.0326425	-0.0162951	0.0239148	0.0894929	0.0891413	NO
P82979	SAP domain-containing ribonucleoprotein	SARNP	577570	516240	554560	451460	468970	564020	513890	563110	496680	499870	562128	540322	540729	484988	492024	1	0.893814	0.960161	0.781654	0.811971	0.973265	0.935509	0.936213	0.839704	0.851887	-0.0267354	0.0416954	-0.0239474	0.05805	0.0399158	0.0889784	NO
Q96FZ2	Embryonic stem cell-specific 5-hydroxymethylcytosine-binding protein	HMCES	310310	266220	256980	187220	175890	315270	258120	262710	210790	183380	314213	271396	252268	205828	180502	1	0.857916	0.82814	0.603332	0.56682	1.01258	0.874598	0.812956	0.663298	0.581682	0.0125767	0.0166815	-0.0151837	0.0599655	0.0148617	0.0889017	NO
Q5T0N5	Formin-binding protein 1-like	FNBP1L	136090	123780	125190	108460	98135	144810	121490	130780	108760	101490	144324	127739	125582	106200	99897	1	0.909545	0.919906	0.796973	0.721104	1.06051	0.938635	0.922787	0.780364	0.734051	0.0605066	0.02909	0.0028807	-0.0166086	0.0129476	0.0888164	NO
Q08999	Retinoblastoma-like protein 2	RBL2	16694	14817	13217	10827	8502.3	16791	15638	14013	10966	8325.9	16734.7	16442.3	13456	10707.9	8195.22	1	0.887564	0.791722	0.648556	0.509303	1.00244	0.984925	0.806041	0.641419	0.490908	0.00243727	0.0973609	0.014319	-0.00713699	-0.0183947	0.0885855	NO
P22033	Methylmalonyl-CoA mutase, mitochondrial	MUT	415030	372790	212550	115740	96081	405030	346230	277700	127390	91595	403672	364038	266663	124391	90157.4	1	0.898224	0.512132	0.278871	0.231504	0.972632	0.877138	0.642514	0.299716	0.217231	-0.0273676	-0.0210867	0.130382	0.0208447	-0.0142728	0.0885	NO
Q9BWT6	Meiotic nuclear division protein 1 homolog	MND1	83401	72855	71689	55841	47634	87751	70438	73669	61364	47334	87456.7	74061	70741	59919.5	46591.1	1	0.873551	0.85957	0.669548	0.571144	1.04863	0.888011	0.848203	0.71845	0.558639	0.048629	0.0144601	-0.0113672	0.0489018	-0.0125051	0.0881186	NO
Q8IWB7	WD repeat and FYVE domain-containing protein 1	WDFY1	242150	216250	197260	130100	112080	258520	208950	193610	153060	108140	257653	219697	185915	149457	106443	1	0.893042	0.814619	0.53727	0.462854	1.06402	0.907278	0.767767	0.617208	0.439573	0.0640223	0.0142365	-0.0468519	0.0799376	-0.0232803	0.0880641	NO
Q03111	Protein ENL	MLLT1	171280	149560	144480	118480	98032	189020	145130	141880	121840	102320	188386	152595	136241	118972	100714	1	0.87319	0.843531	0.691733	0.572349	1.09987	0.890908	0.795428	0.694604	0.588008	0.099872	0.0177183	-0.0481034	0.00287148	0.0156587	0.0880171	NO
Q5VWN6	Protein FAM208B	FAM208B	55130	50520	45389	37107	32730	52941	51137	50709	39030	32903	52763.5	53767.2	48693.5	38111.2	32386.6	1	0.916379	0.823309	0.673082	0.593688	0.957073	0.975281	0.883249	0.691297	0.587458	-0.0429267	0.0589015	0.0599406	0.0182154	-0.00622957	0.0879012	NO
Q8IVM0	Coiled-coil domain-containing protein 50	CCDC50	294440	260670	257980	209660	186280	282780	261150	270140	217180	210280	281832	274582	259403	212067	206980	1	0.885308	0.876172	0.712064	0.632659	0.957178	0.932558	0.881005	0.72024	0.70296	-0.0428215	0.04725	0.00483307	0.00817646	0.0703013	0.0877393	NO
Q8NCE0	tRNA-splicing endonuclease subunit Sen2	TSEN2	196740	170510	176810	144880	122760	202490	164440	186840	154220	126220	201811	172898	179414	150590	124239	1	0.866677	0.898699	0.736403	0.623971	1.02577	0.878815	0.911934	0.765424	0.631488	0.0257747	0.0121378	0.0132351	0.029021	0.00751696	0.0876856	NO
Q13526	Peptidyl-prolyl cis-trans isomerase NIMA-interacting 1	PIN1	190110	159510	110280	47803	36834	198970	150780	125260	49688	36118	198303	158535	120281	48518.3	35551.1	1	0.839041	0.580085	0.251449	0.193751	1.04309	0.833914	0.632694	0.255212	0.187003	0.0430946	-0.00512654	0.0526087	0.00376267	-0.00674819	0.0875912	NO
O00401	Neural Wiskott-Aldrich syndrome protein	WASL	129500	118170	119670	105060	90530	124930	119270	126330	109450	97695	124511	125405	121309	106873	96161.6	1	0.91251	0.924093	0.811274	0.699073	0.961475	0.968376	0.936748	0.825278	0.742561	-0.0385249	0.0558662	0.0126556	0.0140038	0.0434873	0.087488	NO
Q8N108	Mesoderm induction early response protein 1	MIER1	190650	166560	161960	135150	114750	196530	164930	179840	132650	116060	195871	173413	172692	129527	114238	1	0.873643	0.849515	0.708891	0.601888	1.02738	0.909589	0.905807	0.679399	0.599205	0.0273847	0.0359465	0.0562922	-0.029492	-0.00268369	0.0874477	NO
Q8N8N7	Prostaglandin reductase 2	PTGR2	307200	293500	289180	234230	240580	305720	283440	287030	269370	254150	304695	298019	275622	263029	250161	1	0.955404	0.941341	0.762467	0.783138	0.991845	0.970113	0.897206	0.856214	0.814326	-0.00815527	0.0147096	-0.044135	0.0937464	0.0311879	0.0873537	NO
Q16555	Dihydropyrimidinase-related protein 2	DPYSL2	468780	409730	413590	317890	298450	501570	389950	422280	352420	294480	499888	410007	405496	344124	289858	1	0.874035	0.882269	0.678122	0.636653	1.06636	0.874626	0.865003	0.734084	0.618324	0.0663592	0.000591193	-0.0172659	0.055962	-0.0183286	0.087318	NO
Q9UJU6	Drebrin-like protein	DBNL	776800	711180	702630	559450	553910	787800	693610	699240	614960	594750	785158	729286	671448	600484	585415	1	0.915525	0.904519	0.720198	0.713066	1.01076	0.938834	0.864377	0.773022	0.753624	0.0107595	0.0233084	-0.0401415	0.0528238	0.0405574	0.0873075	NO
Q9NZJ9	Diphosphoinositol polyphosphate phosphohydrolase 2;Diphosphoinositol polyphosphate phosphohydrolase 3-beta;Diphosphoinositol polyphosphate phosphohydrolase 3-alpha	NUDT4;NUDT11;NUDT10	319800	265250	257240	168070	156790	317890	261110	264510	200140	156730	316824	274540	253997	195429	154270	1	0.829425	0.804378	0.525547	0.490275	0.990694	0.858475	0.794236	0.611096	0.482395	-0.00930617	0.0290501	-0.0101413	0.0855491	-0.00787989	0.0872719	NO
P18085	ADP-ribosylation factor 4	ARF4	374180	339070	306810	216920	237750	359350	318870	336410	269560	231320	358145	335271	323039	263214	227689	1	0.906168	0.819953	0.579721	0.635389	0.957146	0.896016	0.863325	0.703443	0.608502	-0.0428541	-0.0101525	0.0433724	0.123722	-0.0268874	0.0872007	NO
Q14493	Histone RNA hairpin-binding protein	SLBP	111220	100300	88105	59823	56031	113970	97241	88159	69541	57687	113588	102243	84655	67904	56781.6	1	0.901816	0.792169	0.53788	0.503785	1.02129	0.919283	0.761149	0.610537	0.510534	0.0212891	0.0174663	-0.0310192	0.0726575	0.00674844	0.0871422	NO
Q9NZR1	Tropomodulin-2	TMOD2	175020	141010	140880	105400	99216	183020	130010	138740	122940	106060	182406	136697	133226	120046	104395	1	0.805679	0.804937	0.602217	0.566884	1.0422	0.781037	0.761202	0.685898	0.596476	0.0422021	-0.0246424	-0.0437341	0.0836815	0.0295927	0.0870997	NO
Q07817	Bcl-2-like protein 1	BCL2L1	50965	44728	45822	37855	34424	53836	44224	45437	38983	36962	53655.4	46498.7	43631.1	38065.3	36381.9	1	0.877622	0.899088	0.742765	0.675444	1.05279	0.912365	0.856099	0.746891	0.71386	0.0527901	0.0347428	-0.042989	0.00412678	0.0384157	0.0870864	NO
P14314	Glucosidase 2 subunit beta	PRKCSH	960790	840720	879330	716190	706490	959010	837960	891720	785810	738330	955794	881061	856278	767312	726741	1	0.87503	0.915216	0.745418	0.735322	0.9948	0.917017	0.891223	0.798626	0.7564	-0.00520014	0.0419869	-0.023993	0.0532079	0.0210778	0.0870796	NO
Q9BT30	Alpha-ketoglutarate-dependent dioxygenase alkB homolog 7, mitochondrial	ALKBH7	39238	35209	37078	36992	31635	47200	34746	37162	33155	32443	47041.7	36533.2	35685	32374.5	31933.8	1	0.897319	0.944951	0.94276	0.806234	1.19888	0.931066	0.909449	0.825081	0.813848	0.198881	0.033747	-0.0355022	-0.117679	0.00761466	0.0870619	NO
P51148	Ras-related protein Rab-5C	RAB5C	270250	240910	222500	165940	184090	290220	223350	209160	197440	192510	289247	234838	200847	192792	189488	1	0.891434	0.823312	0.614024	0.681184	1.07029	0.868966	0.743189	0.713385	0.70116	0.070293	-0.0224679	-0.080123	0.0993605	0.0199756	0.0870382	NO
P54687	Branched-chain-amino-acid aminotransferase, cytosolic	BCAT1	786280	705500	716300	577320	597160	749900	681590	742590	649460	649720	747385	716648	713075	634171	639522	1	0.897263	0.910999	0.734242	0.759475	0.950533	0.911441	0.906897	0.806547	0.813352	-0.049467	0.0141778	-0.00410145	0.0723043	0.0538767	0.0867902	NO
Q32MZ4	Leucine-rich repeat flightless-interacting protein 1	LRRFIP1	779050	674110	651970	476830	454980	773540	673730	695990	521190	454770	770946	708383	668327	508921	447632	1	0.865297	0.836878	0.612066	0.584019	0.989597	0.909291	0.857875	0.653258	0.574587	-0.0104027	0.0439938	0.0209964	0.0411924	-0.00943192	0.086348	NO
A0MZ66	Shootin-1	KIAA1598	1192700	1072300	1068700	878180	799530	1239800	1059100	1099800	935690	808110	1.23564e+06	1.11357e+06	1.05609e+06	913663	795426	1	0.899053	0.896034	0.736296	0.670353	1.036	0.933659	0.885459	0.766046	0.666912	0.0360041	0.0346063	-0.0105748	0.0297505	-0.00344082	0.0863453	NO
Q9Y4K3	TNF receptor-associated factor 6	TRAF6	95166	88272	56658	38496	40829	95752	83333	61878	45331	41557	95430.9	87619.2	59418.6	44263.9	40904.7	1	0.927558	0.59536	0.404514	0.429029	1.00278	0.920699	0.624368	0.465123	0.429825	0.0027833	-0.00685911	0.0290083	0.0606087	0.0007958	0.086337	NO
P34913	Bifunctional epoxide hydrolase 2;Cytosolic epoxide hydrolase 2;Lipid-phosphate phosphatase	EPHX2	466780	427920	431010	360400	354190	477870	410890	433910	387490	383260	476267	432024	416664	378368	377244	1	0.916749	0.923369	0.772098	0.758794	1.02033	0.925541	0.892634	0.810592	0.808185	0.0203251	0.00879256	-0.0307343	0.0384941	0.0493904	0.086268	NO
Q8NB15	Zinc finger protein 511	ZNF511	63336	52802	57542	49193	38209	71400	54792	58968	48254	34567	71160.5	57610.2	56624.3	47118.1	34024.4	1	0.833681	0.90852	0.776699	0.603275	1.12354	0.909597	0.89403	0.743938	0.537205	0.12354	0.0759163	-0.0144899	-0.0327606	-0.0660691	0.0861369	NO
O60568	Procollagen-lysine,2-oxoglutarate 5-dioxygenase 3	PLOD3	237180	204010	198220	162030	129020	227990	192920	220880	179270	135740	227225	202843	212101	175050	133609	1	0.860148	0.835737	0.683152	0.543975	0.958029	0.855228	0.894261	0.738047	0.563325	-0.0419707	-0.00492086	0.0585249	0.0548946	0.0193501	0.085878	NO
Q9BPX7	UPF0415 protein C7orf25	C7orf25	93745	84764	74004	53548	39540	95012	81350	81146	55758	41709	94693.4	85534.2	77920.8	54445.4	41054.3	1	0.904198	0.789418	0.571209	0.421782	1.01012	0.912414	0.831199	0.580782	0.437936	0.0101163	0.00821644	0.0417812	0.00957309	0.0161539	0.085841	NO
O15498	Synaptobrevin homolog YKT6	YKT6	350360	330660	294430	226140	219900	352160	314570	302150	245770	243510	350979	330750	290141	239984	239688	1	0.943772	0.840364	0.64545	0.62764	1.00177	0.944029	0.828122	0.684965	0.684119	0.00176663	0.000256756	-0.0122423	0.0395149	0.0564789	0.0857749	NO
P51946	Cyclin-H	CCNH	222520	194380	191810	129230	104640	232280	187790	203510	142220	99983	231501	197449	195421	138872	98413.7	1	0.873539	0.86199	0.580757	0.47025	1.04036	0.887332	0.878219	0.624088	0.442269	0.0403604	0.0137921	0.0162292	0.0433313	-0.0279809	0.085732	NO
Q9NUG6	p53 and DNA damage-regulated protein 1	PDRG1	191090	154720	151020	101430	92132	199050	142200	160980	116900	91581	198382	149514	154582	114148	90143.6	1	0.809671	0.790308	0.530797	0.482139	1.03816	0.782428	0.808947	0.597353	0.471734	0.0381623	-0.0272433	0.0186389	0.0665556	-0.0104057	0.0857079	NO
Q13216	DNA excision repair protein ERCC-8	ERCC8	35188	29769	28363	26048	23679	33510	29528	34361	26040	23566	33397.6	31046.8	32995.3	25427	23196.1	1	0.845999	0.806042	0.740252	0.672928	0.94912	0.882312	0.937686	0.722604	0.659205	-0.0508805	0.0363129	0.131644	-0.0176479	-0.013723	0.0857055	NO
Q9ULP9	TBC1 domain family member 24	TBC1D24	235980	207630	211770	171580	163410	236760	200310	218180	183350	178270	235966	210613	209508	179034	175472	1	0.879863	0.897407	0.727096	0.692474	0.999941	0.892504	0.887822	0.758682	0.743588	-5.94351e-05	0.0126408	-0.00958452	0.0315868	0.0511142	0.0856978	NO
Q8IWZ8	SURP and G-patch domain-containing protein 1	SUGP1	209150	193490	179120	143790	142730	207150	191670	187740	152480	151420	206455	201529	180278	148891	149043	1	0.925126	0.856419	0.687497	0.682429	0.987116	0.96356	0.861956	0.711884	0.712615	-0.0128842	0.0384345	0.00553722	0.024387	0.0301858	0.0856604	NO
P57076	UPF0769 protein C21orf59	C21orf59	466040	423280	412160	323650	316560	492670	409990	413910	361070	314400	491018	431078	397459	352570	309465	1	0.908248	0.884388	0.694468	0.679255	1.0536	0.92498	0.852843	0.756524	0.664032	0.0535957	0.0167323	-0.031545	0.0620553	-0.0152234	0.0856148	NO
O60239	SH3 domain-binding protein 5	SH3BP5	56811	52034	53100	41768	39075	58758	49834	54780	45117	40661	58560.9	52397.2	52602.7	44054.9	40022.8	1	0.915914	0.934678	0.73521	0.687807	1.0308	0.922308	0.925925	0.775465	0.70449	0.0308029	0.00639347	-0.00875322	0.0402549	0.0166833	0.0853814	NO
Q9BSL1	Ubiquitin-associated domain-containing protein 1	UBAC1	882260	784230	788200	683570	607660	933280	771940	832060	675650	630580	930150	811645	798989	659745	620683	1	0.888888	0.893387	0.774794	0.688754	1.05428	0.919961	0.905616	0.74779	0.703514	0.0542811	0.0310734	0.0122289	-0.0270047	0.0147605	0.0853393	NO
Q9BXS6	Nucleolar and spindle-associated protein 1	NUSAP1	414510	377090	371590	303360	305990	414150	367830	379640	330890	325750	412761	386749	364551	323101	320637	1	0.909725	0.896456	0.731852	0.738197	0.995781	0.933028	0.879474	0.779476	0.773533	-0.0042193	0.0233032	-0.0169818	0.0476242	0.035336	0.0850622	NO
O00273	DNA fragmentation factor subunit alpha	DFFA	445550	413650	378200	299450	308230	452240	394650	386120	323260	336150	450723	414949	370773	315650	330874	1	0.928403	0.848839	0.672091	0.691797	1.01161	0.931318	0.83217	0.708451	0.742619	0.0116111	0.00291524	-0.0166686	0.0363602	0.0508223	0.0850403	NO
Q96DE0	U8 snoRNA-decapping enzyme	NUDT16	27047	25000	24774	24794	18992	31757	24426	26559	21926	18953	31650.5	25682.4	25503.4	21409.9	18655.5	1	0.924317	0.915961	0.916701	0.702185	1.1702	0.949545	0.942929	0.79158	0.689744	0.170204	0.0252285	0.0269675	-0.125121	-0.0124406	0.0848379	NO
Q53H82	Beta-lactamase-like protein 2	LACTB2	790770	673660	690660	512060	549590	766990	637280	705530	598880	596430	764418	670059	677488	584782	587069	1	0.851904	0.873402	0.647546	0.695006	0.966675	0.84735	0.856745	0.73951	0.742401	-0.0333248	-0.0045543	-0.0166571	0.0919636	0.0473951	0.0848225	NO
Q16775	Hydroxyacylglutathione hydrolase, mitochondrial	HAGH	182860	168020	160430	134350	129890	175280	164520	170340	139880	145490	174692	172982	163570	136587	143206	1	0.918845	0.877338	0.734715	0.710325	0.955333	0.945981	0.894508	0.746949	0.783148	-0.0446672	0.0271361	0.0171699	0.0122343	0.0728231	0.0846962	NO
Q99541	Perilipin-2	PLIN2	346880	298040	256410	176110	166790	361470	288750	262260	198590	166570	360258	303602	251836	193915	163956	1	0.859202	0.739189	0.507697	0.480829	1.03857	0.875236	0.726004	0.559026	0.472658	0.0385659	0.0160341	-0.0131854	0.0513293	-0.00817123	0.0845726	NO
Q15366	Poly(rC)-binding protein 2	PCBP2	396340	362020	350020	322240	274260	429530	359240	357350	316280	284990	428089	377718	343147	308835	280517	1	0.913408	0.883131	0.813039	0.691982	1.08011	0.953014	0.865789	0.779216	0.707768	0.0801067	0.0396063	-0.0173417	-0.0338229	0.0157866	0.084335	NO
P52209	6-phosphogluconate dehydrogenase, decarboxylating	PGD	1298100	1215700	1207900	1046300	1021700	1332900	1173300	1218200	1083600	1126900	1.32843e+06	1.23365e+06	1.16978e+06	1.05809e+06	1.10921e+06	1	0.936523	0.930514	0.806024	0.787073	1.02336	0.95035	0.901149	0.815108	0.854489	0.0233648	0.013827	-0.0293648	0.00908368	0.0674158	0.0843266	NO
Q9Y6K1	DNA (cytosine-5)-methyltransferase 3A	DNMT3A	33161	26595	22720	18976	17696	35841	26068	24167	18837	17483	35720.8	27408.8	23206.5	18393.6	17208.6	1	0.801996	0.685142	0.572238	0.533639	1.07719	0.826538	0.699812	0.554675	0.518941	0.0771931	0.0245412	0.0146697	-0.0175638	-0.0146982	0.084142	NO
Q9Y6H1	Coiled-coil-helix-coiled-coil-helix domain-containing protein 2;Putative coiled-coil-helix-coiled-coil-helix domain-containing protein CHCHD2P9, mitochondrial	CHCHD2;CHCHD2P9	151450	136950	134950	116200	110390	141500	137620	148330	118000	121190	141025	144699	142434	115222	119288	1	0.904259	0.891053	0.76725	0.728887	0.931168	0.955421	0.940472	0.760794	0.787638	-0.0688316	0.0511621	0.0494189	-0.00645611	0.058751	0.0840443	NO
Q5SW96	Low density lipoprotein receptor adapter protein 1	LDLRAP1	66634	56398	51447	41902	27667	72319	54051	55970	39732	28644	72076.5	56831.1	53745.4	38796.7	28194.4	1	0.846385	0.772083	0.628838	0.415208	1.08168	0.852885	0.806577	0.582236	0.423124	0.081677	0.00650001	0.0344932	-0.0466025	0.00791506	0.0839828	NO
O60927	Protein phosphatase 1 regulatory subunit 11	PPP1R11	92579	85614	88057	76699	73495	94582	87224	89827	75617	79396	94264.8	91710.4	86256.7	73836.9	78149.8	1	0.924767	0.951155	0.828471	0.793863	1.01821	0.990618	0.93171	0.797556	0.844142	0.0182093	0.0658506	-0.0194456	-0.0309148	0.0502795	0.083979	NO
Q14008	Cytoskeleton-associated protein 5	CKAP5	2505300	2313500	2313800	1628100	1473100	2565100	2242200	2362200	1835900	1492500	2.5565e+06	2.35753e+06	2.26831e+06	1.79268e+06	1.46907e+06	1	0.923442	0.923562	0.649862	0.587993	1.02044	0.941016	0.905405	0.715556	0.586387	0.0204356	0.0175739	-0.0181566	0.0656935	-0.00160694	0.0839395	NO
Q5T1C6	Acyl-coenzyme A thioesterase THEM4	THEM4	158270	148170	147180	155450	120260	173610	158940	156130	131490	126130	173028	167115	149924	128395	124150	1	0.936185	0.92993	0.982182	0.759841	1.09324	1.05589	0.94727	0.811238	0.784421	0.0932442	0.119701	0.0173405	-0.170944	0.0245801	0.0839218	NO
Q96A73	Putative monooxygenase p33MONOX	KIAA1191	35386	35381	33228	32445	30663	37805	35408	34967	31083	31733	37678.2	37229.2	33577.2	30351.3	31234.9	1	0.999859	0.939015	0.916888	0.866529	1.06478	1.05209	0.948884	0.85772	0.882692	0.0647774	0.0522301	0.00986848	-0.0591677	0.0161625	0.0838708	NO
O75554	WW domain-binding protein 4	WBP4	153500	149810	142490	137080	124240	155170	151060	155190	131970	130680	154650	158830	149022	128863	128629	1	0.975961	0.928274	0.893029	0.809381	1.00749	1.03472	0.970826	0.839501	0.837973	0.00748928	0.0587609	0.0425527	-0.0535286	0.0285921	0.0838663	NO
Q96QT4	Transient receptor potential cation channel subfamily M member 7	TRPM7	5502.2	4642.7	4600.6	4376.4	3881.7	5596.8	5093.2	4589.7	4413.2	3875.5	5578.03	5355.17	4407.28	4309.31	3814.67	1	0.84379	0.836138	0.795391	0.705481	1.01378	0.973278	0.801003	0.783198	0.693299	0.0137817	0.129488	-0.0351353	-0.0121931	-0.0121822	0.0837593	YES
P52701	DNA mismatch repair protein Msh6	MSH6	1790900	1460100	1026500	542940	427220	1754100	1376400	1225500	628210	418460	1.74822e+06	1.4472e+06	1.17679e+06	613422	411892	1	0.815288	0.573175	0.303166	0.23855	0.976167	0.808083	0.657095	0.342521	0.229992	-0.0238331	-0.00720568	0.0839195	0.0393554	-0.00855884	0.0836773	NO
P45985	Dual specificity mitogen-activated protein kinase kinase 4	MAP2K4	180990	161490	122130	100760	81392	172030	158630	139050	104220	89775	171453	166789	133523	101767	88365.9	1	0.892259	0.674789	0.556716	0.449704	0.947307	0.921538	0.737739	0.562278	0.488236	-0.0526932	0.0292787	0.0629501	0.00556169	0.0385321	0.0836294	YES
O94763	Unconventional prefoldin RPB5 interactor 1	URI1	192230	179900	166600	139930	126670	206750	166400	167420	151390	133900	206057	174959	160766	147826	131798	1	0.935858	0.86667	0.72793	0.65895	1.07193	0.910154	0.83632	0.769007	0.685628	0.0719275	-0.0257046	-0.0303504	0.0410769	0.0266782	0.0836276	NO
Q8WWM7	Ataxin-2-like protein	ATXN2L	1323400	1139000	1189800	933170	957630	1359500	1121800	1160000	1048700	996900	1.35494e+06	1.1795e+06	1.11389e+06	1.02401e+06	981253	1	0.860662	0.899048	0.705131	0.723613	1.02383	0.891265	0.841692	0.773774	0.741464	0.023833	0.030603	-0.0573562	0.0686437	0.0178502	0.0835737	NO
Q7Z4W1	L-xylulose reductase	DCXR	461000	428300	387370	315680	303100	474450	403230	390440	342720	332790	472859	423970	374922	334652	327567	1	0.929067	0.840282	0.684772	0.657484	1.02572	0.919675	0.813279	0.725927	0.710557	0.0257241	-0.00939219	-0.027003	0.0411545	0.0530729	0.0835563	NO
O00268	Transcription initiation factor TFIID subunit 4	TAF4	185010	169260	167200	147700	137230	197050	157170	167650	156850	148400	196389	165254	160987	153158	146071	1	0.914869	0.903735	0.798335	0.741744	1.06151	0.893217	0.870151	0.827835	0.789529	0.0615056	-0.0216525	-0.0335841	0.0294994	0.0477853	0.0835536	NO
Q9H6S3	Epidermal growth factor receptor kinase substrate 8-like protein 2	EPS8L2	24567	16100	12744	6542.6	4849.3	23871	15415	15445	7379.7	4895.5	23790.9	16207.9	14831.1	7205.98	4818.66	1	0.655351	0.518745	0.266317	0.197391	0.968411	0.659742	0.603701	0.293319	0.196144	-0.0315894	0.00439097	0.0849564	0.0270028	-0.00124714	0.0835137	NO
O60664	Perilipin-3	PLIN3	875590	755140	761550	595140	569720	867950	734800	793200	634060	621560	865039	772595	761674	619134	611804	1	0.862436	0.869756	0.679702	0.65067	0.98795	0.88237	0.869898	0.707105	0.698734	-0.01205	0.0199346	0.000141127	0.0274031	0.0480638	0.0834927	NO
Q8IYS1	Peptidase M20 domain-containing protein 2	PM20D2	163790	146680	142670	120900	106990	172800	140470	150530	121100	113770	172220	147695	144547	118249	111984	1	0.895537	0.871054	0.73814	0.653214	1.05147	0.901735	0.882515	0.721956	0.683707	0.0514713	0.00619755	0.0114601	-0.0161839	0.0304921	0.0834372	NO
P10636	Microtubule-associated protein tau	MAPT	320340	284340	293180	234510	242440	305920	278450	302910	260030	263210	304894	292772	290871	253909	259079	1	0.887619	0.915215	0.732066	0.756821	0.951783	0.913942	0.908006	0.792623	0.808762	-0.0482174	0.0263224	-0.00720929	0.0605568	0.0519408	0.0833933	NO
O43464	Serine protease HTRA2, mitochondrial	HTRA2	52323	49031	48612	41259	38248	53652	45824	49618	43501	42728	53472.1	48181	47645.9	42477	42057.4	1	0.937083	0.929075	0.788544	0.730998	1.02196	0.920837	0.910611	0.811822	0.803802	0.021961	-0.0162459	-0.0184644	0.0232778	0.0728046	0.0833331	NO
Q96AT9	Ribulose-phosphate 3-epimerase	RPE	175530	156720	160770	141180	136800	191060	155150	157910	147270	138800	190419	163130	151634	143803	136621	1	0.892839	0.915912	0.804307	0.779354	1.08482	0.929358	0.863862	0.819251	0.778337	0.0848245	0.0365189	-0.0520496	0.0149444	-0.00101729	0.0832209	NO
O43399	Tumor protein D54	TPD52L2	595310	537460	533040	425520	432520	569920	528640	547340	460260	482090	568009	555831	525585	449425	474523	1	0.902824	0.895399	0.714787	0.726546	0.954139	0.933683	0.882877	0.754943	0.797103	-0.0458607	0.030859	-0.0125221	0.040156	0.0705569	0.0831891	NO
Q96FK6	WD repeat-containing protein 89	WDR89	96391	94871	88891	71092	68911	97453	91036	92458	76696	72796	97126.2	95718.5	88783.2	74890.5	71653.4	1	0.984231	0.922192	0.737538	0.714911	1.00763	0.993023	0.921073	0.776945	0.743362	0.00762696	0.00879181	-0.00111862	0.0394076	0.0284509	0.0831587	NO
Q66K74	Microtubule-associated protein 1S;MAP1S heavy chain;MAP1S light chain	MAP1S	278000	238540	226800	166620	131440	300170	225660	237000	173640	133030	299163	237267	227580	169552	130942	1	0.858058	0.815827	0.599353	0.472806	1.07613	0.853478	0.818634	0.609901	0.471014	0.076127	-0.00457965	0.00280657	0.0105483	-0.00179137	0.0831109	NO
P07195	L-lactate dehydrogenase B chain	LDHB	2510300	2296200	2279700	1804900	1857300	2605700	2180000	2218600	2061000	1955500	2.59696e+06	2.29213e+06	2.13042e+06	2.01248e+06	1.92481e+06	1	0.914711	0.908138	0.718998	0.739872	1.03452	0.91309	0.848671	0.80169	0.766764	0.0345223	-0.00162186	-0.0594671	0.0826925	0.026892	0.0830179	NO
P21980	Protein-glutamine gamma-glutamyltransferase 2	TGM2	575300	497690	524990	392920	392100	571660	493210	514700	440530	424660	569743	518578	494243	430160	417995	1	0.865096	0.91255	0.682983	0.681557	0.99034	0.901405	0.859104	0.747714	0.726568	-0.00965963	0.0363086	-0.0534455	0.0647309	0.0450107	0.0829451	NO
P48735	Isocitrate dehydrogenase [NADP], mitochondrial	IDH2	779490	750130	683820	531980	511060	752670	734540	709060	569650	570500	750146	772321	680878	556240	561546	1	0.962334	0.877266	0.682472	0.655634	0.962355	0.990803	0.873491	0.713595	0.720401	-0.0376454	0.0284688	-0.00377454	0.0311231	0.0647675	0.0829395	NO
Q99618	Cell division cycle-associated protein 3	CDCA3	131400	115950	116710	94233	100670	129830	116170	115820	105850	105400	129395	122145	111217	103358	103746	1	0.88242	0.888204	0.717146	0.766134	0.984738	0.929568	0.846398	0.786592	0.789541	-0.0152619	0.0471478	-0.0418065	0.0694463	0.0234069	0.0829327	NO
Q15424	Scaffold attachment factor B1	SAFB	604390	483270	447890	354600	339470	632480	452440	462800	398270	345720	630359	475711	444406	388895	340294	1	0.7996	0.741061	0.586707	0.561674	1.04297	0.787093	0.735296	0.64345	0.563037	0.042967	-0.0125063	-0.00576514	0.0567424	0.00136282	0.0828008	NO
Q8TAP6	Centrosomal protein of 76 kDa	CEP76	48719	44594	36784	28963	24169	51151	43090	39814	29407	24404	50979.5	45306.3	38231.6	28714.7	24021	1	0.915331	0.755024	0.594491	0.49609	1.0464	0.929952	0.784736	0.589395	0.493051	0.0463978	0.0146214	0.0297124	-0.00509565	-0.00303861	0.0825973	NO
O00329	Phosphatidylinositol 4,5-bisphosphate 3-kinase catalytic subunit delta isoform	PIK3CD	303240	263490	227520	149200	93631	315120	252250	248100	158770	90980	314063	265225	238239	155032	89552	1	0.868916	0.750297	0.49202	0.308769	1.03569	0.874636	0.785645	0.511253	0.295317	0.0356918	0.00571995	0.0353484	0.0192339	-0.0134514	0.0825426	NO
Q15084	Protein disulfide-isomerase A6	PDIA6	802330	710020	748820	586880	564150	813250	693530	777550	632030	584000	810523	729202	746646	617152	574834	1	0.884948	0.933307	0.73147	0.70314	1.01021	0.908855	0.930597	0.769199	0.716455	0.010211	0.0239076	-0.00271012	0.0377297	0.0133158	0.0824541	NO
O15397	Importin-8	IPO8	527380	484570	472760	355610	305460	555460	461020	487690	389040	307410	553597	484733	468306	379882	302585	1	0.918825	0.896431	0.674296	0.579203	1.04971	0.919134	0.887987	0.720319	0.573751	0.0497121	0.000308384	-0.00844489	0.0460234	-0.00545152	0.0821474	NO
P62714	Serine/threonine-protein phosphatase 2A catalytic subunit beta isoform	PPP2CB	51183	43034	43610	34132	32013	52725	43292	46008	36902	30373	52548.2	45518.7	44179.4	36033.3	29896.3	1	0.840787	0.852041	0.666862	0.625462	1.02667	0.889333	0.863165	0.704009	0.584106	0.0266724	0.048546	0.0111242	0.0371473	-0.041356	0.0821339	NO
P45974	Ubiquitin carboxyl-terminal hydrolase 5	USP5	1075800	961970	896180	645570	544430	1087700	940700	939950	717620	544350	1.08405e+06	989085	902591	700727	535806	1	0.89419	0.833036	0.600084	0.50607	1.00767	0.919395	0.838995	0.651354	0.498054	0.00767072	0.0252045	0.00595916	0.0512706	-0.00801633	0.0820887	NO
Q8NFH5	Nucleoporin NUP53	NUP35	83657	77496	77948	72407	62089	88333	78223	83929	68440	63758	88036.8	82246.4	80593.2	66828.9	62757.3	1	0.926354	0.931757	0.865522	0.742185	1.05235	0.983138	0.963376	0.798844	0.750174	0.0523537	0.0567844	0.0316192	-0.0666784	0.00798824	0.0820672	NO
Q9GZT8	NIF3-like protein 1	NIF3L1	308950	291120	286450	223210	236530	295990	288460	279730	250950	263770	294997	303297	268612	245043	259630	1	0.942288	0.927173	0.722479	0.765593	0.954838	0.981702	0.869435	0.793146	0.840362	-0.0451616	0.0394141	-0.0577379	0.0706668	0.0747692	0.0819507	NO
Q9Y316	Protein MEMO1	MEMO1	178280	170090	152220	134430	130910	175800	164580	157060	138400	148600	175210	173045	150818	135142	146268	1	0.954061	0.853825	0.754039	0.734294	0.982782	0.970637	0.845959	0.758032	0.820438	-0.0172178	0.0165762	-0.00786677	0.0039937	0.0861432	0.0816286	NO
Q86WN1	F-BAR and double SH3 domains protein 1	FCHSD1	80678	75286	63584	56642	44817	91638	69554	67214	54767	45827	91330.7	73131.5	64542.5	53477.8	45107.7	1	0.933166	0.788121	0.702075	0.555505	1.13204	0.906462	0.800001	0.662854	0.559108	0.132039	-0.0267047	0.0118808	-0.0392206	0.00360337	0.0815983	NO
P07602	Prosaposin;Saposin-A;Saposin-B-Val;Saposin-B;Saposin-C;Saposin-D	PSAP	1298500	1168100	1207300	1009100	1049300	1348900	1160500	1183700	1095000	1084800	1.34438e+06	1.22019e+06	1.13665e+06	1.06922e+06	1.06777e+06	1	0.899576	0.929765	0.777127	0.808086	1.03533	0.939692	0.875358	0.823429	0.822313	0.0353301	0.0401159	-0.0544068	0.046302	0.0142266	0.0815679	NO
Q8NFF5	FAD synthase;Molybdenum cofactor biosynthesis protein-like region;FAD synthase region	FLAD1	280770	245350	242370	200210	173700	305650	234480	242100	203550	185800	304625	246541	232478	198758	182884	1	0.873847	0.863233	0.713075	0.618656	1.08496	0.878087	0.828	0.707904	0.651365	0.0849626	0.00424018	-0.0352334	-0.0051703	0.0327091	0.0815082	NO
Q03154	Aminoacylase-1	ACY1	716920	668860	660230	557250	593160	757660	654670	640390	607420	612880	755119	688343	614937	593121	603260	1	0.932963	0.920926	0.777283	0.827373	1.05328	0.960139	0.857749	0.827318	0.841461	0.0532821	0.0271761	-0.063177	0.0500349	0.0140886	0.0814047	NO
Q9Y676	28S ribosomal protein S18b, mitochondrial	MRPS18B	138830	107620	82621	54578	52844	145670	93691	88339	64787	56887	145181	98510	84827.9	63261.9	55994.1	1	0.775193	0.595124	0.393128	0.380638	1.04575	0.709573	0.61102	0.455679	0.403329	0.0457499	-0.0656197	0.0158963	0.0625505	0.0226905	0.0812675	NO
P19404	NADH dehydrogenase [ubiquinone] flavoprotein 2, mitochondrial	NDUFV2	124110	110160	109420	89045	84955	126880	103850	113750	92025	94516	126454	109192	109229	89858.7	93032.5	1	0.8876	0.881637	0.717468	0.684514	1.01889	0.879796	0.880098	0.724025	0.749597	0.0188903	-0.00780323	-0.00153971	0.00655617	0.0650834	0.081187	NO
Q15843	NEDD8	NEDD8	427450	385340	386910	332250	316370	469480	361410	388290	345120	330390	467905	379999	372857	336996	325204	1	0.901486	0.905158	0.777284	0.740133	1.09464	0.888991	0.872282	0.788386	0.760801	0.0946438	-0.0124946	-0.0328762	0.0111024	0.0206674	0.0810428	NO
Q9P2M4	TBC1 domain family member 14	TBC1D14	66315	57501	57024	49464	44097	69340	56952	60060	50700	44299	69107.5	59881.3	57672.9	49506.5	43603.7	1	0.867089	0.859896	0.745895	0.664963	1.04211	0.902983	0.869681	0.746535	0.657524	0.0421089	0.0358944	0.00978455	0.000640841	-0.00743881	0.0809899	NO
O60551	Glycylpeptide N-tetradecanoyltransferase 2	NMT2	356950	309350	327760	266070	254790	375540	292010	327150	304740	254790	374281	307030	314147	297566	250791	1	0.866648	0.918224	0.745399	0.713797	1.04855	0.860147	0.880087	0.833636	0.702594	0.0485517	-0.00650069	-0.0381366	0.0882372	-0.0112036	0.0809481	NO
Q92542	Nicastrin	NCSTN	9182	9461.2	8224.3	8810.5	6475.7	11509	9337	7856.1	7788.4	6562	11470.4	9817.25	7543.85	7605.06	6459	1	1.03041	0.895698	0.95954	0.70526	1.24923	1.06918	0.821591	0.828257	0.703442	0.249227	0.038777	-0.0741067	-0.131283	-0.00181826	0.0807957	NO
Q9GZU8	Protein FAM192A	FAM192A	656580	557210	571500	474520	443040	664210	529370	611310	497540	471870	661982	556598	587013	485828	464464	1	0.848655	0.870419	0.722715	0.674769	1.00823	0.847723	0.894046	0.739937	0.707398	0.00822814	-0.000931754	0.0236269	0.0172221	0.0326292	0.0807745	NO
Q86UE4	Protein LYRIC	MTDH	612820	543200	576810	458690	455180	599730	529630	598170	497250	489300	597719	556872	574395	485544	481620	1	0.886394	0.941239	0.748491	0.742763	0.975358	0.908703	0.937298	0.792312	0.785908	-0.0246423	0.0223093	-0.00394046	0.0438212	0.0431449	0.0806926	NO
P49023	Paxillin	PXN	265760	248320	226380	90103	53891	276710	239270	213680	122660	54354	275782	251577	205187	119773	53500.9	1	0.934377	0.851821	0.339039	0.202781	1.03771	0.946632	0.772077	0.450679	0.201313	0.0377107	0.012255	-0.0797445	0.11164	-0.00146796	0.0803935	NO
Q9UIC8	Leucine carboxyl methyltransferase 1	LCMT1	366390	330690	328450	269170	259000	362500	321470	341760	289050	277800	361284	338005	328176	282246	273440	1	0.902563	0.896449	0.734654	0.706897	0.986065	0.922528	0.895703	0.770342	0.746308	-0.0139352	0.0199647	-0.000746613	0.0356877	0.0394108	0.0803814	NO
Q14566	DNA replication licensing factor MCM6	MCM6	2240200	1964600	1566900	736210	496590	2255100	1843100	1722500	870380	503070	2.24754e+06	1.9379e+06	1.65404e+06	849891	495174	1	0.876975	0.699446	0.328636	0.221672	1.00328	0.865057	0.738344	0.379382	0.22104	0.00327517	-0.0119185	0.0388973	0.0507458	-0.000632106	0.0803677	NO
P07225	Vitamin K-dependent protein S	PROS1	234150	212100	214050	166210	161730	244380	210130	212660	177770	167390	243560	220938	204208	173585	164763	1	0.90583	0.914158	0.709844	0.690711	1.04019	0.943575	0.872123	0.741342	0.703663	0.0401897	0.0377453	-0.0420344	0.0314978	0.0129519	0.0803503	NO
Q9BTK6	PAXIP1-associated glutamate-rich protein 1	PAGR1	20140	18430	19825	16393	15620	19688	19053	20007	17418	16408	19622	20033	19211.8	17008	16150.5	1	0.915094	0.984359	0.813952	0.775571	0.974279	0.994687	0.953913	0.844487	0.80191	-0.0257213	0.0795926	-0.0304467	0.0305348	0.0263389	0.0802983	NO
Q6P1X6	UPF0598 protein C8orf82	C8orf82	23979	23248	20670	19387	18332	23773	21896	23625	20652	18260	23693.3	23022.2	22686	20165.8	17973.4	1	0.969515	0.862004	0.808499	0.764502	0.988084	0.960099	0.946078	0.840979	0.749547	-0.0119158	-0.00941556	0.0840737	0.0324802	-0.0149549	0.0802677	NO
Q9H3Q1	Cdc42 effector protein 4	CDC42EP4	98831	96888	89472	80688	71080	98846	95807	100570	79100	72973	98514.5	100735	96572.8	77237.9	71827.6	1	0.98034	0.905303	0.816424	0.719208	0.996798	1.01926	0.97715	0.781515	0.726772	-0.00320245	0.0389235	0.0718475	-0.0349086	0.0075648	0.0802247	NO
Q7Z6I8	UPF0461 protein C5orf24	C5orf24	23870	22254	22541	20348	17103	25573	22194	23898	18329	18653	25487.2	23335.6	22948.2	17897.5	18360.2	1	0.9323	0.944323	0.852451	0.716506	1.06775	0.97761	0.961381	0.749792	0.769176	0.0677518	0.0453101	0.0170571	-0.102659	0.0526698	0.0801296	NO
P43490	Nicotinamide phosphoribosyltransferase	NAMPT	1494900	1263500	781040	333440	242200	1469300	1130900	1025500	376260	232910	1.46437e+06	1.18907e+06	984741	367403	229254	1	0.845207	0.52247	0.223052	0.162018	0.979579	0.795416	0.658733	0.245771	0.153358	-0.0204212	-0.0497906	0.136264	0.022719	-0.0086599	0.080111	NO
Q9BWU0	Kanadaptin	SLC4A1AP	713330	615860	596790	397500	290570	748070	584310	631450	427200	292200	745561	614364	606352	417144	287614	1	0.863359	0.836625	0.557246	0.407343	1.04518	0.861262	0.850031	0.584783	0.403199	0.0451841	-0.0020971	0.0134054	0.0275378	-0.00414435	0.0798858	NO
O15144	Actin-related protein 2/3 complex subunit 2	ARPC2	970870	910860	902620	715330	764670	984380	892270	887090	792010	810180	981079	938164	851832	773366	797464	1	0.938189	0.929702	0.736793	0.787613	1.01051	0.966313	0.87739	0.79657	0.821391	0.010515	0.0281233	-0.052312	0.059777	0.0337776	0.0798808	NO
P55199	RNA polymerase II elongation factor ELL	ELL	209770	197810	191360	163190	148670	214220	192070	197640	165880	162890	213502	201949	189785	161975	160333	1	0.942985	0.912237	0.777947	0.708729	1.01779	0.962717	0.904727	0.772156	0.764329	0.0177889	0.0197319	-0.00751001	-0.00579156	0.0556005	0.0798197	NO
Q96KP4	Cytosolic non-specific dipeptidase	CNDP2	1176700	1051500	1075000	877470	929630	1240600	1011500	1050300	974980	958690	1.23644e+06	1.06353e+06	1.00855e+06	952028	943643	1	0.893601	0.913572	0.745704	0.790031	1.05077	0.903821	0.857105	0.809066	0.80194	0.0507686	0.0102207	-0.0564673	0.0633624	0.0119085	0.0797927	NO
Q96AG4	Leucine-rich repeat-containing protein 59	LRRC59	368620	336800	319550	271050	247980	386070	317900	330150	278840	269160	384775	334251	317028	272276	264935	1	0.913678	0.866882	0.73531	0.672725	1.04383	0.906764	0.86004	0.738636	0.718722	0.0438262	-0.00691434	-0.00684201	0.00332584	0.0459968	0.0793925	NO
Q02880	DNA topoisomerase 2-beta	TOP2B	104990	90162	86763	70385	60097	105580	87615	94855	72849	62134	105226	92121.5	91084.9	71134.1	61158.8	1	0.858768	0.826393	0.670397	0.572407	1.00225	0.877431	0.867558	0.677532	0.58252	0.00224702	0.0186636	0.0411649	0.00713496	0.010113	0.0793235	NO
Q9Y2R9	28S ribosomal protein S7, mitochondrial	MRPS7	155630	108680	84367	52114	47325	165330	93903	89436	63106	50237	164776	98732.9	85881.3	61620.5	49448.5	1	0.698323	0.5421	0.334858	0.304087	1.05876	0.634408	0.55183	0.395942	0.317731	0.0587646	-0.063915	0.00973005	0.0610837	0.0136445	0.0793079	NO
P20290	Transcription factor BTF3	BTF3	609230	544660	567960	436030	442810	619160	523930	569490	473800	479060	617084	550878	546855	462647	471541	1	0.894014	0.932259	0.715707	0.726836	1.01289	0.904221	0.897617	0.759395	0.773995	0.0128909	0.010207	-0.0346419	0.0436888	0.0471592	0.079304	NO
Q8N5U6	RING finger protein 10	RNF10	52741	46813	42890	36459	37037	55446	46370	44042	38235	37059	55260	48755	42291.5	37334.9	36477.3	1	0.887602	0.813219	0.691284	0.702243	1.04776	0.924424	0.801872	0.707892	0.691631	0.0477627	0.0368224	-0.0113477	0.0166081	-0.0106116	0.0792338	NO
Q9NVM4	Protein arginine N-methyltransferase 7	PRMT7	180490	159140	136470	96985	71550	187790	156870	143980	98771	73276	187160	164939	138257	96445.9	72125.9	1	0.881711	0.756108	0.537343	0.396421	1.03696	0.913838	0.766011	0.534356	0.399612	0.0369561	0.0321272	0.00990298	-0.00298697	0.00319065	0.0791899	NO
Q9NWM8	Peptidyl-prolyl cis-trans isomerase FKBP14	FKBP14	75574	66246	59382	47126	37648	84179	57714	61380	50261	39988	83896.7	60682.5	58940.4	49077.8	39360.4	1	0.876571	0.785746	0.623574	0.498161	1.11013	0.802955	0.779903	0.649401	0.520819	0.110126	-0.0736162	-0.00584331	0.0258268	0.0226581	0.0791516	NO
P48681	Nestin	NES	112780	102850	101520	79171	68985	115850	99016	108220	79450	74330	115461	104109	103919	77579.7	73163.3	1	0.911952	0.90016	0.701995	0.611678	1.02378	0.923115	0.921428	0.687885	0.648726	0.0237761	0.0111625	0.0212689	-0.0141097	0.0370486	0.0791463	NO
Q96EY8	Cob(I)yrinic acid a,c-diamide adenosyltransferase, mitochondrial	MMAB	188850	174630	164900	119610	108460	195450	162700	174480	129060	113750	194795	171068	167545	126022	111965	1	0.924702	0.87318	0.63336	0.574318	1.03148	0.905843	0.887186	0.667312	0.592876	0.0314775	-0.0188589	0.0140066	0.0339522	0.0185577	0.0791349	NO
P30048	Thioredoxin-dependent peroxide reductase, mitochondrial	PRDX3	397990	324460	333690	229350	250400	396260	310870	326290	291160	251890	394931	326860	313321	284306	247936	1	0.815247	0.838438	0.576271	0.629162	0.992314	0.821276	0.787259	0.714355	0.622971	-0.00768598	0.00602942	-0.0511789	0.138084	-0.00619009	0.0790582	NO
Q9C0B1	Alpha-ketoglutarate-dependent dioxygenase FTO	FTO	592570	525800	537010	423990	427390	589970	513920	536930	467340	460300	587991	540354	515589	456339	453075	1	0.887321	0.906239	0.71551	0.721248	0.992273	0.911881	0.87009	0.770101	0.764594	-0.00772667	0.0245601	-0.0361489	0.0545903	0.0433455	0.0786204	NO
Q12840	Kinesin heavy chain isoform 5A	KIF5A	89491	80881	76725	59040	46404	93174	81057	80117	62139	44574	92861.5	85226.2	76932.7	60676.2	43874.4	1	0.903789	0.857349	0.659731	0.518533	1.03766	0.952344	0.859669	0.678015	0.490266	0.0376632	0.0485544	0.00232067	0.0182836	-0.0282668	0.0785551	NO
Q9BPX5	Actin-related protein 2/3 complex subunit 5-like protein	ARPC5L	335490	313810	289490	209140	196610	312850	306470	302480	228770	226570	311801	322233	290458	223385	223014	1	0.935378	0.862887	0.623387	0.586038	0.929389	0.960486	0.865771	0.665846	0.664741	-0.0706108	0.0251076	0.00288434	0.0424592	0.0787023	0.0785426	NO
Q9C0B5	Palmitoyltransferase ZDHHC5	ZDHHC5	85391	71887	72176	57767	58055	79802	71837	74747	65732	61919	79534.4	75531.9	71776.1	64184.6	60947.1	1	0.841857	0.845241	0.6765	0.679873	0.931414	0.884542	0.840558	0.751656	0.713742	-0.0685861	0.0426854	-0.00468299	0.0751559	0.0338693	0.0784416	NO
P12755	Ski oncogene	SKI	52687	50324	46094	37857	34872	55860	48715	46799	39069	36556	55672.7	51220.7	44938.9	38149.3	35982.2	1	0.95515	0.874865	0.718526	0.661871	1.05667	0.972169	0.852942	0.724074	0.682943	0.0566679	0.0170187	-0.0219232	0.0055478	0.0210721	0.0783833	NO
O43924	Retinal rod rhodopsin-sensitive cGMP 3,5-cyclic phosphodiesterase subunit delta	PDE6D	46147	39531	39792	33043	30284	49982	38888	40766	33188	30639	49814.4	40888.2	39145.7	32406.7	30158.1	1	0.856632	0.862288	0.716038	0.656251	1.07947	0.886043	0.848283	0.70225	0.653522	0.0794716	0.0294106	-0.0140048	-0.0137877	-0.00272826	0.0783614	NO
Q86U38	Nucleolar protein 9	NOP9	8078.8	5815.1	4225.6	1930.1	926.8	8692.8	5014.6	4871.9	1924.9	1133.2	8663.65	5272.53	4678.26	1879.59	1115.41	1	0.719797	0.523048	0.238909	0.11472	1.07239	0.652637	0.579079	0.232657	0.138067	0.0723928	-0.0671601	0.0560309	-0.00625255	0.0233467	0.0783577	NO
P49748	Very long-chain specific acyl-CoA dehydrogenase, mitochondrial	ACADVL	788210	728300	713870	573410	549710	762980	695990	741020	623620	612150	760421	731788	711568	608940	602542	1	0.923992	0.905685	0.727484	0.697416	0.964744	0.928418	0.902764	0.77256	0.764443	-0.0352556	0.00442567	-0.00292116	0.0450764	0.0670277	0.078353	NO
Q96EV8	Dysbindin	DTNBP1	146580	135220	122560	84296	59942	153100	128380	134460	89216	57160	152587	134983	129116	87115.8	56262.8	1	0.9225	0.83613	0.575085	0.408937	1.04098	0.920884	0.880855	0.594323	0.383837	0.0409779	-0.00161519	0.0447249	0.0192374	-0.0251001	0.0782249	NO
Q96DB5	Regulator of microtubule dynamics protein 1	RMDN1	399290	361420	357980	274790	276720	390190	354390	359490	301450	305090	388881	372618	345202	294354	300301	1	0.905157	0.896541	0.688197	0.69303	0.973932	0.933202	0.864539	0.737193	0.752088	-0.0260677	0.028045	-0.0320024	0.0489963	0.0590583	0.0780295	NO
Q5FBB7	Shugoshin-like 1	SGOL1	35403	31671	31161	25618	21586	35548	30772	32531	26767	23409	35428.8	32354.8	31238	26136.9	23041.6	1	0.894585	0.88018	0.723611	0.609722	1.00073	0.913899	0.882355	0.738268	0.650837	0.000728248	0.0193137	0.00217571	0.0146567	0.0411146	0.0779889	NO
P49790	Nuclear pore complex protein Nup153	NUP153	1433500	1293200	1249900	940050	958320	1436000	1241000	1242800	1073500	1025200	1.43118e+06	1.30483e+06	1.1934e+06	1.04823e+06	1.00911e+06	1	0.902128	0.871922	0.655773	0.668518	0.998384	0.910241	0.832511	0.731238	0.703948	-0.00161558	0.00811373	-0.0394114	0.0754651	0.0354299	0.0779818	NO
Q9NXA8	NAD-dependent protein deacylase sirtuin-5, mitochondrial	SIRT5	163280	144860	127560	86426	68489	167490	134510	134370	96769	72599	166928	141429	129029	94491	71459.5	1	0.887188	0.781235	0.529312	0.419457	1.02234	0.866172	0.790234	0.578705	0.43765	0.0223437	-0.0210158	0.00899894	0.0493937	0.0181927	0.0779134	NO
P49407	Beta-arrestin-1	ARRB1	341640	322500	336290	268550	284770	328950	331960	332780	294770	300820	327847	349034	319553	287831	296098	1	0.943976	0.98434	0.786061	0.833538	0.959626	1.02164	0.935351	0.842498	0.866697	-0.0403735	0.0776678	-0.0489891	0.0564365	0.0331589	0.0779006	NO
Q14019	Coactosin-like protein	COTL1	356890	313900	328480	249660	266480	337640	317680	324240	292220	280380	336508	334020	311353	285341	275979	1	0.879543	0.920396	0.699543	0.746673	0.942889	0.935918	0.872405	0.799521	0.773289	-0.057111	0.0563757	-0.0479901	0.0999776	0.0266167	0.0778688	NO
Q99633	Pre-mRNA-splicing factor 18	PRPF18	78382	74455	75777	54988	45474	85393	71860	73818	56355	49378	85106.6	75556.1	70884	55028.4	48603	1	0.949899	0.966765	0.701539	0.580159	1.08579	0.963947	0.904341	0.702054	0.620078	0.0857929	0.0140483	-0.0624246	0.000515117	0.0399196	0.0778513	NO
O00584	Ribonuclease T2	RNASET2	221090	193840	200890	155250	160830	209390	185010	202160	183480	175350	208688	194526	194125	179161	172598	1	0.876747	0.908634	0.702203	0.727441	0.943904	0.87985	0.878036	0.810352	0.780667	-0.0560959	0.00310289	-0.0305985	0.10815	0.0532261	0.0777842	NO
O43707	Alpha-actinin-4	ACTN4	4771000	4235500	4320700	3492000	3544500	4844300	4067000	4422600	3737300	3793800	4.82805e+06	4.27619e+06	4.24682e+06	3.64932e+06	3.73425e+06	1	0.887759	0.905617	0.731922	0.742926	1.01196	0.896287	0.890132	0.764897	0.782698	0.0119584	0.00852794	-0.0154852	0.0329747	0.0397723	0.0777481	NO
Q1ED39	Lysine-rich nucleolar protein 1	KNOP1	19218	15286	14284	11761	10656	19409	13626	14998	12973	12149	19343.9	14326.9	14401.9	12667.6	11958.3	1	0.7954	0.743262	0.611978	0.55448	1.00655	0.745491	0.749396	0.659153	0.622245	0.00655155	-0.0499087	0.00613442	0.047175	0.0677653	0.0777176	NO
Q9H488	GDP-fucose protein O-fucosyltransferase 1	POFUT1	139710	129150	126000	108940	111450	144170	122550	125790	115420	121980	143686	128853	120790	112703	120065	1	0.924415	0.901868	0.779758	0.797724	1.02846	0.922292	0.864579	0.806692	0.85939	0.0284625	-0.00212312	-0.0372889	0.0269341	0.0616666	0.0776511	NO
P60174	Triosephosphate isomerase	TPI1	2523200	2395700	2336400	1865200	1960000	2439400	2386100	2336400	2002500	2171500	2.43122e+06	2.50883e+06	2.24354e+06	1.95536e+06	2.13742e+06	1	0.949469	0.925967	0.73922	0.776791	0.963546	0.994305	0.889164	0.774953	0.847106	-0.0364541	0.0448357	-0.0368034	0.0357325	0.0703142	0.0776249	NO
O43852	Calumenin	CALU	1021900	783540	574940	319840	269260	1084600	695590	639920	369100	265740	1.08096e+06	731368	614486	360411	261569	1	0.766748	0.562619	0.312986	0.26349	1.0578	0.715694	0.601317	0.352687	0.255963	0.0577968	-0.0510541	0.0386983	0.0397017	-0.00752616	0.0776166	NO
Q13257	Mitotic spindle assembly checkpoint protein MAD2A	MAD2L1	394730	339540	326930	258300	241180	384180	332060	338810	281960	262740	382892	349140	325344	275323	258616	1	0.860183	0.828237	0.654371	0.611	0.970009	0.884502	0.824218	0.697496	0.655172	-0.0299912	0.0243193	-0.0040187	0.0431245	0.0441722	0.0776061	NO
Q9BRP8	Partner of Y14 and mago	WIBG	228680	192540	201540	162290	158570	242640	185270	205000	176220	158260	241826	194799	196852	172072	155776	1	0.841963	0.881319	0.709682	0.693414	1.05749	0.851843	0.860819	0.752456	0.681196	0.0574876	0.00988014	-0.0204998	0.0427746	-0.012218	0.0774245	NO
Q709C8	Vacuolar protein sorting-associated protein 13C	VPS13C	581340	546830	513440	390920	330380	608320	520070	531220	416460	343440	606280	546820	510106	406656	338049	1	0.940637	0.883201	0.672446	0.568308	1.0429	0.94062	0.877466	0.699515	0.5815	0.0429007	-1.7405e-05	-0.00573469	0.0270691	0.0131927	0.0774104	NO
Q96SY0	von Willebrand factor A domain-containing protein 9	VWA9	81544	68059	63401	47951	46281	86229	62754	66550	50816	48869	85939.8	65981.8	63904.9	49619.8	48102	1	0.834629	0.777507	0.588038	0.567559	1.05391	0.809155	0.783686	0.608503	0.58989	0.0539072	-0.0254738	0.00617963	0.0204646	0.0223311	0.0774087	NO
Q99536	Synaptic vesicle membrane protein VAT-1 homolog	VAT1	716920	612230	569190	444820	432720	736960	580610	569910	491190	466770	734488	610474	547258	479627	459444	1	0.853973	0.793938	0.62046	0.603582	1.02451	0.851523	0.763347	0.669011	0.640858	0.0245054	-0.00244969	-0.0305914	0.048551	0.0372757	0.077291	NO
Q14409	Putative glycerol kinase 3;Glycerol kinase	GK3P;GK	22723	19684	20041	17966	15822	25475	18712	20304	18228	15880	25389.6	19674.5	19497	17798.9	15630.8	1	0.866259	0.88197	0.790653	0.696299	1.11735	0.865839	0.858029	0.783299	0.687882	0.117351	-0.000420075	-0.0239405	-0.00735361	-0.00841649	0.0772202	NO
Q53ET0	CREB-regulated transcription coactivator 2	CRTC2	41634	37271	35673	32542	31242	45858	34704	38700	32460	31011	45704.2	36489	37161.8	31695.9	30524.3	1	0.895206	0.856824	0.781621	0.750396	1.09776	0.876423	0.892584	0.761298	0.733157	0.0977616	-0.0187826	0.0357601	-0.0203229	-0.0172393	0.0771769	NO
Q96BT7	Alkylated DNA repair protein alkB homolog 8	ALKBH8	48656	40462	34207	21033	15915	49062	40295	36181	22065	16729	48897.5	42367.6	34743	21545.6	16466.4	1	0.831593	0.703038	0.43228	0.327092	1.00496	0.870758	0.714053	0.442814	0.338425	0.0049626	0.0391643	0.0110152	0.0105348	0.0113332	0.07701	NO
O43805	Sjoegren syndrome nuclear autoantigen 1	SSNA1	73513	69927	70308	64298	60461	77200	68996	73467	66095	60536	76941.1	72544.8	70547	64539.1	59585.8	1	0.95122	0.956402	0.874648	0.822453	1.04663	0.98683	0.959653	0.877928	0.810548	0.0466325	0.0356103	0.00325098	0.00327958	-0.0119048	0.0768686	NO
Q9BVK6	Transmembrane emp24 domain-containing protein 9	TMED9	56476	41235	29056	15612	12753	59466	38482	31521	15674	14390	59266.6	40461.3	30268.2	15305	14164.1	1	0.730133	0.514484	0.276436	0.225813	1.04941	0.716434	0.535947	0.271001	0.250799	0.0494116	-0.0136991	0.0214635	-0.00543547	0.0249865	0.0767269	NO
O60547	GDP-mannose 4,6 dehydratase	GMDS	591740	553090	537050	434450	448160	587110	529820	544000	487370	476750	585141	557071	522378	475897	469267	1	0.934684	0.907578	0.734191	0.75736	0.988848	0.941412	0.882783	0.804233	0.793029	-0.0111519	0.00672825	-0.0247943	0.0700427	0.0356695	0.0764943	NO
P40855	Peroxisomal biogenesis factor 19	PEX19	462060	412180	384370	307840	265960	510010	397880	390970	325020	252250	508300	418345	375431	317369	248291	1	0.892049	0.831862	0.666234	0.575596	1.10007	0.905391	0.812515	0.686856	0.537356	0.100073	0.0133425	-0.0193469	0.0206226	-0.0382402	0.0764506	NO
Q15286	Ras-related protein Rab-35	RAB35	242220	214680	196830	153940	144800	243470	202880	202700	168890	157930	242653	213315	194644	164914	155451	1	0.886302	0.812608	0.635538	0.597804	1.00179	0.880667	0.803581	0.680845	0.641777	0.00178958	-0.00563469	-0.00902687	0.0453069	0.0439731	0.0764081	NO
Q15390	Mitochondrial fission regulator 1	MTFR1	10878	9689.4	9816.9	7502.4	7493.8	10449	8883.8	10371	8461.3	8367.1	10414	9340.74	9958.8	8262.12	8235.77	1	0.890734	0.902454	0.689686	0.688895	0.957341	0.858682	0.915499	0.759525	0.757104	-0.0426588	-0.0320519	0.0130443	0.0698398	0.0682085	0.0763818	NO
P00387	NADH-cytochrome b5 reductase 3;NADH-cytochrome b5 reductase 3 membrane-bound form;NADH-cytochrome b5 reductase 3 soluble form	CYB5R3	11177	10292	8950.5	8277.4	6749.3	12216	10385	9406.4	7407.9	7050.3	12175	10919.2	9032.53	7233.51	6939.64	1	0.92082	0.800796	0.740574	0.603856	1.08929	0.976931	0.808136	0.647179	0.620886	0.0892933	0.0561111	0.00733957	-0.0933959	0.0170297	0.0763778	NO
P39687	Acidic leucine-rich nuclear phosphoprotein 32 family member A	ANP32A	714700	618090	642530	495500	467230	741680	580000	671950	536140	482420	739193	609832	645243	523519	474848	1	0.864824	0.899021	0.693298	0.653743	1.03427	0.85327	0.902816	0.732502	0.664402	0.0342698	-0.011554	0.00379566	0.0392039	0.0106591	0.0763745	NO
Q14157	Ubiquitin-associated protein 2-like	UBAP2L	1024700	901890	927950	708490	734210	995380	890490	939260	785220	790710	992042	936292	901928	766736	778299	1	0.88015	0.905582	0.691412	0.716512	0.968129	0.913724	0.880188	0.748254	0.759539	-0.031871	0.0335732	-0.0253945	0.0568416	0.0430265	0.0761758	NO
Q6P4R8	Nuclear factor related to kappa-B-binding protein	NFRKB	68852	65297	62745	51147	49597	67249	62283	65809	54308	55013	67023.5	65486.5	63193.4	53029.6	54149.5	1	0.948368	0.911303	0.742854	0.720342	0.973443	0.95112	0.917814	0.770196	0.786463	-0.0265575	0.0027528	0.00651199	0.0273422	0.0661205	0.07617	NO
Q96RM1	Small proline-rich protein 2F	SPRR2F	17389	15850	15915	16666	14180	19315	15717	16867	15269	14673	19250.2	16525.4	16196.6	14909.6	14442.7	1	0.911496	0.915234	0.958422	0.815458	1.10703	0.950337	0.931428	0.857413	0.830565	0.107035	0.038841	0.0161945	-0.101009	0.0151071	0.0761684	NO
O75792	Ribonuclease H2 subunit A	RNASEH2A	431250	392760	385200	282860	273650	427870	365660	393640	319280	302650	426435	384468	377994	311764	297900	1	0.910748	0.893217	0.655907	0.634551	0.988835	0.891519	0.876509	0.722931	0.690782	-0.0111651	-0.0192283	-0.0167086	0.0670238	0.0562312	0.0761529	NO
Q9NZD2	Glycolipid transfer protein	GLTP	372070	334020	333650	269730	272460	363530	325660	344580	299520	286630	362311	342410	330884	292469	282131	1	0.897734	0.89674	0.724944	0.732282	0.973771	0.920285	0.889307	0.786059	0.758274	-0.0262294	0.0225505	-0.0074331	0.0611153	0.0259928	0.0759961	NO
O75410	Transforming acidic coiled-coil-containing protein 1	TACC1	371290	349610	313090	230690	183390	373470	348320	334770	252420	172600	372217	366236	321464	246478	169891	1	0.941609	0.843249	0.62132	0.493927	1.0025	0.986388	0.865804	0.663842	0.457569	0.00249802	0.0447787	0.0225545	0.0425218	-0.0363572	0.0759958	NO
P12268	Inosine-5-monophosphate dehydrogenase 2	IMPDH2	1441900	586160	313500	217230	196180	1592800	513020	353560	219170	187080	1.58746e+06	539407	339507	214011	184144	1	0.406519	0.217421	0.150655	0.136057	1.10095	0.374095	0.235458	0.148423	0.127709	0.100949	-0.0324244	0.0180369	-0.00223273	-0.00834757	0.0759811	NO
Q9NP81	Serine--tRNA ligase, mitochondrial	SARS2	249410	208410	201670	165330	118810	283070	196200	217700	167360	103300	282121	206292	209047	163420	101679	1	0.835612	0.808588	0.662884	0.476364	1.13115	0.827118	0.838167	0.655227	0.407677	0.131152	-0.00849373	0.0295791	-0.00765701	-0.0686876	0.075893	NO
P14649	Myosin light chain 6B	MYL6B	217660	186290	165690	119520	100930	210950	178280	190500	123810	106740	210243	187450	182928	120895	105065	1	0.855876	0.761233	0.549113	0.463705	0.965922	0.861205	0.840432	0.555433	0.482701	-0.0340782	0.00532877	0.0791988	0.00631927	0.0189959	0.0757645	NO
Q16531	DNA damage-binding protein 1	DDB1	1994900	1811300	1763600	1397700	1501700	2095700	1738900	1690900	1563500	1577700	2.08867e+06	1.82834e+06	1.62369e+06	1.52669e+06	1.55294e+06	1	0.907965	0.884054	0.700637	0.75277	1.04701	0.916507	0.813922	0.765299	0.778453	0.0470057	0.00854208	-0.070132	0.0646621	0.0256839	0.0757618	NO
Q96I15	Selenocysteine lyase	SCLY	173390	160540	158580	144640	135930	181540	161180	162620	141720	143500	180931	169470	156157	138384	141248	1	0.92589	0.914586	0.834189	0.783955	1.04349	0.977394	0.900609	0.798107	0.814624	0.0434925	0.0515042	-0.013977	-0.0360814	0.0306688	0.0756071	NO
Q9H0D6	5-3 exoribonuclease 2	XRN2	1189300	1061700	1053100	815580	817480	1165800	1003900	1106600	897380	884630	1.16189e+06	1.05554e+06	1.06262e+06	876255	870745	1	0.89271	0.885479	0.685765	0.687362	0.976953	0.887527	0.893481	0.736782	0.732149	-0.023047	-0.00518309	0.00800236	0.0510176	0.0447869	0.0755768	NO
Q86TN4	tRNA 2-phosphotransferase 1	TRPT1	55077	49685	46378	32926	28288	57331	47333	46747	35085	30945	57138.7	49767.6	44889	34259.1	30459.3	1	0.902101	0.842057	0.597818	0.513608	1.03743	0.9036	0.815023	0.622022	0.553031	0.0374336	0.00149936	-0.0270349	0.024204	0.0394229	0.0755249	NO
Q7L2E3	Putative ATP-dependent RNA helicase DHX30	DHX30	30984	22510	16197	11334	8681.9	33602	20640	17725	12108	8137.5	33489.3	21701.6	17020.5	11823	8009.78	1	0.726504	0.522754	0.365802	0.280206	1.08086	0.700414	0.549332	0.381583	0.258513	0.0808581	-0.0260902	0.0265784	0.0157814	-0.0216926	0.0754351	NO
P42765	3-ketoacyl-CoA thiolase, mitochondrial	ACAA2	638010	574450	542170	375590	397960	648960	545880	533660	445870	414150	646784	573957	512449	435374	407650	1	0.900378	0.849783	0.58869	0.623752	1.01375	0.899606	0.803199	0.682394	0.638939	0.0137515	-0.000772052	-0.0465836	0.0937039	0.0151873	0.075287	NO
Q15596	Nuclear receptor coactivator 2	NCOA2	113950	100620	90826	66557	56916	122100	93685	95179	70401	58023	121691	98503.7	91396	68743.7	57112.3	1	0.883019	0.797069	0.58409	0.499482	1.06793	0.864447	0.802071	0.60328	0.501205	0.067929	-0.0185722	0.00500243	0.0191902	0.00172258	0.0752721	NO
O75391	Sperm-associated antigen 7	SPAG7	361480	323090	326530	272200	261360	373060	314590	339840	278240	275520	371809	330771	326333	271690	271196	1	0.893798	0.903314	0.753015	0.723028	1.02857	0.915046	0.902769	0.751605	0.750237	0.0285738	0.0212487	-0.000545644	-0.0014106	0.027209	0.0750753	NO
P63218	Guanine nucleotide-binding protein G(I)/G(S)/G(O) subunit gamma-5	GNG5	67200	58801	57507	42213	41967	68720	51319	58265	50743	45490	68489.5	53958.6	55949.2	49548.5	44776	1	0.875015	0.855759	0.62817	0.624509	1.01919	0.802955	0.832577	0.737329	0.66631	0.0191895	-0.0720595	-0.0231815	0.109159	0.0418006	0.0749081	NO
Q9BVC5	Ashwin	C2orf49	116090	98441	89267	70551	66015	115090	92077	95249	76274	72735	114704	96813	91463.2	74478.5	71593.4	1	0.847971	0.768947	0.607727	0.568654	0.988061	0.833948	0.787865	0.641558	0.616706	-0.0119388	-0.0140236	0.0189185	0.0338313	0.0480521	0.0748394	NO
Q86V48	Leucine zipper protein 1	LUZP1	389730	333480	310480	255580	230850	401430	321470	330410	265340	238550	400084	338005	317278	259094	234806	1	0.855669	0.796654	0.655787	0.592333	1.02657	0.86728	0.814096	0.664803	0.602483	0.0265664	0.0116102	0.0174417	0.0090159	0.0101501	0.0747843	NO
Q14789	Golgin subfamily B member 1	GOLGB1	181030	171590	143830	98006	80758	180420	167950	158750	99837	83733	179815	176589	152440	97486.8	82418.8	1	0.947854	0.794509	0.54138	0.446103	0.993288	0.975466	0.842072	0.538512	0.455277	-0.00671202	0.0276116	0.0475631	-0.0028681	0.0091739	0.0747685	NO
P05455	Lupus La protein	SSB	2982200	2514300	2726400	2066700	2135300	2931500	2475300	2754300	2346000	2222800	2.92167e+06	2.60262e+06	2.64483e+06	2.29077e+06	2.18791e+06	1	0.843102	0.914224	0.693012	0.716015	0.979702	0.872717	0.886871	0.768149	0.733657	-0.0202976	0.0296149	-0.027353	0.0751372	0.0176419	0.0747433	NO
P40925	Malate dehydrogenase, cytoplasmic	MDH1	2142200	2005300	1966900	1575000	1672400	2154600	1899300	1955300	1738100	1831500	2.14737e+06	1.99699e+06	1.87758e+06	1.69718e+06	1.80275e+06	1	0.936094	0.918168	0.735225	0.780693	1.00242	0.932215	0.876475	0.792262	0.841543	0.00241531	-0.00387882	-0.0416932	0.0570368	0.0608502	0.0747303	NO
Q9Y508	E3 ubiquitin-protein ligase RNF114	RNF114	600360	580880	539900	274290	130320	576900	582690	551310	321280	142060	574965	612661	529398	313717	139830	1	0.967553	0.899294	0.456876	0.21707	0.957701	1.02049	0.8818	0.522548	0.232911	-0.0422992	0.0529362	-0.0174933	0.0656721	0.0158409	0.0746567	NO
Q13131	5-AMP-activated protein kinase catalytic subunit alpha-1	PRKAA1	457410	358090	209470	106730	84237	440330	314130	272820	133090	90425	438853	330287	261977	129957	89005.7	1	0.782864	0.457948	0.233336	0.184161	0.959431	0.722082	0.572739	0.284115	0.194586	-0.0405692	-0.0607828	0.114791	0.0507794	0.0104255	0.0746438	YES
Q96S90	LysM and putative peptidoglycan-binding domain-containing protein 1	LYSMD1	16479	14179	13504	13138	11724	17392	12907	15063	13349	12038	17333.7	13570.9	14464.3	13034.8	11849.1	1	0.860428	0.819467	0.797257	0.711451	1.05186	0.823525	0.877742	0.790992	0.71904	0.0518643	-0.0369031	0.0582746	-0.00626506	0.00758875	0.0745595	NO
P29401	Transketolase	TKT	2690500	2462200	2414500	1982400	2095200	2840600	2350300	2330200	2205700	2185900	2.83107e+06	2.47119e+06	2.23758e+06	2.15378e+06	2.15159e+06	1	0.915146	0.897417	0.736815	0.77874	1.05225	0.918487	0.831661	0.800512	0.799699	0.0522481	0.00334066	-0.0657558	0.063697	0.0209592	0.0744892	NO
Q9BXF3	Cat eye syndrome critical region protein 2	CECR2	48005	40344	40047	30358	27677	47024	38857	41705	32940	30544	46866.3	40855.6	40047.4	32164.6	30064.6	1	0.840412	0.834226	0.632392	0.576544	0.976279	0.85107	0.834234	0.670026	0.62628	-0.0237206	0.0106576	8.29379e-06	0.0376331	0.0497363	0.0743147	NO
Q9BY77	Polymerase delta-interacting protein 3	POLDIP3	276700	246990	241200	199150	182360	275400	242890	254350	209470	191310	274476	255383	244241	204539	188307	1	0.892627	0.871702	0.719733	0.659053	0.991964	0.92296	0.882691	0.739208	0.680547	-0.00803619	0.0303328	0.0109889	0.0194759	0.0214935	0.0742549	NO
Q16881	Thioredoxin reductase 1, cytoplasmic	TXNRD1	1507800	1392200	1344800	1119900	1101000	1536000	1299400	1385500	1192700	1204400	1.53085e+06	1.36623e+06	1.33043e+06	1.16462e+06	1.1855e+06	1	0.923332	0.891895	0.742738	0.730203	1.01529	0.906111	0.882366	0.772399	0.786242	0.0152863	-0.0172206	-0.00952906	0.0296613	0.0560393	0.0742373	NO
Q9Y6I4	Ubiquitin carboxyl-terminal hydrolase 3	USP3	16573	12605	11423	10403	8641.7	17712	14014	12109	8808.3	8391.6	17652.6	14734.8	11627.7	8600.95	8259.89	1	0.760574	0.689254	0.627708	0.521432	1.06514	0.889085	0.701606	0.518974	0.498394	0.065142	0.128511	0.0123525	-0.108734	-0.0230382	0.0742331	NO
Q13564	NEDD8-activating enzyme E1 regulatory subunit	NAE1	773880	698480	627420	498360	499820	798710	651240	644830	550360	526180	796031	684737	619201	537404	517921	1	0.902569	0.810746	0.643976	0.645862	1.02862	0.88481	0.800125	0.694428	0.669253	0.0286238	-0.017759	-0.0106209	0.0504526	0.0233902	0.0740866	NO
O95825	Quinone oxidoreductase-like protein 1	CRYZL1	414990	378240	366890	274380	299280	423510	358160	360100	306510	325880	422090	376582	345788	299295	320765	1	0.911444	0.884094	0.661173	0.721174	1.01711	0.907448	0.833243	0.721209	0.772947	0.017108	-0.00399524	-0.0508506	0.0600366	0.0517725	0.0740714	NO
Q04828	Aldo-keto reductase family 1 member C1	AKR1C1	672650	574910	413330	146780	79469	697430	525880	460230	176030	76257	695091	552929	441938	171886	75060.1	1	0.854694	0.61448	0.218212	0.118143	1.03336	0.822015	0.65701	0.255536	0.111589	0.0333621	-0.0326786	0.0425299	0.0373243	-0.00655454	0.0739831	NO
Q96S44	TP53-regulating kinase	TP53RK	398180	322950	286590	201670	159800	410130	302580	299820	225840	165820	408755	318143	287903	220524	163217	1	0.811065	0.71975	0.506479	0.401326	1.02656	0.798994	0.723048	0.553829	0.409908	0.0265572	-0.0120718	0.00329848	0.0473495	0.00858239	0.0737157	YES
Q9NVE7	Pantothenate kinase 4	PANK4	604850	535390	448060	270660	194230	616540	508300	469680	320420	187900	614472	534444	451012	312877	184951	1	0.885162	0.740779	0.447483	0.321121	1.01591	0.883598	0.74566	0.517281	0.30578	0.0159086	-0.00156321	0.00488081	0.0697977	-0.0153414	0.0736825	NO
Q9Y371	Endophilin-B1	SH3GLB1	306220	245470	225630	160810	124730	333500	232480	229910	171000	122780	332382	244438	220772	166975	120853	1	0.801613	0.736823	0.525145	0.407322	1.08543	0.798242	0.720959	0.545277	0.39466	0.0854338	-0.00337128	-0.0158643	0.0201312	-0.0126612	0.0736682	NO
Q96A35	39S ribosomal protein L24, mitochondrial	MRPL24	89645	71516	56201	34450	25950	100770	60186	59712	40129	24513	100432	63281.7	57338.7	39184.3	24128.3	1	0.797769	0.626928	0.384294	0.289475	1.12033	0.705914	0.63962	0.437106	0.269153	0.120331	-0.0918548	0.0126911	0.0528121	-0.0203218	0.0736573	NO
Q13228	Selenium-binding protein 1	SELENBP1	743200	672520	678540	564560	577410	775730	642060	663580	615020	614630	773128	675084	637205	600542	604983	1	0.904898	0.912998	0.759634	0.776924	1.04027	0.908348	0.857381	0.808049	0.814024	0.0402697	0.00345056	-0.055617	0.0484151	0.0371003	0.0736187	NO
Q15025	TNFAIP3-interacting protein 1	TNIP1	58987	49352	41325	31825	26234	60133	47588	42423	37269	25366	59931.3	50035.7	40736.9	36391.7	24967.9	1	0.836659	0.700578	0.539526	0.444742	1.01601	0.84825	0.690607	0.616944	0.423277	0.0160091	0.0115906	-0.00997066	0.0774182	-0.0214647	0.0735827	NO
Q6PGN9	Proline/serine-rich coiled-coil protein 1	PSRC1	58764	51279	46263	37179	28690	60762	50177	53223	35177	28165	60558.2	52757.9	51107.6	34348.9	27722.9	1	0.872626	0.787268	0.632683	0.488224	1.03053	0.897792	0.869709	0.584523	0.471767	0.0305327	0.0251661	0.0824417	-0.0481602	-0.0164568	0.0735235	NO
O95571	Persulfide dioxygenase ETHE1, mitochondrial	ETHE1	204870	188110	180640	150360	131960	200500	176820	194860	158990	145160	199828	185915	187115	155247	142882	1	0.918192	0.88173	0.733929	0.644116	0.975387	0.907477	0.913336	0.757784	0.697426	-0.0246128	-0.0107153	0.031606	0.0238556	0.05331	0.0734435	NO
Q8N573	Oxidation resistance protein 1	OXR1	442280	403670	400490	325050	291940	466910	386280	402380	334200	316670	465344	406148	386387	326333	311700	1	0.912702	0.905512	0.734942	0.66008	1.05215	0.918306	0.873625	0.737842	0.704756	0.0521482	0.00560363	-0.0318869	0.00290036	0.0446768	0.0734421	NO
Q04759	Protein kinase C theta type	PRKCQ	78268	60061	33592	25395	18535	57089	48104	49307	35721	32400	56897.5	50578.2	47347.2	34880.1	31891.5	1	0.767376	0.429192	0.324462	0.236815	0.726958	0.646219	0.604938	0.44565	0.407465	-0.273042	-0.121158	0.175746	0.121188	0.17065	0.0733837	YES
Q9Y312	Protein AAR2 homolog	AAR2	55173	46510	44558	36499	31801	56814	42577	47099	39072	34355	56623.5	44767	45227	38152.2	33815.8	1	0.842985	0.807605	0.661537	0.576387	1.02629	0.811392	0.819731	0.691502	0.612904	0.0262893	-0.0315924	0.0121257	0.0299644	0.0365174	0.0733044	NO
P69891	Hemoglobin subunit gamma-1	HBG1	73841	68612	57748	42692	41482	75056	66577	59599	45122	44364	74804.3	70001.4	57230.2	44059.8	43667.7	1	0.929186	0.782059	0.578161	0.561775	1.01305	0.948002	0.775046	0.596685	0.591374	0.0130454	0.0188161	-0.00701256	0.0185237	0.0295998	0.0729723	NO
P48507	Glutamate--cysteine ligase regulatory subunit	GCLM	327530	288060	252800	156730	115750	332930	277050	265680	180140	112380	331813	291300	255120	175899	110616	1	0.879492	0.771838	0.478521	0.353403	1.01308	0.889385	0.778922	0.537048	0.337728	0.013078	0.00989256	0.00708428	0.0585272	-0.0156745	0.0729075	NO
Q13459	Unconventional myosin-IXb	MYO9B	205550	176820	172390	132840	132700	200630	166900	175090	149740	147730	199957	175485	168131	146215	145411	1	0.860229	0.838677	0.646266	0.645585	0.972791	0.853732	0.817956	0.711336	0.707425	-0.0272092	-0.00649707	-0.0207205	0.0650696	0.0618403	0.072483	NO
Q96CB8	Integrator complex subunit 12	INTS12	114800	96997	87741	73285	62577	110500	94155	95671	75209	70391	110129	98997.9	91868.5	73438.5	69286.2	1	0.844922	0.764294	0.638371	0.545096	0.959315	0.862351	0.800248	0.639709	0.603538	-0.0406845	0.0174292	0.0359536	0.00133749	0.0584422	0.072478	NO
Q9NX38	Protein Simiate	FAM206A	95084	85072	86080	65068	60464	98022	83149	86983	70181	62449	97693.3	87425.8	83525.8	68528.9	61468.8	1	0.894704	0.905305	0.684321	0.635901	1.02744	0.919458	0.878442	0.72072	0.646469	0.0274417	0.0247548	-0.0268627	0.0363984	0.0105677	0.0722998	NO
Q08209	Serine/threonine-protein phosphatase 2B catalytic subunit alpha isoform	PPP3CA	400790	372150	365320	343140	305730	416490	360920	379160	338250	332360	415093	379484	364090	330287	327143	1	0.928541	0.9115	0.856159	0.762818	1.03569	0.94684	0.908431	0.824091	0.816246	0.0356875	0.0182988	-0.00306906	-0.0320681	0.0534279	0.0722771	NO
P78330	Phosphoserine phosphatase	PSPH	164900	164520	143550	130080	120600	159760	160960	150370	131540	136400	159224	169239	144393	128443	134259	1	0.997696	0.870528	0.788842	0.731352	0.96558	1.02631	0.875642	0.778917	0.814185	-0.0344196	0.0286174	0.00511469	-0.00992429	0.0828327	0.0722208	NO
Q96SB3	Neurabin-2	PPP1R9B	393010	321590	186180	103550	89198	399210	295960	228900	112170	84833	397871	311183	219802	109529	83501.5	1	0.818274	0.473728	0.263479	0.226961	1.01237	0.791793	0.559279	0.278694	0.212467	0.0123691	-0.0264809	0.0855504	0.0152145	-0.0144946	0.0721585	NO
Q13510	Acid ceramidase;Acid ceramidase subunit alpha;Acid ceramidase subunit beta	ASAH1	377730	343320	344840	261710	262710	379930	328960	350030	287610	280460	378656	345880	336118	280840	276058	1	0.908903	0.912927	0.692849	0.695497	1.00245	0.915681	0.889836	0.743493	0.730834	0.00245102	0.00677762	-0.0230912	0.0506434	0.0353374	0.0721181	NO
Q01433	AMP deaminase 2	AMPD2	756250	705180	685620	569540	554840	761460	686970	676170	609550	609690	758906	722304	649295	595201	600120	1	0.932469	0.906605	0.753111	0.733673	1.00351	0.955113	0.858572	0.787043	0.793548	0.00351244	0.0226438	-0.048033	0.0339318	0.059875	0.07193	NO
Q9Y3B8	Oligoribonuclease, mitochondrial	REXO2	683220	585200	597160	447930	462700	670580	564600	605840	508960	492330	668331	593640	581760	496979	484603	1	0.856532	0.874038	0.655616	0.677234	0.978208	0.868886	0.851498	0.727407	0.709292	-0.0217923	0.0123537	-0.0225398	0.0717907	0.0320578	0.0718701	NO
Q9H0L4	Cleavage stimulation factor subunit 2 tau variant	CSTF2T	670370	594380	600300	433120	399920	636850	575590	620650	472440	456180	634714	605196	595982	461319	449020	1	0.886645	0.895476	0.646091	0.596566	0.946812	0.902778	0.889034	0.688155	0.669809	-0.0531883	0.0161337	-0.00644164	0.0420641	0.073243	0.071811	NO
Q96ES7	SAGA-associated factor 29 homolog	CCDC101	35580	31425	30467	26551	23357	36369	30839	32715	27290	23568	36247	32425.2	31414.7	26647.6	23198.1	1	0.883221	0.856296	0.746234	0.656464	1.01875	0.911332	0.882932	0.748948	0.651998	0.0187473	0.0281115	0.0266361	0.00271445	-0.00446646	0.071743	NO
Q96L73	Histone-lysine N-methyltransferase, H3 lysine-36 and H4 lysine-20 specific	NSD1	45661	39075	40187	40539	35241	52718	38837	41254	39728	32708	52541.2	40834.6	39614.3	38792.8	32194.6	1	0.855763	0.880117	0.887825	0.771797	1.15068	0.894299	0.867575	0.849582	0.705079	0.15068	0.0385359	-0.0125419	-0.0382431	-0.0667172	0.0717137	NO
Q9Y2H0	Disks large-associated protein 4	DLGAP4	329820	301910	297960	247580	261700	332180	286090	308210	274330	271170	331066	300805	295960	267872	266914	1	0.915378	0.903402	0.750652	0.793463	1.00378	0.912028	0.897338	0.812177	0.809271	0.00377771	-0.00335006	-0.00606415	0.0615249	0.015808	0.0716964	NO
Q2KHR3	Glutamine and serine-rich protein 1	QSER1	157660	139650	145890	115940	109550	156140	140230	149930	122760	114880	155616	147443	143971	119870	113077	1	0.885767	0.925346	0.73538	0.69485	0.987038	0.935194	0.913173	0.760308	0.71722	-0.0129624	0.0494276	-0.0121724	0.0249281	0.0223701	0.0715911	NO
Q9UEY8	Gamma-adducin	ADD3	505530	457690	444900	351640	320220	510790	437750	460110	377770	341390	509077	460266	441823	368877	336032	1	0.905367	0.880066	0.695587	0.633434	1.00702	0.910462	0.873979	0.729684	0.664712	0.00701631	0.00509513	-0.00608762	0.0340971	0.0312774	0.0713983	NO
O00151	PDZ and LIM domain protein 1	PDLIM1	1163800	1013200	1024200	712430	560780	1213300	947620	1036900	827080	557310	1.20923e+06	996361	995687	807610	548563	1	0.870596	0.880048	0.612158	0.481853	1.03904	0.856127	0.855549	0.693942	0.471355	0.0390367	-0.014469	-0.0244995	0.0817839	-0.0104978	0.0713543	NO
Q5TCQ9	Membrane-associated guanylate kinase, WW and PDZ domain-containing protein 3	MAGI3	101330	94082	84630	79416	71719	105330	90514	92686	80137	72127	104977	95169.6	89002.1	78250.5	70994.9	1	0.928471	0.835192	0.783736	0.707777	1.03599	0.939205	0.878339	0.772235	0.700631	0.0359889	0.0107333	0.0431473	-0.0115017	-0.00714581	0.0712219	NO
P38432	Coilin	COIL	142830	122420	113480	80684	69525	139380	118390	121800	89222	72758	138913	124479	116959	87121.7	71616	1	0.857103	0.794511	0.564895	0.486767	0.972573	0.871521	0.818868	0.609968	0.501407	-0.0274273	0.0144186	0.0243573	0.0450723	0.0146399	0.0710607	NO
Q06203	Amidophosphoribosyltransferase	PPAT	859780	780500	782770	641290	649950	867060	751100	773970	695780	710000	864152	789733	743208	679401	698856	1	0.90779	0.910431	0.745877	0.755949	1.00509	0.918529	0.864416	0.790203	0.812831	0.00508517	0.0107387	-0.0460142	0.0443265	0.056882	0.0710182	NO
Q86YP4	Transcriptional repressor p66-alpha	GATAD2A	551620	484500	393750	305510	311900	558470	442490	416520	332660	345160	556597	465250	399965	324829	339742	1	0.878322	0.713807	0.553841	0.565425	1.00902	0.843424	0.725074	0.588864	0.615899	0.00902261	-0.034898	0.0112669	0.0350223	0.050474	0.0708878	NO
Q9Y3D2	Methionine-R-sulfoxide reductase B2, mitochondrial	MSRB2	31977	26597	27649	22530	19224	31081	26657	31727	22042	19554	30976.8	28028.1	30466	21523.1	19247.1	1	0.831754	0.864653	0.704569	0.601182	0.96872	0.876508	0.952747	0.673081	0.601904	-0.0312799	0.0447543	0.088094	-0.0314876	0.000721955	0.0708027	NO
Q9UNN5	FAS-associated factor 1	FAF1	963560	856060	872680	695360	624290	1013400	833040	891730	753440	611880	1.01e+06	875888	856287	735704	602276	1	0.888435	0.905683	0.721657	0.647899	1.0482	0.909012	0.888671	0.763527	0.625053	0.0481977	0.0205774	-0.0170125	0.0418694	-0.0228464	0.0707855	NO
A4D1P6	WD repeat-containing protein 91	WDR91	468890	432010	390920	294590	280400	478750	407840	401490	315960	304760	477144	428817	385532	308522	299977	1	0.921346	0.833714	0.628271	0.598008	1.0176	0.914537	0.822224	0.657984	0.639759	0.0176041	-0.00680903	-0.0114901	0.029713	0.0417509	0.070769	NO
O14530	Thioredoxin domain-containing protein 9	TXNDC9	261560	236040	220520	167090	149600	265160	218620	227910	186960	160260	264271	229865	218852	182559	157745	1	0.902432	0.843095	0.638821	0.571953	1.01036	0.878822	0.836716	0.697962	0.603091	0.0103637	-0.0236093	-0.00637897	0.0591408	0.0311386	0.0706548	NO
Q9UL15	BAG family molecular chaperone regulator 5	BAG5	265040	232960	215010	154070	120610	271760	229630	228040	163510	117330	270849	241441	218976	159661	115488	1	0.878962	0.811236	0.581308	0.455063	1.02192	0.910961	0.826201	0.602403	0.43574	0.0219159	0.0319992	0.0149651	0.0210945	-0.0193238	0.0706509	NO
P20340	Ras-related protein Rab-6A	RAB6A	413640	382750	365160	283330	275030	421530	351510	370160	309900	306100	420116	369590	355448	302605	301296	1	0.925322	0.882797	0.684968	0.664902	1.01566	0.893506	0.859316	0.731566	0.7284	0.0156569	-0.0318152	-0.0234802	0.046598	0.0634986	0.0704581	NO
O15355	Protein phosphatase 1G	PPM1G	1189300	990860	955090	674720	591660	1237500	952210	987310	749900	579660	1.23335e+06	1.00119e+06	948068	732247	570562	1	0.833146	0.803069	0.567325	0.497486	1.03704	0.841829	0.797165	0.615696	0.479746	0.0370384	0.00868332	-0.0059039	0.0483705	-0.01774	0.0704483	NO
O75695	Protein XRP2	RP2	50710	46605	45829	41065	35170	51371	45526	46930	41032	39372	51198.7	47867.6	45064.7	40066.1	38754	1	0.919049	0.903747	0.809801	0.693552	1.00964	0.943949	0.888675	0.790102	0.764229	0.00963747	0.0248992	-0.0150715	-0.0196985	0.070677	0.0704436	NO
Q6YP21	Kynurenine--oxoglutarate transaminase 3	CCBL2	1008100	916520	899380	651950	641360	990460	866310	909350	738690	706690	987138	910869	873207	721301	695598	1	0.909156	0.892154	0.646712	0.636207	0.979207	0.90355	0.866191	0.715505	0.690009	-0.0207933	-0.0056058	-0.0259626	0.0687936	0.0538022	0.0702341	NO
P18206	Vinculin	VCL	4951600	4459500	4506900	3660500	3783700	4895500	4390100	4535900	3977100	4038800	4.87908e+06	4.61591e+06	4.35562e+06	3.88348e+06	3.97541e+06	1	0.900618	0.910191	0.739256	0.764137	0.985355	0.932205	0.879638	0.784287	0.802853	-0.0146454	0.0315869	-0.0305524	0.0450313	0.0387164	0.0701368	NO
O43837	Isocitrate dehydrogenase [NAD] subunit beta, mitochondrial	IDH3B	34187	28659	24132	21543	19267	35223	26608	27824	20886	20307	35104.9	27976.6	26718.1	20394.3	19988.3	1	0.838301	0.705882	0.630152	0.563577	1.02685	0.81834	0.781528	0.596552	0.584674	0.0268486	-0.0199612	0.075646	-0.0335995	0.0210977	0.0700316	NO
O75886	Signal transducing adapter molecule 2	STAM2	303220	268240	264670	213810	200640	312240	254830	273900	231270	207070	311193	267937	263014	225826	203820	1	0.884638	0.872865	0.705132	0.661698	1.02629	0.88364	0.867402	0.744759	0.672185	0.0262939	-0.000998546	-0.00546269	0.0396273	0.0104871	0.069947	NO
P62140	Serine/threonine-protein phosphatase PP1-beta catalytic subunit	PPP1CB	185490	168440	163000	125130	119890	191450	156860	168010	137240	125810	190808	164928	161332	134009	123835	1	0.908081	0.878754	0.674592	0.646342	1.02867	0.889148	0.869763	0.722461	0.667612	0.0286696	-0.018933	-0.00899081	0.0478694	0.0212697	0.069885	NO
Q9UBF6	RING-box protein 2	RNF7	67035	69217	65681	61376	54870	70480	66042	68447	61856	57947	70243.6	69438.9	65726.5	60399.9	57037.5	1	1.03255	0.979802	0.915581	0.818528	1.04786	1.03586	0.980481	0.90102	0.850861	0.047865	0.00330992	0.000678957	-0.0145614	0.0323336	0.0696261	NO
Q1KMD3	Heterogeneous nuclear ribonucleoprotein U-like protein 2	HNRNPUL2	957350	840310	726400	484460	392540	899320	838700	789050	507490	443270	896304	881839	757689	495543	436313	1	0.877746	0.758761	0.506043	0.410028	0.936234	0.921125	0.791444	0.51762	0.45575	-0.0637657	0.0433788	0.0326824	0.0115772	0.0457226	0.0695954	NO
Q16254	Transcription factor E2F4	E2F4	86587	78544	71791	49289	40691	86561	74464	76074	53572	43683	86270.7	78294.1	73050.4	52310.9	42997.4	1	0.907111	0.82912	0.569242	0.469944	0.996347	0.904224	0.843664	0.604143	0.49658	-0.00365298	-0.00288649	0.0145446	0.0349	0.0266364	0.0695415	NO
P12004	Proliferating cell nuclear antigen	PCNA	843290	744040	775040	629490	616140	868000	728820	770050	665540	656170	865089	766307	739444	649873	645871	1	0.882306	0.919067	0.746469	0.730638	1.02585	0.908711	0.876856	0.77064	0.765894	0.0258499	0.0264049	-0.0422112	0.0241706	0.0352559	0.0694701	NO
Q7Z417	Nuclear fragile X mental retardation-interacting protein 2	NUFIP2	702910	634280	639590	505160	507500	694350	626970	627530	562710	543470	692021	659218	602588	549464	534940	1	0.902363	0.909917	0.71867	0.721999	0.984509	0.937842	0.857277	0.781698	0.761036	-0.0154908	0.0354787	-0.0526408	0.0630287	0.0390375	0.0694133	NO
P0DMV9	Heat shock 70 kDa protein 1B;Heat shock 70 kDa protein 1A	HSPA1B;HSPA1A	2924900	2657300	2740000	2191600	2374100	3010500	2522200	2629200	2433600	2578000	3.0004e+06	2.65193e+06	2.5247e+06	2.37631e+06	2.53754e+06	1	0.90851	0.936784	0.749291	0.811686	1.02581	0.906674	0.863175	0.812442	0.867563	0.0258141	-0.00183605	-0.0736093	0.0631515	0.0558776	0.0693979	NO
O15084	Serine/threonine-protein phosphatase 6 regulatory ankyrin repeat subunit A	ANKRD28	364620	304160	244100	148320	115470	368110	282140	281770	159290	114080	366875	296652	270571	155540	112289	1	0.834184	0.669464	0.40678	0.316686	1.00619	0.813592	0.742062	0.426582	0.307963	0.00618579	-0.0205915	0.0725983	0.0198021	-0.00872296	0.0692717	NO
Q14139	Ubiquitin conjugation factor E4 A	UBE4A	490820	464400	402850	267390	177780	497480	449890	436940	288960	169110	495812	473030	419573	282158	166456	1	0.946172	0.820769	0.544782	0.36221	1.01017	0.963755	0.854842	0.57487	0.339138	0.0101699	0.0175832	0.0340724	0.0300879	-0.0230722	0.0688412	NO
Q99426	Tubulin-folding cofactor B	TBCB	460290	416370	400410	330700	314590	493770	398990	410710	327940	333040	492114	419512	394386	320220	327813	1	0.904582	0.869908	0.71846	0.68346	1.06914	0.911408	0.856821	0.695692	0.712187	0.0691391	0.00682638	-0.0130875	-0.022768	0.0287269	0.0688369	NO
Q12907	Vesicular integral-membrane protein VIP36	LMAN2	117600	101660	89614	83689	77180	114800	98811	104210	81741	80914	114415	103893	100068	79816.8	79644	1	0.864456	0.762024	0.711641	0.656293	0.972917	0.883447	0.850919	0.678714	0.677245	-0.0270834	0.0189912	0.0888953	-0.0329271	0.0209524	0.0688283	NO
P04062	Glucosylceramidase	GBA	92851	81383	78970	63991	60133	88256	78227	83682	68862	66958	87960	82250.6	80356	67241	65907	1	0.87649	0.850502	0.689179	0.647629	0.947324	0.885834	0.865429	0.724181	0.709815	-0.0526756	0.0093442	0.014927	0.0350018	0.0621862	0.0687835	NO
P08238	Heat shock protein HSP 90-beta	HSP90AB1	12731000	11073999	10683000	8543500	7994900	14265000	9526200	11034000	9159100	8258000	14217160	10016181	10595444	8.94349e+06	8.12838e+06	1	0.869845	0.839133	0.671078	0.627987	1.11674	0.786755	0.832255	0.702497	0.638472	0.116735	-0.08309	-0.00687739	0.0314186	0.010485	0.0686717	NO
P24386	Rab proteins geranylgeranyltransferase component A 1	CHM	82952	76297	73526	63266	59352	85051	73423	75976	64146	64544	84765.8	77199.5	72956.3	62636	63530.9	1	0.919773	0.886368	0.762682	0.715498	1.02187	0.930653	0.8795	0.755087	0.765876	0.0218652	0.0108801	-0.00686822	-0.00759509	0.0503778	0.0686597	NO
Q9Y4A5	Transformation/transcription domain-associated protein	TRRAP	115540	95353	86789	74121	60969	127690	89645	87759	68212	69395	127262	94255.9	84270.9	66606.3	68305.8	1	0.825281	0.75116	0.641518	0.527687	1.10145	0.815786	0.729366	0.576478	0.591187	0.101452	-0.00949537	-0.0217938	-0.0650402	0.0635001	0.0686227	YES
Q9Y2U8	Inner nuclear membrane protein Man1	LEMD3	68541	58614	54847	39450	41159	68740	55127	53264	46427	45067	68509.5	57962.5	51147	45334.1	44359.6	1	0.855167	0.800207	0.575568	0.600502	0.99954	0.845661	0.746225	0.661416	0.647199	-0.00046008	-0.00950576	-0.0539826	0.0858477	0.0466967	0.0685959	NO
Q9UBB5	Methyl-CpG-binding domain protein 2	MBD2	77040	63639	59697	51078	40306	76900	65358	63715	51917	40434	76642.1	68719.7	61182.6	50694.8	39799.4	1	0.826051	0.774883	0.663006	0.523183	0.994835	0.892	0.794167	0.658033	0.516606	-0.00516486	0.0659488	0.0192834	-0.00497341	-0.00657633	0.0685176	NO
Q9P270	SLAIN motif-containing protein 2	SLAIN2	313940	300250	287750	252610	231610	308170	296670	296590	252540	261250	307136	311929	284802	246595	257149	1	0.956393	0.916576	0.804644	0.737752	0.978329	0.993595	0.907185	0.785485	0.819104	-0.0216714	0.0372022	-0.00939106	-0.0191594	0.0813515	0.0683319	NO
Q9Y520	Protein PRRC2C	PRRC2C	1861000	1620600	1711000	1376400	1366100	1861500	1580800	1708000	1493200	1469700	1.85526e+06	1.66211e+06	1.64011e+06	1.45805e+06	1.44663e+06	1	0.870822	0.919398	0.739602	0.734068	0.996914	0.893127	0.881308	0.783476	0.777341	-0.00308594	0.0223045	-0.0380903	0.0438739	0.0432735	0.0682757	NO
Q9NXW9	Alpha-ketoglutarate-dependent dioxygenase alkB homolog 4	ALKBH4	256420	223560	225530	190710	174160	266570	216260	223780	204140	183470	265676	227383	214886	199334	180590	1	0.871851	0.879534	0.743741	0.679198	1.0361	0.886761	0.838022	0.777375	0.704275	0.036097	0.0149106	-0.0415113	0.0336341	0.0250772	0.0682076	NO
P21912	Succinate dehydrogenase [ubiquinone] iron-sulfur subunit, mitochondrial	SDHB	33544	31521	27281	25419	23299	38297	29394	26259	27719	22345	38168.6	30905.9	25215.3	27066.5	21994.3	1	0.939691	0.81329	0.757781	0.69458	1.13787	0.921354	0.751709	0.806895	0.655684	0.137866	-0.0183376	-0.0615814	0.049114	-0.0388958	0.0681648	NO
P49591	Serine--tRNA ligase, cytoplasmic	SARS	1100100	974650	1011800	791920	776460	1101800	942350	1012300	882420	820140	1.0981e+06	990820	972065	861647	807267	1	0.885965	0.919735	0.719862	0.705809	0.998186	0.900664	0.883615	0.783245	0.733813	-0.00181358	0.0146986	-0.0361192	0.0633828	0.0280041	0.0681527	NO
Q9BYW2	Histone-lysine N-methyltransferase SETD2	SETD2	243480	208500	203620	170950	154630	256540	201500	209440	175520	160240	255680	211864	201116	171388	157725	1	0.856333	0.83629	0.702111	0.635083	1.05011	0.87015	0.826005	0.703911	0.647794	0.0501053	0.0138171	-0.0102858	0.00179963	0.0127112	0.0681474	NO
Q92905	COP9 signalosome complex subunit 5	COPS5	455920	420600	413050	325300	340200	432730	415040	413440	358350	377460	431279	436388	397007	349914	371535	1	0.92253	0.90597	0.713502	0.746184	0.945953	0.957158	0.870783	0.76749	0.814914	-0.0540473	0.0346281	-0.0351872	0.0539881	0.0687302	0.068112	NO
Q8N4C8	Misshapen-like kinase 1	MINK1	109730	94572	81824	69082	60397	114920	93429	86603	67469	62239	114535	98234.5	83160.9	65880.7	61262.1	1	0.861861	0.745685	0.629563	0.550415	1.04379	0.895239	0.757868	0.60039	0.558299	0.0437856	0.0333777	0.0121834	-0.0291739	0.00788403	0.0680568	YES
Q9GZQ8	Microtubule-associated proteins 1A/1B light chain 3B;Microtubule-associated proteins 1A/1B light chain 3 beta 2;Microtubule-associated proteins 1A/1B light chain 3A	MAP1LC3B;MAP1LC3B2;MAP1LC3A	119190	110260	118800	92837	100210	118920	108090	115290	105840	104820	118521	113650	110708	103348	103175	1	0.925078	0.996728	0.778899	0.840758	0.994389	0.953516	0.928834	0.86709	0.865633	-0.00561141	0.0284388	-0.0678941	0.0881909	0.0248744	0.0679986	NO
Q9BRR8	G patch domain-containing protein 1	GPATCH1	27215	23749	21361	16873	11697	27713	22946	23794	15786	12936	27620.1	24126.2	22848.3	15414.4	12733	1	0.872644	0.784898	0.619989	0.4298	1.01488	0.886505	0.839548	0.566393	0.467866	0.0148836	0.0138611	0.0546495	-0.0535958	0.0380658	0.0678643	NO
Q96I99	Succinyl-CoA ligase [GDP-forming] subunit beta, mitochondrial	SUCLG2	860520	756870	709280	513390	481970	820180	728370	752190	582770	513880	817429	765834	722294	569051	505814	1	0.87955	0.824246	0.596604	0.560092	0.949925	0.889966	0.839369	0.661288	0.587801	-0.0500751	0.0104168	0.0151229	0.0646833	0.0277092	0.067857	NO
Q8NB37	Parkinson disease 7 domain-containing protein 1	PDDC1	37603	34799	32068	23904	23163	39840	33564	33098	25192	23072	39706.4	35290.4	31782.5	24599	22709.9	1	0.925431	0.852804	0.635694	0.615988	1.05594	0.938499	0.845212	0.654176	0.603938	0.0559367	0.0130673	-0.00759272	0.0184817	-0.0120504	0.0678426	NO
P61158	Actin-related protein 3	ACTR3	1088500	964620	975220	750860	778740	1114800	932030	954560	860540	796160	1.11106e+06	979969	916620	840282	783664	1	0.886192	0.89593	0.689812	0.715425	1.02073	0.900293	0.842095	0.771964	0.719948	0.0207269	0.0141012	-0.0538354	0.082152	0.00452338	0.0676681	NO
Q9H568	Actin-like protein 8	ACTL8	12033	11256	9803.1	7760.1	6104.2	11960	10879	10991	7687	6453.1	11919.9	11438.6	10554.2	7506.04	6351.81	1	0.935428	0.814685	0.644902	0.507288	0.9906	0.950599	0.877101	0.623788	0.527866	-0.00940002	0.0151719	0.0624161	-0.0211132	0.0205779	0.0676526	NO
Q9ULH7	MKL/myocardin-like protein 2	MKL2	267940	240580	241010	202000	189610	273350	232160	249800	207500	203410	272433	244101	239871	202615	200217	1	0.897888	0.899492	0.7539	0.707658	1.01677	0.911029	0.895243	0.756197	0.747247	0.0167697	0.0131417	-0.00424916	0.00229659	0.0395885	0.0675473	NO
Q8IYB3	Serine/arginine repetitive matrix protein 1	SRRM1	194170	160740	143470	104720	113350	201000	139090	144590	121890	127120	200326	146244	138843	119021	125125	1	0.827831	0.738889	0.539321	0.583767	1.0317	0.753176	0.71506	0.612971	0.644408	0.0317037	-0.0746556	-0.0238289	0.0736502	0.0606415	0.0675108	NO
P61964	WD repeat-containing protein 5	WDR5	433820	374630	345660	258540	255590	432260	337710	352500	305160	279550	430810	355080	338490	297976	275162	1	0.863561	0.796782	0.595961	0.589161	0.993062	0.818497	0.780254	0.686866	0.634277	-0.00693762	-0.0450644	-0.0165286	0.0909049	0.0451161	0.0674905	NO
Q93045	Stathmin-2	STMN2	180330	170860	169520	151770	149400	180330	169560	171850	161230	155980	179725	178281	165020	157435	153532	1	0.947485	0.940054	0.841624	0.828481	0.996646	0.988639	0.915098	0.873036	0.851393	-0.00335371	0.0411542	-0.0249561	0.0314122	0.0229123	0.067169	NO
Q3MHD2	Protein LSM12 homolog	LSM12	167600	137970	138410	109670	104030	173840	126690	143130	120780	108800	173257	133206	137441	117937	107092	1	0.82321	0.825835	0.654356	0.620704	1.03375	0.794787	0.820055	0.70368	0.638976	0.0337529	-0.0284229	-0.00578059	0.0493245	0.0182715	0.0671454	NO
Q969H6	Ribonuclease P/MRP protein subunit POP5	POP5	64376	53208	57575	42423	41141	63310	50347	59351	48524	43313	63097.7	52936.6	56992	47381.7	42633.2	1	0.826519	0.894355	0.658988	0.639074	0.980143	0.822303	0.8853	0.736015	0.662253	-0.0198571	-0.00421577	-0.00905551	0.0770275	0.023179	0.0670781	NO
Q13596	Sorting nexin-1	SNX1	625790	546930	468270	268590	195710	658490	518040	489310	300630	185560	656282	544685	469862	293553	182648	1	0.873983	0.748286	0.429201	0.312741	1.04872	0.870397	0.75083	0.469092	0.291867	0.048725	-0.00358672	0.0025439	0.0398904	-0.0208736	0.066699	NO
Q9NQT5	Exosome complex component RRP40	EXOSC3	303180	254670	243830	154190	124840	308330	237360	259120	171920	129390	307296	249569	248821	167873	127359	1	0.839996	0.804242	0.508576	0.411769	1.01358	0.82317	0.820704	0.553707	0.420078	0.0135759	-0.0168261	0.0164623	0.0451313	0.00830903	0.0666525	NO
Q92538	Golgi-specific brefeldin A-resistance guanine nucleotide exchange factor 1	GBF1	490130	441340	420870	291940	223460	514270	427450	433400	311030	221950	512545	449436	416174	303708	218466	1	0.900455	0.858691	0.595638	0.45592	1.04573	0.916973	0.84911	0.619648	0.445731	0.0457333	0.016518	-0.00958085	0.0240104	-0.0101884	0.0664924	NO
P12694	2-oxoisovalerate dehydrogenase subunit alpha, mitochondrial	BCKDHA	155440	133430	118140	79404	58847	152010	143010	123900	80899	56636	151500	150366	118975	78994.6	55747.1	1	0.858402	0.760036	0.510834	0.378583	0.974654	0.967356	0.765411	0.5082	0.35864	-0.0253461	0.108954	0.00537497	-0.00263383	-0.019943	0.0664056	NO
Q9UBS8	E3 ubiquitin-protein ligase RNF14	RNF14	178700	146880	100620	72330	56379	210680	127360	107500	68605	53514	209973	133911	103227	66990	52674.1	1	0.821936	0.563067	0.404757	0.315495	1.17501	0.749361	0.577657	0.374874	0.294763	0.175005	-0.0725754	0.0145905	-0.0298825	-0.0207327	0.0664052	NO
Q9P2R6	Arginine-glutamic acid dipeptide repeats protein	RERE	123880	108330	101190	79841	67566	122980	103150	103050	82306	79928	122568	108456	98954.2	80368.5	78673.5	1	0.874475	0.816839	0.644503	0.545415	0.989406	0.875489	0.798791	0.648761	0.635078	-0.0105944	0.00101337	-0.0180482	0.00425797	0.0896632	0.0662918	NO
P52306	Rap1 GTPase-GDP dissociation stimulator 1	RAP1GDS1	1116400	1026900	1026100	792540	647050	1155000	1005600	1026500	893030	626640	1.15113e+06	1.05732e+06	985701	872008	616804	1	0.919832	0.919115	0.709907	0.579586	1.03111	0.947083	0.882928	0.781089	0.552494	0.0311058	0.0272512	-0.036187	0.071182	-0.027092	0.0662599	NO
Q9UBQ5	Eukaryotic translation initiation factor 3 subunit K	EIF3K	398050	355840	352590	247020	197640	427340	337050	348790	267150	204570	425907	354386	334927	260861	201359	1	0.893958	0.885793	0.620575	0.496521	1.06998	0.890306	0.84142	0.655348	0.505864	0.0699832	-0.00365226	-0.0443737	0.0347724	0.00934337	0.066073	NO
P67936	Tropomyosin alpha-4 chain	TPM4	1161900	1007500	1039300	795170	800790	1135500	969760	1082000	870750	854210	1.13169e+06	1.01964e+06	1.03899e+06	850252	840803	1	0.867114	0.894483	0.68437	0.689207	0.974001	0.877562	0.894221	0.731777	0.723645	-0.0259989	0.0104482	-0.000262536	0.0474069	0.0344372	0.0660309	NO
Q13057	Bifunctional coenzyme A synthase;Phosphopantetheine adenylyltransferase;Dephospho-CoA kinase	COASY	189780	82956	49681	37656	50254	217490	68526	47640	46425	43652	216761	72050.6	45746.5	45332.1	42966.9	1	0.437117	0.261782	0.198419	0.264801	1.14217	0.379654	0.24105	0.238867	0.226403	0.142168	-0.0574631	-0.0207319	0.0404475	-0.0383979	0.0660224	NO
Q9BRG1	Vacuolar protein-sorting-associated protein 25	VPS25	216300	191920	190940	149540	131490	213350	183090	193310	164100	145740	212634	192507	185627	160237	143453	1	0.887286	0.882755	0.691355	0.607906	0.983054	0.890001	0.858191	0.740809	0.663211	-0.0169464	0.00271504	-0.0245644	0.0494545	0.0553052	0.0659639	NO
Q9UHD8	Septin-9	44448	964420	859170	837070	680350	625740	928900	838960	865610	751470	667910	925785	882112	831206	733780	657427	1	0.890867	0.867952	0.70545	0.648825	0.959939	0.914655	0.861871	0.760851	0.681681	-0.0400606	0.0237884	-0.00608078	0.0554012	0.0328557	0.0659039	NO
Q8ND56	Protein LSM14 homolog A	LSM14A	342860	308120	311610	258850	237570	359710	300980	322550	260550	246350	358504	316461	309730	254417	242483	1	0.898676	0.908855	0.754973	0.692907	1.04563	0.923003	0.903372	0.742042	0.707237	0.0456269	0.0243276	-0.00548338	-0.0129309	0.0143305	0.0658707	NO
Q9UKZ1	CCR4-NOT transcription complex subunit 11	CNOT11	212300	173570	163840	112830	98365	214580	162750	169150	121950	110100	213860	171121	162427	119079	108372	1	0.817569	0.771738	0.531465	0.46333	1.00735	0.806034	0.765082	0.560901	0.510466	0.00734979	-0.0115352	-0.00665575	0.0294359	0.0471357	0.0657304	NO
Q6FI81	Anamorsin	CIAPIN1	1247600	1140500	1138100	880330	793110	1258000	1116700	1143100	976700	815020	1.25378e+06	1.17414e+06	1.09767e+06	953708	802228	1	0.914155	0.912231	0.705619	0.635709	1.00495	0.941117	0.879822	0.764434	0.643017	0.00495433	0.0269619	-0.032409	0.0588153	0.00730817	0.0656307	NO
Q15061	WD repeat-containing protein 43	WDR43	134890	118730	110020	100790	86519	140760	111710	119360	101990	89239	140288	117456	114616	99589.1	87838.3	1	0.880199	0.815628	0.747201	0.641404	1.04002	0.870753	0.849699	0.738299	0.651185	0.0400173	-0.00944606	0.0340717	-0.00890277	0.00978078	0.0655209	NO
O60934	Nibrin	NBN	543070	446220	428620	317150	301580	546200	430140	444310	344770	317200	544368	452264	426651	336654	312221	1	0.821662	0.789254	0.583995	0.555324	1.00239	0.832792	0.785627	0.619909	0.574919	0.00239049	0.0111299	-0.00362659	0.0359142	0.0195947	0.0654028	NO
Q96BP2	Coiled-coil-helix-coiled-coil-helix domain-containing protein 1	CHCHD1	38880	34541	35090	27220	25600	37092	34317	35750	30503	27133	36967.6	36082.1	34329.1	29784.9	26707.1	1	0.8884	0.902521	0.700103	0.658436	0.950813	0.928038	0.88295	0.766074	0.686912	-0.0491871	0.0396374	-0.0195709	0.0659708	0.0284755	0.0653257	NO
Q03164	Histone-lysine N-methyltransferase 2A;MLL cleavage product N320;MLL cleavage product C180	KMT2A	227910	208750	207470	181300	167500	226260	204750	219240	185230	178410	225501	215281	210526	180870	175610	1	0.915932	0.910315	0.795489	0.734939	0.989431	0.944589	0.923725	0.793601	0.770522	-0.0105691	0.0286576	0.0134093	-0.00188848	0.035583	0.0651923	NO
Q9UBS4	DnaJ homolog subfamily B member 11	DNAJB11	323000	264910	231520	137690	91768	328800	247520	265660	146790	84884	327697	260251	255101	143334	83551.7	1	0.820155	0.71678	0.426285	0.284111	1.01454	0.805731	0.789787	0.44376	0.258674	0.0145427	-0.0144234	0.0730065	0.0174752	-0.0254375	0.0651635	NO
Q7Z6E9	E3 ubiquitin-protein ligase RBBP6	RBBP6	541610	504200	505810	426380	403850	531560	493790	518110	443710	444280	529777	519188	497517	433265	437307	1	0.930928	0.933901	0.787245	0.745647	0.978153	0.958602	0.91859	0.799957	0.80742	-0.0218473	0.0276734	-0.0153113	0.0127118	0.0617727	0.0649993	NO
P42330	Aldo-keto reductase family 1 member C3	AKR1C3	617150	566420	516530	354510	332520	650240	543860	509310	413220	319800	648059	571834	489067	403493	314781	1	0.9178	0.83696	0.574431	0.538799	1.05008	0.926571	0.792461	0.6538	0.510055	0.0500839	0.00877181	-0.0444997	0.079369	-0.0287442	0.0649809	NO
P36954	DNA-directed RNA polymerase II subunit RPB9	POLR2I	116100	100550	83480	43516	25196	123300	90954	87304	49658	25943	122886	95632.2	83834	48489	25535.8	1	0.866064	0.719035	0.374815	0.21702	1.05845	0.823706	0.722085	0.417649	0.219947	0.0584538	-0.042358	0.00304932	0.042834	0.00292684	0.0649059	NO
P50542	Peroxisomal targeting signal 1 receptor	PEX5	51499	40886	30214	21137	18381	55935	38267	32629	21712	17207	55747.4	40235.3	31332.1	21200.9	16936.9	1	0.793918	0.586691	0.410435	0.35692	1.08249	0.781283	0.608403	0.411676	0.328879	0.082495	-0.0126358	0.0217117	0.00124059	-0.0280409	0.0647706	NO
Q96JP5	E3 ubiquitin-protein ligase ZFP91	ZFP91	77111	68359	59058	52653	41974	81427	64179	60813	48427	50612	81153.9	67480.1	58395.9	47287	49817.6	1	0.886501	0.765883	0.682821	0.544332	1.05243	0.875103	0.757297	0.613233	0.646051	0.0524298	-0.0113984	-0.00858588	-0.0695879	0.101718	0.064576	NO
O14972	Down syndrome critical region protein 3	DSCR3	125930	109700	89756	47474	35671	134090	104510	94492	45586	38489	133640	109885	90736.3	44512.9	37884.9	1	0.871119	0.712745	0.376987	0.283261	1.06123	0.872592	0.72053	0.353473	0.300841	0.0612269	0.00147295	0.00778474	-0.023514	0.0175803	0.0645509	NO
Q58FF6	Putative heat shock protein HSP 90-beta 4	HSP90AB4P	89975	81054	84950	64789	54284	84750	76345	89472	74986	57894	84465.8	80271.8	85915.9	73220.8	56985.3	1	0.90085	0.944151	0.720078	0.603323	0.938769	0.892157	0.954886	0.81379	0.633346	-0.0612306	-0.00869334	0.0107347	0.0937126	0.0300229	0.0645463	NO
P61981	14-3-3 protein gamma;14-3-3 protein gamma, N-terminally processed	YWHAG	1158800	1019600	1035800	847110	839830	1233900	1003400	1007800	925140	832960	1.22976e+06	1.05501e+06	967744	903362	819886	1	0.879876	0.893856	0.731023	0.724741	1.06124	0.910433	0.835126	0.779567	0.70753	0.0612374	0.0305575	-0.0587296	0.0485431	-0.0172108	0.0643975	NO
Q09028	Histone-binding protein RBBP4	RBBP4	316780	268480	247070	176720	150040	331600	257100	250290	191480	153750	330488	270324	240342	186972	151337	1	0.847528	0.779942	0.557864	0.473641	1.04327	0.853349	0.758703	0.590228	0.477735	0.0432726	0.00582101	-0.0212387	0.0323646	0.00409364	0.0643132	NO
O75771	DNA repair protein RAD51 homolog 4	RAD51D	39653	34809	29952	24187	17938	37333	34474	31936	24910	20965	37207.8	36247.2	30666.7	24323.6	20635.9	1	0.87784	0.755353	0.609966	0.452374	0.938335	0.914109	0.773376	0.613412	0.520413	-0.0616651	0.036269	0.0180232	0.00344505	0.0680387	0.064111	NO
Q6NUQ1	RAD50-interacting protein 1	RINT1	19774	13870	9157.9	7412.1	6089.1	21466	12542	9636.7	7140.1	6870.2	21394	13187.1	9253.68	6972.02	6762.37	1	0.701426	0.463128	0.374841	0.307935	1.08193	0.666891	0.467972	0.352585	0.341983	0.0819262	-0.0345353	0.00484378	-0.0222556	0.0340481	0.0640273	NO
Q92990	Glomulin	GLMN	431510	390100	396910	314800	296860	424470	370210	408500	339210	327140	423046	389252	392264	331225	322005	1	0.904035	0.919816	0.729531	0.687956	0.980386	0.902069	0.909049	0.767595	0.746229	-0.0196138	-0.00196563	-0.0107673	0.0380636	0.0582728	0.0639897	NO
P52747	Zinc finger protein 143	ZNF143	30153	24100	19520	11561	9087.5	30929	23579	19840	12941	9187.4	30825.3	24791.8	19051.4	12636.4	9043.2	1	0.799257	0.647365	0.383411	0.30138	1.0223	0.8222	0.631826	0.419075	0.29991	0.0222954	0.0229426	-0.0155394	0.0356635	-0.00146927	0.0638929	NO
Q14558	Phosphoribosyl pyrophosphate synthase-associated protein 1	PRPSAP1	352310	336020	322890	239060	196160	382650	305950	307050	274140	206600	381367	321687	294846	267687	203357	1	0.953762	0.916494	0.67855	0.556782	1.08247	0.913078	0.836894	0.759804	0.577211	0.0824748	-0.0406841	-0.0796003	0.081254	0.0204288	0.0638733	NO
Q9Y3A5	Ribosome maturation protein SBDS	SBDS	1109700	927350	983620	800420	802250	1101700	919160	985780	893190	823750	1.09801e+06	966437	946599	872164	810821	1	0.835676	0.886384	0.721294	0.722943	0.989461	0.870899	0.853023	0.785946	0.730667	-0.0105387	0.0352232	-0.033361	0.0646516	0.0077234	0.0636985	NO
P35249	Replication factor C subunit 4	RFC4	472640	393810	338770	211730	159880	459320	372160	360650	252680	167390	457780	391302	346316	246732	164763	1	0.833213	0.716761	0.447973	0.33827	0.968559	0.827907	0.732726	0.522029	0.348601	-0.0314413	-0.00530614	0.0159649	0.0740559	0.0103307	0.063604	NO
O95861	3(2),5-bisphosphate nucleotidase 1	BPNT1	989090	904140	904690	725750	769740	979850	878050	892190	813500	818300	976564	923213	856729	794350	805456	1	0.914113	0.914669	0.733755	0.77823	0.987336	0.933396	0.866179	0.803112	0.814341	-0.0126643	0.019283	-0.0484899	0.0693565	0.0361102	0.0635955	NO
Q9UI12	V-type proton ATPase subunit H	ATP6V1H	434910	389340	401060	320480	299280	419680	382960	423280	335720	322570	418273	402658	406456	327817	317507	1	0.89522	0.922168	0.736888	0.688142	0.961745	0.925841	0.934576	0.753758	0.730052	-0.038255	0.0306215	0.012408	0.0168701	0.0419099	0.0635545	NO
Q9NTX5	Ethylmalonyl-CoA decarboxylase	ECHDC1	241330	211810	204710	177670	164370	244160	208280	218210	177750	172480	243341	218993	209537	173566	169773	1	0.877678	0.848258	0.736212	0.681101	1.00833	0.907442	0.868259	0.719205	0.703488	0.00833364	0.0297639	0.0200019	-0.0170071	0.0223876	0.0634799	NO
Q9Y305	Acyl-coenzyme A thioesterase 9, mitochondrial	ACOT9	90191	69706	56141	36807	27173	89188	67055	66485	35338	28438	88888.9	70504	63842.5	34506.1	27991.6	1	0.772871	0.622468	0.408101	0.301283	0.985563	0.781719	0.707859	0.382589	0.31036	-0.0144373	0.00884772	0.085391	-0.0255111	0.0090768	0.0633671	NO
Q9BTL3	RNMT-activating mini protein	FAM103A1	147010	133950	141150	118120	116690	149430	132820	140150	123880	124050	148929	139652	134580	120964	122103	1	0.911163	0.960139	0.803483	0.793756	1.01305	0.949946	0.915445	0.822827	0.830576	0.0130525	0.0387839	-0.0446935	0.0193443	0.0368203	0.0633075	NO
Q15560	Transcription elongation factor A protein 2	TCEA2	4456.3	3646.4	3306.2	2440	2067.7	4988.5	3642.1	3457.2	2398.2	1763.1	4971.77	3829.43	3319.79	2341.75	1735.43	1	0.818257	0.741916	0.547539	0.463995	1.11567	0.85933	0.744966	0.525491	0.389432	0.115672	0.0410726	0.00304974	-0.0220485	-0.0745626	0.0631835	NO
Q7Z2Z1	Treslin	TICRR	51434	46669	45765	38288	39142	54780	43311	46124	39670	42032	54596.3	45538.7	44290.8	38736.1	41372.3	1	0.907357	0.889781	0.74441	0.761014	1.06148	0.885381	0.861118	0.753123	0.804376	0.0614824	-0.0219756	-0.0286627	0.00871309	0.0433619	0.0629191	NO
C9JLW8	Protein FAM195B	FAM195B	167750	155110	155080	135670	130780	173360	148800	157710	140560	139180	172779	156454	151442	137251	136995	1	0.92465	0.924471	0.808763	0.779613	1.02998	0.932659	0.902782	0.818189	0.816665	0.0299768	0.00800925	-0.021689	0.00942563	0.037052	0.0627747	NO
Q9BVW5	TIMELESS-interacting protein	TIPIN	60413	44644	35167	27092	20084	62037	41908	38302	27452	22046	61828.9	44063.5	36779.7	26805.8	21700	1	0.73898	0.58211	0.448447	0.332445	1.02344	0.729372	0.608804	0.443709	0.359194	0.0234378	-0.00960812	0.0266938	-0.00473794	0.0267488	0.0625343	NO
Q9NX46	Poly(ADP-ribose) glycohydrolase ARH3	ADPRHL2	314510	294780	278930	222660	226870	318480	281530	272950	244500	247020	317412	296011	262101	238744	243143	1	0.937267	0.886872	0.707958	0.721344	1.00923	0.94118	0.833364	0.759099	0.773085	0.00922676	0.00391256	-0.0535075	0.051141	0.0517403	0.0625131	NO
Q8IV48	3-5 exoribonuclease 1	ERI1	343090	327690	333530	252890	261830	324650	306000	329520	287750	302520	323561	321739	316423	280976	297772	1	0.955114	0.972136	0.737095	0.763153	0.94308	0.937769	0.922274	0.818958	0.867911	-0.0569203	-0.0173448	-0.0498617	0.0818626	0.104759	0.0624946	NO
[truncated: 3,273 more rows]

## Sheet: TPP_80%TDR
Protein IDs	Protein names	Gene names	Reporter intensity corrected 0	Reporter intensity corrected 1	Reporter intensity corrected 2	Reporter intensity corrected 3	Reporter intensity corrected 4	Reporter intensity corrected 5	Reporter intensity corrected 6	Reporter intensity corrected 7	Reporter intensity corrected 8	Reporter intensity corrected 9	Normalized 5	Normalized 6	Normalized 7	Normalized 8	Normalized 9	Vehicel_1	Vehicel_2	Vehicel_3	Vehicel_4	Vehicel_5	Drug_6	Drug_7	Drug_8	Drug_9	Drug_10	Distance1	Distance2	Distance3	Distance4	Distance5	Distance sum	kinase?	True+false positive	TRUE	TDR
[truncated: 5,140 more rows]

[truncated: 1 more sheets: SIP_80%TDR]
