# Supplementary material for: Highly effective identification of drug targets at the proteome level by pH-dependent protein precipitation
Source: Royal Society of Chemistry journal article supplement (doi:10.1039/d2sc03326g), 2022-01-01
Supplement: d2sc03326g5.xlsx [file d2sc03326g5.xlsx]

## Sheet: Sheet1
Majority protein IDs	Protein names	Gene names	Vehicel_1	Vehicel_2	Vehicel_3	Vehicel_4	Vehicel_5	Drug_6	Drug_7	Drug_8	Drug_9	Drug_10	Distance 1	Distance 2	Distance 3	Distance 4	Distance 5	Distance sum run1			Protein IDs	Protein names	Gene names	Vehicel_1	Vehicel_2	Vehicel_3	Vehicel_4	Vehicel_5	Drug_6	Drug_7	Drug_8	Drug_9	Drug_10	Distance 1	Distance 2	Distance 3	Distance 4	Distance 5	Distance sum run2
P49419	Alpha-aminoadipic semialdehyde dehydrogenase	ALDH7A1	1	0.878026	0.772545	0.719672	0.536138	1.06021	1.00004	0.941752	0.98591	0.926099	0.0602085	0.122018	0.169207	0.266238	0.389961	1.00763			P49419	Alpha-aminoadipic semialdehyde dehydrogenase	ALDH7A1	1	0.876864	0.779674	0.718934	0.533336	1.05832	1.00285	0.969121	0.970359	0.926729	0.0583166	0.125981	0.189447	0.251425	0.393393	1.01856
P28070	Proteasome subunit beta type-4	PSMB4	1	1.00943	0.791014	0.747623	0.412668	1.012	1.00169	0.92953	0.90908	0.881405	0.0119957	-0.00774827	0.138516	0.161457	0.468737	0.772957			P28070	Proteasome subunit beta type-4	PSMB4	1	0.982594	0.774286	0.723681	0.450447	1.02333	1.00583	0.902687	0.865997	0.831085	0.0233292	0.0232328	0.128401	0.142316	0.380638	0.697918
P84090	Enhancer of rudimentary homolog	ERH	1	0.938435	0.792077	0.663517	0.380092	0.99874	1.03171	0.935325	0.891266	0.665027	-0.00125955	0.0932783	0.143248	0.227749	0.284935	0.747952			P84090	Enhancer of rudimentary homolog	ERH	1	0.941129	0.795053	0.675835	0.431447	1.01798	1.01798	0.901495	0.85623	0.645028	0.0179791	0.0768548	0.106443	0.180395	0.213581	0.595253
P0DOY3	Immunoglobulin lambda constant 3	IGLC3	1	0.851723	0.751633	0.707872	0.633892	1.07021	0.925723	0.906417	0.852813	0.917746	0.0702087	0.0740002	0.154784	0.144941	0.283854	0.727787			P0DOY3	Immunoglobulin lambda constant 3	IGLC3	1	0.893461	0.864719	0.74972	0.697493	1.13529	0.955398	0.988197	0.96904	0.950957	0.135292	0.0619363	0.123478	0.21932	0.253464	0.793491
P09429	High mobility group protein B1	HMGB1	1	0.892577	0.765439	0.720577	0.487416	1.00277	0.925268	0.897295	0.920099	0.844113	0.0027669	0.0326905	0.131856	0.199522	0.356698	0.723533			P09429	High mobility group protein B1	HMGB1	1	0.925195	0.765863	0.731158	0.490644	1.00945	0.969676	0.908684	0.924461	0.850911	0.00945434	0.0444807	0.142821	0.193304	0.360267	0.750326
Q86V81	THO complex subunit 4	ALYREF	1	0.684184	0.683507	0.676851	0.461418	1.04328	0.754628	0.801206	0.822782	0.792834	0.0432822	0.0704438	0.117699	0.145931	0.331416	0.708772			Q86V81	THO complex subunit 4	ALYREF	1	0.697479	0.663395	0.630118	0.515003	1.08008	0.783383	0.816558	0.799557	0.802645	0.0800821	0.0859043	0.153163	0.16944	0.287642	0.776232
Q9H832	Ubiquitin-conjugating enzyme E2 Z	UBE2Z	1	0.921928	0.771841	0.743719	0.474819	1.01477	0.956266	0.887214	0.909497	0.832852	0.0147706	0.0343377	0.115373	0.165779	0.358033	0.688294			Q9H832	Ubiquitin-conjugating enzyme E2 Z	UBE2Z	1	0.93261	0.747506	0.751345	0.443847	1.03087	0.973989	0.899639	0.887647	0.81676	0.0308748	0.0413793	0.152133	0.136302	0.372913	0.733603
Q13162	Peroxiredoxin-4	PRDX4	1	0.967802	0.881461	0.816633	0.680501	1.0322	1.02677	0.974906	1.02082	0.972885	0.0322024	0.0589671	0.0934445	0.204187	0.292384	0.681185			Q13162	Peroxiredoxin-4	PRDX4	1	0.959749	0.851917	0.773886	0.666577	1.03836	1.00299	0.939983	0.963073	0.9172	0.0383645	0.0432398	0.0880656	0.189187	0.250622	0.60948
Q01995	Transgelin	TAGLN	1	0.863878	0.771965	0.727709	0.461292	1.0017	0.929988	0.891854	0.901911	0.776972	0.00170496	0.0661101	0.119889	0.174202	0.315679	0.677586			Q01995	Transgelin	TAGLN	1	0.888816	0.770906	0.742028	0.459237	1.02201	0.961468	0.901901	0.898513	0.774658	0.0220083	0.0726522	0.130995	0.156485	0.315421	0.697562
Q9P0L0	Vesicle-associated membrane protein-associated protein A	VAPA	1	0.897377	0.717557	0.744049	0.501648	0.976865	0.949905	0.854751	0.896553	0.855978	-0.0231355	0.0525284	0.137193	0.152504	0.35433	0.67342			Q9P0L0	Vesicle-associated membrane protein-associated protein A	VAPA	1	0.8823	0.717156	0.745778	0.492352	0.999935	0.9509	0.854119	0.892947	0.840328	-6.47955e-05	0.0685996	0.136962	0.147169	0.347976	0.700642
O15116	U6 snRNA-associated Sm-like protein LSm1	LSM1	1	0.864057	0.570417	0.516184	0.197568	1.02595	0.893208	0.715009	0.655511	0.53119	0.0259541	0.0291508	0.144592	0.139327	0.333622	0.672647			O15116	U6 snRNA-associated Sm-like protein LSm1	LSM1	1	0.781544	0.542837	0.498876	0.182126	0.94735	0.860659	0.70955	0.630835	0.518099	-0.0526502	0.0791152	0.166713	0.131958	0.335974	0.66111
P26583	High mobility group protein B2	HMGB2	1	0.803909	0.748443	0.744627	0.480851	1.03423	0.812365	0.862932	0.886319	0.845481	0.0342255	0.00845534	0.114489	0.141692	0.364629	0.663491			P26583	High mobility group protein B2	HMGB2	1	0.797583	0.760077	0.734179	0.517182	1.03704	0.853394	0.86924	0.897152	0.85012	0.0370354	0.0558108	0.109163	0.162972	0.332938	0.697919
Q53S33	BolA-like protein 3	BOLA3	1	0.972676	0.858154	0.79431	0.591386	1.08321	1.04095	0.916182	0.942848	0.892996	0.0832054	0.0682769	0.0580277	0.148538	0.30161	0.659658			Q53S33	BolA-like protein 3	BOLA3	1	1.03854	0.869282	0.738886	0.599678	1.10404	1.13828	0.909784	0.937935	0.819257	0.104043	0.099743	0.0405016	0.199049	0.219579	0.662916
Q96EK6	Glucosamine 6-phosphate N-acetyltransferase	GNPNAT1	1	0.840461	0.789945	0.803686	0.536013	1.00997	0.890775	0.886957	0.948604	0.891063	0.00997038	0.0503144	0.097012	0.144918	0.35505	0.657265			Q96EK6	Glucosamine 6-phosphate N-acetyltransferase	GNPNAT1	1	0.866103	0.79523	0.813042	0.491094	1.04053	0.944335	0.916738	0.944555	0.87687	0.0405285	0.0782323	0.121509	0.131512	0.385776	0.757558
P23921	Ribonucleoside-diphosphate reductase large subunit	RRM1	1	0.841187	0.734741	0.663885	0.5115	1.02695	0.894025	0.826886	0.8443	0.806896	0.0269492	0.0528381	0.092145	0.180415	0.295396	0.647744			P23921	Ribonucleoside-diphosphate reductase large subunit	RRM1	1	0.814304	0.713232	0.653012	0.497565	1.01985	0.833148	0.798082	0.804883	0.790351	0.0198452	0.0188445	0.0848496	0.151871	0.292786	0.568196
P05091	Aldehyde dehydrogenase, mitochondrial	ALDH2	1	0.829775	0.676718	0.507143	0.329542	0.984165	0.92896	0.837182	0.724954	0.502811	-0.0158355	0.0991848	0.160465	0.217811	0.173269	0.634894			P05091	Aldehyde dehydrogenase, mitochondrial	ALDH2	1	0.812106	0.667555	0.510409	0.319448	1.00957	0.919979	0.831914	0.716023	0.497838	0.00957431	0.107873	0.16436	0.205613	0.17839	0.665811
P49720	Proteasome subunit beta type-3	PSMB3	1	0.871626	0.811795	0.741378	0.523381	1.03706	0.863094	0.90307	0.911506	0.867277	0.0370553	-0.00853146	0.0912753	0.170129	0.343896	0.633824			P49720	Proteasome subunit beta type-3	PSMB3	1	0.862172	0.803633	0.734136	0.503788	1.07206	0.878105	0.904828	0.893862	0.830602	0.0720613	0.0159327	0.101194	0.159725	0.326815	0.675729
O43768	Alpha-endosulfine	ENSA	1	0.875115	0.838464	0.840636	0.616659	0.92943	0.924675	0.97172	0.996795	0.978096	-0.0705696	0.04956	0.133256	0.156159	0.361438	0.629843			O43768	Alpha-endosulfine	ENSA	1	0.898624	0.842182	0.828483	0.617511	0.922396	0.978803	0.954175	0.98134	0.932038	-0.077604	0.0801788	0.111993	0.152857	0.314527	0.581952
P06703	Protein S100-A6	S100A6	1	1.07392	0.84167	0.729301	0.672076	1.04473	1.12002	0.935814	0.991768	0.850975	0.0447294	0.0461033	0.0941446	0.262467	0.178899	0.626344			P06703	Protein S100-A6	S100A6	1	0.980743	0.848016	0.73901	0.646557	1.0458	1.03988	0.934824	0.936367	0.812402	0.0458003	0.0591376	0.0868082	0.197357	0.165845	0.554948
Q9GZP8	Immortalization up-regulated protein	IMUP	1	0.875076	0.811664	0.785478	0.604246	0.978032	0.955025	0.926875	0.948555	0.881061	-0.0219683	0.0799495	0.115212	0.163076	0.276815	0.613084			Q9GZP8	Immortalization up-regulated protein	IMUP	1	0.858056	0.773263	0.750975	0.572425	0.968978	0.978722	0.900758	0.891627	0.8419	-0.0310224	0.120666	0.127495	0.140652	0.269475	0.627265
Q99497	Protein deglycase DJ-1	PARK7	1	0.840264	0.857106	0.818563	0.725748	1.00282	0.940514	0.972895	0.991549	0.943602	0.00282434	0.10025	0.115789	0.172986	0.217854	0.609704			Q99497	Protein deglycase DJ-1	PARK7	1	0.840392	0.850971	0.803116	0.699596	0.998944	0.949254	0.962187	0.979121	0.929432	-0.00105622	0.108861	0.111216	0.176005	0.229836	0.624862
P61970	Nuclear transport factor 2	NUTF2	1	0.951747	0.780998	0.733886	0.466149	0.994352	0.993375	0.922049	0.838657	0.793766	-0.00564808	0.0416277	0.141051	0.104771	0.327616	0.609418			P61970	Nuclear transport factor 2	NUTF2	1	0.963266	0.814668	0.758141	0.54297	1.04016	1.03757	0.941837	0.857523	0.849838	0.0401611	0.0743062	0.127169	0.0993819	0.306868	0.647886
P35241	Radixin	RDX	1	0.884175	0.832752	0.795161	0.629149	0.99752	0.937687	0.924332	0.970623	0.917424	-0.00248049	0.0535117	0.0915802	0.175462	0.288275	0.606348			P35241	Radixin	RDX	1	0.87533	0.861198	0.831596	0.664385	1.01413	0.944639	0.954055	0.98718	0.929046	0.0141335	0.0693097	0.0928566	0.155584	0.264661	0.596545
P31948	Stress-induced-phosphoprotein 1	STIP1	1	0.965536	0.785997	0.789374	0.615576	0.933965	1.0138	0.940139	0.90154	0.960586	-0.0660351	0.0482593	0.154141	0.112166	0.34501	0.593541			P31948	Stress-induced-phosphoprotein 1	STIP1	1	0.922965	0.815332	0.788814	0.612417	0.960267	0.98832	0.936725	0.957759	0.931174	-0.0397334	0.065355	0.121392	0.168945	0.318757	0.634715
P10619	Lysosomal protective protein;Lysosomal protective protein 32 kDa chain;Lysosomal protective protein 20 kDa chain	CTSA	1	0.928403	0.862081	0.747411	0.646383	1.00042	1.00299	0.920124	0.947787	0.906394	0.000417373	0.0745893	0.0580439	0.200375	0.260011	0.593437			P10619	Lysosomal protective protein;Lysosomal protective protein 32 kDa chain;Lysosomal protective protein 20 kDa chain	CTSA	1	0.901525	0.860274	0.752727	0.648485	1.01666	0.984425	0.91632	0.937253	0.888935	0.0166631	0.0828997	0.056046	0.184525	0.24045	0.580584
O00244	Copper transport protein ATOX1	ATOX1	1	0.9895	0.833651	0.74231	0.586729	1.04332	1.0315	0.91781	0.933533	0.817665	0.0433238	0.041998	0.0841594	0.191222	0.230937	0.59164			O00244	Copper transport protein ATOX1	ATOX1	1	0.816358	0.772534	0.727978	0.553635	1.07433	0.873024	0.911356	0.87986	0.802348	0.0743349	0.0566658	0.138822	0.151882	0.248713	0.670418
Q99417	C-Myc-binding protein	MYCBP	1	0.847213	0.827747	0.807415	0.676369	1.01502	0.910257	0.934761	0.958867	0.930809	0.0150179	0.0630438	0.107014	0.151452	0.25444	0.590968			Q99417	C-Myc-binding protein	MYCBP	1	0.870561	0.836003	0.811556	0.687073	1.05427	0.935342	0.919935	0.967671	0.916323	0.0542736	0.0647813	0.0839315	0.156115	0.22925	0.588352
Q9Y6N5	Sulfide:quinone oxidoreductase, mitochondrial	SQRDL	1	0.632414	0.413076	0.28466	0.213689	1.09904	0.749788	0.637783	0.429656	0.218259	0.0990353	0.117374	0.224707	0.144996	0.0045696	0.590681			Q9Y6N5	Sulfide:quinone oxidoreductase, mitochondrial	SQRDL	1	0.661684	0.378877	0.275105	0.187892	1.09895	0.763382	0.623189	0.410363	0.20195	0.0989482	0.101698	0.244312	0.135258	0.0140582	0.594275
P40926	Malate dehydrogenase, mitochondrial	MDH2	1	0.992387	0.821608	0.790007	0.613681	1.02923	1.02532	0.924009	0.958938	0.865547	0.0292272	0.032936	0.102401	0.168931	0.251866	0.585362			P40926	Malate dehydrogenase, mitochondrial	MDH2	1	0.964574	0.792677	0.768615	0.585426	1.01917	1.00378	0.904462	0.90071	0.832152	0.0191691	0.0392013	0.111785	0.132095	0.246727	0.548978
Q92804	TATA-binding protein-associated factor 2N	TAF15	1	0.806371	0.682746	0.668536	0.498183	1.00047	0.851068	0.792217	0.817726	0.779534	0.000469806	0.0446972	0.10947	0.14919	0.281351	0.585178			Q92804	TATA-binding protein-associated factor 2N	TAF15	1	0.747859	0.656509	0.662113	0.46172	1.0232	0.822806	0.788665	0.785027	0.75294	0.0231993	0.0749469	0.132156	0.122914	0.29122	0.644437
P54819	Adenylate kinase 2, mitochondrial;Adenylate kinase 2, mitochondrial, N-terminally processed	AK2	1	0.915598	0.788282	0.75457	0.521966	0.990386	0.978973	0.88508	0.887878	0.820171	-0.0096137	0.0633751	0.0967977	0.133307	0.298205	0.582072			P54819	Adenylate kinase 2, mitochondrial;Adenylate kinase 2, mitochondrial, N-terminally processed	AK2	1	0.908966	0.780496	0.755392	0.514616	1.00294	0.971907	0.884934	0.886044	0.807112	0.00294067	0.0629407	0.104437	0.130652	0.292496	0.593467
P16930	Fumarylacetoacetase	FAH	1	0.791544	0.822311	0.749053	0.555597	1.01571	0.82963	0.895829	0.891842	0.863286	0.0157111	0.0380866	0.0735182	0.142789	0.307689	0.577794			P16930	Fumarylacetoacetase	FAH	1	0.861628	0.863298	0.791492	0.601406	1.06132	0.935388	0.920599	0.953974	0.910474	0.0613239	0.0737599	0.0573016	0.162481	0.309068	0.663934
P62328	Thymosin beta-4;Hematopoietic system regulatory peptide	TMSB4X	1	0.900764	0.89038	0.843119	0.644212	0.960416	0.948519	0.968009	1.00588	0.968579	-0.0395841	0.0477555	0.0776293	0.162761	0.324367	0.572928			P62328	Thymosin beta-4;Hematopoietic system regulatory peptide	TMSB4X	1	0.911676	0.880411	0.841376	0.631217	0.973453	0.96486	0.965706	0.99372	0.940509	-0.0265465	0.0531841	0.085295	0.152344	0.309292	0.573569
A1L390	Pleckstrin homology domain-containing family G member 3	PLEKHG3	1	0.782302	0.755073	0.514535	0.528849	0.961473	0.952893	0.909025	0.670723	0.659471	-0.0385268	0.170591	0.153952	0.156189	0.130623	0.572828			A1L390	Pleckstrin homology domain-containing family G member 3	PLEKHG3	1	0.75786	0.703562	0.51386	0.543997	0.942576	0.873442	0.850693	0.718029	0.684231	-0.0574243	0.115582	0.147131	0.204169	0.140234	0.549691
P16070	CD44 antigen	CD44	1	0.953657	0.783832	0.776187	0.577208	1.02577	0.989315	0.883611	0.917415	0.847093	0.025773	0.0356581	0.0997796	0.141228	0.269885	0.572324			P16070	CD44 antigen	CD44	1	0.970835	0.799315	0.801854	0.595896	1.00647	1.05725	0.917648	0.943177	0.865266	0.00646947	0.0864102	0.118333	0.141322	0.26937	0.621906
P37235	Hippocalcin-like protein 1;Neuron-specific calcium-binding protein hippocalcin	HPCAL1;HPCA	1	0.839176	0.827818	0.809374	0.6229	1.02202	0.916182	0.907573	0.944181	0.879823	0.0220168	0.077006	0.0797542	0.134807	0.256923	0.570507			P37235	Hippocalcin-like protein 1;Neuron-specific calcium-binding protein hippocalcin	HPCAL1;HPCA	1	0.841297	0.831554	0.791603	0.633474	1.02922	0.928131	0.903547	0.919641	0.867726	0.0292244	0.086834	0.0719926	0.128038	0.234252	0.550341
P55145	Mesencephalic astrocyte-derived neurotrophic factor	MANF	1	0.886067	0.844182	0.777182	0.673267	1.01014	0.951198	0.923113	0.954733	0.911392	0.0101418	0.0651314	0.078931	0.177551	0.238125	0.56988			P55145	Mesencephalic astrocyte-derived neurotrophic factor	MANF	1	0.92727	0.851605	0.8073	0.690799	1.0264	1.01584	0.930411	0.954716	0.901686	0.0264031	0.0885656	0.0788058	0.147416	0.210888	0.552078
Q9P258	Protein RCC2	RCC2	1	0.809183	0.782751	0.742473	0.687192	1.0096	0.885311	0.863209	0.919218	0.91335	0.00959678	0.076128	0.0804579	0.176745	0.226159	0.569086			Q9P258	Protein RCC2	RCC2	1	0.800227	0.780394	0.761333	0.694364	1.02621	0.892887	0.893375	0.939876	0.929295	0.0262111	0.0926605	0.112981	0.178543	0.23493	0.645326
O43924	Retinal rod rhodopsin-sensitive cGMP 3,5-cyclic phosphodiesterase subunit delta	PDE6D	1	0.898886	0.878259	0.825054	0.579807	1.11604	1.02092	0.935233	0.917226	0.759493	0.116037	0.122032	0.056974	0.0921718	0.179686	0.566901			O43924	Retinal rod rhodopsin-sensitive cGMP 3,5-cyclic phosphodiesterase subunit delta	PDE6D	1	0.893772	0.864219	0.793155	0.547592	1.14885	1.01884	0.946055	0.910143	0.75061	0.148848	0.125064	0.0818363	0.116988	0.203018	0.675753
Q99436	Proteasome subunit beta type-7	PSMB7	1	0.827738	0.798512	0.807616	0.556715	0.947483	0.875662	0.915277	0.929103	0.884153	-0.0525172	0.0479234	0.116766	0.121486	0.327438	0.561096			Q99436	Proteasome subunit beta type-7	PSMB7	1	0.862647	0.798259	0.811976	0.550465	0.977431	0.907688	0.921054	0.903137	0.864509	-0.0225691	0.0450411	0.122795	0.0911609	0.314044	0.550472
O15155	BET1 homolog	BET1	1	0.889819	0.692988	0.687039	0.463977	1.0305	0.895852	0.77811	0.82024	0.76772	0.0304978	0.00603334	0.0851219	0.1332	0.303743	0.558597			O15155	BET1 homolog	BET1	1	0.841887	0.706319	0.679003	0.543107	1.04252	0.926209	0.810651	0.860522	0.769808	0.0425195	0.084322	0.104332	0.181519	0.226702	0.639394
Q15637	Splicing factor 1	SF1	1	0.850068	0.82121	0.772281	0.568158	0.970286	0.888766	0.948954	0.922245	0.835506	-0.0297144	0.0386984	0.127745	0.149964	0.267348	0.554041			Q15637	Splicing factor 1	SF1	1	0.872098	0.806854	0.771998	0.500523	0.947643	0.935794	0.931288	0.90238	0.824524	-0.0523572	0.0636962	0.124434	0.130382	0.324001	0.590156
A0A0B4J2F0		PIGBOS1	1	1.05442	0.924539	0.86476	0.887735	1.0194	1.08366	1.08191	1.04709	1.05307	0.0194009	0.0292481	0.157375	0.182335	0.165331	0.55369			A0A0B4J2F0		PIGBOS1	1	0.987891	0.841448	0.837042	0.76718	0.989724	1.05849	1.05296	1.07737	0.970199	-0.0102764	0.0705993	0.211507	0.240325	0.203019	0.715175
P22061	Protein-L-isoaspartate(D-aspartate) O-methyltransferase	PCMT1	1	0.92943	0.764312	0.689477	0.368957	0.970774	0.955108	0.891713	0.855519	0.631653	-0.0292265	0.0256782	0.127401	0.166042	0.262696	0.552591			P22061	Protein-L-isoaspartate(D-aspartate) O-methyltransferase	PCMT1	1	0.92373	0.743525	0.668412	0.34213	0.973072	0.958951	0.87389	0.812158	0.613182	-0.0269283	0.0352217	0.130365	0.143746	0.271052	0.553457
Q13740	CD166 antigen	ALCAM	1	0.882455	0.821103	0.782775	0.654406	1.03194	0.93224	0.917792	0.935012	0.873739	0.0319428	0.0497843	0.0966883	0.152237	0.219332	0.549985			Q13740	CD166 antigen	ALCAM	1	0.905541	0.844986	0.797482	0.654843	1.05329	0.980792	0.923834	0.966555	0.889944	0.0532873	0.0752512	0.0788479	0.169072	0.235101	0.61156
