# Supplementary material for: Highly effective identification of drug targets at the proteome level by pH-dependent protein precipitation
Source: Royal Society of Chemistry journal article supplement (doi:10.1039/d2sc03326g), 2022-01-01
Supplement: d2sc03326g6.xlsx [file d2sc03326g6.xlsx]

## Sheet: Sheet1
Name	ID	AI-based (μM)	Docking score (kcal/mol)
SHMT2	P34897	285.18	-7.2
ALDH7A1	P49419	315.63	-7
ACTG1	P63261	426.29	-5.9
ATP5L	O75964	458.63	-5.7
ATOX1	O00244	500.83	-5
BET1	O15155	567.71	-5.6
NUTF2	P61970	623.48	-6.5
HSPB1	P04792	628.94	/
CFL1	P23528	681.32	-4.7
MANF	P55145	706.93	-6.1
PSMB7	Q99436	878.22	-6.4
HNRNPA2B1	P22626	900.27	-6
S100A6	P06703	921.73	-3
TAGLN	Q01995	970.53	/
PRDX4	Q13162	976.24	-7.3
CCT3	P49368	985.69	-4.2
SQRDL	Q9Y6N5	991.78	-7.1
RPS19	P39019	1023.85	/
UBE2Z	Q9H832	1045.84	-6.1
ERH	P84090	1060.94	-6.3
RPS8	P62241	1116.13	/
PARK7	Q99497	1261.7	-5.6
BOLA3	Q53S33	1279.01	-6.4
ZYX	Q15942	1307.67	-4.8
PIGBOS1	A0A0B4J2F0	1393.17	-5
PGAM1	P18669	1408.05	-6.9
PCMT1	P22061	1428.82	-6.2
RPL35	P42766	1437.65	/
LSM1	O15116	1460.03	-6
DPYSL2	Q16555	1470.78	-7.8
PSMB3	P49720	1502.5	-6.4
TAGLN2	P37802	1505.33	/
RPL23A	P62750	1514.13	/
PLEKHG3	A1L390	1560.5	-7.3
HMGB1	P09429	1641.24	-6.6
IQGAP1	P46940	1646.73	/
STIP1	P31948	1722.09	-5.8
ALCAM	Q13740	1727.84	-6.6
TPM1	P09493	1746.22	/
ENSA	O43768	1773.49	-5.2
HPCAL1;HPCA	P37235	1789.8	-7.4
VAPA	Q9P0L0	1889.29	-5.9
PRDX1	Q06830	1940.42	-6.4
TUBA1A	Q71U36	1974.95	-7.2
HP1BP3	Q5SSJ5	1994.94	-4.1
ANXA2	P07355	2052.96	-6.7
AK2	P54819	2062.14	-6.8
PDE6D	O43924	2086.22	-8.2
IGLC3	P0DOY3	2105.55	-6.2
RPS5	P46782	2119.93	/
SRSF4	Q08170	2157.89	-5.2
FAH	P16930	2278.45	-8.3
RPL4	P36578	2295.62	/
GNPNAT1	Q96EK6	2314.02	-7.8
DDX39B	Q13838	2331.44	-6.5
RPL14	P50914	2382.02	/
SF1	Q15637	2405.19	-4.2
ALDH2	P05091	2442.52	-5.7
ATP5A1	P25705	2470.07	-5.8
NPM1	P06748	2478.6	-5.5
P4HB	P07237	2556.26	-6.6
RDX	P35241	2558.43	-8.1
ALYREF	Q86V81	2604.85	-6.1
CSRP1	P21291	2690.3	-4.2
MYCBP	Q99417	2763.84	-3.7
IMUP	Q9GZP8	2794.41	-4.5
CLIC1	O00299	2876.84	-7
TUBB6	Q9BUF5	2913.19	-6.9
TUBB	P07437	2927.74	-6.3
RPS6	P62753	2952.49	/
RPS9	P46781	2954.17	/
PGK1	P00558	2956.27	-6.8
TMSB4X	P62328	2965.45	-2.4
HNRNPK	P61978	3144.16	-7
NPEPPS	P55786	3206.3	-7.6
PPIA	P62937	3214.57	-7.2
TUBB4A	P04350	3501.51	-7
RPL18	Q07020	3540.67	/
MYH9	P35579	3555.62	-5
ENO1	P06733	3622.54	-6.7
RCC2	Q9P258	3750.74	-8
HNRNPD	Q14103	3815.08	-4.8
CYCS	P99999	3933.98	-5.6
PSMB4	P28070	4035.78	-6.6
SRP14	P37108	4214.78	-5.9
ALB	P02768	4401.7	-6.5
CAST	P20810	4440.71	/
ATP5O	P48047	4549.18	-5.9
RPS17	P08708	4628.34	/
FLNA	P21333	4695.94	/
SNRPD2	P62316	4698.59	/
SFPQ	P23246	4930.11	-4.1
ALDOA	P04075	5014.26	-6.4
LDHA	P00338	5069.57	-6.6
RPS28	P62857	5069.97	/
MAP4	P27816	5252.12	-5.6
EEF1A1	P68104	5338.51	/
RPL10	P27635	5393.53	/
PKM	P14618	6178.5	-6.9
KHSRP	Q92945	6426.79	-6.5
VIM	P08670	6429.44	/
TPI1	P60174	7297.08	-6
GPI	P06744	7398.24	-6.7
TAF15	Q92804	7527.82	-6.1
RPS18	P62269	7621.31	/
CD44	P16070	7690.71	-6.4
RPS13	P62277	7841.54	/
FTO	Q9C0B1	8011.21	-7
PFN1	P07737	8066.19	-6.2
CTSA	P10619	9030.93	-8
MDH2	P40926	9605.47	-6.4
DSP	P15924	10579.3	/
HMGB2	P26583	11944.9	-6
LGALS1	P09382	12881.6	-3.4
LDHB	P07195	12893.1	-6
MDH1	P40925	13491.6	-6.9
GAPDHS	O14556	17117.8	-7.3
DDX5	P17844	17145.9	-6.9
RRM1	P23921	18384.4	-7.5
HSPA8	P11142	35481.9	-6.7
G6PD	P11413	47201.1	-6
GAPDH	P04406	62855.6	-5.6
(Targets from pHDPP are labelled in yellow)	(Cancer-related targets from pHDPP are labelled in red)		(Proteins act as structural part of organelles, like ribosome, didn't do the docking simulation)
