# Supplementary material for: Highly effective identification of drug targets at the proteome level by pH-dependent protein precipitation
Source: Royal Society of Chemistry journal article supplement (doi:10.1039/d2sc03326g), 2022-01-01
Supplement: d2sc03326g7.xlsx [file d2sc03326g7.xlsx]

## Sheet: Sheet1
Name	ID	AI-based (μM)	Docking score (kcal/mol)	Structure ID
SHMT2	P34897	285.18	-7.2	6QVL
ALDH7A1	P49419	315.63	-7	2J6L
ACTG1	P63261	426.29	-5.9	5JLH
ATP5L	O75964	458.63	-5.7	Alphafold2
ATOX1	O00244	500.83	-5	7DC1
BET1	O15155	567.71	-5.6	Alphafold2
NUTF2	P61970	623.48	-6.5	1GY5
HSPB1	P04792	628.94	/	6DV5
CFL1	P23528	681.32	-4.7	5L6W
MANF	P55145	706.93	-6.1	2W51
PSMB7	Q99436	878.22	-6.4	7NHT
HNRNPA2B1	P22626	900.27	-6	5WWG
S100A6	P06703	921.73	-3	1K96
TAGLN	Q01995	970.53	/	/
PRDX4	Q13162	976.24	-7.3	3TJJ
CCT3	P49368	985.69	-4.2	7LUM
SQRDL	Q9Y6N5	991.78	-7.1	6WH6
RPS19	P39019	1023.85	/	/
UBE2Z	Q9H832	1045.84	-6.1	5A4P
ERH	P84090	1060.94	-6.3	2NML
RPS8	P62241	1116.13	/	/
PARK7	Q99497	1261.7	-5.6	6AFL
BOLA3	Q53S33	1279.01	-6.4	2NCL
ZYX	Q15942	1307.67	-4.8	Alphafold2
PIGBOS1	A0A0B4J2F0	1393.17	-5	Alphafold2
PGAM1	P18669	1408.05	-6.9	4GPZ
PCMT1	P22061	1428.82	-6.2	1I1N
RPL35	P42766	1437.65	/	/
LSM1	O15116	1460.03	-6	Alphafold2
DPYSL2	Q16555	1470.78	-7.8	5LXX
PSMB3	P49720	1502.5	-6.4	5LE5
TAGLN2	P37802	1505.33	/	1WYM
RPL23A	P62750	1514.13	/	/
PLEKHG3	A1L390	1560.5	-7.3	Alphafold2
HMGB1	P09429	1641.24	-6.6	6CIK
IQGAP1	P46940	1646.73	/	/
STIP1	P31948	1722.09	-5.8	1ELW, 3ESK, 2LNI
ALCAM	Q13740	1727.84	-6.6	5A2F
TPM1	P09493	1746.22	/	/
ENSA	O43768	1773.49	-5.2	Alphafold2
HPCAL1;HPCA	P37235	1789.8	-7.4	5T7C
VAPA	Q9P0L0	1889.29	-5.9	6TQR
PRDX1	Q06830	1940.42	-6.4	3HY2
TUBA1A	Q71U36	1974.95	-7.2	6WSL
HP1BP3	Q5SSJ5	1994.94	-4.1	Alphafold2
ANXA2	P07355	2052.96	-6.7	2HYV
AK2	P54819	2062.14	-6.8	2C9Y
PDE6D	O43924	2086.22	-8.2	5YAW
IGLC3	P0DOY3	2105.55	-6.2	7FAB
RPS5	P46782	2119.93	/	/
SRSF4	Q08170	2157.89	-5.2	Alphafold2
FAH	P16930	2278.45	-8.3	Alphafold2
RPL4	P36578	2295.62	/	/
GNPNAT1	Q96EK6	2314.02	-7.8	2O28
DDX39B	Q13838	2331.44	-6.5	1XTI
RPL14	P50914	2382.02	/	/
SF1	Q15637	2405.19	-4.2	1K1G
ALDH2	P05091	2442.52	-5.7	5L13
ATP5A1	P25705	2470.07	-5.8	Alphafold2
NPM1	P06748	2478.6	-5.5	Alphafold2
P4HB	P07237	2556.26	-6.6	6I7S
RDX	P35241	2558.43	-8.1	Alphafold2
ALYREF	Q86V81	2604.85	-6.1	3ULH
CSRP1	P21291	2690.3	-4.2	Alphafold2
MYCBP	Q99417	2763.84	-3.7	2YY0
IMUP	Q9GZP8	2794.41	-4.5	Alphafold2
CLIC1	O00299	2876.84	-7	4K0N
TUBB6	Q9BUF5	2913.19	-6.9	Alphafold2
TUBB	P07437	2927.74	-6.3	6I2I
RPS6	P62753	2952.49	/	/
RPS9	P46781	2954.17	/	/
PGK1	P00558	2956.27	-6.8	5O7D
TMSB4X	P62328	2965.45	-2.4	4PL7
HNRNPK	P61978	3144.16	-7	Alphafold2
NPEPPS	P55786	3206.3	-7.6	Alphafold2
PPIA	P62937	3214.57	-7.2	6X3Y
TUBB4A	P04350	3501.51	-7	Alphafold2
RPL18	Q07020	3540.67	/	/
MYH9	P35579	3555.62	-5	Alphafold2
ENO1	P06733	3622.54	-6.7	3B97
RCC2	Q9P258	3750.74	-8	5GWN
HNRNPD	Q14103	3815.08	-4.8	1WTB, 1HD0
CYCS	P99999	3933.98	-5.6	5TY3
PSMB4	P28070	4035.78	-6.6	5M32
SRP14	P37108	4214.78	-5.9	4UYJ
ALB	P02768	4401.7	-6.5	6ZL1
CAST	P20810	4440.71	/	Alphafold2
ATP5O	P48047	4549.18	-5.9	Alphafold2
RPS17	P08708	4628.34	/	/
FLNA	P21333	4695.94	/	/
SNRPD2	P62316	4698.59	/	/
SFPQ	P23246	4930.11	-4.1	6NCQ
ALDOA	P04075	5014.26	-6.4	6XML
LDHA	P00338	5069.57	-6.6	6BB0
RPS28	P62857	5069.97	/	/
MAP4	P27816	5252.12	-5.6	Alphafold2
EEF1A1	P68104	5338.51	/	6ZMO
RPL10	P27635	5393.53	/	/
PKM	P14618	6178.5	-6.9	6WP3
KHSRP	Q92945	6426.79	-6.5	Alphafold2
VIM	P08670	6429.44	/	/
TPI1	P60174	7297.08	-6	6UPF
GPI	P06744	7398.24	-6.7	6XUI
TAF15	Q92804	7527.82	-6.1	2MMY
RPS18	P62269	7621.31	/	/
CD44	P16070	7690.71	-6.4	4PZ3
RPS13	P62277	7841.54	/	/
FTO	Q9C0B1	8011.21	-7	4IE5
PFN1	P07737	8066.19	-6.2	6NBE
CTSA	P10619	9030.93	-8	4CI9
MDH2	P40926	9605.47	-6.4	2DFD
DSP	P15924	10579.3	/	1LM7, 5DZZ
HMGB2	P26583	11944.9	-6	Alphafold2
LGALS1	P09382	12881.6	-3.4	6M5Y
LDHB	P07195	12893.1	-6	7DBJ
MDH1	P40925	13491.6	-6.9	7RM9
GAPDHS	O14556	17117.8	-7.3	5C7L
DDX5	P17844	17145.9	-6.9	4A4D
RRM1	P23921	18384.4	-7.5	5TUS
HSPA8	P11142	35481.9	-6.7	4H5V
G6PD	P11413	47201.1	-6	6VAQ
GAPDH	P04406	62855.6	-5.6	6YND
(Targets from pHDPP are labelled in yellow)	(Cancer-related targets from pHDPP are labelled in red)		(Proteins act as structural part of organelles, like ribosome, didn't do the docking simulation)
